# Supplementary material for: Pharmacological or TRIB3-Mediated Suppression of ATF4 Transcriptional Activity Promotes Hepatoma Cell Resistance to Proteasome Inhibitor Bortezomib
Source: MDPI journal article supplement (doi:10.3390/cancers13102341), 2021-05-12
Supplement: s1 [file s1]

**Supplementary Table S4. Oligonucleotides used for plasmid construction and PCR, RT-PCR, RT-qPCR and ChIP-qPCR experiments.**

**Oligonucleotides used for preparing the pFETCh-TRIB3 construct**

**PCR primers for the amplification of the 5'-homology arm:**

Oligo hTRIB3-5FL-S (#942): 5'-CCTGGTCTCAAGCTGGGTCAAGGGCCAGGAACAC-3'

Oligo hTRIB3-5FL-AS (#943): 5'-CCTGGTCTCTGCTCCCGCCATACAGAACCACTTCTCTGTCTCCCTC-3'

**PCR primers for the amplification of the 3'-homology arm:**

Oligo hTRIB3-3FL-S (#944): 5'-CCTGAAGACATCATCACGCTCAGCTGCCAACAGTGG-3'

Oligo hTRIB3-3FL-AS (#945): 5'-CCTGAAGACATCAAGGCCTTTCACCATGGGGGCCAG-3'

**Oligonucleotides used for preparing the CRISPR gRNA constructs for 3xFlag cassette insertion into the endogenous *TRIB3* locus**

**Oligonucleotides for hTRIB3-HDR-guide1:**

Oligo hTRIB3-HDR-guide1A (#946): 5'-CACCGCAGCTGAGCGTGTAGTAGGG-3'

Oligo hTRIB3- HDR-guide1B (#947): 5'-AAACCCCTACTACACGCTCAGCTGC-3'

**Oligonucleotides for hTRIB3-HDR-guide2:**

Oligo hTRIB3-HDR-guide2A (#948): 5'-CACCGAGCTGAGCGTGTAGTAGGG-3'

Oligo hTRIB3-HDR-guide2B (#949): 5'-AAACCCCTACTACACGCTCAGCTC-3'

### **PCR primers for validation of 3xFlag cassette insertion into the endogenous *TRIB3* locus**

#### **PCR primers for 5'-region validation:**

Oligo pFETCh-SEQ-P2A (#952): 5'-CAGCAGGCTGAAGTTAGTAGC-3'

Oligo hTRIB3-vali-Int3-S (#956): 5'-CCACTGGACACCCAGGAAGTAATGC-3'

#### **PCR primers for 3'-region validation:**

Oligo pFETCh-Neo-3PRI-S (#955): 5'-ACCGCTTCCTCGTGCTTTAC-3'

Oligo hTRIB3-vali-3FL-AS (#957): 5'-CAATGACCCCTGGCTTCTTCCTC-3'

### **Oligonucleotides used for preparing CRISPR gRNA constructs to disrupt the human *TRIB3* gene**

#### **hTRIB3-KO-guide1:**

Oligo hTRIB3-KO-guide1A (#978): 5'-CACCGCAGAGGGGTGGCTCGCATC-3'

Oligo hTRIB3-KO-guide1B (#979): 5'-AAACGATGCGAGCCACCCCTCTGC-3'

#### **hTRIB3-KO-guide2:**

Oligo hTRIB3-KO-guide2A (#980): 5'-CACCGACATAGGGCCCAAGACGGG-3'

Oligo hTRIB3-KO-guide2B (#981): 5'-AAACCCCGTCTTGGGCCCTATGTC-3'

### **PCR primers used for validation of CRISPR/Cas9-mediated disruption of the *TRIB3* gene**

Forward (#1050): 5'-CACCCCCTATAAATGTTGTGCCACGT-3'

Reverse (#1051): 5'-GCAGGTATACTCAGTGCCTGTAGGGC-3'

**Oligonucleotides used for making CRISPR guide RNA construct targeting the AAVS1 locus (used as a control region) of the human genome**

**AAVS1-KO-guide1:**

Oligo AAVS1-KO-guide1A (#1023): 5'-CACCGTTAATGTGGCTCTGGTTCT-3'

Oligo AAVS1-KO-guide1B (#1024): 5'-AAACAGAACCAGAGCCACATTAAC-3'

**Primer sequences used for RT-PCR, RT-qPCR and ChIP-qPCR experiments**

| Method  | Target               | Forward primer (5'→ 3') | Reverse primer (5'→ 3') |
|---------|----------------------|-------------------------|-------------------------|
| RT-PCR  | <i>XBPI</i> splicing | AGCCAAGGGGAATGAAGTGAG   | CTGGGTCCAAGTTGTCCAGAA   |
|         | <i>GAPDH</i> mRNA    | TGCACCACCAACTGCTTAGC    | GGCATGGACTGTGGTCATGAG   |
| RT-qPCR | <i>TRIB3</i> mRNA    | TTTGTCTTCGCTGACCGTGA    | TGCTTGTCCACAGGGAATC     |
|         | <i>ASNS</i> mRNA     | ATCACTGTCGGGATGTACCC    | CTTCAACAGAGTGGCAGCAA    |
|         | <i>SLC7A11</i> mRNA  | GCAAGCACACTCCTCTACCA    | GCACCTTGAAAGGACGATGC    |
|         | <i>MTHFD2</i> mRNA   | CCATGTTACCGGCTACTCCA    | GTAACAGTGGCATCACCTCCG   |
|         | <i>PSAT1</i> mRNA    | CCGTGGTGATTGTCCGTGAT    | ATCCACTCCAGAACCAAGCC    |
|         | <i>DDIT4</i> mRNA    | GGTTTGACCGCTCCACGAG     | GGTAAGCCGTGTCTTCCTCC    |
|         | <i>SES2</i> mRNA     | CCACTCAGAGAAGGTCCACG    | GAGTCAGGTCATGTAGCGGG    |
|         | <i>DDIT3</i> mRNA    | CCTGCAAGAGGTCCTGTCTT    | GTGACCTCTGCTGGTTCTGG    |
|         | <i>HSPA5</i> mRNA    | GAACACAGTGGTGCCTACCAA   | AGGTGACTTCAATCTGTGGGAC  |
|         | <i>HSP90B1</i> mRNA  | GTTTCCCGCGAGACTCTTCA    | ACGTGTTTCGATTTCGAGTGGT  |
|         | <i>GAPDH</i> mRNA    | TGCACCACCAACTGCTTAGC    | GGCATGGACTGTGGTCATGAG   |

---

|           |                                          |                         |                             |
|-----------|------------------------------------------|-------------------------|-----------------------------|
| ChIP-qPCR | <i>DDIT4</i> promoter                    | CTGCCAGGCCAGATTTTCCT    | GCCATCCCGTGTTTCATCA         |
|           | <i>ASNS</i> promoter                     | AGGGATGTGGACAGCTTGAC    | GCAGGCATGATGAAACTTCC        |
|           | <i>TRIB3</i> promoter                    | GGTCCCAGGTGCAGCGGATGCAG | CGGGTGATGCAAACCGGAGCTAATCAG |
|           | <i>PSAT1</i> promoter                    | AATCTCGCGCGCTCCTTG      | CATTGGTCGCGCTTCTGAG         |
|           | Neg. control<br>region near <i>TRIB3</i> | GAGTCCCCAGCTGTGCTAAC    | GTCCGAGTGAAAAAGGCGTA        |

---
