# Supplementary material for: Pharmacological or TRIB3-Mediated Suppression of ATF4 Transcriptional Activity Promotes Hepatoma Cell Resistance to Proteasome Inhibitor Bortezomib
Source: MDPI journal article supplement (doi:10.3390/cancers13102341), 2021-05-12
Supplement: s1 [file s1]

**Supplementary Table S3. Motif enrichment results for ChIP-Seq peaks**

**(A) HOMER *de novo* Motif Results – TRIB3 peaks (bortezomib treated)**

Total target sequences = 7635

Total background sequences = 42011

| Rank | Motif                                                                               | P-value | % of Targets | % of Background | Best Match/Details (Match Score)                                                                                                       |
|------|-------------------------------------------------------------------------------------|---------|--------------|-----------------|----------------------------------------------------------------------------------------------------------------------------------------|
| 1    |    | 1e-3283 | 53.01%       | 4.37%           | Chop(bZIP)/MEF-Chop-ChIP-Seq(GSE35681)/Homer(0.98)<br>Atf4(bZIP)/MEF-Atf4-ChIP-Seq(GSE35681)/Homer(0.98)<br>ATF4/MA0833.1/Jaspar(0.92) |
| 2    |    | 1e-508  | 29.23%       | 9.57%           | BATF(bZIP)/Th17-BATF-ChIP-Seq(GSE39756)/Homer(0.976)                                                                                   |
| 3    |    | 1e-162  | 14.98%       | 6.21%           | HNF4G/MA0484.1/Jaspar(0.959)                                                                                                           |
| 4    |    | 1e-154  | 42.38%       | 28.17%          | FOXP1/MA0481.2/Jaspar(0.907)                                                                                                           |
| 5    |    | 1e-99   | 14.26%       | 7.22%           | Nr5a2/MA0505.1/Jaspar(0.949)                                                                                                           |
| 6    |    | 1e-96   | 1.35%        | 0.06%           | ISRE(IRF)/ThioMac-LPS-Expression(GSE23622)/Homer(0.753)                                                                                |
| 7    |   | 1e-93   | 20.41%       | 12.10%          | TEAD1(TEAD)/HepG2-TEAD1-ChIP-Seq(Encode)/Homer(0.793)                                                                                  |
| 8    |  | 1e-77   | 1.32%        | 0.09%           | ZNF416(Zf)/HEK293-ZNF416.GFP-ChIP-Seq(GSE58341)/Homer(0.591)                                                                           |
| 9    |  | 1e-76   | 1.36%        | 0.10%           | TEAD3(TEA)/HepG2-TEAD3-ChIP-Seq(Encode)/Homer(0.688)                                                                                   |
| 10   |  | 1e-74   | 0.71%        | 0.01%           | Pax7(Paired,Homeobox),long/Myoblast-Pax7-ChIP-Seq(GSE25064)/Homer(0.692)                                                               |
| 11   |  | 1e-64   | 0.67%        | 0.02%           | PB0068.1_Sox1_1/Jaspar(0.649)                                                                                                          |
| 12   |  | 1e-61   | 1.56%        | 0.21%           | STAT5(Stat)/mCD4+-Stat5-ChIP-Seq(GSE12346)/Homer(0.714)                                                                                |
| 13   |  | 1e-56   | 0.58%        | 0.01%           | PB0098.1_Zfp410_1/Jaspar(0.586)                                                                                                        |
| 14   |  | 1e-54   | 1.24%        | 0.14%           | Arid3a/MA0151.1/Jaspar(0.673)                                                                                                          |
| 15   |  | 1e-53   | 0.45%        | 0.01%           | Oct4:Sox17(POU,Homeobox,HMG)/F9-Sox17-ChIP-Seq(GSE44553)/Homer(0.661)                                                                  |

## (B) HOMER *de novo* Motif Results – TRIB3 peaks (untreated)

Total target sequences = 487

Total background sequences = 48823

\* - possible false positive (HOMER warning)

| Rank | Motif                                                                               | P-value | % of Targets | % of Background | Best Match/Details (Match Score)                                                                                                       |
|------|-------------------------------------------------------------------------------------|---------|--------------|-----------------|----------------------------------------------------------------------------------------------------------------------------------------|
| 1    |    | 1e-329  | 61.19%       | 2.71%           | Atf4(bZIP)/MEF-Atf4-ChIP-Seq(GSE35681)/Homer(0.95)<br>Chop(bZIP)/MEF-Chop-ChIP-Seq(GSE35681)/Homer(0.95)<br>ATF4/MA0833.1/Jaspar(0.88) |
| 2    |    | 1e-21   | 39.01%       | 19.91%          | Nr2f6/MA0677.1/Jaspar(0.924)                                                                                                           |
| 3    |    | 1e-17   | 6.98%        | 0.96%           | PB0123.1_Foxl1_2/Jaspar(0.620)                                                                                                         |
| 4    |    | 1e-17   | 6.78%        | 0.94%           | Nanog(Homeobox)/mES-Nanog-ChIP-Seq(GSE11724)/Homer(0.686)                                                                              |
| 5    |    | 1e-16   | 5.54%        | 0.61%           | CEBPA/MA0102.3/Jaspar(0.913)                                                                                                           |
| 6    |    | 1e-15   | 3.90%        | 0.27%           | Sox2/MA0143.3/Jaspar(0.788)                                                                                                            |
| 7    |    | 1e-15   | 1.64%        | 0.01%           | Tcf7(HMG)/GM12878-TCF7-ChIP-Seq(Encode)/Homer(0.616)                                                                                   |
| 8    |    | 1e-13   | 19.71%       | 8.57%           | BATF(bZIP)/Th17-BATF-ChIP-Seq(GSE39756)/Homer(0.980)                                                                                   |
| 9    |    | 1e-12   | 6.78%        | 1.37%           | FXR(NR),IR1/Liver-FXR-ChIP-Seq(Chong_et_al.)/Homer(0.794)                                                                              |
| 10   |    | 1e-12   | 3.90%        | 0.41%           | Isl1(Homeobox)/Neuron-Isl1-ChIP-Seq(GSE31456)/Homer(0.688)                                                                             |
| 11 * |   | 1e-11   | 2.05%        | 0.07%           | PB0051.1_Osr2_1/Jaspar(0.648)                                                                                                          |
| 12 * |  | 1e-11   | 13.76%       | 5.36%           | Foxo3(Forkhead)/U2OS-Foxo3-ChIP-Seq(E-MTAB-2701)/Homer(0.821)                                                                          |
| 13 * |  | 1e-11   | 1.64%        | 0.03%           | Chop(bZIP)/MEF-Chop-ChIP-Seq(GSE35681)/Homer(0.674)                                                                                    |
| 14 * |  | 1e-11   | 1.64%        | 0.03%           | PB0109.1_Bbx_2/Jaspar(0.705)                                                                                                           |
| 15 * |  | 1e-10   | 12.53%       | 4.92%           | RAR:RXR(NR),DR5/ES-RAR-ChIP-Seq(GSE56893)/Homer(0.754)                                                                                 |

## (C) HOMER *de novo* Motif Results – ATF4 peaks (bortezomib treated)

Total target sequences = 6856

Total background sequences = 42868

| Rank | Motif                                                                               | P-value | % of Targets | % of Background | Best Match/Details (Match Score)                                                                                                       |
|------|-------------------------------------------------------------------------------------|---------|--------------|-----------------|----------------------------------------------------------------------------------------------------------------------------------------|
| 1    |    | 1e-5226 | 76.37%       | 4.99%           | Chop(bZIP)/MEF-Chop-ChIP-Seq(GSE35681)/Homer(0.98)<br>Atf4(bZIP)/MEF-Atf4-ChIP-Seq(GSE35681)/Homer(0.97)<br>ATF4/MA0833.1/Jaspar(0.89) |
| 2    |    | 1e-270  | 18.61%       | 6.15%           | Atf3(bZIP)/GBM-ATF3-ChIP-Seq(GSE33912)/Homer(0.994)                                                                                    |
| 3    |    | 1e-267  | 42.05%       | 22.98%          | CEBPB/MA0466.2/Jaspar(0.924)                                                                                                           |
| 4    |    | 1e-153  | 1.76%        | 0.04%           | JUN(var.2)/MA0489.1/Jaspar(0.668)                                                                                                      |
| 5    |    | 1e-98   | 1.55%        | 0.07%           | ISRE(IRF)/ThioMac-LPS-Expression(GSE23622)/Homer(0.759)                                                                                |
| 6    |    | 1e-88   | 5.63%        | 1.69%           | FOSL2/MA0478.1/Jaspar(0.672)                                                                                                           |
| 7    |    | 1e-83   | 1.24%        | 0.05%           | TEAD3(TEA)/HepG2-TEAD3-ChIP-Seq(Encode)/Homer(0.700)                                                                                   |
| 8    |    | 1e-81   | 12.62%       | 6.29%           | HNF4G/MA0484.1/Jaspar(0.943)                                                                                                           |
| 9    |    | 1e-77   | 1.47%        | 0.10%           | ZNF416(Zf)/HEK293-ZNF416.GFP-ChIP-Seq(GSE58341)/Homer(0.627)                                                                           |
| 10   |    | 1e-64   | 1.41%        | 0.13%           | STAT5(Stat)/mCD4+-Stat5-ChIP-Seq(GSE12346)/Homer(0.659)                                                                                |
| 11   |    | 1e-62   | 0.80%        | 0.02%           | BHLHE23/MA0817.1/Jaspar(0.620)                                                                                                         |
| 12   |   | 1e-60   | 0.89%        | 0.04%           | PB0022.1_Gata5_1/Jaspar(0.701)                                                                                                         |
| 13   |  | 1e-58   | 1.21%        | 0.10%           | Arid3a/MA0151.1/Jaspar(0.672)                                                                                                          |
| 14   |  | 1e-54   | 0.76%        | 0.03%           | PH0014.1_Cphx/Jaspar(0.653)                                                                                                            |
| 15   |  | 1e-51   | 0.73%        | 0.03%           | PB0195.1_Zbtb3_2/Jaspar(0.621)                                                                                                         |

## (D) HOMER Known Motif Results – TRIB3 peaks (bortezomib treated)

Total Target Sequences = 7635

Total Background Sequences = 42012

| Rank | Motif                                                                               | Name                                                    | P-value | % of Targets Sequences with Motif | % of Background Sequences with Motif |
|------|-------------------------------------------------------------------------------------|---------------------------------------------------------|---------|-----------------------------------|--------------------------------------|
| 1    |    | Atf4(bZIP)/MEF-Atf4-ChIP-Seq(GSE35681)/Homer            | 1e-3183 | 65.72%                            | 9.19%                                |
| 2    |    | Chop(bZIP)/MEF-Chop-ChIP-Seq(GSE35681)/Homer            | 1e-3132 | 60.92%                            | 7.44%                                |
| 3    |    | CEBP:AP1(bZIP)/ThioMac-CEBPb-ChIP-Seq(GSE21512)/Homer   | 1e-1940 | 73.82%                            | 22.78%                               |
| 4    |    | NFIL3(bZIP)/HepG2-NFIL3-ChIP-Seq(Encode)/Homer          | 1e-963  | 55.10%                            | 20.43%                               |
| 5    |    | HLF(bZIP)/HSC-HLF.Flag-ChIP-Seq(GSE69817)/Homer         | 1e-904  | 61.93%                            | 26.66%                               |
| 6    |    | Fra1(bZIP)/BT549-Fra1-ChIP-Seq(GSE46166)/Homer          | 1e-550  | 36.88%                            | 13.82%                               |
| 7    |    | Fra2(bZIP)/Striatum-Fra2-ChIP-Seq(GSE43429)/Homer       | 1e-550  | 32.94%                            | 11.28%                               |
| 8    |   | Fosl2(bZIP)/3T3L1-Fosl2-ChIP-Seq(GSE56872)/Homer        | 1e-537  | 25.63%                            | 7.18%                                |
| 9    |  | JunB(bZIP)/DendriticCells-Junb-ChIP-Seq(GSE36099)/Homer | 1e-537  | 36.02%                            | 13.45%                               |
| 10   |  | Atf3(bZIP)/GBM-ATF3-ChIP-Seq(GSE33912)/Homer            | 1e-511  | 39.96%                            | 16.60%                               |
| 11   |  | BATF(bZIP)/Th17-BATF-ChIP-Seq(GSE39756)/Homer           | 1e-493  | 39.19%                            | 16.37%                               |
| 12   |  | AP-1(bZIP)/ThioMac-PU.1-ChIP-Seq(GSE21512)/Homer        | 1e-477  | 41.64%                            | 18.46%                               |
| 13   |  | Jun-AP1(bZIP)/K562-cJun-ChIP-Seq(GSE31477)/Homer        | 1e-471  | 20.39%                            | 5.14%                                |
| 14   |  | Atf1(bZIP)/K562-ATF1-ChIP-Seq(GSE31477)/Homer           | 1e-261  | 39.20%                            | 21.68%                               |
| 15   |  | CEBP:CEBP(bZIP)/MEF-Chop-ChIP-Seq(GSE35681)/Homer       | 1e-259  | 16.49%                            | 5.51%                                |



## (E) HOMER Known Motif Results – TRIB3 peaks (untreated)

Total Target Sequences = 487

Total Background Sequences = 48863

| Rank | Motif                                                                               | Name                                                    | P-value | % of Targets Sequences with Motif | % of Background Sequences with Motif |
|------|-------------------------------------------------------------------------------------|---------------------------------------------------------|---------|-----------------------------------|--------------------------------------|
| 1    |    | Chop(bZIP)/MEF-Chop-ChIP-Seq(GSE35681)/Homer            | 1e-318  | 82.14%                            | 9.32%                                |
| 2    |    | Atf4(bZIP)/MEF-Atf4-ChIP-Seq(GSE35681)/Homer            | 1e-301  | 84.80%                            | 11.58%                               |
| 3    |    | CEBP:AP1(bZIP)/ThioMac-CEBPb-ChIP-Seq(GSE21512)/Homer   | 1e-180  | 89.12%                            | 27.27%                               |
| 4    |    | HLF(bZIP)/HSC-HLF.Flag-ChIP-Seq(GSE69817)/Homer         | 1e-81   | 73.31%                            | 30.97%                               |
| 5    |    | NFIL3(bZIP)/HepG2-NFIL3-ChIP-Seq(Encode)/Homer          | 1e-68   | 61.81%                            | 24.30%                               |
| 6    |    | PPARa(NR),DR1/Liver-Ppara-ChIP-Seq(GSE47954)/Homer      | 1e-14   | 50.31%                            | 32.82%                               |
| 7    |    | Jun-AP1(bZIP)/K562-cJun-ChIP-Seq(GSE31477)/Homer        | 1e-14   | 16.84%                            | 6.59%                                |
| 8    |    | HNF4a(NR),DR1/HepG2-HNF4a-ChIP-Seq(GSE25021)/Homer      | 1e-13   | 27.72%                            | 14.43%                               |
| 9    |   | Fosl2(bZIP)/3T3L1-Fosl2-ChIP-Seq(GSE56872)/Homer        | 1e-13   | 20.33%                            | 9.24%                                |
| 10   |  | CEBP:CEBP(bZIP)/MEF-Chop-ChIP-Seq(GSE35681)/Homer       | 1e-12   | 16.22%                            | 6.76%                                |
| 11   |  | GATA(Zf),IR3/iTreg-Gata3-ChIP-Seq(GSE20898)/Homer       | 1e-12   | 16.63%                            | 7.07%                                |
| 12   |  | Atf1(bZIP)/K562-ATF1-ChIP-Seq(GSE31477)/Homer           | 1e-12   | 43.12%                            | 28.09%                               |
| 13   |  | CEBP(bZIP)/ThioMac-CEBPb-ChIP-Seq(GSE21512)/Homer       | 1e-11   | 44.15%                            | 29.04%                               |
| 14   |  | JunB(bZIP)/DendriticCells-Junb-ChIP-Seq(GSE36099)/Homer | 1e-10   | 28.95%                            | 16.76%                               |
| 15   |  | Fra2(bZIP)/Striatum-Fra2-ChIP-Seq(GSE43429)/Homer       | 1e-10   | 25.87%                            | 14.41%                               |

## (F) HOMER Known Motif Results – ATF4 peaks (bortezomib treated)

Total Target Sequences = 6856

Total Background Sequences = 42881

| Rank | Motif                                                                               | Name                                                    | P-value | % of Targets Sequences with Motif | % of Background Sequences with Motif |
|------|-------------------------------------------------------------------------------------|---------------------------------------------------------|---------|-----------------------------------|--------------------------------------|
| 1    |    | Chop(bZIP)/MEF-Chop-ChIP-Seq(GSE35681)/Homer            | 1e-4647 | 79.65%                            | 7.63%                                |
| 2    |    | Atf4(bZIP)/MEF-Atf4-ChIP-Seq(GSE35681)/Homer            | 1e-4490 | 83.12%                            | 9.64%                                |
| 3    |    | CEBP:AP1(bZIP)/ThioMac-CEBPb-ChIP-Seq(GSE21512)/Homer   | 1e-2676 | 86.30%                            | 23.18%                               |
| 4    |    | NFIL3(bZIP)/HepG2-NFIL3-ChIP-Seq(Encode)/Homer          | 1e-1304 | 65.18%                            | 21.60%                               |
| 5    |    | HLF(bZIP)/HSC-HLF.Flag-ChIP-Seq(GSE69817)/Homer         | 1e-1279 | 72.71%                            | 28.00%                               |
| 6    |    | Atf1(bZIP)/K562-ATF1-ChIP-Seq(GSE31477)/Homer           | 1e-321  | 42.11%                            | 21.44%                               |
| 7    |    | Fra2(bZIP)/Striatum-Fra2-ChIP-Seq(GSE43429)/Homer       | 1e-281  | 26.44%                            | 10.86%                               |
| 8    |    | Fosl2(bZIP)/3T3L1-Fosl2-ChIP-Seq(GSE56872)/Homer        | 1e-270  | 19.59%                            | 6.72%                                |
| 9    |   | JunB(bZIP)/DendriticCells-Junb-ChIP-Seq(GSE36099)/Homer | 1e-261  | 29.04%                            | 13.11%                               |
| 10   |  | Fra1(bZIP)/BT549-Fra1-ChIP-Seq(GSE46166)/Homer          | 1e-259  | 29.67%                            | 13.61%                               |
| 11   |  | Jun-AP1(bZIP)/K562-cJun-ChIP-Seq(GSE31477)/Homer        | 1e-237  | 15.26%                            | 4.74%                                |
| 12   |  | Atf3(bZIP)/GBM-ATF3-ChIP-Seq(GSE33912)/Homer            | 1e-236  | 32.48%                            | 16.30%                               |
| 13   |  | BATF(bZIP)/Th17-BATF-ChIP-Seq(GSE39756)/Homer           | 1e-234  | 31.94%                            | 15.96%                               |
| 14   |  | AP-1(bZIP)/ThioMac-PU.1-ChIP-Seq(GSE21512)/Homer        | 1e-233  | 34.32%                            | 17.82%                               |
| 15   |  | GATA(Zf),IR3/iTreg-Gata3-ChIP-Seq(GSE20898)/Homer       | 1e-223  | 17.81%                            | 6.45%                                |
