# Supplementary material for: Pharmacological or TRIB3-Mediated Suppression of ATF4 Transcriptional Activity Promotes Hepatoma Cell Resistance to Proteasome Inhibitor Bortezomib
Source: Cancers (Basel). 2021 May 12;13(10):2341. doi: 10.3390/cancers13102341 (PMC8150958; doi:10.3390/cancers13102341)
Supplement: Supplementary file 1 [file cancers-13-02341-s001.zip]

Archive with 8 entries (8 files):
- Supplementary Figure S1.pdf
- Supplementary Figure S2.pdf
- Supplementary Figure S3.pdf
- Supplementary Table S1.xlsx
- Supplementary Table S2.xlsx
- Supplementary Table S3.pdf
- Supplementary Table S4.pdf
- Supplementary Text S1 - Supplementary Material Descriptions.pdf
