# Supplementary material for: Pharmacological or TRIB3-Mediated Suppression of ATF4 Transcriptional Activity Promotes Hepatoma Cell Resistance to Proteasome Inhibitor Bortezomib
Source: Cancers (Basel). 2021 May 12;13(10):2341. doi: 10.3390/cancers13102341 (PMC8150958; doi:10.3390/cancers13102341)
Supplement: Supplementary file 1 [file cancers-13-02341-s001.zip › Supplementary Table S1.xlsx]

## Sheet: Btz_vs_DMSO
geneID	geneName	baseMean	log2FoldChange	lfcSE	stat	pvalue	padj
ENSG00000204388	HSPA1B	5865.87	5.18028	0.105697	49.0108	0	0
ENSG00000204389	HSPA1A	14063.6	5.44914	0.120147	45.354	0	0
ENSG00000130066	SAT1	2919.84	2.76646	0.0661476	41.8226	0	0
ENSG00000151012	SLC7A11	1472.07	3.69985	0.0989393	37.3952	4.6805e-306	1.50958e-302
ENSG00000130513	GDF15	15042.2	4.5948	0.139592	32.9159	1.30337e-237	3.36295e-234
ENSG00000087074	PPP1R15A	728.356	5.00613	0.153012	32.7173	8.87185e-235	1.9076e-231
ENSG00000168209	DDIT4	641.381	3.41268	0.106595	32.0154	6.65614e-225	1.22673e-221
ENSG00000139112	GABARAPL1	422.617	4.96561	0.168671	29.4397	1.70471e-190	2.74906e-187
ENSG00000132002	DNAJB1	6468.99	3.13597	0.107859	29.0748	7.48737e-186	1.07327e-182
ENSG00000131711	MAP1B	950.114	3.26478	0.116401	28.0476	4.26752e-173	5.50553e-170
ENSG00000178381	ZFAND2A	2155.67	3.46615	0.124008	27.951	6.40675e-172	7.51395e-169
ENSG00000065911	MTHFD2	1414.66	2.445	0.09153	26.7126	3.36192e-157	3.61435e-154
ENSG00000131910	NR0B2	806.773	2.47742	0.0960394	25.7959	9.86909e-147	9.79394e-144
ENSG00000151694	ADAM17	963.616	2.01068	0.078057	25.7592	2.54542e-146	2.3456e-143
ENSG00000106105	GARS	1549.33	1.74747	0.0696205	25.0999	4.9818e-139	4.01689e-136
ENSG00000070669	ASNS	796.61	3.19966	0.127596	25.0765	8.96878e-139	6.80625e-136
ENSG00000163993	S100P	1067.09	3.14356	0.125557	25.037	2.41753e-138	1.7327e-135
ENSG00000115233	PSMD14	1300.47	1.81523	0.072674	24.9778	1.06636e-137	6.87853e-135
ENSG00000088826	SMOX	540.961	3.03808	0.121949	24.9127	5.41686e-137	3.32776e-134
ENSG00000164970	FAM219A	429.33	3.82898	0.154842	24.7283	5.31129e-135	3.11459e-132
ENSG00000173812	EIF1	5408.4	1.51619	0.062152	24.3949	1.93489e-131	1.0853e-128
ENSG00000130766	SESN2	1409.14	3.52558	0.147898	23.8379	1.35277e-125	7.27171e-123
ENSG00000080824	HSP90AA1	75468.2	1.84785	0.0778662	23.7312	1.71989e-124	8.87532e-122
ENSG00000106366	SERPINE1	1930.88	3.60738	0.152508	23.6537	1.08029e-123	5.36031e-121
ENSG00000177606	JUN	827.12	2.4088	0.102196	23.5705	7.74402e-123	3.70021e-120
ENSG00000150991	UBC	6624.97	2.9112	0.123682	23.5378	1.67463e-122	7.71584e-120
ENSG00000187134	AKR1C1	3046.74	2.48296	0.107153	23.1722	8.68346e-119	3.86294e-116
ENSG00000162772	ATF3	222.846	5.35878	0.231784	23.1197	2.93196e-118	1.26084e-115
ENSG00000120889	TNFRSF10B	1026.95	2.24381	0.0974993	23.0136	3.40779e-117	1.41819e-114
ENSG00000139514	SLC7A1	941.27	2.04758	0.0893532	22.9155	3.25175e-116	1.27124e-113
ENSG00000120694	HSPH1	8702.04	2.53069	0.113793	22.2394	1.42878e-109	5.26649e-107
ENSG00000013275	PSMC4	3597.63	1.96417	0.0883772	22.2248	1.97659e-109	7.08333e-107
ENSG00000173334	TRIB1	701.856	2.48363	0.112721	22.0335	1.37454e-107	4.79268e-105
ENSG00000161011	SQSTM1	3192.41	2.02374	0.093273	21.6969	2.19405e-104	7.07636e-102
ENSG00000067082	KLF6	821.611	2.55297	0.117993	21.6367	8.11725e-104	2.55416e-101
ENSG00000102393	GLA	315.066	2.26335	0.104951	21.5658	3.76186e-103	1.15552e-100
ENSG00000142168	SOD1	3066.33	1.19541	0.0566767	21.0917	9.47127e-99	2.77702e-96
ENSG00000101384	JAG1	688.395	1.99893	0.0954755	20.9366	2.48635e-97	7.12809e-95
ENSG00000182446	NPLOC4	772.739	2.0484	0.0981659	20.8667	1.07523e-96	3.01554e-94
ENSG00000135018	UBQLN1	1306.5	1.40709	0.0674817	20.8514	1.48138e-96	4.06623e-94
ENSG00000197746	PSAP	5614.15	2.07814	0.100202	20.7395	1.52657e-95	4.10298e-93
ENSG00000144224	UBXN4	3037.27	1.41782	0.0684354	20.7177	2.399e-95	6.31624e-93
ENSG00000260916	CCPG1	540.911	2.37025	0.114526	20.6961	3.75391e-95	9.68584e-93
ENSG00000101255	TRIB3	1224.87	2.35763	0.114618	20.5695	5.14964e-94	1.30266e-91
ENSG00000140941	MAP1LC3B	535.481	2.91403	0.142339	20.4725	3.78926e-93	9.22364e-91
ENSG00000128165	ADM2	214.523	3.40617	0.166562	20.4498	6.03112e-93	1.44088e-90
ENSG00000177169	ULK1	407.821	3.15173	0.154231	20.4351	8.15046e-93	1.9118e-90
ENSG00000124882	EREG	1207.49	3.47373	0.170427	20.3825	2.39228e-92	5.51121e-90
ENSG00000166986	MARS	1334.37	1.59269	0.0796501	19.9961	5.96101e-89	1.32591e-86
ENSG00000179134	SAMD4B	1039.81	2.28648	0.115136	19.8589	9.23261e-88	2.01881e-85
ENSG00000185627	PSMD13	828.043	1.63583	0.0827995	19.7566	7.04271e-87	1.5143e-84
ENSG00000119801	YPEL5	201.322	3.15976	0.160994	19.6266	9.16081e-86	1.93744e-83
ENSG00000127948	POR	1786.71	1.56069	0.0800184	19.5041	1.01369e-84	2.10929e-82
ENSG00000100439	ABHD4	190.154	3.36393	0.173278	19.4134	5.94015e-84	1.21641e-81
ENSG00000023909	GCLM	844.693	2.56627	0.132313	19.3954	8.4312e-84	1.69954e-81
ENSG00000176407	KCMF1	824.924	2.32746	0.120008	19.3941	8.65248e-84	1.71732e-81
ENSG00000134294	SLC38A2	2789.24	1.60484	0.0830888	19.3147	4.03694e-83	7.89099e-81
ENSG00000107372	ZFAND5	458.855	1.80428	0.0935684	19.283	7.46265e-83	1.43695e-80
ENSG00000188971	RP11-427H3.3	374.648	2.15151	0.112707	19.0894	3.09559e-81	5.78786e-79
ENSG00000177156	TALDO1	1523.61	1.71428	0.0906237	18.9164	8.35286e-80	1.49667e-77
ENSG00000008018	PSMB1	5258.16	2.53745	0.134812	18.8222	4.96791e-79	8.66094e-77
ENSG00000088833	NSFL1C	1163.28	1.82142	0.0968829	18.8002	7.5167e-79	1.29297e-76
ENSG00000152409	JMY	357.364	2.4522	0.130674	18.7658	1.43773e-78	2.44054e-76
ENSG00000198517	MAFK	818.823	2.25382	0.120595	18.6892	6.0628e-78	1.00277e-75
ENSG00000106211	HSPB1	2666.22	2.55643	0.137435	18.601	3.15384e-77	5.15035e-75
ENSG00000130164	LDLR	1507.82	2.16591	0.116704	18.559	6.89907e-77	1.11256e-74
ENSG00000135454	B4GALNT1	141.712	3.10101	0.169493	18.2958	8.93831e-75	1.38932e-72
ENSG00000104221	BRF2	182.668	2.62339	0.143783	18.2454	2.24952e-74	3.45488e-72
ENSG00000072682	P4HA2	353.716	2.35719	0.130032	18.1278	1.92319e-73	2.91895e-71
ENSG00000138448	ITGAV	660.984	1.57781	0.0883142	17.8659	2.17359e-71	3.22316e-69
ENSG00000198431	TXNRD1	2157.14	2.68288	0.150293	17.851	2.83757e-71	4.15994e-69
ENSG00000198363	ASPH	1660.09	1.55006	0.0872682	17.762	1.39174e-70	1.99499e-68
ENSG00000184014	DENND5A	258.681	1.9939	0.112309	17.7538	1.61178e-70	2.28501e-68
ENSG00000104695	PPP2CB	917.066	1.79194	0.101518	17.6515	9.91024e-70	1.3897e-67
ENSG00000116701	NCF2	199.588	5.85099	0.332586	17.5924	2.81515e-69	3.90519e-67
ENSG00000006652	IFRD1	316.216	2.46767	0.141077	17.4917	1.65755e-68	2.2749e-66
ENSG00000140575	IQGAP1	883.489	1.5036	0.0863471	17.4135	6.51855e-68	8.85219e-66
ENSG00000153317	ASAP1	652.059	1.5192	0.0884707	17.1718	4.31931e-66	5.74468e-64
ENSG00000113739	STC2	878.384	1.83108	0.107759	16.9924	9.35413e-65	1.19483e-62
ENSG00000105993	DNAJB6	533.867	1.54678	0.0919403	16.8237	1.63559e-63	2.04862e-61
ENSG00000136436	CALCOCO2	708.075	1.77536	0.105635	16.8066	2.18258e-63	2.70745e-61
ENSG00000124222	STX16	654.925	1.58616	0.0949947	16.6974	1.36952e-62	1.68268e-60
ENSG00000110619	CARS	485.045	1.93962	0.116412	16.6617	2.48713e-62	3.02703e-60
ENSG00000111371	SLC38A1	632.631	1.64882	0.0992288	16.6163	5.30826e-62	6.34091e-60
ENSG00000110172	CHORDC1	821.397	1.71088	0.103029	16.6057	6.33439e-62	7.49724e-60
ENSG00000189143	CLDN4	987.818	1.97108	0.119159	16.5415	1.84353e-61	2.16212e-59
ENSG00000104689	TNFRSF10A	611.58	1.86522	0.112804	16.5351	2.04934e-61	2.38186e-59
ENSG00000089916	GPATCH2L	324.493	1.8089	0.109655	16.4963	3.8993e-61	4.49151e-59
ENSG00000080031	PTPRH	209.347	3.33118	0.202083	16.4842	4.76452e-61	5.43956e-59
ENSG00000140961	OSGIN1	200.848	2.22298	0.134968	16.4704	5.98839e-61	6.77686e-59
ENSG00000171621	SPSB1	151.051	3.0566	0.186258	16.4105	1.60752e-60	1.78782e-58
ENSG00000151632	AKR1C2	1416.74	2.17931	0.133219	16.3588	3.76294e-60	4.1492e-58
ENSG00000108590	MED31	458.022	2.38999	0.146718	16.2898	1.16668e-59	1.25428e-57
ENSG00000028203	VEZT	504.442	1.86606	0.114708	16.2679	1.66662e-59	1.77695e-57
ENSG00000171903	CYP4F11	113.33	2.87576	0.176871	16.259	1.92735e-59	2.03809e-57
ENSG00000113194	FAF2	725.026	1.29344	0.0799116	16.1858	6.34926e-59	6.6595e-57
ENSG00000175166	PSMD2	1452.91	1.41148	0.0874935	16.1324	1.51078e-58	1.57182e-56
ENSG00000100664	EIF5	1706.71	1.14873	0.0713384	16.1026	2.44643e-58	2.52491e-56
ENSG00000146678	IGFBP1	773.984	5.02005	0.312318	16.0735	3.9113e-58	4.00474e-56
ENSG00000136830	FAM129B	508.688	1.30245	0.0810874	16.0623	4.69026e-58	4.7645e-56
ENSG00000160570	DEDD2	223.963	2.36771	0.148308	15.9648	2.24831e-57	2.26605e-55
ENSG00000185022	MAFF	279.657	2.50676	0.157506	15.9154	4.95882e-57	4.92106e-55
ENSG00000106397	PLOD3	794.035	1.1659	0.0734507	15.8732	9.71032e-57	9.49036e-55
ENSG00000127481	UBR4	1121.08	2.23401	0.141266	15.8142	2.48252e-56	2.37237e-54
ENSG00000175197	DDIT3	342.574	2.3932	0.151779	15.7676	5.19711e-56	4.93e-54
ENSG00000059728	MXD1	208.036	2.20465	0.139844	15.7651	5.4127e-56	5.09702e-54
ENSG00000156510	HKDC1	706.857	1.73729	0.110358	15.7423	7.75693e-56	7.25161e-54
ENSG00000166479	TMX3	265.814	1.78158	0.113227	15.7346	8.7638e-56	8.13394e-54
ENSG00000116717	GADD45A	362.026	2.27677	0.145639	15.633	4.34104e-55	3.9719e-53
ENSG00000149231	CCDC82	723.95	1.68982	0.108401	15.5887	8.69294e-55	7.84249e-53
ENSG00000130706	ADRM1	1789	1.32607	0.0854439	15.5198	2.54922e-54	2.2681e-52
ENSG00000023839	ABCC2	1376.69	1.55533	0.100556	15.4673	5.76671e-54	5.09564e-52
ENSG00000113811	SELK	793.525	1.87536	0.12129	15.4617	6.28864e-54	5.48174e-52
ENSG00000164877	MICALL2	145.598	4.01196	0.259966	15.4327	9.87038e-54	8.54616e-52
ENSG00000120129	DUSP1	158.365	3.86999	0.251489	15.3883	1.96047e-53	1.67497e-51
ENSG00000162616	DNAJB4	146.123	3.01268	0.196556	15.3273	5.02231e-53	4.26269e-51
ENSG00000084734	GCKR	245.031	2.88771	0.188568	15.3139	6.1762e-53	5.20779e-51
ENSG00000204178	TMEM57	625.858	1.42301	0.0930317	15.296	8.13147e-53	6.81195e-51
ENSG00000006453	BAIAP2L1	471.9	1.85433	0.121684	15.2389	1.95015e-52	1.61275e-50
ENSG00000106052	TAX1BP1	2355.7	1.40937	0.0926911	15.205	3.27447e-52	2.6907e-50
ENSG00000224032	EPB41L4A-AS1	478.383	1.75619	0.116217	15.1113	1.36408e-51	1.11379e-49
ENSG00000118496	FBXO30	174.064	2.304	0.153156	15.0435	3.80741e-51	3.08927e-49
ENSG00000132676	DAP3	505.977	1.43051	0.0952059	15.0254	5.00665e-51	4.03692e-49
ENSG00000130779	CLIP1	1279.67	1.4594	0.0972871	15.001	7.2374e-51	5.76356e-49
ENSG00000132471	WBP2	602.279	1.55247	0.103671	14.9749	1.07119e-50	8.47816e-49
ENSG00000167522	ANKRD11	3335.58	1.19716	0.0806128	14.8507	6.88137e-50	5.25305e-48
ENSG00000062716	VMP1	1239.74	1.37576	0.0929746	14.7972	1.52772e-49	1.15258e-47
ENSG00000197170	PSMD12	797.253	1.62587	0.109987	14.7825	1.90085e-49	1.42575e-47
ENSG00000242802	AP5Z1	737.844	2.23372	0.151122	14.7809	1.94405e-49	1.44972e-47
ENSG00000175416	CLTB	665.389	2.03341	0.138109	14.7232	4.57161e-49	3.37019e-47
ENSG00000120549	KIAA1217	204.063	1.85366	0.126183	14.6903	7.44174e-49	5.45488e-47
ENSG00000125826	RBCK1	2518.98	1.30301	0.0890924	14.6254	1.93375e-48	1.40153e-46
ENSG00000186594	MIR22HG	281.945	2.61672	0.179002	14.6184	2.14227e-48	1.54399e-46
ENSG00000151929	BAG3	1315.43	3.32229	0.229247	14.4922	1.35811e-47	9.57428e-46
ENSG00000115306	SPTBN1	5506.21	1.32237	0.0915874	14.4383	2.96907e-47	2.08174e-45
ENSG00000132740	IGHMBP2	124.705	2.47042	0.171925	14.3692	8.07204e-47	5.59878e-45
ENSG00000102034	ELF4	192.631	2.83432	0.198458	14.2817	2.84684e-46	1.96402e-44
ENSG00000101557	USP14	812.731	1.3158	0.092185	14.2735	3.19969e-46	2.1957e-44
ENSG00000115902	SLC1A4	527.898	1.63741	0.114855	14.2563	4.09349e-46	2.79419e-44
ENSG00000177410	ZFAS1	3024.06	1.98311	0.139115	14.2552	4.16112e-46	2.8254e-44
ENSG00000119760	SUPT7L	284.121	1.40906	0.0988706	14.2515	4.38697e-46	2.96315e-44
ENSG00000166224	SGPL1	744.697	1.54382	0.108376	14.245	4.8137e-46	3.23445e-44
ENSG00000134324	LPIN1	285.705	1.95428	0.137351	14.2284	6.11019e-46	4.08433e-44
ENSG00000159348	CYB5R1	226.111	1.81861	0.127933	14.2153	7.36344e-46	4.89669e-44
ENSG00000141458	NPC1	421.498	1.33473	0.0939563	14.2059	8.42504e-46	5.57392e-44
ENSG00000152527	PLEKHH2	154.273	3.21505	0.226399	14.2008	9.05152e-46	5.95784e-44
ENSG00000181045	SLC26A11	226.446	1.95497	0.138892	14.0755	5.3707e-45	3.48178e-43
ENSG00000173692	PSMD1	2966.17	1.19598	0.0852616	14.0271	1.06364e-44	6.82688e-43
ENSG00000008710	PKD1	198.201	2.39264	0.17149	13.9521	3.05617e-44	1.93273e-42
ENSG00000197063	MAFG	1280.15	1.89604	0.136043	13.937	3.77215e-44	2.37388e-42
ENSG00000050820	BCAR1	303.125	1.45	0.104289	13.9037	6.01261e-44	3.74728e-42
ENSG00000197165	SULT1A2	323.82	1.64241	0.118316	13.8815	8.19579e-44	5.08336e-42
ENSG00000125657	TNFSF9	77.4507	4.23224	0.305206	13.8668	1.00626e-43	6.21137e-42
ENSG00000057019	DCBLD2	1896.13	1.22885	0.0889656	13.8126	2.13855e-43	1.30139e-41
ENSG00000086061	DNAJA1	1704.04	1.01799	0.0737739	13.7988	2.5923e-43	1.57011e-41
ENSG00000162413	KLHL21	395.801	1.46344	0.106307	13.7661	4.07462e-43	2.45639e-41
ENSG00000116584	ARHGEF2	249.506	2.64429	0.192668	13.7246	7.23522e-43	4.30145e-41
ENSG00000128585	MKLN1	624.504	1.50162	0.109829	13.6724	1.48485e-42	8.78718e-41
ENSG00000120885	CLU	3072.18	1.60931	0.117712	13.6716	1.50072e-42	8.80899e-41
ENSG00000173530	TNFRSF10D	280.914	1.71825	0.126107	13.6253	2.83398e-42	1.6469e-40
ENSG00000251562	MALAT1	62769.3	1.99138	0.146165	13.6242	2.87506e-42	1.66228e-40
ENSG00000054523	KIF1B	826.799	1.37555	0.100966	13.6239	2.88621e-42	1.66228e-40
ENSG00000033100	CHPF2	222.861	1.75681	0.129398	13.5768	5.4973e-42	3.15203e-40
ENSG00000115310	RTN4	3871.92	0.921355	0.0679299	13.5633	6.60794e-42	3.73899e-40
ENSG00000013441	CLK1	310.606	1.69298	0.125155	13.5271	1.08259e-41	6.09888e-40
ENSG00000136802	LRRC8A	531.45	1.53486	0.113484	13.5249	1.11485e-41	6.25336e-40
ENSG00000168003	SLC3A2	3394.88	1.1919	0.0881463	13.5219	1.16212e-41	6.49027e-40
ENSG00000159377	PSMB4	1073.7	1.16179	0.0863135	13.4601	2.6849e-41	1.48025e-39
ENSG00000091592	NLRP1	264.828	2.75567	0.205501	13.4095	5.31772e-41	2.90695e-39
ENSG00000164171	ITGA2	496.338	1.71322	0.127798	13.4056	5.60318e-41	3.05007e-39
ENSG00000044115	CTNNA1	844.504	1.16942	0.0872673	13.4004	6.01345e-41	3.25965e-39
ENSG00000116761	CTH	113.54	3.62791	0.271793	13.348	1.21629e-40	6.56544e-39
ENSG00000170242	USP47	723.291	1.3701	0.10275	13.3342	1.46322e-40	7.86542e-39
ENSG00000052841	TTC17	327.627	1.66136	0.125173	13.2725	3.34079e-40	1.78097e-38
ENSG00000206503	HLA-A	1830.2	1.2368	0.0932763	13.2595	3.97494e-40	2.10167e-38
ENSG00000124145	SDC4	2245.43	1.017	0.0767741	13.2466	4.72074e-40	2.48581e-38
ENSG00000111897	SERINC1	761.026	1.83662	0.138825	13.2298	5.90562e-40	3.09709e-38
ENSG00000090013	BLVRB	241.165	1.82993	0.138451	13.2171	6.9875e-40	3.64962e-38
ENSG00000090020	SLC9A1	158.21	2.20291	0.167571	13.1461	1.79086e-39	9.24157e-38
ENSG00000204516	MICB	360.824	1.82088	0.13853	13.1443	1.83578e-39	9.43561e-38
ENSG00000196072	BLOC1S2	626.668	1.09658	0.0837698	13.0904	3.73578e-39	1.88263e-37
ENSG00000172216	CEBPB	465.608	2.40049	0.183644	13.0714	4.79584e-39	2.40744e-37
ENSG00000120438	TCP1	2729.24	1.05282	0.0806542	13.0535	6.06663e-39	3.03355e-37
ENSG00000122218	COPA	645.58	1.05228	0.0806492	13.0477	6.55369e-39	3.26445e-37
ENSG00000179833	SERTAD2	398.881	1.38944	0.106738	13.0172	9.76562e-39	4.82706e-37
ENSG00000198408	MGEA5	407.988	1.84625	0.142	13.0018	1.1955e-38	5.86429e-37
ENSG00000204520	MICA	223.124	1.56265	0.120491	12.969	1.8334e-38	8.95934e-37
ENSG00000037637	FBXO42	98.7164	2.14951	0.165781	12.966	1.90726e-38	9.25023e-37
ENSG00000100591	AHSA1	1997.1	1.5346	0.118387	12.9626	1.99439e-38	9.63657e-37
ENSG00000099814	CEP170B	500.185	1.7775	0.137214	12.9542	2.22351e-38	1.06242e-36
ENSG00000186591	UBE2H	409.947	1.48424	0.11472	12.938	2.7482e-38	1.29396e-36
ENSG00000163874	ZC3H12A	284.72	2.48969	0.194168	12.8223	1.22954e-37	5.70584e-36
ENSG00000158104	HPD	554.312	1.45318	0.113585	12.7938	1.77652e-37	8.21467e-36
ENSG00000072042	RDH11	892.334	0.99976	0.0781477	12.7932	1.78917e-37	8.2436e-36
ENSG00000139644	TMBIM6	4746.44	0.911501	0.0713271	12.7792	2.14351e-37	9.8062e-36
ENSG00000140297	GCNT3	279.15	1.58284	0.124107	12.7538	2.96884e-37	1.34389e-35
ENSG00000204387	C6orf48	917.325	1.30135	0.102066	12.7501	3.11335e-37	1.39463e-35
ENSG00000260032	LINC00657	1884.01	0.951675	0.0749045	12.7052	5.53419e-37	2.46195e-35
ENSG00000068308	OTUD5	270.403	1.56958	0.124332	12.6242	1.55399e-36	6.79593e-35
ENSG00000080815	PSEN1	433.527	1.17255	0.0928995	12.6217	1.60392e-36	6.99061e-35
ENSG00000139269	INHBE	578.749	1.40959	0.111769	12.6116	1.82145e-36	7.91197e-35
ENSG00000023287	RB1CC1	1045.75	1.71513	0.136135	12.5988	2.14417e-36	9.28252e-35
ENSG00000052749	RRP12	226.032	1.66929	0.132502	12.5982	2.16057e-36	9.32224e-35
ENSG00000130703	OSBPL2	301.733	1.39555	0.111278	12.5411	4.44787e-36	1.90638e-34
ENSG00000123352	SPATS2	261.714	1.40651	0.11245	12.5079	6.75997e-36	2.87823e-34
ENSG00000198380	GFPT1	835.977	1.02918	0.0823316	12.5004	7.42394e-36	3.1402e-34
ENSG00000115977	AAK1	342.265	2.12028	0.169821	12.4854	8.96891e-36	3.76899e-34
ENSG00000101150	TPD52L2	1493.04	1.10889	0.0890889	12.447	1.45177e-35	6.00297e-34
ENSG00000123983	ACSL3	2010.87	0.958767	0.0770371	12.4455	1.47914e-35	6.09659e-34
ENSG00000116661	FBXO2	593.236	1.42334	0.114838	12.3943	2.80501e-35	1.13086e-33
ENSG00000078246	TULP3	228.805	1.76707	0.142712	12.3821	3.26581e-35	1.30845e-33
ENSG00000131051	RBM39	3280.24	0.999696	0.0807654	12.3778	3.44787e-35	1.37712e-33
ENSG00000213190	MLLT11	46.9868	3.73221	0.303337	12.3038	8.63784e-35	3.40785e-33
ENSG00000157106	SMG1	369.264	1.51716	0.123336	12.301	8.94352e-35	3.51769e-33
ENSG00000114416	FXR1	1090.12	1.31401	0.10693	12.2885	1.04468e-34	4.09647e-33
ENSG00000234745	HLA-B	330.5	1.1675	0.0951812	12.266	1.37825e-34	5.3881e-33
ENSG00000171105	INSR	1248.93	1.756	0.143293	12.2546	1.5878e-34	6.18859e-33
ENSG00000157954	WIPI2	586.559	1.06767	0.0871942	12.2448	1.79186e-34	6.96289e-33
ENSG00000145495	MARCH6	608.2	1.12077	0.0918109	12.2074	2.83965e-34	1.09356e-32
ENSG00000120053	GOT1	792.46	1.19468	0.0980322	12.1866	3.66238e-34	1.40203e-32
ENSG00000175224	ATG13	437.343	1.46201	0.120079	12.1753	4.207e-34	1.60102e-32
ENSG00000100226	GTPBP1	253.44	1.41941	0.116714	12.1615	4.98585e-34	1.89184e-32
ENSG00000100345	MYH9	1508.73	0.992065	0.0815765	12.1612	5.0043e-34	1.89327e-32
ENSG00000165813	C10orf118	620.195	1.7499	0.144058	12.1472	5.93453e-34	2.23864e-32
ENSG00000144357	UBR3	228.791	1.66537	0.137563	12.1062	9.7914e-34	3.67206e-32
ENSG00000165280	VCP	2197.73	0.805034	0.0666555	12.0775	1.38833e-33	5.19154e-32
ENSG00000161217	PCYT1A	562.857	1.28102	0.106781	11.9968	3.69472e-33	1.3697e-31
ENSG00000149269	PAK1	259.187	1.3604	0.113866	11.9474	6.69849e-33	2.45503e-31
ENSG00000196365	LONP1	738.162	1.26437	0.106052	11.9222	9.07165e-33	3.30603e-31
ENSG00000148308	GTF3C5	292.189	1.52641	0.128193	11.9072	1.08565e-32	3.93427e-31
ENSG00000182704	TSKU	747.633	1.4906	0.125332	11.8933	1.28293e-32	4.63615e-31
ENSG00000171530	TBCA	3227.88	0.9035	0.0759822	11.8909	1.31926e-32	4.75413e-31
ENSG00000001084	GCLC	371.749	1.48742	0.125212	11.8792	1.51888e-32	5.45822e-31
ENSG00000164733	CTSB	2627.84	0.948339	0.0799189	11.8663	1.77199e-32	6.35012e-31
ENSG00000059145	UNKL	221.85	1.72201	0.145279	11.8531	2.07283e-32	7.40766e-31
ENSG00000162733	DDR2	76.3056	2.85196	0.240854	11.841	2.39527e-32	8.5363e-31
ENSG00000219481	NBPF1	369.653	1.47958	0.125403	11.7987	3.96612e-32	1.40183e-30
ENSG00000084234	APLP2	5657.46	1.0804	0.0916017	11.7946	4.16374e-32	1.46766e-30
ENSG00000113712	CSNK1A1	1623.18	0.99	0.0840498	11.7787	5.02438e-32	1.7614e-30
ENSG00000171988	JMJD1C	664.537	1.21452	0.103509	11.7335	8.58797e-32	2.98634e-30
ENSG00000121749	TBC1D15	148.843	1.7992	0.153496	11.7215	9.89271e-32	3.41246e-30
ENSG00000166340	TPP1	972.088	1.45315	0.124195	11.7005	1.26648e-31	4.32858e-30
ENSG00000096384	HSP90AB1	34125	1.33623	0.114337	11.6868	1.48914e-31	5.05564e-30
ENSG00000115762	PLEKHB2	950.632	1.03643	0.0887215	11.6818	1.57916e-31	5.33318e-30
ENSG00000128595	CALU	1728.05	1.04411	0.0895797	11.6557	2.14621e-31	7.19175e-30
ENSG00000105327	BBC3	331.858	2.0036	0.171988	11.6496	2.30513e-31	7.70427e-30
ENSG00000118217	ATF6	343.781	1.55464	0.134107	11.5926	4.49542e-31	1.49473e-29
ENSG00000113312	TTC1	675.56	1.14322	0.0986626	11.5872	4.78651e-31	1.58742e-29
ENSG00000124228	DDX27	2416.52	1.16549	0.100603	11.585	4.90882e-31	1.62381e-29
ENSG00000161202	DVL3	438.684	1.09476	0.0945262	11.5816	5.10978e-31	1.68597e-29
ENSG00000078369	GNB1	1374.18	0.782542	0.0675951	11.5769	5.39588e-31	1.77582e-29
ENSG00000261824	LINC00662	177.78	1.86889	0.16314	11.4557	2.20098e-30	7.13438e-29
ENSG00000143862	ARL8A	172.48	2.23212	0.195019	11.4457	2.47183e-30	7.99225e-29
ENSG00000054267	ARID4B	794.829	0.982761	0.0862668	11.3921	4.5773e-30	1.45807e-28
ENSG00000160200	CBS	735.886	1.78023	0.156345	11.3866	4.87643e-30	1.54953e-28
ENSG00000111846	GCNT2	448.123	1.22056	0.107232	11.3824	5.11689e-30	1.61797e-28
ENSG00000158195	WASF2	862.157	1.09225	0.096083	11.3678	6.04809e-30	1.90774e-28
ENSG00000099341	PSMD8	884.432	0.977166	0.0861746	11.3394	8.37454e-30	2.62233e-28
ENSG00000151914	DST	503.291	1.44575	0.128059	11.2897	1.47579e-29	4.57671e-28
ENSG00000119820	YIPF4	679.69	1.07427	0.0951816	11.2866	1.52901e-29	4.73039e-28
ENSG00000099917	MED15	326.903	1.29284	0.11467	11.2744	1.75558e-29	5.40542e-28
ENSG00000198804	MT-CO1	24936.4	1.30697	0.116037	11.2634	1.99033e-29	6.11362e-28
ENSG00000177479	ARIH2	786.056	1.02938	0.0915524	11.2436	2.49104e-29	7.63348e-28
ENSG00000185359	HGS	549.365	1.71396	0.152867	11.212	3.55873e-29	1.08794e-27
ENSG00000134684	YARS	607.931	1.04201	0.0929701	11.208	3.72375e-29	1.13302e-27
ENSG00000176845	METRNL	84.636	3.02033	0.269506	11.2069	3.77152e-29	1.14486e-27
ENSG00000070010	UFD1L	570.072	1.11698	0.099767	11.1959	4.27093e-29	1.29341e-27
ENSG00000101782	RIOK3	274.838	1.43903	0.128678	11.1832	4.92983e-29	1.48598e-27
ENSG00000170315	UBB	4211.61	1.18961	0.1064	11.1805	5.07837e-29	1.52718e-27
ENSG00000100596	SPTLC2	552.914	1.15172	0.103246	11.1551	6.76501e-29	2.02966e-27
ENSG00000149257	SERPINH1	405.401	2.04389	0.183483	11.1394	8.06399e-29	2.41377e-27
ENSG00000100991	TRPC4AP	568.239	1.04777	0.0940677	11.1385	8.14696e-29	2.43296e-27
ENSG00000104805	NUCB1	796.438	1.30748	0.117453	11.1319	8.77336e-29	2.61398e-27
ENSG00000141867	BRD4	3474.8	1.66588	0.149962	11.1087	1.13813e-28	3.36765e-27
ENSG00000141551	CSNK1D	647.487	0.89064	0.0802797	11.0942	1.33834e-28	3.942e-27
ENSG00000177105	RHOG	426.454	1.0442	0.0941673	11.0888	1.42203e-28	4.16001e-27
ENSG00000175793	SFN	1380.92	1.76826	0.16007	11.0468	2.27142e-28	6.62977e-27
ENSG00000101654	RNMT	350.618	1.26865	0.115122	11.02	3.06027e-28	8.87204e-27
ENSG00000091164	TXNL1	428.842	1.35623	0.123161	11.0118	3.35158e-28	9.69477e-27
ENSG00000164543	STK17A	364.532	1.42916	0.129806	11.01	3.41928e-28	9.86848e-27
ENSG00000115919	KYNU	625.355	2.51351	0.229394	10.9572	6.13928e-28	1.75616e-26
ENSG00000067334	DNTTIP2	881.077	1.10085	0.100568	10.9463	6.92141e-28	1.97115e-26
ENSG00000169155	ZBTB43	257.635	1.44026	0.131622	10.9424	7.22254e-28	2.05238e-26
ENSG00000164609	SLU7	926.331	1.17494	0.107419	10.9379	7.59216e-28	2.15267e-26
ENSG00000133398	MED10	305.969	1.21782	0.112016	10.8718	1.5699e-27	4.44152e-26
ENSG00000075785	RAB7A	1035.48	1.0575	0.0973912	10.8582	1.82255e-27	5.145e-26
ENSG00000144381	HSPD1	18293.6	1.14054	0.10522	10.8396	2.23471e-27	6.29476e-26
ENSG00000204160	ZDHHC18	182.409	1.56231	0.144151	10.838	2.27294e-27	6.38851e-26
ENSG00000170027	YWHAG	984.468	1.14255	0.105447	10.8353	2.34232e-27	6.56022e-26
ENSG00000033327	GAB2	106.368	2.17702	0.201032	10.8292	2.50248e-27	6.98797e-26
ENSG00000139988	RDH12	36.654	3.62068	0.334523	10.8234	2.66677e-27	7.43068e-26
ENSG00000106948	AKNA	109.205	2.24418	0.207431	10.8189	2.8007e-27	7.78702e-26
ENSG00000257704	PRR24	127.875	1.84633	0.170901	10.8035	3.31333e-27	9.17279e-26
ENSG00000105281	SLC1A5	974.335	1.19807	0.110959	10.7973	3.54339e-27	9.76779e-26
ENSG00000176915	ANKLE2	341.64	1.31964	0.122318	10.7886	3.8965e-27	1.07183e-25
ENSG00000138678	AGPAT9	215.355	1.81089	0.168257	10.7626	5.16666e-27	1.41518e-25
ENSG00000148841	ITPRIP	89.5508	3.17631	0.295466	10.7502	5.91579e-27	1.61352e-25
ENSG00000112237	CCNC	590.759	0.896177	0.0835542	10.7257	7.71023e-27	2.0941e-25
ENSG00000105821	DNAJC2	1296.48	1.10403	0.10307	10.7115	8.99042e-27	2.43156e-25
ENSG00000108588	CCDC47	613.067	0.977525	0.0912751	10.7097	9.16903e-27	2.47468e-25
ENSG00000086544	ITPKC	99.3995	1.94054	0.181579	10.687	1.17045e-26	3.15239e-25
ENSG00000128272	ATF4	3332.51	1.32629	0.124195	10.6791	1.27564e-26	3.42855e-25
ENSG00000105401	CDC37	1599.21	0.946955	0.0887034	10.6755	1.32507e-26	3.554e-25
ENSG00000086065	CHMP5	465.615	1.25008	0.117502	10.6389	1.96506e-26	5.22707e-25
ENSG00000126067	PSMB2	1035.44	1.63872	0.154062	10.6367	2.01112e-26	5.33856e-25
ENSG00000152952	PLOD2	870.537	1.59723	0.150238	10.6313	2.13021e-26	5.6431e-25
ENSG00000183597	TANGO2	120.222	1.76262	0.16618	10.6066	2.77547e-26	7.33735e-25
ENSG00000213923	CSNK1E	608.223	1.15856	0.109269	10.6028	2.89116e-26	7.62757e-25
ENSG00000133318	RTN3	725.643	0.929443	0.0876998	10.598	3.04392e-26	7.98163e-25
ENSG00000166401	SERPINB8	51.6058	3.71241	0.350401	10.5948	3.15147e-26	8.24688e-25
ENSG00000094975	SUCO	698.334	1.03686	0.0978772	10.5934	3.19656e-26	8.34793e-25
ENSG00000136813	KIAA0368	994.127	1.21283	0.114775	10.567	4.23743e-26	1.09994e-24
ENSG00000171608	PIK3CD	476.835	1.25542	0.119172	10.5345	5.98707e-26	1.54478e-24
ENSG00000162496	DHRS3	275.153	1.39063	0.1322	10.5192	7.04789e-26	1.81487e-24
ENSG00000108296	CWC25	303.355	1.06478	0.101338	10.5072	8.0044e-26	2.05707e-24
ENSG00000186432	KPNA4	658.098	1.22584	0.116771	10.4979	8.83642e-26	2.26188e-24
ENSG00000166471	TMEM41B	280.12	1.57386	0.150126	10.4836	1.02777e-25	2.61523e-24
ENSG00000132823	OSER1	242.811	1.27464	0.121612	10.4812	1.05419e-25	2.67719e-24
ENSG00000175592	FOSL1	132.207	2.52035	0.240484	10.4803	1.06374e-25	2.69614e-24
ENSG00000196235	SUPT5H	468.563	1.16605	0.111287	10.4778	1.09219e-25	2.76282e-24
ENSG00000041802	LSG1	519.023	1.22697	0.117299	10.4602	1.31628e-25	3.31667e-24
ENSG00000105856	HBP1	109.138	1.96288	0.188577	10.4089	2.25864e-25	5.64703e-24
ENSG00000116871	MAP7D1	201.052	1.42123	0.136937	10.3787	3.09866e-25	7.69995e-24
ENSG00000163347	CLDN1	601.078	0.843122	0.0812367	10.3786	3.10362e-25	7.69995e-24
ENSG00000108671	PSMD11	2978.79	1.49765	0.14432	10.3773	3.14581e-25	7.77474e-24
ENSG00000187531	SIRT7	431.929	1.37622	0.133139	10.3367	4.80612e-25	1.18328e-23
ENSG00000068878	PSME4	1166.01	0.972818	0.0943585	10.3098	6.363e-25	1.55178e-23
ENSG00000171224	C10orf35	51.9181	3.37657	0.327652	10.3053	6.66517e-25	1.6224e-23
ENSG00000124380	SNRNP27	1065.86	1.34587	0.13076	10.2927	7.604e-25	1.84397e-23
ENSG00000125977	EIF2S2	4569.29	0.814329	0.0792155	10.2799	8.67928e-25	2.09292e-23
ENSG00000137055	PLAA	122.343	1.58396	0.154462	10.2547	1.12745e-24	2.70358e-23
ENSG00000106070	GRB10	342.07	1.45208	0.141642	10.2517	1.16252e-24	2.78251e-23
ENSG00000168710	AHCYL1	1935.06	1.06317	0.103846	10.2379	1.34108e-24	3.20003e-23
ENSG00000120254	MTHFD1L	487.997	1.13788	0.111222	10.2307	1.44483e-24	3.43907e-23
ENSG00000174437	ATP2A2	1367.33	0.862334	0.084314	10.2276	1.49097e-24	3.54235e-23
ENSG00000135679	MDM2	1000.74	0.784947	0.0771126	10.1792	2.45488e-24	5.80043e-23
ENSG00000070540	WIPI1	169.838	1.63808	0.160971	10.1762	2.53192e-24	5.96065e-23
ENSG00000154265	ABCA5	437.091	1.18542	0.116496	10.1757	2.54674e-24	5.98461e-23
ENSG00000154781	CCDC174	319.638	1.32612	0.130397	10.1699	2.70264e-24	6.31644e-23
ENSG00000009830	POMT2	507.41	1.65215	0.162786	10.1492	3.33987e-24	7.74957e-23
ENSG00000113013	HSPA9	1447.64	0.972443	0.0965858	10.0682	7.63811e-24	1.73485e-22
ENSG00000126775	ATG14	183.062	1.61292	0.160231	10.0662	7.78966e-24	1.76616e-22
ENSG00000087263	OGFOD1	398.01	1.25509	0.124777	10.0586	8.41524e-24	1.90002e-22
ENSG00000144233	AMMECR1L	248.515	1.25807	0.125075	10.0585	8.42423e-24	1.90002e-22
ENSG00000182199	SHMT2	773.302	1.05019	0.10442	10.0573	8.52909e-24	1.91696e-22
ENSG00000140854	KATNB1	172.89	1.54536	0.153675	10.056	8.64186e-24	1.93893e-22
ENSG00000116161	CACYBP	1276.78	0.976577	0.0972126	10.0458	9.58761e-24	2.13626e-22
ENSG00000143384	MCL1	820.299	0.892376	0.0889422	10.0332	1.0891e-23	2.41417e-22
ENSG00000139637	C12orf10	262.242	1.14097	0.113817	10.0246	1.1884e-23	2.62978e-22
ENSG00000049449	RCN1	386.123	1.16035	0.116081	9.99603	1.58635e-23	3.4924e-22
ENSG00000108344	PSMD3	1669.77	1.327	0.132914	9.98385	1.7937e-23	3.94218e-22
ENSG00000167302	ENTHD2	294.097	1.59396	0.159855	9.97126	2.03624e-23	4.45247e-22
ENSG00000075413	MARK3	392.852	0.964656	0.0967663	9.96892	2.08479e-23	4.55091e-22
ENSG00000109065	NAT9	154.362	1.47151	0.147644	9.96657	2.13468e-23	4.65195e-22
ENSG00000114354	TFG	832.236	0.918678	0.0925198	9.92953	3.09725e-23	6.71557e-22
ENSG00000169213	RAB3B	151.092	1.71339	0.172721	9.92001	3.40713e-23	7.35039e-22
ENSG00000196924	FLNA	956.66	1.30841	0.132002	9.9121	3.68799e-23	7.94302e-22
ENSG00000067365	METTL22	129.539	1.94472	0.196206	9.91161	3.70638e-23	7.96934e-22
ENSG00000144136	SLC20A1	1345.02	0.70761	0.0714873	9.8984	4.22991e-23	9.0648e-22
ENSG00000135269	TES	413.242	1.40177	0.141774	9.88737	4.72274e-23	1.00874e-21
ENSG00000182208	MOB2	92.8983	1.87148	0.189286	9.88706	4.73716e-23	1.01015e-21
ENSG00000033030	ZCCHC8	141.367	1.4784	0.14959	9.88301	4.93271e-23	1.05011e-21
ENSG00000165113	GKAP1	197.76	1.35598	0.137684	9.84849	6.95834e-23	1.47405e-21
ENSG00000158769	F11R	716.895	1.06408	0.108231	9.83155	8.23383e-23	1.73854e-21
ENSG00000211445	GPX3	310.968	1.04005	0.106	9.8118	1.00167e-22	2.10465e-21
ENSG00000123933	MXD4	395.135	1.21341	0.123727	9.80722	1.04816e-22	2.19875e-21
ENSG00000074276	CDHR2	119.933	1.97352	0.201345	9.80172	1.10688e-22	2.31441e-21
ENSG00000173120	KDM2A	433.766	1.17844	0.120267	9.79851	1.14263e-22	2.38529e-21
ENSG00000084731	KIF3C	75.415	2.4399	0.249742	9.76965	1.51973e-22	3.14705e-21
ENSG00000113407	TARS	1294.27	0.816778	0.0836101	9.76889	1.53123e-22	3.16577e-21
ENSG00000070770	CSNK2A2	726.237	0.843675	0.0864119	9.76341	1.6162e-22	3.33609e-21
ENSG00000122203	KIAA1191	381.946	1.1544	0.118306	9.75778	1.70849e-22	3.51534e-21
ENSG00000272405	RP11-284F21.10	145.445	1.75221	0.179676	9.75204	1.80802e-22	3.71421e-21
ENSG00000172888	ZNF621	176.235	1.46834	0.150662	9.74589	1.92088e-22	3.93979e-21
ENSG00000115839	RAB3GAP1	456.166	0.926705	0.0950894	9.74562	1.92601e-22	3.94404e-21
ENSG00000135241	PNPLA8	199.008	1.59231	0.163595	9.73322	2.17587e-22	4.44864e-21
ENSG00000103335	PIEZO1	264.307	1.53504	0.157793	9.72819	2.28624e-22	4.65952e-21
ENSG00000017260	ATP2C1	246.582	1.2076	0.124179	9.72466	2.36695e-22	4.80882e-21
ENSG00000129518	EAPP	316.615	1.18578	0.122019	9.71797	2.52783e-22	5.11954e-21
ENSG00000142528	ZNF473	93.2887	1.98039	0.203984	9.70857	2.77199e-22	5.59647e-21
ENSG00000107937	GTPBP4	1026.48	0.833979	0.0859109	9.70749	2.80147e-22	5.64716e-21
ENSG00000204599	TRIM39	89.5442	1.74783	0.180168	9.70108	2.98325e-22	5.99484e-21
ENSG00000114796	KLHL24	73.4567	2.42672	0.250335	9.69389	3.20099e-22	6.41236e-21
ENSG00000100412	ACO2	444.311	1.02635	0.106106	9.6729	3.93072e-22	7.82564e-21
ENSG00000112308	C6orf62	434.471	1.0825	0.111958	9.66878	4.09245e-22	8.12258e-21
ENSG00000166046	TCP11L2	46.3024	3.01644	0.312345	9.6574	4.57339e-22	9.0216e-21
ENSG00000131871	VIMP	1049.16	0.890919	0.0928661	9.59359	8.50718e-22	1.65787e-20
ENSG00000141367	CLTC	3493.7	0.789201	0.0822689	9.59295	8.56013e-22	1.66568e-20
ENSG00000121931	LRIF1	515.097	0.948667	0.0989	9.59219	8.62355e-22	1.67549e-20
ENSG00000169490	TM2D2	361.706	1.33212	0.138917	9.58937	8.86231e-22	1.71929e-20
ENSG00000101132	PFDN4	1300.57	0.789228	0.0823113	9.58833	8.9524e-22	1.73416e-20
ENSG00000054967	RELT	81.828	1.92524	0.20089	9.58353	9.37831e-22	1.81394e-20
ENSG00000119599	DCAF4	198.883	1.33319	0.139325	9.56894	1.08003e-21	2.08273e-20
ENSG00000170265	ZNF282	302.763	1.47015	0.153753	9.56176	1.15771e-21	2.22256e-20
ENSG00000100258	LMF2	323.372	1.06034	0.110969	9.55528	1.23254e-21	2.35571e-20
ENSG00000107771	CCSER2	149.106	1.32221	0.138378	9.55506	1.23509e-21	2.35709e-20
ENSG00000100519	PSMC6	456.038	1.06244	0.111275	9.54791	1.3234e-21	2.51817e-20
ENSG00000087086	FTL	36320.8	0.753602	0.0790059	9.53855	1.44844e-21	2.75204e-20
ENSG00000040487	PQLC2	163.234	1.44684	0.151886	9.52583	1.6373e-21	3.1063e-20
ENSG00000126214	KLC1	260.899	1.19675	0.125702	9.5206	1.72183e-21	3.26188e-20
ENSG00000153714	LURAP1L	43.2109	2.90133	0.304897	9.51579	1.80334e-21	3.40627e-20
ENSG00000155304	HSPA13	215.142	1.40286	0.147479	9.5123	1.86492e-21	3.51231e-20
ENSG00000130340	SNX9	164.245	1.84107	0.193588	9.51024	1.90225e-21	3.57698e-20
ENSG00000104687	GSR	1165.31	1.32004	0.13883	9.50829	1.93826e-21	3.62924e-20
ENSG00000156860	FBRS	412.226	1.46743	0.154374	9.50564	1.98825e-21	3.71746e-20
ENSG00000137876	RSL24D1	591.788	1.26778	0.133514	9.49551	2.19137e-21	4.08539e-20
ENSG00000113732	ATP6V0E1	1125.83	0.726439	0.076574	9.48675	2.3835e-21	4.42439e-20
ENSG00000072778	ACADVL	901.095	1.18211	0.124615	9.48616	2.39702e-21	4.4431e-20
ENSG00000198786	MT-ND5	37694	1.15045	0.121443	9.47318	2.71454e-21	5.01723e-20
ENSG00000175203	DCTN2	507.505	1.09413	0.115677	9.45852	3.12345e-21	5.7483e-20
ENSG00000163512	AZI2	246.076	1.27634	0.13517	9.44244	3.64206e-21	6.6932e-20
ENSG00000137285	TUBB2B	45.5214	3.70934	0.392906	9.44078	3.70008e-21	6.78051e-20
ENSG00000168066	SF1	1189	0.869342	0.0922708	9.42164	4.44107e-21	8.10385e-20
ENSG00000140497	SCAMP2	823.939	1.23213	0.130913	9.4118	4.87725e-21	8.8872e-20
ENSG00000197961	ZNF121	486.492	0.935734	0.0994963	9.40471	5.21731e-21	9.49345e-20
ENSG00000101182	PSMA7	6247.92	0.704002	0.0749992	9.3868	6.18507e-21	1.1207e-19
ENSG00000099875	MKNK2	824.505	1.00036	0.106687	9.37656	6.81589e-21	1.23154e-19
ENSG00000197324	LRP10	103.306	1.65281	0.176919	9.34218	9.43696e-21	1.69563e-19
ENSG00000173273	TNKS	186.558	1.23982	0.132756	9.3391	9.71591e-21	1.74332e-19
ENSG00000100528	CNIH1	769.74	0.909859	0.0977004	9.31275	1.24565e-20	2.22578e-19
ENSG00000198899	MT-ATP6	239833	0.978785	0.105121	9.31098	1.26653e-20	2.25915e-19
ENSG00000162783	IER5	209.818	1.77243	0.190466	9.30571	1.33097e-20	2.36513e-19
ENSG00000154144	TBRG1	310.902	1.03397	0.111661	9.25991	2.04612e-20	3.59632e-19
ENSG00000059122	FLYWCH1	78.2397	1.70752	0.184409	9.25943	2.05531e-20	3.60755e-19
ENSG00000170606	HSPA4	1625.97	0.733595	0.0793062	9.25017	2.24142e-20	3.92888e-19
ENSG00000198938	MT-CO3	195025	0.911293	0.0985722	9.24493	2.35404e-20	4.1207e-19
ENSG00000070495	JMJD6	319.327	0.973577	0.105329	9.24322	2.39198e-20	4.17577e-19
ENSG00000140199	SLC12A6	123.585	2.02162	0.219111	9.22645	2.79759e-20	4.85757e-19
ENSG00000011132	APBA3	203.185	1.3124	0.142422	9.21481	3.1182e-20	5.39249e-19
ENSG00000003393	ALS2	141.503	1.5045	0.163431	9.20574	3.39335e-20	5.86046e-19
ENSG00000105443	CYTH2	114.771	1.80289	0.195943	9.2011	3.54292e-20	6.10242e-19
ENSG00000120709	FAM53C	249.62	0.981079	0.106948	9.17341	4.58295e-20	7.87278e-19
ENSG00000187840	EIF4EBP1	164.667	1.51555	0.165355	9.16539	4.93688e-20	8.46951e-19
ENSG00000196517	SLC6A9	71.0068	2.56288	0.280627	9.1327	6.68131e-20	1.14166e-18
ENSG00000196352	CD55	146.115	1.66977	0.183018	9.12351	7.27268e-20	1.23943e-18
ENSG00000150776	C11orf57	568.671	0.993585	0.10901	9.11463	7.8938e-20	1.34351e-18
ENSG00000130270	ATP8B3	151.768	1.56157	0.171543	9.10313	8.77659e-20	1.48983e-18
ENSG00000085563	ABCB1	1236.07	0.99056	0.108855	9.09985	9.04556e-20	1.53347e-18
ENSG00000171867	PRNP	848.171	0.988106	0.108646	9.09476	9.47989e-20	1.60499e-18
ENSG00000155975	VPS37A	127.087	1.51465	0.166657	9.08844	1.00467e-19	1.69649e-18
ENSG00000124226	RNF114	619.203	0.794526	0.087467	9.08373	1.04918e-19	1.76934e-18
ENSG00000105357	MYH14	197.969	1.28942	0.142023	9.07896	1.09612e-19	1.8461e-18
ENSG00000196954	CASP4	328.682	1.12561	0.124134	9.06767	1.21592e-19	2.03987e-18
ENSG00000198763	MT-ND2	164790	1.43872	0.158845	9.05739	1.33604e-19	2.22978e-18
ENSG00000105372	RPS19	16491.6	0.684674	0.0756301	9.05292	1.39194e-19	2.32008e-18
ENSG00000080371	RAB21	371.462	1.09088	0.120656	9.04127	1.54855e-19	2.57116e-18
ENSG00000138107	ACTR1A	434.402	0.982359	0.108726	9.03514	1.63797e-19	2.71263e-18
ENSG00000109111	SUPT6H	672.281	0.789267	0.0875155	9.0186	1.90515e-19	3.13499e-18
ENSG00000103353	UBFD1	223.815	1.5541	0.172941	8.98632	2.55654e-19	4.16965e-18
ENSG00000136021	SCYL2	423.877	0.952312	0.105987	8.98513	2.58419e-19	4.20942e-18
ENSG00000198886	MT-ND4	319429	1.2629	0.140929	8.96125	3.21032e-19	5.20961e-18
ENSG00000117614	SYF2	489.779	1.01561	0.113362	8.95898	3.27709e-19	5.31127e-18
ENSG00000127511	SIN3B	217.281	1.37659	0.153662	8.95857	3.28902e-19	5.32393e-18
ENSG00000011451	WIZ	237.759	1.30132	0.145276	8.9576	3.31813e-19	5.36431e-18
ENSG00000128891	C15orf57	145.913	1.41254	0.157959	8.94247	3.80569e-19	6.12948e-18
ENSG00000164068	RNF123	377.381	1.11804	0.125092	8.93772	3.97285e-19	6.39075e-18
ENSG00000035862	TIMP2	105.306	1.98798	0.222433	8.93745	3.98256e-19	6.39838e-18
ENSG00000142910	TINAGL1	619.256	1.02514	0.114768	8.93223	4.17503e-19	6.68263e-18
ENSG00000093167	LRRFIP2	266.799	1.23134	0.137993	8.92325	4.52784e-19	7.2119e-18
ENSG00000130827	PLXNA3	127.339	2.05665	0.230536	8.92116	4.61425e-19	7.34013e-18
ENSG00000137601	NEK1	283.467	0.969043	0.108644	8.91947	4.68545e-19	7.44422e-18
ENSG00000130449	ZSWIM6	66.6399	2.29451	0.257587	8.90772	5.20922e-19	8.22572e-18
ENSG00000060982	BCAT1	218.628	1.26431	0.141962	8.90597	5.29218e-19	8.34651e-18
ENSG00000221914	PPP2R2A	587.263	0.877217	0.0988678	8.87262	7.14433e-19	1.11991e-17
ENSG00000077150	NFKB2	125.912	1.53003	0.172865	8.85099	8.67469e-19	1.34997e-17
ENSG00000129933	MAU2	256.574	1.12344	0.126985	8.84701	8.98984e-19	1.39733e-17
ENSG00000069956	MAPK6	623.345	0.878428	0.0992961	8.84655	9.02686e-19	1.40139e-17
ENSG00000188706	ZDHHC9	891.697	0.914965	0.103462	8.8435	9.27625e-19	1.43838e-17
ENSG00000240682	ISY1	425.176	1.17055	0.132434	8.83873	9.68091e-19	1.49752e-17
ENSG00000076043	REXO2	459.114	0.964063	0.109089	8.83736	9.8004e-19	1.51419e-17
ENSG00000155252	PI4K2A	131.985	1.4574	0.165106	8.82706	1.07459e-18	1.65631e-17
ENSG00000157693	C9orf91	82.7672	1.7711	0.200701	8.82456	1.09887e-18	1.6897e-17
ENSG00000159322	ADPGK	233.598	1.27019	0.143955	8.82349	1.10942e-18	1.70388e-17
ENSG00000012660	ELOVL5	550.411	0.999669	0.113515	8.8065	1.29117e-18	1.97597e-17
ENSG00000133872	TMEM66	970.119	1.15927	0.131703	8.80214	1.34234e-18	2.05184e-17
ENSG00000162191	UBXN1	400.555	1.0719	0.121795	8.80087	1.35765e-18	2.07278e-17
ENSG00000083444	PLOD1	560.433	1.00868	0.114686	8.79519	1.4281e-18	2.1752e-17
ENSG00000122257	RBBP6	2181.8	0.986224	0.112157	8.79328	1.45258e-18	2.20987e-17
ENSG00000163960	UBXN7	424.516	0.88952	0.101228	8.78731	1.53185e-18	2.32772e-17
ENSG00000127022	CANX	8624.34	0.758378	0.0863495	8.78265	1.59663e-18	2.42045e-17
ENSG00000127824	TUBA4A	32.5826	3.82843	0.436123	8.77833	1.65923e-18	2.51241e-17
ENSG00000126012	KDM5C	354.223	1.46101	0.166449	8.77752	1.67112e-18	2.52745e-17
ENSG00000161179	YDJC	259.498	1.23568	0.141243	8.7486	2.16012e-18	3.23291e-17
ENSG00000174953	DHX36	870.225	0.66102	0.0756426	8.73873	2.35746e-18	3.51196e-17
ENSG00000136930	PSMB7	1466.5	0.958297	0.1097	8.73558	2.42408e-18	3.60704e-17
ENSG00000107796	ACTA2	334.772	1.42458	0.163114	8.73363	2.46627e-18	3.66559e-17
ENSG00000005700	IBTK	521.42	0.821322	0.0943795	8.70233	3.2513e-18	4.79921e-17
ENSG00000164463	CREBRF	102.593	1.69197	0.194568	8.69603	3.43702e-18	5.06754e-17
ENSG00000186529	CYP4F3	180.725	1.3389	0.154246	8.68028	3.94812e-18	5.78146e-17
ENSG00000072364	AFF4	490.248	1.02161	0.117911	8.66426	4.54441e-18	6.64711e-17
ENSG00000139116	KIF21A	1474.39	0.912619	0.105376	8.66058	4.6937e-18	6.85769e-17
ENSG00000198840	MT-ND3	168922	0.939937	0.10863	8.65263	5.03261e-18	7.34454e-17
ENSG00000084623	EIF3I	1138.2	0.86763	0.100306	8.64986	5.15618e-18	7.51638e-17
ENSG00000112245	PTP4A1	3044.39	0.795703	0.0920159	8.64746	5.26588e-18	7.65897e-17
ENSG00000169016	E2F6	389.644	1.09234	0.126444	8.6389	5.67586e-18	8.24598e-17
ENSG00000055483	USP36	730.848	1.12087	0.129814	8.63442	5.90269e-18	8.56587e-17
ENSG00000182087	TMEM259	813.599	0.949455	0.110014	8.63028	6.12023e-18	8.87158e-17
ENSG00000148248	SURF4	2132.31	0.558492	0.0648472	8.61243	7.15277e-18	1.03451e-16
ENSG00000166900	STX3	288.657	1.06426	0.123592	8.61104	7.24038e-18	1.046e-16
ENSG00000158480	SPATA2	263.115	1.11201	0.129413	8.59275	8.49128e-18	1.22261e-16
ENSG00000006194	ZNF263	146.757	1.24495	0.14506	8.58226	9.30272e-18	1.33349e-16
ENSG00000091490	SEL1L3	30.4732	3.54534	0.413288	8.57839	9.62143e-18	1.37765e-16
ENSG00000109220	CHIC2	76.2181	2.17812	0.25433	8.56415	1.08874e-17	1.55718e-16
ENSG00000114742	WDR48	181.5	1.22589	0.143195	8.56094	1.11952e-17	1.59944e-16
ENSG00000182372	CLN8	191.401	1.04229	0.121993	8.54383	1.29844e-17	1.84891e-16
ENSG00000140105	WARS	324.148	0.971318	0.113843	8.53208	1.43744e-17	2.04458e-16
ENSG00000109046	WSB1	1127.21	1.0876	0.127735	8.51451	1.67291e-17	2.37216e-16
ENSG00000101181	MTG2	295.906	1.00194	0.117842	8.50242	1.85672e-17	2.62648e-16
ENSG00000084733	RAB10	1018.35	0.980778	0.115403	8.49869	1.91744e-17	2.70941e-16
ENSG00000163113	OTUD7B	157.417	1.33055	0.156594	8.49682	1.9485e-17	2.75028e-16
ENSG00000197102	DYNC1H1	3252.06	1.30271	0.15342	8.49115	2.04598e-17	2.88157e-16
ENSG00000110700	RPS13	3884.9	0.664637	0.0783033	8.48798	2.10258e-17	2.95806e-16
ENSG00000131981	LGALS3	184.056	1.40796	0.165976	8.48287	2.19697e-17	3.08077e-16
ENSG00000024048	UBR2	235.627	0.930642	0.109746	8.47996	2.25269e-17	3.15547e-16
ENSG00000154380	ENAH	1495.98	0.808071	0.0954659	8.4645	2.57251e-17	3.59176e-16
ENSG00000100139	MICALL1	172.155	1.3167	0.155693	8.45703	2.7428e-17	3.82539e-16
ENSG00000102226	USP11	265.603	1.01165	0.119693	8.45204	2.86245e-17	3.98796e-16
ENSG00000092445	TYRO3	104.492	1.36014	0.160931	8.45171	2.87072e-17	3.99489e-16
ENSG00000165732	DDX21	5061.49	0.583435	0.069037	8.45104	2.88721e-17	4.00514e-16
ENSG00000117360	PRPF3	302.887	1.12555	0.133302	8.44364	3.07607e-17	4.25798e-16
ENSG00000146830	GIGYF1	219.919	1.53269	0.181539	8.44273	3.10002e-17	4.28654e-16
ENSG00000114120	SLC25A36	345.586	0.987236	0.117094	8.43117	3.42213e-17	4.70169e-16
ENSG00000124788	ATXN1	182.509	1.18371	0.140411	8.43033	3.44694e-17	4.73074e-16
ENSG00000179562	GCC1	252.179	1.26332	0.14988	8.42886	3.49061e-17	4.78559e-16
ENSG00000255150	EID3	35.4131	4.93739	0.586463	8.41893	3.79941e-17	5.1869e-16
ENSG00000197622	CDC42SE1	225.299	1.48312	0.176663	8.39522	4.65017e-17	6.34164e-16
ENSG00000073008	PVR	786.518	0.810407	0.0967677	8.37477	5.5332e-17	7.52993e-16
ENSG00000163798	SLC4A1AP	612.992	0.813281	0.0971335	8.37282	5.6255e-17	7.63943e-16
ENSG00000136758	YME1L1	440.164	0.808056	0.0965551	8.36886	5.81803e-17	7.88428e-16
ENSG00000184205	TSPYL2	125.854	1.51561	0.181259	8.36155	6.1899e-17	8.37065e-16
ENSG00000197142	ACSL5	577.44	0.865837	0.103592	8.35814	6.37137e-17	8.60702e-16
ENSG00000177731	FLII	318.694	0.889223	0.106438	8.35437	6.57843e-17	8.87744e-16
ENSG00000090861	AARS	832.42	0.755418	0.0904321	8.35343	6.63088e-17	8.93886e-16
ENSG00000007168	PAFAH1B1	416.782	0.845189	0.10131	8.34258	7.26841e-17	9.77636e-16
ENSG00000068745	IP6K2	454.72	0.842545	0.100995	8.34248	7.27487e-17	9.77636e-16
ENSG00000116675	DNAJC6	39.8116	2.51948	0.303398	8.3042	1.00493e-16	1.34487e-15
ENSG00000113851	CRBN	136.606	1.2001	0.144733	8.29183	1.11523e-16	1.4894e-15
ENSG00000111667	USP5	218.538	1.20625	0.145487	8.29115	1.1216e-16	1.49636e-15
ENSG00000147854	UHRF2	154.751	1.26883	0.15304	8.29083	1.12458e-16	1.49879e-15
ENSG00000058866	DGKG	53.4468	1.89788	0.229298	8.27691	1.26411e-16	1.67781e-15
ENSG00000116754	SRSF11	4270.31	0.753436	0.0910624	8.27384	1.29709e-16	1.71981e-15
ENSG00000105176	URI1	831.625	0.663016	0.0801563	8.27154	1.32241e-16	1.75158e-15
ENSG00000185896	LAMP1	2110.25	0.66054	0.0798965	8.26745	1.36851e-16	1.81079e-15
ENSG00000100814	CCNB1IP1	225.675	1.10388	0.133576	8.264	1.40865e-16	1.86198e-15
ENSG00000198727	MT-CYB	135023	1.13772	0.137806	8.25597	1.50677e-16	1.98153e-15
ENSG00000178607	ERN1	119.074	1.7087	0.207242	8.24495	1.65228e-16	2.17068e-15
ENSG00000132824	SERINC3	832.473	0.832594	0.101093	8.23589	1.78223e-16	2.33665e-15
ENSG00000130723	PRRC2B	540.731	0.840455	0.102142	8.22829	1.8991e-16	2.48481e-15
ENSG00000137076	TLN1	885.448	1.17531	0.142926	8.22322	1.9811e-16	2.58948e-15
ENSG00000133773	CCDC59	772.675	0.716093	0.0871389	8.21784	2.07209e-16	2.70294e-15
ENSG00000100263	RHBDD3	88.5533	1.31438	0.160012	8.21427	2.13451e-16	2.78155e-15
ENSG00000173110	HSPA6	235.261	8.6478	1.05323	8.21077	2.19767e-16	2.8552e-15
ENSG00000054598	FOXC1	154.571	1.50939	0.18394	8.20587	2.28929e-16	2.97124e-15
ENSG00000165678	GHITM	1031.73	1.05643	0.12885	8.1989	2.42596e-16	3.1423e-15
ENSG00000135720	DYNC1LI2	1069.23	0.872504	0.10644	8.19714	2.46183e-16	3.18557e-15
ENSG00000106993	CDC37L1	144.429	1.41732	0.172973	8.19385	2.52999e-16	3.27048e-15
ENSG00000221978	CCNL2	752.321	1.21646	0.14848	8.19276	2.55296e-16	3.29687e-15
ENSG00000175155	YPEL2	60.1503	2.25335	0.275199	8.18806	2.6547e-16	3.42482e-15
ENSG00000125107	CNOT1	749.594	0.898787	0.109846	8.18227	2.78553e-16	3.58286e-15
ENSG00000106636	YKT6	843.074	0.793266	0.0969762	8.18001	2.83829e-16	3.64346e-15
ENSG00000168439	STIP1	896.607	0.989586	0.121116	8.17055	3.0698e-16	3.92891e-15
ENSG00000215251	FASTKD5	742.429	1.02895	0.125966	8.16845	3.12369e-16	3.99392e-15
ENSG00000173209	AHSA2	296.676	1.28437	0.157263	8.16705	3.16026e-16	4.03669e-15
ENSG00000090615	GOLGA3	462.404	1.03047	0.126533	8.14387	3.82827e-16	4.86108e-15
ENSG00000078618	NRD1	770.702	1.00668	0.123625	8.14302	3.85526e-16	4.89053e-15
ENSG00000136068	FLNB	812.446	0.804576	0.098975	8.12909	4.32532e-16	5.46532e-15
ENSG00000125967	NECAB3	113.537	1.21505	0.149509	8.12698	4.40103e-16	5.54816e-15
ENSG00000196182	STK40	327.749	0.964889	0.118869	8.11726	4.76842e-16	6.00169e-15
ENSG00000115649	CNPPD1	438.272	1.14936	0.141632	8.11516	4.85151e-16	6.10032e-15
ENSG00000132510	KDM6B	153.26	1.25752	0.154983	8.11397	4.89942e-16	6.15457e-15
ENSG00000196998	WDR45	71.6906	1.63336	0.201395	8.11025	5.05151e-16	6.33945e-15
ENSG00000141480	ARRB2	927.473	0.975248	0.120286	8.10775	5.15643e-16	6.46483e-15
ENSG00000074695	LMAN1	3909.45	0.724136	0.0893156	8.10761	5.16248e-16	6.46614e-15
ENSG00000148926	ADM	144.671	1.49288	0.184161	8.10637	5.21535e-16	6.52602e-15
ENSG00000164615	CAMLG	359.763	0.946071	0.116782	8.10119	5.44245e-16	6.80359e-15
ENSG00000242372	EIF6	2337.52	0.816937	0.100907	8.09598	5.68068e-16	7.07399e-15
ENSG00000095752	IL11	103.539	8.38337	1.03666	8.08689	6.12068e-16	7.59259e-15
ENSG00000186166	CCDC84	303.996	1.161	0.143657	8.08174	6.38468e-16	7.91247e-15
ENSG00000160058	BSDC1	327.838	1.37453	0.17015	8.07838	6.56315e-16	8.11805e-15
ENSG00000103035	PSMD7	1156.06	0.696713	0.0862528	8.07757	6.60678e-16	8.15637e-15
ENSG00000100401	RANGAP1	570.662	0.939934	0.116483	8.0693	7.07017e-16	8.7201e-15
ENSG00000076826	CAMSAP3	313.382	1.18959	0.147604	8.05931	7.67294e-16	9.44547e-15
ENSG00000172602	RND1	51.0455	2.19269	0.272139	8.05725	7.80306e-16	9.5965e-15
ENSG00000030582	GRN	986.458	1.05225	0.130608	8.05657	7.8462e-16	9.64036e-15
ENSG00000079805	DNM2	523.273	0.935701	0.116298	8.04572	8.57367e-16	1.04942e-14
ENSG00000114988	LMAN2L	296.312	0.97551	0.121298	8.04225	8.8206e-16	1.0776e-14
ENSG00000101544	ADNP2	417	0.835178	0.103856	8.0417	8.85991e-16	1.08138e-14
ENSG00000160223	ICOSLG	193.816	1.29077	0.160553	8.03952	9.01905e-16	1.09976e-14
ENSG00000147050	KDM6A	84.6968	1.60336	0.199494	8.03714	9.19618e-16	1.1203e-14
ENSG00000101216	GMEB2	271.928	1.19319	0.148499	8.03503	9.35579e-16	1.13867e-14
ENSG00000172775	FAM192A	381.124	0.921641	0.114936	8.01875	1.0683e-15	1.29531e-14
ENSG00000114770	ABCC5	204.899	1.21842	0.15209	8.01115	1.13638e-15	1.37528e-14
ENSG00000140743	CDR2	214.939	1.33225	0.166414	8.00567	1.18822e-15	1.43666e-14
ENSG00000166200	COPS2	441.01	0.852756	0.106635	7.99694	1.27551e-15	1.53932e-14
ENSG00000129083	COPB1	642.248	0.635362	0.0795241	7.98956	1.35425e-15	1.6313e-14
ENSG00000099246	RAB18	439.982	0.815637	0.102246	7.97724	1.49647e-15	1.80093e-14
ENSG00000008517	IL32	1202.47	1.08581	0.136251	7.96919	1.59716e-15	1.91853e-14
ENSG00000105136	ZNF419	101.405	1.52053	0.191075	7.95778	1.7516e-15	2.09624e-14
ENSG00000167543	TP53I13	204.839	0.962937	0.121079	7.95298	1.82075e-15	2.17495e-14
ENSG00000198712	MT-CO2	166137	0.853436	0.107359	7.9494	1.87418e-15	2.23464e-14
ENSG00000198625	MDM4	282.556	1.15209	0.145027	7.94399	1.95775e-15	2.32997e-14
ENSG00000066697	MSANTD3	121.731	1.49444	0.188371	7.93345	2.13137e-15	2.52496e-14
ENSG00000140465	CYP1A1	1099.58	1.31092	0.165317	7.92975	2.19595e-15	2.59669e-14
ENSG00000089289	IGBP1	313.301	0.966857	0.121984	7.92608	2.26176e-15	2.67207e-14
ENSG00000031698	SARS	598.845	1.01136	0.127641	7.9235	2.30919e-15	2.7256e-14
ENSG00000116285	ERRFI1	266.845	1.0114	0.127728	7.91842	2.40545e-15	2.82373e-14
ENSG00000196792	STRN3	754.776	0.847155	0.106987	7.91829	2.40795e-15	2.82408e-14
ENSG00000122965	RBM19	308.057	1.02144	0.129158	7.90843	2.6066e-15	3.04048e-14
ENSG00000120708	TGFBI	1053.71	0.803189	0.101631	7.90297	2.72344e-15	3.17104e-14
ENSG00000113504	SLC12A7	434.114	1.15126	0.145739	7.89949	2.80043e-15	3.25774e-14
ENSG00000133112	TPT1	14257.5	0.824831	0.104429	7.89847	2.82349e-15	3.27831e-14
ENSG00000197756	RPL37A	34575.3	0.825436	0.104507	7.89837	2.82573e-15	3.27831e-14
ENSG00000025156	HSF2	260.934	1.07265	0.135902	7.89278	2.95539e-15	3.42565e-14
ENSG00000179335	CLK3	179.006	1.25543	0.159167	7.88749	3.08325e-15	3.57065e-14
ENSG00000119707	RBM25	3810.79	0.738576	0.0939008	7.86549	3.67667e-15	4.23885e-14
ENSG00000110906	KCTD10	208.249	1.13258	0.14409	7.86023	3.83429e-15	4.41662e-14
ENSG00000052344	PRSS8	23.5809	4.64714	0.591811	7.85241	4.08128e-15	4.68023e-14
ENSG00000166233	ARIH1	285.934	1.08658	0.138595	7.84002	4.50491e-15	5.15686e-14
ENSG00000110851	PRDM4	156.133	1.20598	0.154085	7.8267	5.00826e-15	5.70773e-14
ENSG00000104756	KCTD9	150.063	1.25126	0.159895	7.82552	5.05572e-15	5.75674e-14
ENSG00000067560	RHOA	1683.13	0.527481	0.0674607	7.81908	5.32088e-15	6.05332e-14
ENSG00000116260	QSOX1	59.8214	1.91077	0.244409	7.81791	5.37095e-15	6.1049e-14
ENSG00000117682	DHDDS	121.08	1.26839	0.16228	7.81604	5.45108e-15	6.19052e-14
ENSG00000143614	GATAD2B	252.573	1.00671	0.128857	7.8126	5.60221e-15	6.35098e-14
ENSG00000136536	MARCH7	344.796	0.899525	0.115188	7.80917	5.75655e-15	6.52021e-14
ENSG00000147364	FBXO25	885.403	0.892126	0.114259	7.80792	5.81382e-15	6.57353e-14
ENSG00000163636	PSMD6	436.01	1.73102	0.22183	7.80337	6.02745e-15	6.79722e-14
ENSG00000135919	SERPINE2	100.887	1.94474	0.249562	7.79259	6.56474e-15	7.3902e-14
ENSG00000173230	GOLGB1	2070.97	0.90847	0.116593	7.7918	6.60593e-15	7.43008e-14
ENSG00000023902	PLEKHO1	161.385	1.21964	0.156539	7.79126	6.63428e-15	7.45548e-14
ENSG00000138069	RAB1A	1363.06	0.704577	0.0904372	7.79079	6.65914e-15	7.4769e-14
ENSG00000134871	COL4A2	79.2308	1.37846	0.177007	7.78757	6.83085e-15	7.65637e-14
ENSG00000115904	SOS1	793.846	0.866712	0.11144	7.77739	7.40366e-15	8.26967e-14
ENSG00000064313	TAF2	337.464	0.961248	0.123645	7.77423	7.59056e-15	8.46377e-14
ENSG00000102595	UGGT2	223.691	0.905948	0.116749	7.75978	8.50789e-15	9.47025e-14
ENSG00000143878	RHOB	714.008	0.660459	0.08516	7.75551	8.79901e-15	9.76062e-14
ENSG00000127993	RBM48	66.7497	1.66477	0.214969	7.74425	9.61476e-15	1.06199e-13
ENSG00000162231	NXF1	257.369	1.07531	0.138976	7.73742	1.01458e-14	1.11969e-13
ENSG00000198888	MT-ND1	91410.1	1.58426	0.20508	7.72511	1.11757e-14	1.23229e-13
ENSG00000121940	CLCC1	251.997	0.875407	0.113668	7.70141	1.34575e-14	1.47884e-13
ENSG00000121274	PAPD5	718.449	0.964594	0.125288	7.699	1.3714e-14	1.50574e-13
ENSG00000138760	SCARB2	352.906	0.766888	0.0996689	7.69436	1.42207e-14	1.55739e-13
ENSG00000090061	CCNK	218.219	0.867851	0.112819	7.69246	1.44337e-14	1.57938e-13
ENSG00000135049	AGTPBP1	115.439	1.34393	0.175249	7.66869	1.73769e-14	1.8918e-13
ENSG00000152684	PELO	124.204	1.25101	0.163305	7.66061	1.85048e-14	2.00952e-13
ENSG00000130522	JUND	590.412	1.06951	0.139676	7.65706	1.90231e-14	2.0606e-13
ENSG00000158158	CNNM4	108.343	1.48542	0.19415	7.65087	1.99623e-14	2.1569e-13
ENSG00000160049	DFFA	712.46	0.881523	0.115289	7.64622	2.0697e-14	2.23441e-13
ENSG00000124762	CDKN1A	452.868	0.896196	0.117254	7.64318	2.11918e-14	2.28591e-13
ENSG00000033178	UBA6	572.775	0.705573	0.0924469	7.63219	2.30799e-14	2.47922e-13
ENSG00000055044	NOP58	2855.31	0.733751	0.0961421	7.63194	2.31242e-14	2.4819e-13
ENSG00000134363	FST	93.4247	1.47122	0.192972	7.62404	2.45862e-14	2.63225e-13
ENSG00000104946	TBC1D17	74.2285	1.59761	0.20959	7.62254	2.48739e-14	2.66085e-13
ENSG00000111711	GOLT1B	234.183	1.12246	0.147497	7.61006	2.73978e-14	2.91874e-13
ENSG00000124486	USP9X	462.731	0.770302	0.101375	7.59851	2.99555e-14	3.18071e-13
ENSG00000197594	ENPP1	335.085	0.936613	0.123313	7.5954	3.06837e-14	3.25535e-13
ENSG00000100380	ST13	1090.69	0.766011	0.101105	7.57635	3.55406e-14	3.76444e-13
ENSG00000188976	NOC2L	312.441	0.935182	0.123607	7.56579	3.85518e-14	4.07335e-13
ENSG00000141568	FOXK2	666.221	0.999142	0.13214	7.56123	3.99277e-14	4.21183e-13
ENSG00000259976	RP11-553L6.5	121.694	1.47194	0.194812	7.5557	4.16629e-14	4.39128e-13
ENSG00000166173	LARP6	43.7002	2.51943	0.333528	7.55386	4.22548e-14	4.45004e-13
ENSG00000162929	KIAA1841	240.682	0.993056	0.131796	7.53478	4.89176e-14	5.13496e-13
ENSG00000131236	CAP1	1092.96	0.57123	0.0758264	7.5334	4.94364e-14	5.18519e-13
ENSG00000187109	NAP1L1	4006.39	0.490925	0.0652008	7.52944	5.09595e-14	5.34061e-13
ENSG00000165626	BEND7	232.974	1.21374	0.161216	7.52866	5.12624e-14	5.36799e-13
ENSG00000100284	TOM1	204.03	1.09277	0.145171	7.52747	5.17311e-14	5.41268e-13
ENSG00000160326	SLC2A6	260.329	1.10333	0.146756	7.51812	5.55707e-14	5.8003e-13
ENSG00000079393	DUSP13	15.9253	3.49683	0.465662	7.50937	5.94134e-14	6.18638e-13
ENSG00000085831	TTC39A	27.6763	2.54638	0.339367	7.5033	6.22288e-14	6.46388e-13
ENSG00000172273	HINFP	50.9654	1.6681	0.222519	7.49644	6.55757e-14	6.80058e-13
ENSG00000091009	RBM27	763.447	0.697707	0.0930941	7.49464	6.6481e-14	6.88892e-13
ENSG00000179943	FIZ1	93.7631	1.40774	0.187844	7.4942	6.6703e-14	6.90638e-13
ENSG00000164535	DAGLB	128.574	1.25493	0.16749	7.49258	6.75347e-14	6.98689e-13
ENSG00000099949	LZTR1	173.132	1.1413	0.152358	7.49091	6.83956e-14	7.07029e-13
ENSG00000197860	SGTB	46.7678	2.22725	0.297413	7.48875	6.95336e-14	7.18217e-13
ENSG00000198171	DDRGK1	935.238	0.689904	0.0922578	7.478	7.54623e-14	7.78832e-13
ENSG00000108551	RASD1	33.4715	3.26804	0.437299	7.47325	7.82404e-14	8.06213e-13
ENSG00000135048	TMEM2	915.6	1.05793	0.141588	7.47189	7.90499e-14	8.13905e-13
ENSG00000073614	KDM5A	762.047	0.813391	0.108898	7.46928	8.06332e-14	8.28884e-13
ENSG00000112208	BAG2	291.102	0.951281	0.127365	7.46891	8.08641e-14	8.30596e-13
ENSG00000101266	CSNK2A1	1299.1	0.607642	0.0813991	7.46497	8.33185e-14	8.54445e-13
ENSG00000142669	SH3BGRL3	225.563	1.20837	0.161955	7.46114	8.57767e-14	8.77562e-13
ENSG00000163807	KIAA1143	339.807	0.827668	0.110982	7.45771	8.80408e-14	8.99299e-13
ENSG00000101199	ARFGAP1	576.111	1.02797	0.138003	7.44888	9.41367e-14	9.57774e-13
ENSG00000064932	SBNO2	288.347	1.05952	0.14261	7.42953	1.08985e-13	1.10362e-12
ENSG00000105053	VRK3	243.205	0.961785	0.129468	7.42877	1.09616e-13	1.10914e-12
ENSG00000151726	ACSL1	142.131	1.35061	0.182125	7.41581	1.20881e-13	1.22121e-12
ENSG00000131018	SYNE1	104.858	1.57913	0.212954	7.41534	1.21313e-13	1.22462e-12
ENSG00000173226	IQCB1	105.651	1.33725	0.180543	7.40685	1.29336e-13	1.30153e-12
ENSG00000138207	RBP4	2504.13	0.538872	0.0727734	7.4048	1.3135e-13	1.32077e-12
ENSG00000135974	C2orf49	239.123	0.931833	0.125997	7.39567	1.40697e-13	1.40599e-12
ENSG00000104643	MTMR9	131.535	1.09379	0.148262	7.37741	1.61399e-13	1.60541e-12
ENSG00000213699	SLC35F6	499.727	0.849588	0.115195	7.37522	1.64073e-13	1.63074e-12
ENSG00000172738	TMEM217	22.2358	3.50798	0.47567	7.37483	1.64551e-13	1.63423e-12
ENSG00000162032	SPSB3	84.8619	1.58907	0.215586	7.37093	1.6944e-13	1.68021e-12
ENSG00000167723	TRPV3	23.8525	7.85544	1.0659	7.36978	1.70914e-13	1.69352e-12
ENSG00000129071	MBD4	688.984	0.684616	0.0929122	7.36842	1.72663e-13	1.70954e-12
ENSG00000107223	EDF1	1238.41	0.637515	0.086553	7.3656	1.76357e-13	1.74478e-12
ENSG00000084636	COL16A1	135.248	1.50958	0.204967	7.36498	1.77178e-13	1.75155e-12
ENSG00000205531	NAP1L4	2005.52	0.72491	0.0984308	7.36467	1.77587e-13	1.75425e-12
ENSG00000106853	PTGR1	163.11	1.22782	0.166891	7.357	1.88082e-13	1.85508e-12
ENSG00000122884	P4HA1	400.958	0.906295	0.123341	7.34785	2.01415e-13	1.97656e-12
ENSG00000196504	PRPF40A	3610.86	0.446942	0.0608265	7.34782	2.01471e-13	1.97656e-12
ENSG00000182831	C16orf72	180.972	1.25638	0.171135	7.34148	2.11241e-13	2.06769e-12
ENSG00000157181	C1orf27	304.622	0.973382	0.132689	7.33584	2.20341e-13	2.15513e-12
ENSG00000158747	NBL1	221.422	1.24484	0.169727	7.33435	2.22797e-13	2.1775e-12
ENSG00000162642	C1orf52	115.444	1.15441	0.157422	7.33324	2.24647e-13	2.19392e-12
ENSG00000184060	ADAP2	66.584	1.86238	0.254186	7.32684	2.35644e-13	2.29785e-12
ENSG00000130487	KLHDC7B	20.5832	7.87013	1.07418	7.32666	2.35956e-13	2.29915e-12
ENSG00000149480	MTA2	542.923	1.03208	0.14112	7.31347	2.6033e-13	2.53281e-12
ENSG00000147872	PLIN2	2638.96	0.816683	0.111794	7.30524	2.76772e-13	2.68469e-12
ENSG00000161813	LARP4	387.774	0.714352	0.0978287	7.30207	2.83374e-13	2.74666e-12
ENSG00000115484	CCT4	2449.67	0.928269	0.12717	7.29943	2.88984e-13	2.79683e-12
ENSG00000177425	PAWR	557.322	0.785742	0.107684	7.29676	2.94781e-13	2.85081e-12
ENSG00000083312	TNPO1	1076.96	0.810364	0.111197	7.28761	3.15502e-13	3.04663e-12
ENSG00000138433	CIR1	612.296	0.871578	0.119605	7.28712	3.16655e-13	3.05547e-12
ENSG00000164266	SPINK1	337.498	1.08851	0.149396	7.28606	3.1916e-13	3.07734e-12
ENSG00000126432	PRDX5	645.112	1.06954	0.146853	7.28308	3.26292e-13	3.14011e-12
ENSG00000141682	PMAIP1	37.7226	2.28178	0.313301	7.28303	3.26414e-13	3.14011e-12
ENSG00000125651	GTF2F1	324.307	0.756373	0.103971	7.27487	3.46766e-13	3.32365e-12
ENSG00000136643	RPS6KC1	133.817	1.23807	0.170276	7.27092	3.57041e-13	3.41959e-12
ENSG00000102287	GABRE	98.4342	1.72577	0.237656	7.26163	3.82462e-13	3.65763e-12
ENSG00000115274	INO80B	126.068	1.42158	0.195802	7.2603	3.86242e-13	3.69104e-12
ENSG00000204525	HLA-C	393.253	1.09754	0.151323	7.25297	4.07735e-13	3.89067e-12
ENSG00000135506	OS9	770.663	0.630854	0.0870842	7.24418	4.35052e-13	4.14214e-12
ENSG00000159592	GPBP1L1	357.871	0.885071	0.122257	7.2394	4.50676e-13	4.28458e-12
ENSG00000147905	ZCCHC7	180.17	1.0468	0.144816	7.22847	4.88459e-13	4.63014e-12
ENSG00000183696	UPP1	114.85	1.31963	0.182565	7.22827	4.89197e-13	4.63033e-12
ENSG00000130985	UBA1	976.004	0.915729	0.126756	7.22434	5.03524e-13	4.76244e-12
ENSG00000060138	YBX3	786.47	0.674025	0.0933606	7.21959	5.21453e-13	4.9284e-12
ENSG00000120158	RCL1	288.125	1.10169	0.152796	7.21021	5.58676e-13	5.26093e-12
ENSG00000090273	NUDC	737.965	0.724786	0.100574	7.20651	5.7403e-13	5.39606e-12
ENSG00000095787	WAC	1008.32	0.638409	0.0885885	7.20645	5.7428e-13	5.39606e-12
ENSG00000175387	SMAD2	325.834	0.815343	0.113147	7.20607	5.75909e-13	5.40743e-12
ENSG00000104880	ARHGEF18	217.132	0.978044	0.135795	7.20237	5.91744e-13	5.55206e-12
ENSG00000004534	RBM6	462.365	1.14307	0.158859	7.19554	6.22142e-13	5.82879e-12
ENSG00000033867	SLC4A7	603.704	0.682568	0.0949676	7.18737	6.60502e-13	6.17474e-12
ENSG00000173744	AGFG1	885.655	0.625892	0.0870899	7.18674	6.63578e-13	6.19617e-12
ENSG00000121064	SCPEP1	77.2659	1.76587	0.245714	7.1867	6.63755e-13	6.19617e-12
ENSG00000159658	EFCAB14	339.48	1.01581	0.141355	7.18621	6.66144e-13	6.20948e-12
ENSG00000121848	RNF115	419.212	0.845903	0.117753	7.1837	6.78507e-13	6.3156e-12
ENSG00000235899	RP11-345L23.1	15.4475	5.63991	0.785871	7.17663	7.14498e-13	6.64102e-12
ENSG00000257923	CUX1	485.075	0.848257	0.118246	7.17365	7.30268e-13	6.78271e-12
ENSG00000103042	SLC38A7	145.891	1.09658	0.152985	7.16793	7.61388e-13	7.06667e-12
ENSG00000089693	MLF2	1121.75	1.05744	0.147575	7.16544	7.75353e-13	7.19111e-12
ENSG00000149187	CELF1	1682.69	0.53802	0.0750924	7.16478	7.79134e-13	7.22099e-12
ENSG00000009307	CSDE1	3103.82	0.528127	0.0737284	7.16314	7.88508e-13	7.30261e-12
ENSG00000092203	TOX4	493.776	0.764693	0.106817	7.15894	8.13036e-13	7.50284e-12
ENSG00000166037	CEP57	540.032	0.710172	0.0993047	7.15145	8.58649e-13	7.9181e-12
ENSG00000187164	KIAA1598	472.235	0.829949	0.116172	7.14415	9.05546e-13	8.32736e-12
ENSG00000078747	ITCH	209.824	0.931517	0.130389	7.14414	9.05611e-13	8.32736e-12
ENSG00000170445	HARS	220.066	0.975996	0.136629	7.14338	9.10625e-13	8.3675e-12
ENSG00000077147	TM9SF3	1836.63	0.539946	0.0756182	7.14043	9.30397e-13	8.5431e-12
ENSG00000185104	FAF1	439.625	0.730961	0.102412	7.13748	9.50582e-13	8.72223e-12
ENSG00000136628	EPRS	1200.18	0.628064	0.0880244	7.13511	9.67073e-13	8.86724e-12
ENSG00000077380	DYNC1I2	1503.96	0.814561	0.114235	7.13057	9.99538e-13	9.13246e-12
ENSG00000139318	DUSP6	414.919	0.847787	0.119061	7.12063	1.07437e-12	9.78846e-12
ENSG00000139842	CUL4A	392.027	0.684667	0.0965634	7.09034	1.33781e-12	1.21201e-11
ENSG00000046651	OFD1	331.54	0.93397	0.131873	7.08236	1.41719e-12	1.28303e-11
ENSG00000154370	TRIM11	562.405	1.07596	0.152026	7.07747	1.46809e-12	1.32725e-11
ENSG00000081019	RSBN1	204.777	1.07981	0.152585	7.07676	1.47562e-12	1.33296e-11
ENSG00000168522	FNTA	297.142	0.906096	0.128219	7.06679	1.58562e-12	1.4295e-11
ENSG00000130589	HELZ2	239.025	1.06737	0.151058	7.06595	1.59526e-12	1.43719e-11
ENSG00000181026	AEN	630.933	0.837016	0.118568	7.05938	1.67244e-12	1.50566e-11
ENSG00000149488	TMC2	9.8657	7.77188	1.10128	7.05712	1.69994e-12	1.52935e-11
ENSG00000116786	PLEKHM2	177.667	1.02537	0.145308	7.05651	1.70737e-12	1.53497e-11
ENSG00000139725	RHOF	284.676	1.08554	0.153941	7.05168	1.7677e-12	1.58699e-11
ENSG00000137575	SDCBP	414.441	1.11499	0.158304	7.04337	1.87639e-12	1.68106e-11
ENSG00000171425	ZNF581	115.398	1.11973	0.159325	7.028	2.09521e-12	1.87061e-11
ENSG00000188522	FAM83G	204.098	1.04625	0.149013	7.02122	2.1994e-12	1.95821e-11
ENSG00000147535	PPAPDC1B	282.192	0.734151	0.104565	7.02102	2.20252e-12	1.95963e-11
ENSG00000152894	PTPRK	412.346	0.764102	0.108873	7.01829	2.24593e-12	1.99688e-11
ENSG00000186020	ZNF529	45.9626	1.91288	0.272568	7.018	2.25065e-12	1.9997e-11
ENSG00000263711	RP11-169F17.1	112.504	1.25356	0.178704	7.01476	2.30348e-12	2.04523e-11
ENSG00000115548	KDM3A	179.544	1.15818	0.165278	7.00748	2.4265e-12	2.15146e-11
ENSG00000188786	MTF1	155.11	1.22028	0.174142	7.00739	2.42813e-12	2.15146e-11
ENSG00000144802	NFKBIZ	117.008	1.17516	0.167774	7.00444	2.47978e-12	2.19421e-11
ENSG00000166887	VPS39	85.3019	1.28921	0.184176	6.99988	2.56182e-12	2.26526e-11
ENSG00000161091	MFSD12	454.357	1.00367	0.143481	6.99514	2.65001e-12	2.34003e-11
ENSG00000064545	TMEM161A	240.612	0.922853	0.131984	6.99215	2.70712e-12	2.38556e-11
ENSG00000116793	PHTF1	130.583	1.31231	0.187941	6.98256	2.89839e-12	2.54542e-11
ENSG00000134759	ELP2	284.175	0.759688	0.108837	6.98004	2.95089e-12	2.58976e-11
ENSG00000175505	CLCF1	20.4025	2.73042	0.391217	6.97931	2.96639e-12	2.60159e-11
ENSG00000181789	COPG1	371.661	1.02396	0.146814	6.97449	3.06977e-12	2.68496e-11
ENSG00000180370	PAK2	873.692	0.868234	0.12454	6.97155	3.13466e-12	2.73615e-11
ENSG00000150753	CCT5	2010.36	0.514122	0.0737559	6.97059	3.15609e-12	2.75113e-11
ENSG00000175193	PARL	388.457	0.788632	0.113189	6.96737	3.22914e-12	2.81291e-11
ENSG00000136717	BIN1	13.3506	4.95149	0.710865	6.96545	3.27357e-12	2.84969e-11
ENSG00000101474	APMAP	1256.85	0.647276	0.0930998	6.95249	3.58884e-12	3.11362e-11
ENSG00000163608	C3orf17	173.475	0.959488	0.138113	6.94711	3.72834e-12	3.23248e-11
ENSG00000173113	TRMT112	2435.5	0.747749	0.107947	6.92701	4.29824e-12	3.71162e-11
ENSG00000079332	SAR1A	600.331	0.611126	0.0882644	6.92381	4.39644e-12	3.79388e-11
ENSG00000133703	KRAS	333.017	0.699689	0.101095	6.92113	4.48066e-12	3.86139e-11
ENSG00000156273	BACH1	99.1514	1.23959	0.179158	6.91895	4.55014e-12	3.91865e-11
ENSG00000148356	LRSAM1	89.3003	1.69308	0.244868	6.91427	4.70295e-12	4.04216e-11
ENSG00000188130	MAPK12	33.599	2.48163	0.360042	6.89259	5.47837e-12	4.69611e-11
ENSG00000160712	IL6R	347.327	0.904733	0.131358	6.88751	5.6776e-12	4.86043e-11
ENSG00000148426	PROSER2	143.083	1.16759	0.169556	6.88617	5.7314e-12	4.90324e-11
ENSG00000140367	UBE2Q2	178.233	0.90756	0.131978	6.87659	6.13025e-12	5.22712e-11
ENSG00000130811	EIF3G	620.727	0.74118	0.107818	6.87434	6.22785e-12	5.30334e-11
ENSG00000143751	SDE2	119.705	1.38413	0.201433	6.87143	6.35623e-12	5.3984e-11
ENSG00000076108	BAZ2A	529.296	0.643611	0.093714	6.86782	6.51905e-12	5.53305e-11
ENSG00000139641	ESYT1	430.526	0.718016	0.104737	6.85539	7.11171e-12	6.02418e-11
ENSG00000198900	TOP1	5571.85	0.660094	0.0962997	6.85458	7.15224e-12	6.05056e-11
ENSG00000151445	VIPAS39	84.2248	1.36243	0.198929	6.8488	7.44716e-12	6.2918e-11
ENSG00000108405	P2RX1	14.4574	7.74387	1.13086	6.84779	7.49989e-12	6.33221e-11
ENSG00000180773	SLC36A4	67.9416	1.23793	0.181159	6.83341	8.29173e-12	6.98704e-11
ENSG00000186141	POLR3C	68.2209	1.55341	0.227416	6.83072	8.44909e-12	7.11499e-11
ENSG00000115806	GORASP2	841.663	0.564223	0.0826492	6.82672	8.68778e-12	7.31122e-11
ENSG00000086758	HUWE1	521.485	0.943924	0.138322	6.82409	8.84853e-12	7.43472e-11
ENSG00000141556	TBCD	424.751	0.853404	0.125085	6.82259	8.94142e-12	7.50021e-11
ENSG00000116815	CD58	104.057	1.09667	0.160773	6.82125	9.02511e-12	7.5655e-11
ENSG00000197780	TAF13	263.945	1.21202	0.177693	6.82085	9.05036e-12	7.57681e-11
ENSG00000082996	RNF13	121.844	1.08529	0.159302	6.81281	9.57088e-12	8.00739e-11
ENSG00000177663	IL17RA	193.278	1.12242	0.16489	6.80709	9.95893e-12	8.32126e-11
ENSG00000139974	SLC38A6	164.443	0.980453	0.144075	6.80516	1.00936e-11	8.42834e-11
ENSG00000248323	LUCAT1	30.9045	4.13623	0.608082	6.8021	1.03102e-11	8.60358e-11
ENSG00000174227	PIGG	153.321	1.00026	0.147056	6.80187	1.0327e-11	8.61205e-11
ENSG00000182944	EWSR1	1045.04	0.757577	0.111454	6.79722	1.06657e-11	8.88656e-11
ENSG00000162601	MYSM1	131.85	1.20829	0.177802	6.79571	1.07778e-11	8.97058e-11
ENSG00000185236	RAB11B	423.189	1.00322	0.147858	6.78503	1.16066e-11	9.63556e-11
ENSG00000125912	NCLN	681.347	0.671259	0.0989757	6.78206	1.18477e-11	9.82312e-11
ENSG00000100804	PSMB5	1376.22	0.673612	0.0993691	6.77888	1.21109e-11	1.00349e-10
ENSG00000131508	UBE2D2	1086.91	0.582155	0.085882	6.77855	1.2139e-11	1.00453e-10
ENSG00000086062	B4GALT1	545.188	0.727808	0.107371	6.77844	1.21482e-11	1.00464e-10
ENSG00000087053	MTMR2	209.851	0.979211	0.144471	6.77789	1.21947e-11	1.00784e-10
ENSG00000136504	KAT7	265.846	0.915998	0.135159	6.77718	1.22543e-11	1.01212e-10
ENSG00000156983	BRPF1	145.768	0.919707	0.135746	6.7752	1.24233e-11	1.02542e-10
ENSG00000205339	IPO7	1476.15	0.674084	0.0995173	6.77353	1.25674e-11	1.03599e-10
ENSG00000129315	CCNT1	233.821	0.91248	0.134896	6.76431	1.33948e-11	1.10068e-10
ENSG00000144566	RAB5A	249.296	1.02949	0.15222	6.76318	1.34992e-11	1.10855e-10
ENSG00000097033	SH3GLB1	405.406	0.843732	0.124839	6.75857	1.39364e-11	1.14227e-10
ENSG00000114554	PLXNA1	252.077	0.974374	0.144205	6.75688	1.40996e-11	1.15418e-10
ENSG00000130734	ATG4D	82.0754	1.31953	0.195381	6.75364	1.44178e-11	1.17815e-10
ENSG00000106245	BUD31	413.808	0.667772	0.0988906	6.75263	1.45186e-11	1.18547e-10
ENSG00000138772	ANXA3	43.2193	1.93508	0.286621	6.75137	1.4646e-11	1.19511e-10
ENSG00000087266	SH3BP2	122.115	1.29981	0.192668	6.74635	1.51607e-11	1.23477e-10
ENSG00000164938	TP53INP1	115.275	1.2583	0.186555	6.74494	1.53088e-11	1.24605e-10
ENSG00000107742	SPOCK2	297.864	1.01875	0.151074	6.7434	1.54726e-11	1.25859e-10
ENSG00000076201	PTPN23	579.673	0.946188	0.140316	6.74329	1.54844e-11	1.25875e-10
ENSG00000090863	GLG1	802.41	0.795763	0.118143	6.73561	1.63241e-11	1.32617e-10
ENSG00000135446	CDK4	1672.05	1.09691	0.162937	6.73212	1.67206e-11	1.35753e-10
ENSG00000154174	TOMM70A	979.009	0.671903	0.0999006	6.72571	1.74736e-11	1.416e-10
ENSG00000160218	TRAPPC10	153.247	0.961743	0.143058	6.72274	1.78342e-11	1.44284e-10
ENSG00000125735	TNFSF14	132.271	1.49281	0.222147	6.71992	1.81819e-11	1.4697e-10
ENSG00000089234	BRAP	91.4202	1.10851	0.165081	6.71493	1.88152e-11	1.51899e-10
ENSG00000141076	CIRH1A	742.78	0.883563	0.131667	6.71061	1.93811e-11	1.56272e-10
ENSG00000182459	TEX19	14.6706	4.24089	0.632026	6.70999	1.94635e-11	1.56839e-10
ENSG00000132388	UBE2G1	299.017	0.97268	0.144971	6.70949	1.95308e-11	1.57185e-10
ENSG00000100241	SBF1	645.404	1.13198	0.168809	6.70568	2.00468e-11	1.61237e-10
ENSG00000101146	RAE1	868.919	0.693205	0.103391	6.70471	2.01811e-11	1.62216e-10
ENSG00000168005	C11orf84	162.174	1.26908	0.189536	6.69573	2.14593e-11	1.72062e-10
ENSG00000148358	GPR107	334.181	0.804479	0.120173	6.69436	2.16619e-11	1.7347e-10
ENSG00000062194	GPBP1	531.904	0.613866	0.0917549	6.69028	2.22749e-11	1.78268e-10
ENSG00000272669	RP3-508I15.21	33.8269	2.20555	0.329736	6.68886	2.24919e-11	1.79782e-10
ENSG00000165916	PSMC3	584.34	0.766855	0.114662	6.68799	2.2626e-11	1.80741e-10
ENSG00000181220	ZNF746	92.1672	1.39483	0.208656	6.68484	2.31172e-11	1.84551e-10
ENSG00000089022	MAPKAPK5	253.785	0.811205	0.121416	6.68119	2.37013e-11	1.89097e-10
ENSG00000257605	RP11-680A11.5	14.2031	3.52871	0.528593	6.67566	2.46116e-11	1.96117e-10
ENSG00000159720	ATP6V0D1	204.377	0.826922	0.123922	6.67294	2.50737e-11	1.9943e-10
ENSG00000101104	PABPC1L	343.767	1.6745	0.251045	6.67014	2.55567e-11	2.03146e-10
ENSG00000222041	LINC00152	361.604	1.02712	0.154059	6.66703	2.61029e-11	2.07233e-10
ENSG00000011275	RNF216	506.143	0.729481	0.109678	6.6511	2.90907e-11	2.30245e-10
ENSG00000077721	UBE2A	303.03	0.871933	0.131354	6.63805	3.17854e-11	2.50956e-10
ENSG00000129084	PSMA1	644.86	1.02082	0.153894	6.63324	3.28405e-11	2.59128e-10
ENSG00000110046	ATG2A	122.739	1.23208	0.185867	6.62883	3.3835e-11	2.66487e-10
ENSG00000137504	CREBZF	355.597	0.885314	0.133639	6.62466	3.48059e-11	2.73966e-10
ENSG00000111300	NAA25	245.673	0.93395	0.141056	6.62111	3.56503e-11	2.80442e-10
ENSG00000224470	ATXN1L	101.258	1.11244	0.168175	6.6148	3.72061e-11	2.92502e-10
ENSG00000161057	PSMC2	520.854	0.838704	0.126838	6.61239	3.78153e-11	2.96929e-10
ENSG00000185825	BCAP31	668.325	0.768164	0.116229	6.60905	3.86783e-11	3.03337e-10
ENSG00000175931	UBE2O	448.752	0.763621	0.115736	6.59796	4.16849e-11	3.25334e-10
ENSG00000151923	TIAL1	443.41	0.919451	0.139443	6.59375	4.28865e-11	3.3451e-10
ENSG00000182319	SGK223	217.969	1.28278	0.194607	6.59163	4.3501e-11	3.39098e-10
ENSG00000103194	USP10	445.37	0.714549	0.108429	6.59002	4.39771e-11	3.42395e-10
ENSG00000147421	HMBOX1	86.1589	1.37866	0.209666	6.57551	4.84863e-11	3.76821e-10
ENSG00000143748	NVL	128.809	1.01507	0.15463	6.56452	5.22002e-11	4.03738e-10
ENSG00000108010	GLRX3	381.541	0.826358	0.126021	6.55729	5.47951e-11	4.23301e-10
ENSG00000162923	WDR26	215.75	1.2236	0.186826	6.54942	5.77615e-11	4.45034e-10
ENSG00000141644	MBD1	163.183	0.988418	0.151053	6.54353	6.00843e-11	4.62472e-10
ENSG00000099968	BCL2L13	144.117	1.22618	0.187408	6.54287	6.03488e-11	4.63981e-10
ENSG00000256060	TRAPPC2P1	33.0138	1.98793	0.3041	6.53709	6.27279e-11	4.81698e-10
ENSG00000157800	SLC37A3	220.719	1.12061	0.171644	6.52868	6.635e-11	5.08001e-10
ENSG00000106615	RHEB	143.574	0.97449	0.149377	6.52368	6.86049e-11	5.24953e-10
ENSG00000047644	WWC3	84.9383	1.20426	0.184876	6.51388	7.32352e-11	5.59389e-10
ENSG00000006704	GTF2IRD1	238.765	0.82899	0.127324	6.51087	7.47186e-11	5.70381e-10
ENSG00000109920	FNBP4	862.804	0.75677	0.116255	6.50958	7.53614e-11	5.74948e-10
ENSG00000087206	UIMC1	184.443	0.87025	0.133743	6.50687	7.67329e-11	5.85066e-10
ENSG00000130826	DKC1	1449	0.449723	0.0691263	6.50583	7.72681e-11	5.88451e-10
ENSG00000148331	ASB6	51.2618	1.7883	0.274895	6.50542	7.74777e-11	5.89699e-10
ENSG00000146592	CREB5	20.2365	2.90484	0.446869	6.50044	8.00853e-11	6.08469e-10
ENSG00000131389	SLC6A6	129.544	1.22157	0.187935	6.49997	8.03365e-11	6.10019e-10
ENSG00000085721	RRN3	372.205	0.894491	0.137619	6.49978	8.04379e-11	6.10429e-10
ENSG00000076685	NT5C2	219.707	0.821534	0.12655	6.4918	8.48178e-11	6.42911e-10
ENSG00000135870	RC3H1	239.961	0.830147	0.12792	6.48959	8.60705e-11	6.51641e-10
ENSG00000110925	CSRNP2	42.8578	1.7305	0.266664	6.48944	8.61585e-11	6.51924e-10
ENSG00000100918	REC8	35.9507	2.08252	0.321066	6.48628	8.79804e-11	6.6493e-10
ENSG00000105393	BABAM1	249.201	0.750001	0.115661	6.48446	8.90503e-11	6.72622e-10
ENSG00000103326	CAPN15	436.254	0.916972	0.141422	6.48395	8.93519e-11	6.74505e-10
ENSG00000113282	CLINT1	497.357	0.658881	0.101619	6.48385	8.94097e-11	6.74547e-10
ENSG00000119912	IDE	184.129	0.881819	0.13608	6.48016	9.16251e-11	6.9005e-10
ENSG00000075407	ZNF37A	333.037	0.960335	0.148255	6.4776	9.31935e-11	7.01043e-10
ENSG00000138095	LRPPRC	1220.72	0.651387	0.100634	6.47282	9.61932e-11	7.23187e-10
ENSG00000158669	AGPAT6	474.403	0.766365	0.118408	6.47223	9.65689e-11	7.25166e-10
ENSG00000062650	WAPAL	435.735	0.655024	0.101214	6.47167	9.69244e-11	7.27412e-10
ENSG00000109332	UBE2D3	1745.34	0.498833	0.0771733	6.4638	1.02108e-10	7.64535e-10
ENSG00000088356	PDRG1	359.19	0.887732	0.137341	6.46371	1.02168e-10	7.64544e-10
ENSG00000102225	CDK16	346.561	0.839404	0.129897	6.46209	1.03265e-10	7.72301e-10
ENSG00000100220	RTCB	404.222	0.644184	0.0997002	6.46121	1.03869e-10	7.76371e-10
ENSG00000108953	YWHAE	3234.47	0.667874	0.103503	6.45268	1.09888e-10	8.19937e-10
ENSG00000083896	YTHDC1	614.08	0.668142	0.103635	6.44707	1.14032e-10	8.49379e-10
ENSG00000146112	PPP1R18	73.0791	1.3813	0.214281	6.44622	1.14672e-10	8.53654e-10
ENSG00000146872	TLK2	335.564	0.685192	0.106316	6.44487	1.15699e-10	8.60805e-10
ENSG00000067182	TNFRSF1A	335.204	0.603853	0.0937171	6.44336	1.16858e-10	8.68425e-10
ENSG00000008300	CELSR3	52.1926	1.52764	0.237202	6.44025	1.19279e-10	8.85904e-10
ENSG00000148660	CAMK2G	89.0282	1.15263	0.178986	6.43975	1.19667e-10	8.88276e-10
ENSG00000197343	ZNF655	180.431	0.77689	0.120735	6.43465	1.23757e-10	9.17579e-10
ENSG00000170876	TMEM43	375.964	0.762158	0.118501	6.43163	1.26239e-10	9.3491e-10
ENSG00000070404	FSTL3	352.609	0.793807	0.123609	6.4219	1.34582e-10	9.9555e-10
ENSG00000149428	HYOU1	2054.94	0.750321	0.11689	6.41902	1.37152e-10	1.0134e-09
ENSG00000108179	PPIF	1037.01	0.529063	0.0824439	6.41725	1.38762e-10	1.02471e-09
ENSG00000148516	ZEB1	174.422	0.931504	0.145185	6.41597	1.39932e-10	1.03276e-09
ENSG00000162735	PEX19	164.585	0.87367	0.136187	6.41521	1.40627e-10	1.0367e-09
ENSG00000097007	ABL1	238.327	0.964411	0.150566	6.40525	1.50125e-10	1.10482e-09
ENSG00000006327	TNFRSF12A	257.248	1.13762	0.177667	6.4031	1.52256e-10	1.11923e-09
ENSG00000111252	SH2B3	74.3978	1.62454	0.253901	6.39833	1.57087e-10	1.15343e-09
ENSG00000131351	HAUS8	119.646	1.03826	0.162364	6.39461	1.60958e-10	1.17894e-09
ENSG00000104312	RIPK2	123.382	1.0787	0.16869	6.39456	1.61005e-10	1.17894e-09
ENSG00000135686	KLHL36	185.878	0.839022	0.131211	6.39447	1.61109e-10	1.17894e-09
ENSG00000169398	PTK2	178.146	0.811761	0.127014	6.39111	1.64687e-10	1.20307e-09
ENSG00000105499	PLA2G4C	18.3137	3.38923	0.530336	6.39073	1.65094e-10	1.20536e-09
ENSG00000110344	UBE4A	477.924	0.688371	0.107738	6.38931	1.66641e-10	1.21597e-09
ENSG00000147852	VLDLR	22.6577	4.3431	0.679902	6.38783	1.68256e-10	1.22706e-09
ENSG00000065809	FAM107B	613.822	0.591387	0.0927086	6.37899	1.78257e-10	1.29633e-09
ENSG00000244754	N4BP2L2	499.244	0.706757	0.11083	6.37693	1.80677e-10	1.31319e-09
ENSG00000119041	GTF3C3	279.721	0.762792	0.119644	6.37553	1.82329e-10	1.32445e-09
ENSG00000122643	NT5C3A	334.159	0.692499	0.108644	6.37403	1.84128e-10	1.33602e-09
ENSG00000162604	TM2D1	281.613	0.881784	0.138416	6.37056	1.88339e-10	1.36427e-09
ENSG00000075426	FOSL2	94.7239	1.23678	0.19415	6.37022	1.88761e-10	1.36656e-09
ENSG00000108587	GOSR1	431.581	0.53854	0.0845517	6.36936	1.89824e-10	1.37349e-09
ENSG00000159885	ZNF222	18.7351	2.66151	0.418114	6.36551	1.94647e-10	1.4068e-09
ENSG00000141084	RANBP10	102.291	1.02421	0.160925	6.36452	1.95899e-10	1.41505e-09
ENSG00000174238	PITPNA	340.232	0.708295	0.111297	6.36399	1.96576e-10	1.41915e-09
ENSG00000184557	SOCS3	39.3571	2.11717	0.332788	6.36192	1.99253e-10	1.43768e-09
ENSG00000222009	BTBD19	59.5561	1.79866	0.282804	6.36008	2.01651e-10	1.45335e-09
ENSG00000132664	POLR3F	102.032	1.07195	0.168641	6.35643	2.06493e-10	1.48659e-09
ENSG00000103275	UBE2I	890.615	0.559715	0.0881078	6.35261	2.11693e-10	1.52317e-09
ENSG00000156261	CCT8	1461.53	0.502183	0.0790606	6.35187	2.12715e-10	1.52967e-09
ENSG00000141198	TOM1L1	129.486	1.10418	0.173876	6.35039	2.1477e-10	1.54359e-09
ENSG00000168894	RNF181	686.896	0.735686	0.115854	6.35012	2.15151e-10	1.54547e-09
ENSG00000205323	SARNP	58.0777	1.49828	0.236082	6.34643	2.20362e-10	1.58114e-09
ENSG00000082641	NFE2L1	369.141	0.67317	0.106233	6.33673	2.34695e-10	1.68024e-09
ENSG00000136856	SLC2A8	2571.26	0.892614	0.140893	6.3354	2.3672e-10	1.69286e-09
ENSG00000083845	RPS5	5042.25	0.765026	0.120763	6.33491	2.37477e-10	1.69734e-09
ENSG00000078140	UBE2K	839.156	0.56794	0.0897886	6.3253	2.52744e-10	1.80246e-09
ENSG00000223482	NUTM2A-AS1	54.5362	1.64522	0.260116	6.32494	2.53334e-10	1.80567e-09
ENSG00000101752	MIB1	302.561	0.677531	0.107148	6.32332	2.56005e-10	1.8237e-09
ENSG00000006125	AP2B1	2039.75	0.771535	0.122088	6.31948	2.62443e-10	1.86647e-09
ENSG00000174738	NR1D2	96.6351	1.12239	0.177701	6.31616	2.68138e-10	1.90487e-09
ENSG00000086232	EIF2AK1	2134.51	0.651015	0.103109	6.31384	2.72197e-10	1.93265e-09
ENSG00000186866	POFUT2	111.919	1.18455	0.187667	6.31199	2.75463e-10	1.95368e-09
ENSG00000160201	U2AF1	2869.58	0.488864	0.0774671	6.3106	2.77957e-10	1.9692e-09
ENSG00000104388	RAB2A	944.336	0.592359	0.0938699	6.31043	2.78269e-10	1.97033e-09
ENSG00000180921	FAM83H	318.387	0.734424	0.116394	6.30982	2.79354e-10	1.97693e-09
ENSG00000165233	C9orf89	95.8321	1.37148	0.217511	6.30534	2.87566e-10	2.03282e-09
ENSG00000119689	DLST	193.72	1.10329	0.174991	6.3048	2.88558e-10	2.03782e-09
ENSG00000067606	PRKCZ	326.961	0.9034	0.143299	6.3043	2.89504e-10	2.04315e-09
ENSG00000181097	RP11-429J17.2	120.889	1.12452	0.178395	6.30357	2.90861e-10	2.05049e-09
ENSG00000109971	HSPA8	3006.86	1.28929	0.204553	6.30298	2.91976e-10	2.05723e-09
ENSG00000198522	GPN1	342.357	0.781395	0.124007	6.3012	2.95344e-10	2.07982e-09
ENSG00000143621	ILF2	905.243	0.927008	0.147265	6.29483	3.07732e-10	2.1647e-09
ENSG00000013375	PGM3	327.16	0.667694	0.106276	6.28265	3.32857e-10	2.33253e-09
ENSG00000124831	LRRFIP1	2194	0.635888	0.101274	6.27887	3.41051e-10	2.38817e-09
ENSG00000088930	XRN2	2116.8	0.493266	0.0785614	6.27873	3.41353e-10	2.38817e-09
ENSG00000175470	PPP2R2D	255.36	0.829223	0.13236	6.26491	3.73045e-10	2.59862e-09
ENSG00000162734	PEA15	275.237	0.949318	0.151644	6.26018	3.8454e-10	2.67581e-09
ENSG00000080822	CLDND1	122.1	1.57018	0.250956	6.25681	3.9294e-10	2.73131e-09
ENSG00000015475	BID	273.502	0.702612	0.112384	6.25189	4.05523e-10	2.81574e-09
ENSG00000146833	TRIM4	283.284	0.95831	0.153363	6.24866	4.13992e-10	2.87146e-09
ENSG00000124224	PPP4R1L	18.9955	3.20693	0.513235	6.24845	4.14541e-10	2.87372e-09
ENSG00000146426	TIAM2	60.4499	1.27844	0.204632	6.2475	4.17077e-10	2.88664e-09
ENSG00000204843	DCTN1	478.229	0.787164	0.125999	6.24736	4.17446e-10	2.88765e-09
ENSG00000123353	ORMDL2	181.289	0.732761	0.117312	6.24629	4.20327e-10	2.90602e-09
ENSG00000146083	RNF44	267.699	0.833836	0.133524	6.24485	4.24197e-10	2.92682e-09
ENSG00000149716	ORAOV1	137.149	1.07006	0.17135	6.24484	4.24243e-10	2.92682e-09
ENSG00000156502	SUPV3L1	140.128	1.00699	0.161367	6.24038	4.36521e-10	3.00992e-09
ENSG00000185033	SEMA4B	62.8562	1.42366	0.228314	6.23556	4.50178e-10	3.10077e-09
ENSG00000137207	YIPF3	265.16	0.936149	0.15015	6.23475	4.52512e-10	3.11518e-09
ENSG00000149658	YTHDF1	793.138	0.595136	0.0955814	6.22649	4.77013e-10	3.26989e-09
ENSG00000135924	DNAJB2	142.9	1.04632	0.168451	6.21142	5.25081e-10	3.59367e-09
ENSG00000185467	KPNA7	29.0989	2.93076	0.472633	6.20093	5.61314e-10	3.83352e-09
ENSG00000144130	NT5DC4	30.1016	1.90879	0.307997	6.19744	5.73888e-10	3.91732e-09
ENSG00000155256	ZFYVE27	117.081	1.01707	0.164116	6.19727	5.7451e-10	3.91949e-09
ENSG00000108578	BLMH	781.747	0.685646	0.110675	6.19514	5.82323e-10	3.97069e-09
ENSG00000157514	TSC22D3	33.3601	5.45641	0.880908	6.19407	5.86285e-10	3.9956e-09
ENSG00000103365	GGA2	249.955	0.686245	0.110819	6.19247	5.92285e-10	4.03436e-09
ENSG00000104714	ERICH1	251.158	0.819845	0.132406	6.19189	5.94465e-10	4.04707e-09
ENSG00000255529	POLR2M	170.306	0.816414	0.132008	6.1846	6.22603e-10	4.23416e-09
ENSG00000160551	TAOK1	1113	0.61685	0.0998657	6.17679	6.54185e-10	4.44243e-09
ENSG00000110696	C11orf58	735.912	0.603817	0.0977562	6.17677	6.54261e-10	4.44243e-09
ENSG00000073150	PANX2	35.1883	1.64672	0.266613	6.17642	6.55715e-10	4.44996e-09
ENSG00000149527	PLCH2	31.7498	2.61634	0.423747	6.1743	6.64575e-10	4.50535e-09
ENSG00000134283	PPHLN1	510.937	0.743117	0.12037	6.17362	6.67432e-10	4.52234e-09
ENSG00000197694	SPTAN1	230.808	0.982462	0.159346	6.1656	7.0217e-10	4.75024e-09
ENSG00000172037	LAMB2	219.54	0.750371	0.121725	6.16448	7.07145e-10	4.78138e-09
ENSG00000080845	DLGAP4	342.019	0.806559	0.130902	6.16154	7.20414e-10	4.86346e-09
ENSG00000183520	UTP11L	321.14	0.621997	0.101018	6.15726	7.4012e-10	4.99227e-09
ENSG00000086619	ERO1LB	71.6753	1.76168	0.286158	6.15632	7.44533e-10	5.01454e-09
ENSG00000003249	DBNDD1	125.155	1.00081	0.162568	6.15628	7.44738e-10	5.01454e-09
ENSG00000134780	DAGLA	129.939	1.36417	0.221614	6.15563	7.47809e-10	5.03043e-09
ENSG00000105497	ZNF175	31.2697	2.01269	0.326969	6.15561	7.47877e-10	5.03043e-09
ENSG00000105755	ETHE1	280.301	0.928848	0.150903	6.15525	7.49598e-10	5.03938e-09
ENSG00000103429	BFAR	366.793	0.594109	0.0965654	6.1524	7.63214e-10	5.1229e-09
ENSG00000119729	RHOQ	302.128	0.862098	0.140237	6.14742	7.87542e-10	5.28071e-09
ENSG00000125875	TBC1D20	573.171	0.605879	0.0985991	6.14487	8.0028e-10	5.36333e-09
ENSG00000155287	SLC25A28	96.2708	1.00154	0.163139	6.1392	8.29379e-10	5.54682e-09
ENSG00000161904	LEMD2	194.121	0.838372	0.136701	6.13288	8.63003e-10	5.7687e-09
ENSG00000136891	TEX10	171.066	1.04041	0.169693	6.13111	8.72683e-10	5.82135e-09
ENSG00000047849	MAP4	806.488	0.544868	0.088897	6.1292	8.832e-10	5.88845e-09
ENSG00000106701	FSD1L	44.7358	1.65013	0.269345	6.12645	8.98609e-10	5.98501e-09
ENSG00000130684	ZNF337	165.013	1.05579	0.172354	6.12569	9.02891e-10	6.01042e-09
ENSG00000101290	CDS2	459.299	0.64178	0.10477	6.12558	9.03513e-10	6.01146e-09
ENSG00000256618	MTRNR2L1	1457.73	1.33428	0.21783	6.12532	9.0501e-10	6.01832e-09
ENSG00000176783	RUFY1	259.389	0.764206	0.124867	6.12015	9.3489e-10	6.21382e-09
ENSG00000240230	COX19	464.131	0.88837	0.145208	6.11792	9.48057e-10	6.28514e-09
ENSG00000197818	SLC9A8	85.0409	1.12699	0.184221	6.11763	9.4979e-10	6.2934e-09
ENSG00000173559	NABP1	108.191	1.00406	0.164303	6.11105	9.89774e-10	6.54153e-09
ENSG00000198755	RPL10A	5961.69	0.509998	0.0834679	6.1101	9.95669e-10	6.57376e-09
ENSG00000162236	STX5	96.3492	1.03707	0.169914	6.10353	1.03752e-09	6.83954e-09
ENSG00000107643	MAPK8	101.14	1.10109	0.180464	6.10147	1.05097e-09	6.92472e-09
ENSG00000166747	AP1G1	323.027	0.782839	0.128428	6.09556	1.09053e-09	7.17434e-09
ENSG00000116977	LGALS8	337.67	0.704671	0.115612	6.09516	1.0933e-09	7.18894e-09
ENSG00000007372	PAX6	179.935	0.893217	0.146624	6.0919	1.11582e-09	7.32579e-09
ENSG00000075643	MOCOS	359.823	0.868636	0.14262	6.09057	1.12508e-09	7.38285e-09
ENSG00000100813	ACIN1	559.719	0.722229	0.118638	6.08766	1.1457e-09	7.51431e-09
ENSG00000165416	SUGT1	848.868	0.538874	0.088546	6.08581	1.15905e-09	7.59801e-09
ENSG00000169100	SLC25A6	2620.73	0.605872	0.0995566	6.08571	1.15977e-09	7.59888e-09
ENSG00000144659	SLC25A38	199.955	0.847077	0.139246	6.08334	1.17708e-09	7.70836e-09
ENSG00000170293	CMTM8	301.452	0.728408	0.119765	6.08198	1.18709e-09	7.76605e-09
ENSG00000187555	USP7	1162.9	0.464988	0.0765726	6.07252	1.25922e-09	8.21709e-09
ENSG00000101236	RNF24	128.892	1.1138	0.183554	6.06795	1.29553e-09	8.4455e-09
ENSG00000116741	RGS2	59.499	1.58321	0.261106	6.06348	1.33208e-09	8.6794e-09
ENSG00000166012	TAF1D	1443.78	0.643918	0.106249	6.06046	1.35732e-09	8.83492e-09
ENSG00000171017	LRRC8E	166.439	1.03183	0.170275	6.05979	1.36297e-09	8.8672e-09
ENSG00000129197	RPAIN	338.264	0.864635	0.142694	6.05938	1.36648e-09	8.88556e-09
ENSG00000113658	SMAD5	481.496	0.712395	0.117667	6.05435	1.40986e-09	9.15843e-09
ENSG00000165637	VDAC2	501.15	0.579344	0.0957186	6.05258	1.42542e-09	9.25014e-09
ENSG00000159256	MORC3	124.74	1.03729	0.17154	6.04691	1.47652e-09	9.57213e-09
ENSG00000198746	GPATCH3	124.781	1.14011	0.188642	6.04378	1.50543e-09	9.75128e-09
ENSG00000138834	MAPK8IP3	72.2064	1.52185	0.251858	6.04251	1.51735e-09	9.82202e-09
ENSG00000168701	TMEM208	316.994	0.74077	0.122653	6.03954	1.54554e-09	9.9995e-09
ENSG00000006607	FARP2	164.568	0.733419	0.121515	6.03561	1.58362e-09	1.02305e-08
ENSG00000203879	GDI1	100.092	1.15201	0.191032	6.03042	1.63532e-09	1.05539e-08
ENSG00000154832	CXXC1	311.695	0.81243	0.134797	6.02706	1.66967e-09	1.07541e-08
ENSG00000125386	FAM193A	330.575	0.871805	0.14477	6.02199	1.72282e-09	1.10853e-08
ENSG00000171121	KCNMB3	149.915	1.15606	0.191977	6.02188	1.72406e-09	1.10878e-08
ENSG00000101084	C20orf24	641.632	0.690642	0.114804	6.01585	1.78948e-09	1.14913e-08
ENSG00000145916	RMND5B	140.76	1.06706	0.177496	6.01174	1.83537e-09	1.17743e-08
ENSG00000133639	BTG1	223.971	1.13574	0.189021	6.00852	1.87219e-09	1.19926e-08
ENSG00000172071	EIF2AK3	211.52	1.03094	0.171606	6.00758	1.88317e-09	1.2057e-08
ENSG00000168621	GDNF	175.836	0.760526	0.126603	6.00717	1.88784e-09	1.20749e-08
ENSG00000125482	TTF1	333.882	0.589295	0.0981358	6.00489	1.91459e-09	1.22339e-08
ENSG00000272968	RBAK-RBAKDN	179.764	1.23358	0.205442	6.00452	1.91894e-09	1.22556e-08
ENSG00000204149	AGAP6	50.6133	1.74117	0.289982	6.00442	1.92021e-09	1.22576e-08
ENSG00000117410	ATP6V0B	882.979	0.608953	0.101448	6.00262	1.94155e-09	1.23877e-08
ENSG00000125870	SNRPB2	2676.14	0.472426	0.0787145	6.00176	1.95187e-09	1.24474e-08
ENSG00000161526	SAP30BP	362.573	0.840429	0.140216	5.9938	2.04994e-09	1.30599e-08
ENSG00000147687	TATDN1	119.493	0.818854	0.136662	5.9918	2.07533e-09	1.32151e-08
ENSG00000007392	LUC7L	328.491	0.707933	0.118366	5.9809	2.2191e-09	1.41097e-08
ENSG00000214517	PPME1	295.956	0.685945	0.114745	5.97799	2.25903e-09	1.43494e-08
ENSG00000127804	METTL16	206.562	0.67782	0.113398	5.97737	2.26774e-09	1.43977e-08
ENSG00000179361	ARID3B	119.197	1.14002	0.190736	5.97693	2.27384e-09	1.44293e-08
ENSG00000136925	TSTD2	114.068	0.896117	0.149943	5.9764	2.28121e-09	1.44548e-08
ENSG00000254986	DPP3	231.863	0.630502	0.105559	5.97297	2.32969e-09	1.47547e-08
ENSG00000107929	LARP4B	296.807	0.836341	0.140175	5.9664	2.42544e-09	1.53461e-08
ENSG00000078142	PIK3C3	161.836	0.921553	0.154474	5.96576	2.43494e-09	1.53986e-08
ENSG00000125686	MED1	1124.93	0.403661	0.0677785	5.95559	2.59141e-09	1.63401e-08
ENSG00000133316	WDR74	186.316	0.78578	0.132027	5.95168	2.6541e-09	1.67109e-08
ENSG00000108509	CAMTA2	101.525	0.986641	0.165783	5.9514	2.65855e-09	1.67307e-08
ENSG00000145782	ATG12	260.597	0.679768	0.114248	5.94992	2.68276e-09	1.68748e-08
ENSG00000181523	SGSH	301.274	0.726459	0.122355	5.93732	2.89724e-09	1.81885e-08
ENSG00000147548	WHSC1L1	491.822	0.604489	0.101828	5.93636	2.91414e-09	1.82767e-08
ENSG00000148396	SEC16A	377.155	0.864121	0.145627	5.9338	2.96007e-09	1.85437e-08
ENSG00000152292	SH2D6	13.465	3.55364	0.599559	5.92709	3.08354e-09	1.92736e-08
ENSG00000114739	ACVR2B	120.969	0.933945	0.157696	5.92244	3.17205e-09	1.97981e-08
ENSG00000051108	HERPUD1	790.152	1.33505	0.225549	5.91911	3.23686e-09	2.01635e-08
ENSG00000071462	WBSCR22	333.858	0.57179	0.0966491	5.91615	3.2957e-09	2.05202e-08
ENSG00000170471	RALGAPB	238.388	0.731692	0.123799	5.91034	3.41403e-09	2.12467e-08
ENSG00000254911	SCARNA9	191.964	1.19764	0.202835	5.90449	3.53747e-09	2.19937e-08
ENSG00000178950	GAK	323.299	0.88524	0.149942	5.90386	3.55092e-09	2.2056e-08
ENSG00000114062	UBE3A	861.367	0.467046	0.0792569	5.89281	3.79681e-09	2.3538e-08
ENSG00000065060	UHRF1BP1	122.473	1.03476	0.175691	5.88966	3.86988e-09	2.39565e-08
ENSG00000113272	THG1L	156.936	1.05456	0.179132	5.88707	3.93108e-09	2.43237e-08
ENSG00000158201	ABHD3	116.082	1.38568	0.235588	5.88178	4.05888e-09	2.50783e-08
ENSG00000109572	CLCN3	272.522	0.766778	0.130373	5.88142	4.06772e-09	2.51209e-08
ENSG00000107341	UBE2R2	1139.19	0.436563	0.0742377	5.88061	4.08767e-09	2.52321e-08
ENSG00000180008	SOCS4	85.3937	1.06579	0.181369	5.87636	4.19393e-09	2.58633e-08
ENSG00000075292	ZNF638	525.247	0.77053	0.131171	5.87425	4.24763e-09	2.61694e-08
ENSG00000167548	KMT2D	68.5768	1.3701	0.233256	5.87379	4.25934e-09	2.6229e-08
ENSG00000183856	IQGAP3	125.754	0.934947	0.159359	5.86694	4.43913e-09	2.7284e-08
ENSG00000125484	GTF3C4	243.566	0.695406	0.118557	5.86556	4.47607e-09	2.7498e-08
ENSG00000136238	RAC1	2062.32	0.496207	0.0845986	5.86543	4.47983e-09	2.7508e-08
ENSG00000012983	MAP4K5	562.861	0.978826	0.166898	5.86483	4.496e-09	2.75942e-08
ENSG00000136527	TRA2B	1175.99	0.593135	0.101159	5.86342	4.53439e-09	2.78033e-08
ENSG00000213337	ANKRD39	277.41	0.777341	0.132601	5.86226	4.56604e-09	2.79841e-08
ENSG00000196505	GDAP2	106.848	1.12449	0.192208	5.85041	4.90359e-09	3.00101e-08
ENSG00000139718	SETD1B	141.812	1.07518	0.183844	5.8483	4.96631e-09	3.03795e-08
ENSG00000088854	C20orf194	159.704	0.918992	0.157191	5.84635	5.02477e-09	3.07225e-08
ENSG00000196652	ZKSCAN5	133.198	0.861254	0.147384	5.8436	5.10859e-09	3.12054e-08
ENSG00000171456	ASXL1	671.802	0.500973	0.0857701	5.84088	5.19253e-09	3.17032e-08
ENSG00000120063	GNA13	170.731	0.896801	0.153634	5.83726	5.30651e-09	3.23684e-08
ENSG00000106089	STX1A	28.2348	2.27826	0.391105	5.8252	5.70458e-09	3.47309e-08
ENSG00000206573	SETD5-AS1	186.438	0.869466	0.149469	5.81702	5.99049e-09	3.63857e-08
ENSG00000163159	VPS72	245.187	1.02112	0.17595	5.80344	6.4967e-09	3.94233e-08
ENSG00000144635	DYNC1LI1	264.169	0.610869	0.105363	5.79777	6.72041e-09	4.06851e-08
ENSG00000147649	MTDH	8657.98	0.554039	0.0955621	5.79769	6.72363e-09	4.06855e-08
ENSG00000225190	PLEKHM1	45.0818	1.50629	0.26009	5.79144	6.97847e-09	4.21485e-08
ENSG00000134440	NARS	1108.26	0.556827	0.0962175	5.78717	7.15832e-09	4.31741e-08
ENSG00000171497	PPID	535.472	0.596608	0.103125	5.78529	7.23883e-09	4.36393e-08
ENSG00000132963	POMP	1579.55	0.496222	0.085799	5.78354	7.3145e-09	4.40543e-08
ENSG00000142507	PSMB6	1104.59	0.635246	0.109854	5.78267	7.35248e-09	4.42418e-08
ENSG00000263002	ZNF234	111.555	1.15689	0.200065	5.78258	7.35618e-09	4.42434e-08
ENSG00000183426	NPIPA1	75.0335	2.77649	0.480659	5.77643	7.63018e-09	4.57846e-08
ENSG00000185404	SP140L	242.073	0.797324	0.138068	5.77485	7.70195e-09	4.61723e-08
ENSG00000143761	ARF1	1630.01	0.409522	0.0709229	5.77419	7.73239e-09	4.63333e-08
ENSG00000063244	U2AF2	865.493	0.76877	0.133167	5.77299	7.78791e-09	4.66443e-08
ENSG00000173276	ZBTB21	53.8344	1.58112	0.274159	5.76714	8.06279e-09	4.82458e-08
ENSG00000124571	XPO5	333.281	0.604221	0.104787	5.76617	8.10929e-09	4.85016e-08
ENSG00000239382	ALKBH6	54.8912	1.3021	0.225865	5.76493	8.16904e-09	4.88363e-08
ENSG00000127914	AKAP9	1725.02	0.817467	0.141879	5.76172	8.32617e-09	4.97296e-08
ENSG00000141252	VPS53	195.062	0.738385	0.128362	5.75235	8.80134e-09	5.2422e-08
ENSG00000175727	MLXIP	273.098	0.719821	0.125159	5.75127	8.8576e-09	5.27328e-08
ENSG00000133858	ZFC3H1	549.022	0.619771	0.107801	5.74919	8.96725e-09	5.33363e-08
ENSG00000111275	ALDH2	701.619	0.593898	0.103319	5.74822	9.01879e-09	5.36025e-08
ENSG00000133818	RRAS2	174.138	0.90599	0.157613	5.74819	9.02032e-09	5.36025e-08
ENSG00000130559	CAMSAP1	140.258	0.852999	0.148517	5.74345	9.27671e-09	5.50247e-08
ENSG00000149798	CDC42EP2	41.0461	1.47732	0.257238	5.74301	9.30075e-09	5.5142e-08
ENSG00000168495	POLR3D	249.286	0.852294	0.148492	5.73964	9.48771e-09	5.62246e-08
ENSG00000154640	BTG3	158.702	0.907767	0.158253	5.73617	9.684e-09	5.73352e-08
ENSG00000197081	IGF2R	1181.68	1.23503	0.215688	5.726	1.02828e-08	6.06302e-08
ENSG00000157557	ETS2	471.742	0.61956	0.108383	5.7164	1.08807e-08	6.40674e-08
ENSG00000102901	CENPT	73.82	1.38821	0.242917	5.71472	1.09883e-08	6.466e-08
ENSG00000170464	DNAJC18	38.8055	1.671	0.292699	5.70894	1.13683e-08	6.67863e-08
ENSG00000143776	CDC42BPA	319.842	0.679306	0.119001	5.7084	1.14042e-08	6.69667e-08
ENSG00000091527	CDV3	1704.65	0.578203	0.101329	5.70621	1.15521e-08	6.7804e-08
ENSG00000136271	DDX56	435.989	0.584375	0.102459	5.7035	1.17375e-08	6.88296e-08
ENSG00000172059	KLF11	51.1487	1.39165	0.244035	5.70266	1.17952e-08	6.91366e-08
ENSG00000147677	EIF3H	953.525	0.880611	0.15451	5.69937	1.20254e-08	7.04069e-08
ENSG00000145632	PLK2	35.1958	1.55444	0.272926	5.69547	1.2303e-08	7.19497e-08
ENSG00000116954	RRAGC	450.249	0.588859	0.103399	5.69505	1.23338e-08	7.20647e-08
ENSG00000214078	CPNE1	1583.31	0.613768	0.107895	5.68855	1.28125e-08	7.47936e-08
ENSG00000143067	ZNF697	83.6242	1.06673	0.187571	5.68706	1.29242e-08	7.53773e-08
ENSG00000189410	SH2D5	18.5937	2.30835	0.405947	5.68633	1.29797e-08	7.56667e-08
ENSG00000159479	MED8	280.623	0.617257	0.108573	5.6852	1.30662e-08	7.61367e-08
ENSG00000113615	SEC24A	168.501	0.969684	0.170649	5.68233	1.32871e-08	7.73543e-08
ENSG00000137842	TMEM62	88.3206	1.36906	0.240947	5.68198	1.33144e-08	7.74784e-08
ENSG00000147650	LRP12	54.8592	1.31264	0.231099	5.67998	1.34709e-08	7.83535e-08
ENSG00000114126	TFDP2	381.83	0.714276	0.125763	5.67954	1.35056e-08	7.85201e-08
ENSG00000104131	EIF3J	1731.12	0.535337	0.0943248	5.67547	1.38312e-08	8.03041e-08
ENSG00000106404	CLDN15	90.6007	1.40148	0.246954	5.67509	1.38618e-08	8.0446e-08
ENSG00000182504	CEP97	58.2235	1.35674	0.239359	5.66822	1.44284e-08	8.35464e-08
ENSG00000167658	EEF2	10919.7	0.522834	0.0923259	5.66292	1.4882e-08	8.60463e-08
ENSG00000166123	GPT2	910.343	0.725498	0.128114	5.6629	1.48832e-08	8.60463e-08
ENSG00000181666	HKR1	55.3099	1.50806	0.266341	5.66213	1.4951e-08	8.63782e-08
ENSG00000148690	FRA10AC1	475.653	0.553024	0.0976779	5.66171	1.49868e-08	8.65465e-08
ENSG00000005486	RHBDD2	193.506	0.830907	0.146866	5.65759	1.53515e-08	8.84544e-08
ENSG00000125633	CCDC93	539.34	0.669487	0.118339	5.65738	1.53705e-08	8.85245e-08
ENSG00000242349	NPPA-AS1	26.766	2.07921	0.368004	5.64997	1.60479e-08	9.22614e-08
ENSG00000144895	EIF2A	433.313	0.807227	0.142972	5.64604	1.64188e-08	9.41839e-08
ENSG00000253352	TUG1	435.596	0.615174	0.109099	5.63871	1.71333e-08	9.80639e-08
ENSG00000123130	ACOT9	167.981	0.969808	0.172074	5.636	1.74048e-08	9.95309e-08
ENSG00000116604	MEF2D	59.3774	1.58809	0.28181	5.63533	1.74723e-08	9.98717e-08
ENSG00000147614	ATP6V0D2	9.36289	6.37564	1.13165	5.63394	1.76135e-08	1.00589e-07
ENSG00000262001	DLGAP1-AS2	15.2794	2.7665	0.491535	5.62828	1.82016e-08	1.03673e-07
ENSG00000119048	UBE2B	724.732	0.717715	0.127602	5.62463	1.8591e-08	1.05844e-07
ENSG00000165861	ZFYVE1	98.6976	1.1404	0.202861	5.62161	1.8919e-08	1.07664e-07
ENSG00000113742	CPEB4	142.33	0.999191	0.177889	5.61695	1.94361e-08	1.10461e-07
ENSG00000185619	PCGF3	277.155	0.851026	0.15172	5.60919	2.03278e-08	1.15426e-07
ENSG00000236609	ZNF853	69.0143	1.36817	0.243934	5.60877	2.03769e-08	1.15654e-07
ENSG00000183495	EP400	568.913	0.812971	0.145037	5.60527	2.07927e-08	1.1791e-07
ENSG00000114270	COL7A1	189.415	1.79773	0.320752	5.60472	2.08596e-08	1.18238e-07
ENSG00000171631	P2RY6	23.7917	2.10669	0.375904	5.60431	2.09083e-08	1.18462e-07
ENSG00000129657	SEC14L1	654.566	1.02743	0.183575	5.59679	2.18352e-08	1.23659e-07
ENSG00000169902	TPST1	90.1594	1.14416	0.204532	5.59406	2.21822e-08	1.25569e-07
ENSG00000114127	XRN1	124.587	0.876453	0.156696	5.59335	2.22732e-08	1.26029e-07
ENSG00000133789	SWAP70	200.574	0.814442	0.145694	5.5901	2.26932e-08	1.28293e-07
ENSG00000148634	HERC4	100.392	0.945565	0.169305	5.58497	2.33744e-08	1.31855e-07
ENSG00000204673	AKT1S1	88.7082	0.980146	0.175537	5.58371	2.35443e-08	1.32663e-07
ENSG00000197976	AKAP17A	376.214	0.887301	0.158951	5.58224	2.37442e-08	1.33693e-07
ENSG00000140830	TXNL4B	90.2675	1.00139	0.179467	5.57978	2.40824e-08	1.35435e-07
ENSG00000109814	UGDH	2269.06	0.407308	0.0730176	5.57822	2.42989e-08	1.36593e-07
ENSG00000163959	SLC51A	158.23	0.979679	0.175763	5.57385	2.49167e-08	1.39883e-07
ENSG00000254470	AP5B1	115.167	0.967821	0.173728	5.57088	2.5345e-08	1.42225e-07
ENSG00000121879	PIK3CA	84.0382	1.06678	0.191505	5.57051	2.53988e-08	1.42465e-07
ENSG00000022840	RNF10	502.419	0.710876	0.12769	5.56719	2.58874e-08	1.45017e-07
ENSG00000146731	CCT6A	3601.79	0.334627	0.0601151	5.56644	2.59999e-08	1.45583e-07
ENSG00000104450	SPAG1	110.924	0.90598	0.163051	5.55642	2.75364e-08	1.53653e-07
ENSG00000115677	HDLBP	2349.58	0.499811	0.0899753	5.55498	2.77644e-08	1.54859e-07
ENSG00000182326	C1S	42.3838	1.53868	0.277231	5.55015	2.85419e-08	1.58989e-07
ENSG00000164715	LMTK2	41.7659	1.65706	0.298901	5.54383	2.95927e-08	1.64636e-07
ENSG00000134698	AGO4	49.1197	1.3202	0.23814	5.54382	2.95939e-08	1.64636e-07
ENSG00000134108	ARL8B	410.392	0.508877	0.0918155	5.54238	2.98382e-08	1.65924e-07
ENSG00000168137	SETD5	1109.65	0.7346	0.1326	5.53997	3.02522e-08	1.67936e-07
ENSG00000143622	RIT1	68.6765	1.14031	0.205837	5.53986	3.02715e-08	1.67971e-07
ENSG00000251022	THAP9-AS1	58.9633	1.32156	0.238626	5.53818	3.05634e-08	1.69518e-07
ENSG00000226380	MIR29A	27.9213	2.27637	0.411257	5.53514	3.10986e-08	1.72412e-07
ENSG00000068323	TFE3	170.459	1.00637	0.181914	5.53211	3.16407e-08	1.75116e-07
ENSG00000100644	HIF1A	472.394	0.612866	0.110798	5.5314	3.1769e-08	1.75751e-07
ENSG00000134317	GRHL1	79.5113	1.18932	0.215074	5.52981	3.20585e-08	1.77201e-07
ENSG00000152223	EPG5	62.1232	1.35349	0.244768	5.52966	3.20844e-08	1.77268e-07
ENSG00000155506	LARP1	2590.42	0.520476	0.0942578	5.52183	3.3548e-08	1.85275e-07
ENSG00000071189	SNX13	241.176	0.755224	0.136815	5.52005	3.38902e-08	1.87005e-07
ENSG00000138131	LOXL4	77.1605	1.19775	0.217121	5.51653	3.45765e-08	1.90629e-07
ENSG00000103978	TMEM87A	805.566	0.789599	0.143412	5.50582	3.67456e-08	2.02242e-07
ENSG00000112200	ZNF451	519.554	0.655149	0.119051	5.50309	3.73196e-08	2.05313e-07
ENSG00000133706	LARS	507.06	0.502067	0.0912619	5.50139	3.76812e-08	2.07126e-07
ENSG00000144028	SNRNP200	1195.45	0.524001	0.0952813	5.49951	3.80845e-08	2.09254e-07
ENSG00000171311	EXOSC1	184.039	0.744439	0.13552	5.49319	3.9473e-08	2.16422e-07
ENSG00000155329	ZCCHC10	439.313	0.957313	0.174281	5.49292	3.95341e-08	2.16665e-07
ENSG00000198839	ZNF277	114.732	1.01798	0.185374	5.49151	3.98514e-08	2.18311e-07
ENSG00000153922	CHD1	639.763	0.471568	0.0858754	5.49131	3.98962e-08	2.18464e-07
ENSG00000114942	EEF1B2	5448.5	0.356645	0.0649645	5.48984	4.02308e-08	2.20109e-07
ENSG00000100418	DESI1	210.168	0.86479	0.157596	5.48739	4.07927e-08	2.22875e-07
ENSG00000129472	RAB2B	141.441	0.919472	0.167563	5.48733	4.08055e-08	2.22875e-07
ENSG00000006606	CCL26	16.9733	6.12852	1.11724	5.48539	4.12552e-08	2.25236e-07
ENSG00000072274	TFRC	1281.19	0.449467	0.0819705	5.48328	4.17507e-08	2.27845e-07
ENSG00000130830	MPP1	28.28	1.78015	0.324826	5.48033	4.2454e-08	2.31487e-07
ENSG00000014919	COX15	219.411	0.675236	0.123228	5.47955	4.26408e-08	2.3231e-07
ENSG00000104960	PTOV1	227.971	0.638776	0.116629	5.47698	4.32645e-08	2.3531e-07
ENSG00000163818	LZTFL1	55.4504	1.40663	0.257166	5.46974	4.50707e-08	2.44927e-07
ENSG00000106153	CHCHD2	9859.7	0.595935	0.108993	5.46765	4.56044e-08	2.47723e-07
ENSG00000115568	ZNF142	103.86	1.02936	0.188348	5.46518	4.62437e-08	2.50985e-07
ENSG00000121671	CRY2	77.3287	1.07507	0.196724	5.46485	4.63285e-08	2.51339e-07
ENSG00000113595	TRIM23	35.3819	1.36927	0.250591	5.46418	4.65059e-08	2.52195e-07
ENSG00000260923	AC137934.1	14.5706	3.6838	0.674636	5.46042	4.74999e-08	2.57261e-07
ENSG00000077157	PPP1R12B	80.1072	1.12363	0.205816	5.45939	4.77761e-08	2.58648e-07
ENSG00000114030	KPNA1	290.338	0.680478	0.124664	5.45848	4.80234e-08	2.59769e-07
ENSG00000100867	DHRS2	5347.85	0.577229	0.105752	5.45834	4.80615e-08	2.59866e-07
ENSG00000178498	DTX3	111.614	1.31155	0.24032	5.45754	4.8279e-08	2.60933e-07
ENSG00000144815	NXPE3	47.0986	1.38154	0.253162	5.45714	4.83868e-08	2.61406e-07
ENSG00000196428	TSC22D2	125.935	0.802684	0.1471	5.45674	4.84969e-08	2.61891e-07
ENSG00000153443	UBALD1	111.497	1.04006	0.190648	5.45538	4.88692e-08	2.63792e-07
ENSG00000160062	ZBTB8A	75.7577	1.17495	0.2155	5.45222	4.97454e-08	2.68296e-07
ENSG00000173064	HECTD4	106.241	1.04549	0.191788	5.45128	5.00079e-08	2.69599e-07
ENSG00000135127	CCDC64	50.9998	1.24817	0.228984	5.45093	5.01071e-08	2.70022e-07
ENSG00000074356	C17orf85	236.65	0.715205	0.131319	5.4463	5.14294e-08	2.76916e-07
ENSG00000233016	SNHG7	627.836	0.622178	0.114296	5.44357	5.22243e-08	2.80844e-07
ENSG00000076706	MCAM	52.0346	2.64853	0.487174	5.43651	5.4334e-08	2.91637e-07
ENSG00000100330	MTMR3	89.4561	1.14282	0.210237	5.43586	5.4533e-08	2.92407e-07
ENSG00000133606	MKRN1	276.046	0.722438	0.132946	5.43406	5.5087e-08	2.95254e-07
ENSG00000143379	SETDB1	224.803	0.847321	0.156102	5.428	5.69885e-08	3.05193e-07
ENSG00000140265	ZSCAN29	204.232	0.797678	0.146959	5.42789	5.70236e-08	3.05254e-07
ENSG00000131504	DIAPH1	888.035	0.512115	0.0943741	5.42644	5.74901e-08	3.07623e-07
ENSG00000055332	EIF2AK2	660.053	0.568834	0.104831	5.42621	5.75638e-08	3.0789e-07
ENSG00000171606	ZNF274	67.1476	1.29557	0.238859	5.42401	5.82775e-08	3.11578e-07
ENSG00000077044	DGKD	340.457	0.614021	0.113239	5.42234	5.88252e-08	3.14116e-07
ENSG00000159352	PSMD4	1098.74	0.56286	0.103814	5.42181	5.89974e-08	3.14775e-07
ENSG00000124151	NCOA3	309.872	0.683271	0.126055	5.42044	5.94538e-08	3.16948e-07
ENSG00000116176	TPSG1	4.58303	6.48109	1.19633	5.41746	6.04501e-08	3.22126e-07
ENSG00000115464	USP34	1307.31	0.478372	0.0883366	5.41533	6.1176e-08	3.25725e-07
ENSG00000213614	HEXA	308.102	0.496863	0.0917649	5.41452	6.14525e-08	3.27062e-07
ENSG00000196267	ZNF836	41.2424	1.6548	0.305906	5.40952	6.31932e-08	3.35772e-07
ENSG00000155229	MMS19	595.125	0.727773	0.134663	5.40441	6.50217e-08	3.45062e-07
ENSG00000162695	SLC30A7	343.437	0.675419	0.124995	5.40358	6.53247e-08	3.46242e-07
ENSG00000162290	DCP1A	205.022	0.848194	0.157107	5.39884	6.70722e-08	3.55067e-07
ENSG00000169826	CSGALNACT2	88.363	1.34175	0.248733	5.39435	6.87702e-08	3.63608e-07
ENSG00000100316	RPL3	2391.41	0.459022	0.085158	5.39024	7.03635e-08	3.71424e-07
ENSG00000116731	PRDM2	116.748	1.0632	0.197352	5.38732	7.15156e-08	3.77042e-07
ENSG00000106459	NRF1	80.7685	1.06925	0.198593	5.38415	7.27892e-08	3.83443e-07
ENSG00000182149	IST1	743.873	0.494968	0.0919381	5.38371	7.29671e-08	3.84224e-07
ENSG00000083799	CYLD	76.7977	1.08103	0.200995	5.37839	7.51564e-08	3.95429e-07
ENSG00000213995	CARKD	117.688	1.25663	0.233764	5.37563	7.63142e-08	4.00983e-07
ENSG00000025800	KPNA6	841.507	0.497548	0.0925612	5.37535	7.64362e-08	4.01344e-07
ENSG00000183020	AP2A2	260.585	0.715535	0.133167	5.3732	7.73502e-08	4.05154e-07
ENSG00000057757	PITHD1	146.225	0.912269	0.169872	5.37032	7.8597e-08	4.11351e-07
ENSG00000133884	DPF2	152.363	0.926309	0.17253	5.36898	7.91845e-08	4.14257e-07
ENSG00000108510	MED13	438.168	0.65351	0.121727	5.36865	7.93298e-08	4.1485e-07
ENSG00000177666	PNPLA2	211.886	0.667274	0.124375	5.365	8.09511e-08	4.22906e-07
ENSG00000072071	LPHN1	22.1773	2.00463	0.373687	5.36447	8.11872e-08	4.23704e-07
ENSG00000100225	FBXO7	440.334	0.494156	0.0921193	5.36431	8.12598e-08	4.23911e-07
ENSG00000100207	TCF20	236.491	0.8057	0.150206	5.36397	8.14109e-08	4.24528e-07
ENSG00000072401	UBE2D1	76.7889	1.00726	0.187951	5.35915	8.3615e-08	4.35318e-07
ENSG00000151498	ACAD8	78.4578	1.16649	0.217824	5.3552	8.54614e-08	4.44572e-07
ENSG00000095564	BTAF1	214.115	0.882369	0.164811	5.35381	8.61209e-08	4.47641e-07
ENSG00000163516	ANKZF1	169.837	0.85384	0.159589	5.35026	8.78288e-08	4.56335e-07
ENSG00000135956	TMEM127	502.319	0.641426	0.120069	5.34215	9.18502e-08	4.76078e-07
ENSG00000102554	KLF5	28.8983	2.24793	0.420836	5.34157	9.21426e-08	4.77402e-07
ENSG00000245532	NEAT1	7631.47	2.21663	0.415103	5.33996	9.29653e-08	4.81471e-07
ENSG00000167986	DDB1	1240.11	0.508756	0.095423	5.33159	9.7355e-08	5.03398e-07
ENSG00000174652	ZNF266	64.8462	1.27446	0.239118	5.32985	9.82962e-08	5.07857e-07
ENSG00000261609	GAN	134.27	0.856566	0.160723	5.32946	9.85027e-08	5.0872e-07
ENSG00000165997	ARL5B	388.766	0.738157	0.138626	5.32482	1.01051e-07	5.20494e-07
ENSG00000107862	GBF1	216.864	0.788033	0.148056	5.32254	1.02328e-07	5.26787e-07
ENSG00000174938	SEZ6L2	184.623	0.800294	0.150457	5.3191	1.04284e-07	5.36429e-07
ENSG00000138592	USP8	723.069	0.589523	0.110859	5.31777	1.05047e-07	5.40139e-07
ENSG00000129245	FXR2	232.517	0.909605	0.17106	5.31747	1.05219e-07	5.40809e-07
ENSG00000143457	GOLPH3L	126.662	0.718474	0.135141	5.31648	1.05793e-07	5.43545e-07
ENSG00000114544	SLC41A3	224.721	0.702778	0.1323	5.31199	1.08435e-07	5.56675e-07
ENSG00000111707	SUDS3	437.786	0.510842	0.0962013	5.31014	1.09544e-07	5.61919e-07
ENSG00000123106	CCDC91	214.321	0.873709	0.164584	5.3086	1.10472e-07	5.66005e-07
ENSG00000073417	PDE8A	84.2643	1.05258	0.198579	5.30058	1.15436e-07	5.905e-07
ENSG00000104957	CCDC130	118.927	0.934549	0.17644	5.29669	1.17924e-07	6.02271e-07
ENSG00000160584	SIK3	119.432	1.2421	0.234515	5.29645	1.18074e-07	6.02798e-07
ENSG00000140526	ABHD2	564.161	0.54786	0.103509	5.29287	1.20408e-07	6.13988e-07
ENSG00000146278	PNRC1	157.918	1.85263	0.35007	5.29218	1.20867e-07	6.1608e-07
ENSG00000047346	FAM214A	57.8693	1.2286	0.232246	5.29009	1.22255e-07	6.2291e-07
ENSG00000120519	SLC10A7	72.2587	1.19269	0.225514	5.28874	1.2316e-07	6.27273e-07
ENSG00000136888	ATP6V1G1	1172.73	0.424181	0.080225	5.28738	1.24078e-07	6.31702e-07
ENSG00000092421	SEMA6A	74.1673	1.28362	0.243006	5.28228	1.27585e-07	6.48785e-07
ENSG00000095574	IKZF5	66.8194	1.10053	0.208376	5.28148	1.28145e-07	6.50865e-07
ENSG00000161647	MPP3	20.5317	2.38447	0.451697	5.27891	1.29957e-07	6.58729e-07
ENSG00000151657	KIN	298.821	0.611589	0.115857	5.27885	1.29999e-07	6.58729e-07
ENSG00000141580	WDR45B	746.802	0.487125	0.0923024	5.27749	1.30964e-07	6.63355e-07
ENSG00000046604	DSG2	381.035	0.575751	0.109136	5.27554	1.32364e-07	6.69918e-07
ENSG00000003756	RBM5	296.883	0.784638	0.148923	5.26876	1.37351e-07	6.93258e-07
ENSG00000008128	CDK11A	422.089	0.794295	0.150795	5.26737	1.38393e-07	6.98245e-07
ENSG00000099804	CDC34	746.891	0.665639	0.1266	5.2578	1.45791e-07	7.32417e-07
ENSG00000107249	GLIS3	47.9301	1.64271	0.312502	5.25662	1.46728e-07	7.36265e-07
ENSG00000136895	GARNL3	39.5135	1.53574	0.292208	5.25565	1.47505e-07	7.39874e-07
ENSG00000102580	DNAJC3	1125.91	0.487395	0.0928307	5.25036	1.51799e-07	7.60231e-07
ENSG00000163681	SLMAP	312.441	0.634482	0.120909	5.24761	1.54081e-07	7.70464e-07
ENSG00000109846	CRYAB	18.5723	2.47263	0.471213	5.24737	1.54282e-07	7.7117e-07
ENSG00000112715	VEGFA	202.362	1.01228	0.192984	5.2454	1.55944e-07	7.78876e-07
ENSG00000166169	POLL	89.9109	1.12813	0.215405	5.23727	1.62971e-07	8.11771e-07
ENSG00000137073	UBAP2	528.458	0.494142	0.0943587	5.23684	1.63345e-07	8.13323e-07
ENSG00000143514	TP53BP2	120.89	0.825035	0.157821	5.22768	1.7165e-07	8.527e-07
ENSG00000163161	ERCC3	273.419	0.663827	0.127048	5.22501	1.74149e-07	8.64116e-07
ENSG00000040531	CTNS	118.506	0.973368	0.186323	5.2241	1.75005e-07	8.67693e-07
ENSG00000008405	CRY1	124.687	0.872053	0.167024	5.22114	1.77827e-07	8.80671e-07
ENSG00000185158	LRRC37B	43.1371	1.42741	0.27343	5.22037	1.78565e-07	8.83987e-07
ENSG00000158023	WDR66	12.079	3.0509	0.584924	5.21588	1.82944e-07	9.04968e-07
ENSG00000131408	NR1H2	99.8622	0.931496	0.178687	5.213	1.85808e-07	9.18433e-07
ENSG00000240849	TMEM189	207.94	0.701325	0.13462	5.20965	1.89195e-07	9.34457e-07
ENSG00000075568	TMEM131	417.434	0.56132	0.107801	5.20701	1.9191e-07	9.47507e-07
ENSG00000136908	DPM2	130.172	0.984313	0.189417	5.19654	2.03028e-07	9.99336e-07
ENSG00000110048	OSBP	229.237	0.876473	0.168827	5.19154	2.08558e-07	1.02499e-06
ENSG00000119688	ABCD4	203.594	0.958589	0.184721	5.1894	2.10977e-07	1.0357e-06
ENSG00000115758	ODC1	1494.13	0.64274	0.123923	5.18662	2.14147e-07	1.05086e-06
ENSG00000129460	NGDN	596.14	0.580584	0.111973	5.18503	2.15984e-07	1.05907e-06
ENSG00000170322	NFRKB	221.039	0.663137	0.127902	5.18474	2.16321e-07	1.06032e-06
ENSG00000272645	RP11-504P24.8	20.6548	2.15675	0.415994	5.18457	2.1651e-07	1.06084e-06
ENSG00000149308	NPAT	182.82	0.708285	0.136616	5.1845	2.16592e-07	1.06084e-06
ENSG00000115760	BIRC6	345.895	0.58608	0.113083	5.18272	2.18675e-07	1.06942e-06
ENSG00000241553	ARPC4	771.17	0.517037	0.0999998	5.17038	2.33617e-07	1.14076e-06
ENSG00000157483	MYO1E	160.867	0.795723	0.154013	5.16659	2.38407e-07	1.16371e-06
ENSG00000117139	KDM5B	239.696	0.682279	0.132095	5.16508	2.40339e-07	1.1727e-06
ENSG00000167721	TSR1	609.079	0.439013	0.085015	5.16395	2.4179e-07	1.17933e-06
ENSG00000107263	RAPGEF1	432.299	0.521489	0.101049	5.16075	2.45967e-07	1.19789e-06
ENSG00000119537	KDSR	235.967	0.636651	0.123439	5.15761	2.50117e-07	1.21719e-06
ENSG00000197948	FCHSD1	79.2114	1.14741	0.222947	5.14656	2.6531e-07	1.28748e-06
ENSG00000151092	NGLY1	204.776	0.567503	0.11027	5.1465	2.65391e-07	1.28748e-06
ENSG00000170677	SOCS6	167.921	0.7298	0.141808	5.14638	2.65561e-07	1.28748e-06
ENSG00000172830	SSH3	73.9497	1.21855	0.23687	5.14439	2.68394e-07	1.30073e-06
ENSG00000184863	RBM33	370.239	0.65844	0.128083	5.14072	2.73686e-07	1.32489e-06
ENSG00000204348	DXO	112.445	0.898493	0.174789	5.14043	2.7411e-07	1.32644e-06
ENSG00000214021	TTLL3	44.9716	1.72017	0.335066	5.13384	2.83882e-07	1.37116e-06
ENSG00000164346	NSA2	1730.35	0.535728	0.104359	5.1335	2.84407e-07	1.37318e-06
ENSG00000105879	CBLL1	82.1726	0.877191	0.170944	5.13146	2.87505e-07	1.38606e-06
ENSG00000003989	SLC7A2	101.165	0.887992	0.173131	5.12902	2.91261e-07	1.40312e-06
ENSG00000221968	FADS3	57.3618	1.13487	0.221317	5.12781	2.93129e-07	1.41106e-06
ENSG00000117984	CTSD	1941.36	0.566195	0.110433	5.12707	2.94285e-07	1.4161e-06
ENSG00000189339	SLC35E2B	266.914	0.872533	0.170279	5.12415	2.98882e-07	1.43769e-06
ENSG00000123091	RNF11	237.042	0.604083	0.117916	5.12301	3.00696e-07	1.44587e-06
ENSG00000261770	CTC-459F4.1	9.40449	3.41059	0.665972	5.12121	3.03573e-07	1.45917e-06
ENSG00000036054	TBC1D23	126.14	0.962246	0.187946	5.11979	3.05882e-07	1.46972e-06
ENSG00000173706	HEG1	155.658	0.808276	0.157915	5.11841	3.08125e-07	1.47994e-06
ENSG00000004478	FKBP4	411.529	0.654392	0.127879	5.11729	3.09961e-07	1.48765e-06
ENSG00000105197	TIMM50	390.077	0.46642	0.0911553	5.11676	3.10831e-07	1.49127e-06
ENSG00000169188	APEX2	147.383	1.01778	0.199007	5.11428	3.14945e-07	1.51045e-06
ENSG00000166454	ATMIN	336.534	0.514956	0.100719	5.11279	3.17427e-07	1.52122e-06
ENSG00000197150	ABCB8	40.5248	1.4268	0.279134	5.11153	3.19568e-07	1.53034e-06
ENSG00000099889	ARVCF	78.334	1.20904	0.236549	5.11116	3.20188e-07	1.53274e-06
ENSG00000112578	BYSL	180.791	0.765423	0.149808	5.10937	3.2324e-07	1.54621e-06
ENSG00000197579	TOPORS	373.102	0.551305	0.107986	5.10534	3.30204e-07	1.57835e-06
ENSG00000169118	CSNK1G1	215.874	0.870333	0.170634	5.1006	3.38584e-07	1.61481e-06
ENSG00000134070	IRAK2	59.9466	1.49939	0.29415	5.09736	3.44421e-07	1.64205e-06
ENSG00000159202	UBE2Z	681.299	0.810729	0.159074	5.09657	3.45872e-07	1.64835e-06
ENSG00000142937	RPS8	11621.1	0.383302	0.0752195	5.09579	3.47297e-07	1.65392e-06
ENSG00000105402	NAPA	286.714	0.715951	0.14054	5.09428	3.50072e-07	1.66652e-06
ENSG00000110713	NUP98	213.869	0.655959	0.128942	5.08722	3.63347e-07	1.72781e-06
ENSG00000141452	C18orf8	76.9425	1.00529	0.197709	5.0847	3.68213e-07	1.74966e-06
ENSG00000173418	NAA20	482.021	0.551381	0.108544	5.07979	3.77843e-07	1.79211e-06
ENSG00000104980	TIMM44	310.25	0.657784	0.129587	5.07599	3.85489e-07	1.8257e-06
ENSG00000121716	PILRB	178.443	1.03593	0.204087	5.0759	3.85667e-07	1.82587e-06
ENSG00000102100	SLC35A2	220.604	0.792904	0.156304	5.07282	3.91971e-07	1.85435e-06
ENSG00000129116	PALLD	10.3232	3.22288	0.635446	5.07183	3.94001e-07	1.86327e-06
ENSG00000164924	YWHAZ	1062.53	0.434616	0.085744	5.06877	4.00404e-07	1.89147e-06
ENSG00000168826	ZBTB49	22.8853	1.74456	0.344209	5.06831	4.01367e-07	1.89511e-06
ENSG00000012822	CALCOCO1	12.5135	2.61825	0.516721	5.06704	4.04052e-07	1.90661e-06
ENSG00000116128	BCL9	124.314	1.08719	0.214676	5.06433	4.09849e-07	1.93255e-06
ENSG00000144029	MRPS5	957.77	0.407213	0.0804299	5.06295	4.12821e-07	1.94586e-06
ENSG00000112110	MRPL18	859.347	0.56387	0.111399	5.06171	4.15515e-07	1.95784e-06
ENSG00000115317	HTRA2	182.801	0.632728	0.125061	5.05937	4.20635e-07	1.98124e-06
ENSG00000061936	SFSWAP	485.453	0.634588	0.12546	5.05811	4.23435e-07	1.99297e-06
ENSG00000165392	WRN	155.908	0.741077	0.146562	5.05642	4.27199e-07	2.00922e-06
ENSG00000133265	HSPBP1	187.593	0.848781	0.16808	5.04985	4.4216e-07	2.07731e-06
ENSG00000042429	MED17	102.477	0.900529	0.178361	5.0489	4.44364e-07	2.08691e-06
ENSG00000159588	CCDC17	14.7862	2.21401	0.438532	5.04869	4.44857e-07	2.08846e-06
ENSG00000130741	EIF2S3	329.829	0.495321	0.0981572	5.0462	4.50683e-07	2.11351e-06
ENSG00000175866	BAIAP2	98.4849	1.15002	0.227987	5.04423	4.55343e-07	2.13459e-06
ENSG00000197712	FAM114A1	323.216	0.666991	0.132246	5.04355	4.56975e-07	2.14146e-06
ENSG00000258890	CEP95	286.459	0.619796	0.122978	5.03989	4.65792e-07	2.17882e-06
ENSG00000239665	RP11-295P9.3	20.144	2.2556	0.447794	5.03714	4.72535e-07	2.20876e-06
ENSG00000063587	ZNF275	84.6257	0.926837	0.184073	5.03518	4.77411e-07	2.23074e-06
ENSG00000090060	PAPOLA	1082.46	0.370379	0.0736209	5.0309	4.88188e-07	2.27862e-06
ENSG00000260852	FBXL19-AS1	42.9207	1.36494	0.271334	5.03046	4.89301e-07	2.28299e-06
ENSG00000140848	CPNE2	8.14736	4.29605	0.8543	5.02873	4.93728e-07	2.30198e-06
ENSG00000197852	FAM212B	50.8124	1.07089	0.212966	5.02847	4.94396e-07	2.30426e-06
ENSG00000147162	OGT	181.478	1.00052	0.198996	5.02781	4.961e-07	2.31137e-06
ENSG00000143850	PLEKHA6	152.828	0.701177	0.139836	5.01427	5.3234e-07	2.47664e-06
ENSG00000127527	EPS15L1	141.185	0.782991	0.156175	5.01355	5.34362e-07	2.48515e-06
ENSG00000119414	PPP6C	322.306	0.557999	0.111304	5.01327	5.35121e-07	2.48778e-06
ENSG00000152242	C18orf25	79.2491	1.16057	0.231509	5.01307	5.35677e-07	2.48857e-06
ENSG00000109089	CDR2L	87.7898	0.953686	0.190257	5.01263	5.36907e-07	2.49339e-06
ENSG00000110321	EIF4G2	4340.5	0.361769	0.0721842	5.01175	5.39383e-07	2.50309e-06
ENSG00000136986	DERL1	341.541	0.773997	0.15446	5.01099	5.41497e-07	2.51199e-06
ENSG00000120008	WDR11	103.286	0.85567	0.170872	5.00766	5.50958e-07	2.55404e-06
ENSG00000056097	ZFR	1547.21	0.533683	0.106582	5.00725	5.52128e-07	2.55855e-06
ENSG00000126777	KTN1	4331.72	0.457926	0.0914908	5.00516	5.58158e-07	2.58278e-06
ENSG00000049167	ERCC8	53.2508	1.25677	0.251228	5.00253	5.6584e-07	2.61271e-06
ENSG00000131100	ATP6V1E1	588.169	0.533294	0.10665	5.00043	5.72039e-07	2.63944e-06
ENSG00000128590	DNAJB9	300.557	1.76712	0.35347	4.99934	5.75281e-07	2.65345e-06
ENSG00000165661	QSOX2	177.705	0.846819	0.169447	4.99753	5.80697e-07	2.67747e-06
ENSG00000121579	NAA50	582.58	0.433385	0.0867633	4.99502	5.88291e-07	2.71152e-06
ENSG00000112078	KCTD20	258.247	0.668528	0.133849	4.99465	5.89426e-07	2.71481e-06
ENSG00000071626	DAZAP1	1336.66	0.410613	0.0822409	4.9928	5.95102e-07	2.73802e-06
ENSG00000125037	EMC3	449.29	0.60583	0.121356	4.99219	5.96988e-07	2.74572e-06
ENSG00000111981	ULBP1	4.52948	6.0723	1.21656	4.99137	5.99513e-07	2.75635e-06
ENSG00000124177	CHD6	379.403	0.636446	0.127517	4.99105	6.00513e-07	2.75975e-06
ENSG00000105656	ELL	77.8049	1.07873	0.216134	4.991	6.00679e-07	2.75975e-06
ENSG00000140829	DHX38	661.692	0.600004	0.120221	4.99084	6.01184e-07	2.76108e-06
ENSG00000115145	STAM2	141.232	0.735017	0.14734	4.98858	6.08236e-07	2.79148e-06
ENSG00000172725	CORO1B	151.454	0.728395	0.146104	4.98545	6.18184e-07	2.83411e-06
ENSG00000225828	FAM229A	24.7308	1.98426	0.398348	4.98122	6.31853e-07	2.89369e-06
ENSG00000044574	HSPA5	25857.6	0.502764	0.100966	4.97955	6.37325e-07	2.91772e-06
ENSG00000121903	ZSCAN20	17.1949	2.23881	0.449687	4.97859	6.40489e-07	2.92908e-06
ENSG00000198853	RUSC2	23.5008	1.79556	0.360676	4.97831	6.41408e-07	2.93225e-06
ENSG00000111737	RAB35	215.246	0.645723	0.12971	4.97819	6.41828e-07	2.93313e-06
ENSG00000126653	NSRP1	708.333	0.604928	0.121518	4.97811	6.4208e-07	2.93324e-06
ENSG00000148399	DPH7	214.424	0.728533	0.146382	4.97693	6.45995e-07	2.95008e-06
ENSG00000107581	EIF3A	4320.67	0.598316	0.120254	4.97545	6.50949e-07	2.96955e-06
ENSG00000165030	NFIL3	209.615	0.767816	0.154357	4.97427	6.5493e-07	2.98666e-06
ENSG00000122008	POLK	80.9372	0.893936	0.179812	4.97152	6.64309e-07	3.02729e-06
ENSG00000198301	SDAD1	644.118	0.443519	0.0892374	4.9701	6.69185e-07	3.04843e-06
ENSG00000152683	SLC30A6	195.996	0.71496	0.144	4.965	6.87005e-07	3.1274e-06
ENSG00000137074	APTX	213.801	0.698018	0.140615	4.96404	6.90428e-07	3.14187e-06
ENSG00000124164	VAPB	506.135	0.433077	0.0872501	4.96363	6.91885e-07	3.14739e-06
ENSG00000126458	RRAS	51.3998	1.15547	0.23287	4.96186	6.98217e-07	3.17182e-06
ENSG00000137474	MYO7A	123.425	1.11792	0.225311	4.96169	6.98827e-07	3.17338e-06
ENSG00000140463	BBS4	80.4504	0.947482	0.190975	4.96129	7.00271e-07	3.17882e-06
ENSG00000163660	CCNL1	487.714	0.651229	0.131335	4.95851	7.10345e-07	3.22001e-06
ENSG00000101350	KIF3B	776.978	0.419671	0.0846407	4.95826	7.1127e-07	3.22308e-06
ENSG00000129946	SHC2	38.8144	1.57361	0.317376	4.95818	7.11565e-07	3.22328e-06
ENSG00000186275	NBPF12	30.4725	2.23108	0.450507	4.95238	7.33108e-07	3.3197e-06
ENSG00000117758	STX12	120.837	0.791462	0.159901	4.9497	7.43289e-07	3.36226e-06
ENSG00000130584	ZBTB46	12.0437	2.96888	0.600016	4.948	7.49816e-07	3.38822e-06
ENSG00000047249	ATP6V1H	174.557	0.865775	0.174985	4.9477	7.50949e-07	3.39215e-06
ENSG00000077312	SNRPA	370.938	0.667766	0.135038	4.94501	7.61418e-07	3.43824e-06
ENSG00000272821	CTA-384D8.36	72.6602	1.00579	0.203433	4.94407	7.65075e-07	3.45355e-06
ENSG00000166913	YWHAB	5307.26	0.342375	0.0692604	4.94331	7.68077e-07	3.46589e-06
ENSG00000140943	MBTPS1	469.88	0.514375	0.104122	4.94013	7.80707e-07	3.51918e-06
ENSG00000105058	FAM32A	940.403	0.519192	0.10515	4.93764	7.90754e-07	3.56074e-06
ENSG00000189114	BLOC1S3	74.1572	1.04515	0.211728	4.93627	7.96326e-07	3.58333e-06
ENSG00000143093	STRIP1	265.876	0.571508	0.115799	4.93533	8.00139e-07	3.59798e-06
ENSG00000156873	PHKG2	171.603	0.782757	0.158725	4.93152	8.15941e-07	3.6652e-06
ENSG00000089876	DHX32	69.74	1.00058	0.20298	4.92945	8.24619e-07	3.7016e-06
ENSG00000128607	KLHDC10	222.839	0.590009	0.119702	4.92899	8.2654e-07	3.70835e-06
ENSG00000198146	ZNF770	532.036	0.577084	0.117144	4.92626	8.38182e-07	3.75595e-06
ENSG00000013583	HEBP1	290.45	0.557385	0.113181	4.92471	8.44872e-07	3.77806e-06
ENSG00000145734	BDP1	1333.96	0.553885	0.112521	4.92252	8.54378e-07	3.8166e-06
ENSG00000123636	BAZ2B	552.512	0.589794	0.119841	4.92147	8.58971e-07	3.83578e-06
ENSG00000140332	TLE3	41.8748	1.28421	0.261007	4.92022	8.64466e-07	3.8581e-06
ENSG00000213658	LAT	37.8344	1.54906	0.314838	4.9202	8.64566e-07	3.8581e-06
ENSG00000105887	MTPN	992.294	0.465965	0.0947349	4.91862	8.71569e-07	3.88801e-06
ENSG00000147202	DIAPH2	100.321	0.787675	0.160293	4.91397	8.92526e-07	3.97737e-06
ENSG00000197951	ZNF71	29.323	1.49508	0.304277	4.91355	8.94421e-07	3.98443e-06
ENSG00000137267	TUBB2A	292.522	0.851871	0.173493	4.91011	9.10273e-07	4.05225e-06
ENSG00000149823	VPS51	282.254	0.617545	0.125888	4.9055	9.31878e-07	4.14414e-06
ENSG00000076944	STXBP2	42.6043	1.18816	0.242299	4.90371	9.40443e-07	4.17935e-06
ENSG00000121289	CEP89	113.657	0.852816	0.173923	4.90342	9.41829e-07	4.18407e-06
ENSG00000116095	PLEKHA3	275.937	0.699164	0.142593	4.90321	9.42818e-07	4.18702e-06
ENSG00000179950	PUF60	445.866	0.579013	0.118212	4.89809	9.6774e-07	4.29005e-06
ENSG00000135047	CTSL	273.606	1.68139	0.343296	4.89777	9.69301e-07	4.29428e-06
ENSG00000095794	CREM	65.5888	1.1478	0.234412	4.89652	9.75503e-07	4.32028e-06
ENSG00000104427	ZC2HC1A	65.7666	1.29062	0.263687	4.89451	9.85529e-07	4.36168e-06
ENSG00000044090	CUL7	112.122	0.87901	0.179665	4.89248	9.95712e-07	4.40373e-06
ENSG00000138279	ANXA7	284.618	0.800685	0.163773	4.88899	1.01353e-06	4.48098e-06
ENSG00000124588	NQO2	143.79	0.685361	0.140193	4.88871	1.01501e-06	4.486e-06
ENSG00000137221	TJAP1	195.468	0.758798	0.155246	4.88773	1.02007e-06	4.50681e-06
ENSG00000116209	TMEM59	532.004	0.737015	0.15083	4.88639	1.02699e-06	4.53586e-06
ENSG00000109063	MYH3	21.8187	1.78	0.364393	4.88484	1.03512e-06	4.57018e-06
ENSG00000174943	KCTD13	40.3977	1.36259	0.279017	4.88352	1.04206e-06	4.59925e-06
ENSG00000019995	ZRANB1	216.261	0.633444	0.129739	4.88244	1.04782e-06	4.6215e-06
ENSG00000182899	RPL35A	6340.48	0.334281	0.068472	4.882	1.05013e-06	4.63013e-06
ENSG00000105699	LSR	450.688	0.56414	0.115561	4.88173	1.05158e-06	4.63492e-06
ENSG00000092931	MFSD11	226.267	0.661394	0.135522	4.88034	1.05903e-06	4.66619e-06
ENSG00000127311	HELB	21.4713	1.9336	0.396232	4.87998	1.06096e-06	4.6731e-06
ENSG00000100221	JOSD1	202.289	0.780852	0.160016	4.87984	1.06174e-06	4.67493e-06
ENSG00000125730	C3	3517.33	0.493746	0.101198	4.87902	1.06613e-06	4.69265e-06
ENSG00000205595	AREGB	3.24411	6.17214	1.26508	4.87887	1.06695e-06	4.69465e-06
ENSG00000213593	TMX2	780.957	0.542367	0.111185	4.87808	1.07125e-06	4.71197e-06
ENSG00000041357	PSMA4	1458.94	0.370762	0.0760071	4.878	1.0717e-06	4.71232e-06
ENSG00000159461	AMFR	253.288	0.528131	0.108364	4.8737	1.09528e-06	4.80955e-06
ENSG00000166963	MAP1A	7.80893	4.65301	0.954719	4.8737	1.0953e-06	4.80955e-06
ENSG00000147894	C9orf72	20.542	1.78191	0.366176	4.86627	1.13723e-06	4.98351e-06
ENSG00000128908	INO80	270.72	0.531956	0.109352	4.86464	1.14665e-06	5.02135e-06
ENSG00000134278	SPIRE1	165.88	0.783996	0.161321	4.85984	1.17479e-06	5.14112e-06
ENSG00000104067	TJP1	300.022	0.66909	0.137901	4.85197	1.22244e-06	5.34238e-06
ENSG00000145817	YIPF5	555.707	0.549798	0.113421	4.8474	1.25092e-06	5.46316e-06
ENSG00000272661	RP4-548D19.3	14.5896	2.06535	0.42619	4.84608	1.25924e-06	5.49761e-06
ENSG00000118242	MREG	28.4488	1.74126	0.359435	4.84443	1.26978e-06	5.54176e-06
ENSG00000198742	SMURF1	64.2307	1.0814	0.223262	4.84366	1.2747e-06	5.56136e-06
ENSG00000160948	VPS28	383.999	0.526568	0.108762	4.84147	1.28883e-06	5.61919e-06
ENSG00000125351	UPF3B	534.809	0.550177	0.113673	4.84	1.29836e-06	5.65885e-06
ENSG00000196361	ELAVL3	22.7444	2.17776	0.450049	4.83895	1.30525e-06	5.68696e-06
ENSG00000175115	PACS1	110.625	0.894934	0.185038	4.83649	1.32154e-06	5.75597e-06
ENSG00000133131	MORC4	292.887	0.64618	0.133637	4.83532	1.32932e-06	5.7879e-06
ENSG00000112096	SOD2	686.137	0.621332	0.128523	4.83442	1.33536e-06	5.81029e-06
ENSG00000058063	ATP11B	104.639	0.980566	0.202967	4.83116	1.35738e-06	5.90209e-06
ENSG00000152433	ZNF547	16.0547	2.24137	0.463964	4.83091	1.35907e-06	5.90748e-06
ENSG00000166908	PIP4K2C	259.863	0.588236	0.121773	4.83061	1.36116e-06	5.91455e-06
ENSG00000173545	ZNF622	136.102	0.77018	0.15954	4.82751	1.3825e-06	6.00324e-06
ENSG00000178980	SEPW1	253.263	0.85836	0.177848	4.82637	1.39042e-06	6.03559e-06
ENSG00000261705	RP11-61A14.2	14.626	2.08735	0.432617	4.82494	1.40043e-06	6.07496e-06
ENSG00000167549	CORO6	9.28948	2.89282	0.599914	4.82206	1.42082e-06	6.16135e-06
ENSG00000187735	TCEA1	463.831	0.624023	0.12943	4.82133	1.42601e-06	6.18176e-06
ENSG00000126767	ELK1	19.4282	1.85512	0.385183	4.8162	1.46317e-06	6.33648e-06
ENSG00000113575	PPP2CA	665.682	0.510896	0.106085	4.81592	1.46522e-06	6.34321e-06
ENSG00000115944	COX7A2L	565.997	0.542961	0.112752	4.81552	1.46816e-06	6.35384e-06
ENSG00000132912	DCTN4	254.79	0.740019	0.153802	4.81149	1.49806e-06	6.47452e-06
ENSG00000113070	HBEGF	36.2064	1.88826	0.392465	4.81127	1.49972e-06	6.47955e-06
ENSG00000166579	NDEL1	306.841	0.619563	0.128851	4.80838	1.52157e-06	6.56953e-06
ENSG00000074410	CA12	3.68665	5.99453	1.24698	4.80724	1.53029e-06	6.60277e-06
ENSG00000160691	SHC1	145.903	0.758407	0.157816	4.80563	1.54261e-06	6.65372e-06
ENSG00000144713	RPL32	7361.06	0.390149	0.0812094	4.80424	1.55342e-06	6.69586e-06
ENSG00000084072	PPIE	75.1604	0.960717	0.200177	4.79935	1.59184e-06	6.85459e-06
ENSG00000005238	FAM214B	35.0367	1.68412	0.351106	4.79662	1.61365e-06	6.93925e-06
ENSG00000104290	FZD3	136.547	0.70137	0.14628	4.79472	1.62906e-06	7.00318e-06
ENSG00000111641	NOP2	396.158	0.513885	0.107244	4.79173	1.65352e-06	7.10122e-06
ENSG00000137869	CYP19A1	109.07	0.853797	0.178244	4.79006	1.66735e-06	7.15349e-06
ENSG00000108829	LRRC59	962.845	0.36923	0.0771096	4.78838	1.68129e-06	7.21088e-06
ENSG00000158526	TSR2	257.745	0.562343	0.117509	4.78552	1.70543e-06	7.30955e-06
ENSG00000175582	RAB6A	572.321	0.563937	0.117872	4.78433	1.71557e-06	7.35057e-06
ENSG00000161653	NAGS	110.227	0.910094	0.1903	4.7824	1.7321e-06	7.41895e-06
ENSG00000135404	CD63	3405.25	0.427389	0.0893699	4.78225	1.73343e-06	7.42216e-06
ENSG00000272068	RP11-284F21.9	34.547	1.45271	0.30382	4.78148	1.74008e-06	7.44571e-06
ENSG00000162341	TPCN2	97.2941	1.00763	0.210906	4.77763	1.77373e-06	7.5844e-06
ENSG00000255112	CHMP1B	87.7696	0.997111	0.208722	4.77722	1.77736e-06	7.59262e-06
ENSG00000167258	CDK12	1037.72	0.468604	0.0982165	4.77113	1.83195e-06	7.81547e-06
ENSG00000112183	RBM24	68.7314	1.22452	0.256695	4.77034	1.83917e-06	7.8437e-06
ENSG00000125952	MAX	363.171	0.559618	0.117335	4.76941	1.8477e-06	7.87484e-06
ENSG00000148384	INPP5E	61.038	1.48966	0.312385	4.76868	1.8544e-06	7.89819e-06
ENSG00000103091	WDR59	243.804	0.541465	0.113551	4.76848	1.85622e-06	7.90335e-06
ENSG00000102978	POLR2C	364.386	0.516222	0.108286	4.76722	1.86785e-06	7.9476e-06
ENSG00000137941	TTLL7	5.64032	5.69822	1.19577	4.76533	1.88548e-06	8.01469e-06
ENSG00000074842	C19orf10	2864.16	0.523353	0.109856	4.76397	1.89821e-06	8.06613e-06
ENSG00000170542	SERPINB9	59.9708	1.09289	0.229559	4.76082	1.92812e-06	8.19008e-06
ENSG00000164880	INTS1	65.0672	0.989985	0.207947	4.76076	1.92865e-06	8.19008e-06
ENSG00000167962	ZNF598	189.879	0.633497	0.133089	4.75994	1.93648e-06	8.22064e-06
ENSG00000119541	VPS4B	323.602	0.586521	0.123313	4.75635	1.97128e-06	8.36286e-06
ENSG00000099860	GADD45B	67.213	1.22101	0.256723	4.75613	1.97342e-06	8.36918e-06
ENSG00000169249	ZRSR2	75.7966	0.966481	0.203248	4.75517	1.98278e-06	8.4006e-06
ENSG00000163468	CCT3	1945.4	0.359002	0.0755009	4.75494	1.98503e-06	8.40736e-06
ENSG00000168566	SNRNP48	568.031	0.516204	0.108619	4.75241	2.01005e-06	8.50499e-06
ENSG00000173846	PLK3	65.7823	1.20075	0.25268	4.75204	2.01371e-06	8.51765e-06
ENSG00000111775	COX6A1	750.252	0.527047	0.110919	4.75165	2.0176e-06	8.52574e-06
ENSG00000066135	KDM4A	273.531	0.624934	0.131562	4.75012	2.03292e-06	8.58484e-06
ENSG00000105373	GLTSCR2	359.758	0.588954	0.123993	4.74991	2.03506e-06	8.59108e-06
ENSG00000103249	CLCN7	164.275	0.663576	0.139725	4.74915	2.04269e-06	8.62046e-06
ENSG00000156127	BATF	21.0959	1.784	0.376097	4.74345	2.10113e-06	8.86131e-06
ENSG00000112511	PHF1	52.4513	1.51275	0.318995	4.74224	2.11369e-06	8.90553e-06
ENSG00000181392	SYNE4	88.3557	0.794466	0.167574	4.74099	2.12679e-06	8.95779e-06
ENSG00000101624	CEP76	36.1134	1.21695	0.256983	4.73554	2.18468e-06	9.18663e-06
ENSG00000248429	RP11-597D13.9	86.1867	1.01776	0.215056	4.73253	2.21739e-06	9.309e-06
ENSG00000101391	CDK5RAP1	185.303	0.642225	0.135966	4.72341	2.31922e-06	9.71122e-06
ENSG00000162994	CLHC1	42.6443	1.48556	0.314753	4.71977	2.36115e-06	9.88038e-06
ENSG00000018510	AGPS	387.375	0.48864	0.103537	4.71946	2.36472e-06	9.89211e-06
ENSG00000089009	RPL6	2652.16	0.41268	0.087494	4.71666	2.39743e-06	1.00257e-05
ENSG00000123395	C12orf44	271.497	0.775562	0.164444	4.71627	2.40207e-06	1.00418e-05
ENSG00000156256	USP16	727.212	0.480205	0.101869	4.71397	2.4294e-06	1.01462e-05
ENSG00000103168	TAF1C	226.119	1.23158	0.261472	4.71017	2.47504e-06	1.03335e-05
ENSG00000104218	CSPP1	267.259	0.654723	0.139019	4.70958	2.48226e-06	1.03603e-05
ENSG00000107140	TESK1	43.553	1.22177	0.259698	4.70458	2.54383e-06	1.0607e-05
ENSG00000125814	NAPB	76.6609	1.01846	0.216775	4.69824	2.62418e-06	1.09314e-05
ENSG00000228389	AC068039.4	11.0839	2.73029	0.581367	4.69633	2.64878e-06	1.10232e-05
ENSG00000196476	C20orf96	120.796	0.810474	0.172605	4.69554	2.65902e-06	1.10587e-05
ENSG00000105298	CACTIN	93.8617	0.879568	0.187442	4.69248	2.69919e-06	1.12221e-05
ENSG00000109917	ZNF259	262.387	0.617128	0.131524	4.69215	2.70347e-06	1.12363e-05
ENSG00000156639	ZFAND3	432.011	1.41446	0.301483	4.69168	2.70971e-06	1.12586e-05
ENSG00000134815	DHX34	78.5981	0.843516	0.179795	4.69154	2.7115e-06	1.12624e-05
ENSG00000175390	EIF3F	301.944	0.55327	0.117935	4.69132	2.71444e-06	1.1271e-05
ENSG00000100100	PIK3IP1	18.14	1.90333	0.406241	4.68523	2.79641e-06	1.15815e-05
ENSG00000092020	PPP2R3C	326.451	0.605099	0.1292	4.68344	2.82101e-06	1.16797e-05
ENSG00000151779	NBAS	261.574	0.683986	0.146217	4.67786	2.89879e-06	1.19786e-05
ENSG00000065000	AP3D1	3135.08	0.413999	0.0885443	4.67561	2.9308e-06	1.20954e-05
ENSG00000122042	UBL3	109.383	0.867547	0.185679	4.67229	2.97853e-06	1.22845e-05
ENSG00000112787	FBRSL1	207.503	0.674559	0.144424	4.67069	3.00186e-06	1.23755e-05
ENSG00000152484	USP12	171.841	0.712704	0.152594	4.67058	3.00347e-06	1.23755e-05
ENSG00000181722	ZBTB20	109.445	1.04714	0.224462	4.66512	3.08434e-06	1.26763e-05
ENSG00000007384	RHBDF1	66.4067	1.38	0.296038	4.66156	3.13821e-06	1.28896e-05
ENSG00000196712	NF1	616.817	0.573977	0.123139	4.66122	3.14345e-06	1.29069e-05
ENSG00000146457	WTAP	422.867	0.519344	0.111486	4.65839	3.18687e-06	1.30769e-05
ENSG00000223501	VPS52	123.253	0.744092	0.159897	4.65358	3.26218e-06	1.33774e-05
ENSG00000167193	CRK	302.607	0.625069	0.134324	4.65344	3.26444e-06	1.33817e-05
ENSG00000160211	G6PD	241.627	0.669851	0.143949	4.65338	3.26531e-06	1.33817e-05
ENSG00000087191	PSMC5	965.419	0.514662	0.110635	4.65187	3.28935e-06	1.34674e-05
ENSG00000197971	MBP	146.783	0.678291	0.14608	4.64329	3.42908e-06	1.39995e-05
ENSG00000109118	PHF12	162.373	0.650128	0.140039	4.64248	3.44244e-06	1.40452e-05
ENSG00000007047	MARK4	164.152	0.785096	0.169176	4.64071	3.47206e-06	1.41571e-05
ENSG00000111684	LPCAT3	684.453	0.521345	0.112364	4.63978	3.48778e-06	1.42167e-05
ENSG00000005339	CREBBP	442.628	0.553414	0.119295	4.63905	3.50017e-06	1.42627e-05
ENSG00000241258	CRCP	155.671	0.639508	0.137914	4.637	3.53497e-06	1.44e-05
ENSG00000112592	TBP	71.1491	0.995472	0.214705	4.63646	3.54431e-06	1.44289e-05
ENSG00000228253	MT-ATP8	94210.6	1.14108	0.246171	4.63533	3.56368e-06	1.45032e-05
ENSG00000241635	UGT1A8	116.297	0.921139	0.198773	4.63412	3.58467e-06	1.4584e-05
ENSG00000270949	RP11-288H12.4	72.9849	0.953372	0.205846	4.63148	3.63061e-06	1.47663e-05
ENSG00000101457	DNTTIP1	498.032	0.57318	0.123811	4.62946	3.66613e-06	1.4906e-05
ENSG00000119318	RAD23B	759.97	0.442571	0.0956238	4.62826	3.68758e-06	1.49838e-05
ENSG00000150961	SEC24D	245.494	0.82782	0.178957	4.6258	3.73162e-06	1.51484e-05
ENSG00000151348	EXT2	126.689	0.668035	0.144456	4.62449	3.75525e-06	1.52348e-05
ENSG00000106258	CYP3A5	50.2635	1.22489	0.265083	4.62077	3.8231e-06	1.55051e-05
ENSG00000266538	RP11-385D13.3	26.6161	2.05011	0.443961	4.61778	3.87869e-06	1.57207e-05
ENSG00000158869	FCER1G	16.2902	1.94261	0.420794	4.61654	3.90182e-06	1.58095e-05
ENSG00000173933	RBM4	132.42	1.01112	0.219195	4.61288	3.97124e-06	1.60706e-05
ENSG00000164070	HSPA4L	608.674	0.697934	0.151325	4.61215	3.98533e-06	1.61175e-05
ENSG00000110075	PPP6R3	380.267	0.615821	0.133535	4.61169	3.99399e-06	1.61474e-05
ENSG00000103111	MON1B	269.941	0.541262	0.117383	4.61109	4.00562e-06	1.61894e-05
ENSG00000085662	AKR1B1	418.264	0.530547	0.115089	4.60989	4.02885e-06	1.62782e-05
ENSG00000157895	C12orf43	160.428	0.877658	0.190467	4.60793	4.06705e-06	1.64168e-05
ENSG00000267519	MIR24-2	23.2469	1.95589	0.424633	4.60606	4.10373e-06	1.65527e-05
ENSG00000137409	MTCH1	768.291	0.525171	0.114068	4.604	4.14446e-06	1.67034e-05
ENSG00000019485	PRDM11	61.1206	1.26353	0.274512	4.60283	4.16793e-06	1.67771e-05
ENSG00000143344	RGL1	130.99	0.84193	0.182988	4.60102	4.2043e-06	1.69182e-05
ENSG00000105556	MIER2	91.9628	0.843619	0.183549	4.59615	4.30361e-06	1.73016e-05
ENSG00000139620	KANSL2	121.388	1.05481	0.22952	4.59574	4.31225e-06	1.73309e-05
ENSG00000218891	ZNF579	66.8874	1.09711	0.238893	4.59246	4.38041e-06	1.75974e-05
ENSG00000138303	ASCC1	110.299	0.879818	0.19158	4.59242	4.38128e-06	1.75974e-05
ENSG00000088247	KHSRP	4414.31	0.640827	0.139549	4.59212	4.38757e-06	1.76172e-05
ENSG00000122557	HERPUD2	122.777	0.864262	0.188325	4.58922	4.44915e-06	1.78589e-05
ENSG00000081181	ARG2	59.3805	1.18057	0.257347	4.58746	4.48677e-06	1.79987e-05
ENSG00000131323	TRAF3	122.96	0.721156	0.157251	4.58602	4.51775e-06	1.81174e-05
ENSG00000100296	THOC5	212.477	0.633006	0.138143	4.58227	4.59964e-06	1.84286e-05
ENSG00000137161	CNPY3	319.58	0.682451	0.149016	4.57971	4.65629e-06	1.8644e-05
ENSG00000212907	MT-ND4L	11446.3	0.497218	0.108658	4.576	4.73958e-06	1.89716e-05
ENSG00000198909	MAP3K3	172.647	0.753525	0.16468	4.5757	4.74629e-06	1.89925e-05
ENSG00000104356	POP1	195.487	0.747	0.163307	4.57422	4.78007e-06	1.91099e-05
ENSG00000063177	RPL18	4853.79	0.425314	0.0929878	4.57387	4.78793e-06	1.91275e-05
ENSG00000002919	SNX11	100.91	0.751919	0.164551	4.56953	4.8883e-06	1.95124e-05
ENSG00000260054	RP11-611L7.1	263.449	0.695169	0.152227	4.56666	4.9556e-06	1.97688e-05
ENSG00000128881	TTBK2	82.4757	1.10504	0.242413	4.55851	5.1519e-06	2.05265e-05
ENSG00000169087	HSPBAP1	29.5955	1.45749	0.319893	4.55619	5.20909e-06	2.07351e-05
ENSG00000154127	UBASH3B	125.827	0.724294	0.159017	4.55483	5.24273e-06	2.08561e-05
ENSG00000163719	MTMR14	94.9317	0.875472	0.192278	4.55315	5.2849e-06	2.10045e-05
ENSG00000068305	MEF2A	119.087	0.71467	0.156981	4.55259	5.29895e-06	2.10538e-05
ENSG00000109180	OCIAD1	956.909	0.44217	0.0972083	4.54869	5.3982e-06	2.14284e-05
ENSG00000147403	RPL10	841.066	0.64384	0.14155	4.54851	5.40275e-06	2.14398e-05
ENSG00000127561	SYNGR3	8.10591	4.45861	0.980417	4.54767	5.42431e-06	2.15121e-05
ENSG00000233927	RPS28	1271.93	0.370692	0.0815222	4.54712	5.43844e-06	2.15616e-05
ENSG00000224597	PTCHD3P1	129.473	0.713085	0.156832	4.5468	5.4467e-06	2.15877e-05
ENSG00000168928	CTRB2	3.52464	5.92043	1.30318	4.54307	5.54419e-06	2.19471e-05
ENSG00000102710	SUPT20H	167.676	0.700805	0.154524	4.53526	5.75316e-06	2.27394e-05
ENSG00000109133	TMEM33	434.848	0.497157	0.109704	4.53179	5.84866e-06	2.30957e-05
ENSG00000125835	SNRPB	2687.17	0.348192	0.0768449	4.5311	5.86781e-06	2.31642e-05
ENSG00000144589	STK11IP	80.8433	0.823741	0.182069	4.52434	6.05835e-06	2.38871e-05
ENSG00000160908	ZNF394	57.0599	1.00299	0.221859	4.52083	6.15985e-06	2.42725e-05
ENSG00000125818	PSMF1	1188.57	0.38556	0.0853022	4.51993	6.18592e-06	2.43678e-05
ENSG00000139734	DIAPH3	280.187	0.610424	0.135126	4.51744	6.25919e-06	2.46264e-05
ENSG00000164916	FOXK1	379.052	0.609367	0.135019	4.5132	6.38581e-06	2.50863e-05
ENSG00000015153	YAF2	115.297	0.772479	0.17117	4.51294	6.39344e-06	2.51086e-05
ENSG00000237298	TTN-AS1	23.8511	1.61194	0.357245	4.51214	6.41765e-06	2.51807e-05
ENSG00000106799	TGFBR1	98.5809	0.890017	0.197392	4.50888	6.51708e-06	2.5532e-05
ENSG00000185122	HSF1	222.587	0.648875	0.143989	4.50641	6.59348e-06	2.58234e-05
ENSG00000163126	ANKRD23	4.35268	5.51908	1.22477	4.50624	6.5988e-06	2.58364e-05
ENSG00000215717	TMEM167B	108.676	0.881759	0.19572	4.5052	6.6312e-06	2.59486e-05
ENSG00000170525	PFKFB3	35.9765	1.65551	0.367467	4.50519	6.63147e-06	2.59486e-05
ENSG00000185522	C11orf35	13.9169	2.20531	0.489968	4.50093	6.76577e-06	2.6442e-05
ENSG00000136490	LIMD2	18.6323	1.96326	0.4363	4.49981	6.80152e-06	2.65737e-05
ENSG00000120509	PDZD11	202.606	0.72884	0.16198	4.49956	6.80951e-06	2.65969e-05
ENSG00000169429	IL8	15.5676	2.74625	0.610786	4.49626	6.91607e-06	2.69723e-05
ENSG00000196268	ZNF493	55.7281	1.19611	0.266419	4.48959	7.13601e-06	2.78048e-05
ENSG00000060069	CTDP1	85.5168	0.834799	0.185994	4.4883	7.17921e-06	2.79647e-05
ENSG00000169504	CLIC4	425.245	0.675697	0.150556	4.488	7.18958e-06	2.79882e-05
ENSG00000179632	MAF1	428.75	0.584591	0.130319	4.48584	7.26256e-06	2.82552e-05
ENSG00000231721	LINC-PINT	15.8366	2.13648	0.476322	4.48537	7.27861e-06	2.83091e-05
ENSG00000122741	DCAF10	184.189	0.538834	0.120156	4.48443	7.31082e-06	2.84258e-05
ENSG00000177058	SLC38A9	75.5907	0.971356	0.216638	4.48377	7.33372e-06	2.85063e-05
ENSG00000143367	TUFT1	129.401	0.888984	0.198438	4.47991	7.46762e-06	2.90092e-05
ENSG00000099331	MYO9B	141.031	0.719145	0.160606	4.4777	7.54512e-06	2.92751e-05
ENSG00000172795	DCP2	231.231	0.636471	0.142198	4.47593	7.60785e-06	2.9476e-05
ENSG00000114982	KANSL3	472.971	0.528414	0.118057	4.47592	7.60833e-06	2.9476e-05
ENSG00000110395	CBL	259.945	0.664954	0.148581	4.47536	7.62843e-06	2.9545e-05
ENSG00000147224	PRPS1	186.393	0.640488	0.143132	4.47482	7.64772e-06	2.96108e-05
ENSG00000165684	SNAPC4	115.232	0.869189	0.194334	4.47266	7.72512e-06	2.99015e-05
ENSG00000140564	FURIN	491.001	0.630046	0.140882	4.47216	7.74332e-06	2.99574e-05
ENSG00000121680	PEX16	47.3376	1.06271	0.237629	4.47214	7.74421e-06	2.99574e-05
ENSG00000073921	PICALM	472.701	0.460154	0.102919	4.47104	7.7839e-06	3.01019e-05
ENSG00000204104	TRAF3IP1	300.741	0.583353	0.130589	4.46711	7.92836e-06	3.0633e-05
ENSG00000141699	FAM134C	153.481	0.665585	0.149023	4.46632	7.95782e-06	3.07285e-05
ENSG00000196305	IARS	395.894	1.17411	0.26298	4.46464	8.02026e-06	3.09603e-05
ENSG00000089060	SLC8B1	74.8609	0.972269	0.217823	4.46358	8.06008e-06	3.11047e-05
ENSG00000131507	NDFIP1	302.512	0.404507	0.090629	4.46333	8.06973e-06	3.11326e-05
ENSG00000198399	ITSN2	941.027	0.388111	0.0869589	4.46316	8.07594e-06	3.11473e-05
ENSG00000125618	PAX8	16.3602	2.01787	0.452392	4.46044	8.17923e-06	3.15362e-05
ENSG00000104856	RELB	92.8972	1.09888	0.246411	4.45956	8.21264e-06	3.16367e-05
ENSG00000140450	ARRDC4	22.0471	1.70624	0.382708	4.45833	8.25992e-06	3.18093e-05
ENSG00000161513	FDXR	654.333	0.524773	0.117715	4.45798	8.2734e-06	3.18422e-05
ENSG00000088179	PTPN4	100.257	0.843692	0.189377	4.45509	8.38584e-06	3.22461e-05
ENSG00000075975	MKRN2	122.342	0.905362	0.203322	4.45286	8.47355e-06	3.25737e-05
ENSG00000105173	CCNE1	182.474	0.638511	0.143425	4.45186	8.51279e-06	3.27148e-05
ENSG00000139722	VPS37B	101.072	0.80539	0.180936	4.45123	8.53784e-06	3.28013e-05
ENSG00000122882	ECD	247.609	0.572965	0.128743	4.45046	8.56854e-06	3.28996e-05
ENSG00000175213	ZNF408	66.4682	1.02149	0.229566	4.44965	8.6009e-06	3.3014e-05
ENSG00000188342	GTF2F2	348.362	0.47903	0.107721	4.44695	8.70985e-06	3.34024e-05
ENSG00000137494	ANKRD42	28.8554	1.36847	0.307788	4.44613	8.74313e-06	3.35201e-05
ENSG00000130348	QRSL1	151.77	0.662461	0.149008	4.44582	8.75568e-06	3.35582e-05
ENSG00000075089	ACTR6	78.0147	0.815961	0.183596	4.44433	8.81643e-06	3.3771e-05
ENSG00000092978	GPATCH2	174.669	0.662025	0.148975	4.44386	8.83573e-06	3.38349e-05
ENSG00000048405	ZNF800	100.047	0.794827	0.179072	4.4386	9.05464e-06	3.46347e-05
ENSG00000114999	TTL	822.064	0.507339	0.114302	4.43858	9.05533e-06	3.46347e-05
ENSG00000105669	COPE	279.651	0.702775	0.158372	4.4375	9.10102e-06	3.47888e-05
ENSG00000176973	FAM89B	60.117	0.922174	0.207867	4.43637	9.14868e-06	3.49399e-05
ENSG00000165434	PGM2L1	48.2167	1.03264	0.232841	4.43494	9.20971e-06	3.51626e-05
ENSG00000107175	CREB3	185.324	0.574148	0.129591	4.43047	9.40288e-06	3.58789e-05
ENSG00000135999	EPC2	178.567	0.575317	0.129992	4.42577	9.60986e-06	3.66037e-05
ENSG00000144395	CCDC150	95.5965	0.829733	0.187764	4.41901	9.91526e-06	3.77224e-05
ENSG00000041988	THAP3	98.8198	0.893015	0.202191	4.41669	1.00223e-05	3.81186e-05
ENSG00000132849	INADL	125.231	0.704331	0.159507	4.41569	1.00689e-05	3.82842e-05
ENSG00000153214	TMEM87B	236.925	0.48031	0.108807	4.41433	1.01324e-05	3.84918e-05
ENSG00000165733	BMS1	1032.95	0.38011	0.0861188	4.41379	1.01578e-05	3.8577e-05
ENSG00000160087	UBE2J2	407.6	0.452034	0.102472	4.41129	1.02756e-05	3.89897e-05
ENSG00000176046	NUPR1	129.577	0.951523	0.215786	4.40956	1.03581e-05	3.92683e-05
ENSG00000110958	PTGES3	2091.07	0.344888	0.0782158	4.40944	1.0364e-05	3.92792e-05
ENSG00000140044	JDP2	16.5594	3.58057	0.812207	4.40844	1.04116e-05	3.94479e-05
ENSG00000182827	ACBD3	485.208	0.483951	0.109796	4.40774	1.04455e-05	3.95648e-05
ENSG00000163932	PRKCD	55.7282	1.11854	0.253916	4.40515	1.0571e-05	4.00164e-05
ENSG00000165660	FAM175B	112.752	0.73885	0.167741	4.40471	1.05927e-05	4.00869e-05
ENSG00000183963	SMTN	133.726	0.760932	0.172867	4.40184	1.07335e-05	4.05721e-05
ENSG00000129351	ILF3	1676.31	0.406461	0.0923432	4.40163	1.0744e-05	4.06001e-05
ENSG00000179151	EDC3	104.267	0.68985	0.156805	4.3994	1.08552e-05	4.09961e-05
ENSG00000100889	PCK2	364.377	0.571018	0.129822	4.39848	1.09012e-05	4.11579e-05
ENSG00000089154	GCN1L1	521.577	0.485789	0.110487	4.3968	1.09859e-05	4.14534e-05
ENSG00000131381	ZFYVE20	139.373	0.744265	0.169291	4.39635	1.10084e-05	4.15261e-05
ENSG00000106344	RBM28	366.775	0.426951	0.0971298	4.39568	1.10426e-05	4.16431e-05
ENSG00000184402	SS18L1	124.185	0.822392	0.187157	4.39413	1.11218e-05	4.18926e-05
ENSG00000165782	TMEM55B	171.99	0.553066	0.125909	4.3926	1.12003e-05	4.21636e-05
ENSG00000124767	GLO1	457.074	0.456816	0.104068	4.38958	1.13567e-05	4.26779e-05
ENSG00000069345	DNAJA2	306.313	0.549784	0.125349	4.38602	1.15444e-05	4.33705e-05
ENSG00000141013	GAS8	86.2564	0.811053	0.184947	4.38534	1.15807e-05	4.34687e-05
ENSG00000010404	IDS	60.7186	1.08718	0.248073	4.38248	1.17334e-05	4.40293e-05
ENSG00000116809	ZBTB17	90.7028	0.96614	0.220519	4.3812	1.18028e-05	4.42638e-05
ENSG00000077238	IL4R	191.678	0.560521	0.127948	4.38085	1.18216e-05	4.43217e-05
ENSG00000184677	ZBTB40	206.222	0.693454	0.158317	4.38015	1.18599e-05	4.4452e-05
ENSG00000101019	UQCC1	239.507	0.504421	0.115183	4.37931	1.19054e-05	4.46098e-05
ENSG00000167508	MVD	139.039	0.668906	0.152781	4.37819	1.1967e-05	4.48277e-05
ENSG00000084112	SSH1	113.531	0.737223	0.168564	4.37355	1.2224e-05	4.57505e-05
ENSG00000273142	RP11-458F8.4	30.0649	1.56249	0.357318	4.37282	1.2265e-05	4.58907e-05
ENSG00000105223	PLD3	64.6797	0.843082	0.193046	4.36726	1.25816e-05	4.70614e-05
ENSG00000162885	B3GALNT2	51.6174	1.16297	0.266745	4.35986	1.30146e-05	4.86105e-05
ENSG00000120318	ARAP3	2.78293	5.81153	1.33414	4.35602	1.32449e-05	4.94281e-05
ENSG00000117262	GPR89A	96.539	0.858201	0.197117	4.35376	1.33825e-05	4.99126e-05
ENSG00000132952	USPL1	38.7728	1.18021	0.271326	4.3498	1.36263e-05	5.07632e-05
ENSG00000105325	FZR1	145.047	0.629532	0.144776	4.34833	1.37181e-05	5.10756e-05
ENSG00000196981	WDR5B	25.5932	1.47295	0.338911	4.34613	1.3856e-05	5.15445e-05
ENSG00000164849	GPR146	24.1901	1.80745	0.41615	4.34327	1.40376e-05	5.22051e-05
ENSG00000141424	SLC39A6	554.383	0.417418	0.096115	4.3429	1.40611e-05	5.22775e-05
ENSG00000144445	KANSL1L	28.7769	1.44852	0.333761	4.33999	1.42488e-05	5.29599e-05
ENSG00000179119	SPTY2D1	152.299	0.579777	0.133622	4.33894	1.43171e-05	5.31983e-05
ENSG00000167987	VPS37C	199.843	0.535263	0.123467	4.33528	1.45577e-05	5.40456e-05
ENSG00000084092	NOA1	151.129	0.671677	0.154941	4.33506	1.45722e-05	5.40841e-05
ENSG00000101343	CRNKL1	454.689	0.471584	0.108846	4.33258	1.47371e-05	5.46645e-05
ENSG00000033050	ABCF2	173.323	0.629786	0.145395	4.33154	1.48072e-05	5.48931e-05
ENSG00000163191	S100A11	74.1411	0.950693	0.219521	4.33075	1.48601e-05	5.50734e-05
ENSG00000092929	UNC13D	359.464	0.713578	0.164798	4.33002	1.49096e-05	5.5225e-05
ENSG00000153339	TRAPPC8	125.813	0.942057	0.217789	4.32554	1.52159e-05	5.62787e-05
ENSG00000007545	CRAMP1L	58.9431	0.946772	0.218925	4.32464	1.52781e-05	5.64926e-05
ENSG00000127870	RNF6	135.97	0.795699	0.183995	4.32456	1.52837e-05	5.64972e-05
ENSG00000100764	PSMC1	777.168	0.933838	0.215989	4.32354	1.53546e-05	5.67428e-05
ENSG00000093009	CDC45	126.897	0.677581	0.156986	4.3162	1.58737e-05	5.85774e-05
ENSG00000166889	PATL1	426.303	1.1825	0.274018	4.31541	1.59306e-05	5.87648e-05
ENSG00000143178	TBX19	8.76123	2.40226	0.556676	4.31537	1.59336e-05	5.87648e-05
ENSG00000136870	ZNF189	104.572	0.830423	0.19248	4.31434	1.6008e-05	5.90154e-05
ENSG00000023318	ERP44	484.441	0.630385	0.146115	4.3143	1.60107e-05	5.90154e-05
ENSG00000204569	PPP1R10	922.427	0.572644	0.132843	4.31067	1.62758e-05	5.989e-05
ENSG00000175970	UNC119B	173.126	0.690928	0.160367	4.3084	1.64438e-05	6.04564e-05
ENSG00000106443	PHF14	1202.68	0.299291	0.0694752	4.30788	1.64828e-05	6.05826e-05
ENSG00000105976	MET	539.288	0.428677	0.0995424	4.30647	1.65879e-05	6.09341e-05
ENSG00000230590	FTX	25.6871	1.71037	0.397336	4.30459	1.67292e-05	6.14182e-05
ENSG00000172766	NAA16	197.305	0.607448	0.141161	4.30322	1.6833e-05	6.1764e-05
ENSG00000115295	CLIP4	8.52433	5.03792	1.17126	4.30129	1.69809e-05	6.22286e-05
ENSG00000107164	FUBP3	279.588	0.523411	0.12176	4.2987	1.71802e-05	6.28948e-05
ENSG00000186566	GPATCH8	847.913	0.517251	0.120332	4.29852	1.71946e-05	6.29296e-05
ENSG00000167232	ZNF91	83.5828	0.835148	0.194353	4.29707	1.73067e-05	6.32862e-05
ENSG00000141564	RPTOR	110.005	0.69065	0.160787	4.29544	1.74346e-05	6.36456e-05
ENSG00000150403	TMCO3	93.5752	0.797852	0.185775	4.29473	1.74906e-05	6.38321e-05
ENSG00000004961	HCCS	288.229	0.497538	0.115888	4.29328	1.76054e-05	6.4233e-05
ENSG00000151893	CACUL1	699.02	0.392149	0.0914711	4.28713	1.80995e-05	6.59424e-05
ENSG00000204463	BAG6	395.615	0.396362	0.092498	4.28509	1.82665e-05	6.6513e-05
ENSG00000168994	PXDC1	44.7533	1.40049	0.326892	4.28425	1.83354e-05	6.67076e-05
ENSG00000176624	MEX3C	139.803	0.704822	0.164543	4.28351	1.83968e-05	6.69122e-05
ENSG00000112406	HECA	5.58509	5.02755	1.17406	4.28217	1.85077e-05	6.72776e-05
ENSG00000139624	CERS5	82.0195	0.811403	0.189611	4.27931	1.87477e-05	6.81116e-05
ENSG00000198876	DCAF12	230.088	0.630208	0.14734	4.27722	1.89242e-05	6.87139e-05
ENSG00000206432	TMEM200C	3.01954	5.65043	1.32126	4.27654	1.89824e-05	6.89062e-05
ENSG00000138092	CENPO	162.017	0.514593	0.120359	4.27548	1.90726e-05	6.91363e-05
ENSG00000028839	TBPL1	83.2758	0.888357	0.207875	4.27352	1.9241e-05	6.97073e-05
ENSG00000132359	RAP1GAP2	95.164	0.782738	0.183196	4.27269	1.93128e-05	6.99086e-05
ENSG00000130818	ZNF426	35.0806	1.25985	0.294884	4.27235	1.93425e-05	6.99966e-05
ENSG00000085224	ATRX	1331.57	0.421095	0.0985787	4.27166	1.94023e-05	7.01793e-05
ENSG00000153885	KCTD15	42.2438	0.993865	0.232666	4.27164	1.94039e-05	7.01793e-05
ENSG00000168268	NT5DC2	493.553	0.604012	0.141441	4.27041	1.95111e-05	7.05473e-05
ENSG00000170889	RPS9	1730.86	0.408315	0.0956922	4.26696	1.9815e-05	7.16061e-05
ENSG00000106244	PDAP1	514.283	0.443418	0.103988	4.26412	2.00688e-05	7.24014e-05
ENSG00000139832	RAB20	122.552	0.801226	0.187955	4.26285	2.01833e-05	7.27739e-05
ENSG00000214655	ZSWIM8	206.071	0.783199	0.183873	4.25945	2.04931e-05	7.37877e-05
ENSG00000106263	EIF3B	1262.78	0.396028	0.0930583	4.2557	2.08395e-05	7.50141e-05
ENSG00000120539	MASTL	52.0405	0.94468	0.222105	4.25329	2.10648e-05	7.5804e-05
ENSG00000163162	RNF149	461.083	0.444131	0.104435	4.25269	2.11219e-05	7.59882e-05
ENSG00000163110	PDLIM5	614.707	0.526209	0.123789	4.25084	2.12967e-05	7.6553e-05
ENSG00000214860	EVPLL	11.3733	2.49324	0.586905	4.24812	2.15573e-05	7.74251e-05
ENSG00000214193	SH3D21	46.3987	1.26082	0.296907	4.24651	2.17122e-05	7.7938e-05
ENSG00000167995	BEST1	3.2011	5.64984	1.33139	4.24357	2.19994e-05	7.88812e-05
ENSG00000120705	ETF1	720.698	0.370707	0.0873647	4.24321	2.20343e-05	7.89843e-05
ENSG00000176102	CSTF3	261.869	0.488427	0.115117	4.24289	2.20664e-05	7.90775e-05
ENSG00000172432	GTPBP2	155.816	2.18226	0.514567	4.24097	2.22553e-05	7.97321e-05
ENSG00000111276	CDKN1B	267.854	0.499971	0.117914	4.24015	2.23373e-05	8.00037e-05
ENSG00000153827	TRIP12	1050.45	0.390712	0.0922189	4.23679	2.26742e-05	8.11652e-05
ENSG00000135069	PSAT1	1376.1	0.593683	0.140169	4.23548	2.28059e-05	8.15915e-05
ENSG00000055609	KMT2C	469.485	0.537668	0.127055	4.23178	2.31848e-05	8.29012e-05
ENSG00000174945	AMZ1	2.6092	5.91224	1.39778	4.22975	2.33955e-05	8.35851e-05
ENSG00000108799	EZH1	88.2411	0.853221	0.201814	4.22775	2.36037e-05	8.42589e-05
ENSG00000100902	PSMA6	53.3082	1.79706	0.425071	4.22766	2.36133e-05	8.42699e-05
ENSG00000167110	GOLGA2	916.583	0.627112	0.148415	4.2254	2.38521e-05	8.49954e-05
ENSG00000038002	AGA	150.315	0.57754	0.136826	4.22099	2.4323e-05	8.64914e-05
ENSG00000170448	NFXL1	156.15	0.651914	0.154538	4.21846	2.45982e-05	8.74217e-05
ENSG00000153933	DGKE	68.0646	0.93822	0.222445	4.21777	2.4673e-05	8.76393e-05
ENSG00000197969	VPS13A	404.112	0.434524	0.103148	4.21261	2.52439e-05	8.95686e-05
ENSG00000162409	PRKAA2	468.545	0.447753	0.106339	4.21062	2.54676e-05	9.03125e-05
ENSG00000197912	SPG7	325.571	0.564574	0.134218	4.20641	2.59459e-05	9.19584e-05
ENSG00000108395	TRIM37	240.96	0.467603	0.111174	4.20603	2.59894e-05	9.2087e-05
ENSG00000135378	PRRG4	39.9647	1.39738	0.333267	4.19297	2.75322e-05	9.72866e-05
ENSG00000163714	U2SURP	1926.34	0.345605	0.0824333	4.19254	2.75852e-05	9.74203e-05
ENSG00000163428	LRRC58	794.341	0.378929	0.0904483	4.18946	2.7962e-05	9.86433e-05
ENSG00000125812	GZF1	102.98	0.775105	0.185096	4.18759	2.81928e-05	9.9323e-05
ENSG00000135968	GCC2	898.941	0.55978	0.133676	4.18759	2.81932e-05	9.9323e-05
ENSG00000092871	RFFL	282.238	0.532625	0.127204	4.18716	2.82462e-05	9.94823e-05
ENSG00000063046	EIF4B	519.797	0.719119	0.171796	4.1859	2.84039e-05	0.00010001
ENSG00000169217	CD2BP2	263.067	0.55984	0.133751	4.18569	2.84299e-05	0.000100075
ENSG00000078699	CBFA2T2	148.315	0.657356	0.157112	4.18399	2.86439e-05	0.000100801
ENSG00000153975	ZUFSP	69.2479	0.84755	0.202687	4.18156	2.89511e-05	0.000101771
ENSG00000134058	CDK7	178.658	0.971741	0.232442	4.18057	2.90782e-05	0.000102162
ENSG00000116580	GON4L	250.151	0.655057	0.156718	4.17984	2.91711e-05	0.00010246
ENSG00000105695	MAG	3.36056	5.93732	1.42058	4.17951	2.92143e-05	0.000102584
ENSG00000197892	KIF13B	153.542	0.52258	0.125036	4.17944	2.92222e-05	0.000102584
ENSG00000164327	RICTOR	82.0607	0.887589	0.212497	4.17695	2.9545e-05	0.00010366
ENSG00000211455	STK38L	71.8454	1.01039	0.241968	4.17571	2.97062e-05	0.000104147
ENSG00000168300	PCMTD1	53.2815	1.08226	0.259279	4.17413	2.99126e-05	0.000104751
ENSG00000168259	DNAJC7	909.091	0.460375	0.110388	4.17053	3.0389e-05	0.000106333
ENSG00000114480	GBE1	109.399	0.79764	0.191315	4.16925	3.05602e-05	0.000106874
ENSG00000138100	TRIM54	5.93986	4.79493	1.15014	4.16898	3.0597e-05	0.000106973
ENSG00000168917	SLC35G2	5.20222	3.82904	0.918513	4.16873	3.063e-05	0.000107031
ENSG00000128159	TUBGCP6	82.2323	0.955353	0.22923	4.16765	3.07754e-05	0.00010751
ENSG00000181852	RNF41	83.8967	0.780263	0.187365	4.1644	3.12173e-05	0.000108965
ENSG00000104529	EEF1D	2223.83	0.517	0.124174	4.16351	3.13392e-05	0.000109361
ENSG00000023041	ZDHHC6	156.502	0.617472	0.148312	4.16334	3.1362e-05	0.000109411
ENSG00000125962	ARMCX5	78.4766	0.757099	0.181918	4.16175	3.15818e-05	0.000110148
ENSG00000140987	ZSCAN32	71.0176	0.986175	0.237029	4.16058	3.17447e-05	0.000110686
ENSG00000105732	ZNF574	46.027	1.07103	0.257516	4.15908	3.19527e-05	0.000111381
ENSG00000054938	CHRDL2	5.04069	4.23114	1.01805	4.15613	3.23678e-05	0.000112706
ENSG00000111011	RSRC2	772.577	0.559688	0.134749	4.15354	3.27367e-05	0.000113929
ENSG00000142661	MYOM3	76.4334	0.835464	0.201229	4.1518	3.29864e-05	0.000114707
ENSG00000133997	MED6	165.675	0.526575	0.126864	4.1507	3.31455e-05	0.000115228
ENSG00000108591	DRG2	118.521	0.624147	0.150384	4.15036	3.31953e-05	0.000115356
ENSG00000075856	SART3	471.22	0.40792	0.0982864	4.15032	3.32004e-05	0.000115356
ENSG00000151532	VTI1A	144.274	0.777093	0.18748	4.14493	3.3991e-05	0.000117976
ENSG00000153291	SLC25A27	23.0998	1.66817	0.402642	4.14307	3.42688e-05	0.000118812
ENSG00000106524	ANKMY2	150.265	0.613487	0.148101	4.14235	3.43759e-05	0.000119136
ENSG00000136738	STAM	230.214	0.553848	0.133705	4.14231	3.43826e-05	0.000119136
ENSG00000082269	FAM135A	107.696	0.739175	0.17845	4.1422	3.43985e-05	0.000119136
ENSG00000076242	MLH1	198.097	0.562898	0.135893	4.1422	3.4399e-05	0.000119136
ENSG00000084073	ZMPSTE24	318.531	0.495372	0.119606	4.1417	3.44736e-05	0.000119362
ENSG00000175105	ZNF654	47.5232	1.09777	0.265072	4.14141	3.45184e-05	0.000119485
ENSG00000125505	MBOAT7	429.416	0.501763	0.12117	4.14098	3.45824e-05	0.000119643
ENSG00000166266	CUL5	418.496	0.41637	0.100557	4.14063	3.46351e-05	0.000119793
ENSG00000029725	RABEP1	376.774	0.435687	0.105299	4.13763	3.50908e-05	0.000121271
ENSG00000178814	OPLAH	53.4431	0.981089	0.237157	4.13687	3.52073e-05	0.000121609
ENSG00000204592	HLA-E	286.366	0.496023	0.119916	4.13642	3.52772e-05	0.000121818
ENSG00000171824	EXOSC10	343.159	0.559234	0.135226	4.13554	3.54118e-05	0.000122217
ENSG00000138942	RNF185	57.7333	0.983384	0.237819	4.135	3.54949e-05	0.000122471
ENSG00000173261	PLAC8L1	3.98255	3.94935	0.955353	4.13391	3.56637e-05	0.000122988
ENSG00000112186	CAP2	225.944	0.537179	0.129948	4.13381	3.56805e-05	0.000123013
ENSG00000221963	APOL6	184.901	0.588677	0.142433	4.133	3.58054e-05	0.000123411
ENSG00000105287	PRKD2	62.2017	0.808821	0.195737	4.13219	3.59326e-05	0.00012375
ENSG00000168228	ZCCHC4	52.082	1.05663	0.255738	4.13171	3.60078e-05	0.000123975
ENSG00000248333	CDK11B	67.4374	0.868056	0.210134	4.13096	3.61254e-05	0.000124347
ENSG00000164164	OTUD4	215.736	0.552004	0.133671	4.12957	3.63439e-05	0.000125033
ENSG00000136052	SLC41A2	84.4884	0.914028	0.22142	4.12803	3.65882e-05	0.00012584
ENSG00000167861	HID1	92.5325	1.01048	0.244941	4.12537	3.70134e-05	0.000127268
ENSG00000160953	MUM1	480.756	0.504476	0.122304	4.12477	3.71099e-05	0.000127566
ENSG00000160447	PKN3	150.5	0.640018	0.155183	4.12428	3.71891e-05	0.00012777
ENSG00000129749	CHRNA10	6.53857	2.87568	0.697332	4.12382	3.72635e-05	0.000127991
ENSG00000198060	MARCH5	255.651	0.54303	0.131688	4.1236	3.73e-05	0.000128083
ENSG00000271936	RP11-443B20.1	16.3264	1.29822	0.314942	4.12209	3.75452e-05	0.00012889
ENSG00000024862	CCDC28A	118.964	0.573333	0.139097	4.12182	3.75887e-05	0.000129005
ENSG00000172534	HCFC1	1160.05	0.486418	0.118111	4.11832	3.81642e-05	0.000130911
ENSG00000085978	ATG16L1	178.066	0.559025	0.135765	4.11758	3.82867e-05	0.000131296
ENSG00000164180	TMEM161B	146.023	0.73659	0.179281	4.10857	3.98116e-05	0.000136417
ENSG00000131725	WDR44	38.6612	1.10145	0.268135	4.1078	3.99454e-05	0.000136839
ENSG00000163156	SCNM1	139.702	0.688289	0.167571	4.10745	4.00051e-05	0.000137007
ENSG00000144597	EAF1	149.916	0.892344	0.217255	4.10737	4.00198e-05	0.000137021
ENSG00000102606	ARHGEF7	143.31	0.681796	0.166095	4.10485	4.04571e-05	0.000138408
ENSG00000115414	FN1	11046.4	0.35838	0.0873439	4.10309	4.07673e-05	0.000139396
ENSG00000153786	ZDHHC7	536.544	0.462267	0.112679	4.10252	4.08681e-05	0.000139684
ENSG00000257732	RP11-818F20.5	3.24592	5.50994	1.34429	4.09877	4.15346e-05	0.000141756
ENSG00000015520	NPC1L1	212.384	0.601548	0.146911	4.09465	4.22808e-05	0.00014415
ENSG00000149100	EIF3M	943.818	0.539766	0.13192	4.09163	4.28346e-05	0.000145961
ENSG00000104231	ZFAND1	65.5277	0.934538	0.228522	4.08949	4.32324e-05	0.000147278
ENSG00000198315	ZKSCAN8	64.65	1.06057	0.25943	4.08807	4.34982e-05	0.000148105
ENSG00000239305	RNF103	360.605	0.523997	0.128195	4.08749	4.36065e-05	0.000148435
ENSG00000009335	UBE3C	381.704	0.4013	0.0982761	4.08339	4.43835e-05	0.000151
ENSG00000124275	MTRR	92.2103	0.670919	0.164334	4.08264	4.45261e-05	0.000151405
ENSG00000158850	B4GALT3	247.884	0.471189	0.115441	4.08165	4.47178e-05	0.000151937
ENSG00000080608	KIAA0020	903.973	0.390428	0.0957627	4.07704	4.56132e-05	0.000154816
ENSG00000083937	CHMP2B	378.116	0.448138	0.109953	4.07573	4.58707e-05	0.000155644
ENSG00000167182	SP2	79.7343	0.786565	0.19299	4.07567	4.58813e-05	0.000155644
ENSG00000197608	ZNF841	28.4417	1.39985	0.34353	4.07489	4.60357e-05	0.000156127
ENSG00000152520	PAN3	69.917	0.89159	0.219053	4.0702	4.69724e-05	0.00015904
ENSG00000179750	APOBEC3B	25.3412	1.46112	0.359009	4.06988	4.70377e-05	0.00015919
ENSG00000164031	DNAJB14	223.663	0.583833	0.143506	4.06836	4.73459e-05	0.000160191
ENSG00000104825	NFKBIB	180.641	0.659347	0.162085	4.06792	4.74356e-05	0.000160453
ENSG00000025708	TYMP	45.498	1.32856	0.32662	4.06761	4.74977e-05	0.000160578
ENSG00000175898	CTD-2369P2.2	10.5792	2.13912	0.525952	4.06714	4.75943e-05	0.000160821
ENSG00000183258	DDX41	168.233	0.685058	0.168516	4.06524	4.79824e-05	0.000162047
ENSG00000158079	PTPDC1	65.6212	1.03158	0.253913	4.06271	4.85053e-05	0.000163727
ENSG00000196497	IPO4	543.728	0.654696	0.161159	4.06242	4.85663e-05	0.000163891
ENSG00000162222	TTC9C	94.1382	0.861384	0.212168	4.05992	4.90893e-05	0.000165482
ENSG00000133731	IMPA1	139.159	0.772401	0.190267	4.05956	4.91649e-05	0.000165634
ENSG00000101004	NINL	221.183	0.697221	0.171749	4.05952	4.91727e-05	0.000165634
ENSG00000116883	RP11-268J15.5	21.6537	1.59304	0.392476	4.05895	4.92949e-05	0.000166002
ENSG00000141376	BCAS3	82.3106	0.888708	0.218975	4.05849	4.93912e-05	0.000166283
ENSG00000181873	IBA57	55.8276	0.957442	0.235937	4.05803	4.94882e-05	0.000166566
ENSG00000101493	ZNF516	67.385	0.873893	0.215428	4.05654	4.98054e-05	0.00016759
ENSG00000106299	WASL	278.406	0.665195	0.163987	4.05639	4.98369e-05	0.000167652
ENSG00000131263	RLIM	140.026	0.535162	0.13198	4.05487	5.01612e-05	0.000168699
ENSG00000100994	PYGB	236.464	0.513911	0.126887	4.05016	5.11833e-05	0.000172002
ENSG00000144741	SLC25A26	122.101	0.727379	0.179718	4.04734	5.1804e-05	0.000173816
ENSG00000132003	ZSWIM4	6.84522	3.64115	0.899656	4.04727	5.18185e-05	0.00017382
ENSG00000165526	RPUSD4	452.986	0.450593	0.111338	4.04707	5.18633e-05	0.000173925
ENSG00000254858	MPV17L2	93.7069	0.717437	0.177295	4.04658	5.19706e-05	0.000174239
ENSG00000147883	CDKN2B	8.51408	3.63052	0.897503	4.04513	5.22931e-05	0.000175229
ENSG00000180626	ZNF594	14.964	1.49742	0.370499	4.04163	5.30803e-05	0.000177775
ENSG00000180376	CCDC66	136.436	0.693391	0.171578	4.04127	5.31631e-05	0.000178006
ENSG00000117222	RBBP5	180.423	0.639012	0.158152	4.04049	5.33396e-05	0.000178551
ENSG00000042286	AIFM2	875.596	0.315342	0.0780549	4.04	5.34502e-05	0.000178875
ENSG00000105085	MED26	73.3954	0.805623	0.199503	4.03815	5.38733e-05	0.000180197
ENSG00000215021	PHB2	1558.02	0.394599	0.0978012	4.0347	5.4671e-05	0.000182676
ENSG00000079313	REXO1	54.6316	0.919648	0.227963	4.0342	5.47876e-05	0.00018297
ENSG00000100325	ASCC2	316.887	0.701458	0.173921	4.0332	5.50221e-05	0.000183611
ENSG00000130254	SAFB2	685.563	0.458449	0.113679	4.03283	5.51082e-05	0.000183851
ENSG00000204256	BRD2	869.433	0.474428	0.117672	4.03178	5.53556e-05	0.000184581
ENSG00000138802	SEC24B	87.3038	0.670314	0.166323	4.0302	5.5729e-05	0.000185682
ENSG00000154803	FLCN	231.099	0.615926	0.153074	4.02372	5.72861e-05	0.000190771
ENSG00000063978	RNF4	61.1582	0.844578	0.210017	4.02147	5.7837e-05	0.000192407
ENSG00000225177	RP11-390P2.4	17.9255	2.03285	0.505529	4.02124	5.78914e-05	0.00019251
ENSG00000111615	KRR1	564.275	0.365044	0.0907794	4.02122	5.78976e-05	0.00019251
ENSG00000198218	QRICH1	114.327	0.697004	0.173351	4.02077	5.80074e-05	0.000192825
ENSG00000100029	PES1	242.484	0.653068	0.162464	4.01977	5.82562e-05	0.000193602
ENSG00000110514	MADD	80.0526	0.742019	0.184645	4.01862	5.85399e-05	0.000194495
ENSG00000085832	EPS15	165.711	0.541178	0.134771	4.01553	5.93134e-05	0.000197014
ENSG00000114573	ATP6V1A	670.431	0.375851	0.093712	4.01071	6.05371e-05	0.00020094
ENSG00000143512	HHIPL2	3.57487	5.02806	1.25378	4.0103	6.06413e-05	0.000201217
ENSG00000038382	TRIO	200.851	0.598997	0.149562	4.00501	6.2014e-05	0.000205666
ENSG00000105464	GRIN2D	9.66602	2.48245	0.620214	4.00258	6.26565e-05	0.00020769
ENSG00000136877	FPGS	122.263	0.682551	0.170604	4.0008	6.313e-05	0.000209206
ENSG00000141141	DDX52	788.121	0.324518	0.081125	4.00022	6.32837e-05	0.000209608
ENSG00000090054	SPTLC1	47.4197	0.931275	0.232992	3.99702	6.41441e-05	0.000212281
ENSG00000169251	NMD3	234.15	0.486794	0.121814	3.99622	6.43622e-05	0.000212852
ENSG00000101882	NKAP	367.693	0.435951	0.109147	3.99415	6.49264e-05	0.000214663
ENSG00000108294	PSMB3	461.671	0.918109	0.229898	3.99355	6.50922e-05	0.000215155
ENSG00000134419	RPS15A	1463.84	0.359147	0.0899375	3.9933	6.51605e-05	0.000215272
ENSG00000175287	PHYHD1	193.413	0.750071	0.187936	3.9911	6.57668e-05	0.000217163
ENSG00000128731	HERC2	208.256	0.556575	0.139456	3.99104	6.57852e-05	0.000217168
ENSG00000166261	ZNF202	54.5548	0.888117	0.222626	3.98927	6.62763e-05	0.000218622
ENSG00000124217	MOCS3	80.1023	0.799776	0.200519	3.98852	6.64863e-05	0.000219259
ENSG00000127463	EMC1	284.597	0.499771	0.125313	3.98817	6.65839e-05	0.000219468
ENSG00000183793	NPIPA5	5.94521	2.71973	0.682263	3.98634	6.71008e-05	0.000221059
ENSG00000125676	THOC2	2130.38	0.31888	0.0800548	3.98327	6.79742e-05	0.000223879
ENSG00000133805	AMPD3	7.27853	4.0697	1.02194	3.98232	6.82446e-05	0.000224655
ENSG00000152102	FAM168B	463.659	0.373506	0.0938313	3.98062	6.87371e-05	0.000226193
ENSG00000234546	RP3-510D11.2	7.99789	2.1516	0.540524	3.98058	6.87469e-05	0.000226193
ENSG00000153113	CAST	775.94	0.405151	0.101876	3.97692	6.9813e-05	0.000229388
ENSG00000005801	ZNF195	197.398	0.64702	0.162695	3.97688	6.98245e-05	0.000229388
ENSG00000153879	CEBPG	292.816	0.802247	0.201764	3.97616	7.00359e-05	0.000229965
ENSG00000256683	ZNF350	53.3487	0.952214	0.239515	3.97559	7.02044e-05	0.000230401
ENSG00000170222	ADPRM	22.4331	1.30762	0.328941	3.97524	7.03079e-05	0.000230682
ENSG00000137312	FLOT1	431.244	0.47396	0.119373	3.97041	7.175e-05	0.000235175
ENSG00000104976	SNAPC2	122.243	0.645203	0.162521	3.96996	7.18841e-05	0.000235554
ENSG00000143970	ASXL2	404.87	0.425162	0.107143	3.96816	7.24303e-05	0.000237284
ENSG00000144161	ZC3H8	335.277	0.441764	0.111393	3.96581	7.31458e-05	0.000239324
ENSG00000105617	LENG1	58.5467	0.94187	0.237725	3.96202	7.43175e-05	0.000242911
[truncated: 10,902 more rows]

## Sheet: Nelf_vs_DMSO
geneID	geneName	baseMean	log2FoldChange	lfcSE	stat	pvalue	padj
ENSG00000070669	ASNS	796.61	3.98956	0.125718	31.7341	5.25418e-221	6.77842e-217
ENSG00000151012	SLC7A11	1472.07	3.10959	0.0988595	31.4546	3.63291e-217	2.34341e-213
ENSG00000106105	GARS	1549.33	1.95233	0.0685758	28.4697	2.7779e-178	1.19459e-174
ENSG00000168209	DDIT4	641.381	2.95058	0.10626	27.7676	1.06841e-169	3.44589e-166
ENSG00000065911	MTHFD2	1414.66	2.46099	0.0907982	27.104	8.83591e-162	2.27984e-158
ENSG00000163993	S100P	1067.09	2.92697	0.12508	23.4007	4.20325e-121	9.0377e-118
ENSG00000139269	INHBE	578.749	2.41495	0.109141	22.1268	1.74591e-108	3.2177e-105
ENSG00000101255	TRIB3	1224.87	2.31231	0.114013	20.2811	1.88997e-91	3.04782e-88
ENSG00000166986	MARS	1334.37	1.52121	0.0788785	19.2855	7.10864e-83	1.01898e-79
ENSG00000113739	STC2	878.384	2.01816	0.106518	18.9466	4.70944e-80	5.52332e-77
ENSG00000128165	ADM2	214.523	3.05004	0.165267	18.4552	4.73592e-76	5.09151e-73
ENSG00000173812	EIF1	5408.4	1.12933	0.0620197	18.2093	4.35671e-74	4.32353e-71
ENSG00000110619	CARS	485.045	1.96678	0.114822	17.1289	9.03867e-66	7.77386e-63
ENSG00000175197	DDIT3	342.574	2.53754	0.149609	16.9612	1.59173e-64	1.28343e-61
ENSG00000130766	SESN2	1409.14	2.4244	0.148244	16.354	4.07119e-60	3.08955e-57
ENSG00000176046	NUPR1	129.577	3.28516	0.201481	16.3051	9.08632e-60	6.51237e-57
ENSG00000139514	SLC7A1	941.27	1.44998	0.0891981	16.2558	2.03294e-59	1.38037e-56
ENSG00000147364	FBXO25	885.403	1.77312	0.112127	15.8135	2.51144e-56	1.54286e-53
ENSG00000146678	IGFBP1	773.984	4.89638	0.311618	15.7128	1.23658e-55	7.25144e-53
ENSG00000131910	NR0B2	806.773	1.4976	0.0966679	15.4922	3.91585e-54	2.19645e-51
ENSG00000134684	YARS	607.931	1.39406	0.0904544	15.4117	1.36504e-53	7.33767e-51
ENSG00000163959	SLC51A	158.23	2.51903	0.164181	15.343	3.94736e-53	2.03699e-50
ENSG00000128272	ATF4	3332.51	1.88242	0.123776	15.2083	3.11691e-52	1.54659e-49
ENSG00000196517	SLC6A9	71.0068	3.96932	0.268113	14.8047	1.36647e-49	6.52918e-47
ENSG00000090861	AARS	832.42	1.29065	0.0881646	14.6391	1.58082e-48	6.79804e-46
ENSG00000152409	JMY	357.364	1.88189	0.130287	14.4442	2.72673e-47	1.13476e-44
ENSG00000260916	CCPG1	540.911	1.62573	0.114656	14.1791	1.23338e-45	4.67994e-43
ENSG00000177169	ULK1	407.821	2.17979	0.154993	14.0638	6.34183e-45	2.3376e-42
ENSG00000116761	CTH	113.54	3.75686	0.268538	13.9901	1.79279e-44	6.25103e-42
ENSG00000130513	GDF15	15042.2	1.92949	0.139873	13.7946	2.7467e-43	9.32505e-41
ENSG00000169715	MT1E	539.902	3.45421	0.250915	13.7665	4.05607e-43	1.34173e-40
ENSG00000172216	CEBPB	465.608	2.50529	0.182563	13.7229	7.40434e-43	2.38809e-40
ENSG00000105281	SLC1A5	974.335	1.50007	0.109765	13.6662	1.616e-42	5.08487e-40
ENSG00000092621	PHGDH	477.16	1.43203	0.104811	13.663	1.68893e-42	5.18783e-40
ENSG00000111371	SLC38A1	632.631	1.33181	0.0983631	13.5397	9.11255e-42	2.67184e-39
ENSG00000100889	PCK2	364.377	1.68295	0.125183	13.4439	3.34537e-41	9.59081e-39
ENSG00000140105	WARS	324.148	1.43841	0.10921	13.171	1.28846e-39	3.53669e-37
ENSG00000168003	SLC3A2	3394.88	1.14521	0.0877886	13.045	6.78146e-39	1.82266e-36
ENSG00000166123	GPT2	910.343	1.63906	0.126126	12.9954	1.29925e-38	3.42073e-36
ENSG00000134294	SLC38A2	2789.24	1.07734	0.0829775	12.9835	1.51723e-38	3.91475e-36
ENSG00000031698	SARS	598.845	1.61987	0.125528	12.9045	4.24716e-38	1.07436e-35
ENSG00000131711	MAP1B	950.114	1.51531	0.118245	12.815	1.3517e-37	3.35351e-35
ENSG00000125148	MT2A	3893.57	2.52339	0.197653	12.7668	2.51299e-37	6.11699e-35
ENSG00000060982	BCAT1	218.628	1.7493	0.137155	12.7541	2.95632e-37	7.06286e-35
ENSG00000182199	SHMT2	773.302	1.31089	0.102826	12.7486	3.1757e-37	7.44904e-35
ENSG00000187840	EIF4EBP1	164.667	2.03387	0.159961	12.7148	4.89493e-37	1.12767e-34
ENSG00000250479	CHCHD10	1409.23	1.28596	0.10176	12.6371	1.31854e-36	2.98429e-34
ENSG00000145555	MYO10	181.194	1.70582	0.135495	12.5896	2.40931e-36	5.35906e-34
ENSG00000008710	PKD1	198.201	2.12423	0.169574	12.5269	5.32243e-36	1.16381e-33
ENSG00000198417	MT1F	103.425	3.37577	0.276276	12.2188	2.46609e-34	5.21559e-32
ENSG00000187134	AKR1C1	3046.74	1.30612	0.107414	12.1597	5.09395e-34	1.04313e-31
ENSG00000106948	AKNA	109.205	2.43469	0.202715	12.0104	3.13223e-33	6.21675e-31
ENSG00000113407	TARS	1294.27	0.986715	0.0824369	11.9693	5.14368e-33	1.00543e-30
ENSG00000125977	EIF2S2	4569.29	0.943748	0.0789028	11.9609	5.69474e-33	1.09653e-30
ENSG00000140961	OSGIN1	200.848	1.59415	0.134691	11.8357	2.55301e-32	4.77339e-30
ENSG00000162772	ATF3	222.846	2.81283	0.240333	11.7039	1.21737e-31	2.21202e-29
ENSG00000115902	SLC1A4	527.898	1.30806	0.114165	11.4576	2.15363e-30	3.80603e-28
ENSG00000261824	LINC00662	177.78	1.83014	0.160364	11.4124	3.62425e-30	6.23419e-28
ENSG00000185262	UBALD2	242.618	1.43107	0.125831	11.373	5.70241e-30	9.67983e-28
ENSG00000189060	H1F0	659.402	1.6215	0.145119	11.1736	5.49108e-29	9.20005e-27
ENSG00000162733	DDR2	76.3056	2.65428	0.237818	11.161	6.32749e-29	1.0333e-26
ENSG00000140465	CYP1A1	1099.58	1.82875	0.164191	11.138	8.19678e-29	1.32183e-26
ENSG00000006652	IFRD1	316.216	1.56239	0.141779	11.0199	3.06332e-28	4.879e-26
ENSG00000135069	PSAT1	1376.1	1.52079	0.139076	10.935	7.84413e-28	1.21924e-25
ENSG00000088826	SMOX	540.961	1.35823	0.124962	10.8691	1.61707e-27	2.48354e-25
ENSG00000161011	SQSTM1	3192.41	1.002	0.0934416	10.7233	7.91365e-27	1.16016e-24
ENSG00000125144	MT1G	296.719	3.52377	0.333287	10.5728	3.98507e-26	5.77656e-24
ENSG00000198380	GFPT1	835.977	0.85328	0.0808279	10.5568	4.72743e-26	6.77651e-24
ENSG00000087074	PPP1R15A	728.356	1.66658	0.160442	10.3874	2.82926e-25	4.01101e-23
ENSG00000117601	SERPINC1	208.28	1.26024	0.122327	10.3022	6.8872e-25	9.6578e-23
ENSG00000221963	APOL6	184.901	1.37211	0.134518	10.2002	1.979e-24	2.74528e-22
ENSG00000146733	PSPH	461.205	1.11959	0.110034	10.175	2.56488e-24	3.52016e-22
ENSG00000140941	MAP1LC3B	535.481	1.45308	0.143993	10.0913	6.03534e-24	8.19599e-22
ENSG00000115904	SOS1	793.846	1.08426	0.109743	9.87993	5.08686e-23	6.69648e-21
ENSG00000053254	FOXN3	831.913	0.797333	0.0819359	9.73118	2.22012e-22	2.86418e-20
ENSG00000119801	YPEL5	201.322	1.61179	0.165896	9.71567	2.58545e-22	3.30247e-20
ENSG00000139112	GABARAPL1	422.617	1.75586	0.180964	9.70282	2.93268e-22	3.70927e-20
ENSG00000141582	CBX4	685.989	1.17436	0.121341	9.67813	3.73486e-22	4.63302e-20
ENSG00000005700	IBTK	521.42	0.883656	0.0918148	9.62434	6.3111e-22	7.68109e-20
ENSG00000115226	FNDC4	153.975	1.33216	0.138689	9.60536	7.58899e-22	9.15005e-20
ENSG00000136868	SLC31A1	647.457	0.840275	0.0879734	9.55147	1.27872e-21	1.49971e-19
ENSG00000106070	GRB10	342.07	1.32449	0.139942	9.46462	2.94631e-21	3.39378e-19
ENSG00000136436	CALCOCO2	708.075	0.999306	0.10583	9.44257	3.63749e-21	4.15286e-19
ENSG00000164266	SPINK1	337.498	1.3822	0.146469	9.43683	3.84238e-21	4.3483e-19
ENSG00000105327	BBC3	331.858	1.60067	0.171269	9.3459	9.11149e-21	1.02215e-18
ENSG00000087266	SH3BP2	122.115	1.74562	0.186811	9.34436	9.24491e-21	1.02818e-18
ENSG00000162496	DHRS3	275.153	1.21777	0.130401	9.33867	9.75482e-21	1.07561e-18
ENSG00000122218	COPA	645.58	0.736732	0.0794553	9.27228	1.82214e-20	1.97542e-18
ENSG00000137642	SORL1	337.409	0.965382	0.104596	9.22959	2.71667e-20	2.89651e-18
ENSG00000102401	ARMCX3	331.747	1.0509	0.11468	9.16379	5.01078e-20	5.21323e-18
ENSG00000157693	C9orf91	82.7672	1.78131	0.194718	9.14814	5.79238e-20	5.9782e-18
ENSG00000161542	PRPSAP1	374.202	0.877553	0.0963057	9.11216	8.07608e-20	8.2039e-18
ENSG00000125826	RBCK1	2518.98	0.810152	0.0889748	9.10541	8.59403e-20	8.59469e-18
ENSG00000167522	ANKRD11	3335.58	0.731989	0.0804865	9.09456	9.4972e-20	9.42488e-18
ENSG00000065361	ERBB3	448.841	0.794039	0.0895396	8.86802	7.44611e-19	6.96104e-17
ENSG00000188971	RP11-427H3.3	374.648	1.00423	0.114428	8.77609	1.69259e-18	1.54866e-16
ENSG00000151632	AKR1C2	1416.74	1.16949	0.133479	8.76163	1.92452e-18	1.74847e-16
ENSG00000099875	MKNK2	824.505	0.915157	0.105419	8.68114	3.91838e-18	3.53503e-16
ENSG00000177606	JUN	827.12	0.899056	0.104071	8.6389	5.67592e-18	5.05832e-16
ENSG00000214274	ANG	164.912	1.41063	0.163292	8.63871	5.68527e-18	5.05832e-16
ENSG00000114120	SLC25A36	345.586	0.985464	0.114614	8.5981	8.10442e-18	7.11259e-16
ENSG00000130173	C19orf80	285.765	1.22021	0.143162	8.52329	1.55088e-17	1.34282e-15
ENSG00000070540	WIPI1	169.838	1.33538	0.158104	8.44618	3.00984e-17	2.57152e-15
ENSG00000197594	ENPP1	335.085	1.01987	0.12106	8.42454	3.62166e-17	3.07388e-15
ENSG00000120053	GOT1	792.46	0.819178	0.0974086	8.40971	4.11016e-17	3.4657e-15
ENSG00000198796	ALPK2	148.447	1.41669	0.169185	8.37362	5.58736e-17	4.68069e-15
ENSG00000219481	NBPF1	369.653	1.03705	0.124598	8.32322	8.56066e-17	7.03447e-15
ENSG00000049449	RCN1	386.123	0.952053	0.114438	8.31941	8.84036e-17	7.17293e-15
ENSG00000159479	MED8	280.623	0.859768	0.103972	8.26921	1.34851e-16	1.06731e-14
ENSG00000084734	GCKR	245.031	1.57579	0.190674	8.26435	1.40459e-16	1.10491e-14
ENSG00000140992	PDPK1	396.531	0.820937	0.100298	8.18502	2.72255e-16	2.11588e-14
ENSG00000080031	PTPRH	209.347	1.6919	0.206931	8.17618	2.92995e-16	2.26343e-14
ENSG00000155304	HSPA13	215.142	1.18287	0.144889	8.164	3.24114e-16	2.45964e-14
ENSG00000116584	ARHGEF2	249.506	1.57413	0.193928	8.1171	4.77474e-16	3.60228e-14
ENSG00000151135	C12orf23	302.026	0.898964	0.111119	8.09013	5.95997e-16	4.47033e-14
ENSG00000075643	MOCOS	359.823	1.1346	0.140324	8.08557	6.18744e-16	4.61411e-14
ENSG00000141504	SAT2	579.096	0.700773	0.0867493	8.07814	6.57603e-16	4.87571e-14
ENSG00000119729	RHOQ	302.128	1.09877	0.136239	8.06502	7.32219e-16	5.36725e-14
ENSG00000125735	TNFSF14	132.271	1.74885	0.218241	8.01341	1.1157e-15	7.9965e-14
ENSG00000107223	EDF1	1238.41	0.674749	0.0854842	7.89325	2.94406e-15	2.05304e-13
ENSG00000163683	SMIM14	229.687	1.21643	0.154337	7.88168	3.23017e-15	2.24046e-13
ENSG00000119777	TMEM214	299.442	0.828093	0.105462	7.85205	4.09304e-15	2.80704e-13
ENSG00000157514	TSC22D3	33.3601	6.83051	0.869967	7.85146	4.11232e-15	2.80704e-13
ENSG00000135636	DYSF	98.138	1.56422	0.199583	7.83742	4.59896e-15	3.12269e-13
ENSG00000162236	STX5	96.3492	1.25202	0.160108	7.81983	5.28953e-15	3.57279e-13
ENSG00000170412	GPRC5C	716.568	0.932341	0.119992	7.77006	7.84517e-15	5.19029e-13
ENSG00000188554	NBR1	391.791	0.772532	0.0995618	7.75933	8.53824e-15	5.59147e-13
ENSG00000160200	CBS	735.886	1.21143	0.156196	7.75585	8.77545e-15	5.71779e-13
ENSG00000074935	TUBE1	52.1147	1.79974	0.232204	7.7507	9.13868e-15	5.88249e-13
ENSG00000128283	CDC42EP1	160.624	1.16299	0.150404	7.73246	1.05484e-14	6.70371e-13
ENSG00000136628	EPRS	1200.18	0.66984	0.0870103	7.6984	1.37776e-14	8.67046e-13
ENSG00000196365	LONP1	738.162	0.810881	0.105593	7.6793	1.59958e-14	1.00175e-12
ENSG00000182704	TSKU	747.633	0.95647	0.125056	7.64832	2.0362e-14	1.26904e-12
ENSG00000120254	MTHFD1L	487.997	0.84135	0.110082	7.64295	2.12307e-14	1.31681e-12
ENSG00000224032	EPB41L4A-AS1	478.383	0.891514	0.116714	7.63848	2.19808e-14	1.35681e-12
ENSG00000116954	RRAGC	450.249	0.757577	0.100494	7.53854	4.75251e-14	2.86505e-12
ENSG00000166833	NAV2	65.394	1.46887	0.195926	7.49709	6.52504e-14	3.87924e-12
ENSG00000225177	RP11-390P2.4	17.9255	3.57859	0.477577	7.49323	6.71994e-14	3.97679e-12
ENSG00000001084	GCLC	371.749	0.928041	0.124808	7.43575	1.03975e-13	6.09721e-12
ENSG00000127948	POR	1786.71	0.596503	0.0803334	7.42535	1.12485e-13	6.56637e-12
ENSG00000178381	ZFAND2A	2155.67	0.935349	0.126342	7.40331	1.3283e-13	7.71909e-12
ENSG00000114850	SSR3	2585.98	0.526879	0.0714235	7.37683	1.62099e-13	9.37775e-12
ENSG00000130779	CLIP1	1279.67	0.716573	0.0973567	7.36028	1.83519e-13	1.05696e-11
ENSG00000147852	VLDLR	22.6577	4.91349	0.668182	7.35353	1.93043e-13	1.10687e-11
ENSG00000204387	C6orf48	917.325	0.748198	0.101882	7.34379	2.07623e-13	1.1852e-11
ENSG00000171867	PRNP	848.171	0.791721	0.107824	7.34271	2.09313e-13	1.18958e-11
ENSG00000101882	NKAP	367.693	0.774204	0.105556	7.33452	2.22519e-13	1.25909e-11
ENSG00000166046	TCP11L2	46.3024	2.2817	0.312872	7.29275	3.03701e-13	1.7035e-11
ENSG00000154265	ABCA5	437.091	0.834842	0.115379	7.23565	4.63313e-13	2.56532e-11
ENSG00000143013	LMO4	192.644	1.27359	0.176299	7.22399	5.04844e-13	2.77149e-11
ENSG00000106366	SERPINE1	1930.88	1.11102	0.154228	7.20375	5.85773e-13	3.20214e-11
ENSG00000181852	RNF41	83.8967	1.25705	0.174896	7.1874	6.60366e-13	3.59467e-11
ENSG00000183010	PYCR1	908.632	0.897294	0.125394	7.1558	8.31856e-13	4.49028e-11
ENSG00000104081	BMF	26.5213	2.43698	0.341762	7.13064	9.99035e-13	5.32306e-11
ENSG00000196998	WDR45	71.6906	1.40049	0.196772	7.11735	1.1002e-12	5.80226e-11
ENSG00000167861	HID1	92.5325	1.61079	0.226326	7.11714	1.10189e-12	5.80226e-11
ENSG00000167658	EEF2	10919.7	0.655382	0.0922002	7.10826	1.17517e-12	6.138e-11
ENSG00000150961	SEC24D	245.494	1.22943	0.173519	7.08528	1.38761e-12	7.16062e-11
ENSG00000112715	VEGFA	202.362	1.33035	0.189338	7.0263	2.12087e-12	1.08577e-10
ENSG00000168264	IRF2BP2	641.952	0.542748	0.0773668	7.01526	2.29517e-12	1.16575e-10
ENSG00000196182	STK40	327.749	0.818221	0.116849	7.00238	2.51645e-12	1.26815e-10
ENSG00000181019	NQO1	3982.71	0.476411	0.0681204	6.99366	2.67809e-12	1.33915e-10
ENSG00000167106	FAM102A	389.808	0.715805	0.103007	6.9491	3.6763e-12	1.83119e-10
ENSG00000100439	ABHD4	190.154	1.26121	0.18187	6.93469	4.07123e-12	2.00469e-10
ENSG00000128595	CALU	1728.05	0.615092	0.0892593	6.89107	5.53748e-12	2.69581e-10
ENSG00000115977	AAK1	342.265	1.17488	0.170649	6.88474	5.78924e-12	2.80778e-10
ENSG00000114796	KLHL24	73.4567	1.72298	0.250537	6.87715	6.10597e-12	2.9503e-10
ENSG00000227036	LINC00511	199.499	1.00902	0.146873	6.87003	6.41897e-12	3.08997e-10
ENSG00000131871	VIMP	1049.16	0.627163	0.0919877	6.8179	9.23836e-12	4.38177e-10
ENSG00000176142	TMEM39A	208.233	0.973851	0.143316	6.79515	1.08202e-11	5.07604e-10
ENSG00000066135	KDM4A	273.531	0.866514	0.127737	6.7836	1.17216e-11	5.47898e-10
ENSG00000050820	BCAR1	303.125	0.70869	0.104561	6.77775	1.22061e-11	5.68489e-10
ENSG00000108509	CAMTA2	101.525	1.07461	0.158724	6.77031	1.28511e-11	5.94236e-10
ENSG00000169504	CLIC4	425.245	1.0038	0.148283	6.76946	1.2926e-11	5.9515e-10
ENSG00000147872	PLIN2	2638.96	0.752236	0.111502	6.74642	1.51538e-11	6.9326e-10
ENSG00000197712	FAM114A1	323.216	0.869696	0.128924	6.74582	1.52166e-11	6.93672e-10
ENSG00000120889	TNFRSF10B	1026.95	0.665713	0.0991469	6.71441	1.88833e-11	8.51795e-10
ENSG00000136010	ALDH1L2	14.8829	3.79272	0.565303	6.70917	1.95734e-11	8.79254e-10
ENSG00000146859	TMEM140	18.6727	2.19852	0.327708	6.70876	1.96283e-11	8.79254e-10
ENSG00000140044	JDP2	16.5594	5.21208	0.777356	6.70488	2.01577e-11	8.99844e-10
ENSG00000165030	NFIL3	209.615	1.00762	0.150567	6.69219	2.19848e-11	9.74658e-10
ENSG00000108405	P2RX1	14.4574	7.54646	1.12819	6.68898	2.24724e-11	9.92865e-10
ENSG00000164938	TP53INP1	115.275	1.21726	0.182032	6.68705	2.27721e-11	1.00267e-09
ENSG00000116661	FBXO2	593.236	0.766014	0.114785	6.67347	2.49823e-11	1.09624e-09
ENSG00000179562	GCC1	252.179	0.984686	0.148111	6.64831	2.96484e-11	1.29221e-09
ENSG00000233016	SNHG7	627.836	0.74205	0.112655	6.58693	4.49007e-11	1.93734e-09
ENSG00000113712	CSNK1A1	1623.18	0.55055	0.0837772	6.5716	4.97763e-11	2.13343e-09
ENSG00000135540	NHSL1	346.618	0.696362	0.106025	6.56788	5.10354e-11	2.17296e-09
ENSG00000070081	NUCB2	1065.94	0.619702	0.0944524	6.561	5.34466e-11	2.26814e-09
ENSG00000165959	CLMN	212.622	0.633446	0.0969239	6.5355	6.33969e-11	2.68158e-09
ENSG00000167797	CDK2AP2	998.199	0.905962	0.138752	6.52938	6.60423e-11	2.77528e-09
ENSG00000135269	TES	413.242	0.919381	0.141118	6.51497	7.27054e-11	3.04536e-09
ENSG00000181045	SLC26A11	226.446	0.914643	0.140756	6.49809	8.13483e-11	3.39636e-09
ENSG00000033100	CHPF2	222.861	0.848057	0.13073	6.48707	8.7524e-11	3.6307e-09
ENSG00000175582	RAB6A	572.321	0.751506	0.115974	6.47995	9.17524e-11	3.78178e-09
ENSG00000204178	TMEM57	625.858	0.605017	0.0934112	6.47692	9.36136e-11	3.834e-09
ENSG00000105136	ZNF419	101.405	1.21651	0.188387	6.45752	1.06431e-10	4.31783e-09
ENSG00000168159	RNF187	460.574	0.780433	0.121495	6.42356	1.3312e-10	5.35008e-09
ENSG00000100664	EIF5	1706.71	0.456261	0.0713491	6.39477	1.60785e-10	6.42195e-09
ENSG00000023909	GCLM	844.693	0.85504	0.134121	6.37515	1.82779e-10	7.27787e-09
ENSG00000175224	ATG13	437.343	0.765443	0.120126	6.37198	1.86599e-10	7.40713e-09
ENSG00000164284	GRPEL2	113.588	1.01576	0.159454	6.37023	1.88742e-10	7.46921e-09
ENSG00000121552	CSTA	12.5977	3.35404	0.527063	6.36364	1.9703e-10	7.72607e-09
ENSG00000102316	MAGED2	340.978	0.567738	0.0892376	6.3621	1.99015e-10	7.78026e-09
ENSG00000114354	TFG	832.236	0.583629	0.0917608	6.36033	2.01316e-10	7.82283e-09
ENSG00000134440	NARS	1108.26	0.605006	0.0951852	6.3561	2.06945e-10	8.01741e-09
ENSG00000124839	RAB17	641.744	0.796906	0.125752	6.33711	2.34115e-10	8.94803e-09
ENSG00000184575	XPOT	219.407	1.32218	0.208856	6.33061	2.44194e-10	9.28167e-09
ENSG00000148690	FRA10AC1	475.653	0.604187	0.095443	6.33034	2.44614e-10	9.28167e-09
ENSG00000130487	KLHDC7B	20.5832	6.79689	1.07695	6.31123	2.76834e-10	1.04428e-08
ENSG00000164463	CREBRF	102.593	1.21285	0.192861	6.28875	3.20025e-10	1.20019e-08
ENSG00000171564	FGB	3594.97	0.418178	0.0667501	6.26483	3.73234e-10	1.39568e-08
ENSG00000170385	SLC30A1	271.084	0.946043	0.151132	6.25969	3.85734e-10	1.43567e-08
ENSG00000119820	YIPF4	679.69	0.592418	0.0946426	6.25952	3.86153e-10	1.43567e-08
ENSG00000198695	MT-ND6	2195.63	1.18546	0.19098	6.20724	5.39221e-10	1.99326e-08
ENSG00000153879	CEBPG	292.816	1.23304	0.199142	6.19175	5.94991e-10	2.19314e-08
ENSG00000132510	KDM6B	153.26	0.940146	0.152318	6.17227	6.73179e-10	2.44639e-08
ENSG00000197063	MAFG	1280.15	0.841948	0.136479	6.16905	6.86994e-10	2.48958e-08
ENSG00000164855	TMEM184A	228.442	0.91189	0.147889	6.16604	7.00229e-10	2.53044e-08
ENSG00000100897	DCAF11	669.584	0.729506	0.118668	6.14745	7.87406e-10	2.82962e-08
ENSG00000149150	SLC43A1	570.41	0.788807	0.128752	6.12658	8.97853e-10	3.19978e-08
ENSG00000132846	ZBED3	272.065	0.716975	0.117309	6.11186	9.84774e-10	3.49026e-08
ENSG00000154144	TBRG1	310.902	0.673914	0.110292	6.11028	9.94547e-10	3.51525e-08
ENSG00000099804	CDC34	746.891	0.763926	0.125328	6.09541	1.09157e-09	3.84763e-08
ENSG00000115806	GORASP2	841.663	0.494573	0.0811884	6.09168	1.11733e-09	3.92769e-08
ENSG00000171121	KCNMB3	149.915	1.14373	0.188086	6.08085	1.19545e-09	4.17953e-08
ENSG00000106080	FKBP14	498.577	0.682848	0.112557	6.06671	1.30555e-09	4.53986e-08
ENSG00000108828	VAT1	768.345	0.566859	0.0935245	6.06108	1.35209e-09	4.67648e-08
ENSG00000176845	METRNL	84.636	1.67691	0.276874	6.05659	1.39039e-09	4.79609e-08
ENSG00000164292	RHOBTB3	484.011	0.525998	0.0869973	6.04613	1.48362e-09	5.09047e-08
ENSG00000139644	TMBIM6	4746.44	0.430107	0.0712284	6.03841	1.55636e-09	5.32588e-08
ENSG00000138131	LOXL4	77.1605	1.27362	0.210997	6.0362	1.57781e-09	5.385e-08
ENSG00000139725	RHOF	284.676	0.911153	0.151479	6.01504	1.79842e-09	6.10565e-08
ENSG00000143575	HAX1	417.714	0.657952	0.109667	5.99955	1.97869e-09	6.68249e-08
ENSG00000132471	WBP2	602.279	0.62521	0.104321	5.99316	2.05802e-09	6.93226e-08
ENSG00000133639	BTG1	223.971	1.1127	0.185689	5.99228	2.06915e-09	6.95158e-08
ENSG00000179222	MAGED1	377.546	0.683193	0.114183	5.9833	2.18664e-09	7.30824e-08
ENSG00000260032	LINC00657	1884.01	0.446867	0.0746925	5.98276	2.19388e-09	7.31348e-08
ENSG00000080815	PSEN1	433.527	0.552992	0.0926477	5.96876	2.39067e-09	7.92855e-08
ENSG00000116285	ERRFI1	266.845	0.750006	0.125684	5.9674	2.41065e-09	7.9743e-08
ENSG00000105612	DNASE2	182.666	0.736272	0.123509	5.96128	2.50271e-09	8.23659e-08
ENSG00000104231	ZFAND1	65.5277	1.29857	0.218333	5.94765	2.72026e-09	8.90714e-08
ENSG00000120742	SERP1	900.358	0.576339	0.097089	5.93619	2.91726e-09	9.47999e-08
ENSG00000150540	HNMT	265.815	0.570432	0.0961882	5.93037	3.02257e-09	9.79753e-08
ENSG00000109083	IFT20	126.106	0.943589	0.15916	5.92854	3.05641e-09	9.88238e-08
ENSG00000125875	TBC1D20	573.171	0.572346	0.096603	5.92472	3.12833e-09	1.00896e-07
ENSG00000172375	C2CD2L	94.5726	1.17698	0.198829	5.91953	3.22867e-09	1.03873e-07
ENSG00000103249	CLCN7	164.275	0.793875	0.134269	5.91255	3.36843e-09	1.081e-07
ENSG00000101104	PABPC1L	343.767	1.4777	0.250331	5.90298	3.56987e-09	1.1428e-07
ENSG00000144867	SRPRB	1155.86	0.421876	0.0714818	5.90187	3.59404e-09	1.14769e-07
ENSG00000052841	TTC17	327.627	0.742893	0.126009	5.89556	3.73415e-09	1.18949e-07
ENSG00000267596	CCL15	149.168	0.833497	0.141714	5.88154	4.06475e-09	1.28844e-07
ENSG00000187193	MT1X	96.2105	2.09408	0.356658	5.87139	4.3216e-09	1.36315e-07
ENSG00000169242	EFNA1	290.579	0.869975	0.148727	5.84949	4.93079e-09	1.54774e-07
ENSG00000115839	RAB3GAP1	456.166	0.549397	0.094005	5.84434	5.08566e-09	1.59248e-07
ENSG00000151694	ADAM17	963.616	0.468151	0.0802249	5.83549	5.36343e-09	1.67539e-07
ENSG00000137876	RSL24D1	591.788	0.776295	0.133138	5.83074	5.51818e-09	1.71957e-07
ENSG00000123933	MXD4	395.135	0.716172	0.123126	5.8166	6.00576e-09	1.85804e-07
ENSG00000057593	F7	108.828	1.2038	0.207155	5.81113	6.2053e-09	1.91061e-07
ENSG00000033327	GAB2	106.368	1.18319	0.203686	5.80892	6.28787e-09	1.93142e-07
ENSG00000180398	MCFD2	1650.67	0.490243	0.0844902	5.80236	6.53861e-09	2.00306e-07
ENSG00000224596	ZMIZ1-AS1	15.278	2.42719	0.419105	5.79138	6.98122e-09	2.12919e-07
ENSG00000049759	NEDD4L	696.226	0.548815	0.0948251	5.78765	7.13766e-09	2.17177e-07
ENSG00000135929	CYP27A1	967.739	0.502657	0.0872443	5.76149	8.33749e-09	2.53087e-07
ENSG00000144130	NT5DC4	30.1016	1.72358	0.300301	5.73951	9.49518e-09	2.87159e-07
ENSG00000144566	RAB5A	249.296	0.861089	0.150033	5.73934	9.50446e-09	2.87159e-07
ENSG00000161653	NAGS	110.227	1.06242	0.185209	5.73636	9.6731e-09	2.90892e-07
ENSG00000052344	PRSS8	23.5809	3.43034	0.598048	5.73589	9.69997e-09	2.91022e-07
ENSG00000165113	GKAP1	197.76	0.782531	0.13703	5.71068	1.12528e-08	3.35271e-07
ENSG00000164733	CTSB	2627.84	0.455401	0.0797844	5.70789	1.14388e-08	3.40026e-07
ENSG00000165678	GHITM	1031.73	0.732223	0.128461	5.69997	1.19831e-08	3.5539e-07
ENSG00000196352	CD55	146.115	1.04057	0.182666	5.69655	1.22258e-08	3.60928e-07
ENSG00000086062	B4GALT1	545.188	0.601214	0.105803	5.68237	1.32839e-08	3.91268e-07
ENSG00000100226	GTPBP1	253.44	0.665846	0.117201	5.68121	1.33744e-08	3.93037e-07
ENSG00000139988	RDH12	36.654	1.95301	0.344476	5.6695	1.43213e-08	4.18954e-07
ENSG00000118689	FOXO3	151.479	1.1677	0.205988	5.66879	1.4381e-08	4.19749e-07
ENSG00000119760	SUPT7L	284.121	0.563323	0.0998069	5.64413	1.66023e-08	4.81318e-07
ENSG00000157954	WIPI2	586.559	0.48975	0.0868446	5.63939	1.70656e-08	4.93639e-07
ENSG00000164695	CHMP4C	145.356	0.938357	0.166538	5.63448	1.75584e-08	5.04502e-07
ENSG00000161202	DVL3	438.684	0.529797	0.0940751	5.63164	1.78502e-08	5.11745e-07
ENSG00000169925	BRD3	538.81	0.640769	0.113804	5.63047	1.79716e-08	5.14082e-07
ENSG00000059728	MXD1	208.036	0.81471	0.144816	5.62585	1.846e-08	5.24565e-07
ENSG00000042286	AIFM2	875.596	0.428953	0.0763134	5.62093	1.8993e-08	5.36977e-07
ENSG00000171621	SPSB1	151.051	1.10856	0.19723	5.62067	1.90217e-08	5.36977e-07
ENSG00000111912	NCOA7	286.968	0.734598	0.13076	5.6179	1.93294e-08	5.44472e-07
ENSG00000100284	TOM1	204.03	0.801851	0.142914	5.61073	2.01472e-08	5.65041e-07
ENSG00000184545	DUSP8	102.841	1.04565	0.186699	5.60075	2.13432e-08	5.95994e-07
ENSG00000177666	PNPLA2	211.886	0.671037	0.119939	5.59482	2.20851e-08	6.15378e-07
ENSG00000123989	CHPF	427.085	0.697755	0.125556	5.55731	2.73971e-08	7.5202e-07
ENSG00000063854	HAGH	303.992	0.556651	0.100196	5.5556	2.76658e-08	7.57785e-07
ENSG00000115677	HDLBP	2349.58	0.494391	0.0893922	5.53058	3.19172e-08	8.66871e-07
ENSG00000065060	UHRF1BP1	122.473	0.948585	0.171851	5.5198	3.39387e-08	9.14077e-07
ENSG00000198860	TSEN15	175.434	0.941292	0.171096	5.50154	3.76495e-08	1.00562e-06
ENSG00000151689	INPP1	187.317	0.884195	0.160857	5.49677	3.86816e-08	1.02893e-06
ENSG00000108861	DUSP3	510.932	0.445911	0.0813277	5.48289	4.18428e-08	1.10845e-06
ENSG00000140564	FURIN	491.001	0.760112	0.138891	5.47274	4.43136e-08	1.1691e-06
ENSG00000178607	ERN1	119.074	1.12959	0.206678	5.46547	4.61694e-08	1.20377e-06
ENSG00000119927	GPAM	1346.73	0.474997	0.0869098	5.4654	4.61876e-08	1.20377e-06
ENSG00000087086	FTL	36320.8	0.430648	0.0789863	5.45219	4.9754e-08	1.28891e-06
ENSG00000148426	PROSER2	143.083	0.903333	0.166198	5.43528	5.47104e-08	1.40882e-06
ENSG00000101076	HNF4A	599.308	0.568273	0.104606	5.4325	5.55687e-08	1.42523e-06
ENSG00000166340	TPP1	972.088	0.673444	0.124317	5.41717	6.05485e-08	1.54987e-06
ENSG00000196139	AKR1C3	710.887	0.55315	0.102121	5.4166	6.07417e-08	1.55174e-06
ENSG00000125686	MED1	1124.93	0.358958	0.0664216	5.40423	6.5086e-08	1.65616e-06
ENSG00000167671	UBXN6	460.801	0.628581	0.116472	5.39686	6.78162e-08	1.71548e-06
ENSG00000165915	SLC39A13	119	0.852127	0.15829	5.38332	7.31251e-08	1.83896e-06
ENSG00000129946	SHC2	38.8144	1.65642	0.307919	5.3794	7.4735e-08	1.87579e-06
ENSG00000109814	UGDH	2269.06	0.387821	0.0723573	5.35981	8.33118e-08	2.08296e-06
ENSG00000197622	CDC42SE1	225.299	0.942951	0.176103	5.35455	8.57677e-08	2.13608e-06
ENSG00000006704	GTF2IRD1	238.765	0.669215	0.12501	5.3533	8.6366e-08	2.14684e-06
ENSG00000125089	SH3TC1	21.9142	1.8841	0.35312	5.33559	9.52356e-08	2.35371e-06
ENSG00000112337	SLC17A2	46.4625	1.48526	0.278612	5.33092	9.77157e-08	2.41038e-06
ENSG00000136888	ATP6V1G1	1172.73	0.421166	0.079026	5.32946	9.85078e-08	2.42528e-06
ENSG00000124788	ATXN1	182.509	0.738371	0.139043	5.31037	1.09401e-07	2.68323e-06
ENSG00000118816	CCNI	1478.82	0.423083	0.0799265	5.2934	1.20063e-07	2.9225e-06
ENSG00000101849	TBL1X	549.881	0.538249	0.101751	5.28988	1.22397e-07	2.97371e-06
ENSG00000143878	RHOB	714.008	0.44343	0.0839346	5.28304	1.27056e-07	3.0811e-06
ENSG00000184014	DENND5A	258.681	0.616608	0.116854	5.27676	1.3149e-07	3.18266e-06
ENSG00000166900	STX3	288.657	0.645294	0.122329	5.27509	1.3269e-07	3.20569e-06
ENSG00000086544	ITPKC	99.3995	0.969843	0.183936	5.27271	1.34424e-07	3.2415e-06
ENSG00000152942	RAD17	163.334	0.644535	0.122322	5.26917	1.37039e-07	3.2984e-06
ENSG00000076826	CAMSAP3	313.382	0.772556	0.146695	5.26639	1.39131e-07	3.34252e-06
ENSG00000168374	ARF4	743.567	0.578737	0.110198	5.25178	1.50637e-07	3.55277e-06
ENSG00000198625	MDM4	282.556	0.753784	0.144018	5.23396	1.65915e-07	3.90596e-06
ENSG00000111981	ULBP1	4.52948	6.29913	1.20361	5.23354	1.6629e-07	3.90765e-06
ENSG00000197165	SULT1A2	323.82	0.624024	0.119516	5.22124	1.77725e-07	4.15369e-06
ENSG00000179632	MAF1	428.75	0.667358	0.127953	5.21565	1.83174e-07	4.27329e-06
ENSG00000074842	C19orf10	2864.16	0.569786	0.109376	5.20941	1.89438e-07	4.39558e-06
ENSG00000244754	N4BP2L2	499.244	0.569425	0.10936	5.2069	1.92023e-07	4.44755e-06
ENSG00000111252	SH2B3	74.3978	1.30509	0.250873	5.2022	1.96944e-07	4.55337e-06
ENSG00000122741	DCAF10	184.189	0.598333	0.115142	5.1965	2.03081e-07	4.68685e-06
ENSG00000244405	ETV5	274.359	0.803725	0.15587	5.15639	2.51761e-07	5.71826e-06
ENSG00000100441	KHNYN	218.231	0.654344	0.12727	5.14138	2.72728e-07	6.16192e-06
ENSG00000197122	SRC	186.532	0.698909	0.136044	5.13739	2.78586e-07	6.28329e-06
ENSG00000153132	CLGN	352.742	0.652067	0.126947	5.13652	2.7988e-07	6.30144e-06
ENSG00000198517	MAFK	818.823	0.632934	0.123235	5.136	2.80653e-07	6.30785e-06
ENSG00000164068	RNF123	377.381	0.638229	0.124405	5.13024	2.89374e-07	6.48692e-06
ENSG00000189339	SLC35E2B	266.914	0.862741	0.168225	5.12851	2.92045e-07	6.52976e-06
ENSG00000120805	ARL1	308.81	0.594561	0.116036	5.12395	2.992e-07	6.65513e-06
ENSG00000077232	DNAJC10	900.772	0.452854	0.0884395	5.12049	3.04739e-07	6.76667e-06
ENSG00000058262	SEC61A1	887.982	0.496833	0.0970521	5.11924	3.06769e-07	6.80006e-06
ENSG00000149231	CCDC82	723.95	0.559454	0.109325	5.11733	3.09899e-07	6.8459e-06
ENSG00000134686	PHC2	170.782	0.735541	0.143838	5.11369	3.15931e-07	6.94348e-06
ENSG00000116337	AMPD2	261.478	0.665515	0.130249	5.10957	3.22896e-07	7.08448e-06
ENSG00000088854	C20orf194	159.704	0.784459	0.153538	5.10922	3.23498e-07	7.08565e-06
ENSG00000130707	ASS1	164.403	0.652929	0.127941	5.10337	3.33656e-07	7.2711e-06
ENSG00000123240	OPTN	299.681	0.711873	0.139611	5.09899	3.41473e-07	7.4164e-06
ENSG00000168890	TMEM150A	100.029	0.754818	0.148135	5.09548	3.47855e-07	7.52965e-06
ENSG00000269893	SNHG8	926.97	0.538356	0.105775	5.08965	3.58728e-07	7.75201e-06
ENSG00000204348	DXO	112.445	0.858221	0.169227	5.07142	3.94856e-07	8.50423e-06
ENSG00000138678	AGPAT9	215.355	0.859135	0.169422	5.07099	3.95753e-07	8.50935e-06
ENSG00000117410	ATP6V0B	882.979	0.508606	0.100342	5.06872	4.00501e-07	8.5971e-06
ENSG00000068120	COASY	635.986	0.520005	0.102661	5.06528	4.07802e-07	8.73929e-06
ENSG00000140943	MBTPS1	469.88	0.51354	0.101672	5.05093	4.39666e-07	9.40231e-06
ENSG00000138660	AP1AR	189.652	0.724024	0.143351	5.0507	4.40198e-07	9.40231e-06
ENSG00000173327	MAP3K11	265.396	0.616965	0.122354	5.04246	4.59576e-07	9.78381e-06
ENSG00000100316	RPL3	2391.41	0.426272	0.0846367	5.03649	4.74135e-07	1.0044e-05
ENSG00000196323	ZBTB44	265.079	0.578677	0.114913	5.0358	4.75868e-07	1.00642e-05
ENSG00000163516	ANKZF1	169.837	0.784096	0.155802	5.03263	4.83791e-07	1.0215e-05
ENSG00000171608	PIK3CD	476.835	0.598865	0.119098	5.02832	4.94799e-07	1.04304e-05
ENSG00000174567	GOLT1A	103.678	0.809076	0.161479	5.0104	5.43162e-07	1.13387e-05
ENSG00000172164	SNTB1	246.36	0.883344	0.176462	5.00585	5.56158e-07	1.15913e-05
ENSG00000169359	SLC33A1	283.038	0.556891	0.111368	5.00046	5.71951e-07	1.1882e-05
ENSG00000069956	MAPK6	623.345	0.492091	0.0985077	4.99546	5.86959e-07	1.21352e-05
ENSG00000124198	ARFGEF2	471.372	0.595061	0.119203	4.992	5.97587e-07	1.22958e-05
ENSG00000171612	SLC25A33	248.711	0.650062	0.130363	4.98656	6.14633e-07	1.26264e-05
ENSG00000100991	TRPC4AP	568.239	0.467197	0.0937211	4.98498	6.19689e-07	1.271e-05
ENSG00000165813	C10orf118	620.195	0.720941	0.1447	4.98232	6.28259e-07	1.28246e-05
ENSG00000182378	PLCXD1	253.259	0.672078	0.135046	4.97665	6.46932e-07	1.31849e-05
ENSG00000068308	OTUD5	270.403	0.625422	0.12569	4.97589	6.49487e-07	1.32161e-05
ENSG00000114982	KANSL3	472.971	0.575435	0.115935	4.96344	6.92563e-07	1.40043e-05
ENSG00000162267	ITIH3	66.3986	1.07094	0.21602	4.95762	7.13634e-07	1.43629e-05
ENSG00000119523	ALG2	364.841	0.461206	0.0931943	4.94886	7.46484e-07	1.50006e-05
ENSG00000067082	KLF6	821.611	0.597273	0.120701	4.94838	7.48342e-07	1.50146e-05
ENSG00000140526	ABHD2	564.161	0.504209	0.101999	4.94327	7.68233e-07	1.53897e-05
ENSG00000129933	MAU2	256.574	0.621734	0.126127	4.92944	8.24676e-07	1.64438e-05
ENSG00000186529	CYP4F3	180.725	0.75661	0.15382	4.9188	8.70745e-07	1.72823e-05
ENSG00000033030	ZCCHC8	141.367	0.735099	0.150043	4.89926	9.62003e-07	1.88328e-05
ENSG00000115275	MOGS	339.762	0.538069	0.109936	4.89438	9.86179e-07	1.91051e-05
ENSG00000175899	A2M	3970.11	0.431955	0.0882684	4.89365	9.8982e-07	1.91449e-05
ENSG00000104765	BNIP3L	91.2272	0.928632	0.189936	4.88919	1.01251e-06	1.95544e-05
ENSG00000130517	PGPEP1	468.874	0.532839	0.109124	4.88286	1.04556e-06	2.01625e-05
ENSG00000186951	PPARA	111.402	0.848553	0.173912	4.87922	1.06508e-06	2.05084e-05
ENSG00000124222	STX16	654.925	0.468506	0.0961055	4.87491	1.08857e-06	2.08672e-05
ENSG00000185022	MAFF	279.657	0.797481	0.164249	4.85531	1.20201e-06	2.28719e-05
ENSG00000140854	KATNB1	172.89	0.748412	0.154274	4.85118	1.22727e-06	2.3228e-05
ENSG00000106052	TAX1BP1	2355.7	0.449984	0.092904	4.84353	1.27551e-06	2.40575e-05
ENSG00000145817	YIPF5	555.707	0.539979	0.111552	4.84061	1.2944e-06	2.43072e-05
ENSG00000272405	RP11-284F21.10	145.445	0.872405	0.180567	4.83149	1.35515e-06	2.53373e-05
ENSG00000242372	EIF6	2337.52	0.486114	0.100664	4.82907	1.37173e-06	2.56103e-05
ENSG00000068323	TFE3	170.459	0.863814	0.178969	4.8266	1.38886e-06	2.58552e-05
ENSG00000155256	ZFYVE27	117.081	0.774297	0.160449	4.82582	1.39427e-06	2.59186e-05
ENSG00000107372	ZFAND5	458.855	0.462663	0.0959969	4.81956	1.43874e-06	2.66683e-05
ENSG00000196411	EPHB4	445.506	0.610826	0.127419	4.79385	1.63608e-06	2.99817e-05
ENSG00000095787	WAC	1008.32	0.419557	0.0877488	4.78134	1.74134e-06	3.17542e-05
ENSG00000107175	CREB3	185.324	0.595658	0.124584	4.78118	1.74265e-06	3.17542e-05
ENSG00000157020	SEC13	677.53	0.396725	0.0829849	4.78069	1.74696e-06	3.17878e-05
ENSG00000162298	SYVN1	287.823	0.6439	0.134711	4.77985	1.75423e-06	3.18751e-05
ENSG00000144591	GMPPA	241.349	0.652711	0.136605	4.77807	1.76983e-06	3.20649e-05
ENSG00000168894	RNF181	686.896	0.548604	0.114836	4.7773	1.77666e-06	3.20649e-05
ENSG00000113742	CPEB4	142.33	0.828047	0.17382	4.76381	1.89969e-06	3.40388e-05
ENSG00000125952	MAX	363.171	0.545705	0.114622	4.7609	1.92731e-06	3.44218e-05
ENSG00000167703	SLC43A2	346.034	0.577666	0.12134	4.76072	1.92907e-06	3.44218e-05
ENSG00000261770	CTC-459F4.1	9.40449	3.13627	0.659577	4.75497	1.98477e-06	3.5318e-05
ENSG00000242802	AP5Z1	737.844	0.724821	0.152608	4.74957	2.03849e-06	3.62238e-05
ENSG00000134759	ELP2	284.175	0.505145	0.106443	4.74568	2.07805e-06	3.67749e-05
ENSG00000141101	NOB1	615.977	0.439999	0.0927803	4.74238	2.11226e-06	3.72782e-05
ENSG00000148248	SURF4	2132.31	0.304743	0.064321	4.73784	2.16005e-06	3.80174e-05
ENSG00000177479	ARIH2	786.056	0.432775	0.0913696	4.73653	2.17404e-06	3.82116e-05
ENSG00000158669	AGPAT6	474.403	0.552506	0.117016	4.72165	2.33937e-06	4.09501e-05
ENSG00000107742	SPOCK2	297.864	0.705004	0.14966	4.71071	2.4686e-06	4.3037e-05
ENSG00000101294	HM13	1073.24	0.465872	0.0989811	4.70668	2.51785e-06	4.37185e-05
ENSG00000083799	CYLD	76.7977	0.918754	0.19522	4.70625	2.52319e-06	4.37523e-05
ENSG00000104388	RAB2A	944.336	0.436823	0.0928359	4.70532	2.53465e-06	4.38919e-05
ENSG00000073921	PICALM	472.701	0.473218	0.100704	4.6991	2.6131e-06	4.51898e-05
ENSG00000154803	FLCN	231.099	0.702853	0.149742	4.69376	2.68225e-06	4.62617e-05
ENSG00000186594	MIR22HG	281.945	0.861269	0.183562	4.69198	2.70574e-06	4.66045e-05
ENSG00000227192	RP1-45I4.3	19.1958	1.44719	0.309122	4.68161	2.84634e-06	4.88307e-05
ENSG00000154781	CCDC174	319.638	0.610497	0.130533	4.67695	2.91172e-06	4.97538e-05
ENSG00000212734	C17orf100	50.9764	0.967656	0.207071	4.67306	2.96739e-06	5.05041e-05
ENSG00000063587	ZNF275	84.6257	0.830817	0.177799	4.67279	2.97129e-06	5.05041e-05
ENSG00000127241	MASP1	6.17693	2.82516	0.604647	4.67241	2.97684e-06	5.05318e-05
ENSG00000119986	AVPI1	202.935	0.569353	0.121887	4.67117	2.99487e-06	5.07711e-05
ENSG00000168300	PCMTD1	53.2815	1.16953	0.250451	4.66968	3.01672e-06	5.10744e-05
ENSG00000105856	HBP1	109.138	0.899866	0.192728	4.6691	3.02526e-06	5.11519e-05
ENSG00000177410	ZFAS1	3024.06	0.650485	0.139347	4.6681	3.03998e-06	5.12664e-05
ENSG00000196072	BLOC1S2	626.668	0.390994	0.0838402	4.66356	3.10789e-06	5.2275e-05
ENSG00000082641	NFE2L1	369.141	0.486036	0.104237	4.6628	3.11933e-06	5.23991e-05
ENSG00000081791	KIAA0141	179.191	0.713174	0.153376	4.64985	3.32173e-06	5.52951e-05
ENSG00000101150	TPD52L2	1493.04	0.414243	0.0891043	4.64897	3.33603e-06	5.53901e-05
ENSG00000229017	RP11-439L18.3	24.1003	1.51469	0.326556	4.63839	3.51127e-06	5.81501e-05
ENSG00000006453	BAIAP2L1	471.9	0.572337	0.123539	4.63285	3.60669e-06	5.95773e-05
ENSG00000180879	SSR4	237.72	0.620398	0.133953	4.63144	3.63125e-06	5.99064e-05
ENSG00000176407	KCMF1	824.924	0.565373	0.122141	4.62886	3.67689e-06	6.05046e-05
ENSG00000186866	POFUT2	111.919	0.854928	0.184785	4.62661	3.71695e-06	6.10858e-05
ENSG00000158828	PINK1	57.2838	0.959715	0.207562	4.62375	3.76862e-06	6.16992e-05
ENSG00000168522	FNTA	297.142	0.58559	0.126735	4.62057	3.82688e-06	6.24943e-05
ENSG00000163479	SSR2	841.312	0.396129	0.0860007	4.60612	4.10256e-06	6.66589e-05
ENSG00000135926	TMBIM1	1132.7	0.400185	0.087015	4.59903	4.24459e-06	6.87623e-05
ENSG00000197324	LRP10	103.306	0.81779	0.178224	4.58855	4.46327e-06	7.19758e-05
ENSG00000130703	OSBPL2	301.733	0.515147	0.112293	4.58753	4.48525e-06	7.21499e-05
ENSG00000140297	GCNT3	279.15	0.576327	0.125698	4.58503	4.53918e-06	7.28358e-05
ENSG00000124783	SSR1	1933.57	0.292227	0.0638324	4.57803	4.69386e-06	7.50377e-05
ENSG00000197746	PSAP	5614.15	0.460034	0.100505	4.57723	4.71175e-06	7.52305e-05
ENSG00000122557	HERPUD2	122.777	0.842303	0.184075	4.57586	4.74275e-06	7.56319e-05
ENSG00000174851	YIF1A	695.214	0.497963	0.108845	4.57495	4.76332e-06	7.57586e-05
ENSG00000196660	SLC30A10	65.6386	1.08112	0.23637	4.57385	4.78835e-06	7.59834e-05
ENSG00000133112	TPT1	14257.5	0.477179	0.104394	4.57096	4.85504e-06	7.6947e-05
ENSG00000129474	AJUBA	184.553	0.640772	0.140292	4.56743	4.9374e-06	7.81563e-05
ENSG00000105784	RUNDC3B	55.8038	0.968293	0.212441	4.55794	5.16589e-06	8.14732e-05
ENSG00000166912	MTMR10	104.266	0.770324	0.169057	4.5566	5.19885e-06	8.18929e-05
ENSG00000137285	TUBB2B	45.5214	1.87315	0.411187	4.55548	5.22666e-06	8.21659e-05
ENSG00000121410	A1BG	43.1285	1.18921	0.261118	4.55428	5.25642e-06	8.24976e-05
ENSG00000166888	STAT6	300.491	0.537124	0.118273	4.54139	5.58847e-06	8.73902e-05
ENSG00000143093	STRIP1	265.876	0.509576	0.112332	4.53635	5.72356e-06	8.91784e-05
ENSG00000109065	NAT9	154.362	0.6729	0.148467	4.53234	5.83344e-06	9.07808e-05
ENSG00000025796	SEC63	1201.34	0.385945	0.0854407	4.51712	6.26874e-06	9.68539e-05
ENSG00000260923	AC137934.1	14.5706	3.04291	0.67402	4.51458	6.34436e-06	9.78098e-05
ENSG00000158552	ZFAND2B	138.396	0.645508	0.143066	4.51196	6.42325e-06	9.88858e-05
ENSG00000110925	CSRNP2	42.8578	1.195	0.264919	4.51082	6.45761e-06	9.92726e-05
ENSG00000111275	ALDH2	701.619	0.460786	0.102156	4.51062	6.46376e-06	9.92726e-05
ENSG00000022840	RNF10	502.419	0.569252	0.126258	4.50866	6.52391e-06	9.99584e-05
ENSG00000153714	LURAP1L	43.2109	1.42322	0.31609	4.50257	6.71354e-06	0.00010262
ENSG00000156510	HKDC1	706.857	0.50068	0.111542	4.4887	7.16604e-06	0.00010902
ENSG00000121067	SPOP	718.26	0.540969	0.120586	4.48617	7.25133e-06	0.000110058
ENSG00000138760	SCARB2	352.906	0.439391	0.0979895	4.48407	7.32342e-06	0.000110954
ENSG00000147535	PPAPDC1B	282.192	0.457211	0.101966	4.48394	7.32756e-06	0.000110954
ENSG00000011132	APBA3	203.185	0.638042	0.142375	4.48141	7.41503e-06	0.000112147
ENSG00000150593	PDCD4	171.63	0.839325	0.187422	4.47826	7.52527e-06	0.000113551
ENSG00000141376	BCAS3	82.3106	0.954086	0.213058	4.47805	7.53285e-06	0.000113551
ENSG00000007372	PAX6	179.935	0.643907	0.143969	4.47255	7.72908e-06	0.000116351
ENSG00000112245	PTP4A1	3044.39	0.410693	0.0918375	4.47195	7.75083e-06	0.000116543
ENSG00000253368	TRNP1	274.179	0.643303	0.143863	4.47164	7.76222e-06	0.000116578
ENSG00000142541	RPL13A	9911.07	0.409697	0.0916493	4.47027	7.81221e-06	0.000117192
ENSG00000166278	C2	272.312	0.599543	0.134129	4.46991	7.82538e-06	0.000117253
ENSG00000120708	TGFBI	1053.71	0.451595	0.101143	4.46491	8.01037e-06	0.000119886
ENSG00000119669	IRF2BPL	151.495	0.768644	0.17218	4.46419	8.03707e-06	0.000120146
ENSG00000164615	CAMLG	359.763	0.515268	0.115804	4.4495	8.607e-06	0.000127925
ENSG00000166987	MBD6	278.199	0.590814	0.132815	4.44841	8.65076e-06	0.000128428
ENSG00000099260	PALMD	153.913	0.580504	0.130549	4.44665	8.72214e-06	0.000129042
ENSG00000159720	ATP6V0D1	204.377	0.537621	0.121109	4.43915	9.03128e-06	0.000133157
ENSG00000042445	RETSAT	863.206	0.519885	0.117141	4.4381	9.07553e-06	0.000133657
ENSG00000169100	SLC25A6	2620.73	0.440055	0.0992237	4.43498	9.20797e-06	0.000135453
ENSG00000175203	DCTN2	507.505	0.511373	0.1154	4.43133	9.36542e-06	0.000137299
ENSG00000044115	CTNNA1	844.504	0.387636	0.0874852	4.43087	9.38523e-06	0.000137433
ENSG00000143761	ARF1	1630.01	0.310289	0.0700395	4.4302	9.41467e-06	0.000137671
ENSG00000167987	VPS37C	199.843	0.523593	0.118215	4.42916	9.46029e-06	0.000138062
ENSG00000165516	KLHDC2	142.918	0.676156	0.152819	4.42456	9.66395e-06	0.000140875
ENSG00000175215	CTDSP2	294.623	0.63248	0.142975	4.42372	9.70138e-06	0.000141261
ENSG00000106245	BUD31	413.808	0.42944	0.0971406	4.42081	9.83326e-06	0.000142859
ENSG00000268205	CTC-444N24.11	296.603	0.623053	0.141053	4.41716	1.00006e-05	0.000145127
ENSG00000186204	CYP4F12	68.9713	0.817293	0.185278	4.41116	1.02817e-05	0.000148872
ENSG00000124831	LRRFIP1	2194	0.44402	0.100859	4.40239	1.07066e-05	0.000154181
ENSG00000078246	TULP3	228.805	0.637879	0.144967	4.40018	1.08162e-05	0.000155563
ENSG00000095380	NANS	491.436	0.436919	0.0993976	4.39567	1.10432e-05	0.000158475
ENSG00000129083	COPB1	642.248	0.34363	0.0782101	4.39369	1.11445e-05	0.000159751
ENSG00000100528	CNIH1	769.74	0.42671	0.0972475	4.38788	1.14461e-05	0.000163528
ENSG00000091527	CDV3	1704.65	0.442092	0.100784	4.38651	1.15183e-05	0.000164378
ENSG00000212907	MT-ND4L	11446.3	0.47491	0.108565	4.37444	1.21747e-05	0.00017279
ENSG00000109332	UBE2D3	1745.34	0.334511	0.0764855	4.37352	1.22257e-05	0.000173322
ENSG00000235899	RP11-345L23.1	15.4475	3.51322	0.803819	4.37067	1.23867e-05	0.000175221
ENSG00000103264	FBXO31	404.942	0.657579	0.151062	4.35305	1.34254e-05	0.000189291
ENSG00000071626	DAZAP1	1336.66	0.353737	0.0813132	4.3503	1.35949e-05	0.000191472
ENSG00000114942	EEF1B2	5448.5	0.281128	0.0646851	4.3461	1.38577e-05	0.000194748
ENSG00000124570	SERPINB6	157.239	0.642649	0.147909	4.3449	1.3934e-05	0.000195607
ENSG00000181789	COPG1	371.661	0.631433	0.145748	4.33237	1.47515e-05	0.000206162
ENSG00000149115	TNKS1BP1	52.9322	1.12373	0.259473	4.33083	1.48551e-05	0.000207184
ENSG00000170293	CMTM8	301.452	0.509982	0.117797	4.32933	1.49565e-05	0.000207925
ENSG00000106636	YKT6	843.074	0.416818	0.0962903	4.32876	1.49953e-05	0.000208239
ENSG00000116701	NCF2	199.588	1.59805	0.36971	4.32244	1.54316e-05	0.00021351
ENSG00000105443	CYTH2	114.771	0.85456	0.198175	4.31214	1.61684e-05	0.000221577
ENSG00000196233	LCOR	297.082	0.559746	0.129811	4.31199	1.6179e-05	0.000221577
ENSG00000162032	SPSB3	84.8619	0.928439	0.215336	4.31157	1.62097e-05	0.000221761
ENSG00000142186	SCYL1	398.657	0.571133	0.132477	4.31118	1.62387e-05	0.0002219
ENSG00000136925	TSTD2	114.068	0.631269	0.146462	4.31012	1.63166e-05	0.000222281
ENSG00000078269	SYNJ2	292.035	0.490109	0.113825	4.30582	1.66372e-05	0.000226171
ENSG00000023287	RB1CC1	1045.75	0.587194	0.136673	4.29633	1.73649e-05	0.000234826
ENSG00000186350	RXRA	376.562	0.514323	0.119765	4.29444	1.75131e-05	0.000236088
ENSG00000187796	CARD9	34.509	1.13021	0.263219	4.2938	1.75644e-05	0.000236532
ENSG00000113504	SLC12A7	434.114	0.623258	0.145367	4.28749	1.80706e-05	0.000242338
ENSG00000152102	FAM168B	463.659	0.390695	0.0911343	4.28703	1.81079e-05	0.000242585
ENSG00000262585	RP11-353N14.5	11.7979	1.64645	0.384554	4.28146	1.8567e-05	0.000248478
ENSG00000166275	C10orf32	180.674	0.579177	0.135589	4.27156	1.94106e-05	0.000257895
ENSG00000143457	GOLPH3L	126.662	0.556174	0.130246	4.27019	1.95307e-05	0.000259224
ENSG00000058600	POLR3E	231.128	0.508415	0.1191	4.26881	1.96519e-05	0.000260297
ENSG00000188483	IER5L	31.9838	1.01878	0.23899	4.26287	2.01821e-05	0.000266772
ENSG00000168495	POLR3D	249.286	0.622259	0.146513	4.24711	2.16543e-05	0.000285063
ENSG00000071082	RPL31	8426.9	0.327831	0.0772005	4.24649	2.17148e-05	0.000285569
ENSG00000213614	HEXA	308.102	0.376595	0.0887171	4.2449	2.18694e-05	0.000287308
ENSG00000176624	MEX3C	139.803	0.677597	0.159692	4.24314	2.20412e-05	0.000288978
ENSG00000106927	AMBP	7796.36	0.362152	0.0853686	4.24222	2.21319e-05	0.000289579
ENSG00000177045	SIX5	98.4747	0.739386	0.174498	4.23723	2.26297e-05	0.000294895
ENSG00000162878	PKDCC	150.636	0.682541	0.161137	4.23579	2.27749e-05	0.000296188
ENSG00000089289	IGBP1	313.301	0.512609	0.121055	4.2345	2.29057e-05	0.00029759
ENSG00000074964	ARHGEF10L	367.98	0.588423	0.138981	4.23382	2.29753e-05	0.000298194
ENSG00000138069	RAB1A	1363.06	0.38058	0.0899341	4.23177	2.31862e-05	0.000300628
ENSG00000047346	FAM214A	57.8693	0.961215	0.227208	4.23054	2.3313e-05	0.000301969
ENSG00000086619	ERO1LB	71.6753	1.20159	0.284148	4.22875	2.34995e-05	0.00030408
ENSG00000165861	ZFYVE1	98.6976	0.844047	0.199665	4.22731	2.36505e-05	0.000305727
ENSG00000174749	C4orf32	77.4266	0.843865	0.199639	4.22696	2.36869e-05	0.00030589
ENSG00000161714	PLCD3	113.9	0.73305	0.173488	4.22537	2.38552e-05	0.000307448
ENSG00000013441	CLK1	310.606	0.536768	0.127151	4.22152	2.42665e-05	0.000311955
ENSG00000151327	FAM177A1	555.353	0.360833	0.0856347	4.21363	2.51303e-05	0.000322593
ENSG00000143614	GATAD2B	252.573	0.536943	0.127745	4.20323	2.63135e-05	0.000336109
ENSG00000174780	SRP72	1385.94	0.432469	0.102896	4.20296	2.63449e-05	0.000336178
ENSG00000197043	ANXA6	410.58	0.496639	0.118315	4.19759	2.69774e-05	0.00034323
ENSG00000167996	FTH1	5241.04	0.350849	0.083698	4.19185	2.76689e-05	0.000349614
ENSG00000100417	PMM1	76.8103	0.781729	0.186509	4.19138	2.77258e-05	0.000349991
ENSG00000137221	TJAP1	195.468	0.634839	0.152334	4.16742	3.0806e-05	0.000386228
ENSG00000074695	LMAN1	3909.45	0.370808	0.0891442	4.15964	3.1875e-05	0.000398855
ENSG00000263711	RP11-169F17.1	112.504	0.737333	0.177383	4.15673	3.22835e-05	0.000403575
ENSG00000205336	GPR56	145.19	0.736837	0.177317	4.15548	3.24608e-05	0.000405399
ENSG00000119844	AFTPH	324.463	0.379757	0.091477	4.15139	3.3046e-05	0.000412309
ENSG00000100418	DESI1	210.168	0.644842	0.155443	4.14843	3.34769e-05	0.000417281
ENSG00000102226	USP11	265.603	0.493077	0.118867	4.14813	3.35203e-05	0.000417418
ENSG00000138073	PREB	562.902	0.448862	0.108234	4.14716	3.36622e-05	0.000418735
ENSG00000161904	LEMD2	194.121	0.556563	0.134255	4.14556	3.38983e-05	0.000420907
ENSG00000147324	MFHAS1	560.41	0.489149	0.11803	4.14427	3.40897e-05	0.00042247
ENSG00000105186	ANKRD27	84.1056	0.770942	0.186143	4.14167	3.44784e-05	0.000426877
ENSG00000067606	PRKCZ	326.961	0.588138	0.142014	4.14141	3.45184e-05	0.000426963
ENSG00000141002	TCF25	1107.1	0.56326	0.136025	4.14087	3.4599e-05	0.00042714
ENSG00000067066	SP100	151.225	0.619282	0.149717	4.13635	3.52877e-05	0.000434159
ENSG00000064652	SNX24	153.612	0.546268	0.132282	4.12956	3.63462e-05	0.000445725
ENSG00000185624	P4HB	4233.09	0.332785	0.0806524	4.12616	3.68864e-05	0.00045192
ENSG00000179818	PCBP1-AS1	87.8153	0.805667	0.19545	4.12211	3.75411e-05	0.000459505
ENSG00000139433	GLTP	175.809	0.598594	0.145419	4.11633	3.84952e-05	0.000469402
ENSG00000164631	ZNF12	145.342	0.560473	0.136224	4.11434	3.8829e-05	0.000472579
ENSG00000104419	NDRG1	78.8734	0.949822	0.231047	4.11094	3.94047e-05	0.000479134
ENSG00000106853	PTGR1	163.11	0.682939	0.166227	4.10848	3.98265e-05	0.000483806
ENSG00000109220	CHIC2	76.2181	1.0594	0.258181	4.10333	4.07243e-05	0.000493319
ENSG00000172888	ZNF621	176.235	0.622516	0.151725	4.10291	4.07989e-05	0.000493759
ENSG00000152256	PDK1	75.7754	0.755202	0.184485	4.09356	4.24808e-05	0.000512671
ENSG00000168397	ATG4B	565.543	0.533905	0.130693	4.08518	4.40432e-05	0.000530534
ENSG00000131791	PRKAB2	337.715	0.518997	0.127156	4.08159	4.47291e-05	0.000537291
ENSG00000147162	OGT	181.478	0.802701	0.197037	4.07387	4.62385e-05	0.000553488
ENSG00000112305	SMAP1	163.76	0.548257	0.134581	4.07382	4.62491e-05	0.000553488
ENSG00000103126	AXIN1	118.377	0.630599	0.155117	4.06532	4.79669e-05	0.000571923
ENSG00000149798	CDC42EP2	41.0461	1.02975	0.253754	4.05806	4.94814e-05	0.000586728
ENSG00000128311	TST	170.128	0.642308	0.158452	4.05366	5.04232e-05	0.000596251
ENSG00000147174	ACRC	11.7539	1.97109	0.487128	4.04635	5.20221e-05	0.000613471
ENSG00000183020	AP2A2	260.585	0.528879	0.130801	4.04338	5.26865e-05	0.000620173
ENSG00000113615	SEC24A	168.501	0.678969	0.168134	4.03826	5.38497e-05	0.000632825
ENSG00000112183	RBM24	68.7314	1.0176	0.251991	4.03821	5.38595e-05	0.000632825
ENSG00000119242	CCDC92	166.448	0.606548	0.150331	4.03476	5.46588e-05	0.000641049
ENSG00000136238	RAC1	2062.32	0.338537	0.0841039	4.02522	5.69218e-05	0.000663849
ENSG00000076604	TRAF4	316.895	0.415053	0.103324	4.01701	5.89422e-05	0.000685057
ENSG00000084731	KIF3C	75.415	1.02946	0.256582	4.01219	6.01589e-05	0.000696062
ENSG00000072121	ZFYVE26	91.3059	0.629484	0.157141	4.00585	6.17941e-05	0.000713064
ENSG00000145919	BOD1	280.231	0.469247	0.117158	4.00524	6.19543e-05	0.000714274
ENSG00000003989	SLC7A2	101.165	0.675182	0.168939	3.9966	6.42581e-05	0.000737539
ENSG00000140264	SERF2	3119.42	0.341811	0.0856616	3.99024	6.60052e-05	0.000756247
ENSG00000104312	RIPK2	123.382	0.664481	0.166583	3.98889	6.63845e-05	0.000759917
ENSG00000197343	ZNF655	180.431	0.470539	0.118011	3.98724	6.6846e-05	0.000764521
ENSG00000186591	UBE2H	409.947	0.461696	0.116056	3.97821	6.94358e-05	0.000792736
ENSG00000109686	SH3D19	111.603	0.62057	0.156126	3.97479	7.04403e-05	0.000802783
ENSG00000197958	RPL12	3231.67	0.361069	0.0908912	3.97254	7.11098e-05	0.000808984
ENSG00000153885	KCTD15	42.2438	0.888105	0.223651	3.97094	7.15888e-05	0.000813
ENSG00000013375	PGM3	327.16	0.411042	0.103548	3.96957	7.20031e-05	0.000816985
ENSG00000225828	FAM229A	24.7308	1.56302	0.394515	3.96188	7.43618e-05	0.000842267
ENSG00000187017	ESPN	116.815	0.580047	0.146504	3.95925	7.51853e-05	0.000849914
ENSG00000179195	ZNF664	290.823	0.417468	0.105442	3.95922	7.51937e-05	0.000849914
ENSG00000111678	C12orf57	231.686	0.514739	0.130014	3.95909	7.52346e-05	0.000849914
ENSG00000162191	UBXN1	400.555	0.480028	0.12149	3.95115	7.77752e-05	0.000876222
ENSG00000141551	CSNK1D	647.487	0.315724	0.0799104	3.95097	7.78351e-05	0.000876222
ENSG00000158850	B4GALT3	247.884	0.43926	0.111521	3.93879	8.18931e-05	0.000918698
ENSG00000179918	SEPHS2	917.352	0.400585	0.10175	3.93697	8.25174e-05	0.000924898
ENSG00000101004	NINL	221.183	0.665916	0.169292	3.93355	8.3702e-05	0.00093552
ENSG00000097033	SH3GLB1	405.406	0.48683	0.123768	3.93339	8.37551e-05	0.00093552
ENSG00000198833	UBE2J1	257.448	0.475119	0.12095	3.92824	8.55689e-05	0.000951659
ENSG00000161573	CCL16	170.859	0.548706	0.139972	3.92012	8.85058e-05	0.000981783
ENSG00000146904	EPHA1	54.4186	0.70661	0.180341	3.91819	8.92181e-05	0.000987941
ENSG00000129292	PHF20L1	465.959	0.437069	0.111555	3.91799	8.92907e-05	0.000987941
ENSG00000103160	HSDL1	151.215	0.620372	0.158634	3.9107	9.20289e-05	0.00101476
ENSG00000006451	RALA	893.734	0.39767	0.10186	3.90408	9.45837e-05	0.00104115
ENSG00000140939	NOL3	40.6654	1.01383	0.259788	3.90254	9.51892e-05	0.00104692
ENSG00000198755	RPL10A	5961.69	0.324044	0.0833102	3.88961	0.000100404	0.00110334
ENSG00000167881	SRP68	463.081	0.383062	0.0985338	3.88762	0.000101231	0.00111053
ENSG00000168710	AHCYL1	1935.06	0.403527	0.103827	3.88654	0.000101685	0.00111267
ENSG00000105379	ETFB	2491.48	0.397798	0.102379	3.88556	0.000102096	0.00111622
ENSG00000141699	FAM134C	153.481	0.5638	0.145377	3.8782	0.000105233	0.00114663
ENSG00000123106	CCDC91	214.321	0.630484	0.162699	3.87515	0.000106557	0.0011591
ENSG00000115649	CNPPD1	438.272	0.547481	0.141421	3.87127	0.000108269	0.00117574
ENSG00000137869	CYP19A1	109.07	0.674085	0.174243	3.86865	0.000109439	0.00118322
ENSG00000174136	RGMB	57.0675	0.775774	0.200823	3.86297	0.000112017	0.00120932
ENSG00000239305	RNF103	360.605	0.484902	0.12557	3.8616	0.000112648	0.00121511
ENSG00000140265	ZSCAN29	204.232	0.558329	0.144719	3.85802	0.000114311	0.00123099
ENSG00000198146	ZNF770	532.036	0.445929	0.115806	3.85066	0.000117802	0.00126226
ENSG00000153982	GDPD1	58.75	0.988428	0.256993	3.84613	0.000119997	0.00128385
ENSG00000076864	RAP1GAP	82.6973	0.77589	0.201864	3.84362	0.000121232	0.00129472
ENSG00000124143	ARHGAP40	18.3985	1.59885	0.416008	3.84332	0.000121382	0.00129525
ENSG00000160007	ARHGAP35	443.102	0.36245	0.0943453	3.84173	0.000122168	0.00130256
ENSG00000148584	A1CF	463.445	0.352364	0.0917596	3.84008	0.000122995	0.00131028
ENSG00000166908	PIP4K2C	259.863	0.455446	0.11861	3.83987	0.000123101	0.00131033
ENSG00000136802	LRRC8A	531.45	0.440759	0.114832	3.83829	0.000123893	0.00131715
ENSG00000073849	ST6GAL1	588.191	0.33587	0.0875074	3.83819	0.000123946	0.00131715
ENSG00000099812	MISP	79.1233	0.892912	0.232656	3.83791	0.000124087	0.00131757
ENSG00000138768	USO1	486.321	0.4303	0.112133	3.8374	0.000124346	0.00131923
ENSG00000147010	SH3KBP1	441.693	0.477017	0.124342	3.83633	0.000124889	0.0013239
ENSG00000090013	BLVRB	241.165	0.539585	0.140968	3.82771	0.000129341	0.00136885
ENSG00000140743	CDR2	214.939	0.635407	0.166494	3.81639	0.000135416	0.00143064
ENSG00000172086	KRCC1	83.4993	0.706674	0.185176	3.81622	0.000135512	0.00143064
ENSG00000106638	TBL2	212.645	0.450835	0.118208	3.81393	0.000136777	0.00144281
ENSG00000142484	TM4SF5	263.019	0.460226	0.120699	3.813	0.000137291	0.00144706
ENSG00000149428	HYOU1	2054.94	0.444049	0.116484	3.81211	0.000137785	0.00144989
ENSG00000184840	TMED9	2558.06	0.414473	0.108868	3.80712	0.000140596	0.00147826
ENSG00000160183	TMPRSS3	3.8465	2.40822	0.633707	3.80022	0.000144568	0.00151755
ENSG00000130741	EIF2S3	329.829	0.361609	0.0952675	3.79572	0.000147215	0.00154283
ENSG00000143776	CDC42BPA	319.842	0.444287	0.117213	3.79043	0.000150385	0.00157289
ENSG00000163870	TPRA1	183.004	0.596056	0.157257	3.79033	0.00015045	0.00157289
ENSG00000141627	DYM	81.0771	0.712965	0.188697	3.77837	0.00015786	0.00164903
ENSG00000214078	CPNE1	1583.31	0.405849	0.107481	3.776	0.00015937	0.00166346
ENSG00000038002	AGA	150.315	0.499627	0.132444	3.77236	0.000161709	0.00168651
ENSG00000108846	ABCC3	330.58	0.393187	0.104256	3.77137	0.000162352	0.00169185
ENSG00000271992	RP11-42O15.3	7.18641	2.88273	0.764452	3.77098	0.000162608	0.00169315
ENSG00000248323	LUCAT1	30.9045	2.33006	0.618604	3.76665	0.000165456	0.0017214
ENSG00000007047	MARK4	164.152	0.624458	0.165932	3.76334	0.000167661	0.0017415
ENSG00000173575	CHD2	1126.76	0.498314	0.13242	3.76314	0.000167792	0.0017415
ENSG00000254338	RP11-909N17.3	33.8643	1.26817	0.337069	3.76234	0.000168334	0.00174537
ENSG00000163162	RNF149	461.083	0.384998	0.102334	3.76218	0.000168436	0.00174537
ENSG00000173531	MST1	406.475	0.557804	0.149013	3.74332	0.000181606	0.00187582
ENSG00000134086	VHL	222.91	0.55088	0.147306	3.7397	0.000184237	0.00189693
ENSG00000120063	GNA13	170.731	0.565333	0.151295	3.73663	0.000186501	0.00191564
ENSG00000106261	ZKSCAN1	708.683	0.523451	0.140108	3.73605	0.000186931	0.00191853
ENSG00000196531	NACA	2772.83	0.337982	0.0905212	3.73374	0.00018866	0.00193014
ENSG00000127481	UBR4	1121.08	0.531971	0.142495	3.73327	0.000189012	0.00193221
ENSG00000113621	TXNDC15	174.295	0.544395	0.145939	3.73028	0.000191264	0.00195213
ENSG00000173039	RELA	373.641	0.423384	0.113574	3.72783	0.000193134	0.00196966
ENSG00000070614	NDST1	295.577	0.577686	0.155003	3.72694	0.00019382	0.0019751
ENSG00000110090	CPT1A	1035.78	0.405244	0.10891	3.72089	0.00019852	0.00201661
ENSG00000215908	CROCCP2	242.026	0.573247	0.15415	3.71876	0.0002002	0.00203209
ENSG00000147403	RPL10	841.066	0.52357	0.140814	3.71816	0.000200678	0.00203374
ENSG00000115718	PROC	741.122	0.469764	0.126397	3.71658	0.000201934	0.00204342
ENSG00000167986	DDB1	1240.11	0.351738	0.0947035	3.71409	0.000203933	0.00206187
ENSG00000105372	RPS19	16491.6	0.28024	0.075591	3.70731	0.000209469	0.00210957
ENSG00000105993	DNAJB6	533.867	0.347778	0.0938401	3.70607	0.000210502	0.00211832
ENSG00000124226	RNF114	619.203	0.321701	0.0868149	3.7056	0.000210894	0.00212061
ENSG00000182827	ACBD3	485.208	0.399121	0.107724	3.70504	0.000211356	0.0021236
ENSG00000121644	DESI2	190.951	0.583504	0.157662	3.70099	0.000214761	0.00215278
ENSG00000006459	KDM7A	141.668	0.51565	0.139367	3.69995	0.000215639	0.00215823
ENSG00000159128	IFNGR2	209.837	0.472152	0.127635	3.69925	0.000216239	0.00216256
ENSG00000197971	MBP	146.783	0.525167	0.142292	3.69076	0.000223586	0.0022303
ENSG00000117614	SYF2	489.779	0.417278	0.1131	3.68945	0.000224743	0.00223886
ENSG00000235609	AF127936.7	36.063	0.906227	0.245831	3.68639	0.000227462	0.00226252
ENSG00000067560	RHOA	1683.13	0.245788	0.0668808	3.67502	0.000237835	0.00236206
ENSG00000170464	DNAJC18	38.8055	1.07139	0.291627	3.67385	0.000238927	0.00236743
ENSG00000103423	DNAJA3	218.39	0.543696	0.148101	3.67111	0.0002415	0.00238925
ENSG00000116604	MEF2D	59.3774	1.02799	0.280228	3.6684	0.000244069	0.00240729
ENSG00000174951	FUT1	1.68102	5.74416	1.56691	3.66591	0.000246465	0.00242907
ENSG00000100330	MTMR3	89.4561	0.760629	0.207518	3.66536	0.000246991	0.00243053
ENSG00000145685	LHFPL2	233.638	0.482067	0.131574	3.66384	0.00024846	0.00244312
ENSG00000138942	RNF185	57.7333	0.842927	0.23078	3.65251	0.000259689	0.00254385
ENSG00000128607	KLHDC10	222.839	0.425541	0.116559	3.65088	0.000261346	0.00255426
ENSG00000175155	YPEL2	60.1503	1.0301	0.282192	3.65036	0.000261878	0.00255752
ENSG00000101290	CDS2	459.299	0.377096	0.103343	3.64897	0.000263298	0.00256944
ENSG00000131051	RBM39	3280.24	0.294537	0.0807788	3.64621	0.000266134	0.00259516
ENSG00000137312	FLOT1	431.244	0.427195	0.117182	3.64558	0.000266792	0.00259961
ENSG00000116857	TMEM9	252.115	0.453725	0.124468	3.64532	0.000267055	0.00260021
ENSG00000183495	EP400	568.913	0.525717	0.144264	3.64412	0.000268304	0.0026104
ENSG00000164713	BRI3	563.858	0.336962	0.0925264	3.64179	0.000270748	0.00262823
ENSG00000130396	MLLT4	843.813	0.349845	0.0961093	3.64007	0.000272563	0.0026419
ENSG00000107263	RAPGEF1	432.299	0.360412	0.0990124	3.64007	0.000272566	0.0026419
ENSG00000170471	RALGAPB	238.388	0.442393	0.121718	3.63458	0.000278431	0.00269268
ENSG00000171606	ZNF274	67.1476	0.858843	0.236364	3.63357	0.00027953	0.00270128
ENSG00000153291	SLC25A27	23.0998	1.4347	0.394913	3.63295	0.0002802	0.00270574
ENSG00000141682	PMAIP1	37.7226	1.16127	0.320026	3.62868	0.000284875	0.00274882
ENSG00000231500	RPS18	4694.4	0.343047	0.0945462	3.62835	0.000285233	0.00275022
ENSG00000164849	GPR146	24.1901	1.485	0.409345	3.62774	0.000285912	0.0027506
ENSG00000170608	FOXA3	51.8889	0.724058	0.199768	3.6245	0.000289521	0.0027791
ENSG00000144445	KANSL1L	28.7769	1.18904	0.328202	3.6229	0.000291322	0.00279016
ENSG00000040531	CTNS	118.506	0.664364	0.183652	3.61752	0.000297443	0.00284035
ENSG00000107864	CPEB3	24.8806	1.24667	0.344699	3.61669	0.000298393	0.00284401
ENSG00000257923	CUX1	485.075	0.424881	0.11748	3.61661	0.000298488	0.00284401
ENSG00000144233	AMMECR1L	248.515	0.454756	0.125776	3.61561	0.000299645	0.00285293
ENSG00000100246	DNAL4	73.0297	0.655606	0.181511	3.61195	0.000303908	0.00289138
ENSG00000224870	RP4-758J18.2	112.028	0.577295	0.159933	3.6096	0.000306673	0.00291554
ENSG00000197530	MIB2	90.0887	0.712769	0.197663	3.60597	0.000310984	0.00294567
ENSG00000198408	MGEA5	407.988	0.519081	0.143989	3.605	0.000312148	0.00295453
ENSG00000169018	FEM1B	128.604	0.54238	0.150482	3.60429	0.00031301	0.00296051
ENSG00000012504	NR1H4	171.226	0.457288	0.126888	3.60388	0.000313498	0.00296295
ENSG00000160570	DEDD2	223.963	0.563355	0.156391	3.60223	0.000315503	0.00297973
ENSG00000147649	MTDH	8657.98	0.343698	0.0954549	3.60063	0.000317446	0.00299503
ENSG00000107643	MAPK8	101.14	0.642557	0.178487	3.60002	0.00031819	0.00299852
ENSG00000112306	RPS12	20818	0.369406	0.102784	3.59402	0.000325617	0.00306489
ENSG00000115944	COX7A2L	565.997	0.40022	0.111364	3.59381	0.000325873	0.00306489
ENSG00000159592	GPBP1L1	357.871	0.436042	0.121346	3.59338	0.000326416	0.00306489
ENSG00000008405	CRY1	124.687	0.586683	0.163281	3.59308	0.000326798	0.00306489
ENSG00000134780	DAGLA	129.939	0.794069	0.221005	3.593	0.000326896	0.00306489
ENSG00000136770	DNAJC1	555.827	0.323421	0.0900371	3.59209	0.000328038	0.00307336
ENSG00000151715	TMEM45B	334.087	0.372554	0.103752	3.5908	0.000329661	0.00308498
ENSG00000163113	OTUD7B	157.417	0.564019	0.157099	3.59022	0.000330393	0.0030887
ENSG00000047849	MAP4	806.488	0.31501	0.0877763	3.58878	0.000332223	0.00310355
ENSG00000068438	FTSJ1	143.925	0.479536	0.133745	3.58545	0.000336498	0.00313531
ENSG00000272502	RP11-713M15.2	311.635	0.529133	0.147589	3.58519	0.000336837	0.00313531
ENSG00000178623	GPR35	97.5979	0.573903	0.160119	3.58424	0.000338068	0.00314181
ENSG00000198863	RUNDC1	143.323	0.605194	0.168856	3.58408	0.000338266	0.00314181
ENSG00000101236	RNF24	128.892	0.650402	0.181656	3.58042	0.000343048	0.00317707
ENSG00000104946	TBC1D17	74.2285	0.756047	0.211268	3.57862	0.000345415	0.00319441
ENSG00000140988	RPS2	5256.76	0.390838	0.109273	3.57672	0.000347934	0.0032131
ENSG00000133460	SLC2A11	139.509	0.552415	0.154514	3.57518	0.000349992	0.00322979
ENSG00000159674	SPON2	109.761	0.583416	0.163423	3.56998	0.000357008	0.00328669
ENSG00000160202	CRYAA	1231.19	0.42006	0.117724	3.56817	0.000359479	0.00330316
ENSG00000253196	RP11-706C16.7	14.6594	1.43185	0.401891	3.56277	0.000366967	0.00336441
ENSG00000174373	RALGAPA1	139.878	0.546956	0.153521	3.56274	0.000367003	0.00336441
ENSG00000125637	PSD4	196.158	0.45145	0.126719	3.56261	0.000367188	0.00336441
ENSG00000089248	ERP29	1294.48	0.41196	0.115759	3.55878	0.000372582	0.00341142
ENSG00000171311	EXOSC1	184.039	0.472796	0.132914	3.55715	0.000374906	0.00342783
ENSG00000151893	CACUL1	699.02	0.319211	0.0897442	3.5569	0.000375263	0.00342866
ENSG00000124882	EREG	1207.49	0.614143	0.172755	3.555	0.000377977	0.00344857
ENSG00000173273	TNKS	186.558	0.473862	0.133369	3.55301	0.000380847	0.00347128
ENSG00000051108	HERPUD1	790.152	0.800287	0.225249	3.5529	0.000381004	0.00347128
ENSG00000141027	NCOR1	1115.89	0.250608	0.0705903	3.55017	0.000384981	0.00350256
ENSG00000100129	EIF3L	1128.44	0.420085	0.118356	3.54933	0.000386214	0.00351131
ENSG00000233927	RPS28	1271.93	0.285611	0.0805593	3.54536	0.000392081	0.00356214
ENSG00000162889	MAPKAPK2	478.483	0.379424	0.107039	3.54471	0.000393044	0.00356837
ENSG00000177156	TALDO1	1523.61	0.32432	0.0915095	3.54411	0.000393942	0.00357401
ENSG00000175309	PHYKPL	52.9317	0.826064	0.233154	3.543	0.000395599	0.00358652
ENSG00000215717	TMEM167B	108.676	0.67974	0.192038	3.53961	0.00040072	0.00362583
ENSG00000240230	COX19	464.131	0.511055	0.144473	3.53739	0.00040411	0.00365341
ENSG00000140688	C16orf58	157.437	0.522815	0.147821	3.5368	0.000405	0.00365889
ENSG00000168297	PXK	29.9867	1.03699	0.29389	3.52849	0.000417932	0.00375731
ENSG00000141576	RNF157	266.405	0.421567	0.119516	3.52728	0.000419859	0.00377201
ENSG00000117448	AKR1A1	472.451	0.338609	0.0960109	3.52677	0.000420657	0.00377655
ENSG00000162695	SLC30A7	343.437	0.433808	0.123035	3.52589	0.000422056	0.00378384
ENSG00000119979	FAM45A	76.9656	0.674156	0.191507	3.52026	0.000431119	0.00385695
ENSG00000113889	KNG1	10.5475	1.82659	0.518904	3.52009	0.000431407	0.00385695
ENSG00000101194	SLC17A9	1364.96	0.425372	0.121027	3.51468	0.000440285	0.00392816
ENSG00000166946	CCNDBP1	80.343	0.82595	0.23504	3.51408	0.000441272	0.00393424
ENSG00000132024	CC2D1A	113.498	0.746012	0.212317	3.51367	0.000441968	0.00393773
ENSG00000197157	SND1	978.19	0.389008	0.110793	3.51113	0.000446204	0.00396452
ENSG00000160145	KALRN	58.0974	0.659956	0.187993	3.51054	0.0004472	0.00397063
ENSG00000175489	LRRC25	48.0799	0.932228	0.26563	3.5095	0.000448955	0.00398347
ENSG00000134508	CABLES1	181.312	0.41526	0.118403	3.50718	0.000452881	0.00401279
ENSG00000179134	SAMD4B	1039.81	0.409917	0.116974	3.50435	0.000457715	0.00405284
ENSG00000185222	WBP5	408.579	0.358609	0.102446	3.50045	0.000464471	0.00410983
ENSG00000105404	RABAC1	102.846	0.639287	0.182648	3.5001	0.000465092	0.00411251
ENSG00000108961	RANGRF	164.109	0.474976	0.135711	3.4999	0.000465441	0.00411278
ENSG00000131507	NDFIP1	302.512	0.304981	0.0872374	3.49599	0.000472312	0.00416778
ENSG00000198355	PIM3	869.169	0.330319	0.0945359	3.49411	0.000475648	0.00418863
ENSG00000166173	LARP6	43.7002	1.19842	0.343089	3.49304	0.000477551	0.00420252
ENSG00000115520	COQ10B	181.149	0.541787	0.155134	3.49237	0.000478753	0.00421022
ENSG00000092108	SCFD1	495.054	0.319535	0.0916267	3.48736	0.000487813	0.00426953
ENSG00000132386	SERPINF1	1993.28	0.309213	0.0888709	3.47935	0.00050263	0.0043873
ENSG00000163818	LZTFL1	55.4504	0.887318	0.255061	3.47884	0.000503583	0.00438967
ENSG00000148396	SEC16A	377.155	0.502699	0.144553	3.47762	0.000505886	0.00440678
ENSG00000117385	LEPRE1	144.233	0.684124	0.196796	3.4763	0.000508382	0.00442553
ENSG00000113272	THG1L	156.936	0.617677	0.177703	3.4759	0.000509143	0.00442916
ENSG00000155229	MMS19	595.125	0.464227	0.133768	3.47038	0.000519726	0.00450907
ENSG00000197355	UAP1L1	138.572	0.564064	0.162609	3.46883	0.000522724	0.00452899
ENSG00000198961	PJA2	211.79	0.410992	0.118492	3.46853	0.000523323	0.00453109
ENSG00000187801	ZFP69B	25.0567	1.08823	0.313772	3.46821	0.000523941	0.00453109
ENSG00000108349	CASC3	517.446	0.329599	0.0950426	3.46791	0.000524521	0.00453238
ENSG00000100399	CHADL	10.1125	1.78071	0.513536	3.46755	0.000525222	0.0045354
ENSG00000189221	MAOA	56.2129	0.761575	0.219921	3.46294	0.000534301	0.00460148
ENSG00000104763	ASAH1	331.372	0.355119	0.102667	3.45893	0.000542318	0.00465809
ENSG00000106701	FSD1L	44.7358	0.932318	0.269805	3.45552	0.000549228	0.00470803
ENSG00000196305	IARS	395.894	0.905482	0.262419	3.45052	0.000559518	0.00478669
ENSG00000177951	BET1L	187.603	0.455959	0.132193	3.44918	0.000562295	0.00480727
ENSG00000136830	FAM129B	508.688	0.285203	0.0827533	3.44642	0.000568072	0.00485344
ENSG00000130827	PLXNA3	127.339	0.806047	0.234065	3.44369	0.000573834	0.00489652
ENSG00000142676	RPL11	6119.08	0.245126	0.0711816	3.44367	0.000573873	0.00489652
ENSG00000129245	FXR2	232.517	0.58355	0.169551	3.44174	0.000577985	0.00491859
ENSG00000069399	BCL3	152.967	0.523525	0.152265	3.43825	0.000585485	0.00496931
ENSG00000158874	APOA2	10743.6	0.25242	0.0734358	3.43729	0.000587576	0.00498377
ENSG00000082996	RNF13	121.844	0.543142	0.158259	3.43197	0.000599204	0.0050724
ENSG00000120616	EPC1	352.167	0.409144	0.119244	3.43115	0.000601026	0.00508448
ENSG00000158195	WASF2	862.157	0.329998	0.0962479	3.42862	0.000606648	0.00512868
ENSG00000169967	MAP3K2	619.841	0.33859	0.0987791	3.42774	0.000608621	0.00514199
ENSG00000141756	FKBP10	335.757	0.51654	0.150807	3.42517	0.000614425	0.00518006
ENSG00000144468	RHBDD1	42.3393	0.943126	0.275658	3.42137	0.000623073	0.00524429
ENSG00000135506	OS9	770.663	0.294844	0.0861827	3.42115	0.000623575	0.00524429
ENSG00000135919	SERPINE2	100.887	0.866362	0.253362	3.41946	0.000627451	0.00526693
ENSG00000106346	USP42	346.37	0.407581	0.119195	3.41944	0.000627492	0.00526693
ENSG00000168137	SETD5	1109.65	0.451763	0.132138	3.41887	0.000628813	0.00527458
ENSG00000116406	EDEM3	153.332	0.467273	0.136741	3.4172	0.000632676	0.00530355
ENSG00000100934	SEC23A	459.119	0.392022	0.114771	3.4157	0.000636183	0.00532941
ENSG00000107341	UBE2R2	1139.19	0.249964	0.073248	3.41257	0.000643533	0.00538406
ENSG00000266538	RP11-385D13.3	26.6161	1.50774	0.441877	3.41213	0.000644567	0.00538922
ENSG00000099341	PSMD8	884.432	0.293918	0.0861737	3.41076	0.000647829	0.00540597
ENSG00000269190	FBXO17	125.917	0.563881	0.165446	3.40824	0.000653839	0.00543886
ENSG00000079332	SAR1A	600.331	0.29638	0.0869602	3.40822	0.000653878	0.00543886
ENSG00000198650	TAT	12.7027	1.30351	0.382732	3.40581	0.000659679	0.00547539
ENSG00000188760	TMEM198	63.6527	0.68078	0.199984	3.40418	0.000663637	0.00549762
ENSG00000127526	SLC35E1	438.131	0.327479	0.0962024	3.40406	0.000663925	0.00549762
ENSG00000143947	RPS27A	33369.1	0.39203	0.115245	3.40172	0.000669629	0.00553609
ENSG00000137936	BCAR3	40.0641	0.85162	0.250612	3.39816	0.0006784	0.00559593
ENSG00000144136	SLC20A1	1345.02	0.241229	0.071068	3.39434	0.000687932	0.00566731
ENSG00000115306	SPTBN1	5506.21	0.31105	0.0916998	3.39205	0.000693717	0.00571132
ENSG00000062598	ELMO2	137.957	0.473561	0.139868	3.38576	0.000709809	0.00583264
ENSG00000183172	SMDT1	191.94	0.432388	0.127778	3.3839	0.000714642	0.00586862
ENSG00000204463	BAG6	395.615	0.303323	0.0896464	3.38355	0.000715552	0.00587235
ENSG00000084636	COL16A1	135.248	0.695633	0.205673	3.38223	0.000719009	0.00589689
ENSG00000084092	NOA1	151.129	0.512253	0.151462	3.38206	0.000719457	0.00589689
ENSG00000139668	WDFY2	142.182	0.451595	0.133734	3.37683	0.000733272	0.0060025
ENSG00000141458	NPC1	421.498	0.321587	0.0953621	3.37228	0.000745497	0.0060987
ENSG00000072778	ACADVL	901.095	0.420142	0.124729	3.36844	0.000755949	0.00616933
ENSG00000143891	GALM	597.138	0.314453	0.0933654	3.36798	0.00075721	0.00617495
ENSG00000167711	SERPINF2	836.803	0.414915	0.123241	3.36671	0.000760715	0.00619961
ENSG00000145506	NKD2	1.71366	4.80673	1.42946	3.36262	0.000772072	0.00628583
ENSG00000197568	HHLA3	10.0502	1.45566	0.433683	3.35651	0.000789339	0.00641668
ENSG00000196428	TSC22D2	125.935	0.482349	0.143793	3.35446	0.000795209	0.00645626
ENSG00000172482	AGXT	61.6011	0.729947	0.217683	3.35325	0.000798677	0.00647626
ENSG00000101940	WDR13	66.2969	0.726769	0.216766	3.35278	0.00080003	0.00648316
ENSG00000172183	ISG20	36.0074	0.78064	0.232927	3.35144	0.000803925	0.00651049
ENSG00000155975	VPS37A	127.087	0.565186	0.168648	3.35127	0.000804413	0.00651049
ENSG00000110436	SLC1A2	10.1195	2.05177	0.612595	3.34931	0.000810128	0.00654443
ENSG00000089351	GRAMD1A	127.306	0.495464	0.148038	3.34686	0.000817326	0.00659839
ENSG00000243335	KCTD7	97.3271	0.663297	0.198832	3.33596	0.000850043	0.00683691
ENSG00000099949	LZTR1	173.132	0.506989	0.152037	3.33464	0.000854097	0.00686096
ENSG00000065000	AP3D1	3135.08	0.294072	0.0881986	3.3342	0.00085544	0.00686747
ENSG00000141480	ARRB2	927.473	0.400062	0.120116	3.33063	0.000866493	0.00694324
ENSG00000171425	ZNF581	115.398	0.526741	0.158462	3.32408	0.000887103	0.00709958
ENSG00000242247	ARFGAP3	323.267	0.451269	0.135957	3.31921	0.000902722	0.00721563
ENSG00000214655	ZSWIM8	206.071	0.602203	0.181649	3.3152	0.000915787	0.00729294
ENSG00000160584	SIK3	119.432	0.771818	0.233101	3.31109	0.000929349	0.00738271
ENSG00000115317	HTRA2	182.801	0.40429	0.122269	3.30657	0.000944446	0.00749803
ENSG00000125730	C3	3517.33	0.333628	0.100964	3.30443	0.000951696	0.00754166
ENSG00000144567	FAM134A	448.415	0.345342	0.104531	3.30374	0.000954037	0.00755558
ENSG00000255529	POLR2M	170.306	0.429401	0.129997	3.30316	0.000956011	0.00756656
ENSG00000143515	ATP8B2	67.8614	0.601136	0.182021	3.30256	0.000958061	0.00757814
ENSG00000136021	SCYL2	423.877	0.349011	0.105693	3.3021	0.000959627	0.00758246
ENSG00000171169	NAIF1	33.3659	0.81287	0.246395	3.29904	0.000970145	0.00765964
ENSG00000075399	VPS9D1	41.2232	0.834575	0.253213	3.29594	0.000980943	0.00773542
ENSG00000104976	SNAPC2	122.243	0.52006	0.157831	3.29504	0.000984079	0.00775067
ENSG00000099840	IZUMO4	2.38898	4.24166	1.28759	3.29426	0.000986815	0.00776748
ENSG00000129493	HEATR5A	172.209	0.422914	0.128631	3.2878	0.00100973	0.00793332
ENSG00000176531	PHLDB3	32.2328	1.05143	0.320038	3.28531	0.00101869	0.00798651
ENSG00000169251	NMD3	234.15	0.387287	0.117909	3.28464	0.00102113	0.00799166
ENSG00000148842	CNNM2	105.794	0.656125	0.199814	3.28369	0.00102458	0.00800916
ENSG00000103257	SLC7A5	1463.84	0.383205	0.116703	3.28358	0.00102497	0.00800916
ENSG00000225190	PLEKHM1	45.0818	0.852152	0.259666	3.28172	0.00103176	0.00805246
ENSG00000125107	CNOT1	749.594	0.359251	0.109586	3.27824	0.00104455	0.0081326
ENSG00000197756	RPL37A	34575.3	0.342219	0.104498	3.27489	0.00105704	0.00821496
ENSG00000157349	DDX19B	130.369	0.497237	0.151866	3.27418	0.00105971	0.00823076
ENSG00000064393	HIPK2	759.49	0.327046	0.0999662	3.27156	0.00106954	0.00829215
ENSG00000172943	PHF8	84.4598	0.678527	0.207508	3.26989	0.0010759	0.00833144
ENSG00000087152	ATXN7L3	285.778	0.315994	0.0966427	3.26971	0.00107656	0.00833157
ENSG00000136856	SLC2A8	2571.26	0.460251	0.140775	3.26941	0.00107773	0.00833561
ENSG00000101152	DNAJC5	695.127	0.320166	0.0979469	3.26877	0.00108015	0.00834931
ENSG00000099622	CIRBP	705.308	0.385448	0.118034	3.26556	0.00109247	0.00842936
ENSG00000197265	GTF2E2	287.325	0.357527	0.109566	3.26314	0.00110187	0.00849176
ENSG00000143727	ACP1	742.11	0.27922	0.0855828	3.26257	0.00110408	0.00849862
ENSG00000166579	NDEL1	306.841	0.412579	0.126475	3.26213	0.00110577	0.00850656
ENSG00000122674	CCZ1	76.061	0.578443	0.17747	3.25938	0.00111655	0.00857931
ENSG00000198399	ITSN2	941.027	0.279291	0.0857697	3.25629	0.00112879	0.00866302
ENSG00000166401	SERPINB8	51.6058	1.23358	0.379059	3.25433	0.0011366	0.00871255
ENSG00000100225	FBXO7	440.334	0.2928	0.0900934	3.24996	0.00115421	0.00883708
ENSG00000165006	UBAP1	190.178	0.530529	0.163592	3.243	0.00118277	0.00905034
ENSG00000188026	RILPL1	19.5798	1.10449	0.340622	3.24255	0.00118464	0.00905928
ENSG00000213923	CSNK1E	608.223	0.354932	0.10962	3.23784	0.00120438	0.0091838
ENSG00000147050	KDM6A	84.6968	0.654147	0.202402	3.23192	0.00122963	0.00935894
ENSG00000138709	LARP1B	782.885	0.319028	0.0989735	3.22337	0.00126694	0.00960326
ENSG00000145592	RPL37	8071.28	0.320304	0.0994998	3.21914	0.00128574	0.00971157
ENSG00000189227	C15orf61	166.763	0.449122	0.139552	3.21833	0.00128941	0.0097293
ENSG00000107771	CCSER2	149.106	0.449753	0.139752	3.21821	0.00128992	0.0097293
ENSG00000113924	HGD	495.47	0.300273	0.0933069	3.21812	0.00129035	0.0097293
ENSG00000143862	ARL8A	172.48	0.643849	0.200259	3.21508	0.0013041	0.00981571
ENSG00000171903	CYP4F11	113.33	0.618848	0.192654	3.21223	0.0013171	0.00990781
ENSG00000133703	KRAS	333.017	0.319977	0.0996553	3.21084	0.00132349	0.00994428
ENSG00000124253	PCK1	9.01801	1.84523	0.57524	3.20775	0.00133777	0.0100341
ENSG00000164610	RP9	233.667	0.475777	0.148582	3.20211	0.00136423	0.0102147
ENSG00000126934	MAP2K2	891.664	0.368271	0.115141	3.19843	0.00138177	0.010334
ENSG00000070770	CSNK2A2	726.237	0.275115	0.0861025	3.1952	0.00139733	0.0104383
ENSG00000176170	SPHK1	337.701	0.353396	0.110637	3.19419	0.00140224	0.0104689
ENSG00000185033	SEMA4B	62.8562	0.729417	0.228443	3.193	0.00140804	0.0105062
ENSG00000108829	LRRC59	962.845	0.241629	0.075722	3.19101	0.00141777	0.0105665
ENSG00000175764	TTLL11	15.7141	1.50073	0.470386	3.19043	0.00142061	0.0105815
ENSG00000184428	TOP1MT	169.099	0.452631	0.142004	3.18746	0.00143528	0.0106846
ENSG00000100625	SIX4	25.4694	0.887812	0.278599	3.18671	0.00143903	0.0107064
ENSG00000164741	DLC1	466.958	0.340958	0.107015	3.18609	0.0014421	0.0107141
ENSG00000130818	ZNF426	35.0806	0.920725	0.288991	3.186	0.00144255	0.0107141
ENSG00000169957	ZNF768	60.2446	0.741439	0.232771	3.18527	0.00144619	0.0107349
ENSG00000075426	FOSL2	94.7239	0.616208	0.193484	3.1848	0.00144854	0.0107403
ENSG00000171206	TRIM8	106.695	0.538159	0.168978	3.18479	0.00144858	0.0107403
ENSG00000265778	RP11-17M16.2	4.93358	2.28675	0.718528	3.18255	0.00145985	0.0108176
ENSG00000160991	ORAI2	69.2169	0.62417	0.196278	3.18003	0.00147262	0.0108997
ENSG00000008300	CELSR3	52.1926	0.757412	0.238326	3.17805	0.00148269	0.0109554
ENSG00000127511	SIN3B	217.281	0.490816	0.154694	3.17281	0.00150969	0.0111104
ENSG00000037042	TUBG2	207.072	0.548963	0.173058	3.17212	0.00151328	0.0111305
ENSG00000063438	AHRR	19.8133	1.16119	0.367213	3.16217	0.00156597	0.0114787
ENSG00000171119	NRTN	18.8141	1.18655	0.375666	3.15851	0.00158577	0.011591
ENSG00000204231	RXRB	103.078	0.513267	0.162527	3.15804	0.00158831	0.0116029
ENSG00000092871	RFFL	282.238	0.394119	0.124885	3.15584	0.00160034	0.0116842
ENSG00000116977	LGALS8	337.67	0.360565	0.114271	3.15535	0.00160303	0.0116973
ENSG00000133706	LARS	507.06	0.282886	0.0896735	3.15462	0.00160707	0.0117201
ENSG00000117862	TXNDC12	539.866	0.281867	0.0895258	3.14844	0.00164142	0.0119234
ENSG00000075975	MKRN2	122.342	0.631927	0.200768	3.14754	0.00164648	0.0119467
ENSG00000272669	RP3-508I15.21	33.8269	1.05698	0.335864	3.14705	0.00164928	0.0119603
ENSG00000148180	GSN	320.37	0.291369	0.0926316	3.14546	0.00165824	0.0120118
ENSG00000107140	TESK1	43.553	0.804393	0.255916	3.14319	0.00167118	0.0120852
ENSG00000068697	LAPTM4A	5322.13	0.220095	0.0700344	3.14268	0.0016741	0.0120995
ENSG00000130734	ATG4D	82.0754	0.614135	0.195591	3.13989	0.00169012	0.0121948
ENSG00000130066	SAT1	2919.84	0.215285	0.0685979	3.13836	0.00169898	0.0122519
ENSG00000163608	C3orf17	173.475	0.430124	0.137082	3.1377	0.00170276	0.0122723
ENSG00000023902	PLEKHO1	161.385	0.491823	0.156862	3.13539	0.00171627	0.012342
ENSG00000119414	PPP6C	322.306	0.341684	0.109042	3.13352	0.00172725	0.0124072
ENSG00000204256	BRD2	869.433	0.365408	0.116662	3.13219	0.00173508	0.0124565
ENSG00000257605	RP11-680A11.5	14.2031	1.73084	0.552628	3.13202	0.0017361	0.0124568
ENSG00000130522	JUND	590.412	0.437022	0.139562	3.13139	0.00173979	0.0124695
ENSG00000186395	KRT10	282.94	0.476737	0.152443	3.12731	0.00176415	0.012637
ENSG00000204084	INPP5B	62.3543	0.63626	0.203541	3.12596	0.00177227	0.0126741
ENSG00000120699	EXOSC8	329.931	0.368584	0.118142	3.11983	0.00180955	0.0129134
ENSG00000100614	PPM1A	149.068	0.474235	0.152008	3.1198	0.00180974	0.0129134
ENSG00000204086	RPA4	2.12744	4.02226	1.28991	3.11824	0.00181933	0.0129627
ENSG00000179979	CRIPAK	41.6824	0.957302	0.307006	3.11819	0.00181966	0.0129627
ENSG00000132824	SERINC3	832.473	0.313477	0.100775	3.11065	0.00186673	0.0132323
ENSG00000131018	SYNE1	104.858	0.668396	0.214931	3.10982	0.00187201	0.0132551
ENSG00000135677	GNS	319.9	0.333539	0.107316	3.10801	0.00188352	0.0133136
ENSG00000149531	FRG1B	120.847	0.517673	0.166634	3.10665	0.00189222	0.0133615
ENSG00000068137	PLEKHH3	86.6446	0.559187	0.18001	3.10643	0.00189363	0.0133641
ENSG00000103042	SLC38A7	145.891	0.473483	0.152523	3.10435	0.00190699	0.013449
ENSG00000153815	CMIP	859.043	0.294865	0.0949931	3.10407	0.00190878	0.013449
ENSG00000148468	FAM171A1	274.866	0.341683	0.110087	3.10376	0.00191076	0.0134557
ENSG00000104529	EEF1D	2223.83	0.384306	0.123835	3.10337	0.00191331	0.0134619
ENSG00000130733	YIPF2	99.8141	0.62397	0.201071	3.10324	0.00191416	0.0134619
ENSG00000100532	CGRRF1	40.0673	0.908446	0.293123	3.0992	0.00194045	0.0136201
ENSG00000131446	MGAT1	300.378	0.327838	0.105788	3.09901	0.00194171	0.0136215
ENSG00000141985	SH3GL1	819.039	0.302946	0.0978505	3.09601	0.00196144	0.0137285
ENSG00000012822	CALCOCO1	12.5135	1.62292	0.524533	3.09404	0.00197453	0.0138067
ENSG00000171988	JMJD1C	664.537	0.321765	0.104044	3.09259	0.00198418	0.0138667
ENSG00000167302	ENTHD2	294.097	0.498898	0.161458	3.08995	0.00200188	0.0139828
ENSG00000204160	ZDHHC18	182.409	0.45368	0.147093	3.08432	0.0020402	0.0141844
ENSG00000213523	SRA1	138.162	0.47421	0.153752	3.08425	0.00204063	0.0141844
ENSG00000179151	EDC3	104.267	0.467802	0.15172	3.08333	0.00204698	0.0142126
ENSG00000146278	PNRC1	157.918	1.08016	0.350332	3.08326	0.00204747	0.0142126
ENSG00000167792	NDUFV1	323.961	0.402736	0.130624	3.08318	0.00204799	0.0142126
ENSG00000172037	LAMB2	219.54	0.369975	0.120011	3.08284	0.00205033	0.0142211
ENSG00000149527	PLCH2	31.7498	1.3406	0.435134	3.0809	0.00206379	0.0142872
ENSG00000109572	CLCN3	272.522	0.397295	0.129047	3.07869	0.00207912	0.0143744
ENSG00000163347	CLDN1	601.078	0.249088	0.0809358	3.0776	0.00208675	0.0144117
ENSG00000075785	RAB7A	1035.48	0.30011	0.0975194	3.07744	0.00208787	0.0144118
ENSG00000111711	GOLT1B	234.183	0.453489	0.147415	3.07628	0.002096	0.0144447
ENSG00000102103	PQBP1	202.327	0.46759	0.152115	3.07392	0.00211268	0.0145441
ENSG00000163512	AZI2	246.076	0.418017	0.136029	3.073	0.00211915	0.0145809
ENSG00000075407	ZNF37A	333.037	0.453662	0.147663	3.07227	0.00212434	0.0146088
ENSG00000135596	MICAL1	65.6754	0.69207	0.225615	3.06748	0.00215869	0.0148135
ENSG00000104805	NUCB1	796.438	0.361389	0.118061	3.06104	0.00220572	0.0151171
ENSG00000140479	PCSK6	169.564	0.420484	0.137375	3.06085	0.00220711	0.0151171
ENSG00000188177	ZC3H6	31.1694	0.889626	0.290681	3.06049	0.00220978	0.0151189
ENSG00000104643	MTMR9	131.535	0.452619	0.147922	3.05986	0.00221443	0.0151315
ENSG00000168140	VASN	65.7539	0.830231	0.271362	3.05949	0.00221712	0.0151419
ENSG00000110700	RPS13	3884.9	0.238991	0.0781588	3.05776	0.00223001	0.0152219
ENSG00000010322	NISCH	90.2269	0.606246	0.198603	3.05255	0.00226908	0.0154477
ENSG00000155463	OXA1L	450.83	0.276223	0.0905238	3.05139	0.00227786	0.0154911
ENSG00000188522	FAM83G	204.098	0.453104	0.148515	3.05091	0.00228152	0.0155078
ENSG00000102786	INTS6	113.48	0.464428	0.152327	3.04888	0.00229698	0.0156047
ENSG00000092203	TOX4	493.776	0.322943	0.106047	3.04528	0.00232465	0.0157595
ENSG00000136932	C9orf156	86.5945	0.625116	0.205513	3.04174	0.00235217	0.0159377
ENSG00000122507	BBS9	19.0607	1.00566	0.330853	3.03959	0.00236897	0.0160431
ENSG00000178761	FAM219B	78.8961	0.761953	0.251059	3.03495	0.00240572	0.0162664
ENSG00000147883	CDKN2B	8.51408	2.74074	0.90324	3.03435	0.00241058	0.0162907
ENSG00000114861	FOXP1	712.343	0.31274	0.103119	3.0328	0.00242293	0.016357
ENSG00000112977	DAP	212.479	0.376756	0.12434	3.03005	0.00244509	0.0164807
ENSG00000156860	FBRS	412.226	0.470081	0.155252	3.02787	0.00246287	0.0165746
ENSG00000115548	KDM3A	179.544	0.499887	0.165135	3.02714	0.00246878	0.0166057
ENSG00000164970	FAM219A	429.33	0.502041	0.166018	3.02401	0.00249451	0.01677
ENSG00000090615	GOLGA3	462.404	0.382232	0.126429	3.02328	0.00250047	0.0168013
ENSG00000188352	FOCAD	117.099	0.395404	0.130797	3.02303	0.00250256	0.0168066
ENSG00000273142	RP11-458F8.4	30.0649	1.07186	0.354707	3.02182	0.00251257	0.0168555
ENSG00000198756	COLGALT2	58.4712	0.557039	0.184356	3.02154	0.00251495	0.0168555
ENSG00000127663	KDM4B	273.014	0.441745	0.1462	3.02152	0.00251507	0.0168555
ENSG00000141698	NT5C3B	245.505	0.375227	0.124332	3.01794	0.00254499	0.0170207
ENSG00000111897	SERINC1	761.026	0.422322	0.140052	3.01548	0.00256575	0.0171418
ENSG00000169122	FAM110B	35.1738	0.766202	0.254441	3.01131	0.00260121	0.0173248
ENSG00000101745	ANKRD12	1208.25	0.438602	0.145718	3.00994	0.00261295	0.0173851
ENSG00000027847	B4GALT7	113.666	0.528378	0.175602	3.00894	0.00262159	0.0174336
ENSG00000167182	SP2	79.7343	0.565478	0.188046	3.00712	0.00263737	0.0175025
ENSG00000130208	APOC1	3332.37	0.427305	0.142164	3.00571	0.00264958	0.0175654
ENSG00000165526	RPUSD4	452.986	0.328134	0.109266	3.00307	0.00267273	0.017687
ENSG00000114739	ACVR2B	120.969	0.466642	0.15545	3.00188	0.00268317	0.0177415
ENSG00000198925	ATG9A	462.725	0.321399	0.107107	3.00073	0.00269334	0.0177824
ENSG00000144659	SLC25A38	199.955	0.413271	0.137768	2.99976	0.00270192	0.0178115
ENSG00000135597	REPS1	169.398	0.427109	0.142428	2.99877	0.00271073	0.0178424
ENSG00000141380	SS18	44.2932	0.820595	0.2737	2.99816	0.00271618	0.0178601
ENSG00000229314	ORM1	703.463	0.356138	0.118806	2.99763	0.00272085	0.0178816
ENSG00000068912	ERLEC1	529.71	0.273605	0.0913069	2.99654	0.00273064	0.0179368
ENSG00000081181	ARG2	59.3805	0.762835	0.254622	2.99595	0.00273596	0.017943
ENSG00000134363	FST	93.4247	0.584528	0.19511	2.99589	0.00273649	0.017943
ENSG00000177600	RPLP2	5512.77	0.246704	0.0824269	2.993	0.0027625	0.0180908
ENSG00000110046	ATG2A	122.739	0.555708	0.18581	2.99073	0.00278312	0.0182074
ENSG00000198171	DDRGK1	935.238	0.274261	0.0917553	2.98904	0.00279854	0.0182898
ENSG00000145425	RPS3A	1310.4	0.362388	0.12132	2.98704	0.00281688	0.0183817
ENSG00000115464	USP34	1307.31	0.261816	0.0876558	2.98687	0.00281851	0.018383
ENSG00000186141	POLR3C	68.2209	0.684341	0.229181	2.98603	0.00282624	0.0184241
ENSG00000251022	THAP9-AS1	58.9633	0.70941	0.237794	2.9833	0.00285157	0.0185705
ENSG00000172273	HINFP	50.9654	0.6772	0.227154	2.98123	0.00287091	0.018687
ENSG00000184863	RBM33	370.239	0.377299	0.126601	2.98023	0.00288036	0.018739
ENSG00000138764	CCNG2	32.4018	1.11446	0.374643	2.97471	0.00293266	0.0190126
ENSG00000168268	NT5DC2	493.553	0.417036	0.140201	2.97455	0.00293419	0.0190126
ENSG00000110330	BIRC2	466.504	0.290208	0.0976118	2.97308	0.00294823	0.019094
ENSG00000182054	IDH2	454.996	0.251758	0.0847249	2.97148	0.00296369	0.0191845
ENSG00000146833	TRIM4	283.284	0.453558	0.152692	2.97041	0.00297406	0.0192419
ENSG00000196652	ZKSCAN5	133.198	0.430708	0.14527	2.96488	0.00302801	0.0195322
ENSG00000116786	PLEKHM2	177.667	0.428947	0.144707	2.96426	0.00303416	0.0195523
ENSG00000260054	RP11-611L7.1	263.449	0.445194	0.150264	2.96274	0.00304915	0.0196391
ENSG00000168301	KCTD6	14.7644	1.1062	0.373601	2.96091	0.00306728	0.0197263
ENSG00000042493	CAPG	25.8426	1.04383	0.352604	2.96033	0.00307306	0.0197438
ENSG00000172057	ORMDL3	501.873	0.327395	0.110675	2.95818	0.00309466	0.0198344
ENSG00000161970	RPL26	10797.6	0.334712	0.113163	2.95778	0.0030986	0.0198344
ENSG00000100241	SBF1	645.404	0.499024	0.16872	2.9577	0.00309946	0.0198344
ENSG00000100949	RABGGTA	110.186	0.422553	0.142973	2.95547	0.00312195	0.019933
ENSG00000122406	RPL5	6960.13	0.193983	0.065653	2.95466	0.00313009	0.0199611
ENSG00000103353	UBFD1	223.815	0.51598	0.174641	2.95451	0.00313164	0.0199611
ENSG00000236404	RP11-125B21.2	1.40887	4.54632	1.53978	2.95258	0.00315133	0.0200278
ENSG00000175727	MLXIP	273.098	0.364597	0.123526	2.95159	0.00316144	0.0200618
ENSG00000164975	SNAPC3	109.159	0.498998	0.169097	2.95096	0.00316783	0.0200925
ENSG00000129103	SUMF2	283.231	0.36401	0.123381	2.9503	0.0031747	0.0201163
ENSG00000106078	COBL	277.55	0.37684	0.127823	2.94813	0.00319702	0.0202478
ENSG00000137133	HINT2	196.432	0.321512	0.109165	2.94519	0.00322754	0.020401
ENSG00000167969	ECI1	362.978	0.315298	0.107101	2.94393	0.00324075	0.0204745
ENSG00000225921	NOL7	1225.97	0.203237	0.0690505	2.94331	0.00324723	0.0205054
ENSG00000066926	FECH	76.2243	0.550334	0.187077	2.94175	0.00326363	0.0205989
ENSG00000137207	YIPF3	265.16	0.439013	0.149325	2.93998	0.00328238	0.0207071
ENSG00000173548	SNX33	50.5242	0.657087	0.223521	2.93971	0.00328519	0.0207147
ENSG00000140691	ARMC5	150.506	0.517402	0.176016	2.93951	0.00328731	0.0207179
ENSG00000236609	ZNF853	69.0143	0.715626	0.243529	2.93856	0.0032974	0.0207677
ENSG00000167588	GPD1	256.256	0.41857	0.142445	2.93846	0.00329843	0.0207677
ENSG00000105355	PLIN3	1464.39	0.355233	0.121038	2.93489	0.00333663	0.0209877
ENSG00000172738	TMEM217	22.2358	1.46166	0.499379	2.92695	0.00342301	0.0214579
ENSG00000251350	RP11-328N19.1	2.00349	4.66677	1.59454	2.92673	0.00342549	0.021463
ENSG00000105829	BET1	58.2196	0.825072	0.281993	2.92586	0.00343501	0.0215122
ENSG00000153208	MERTK	241.042	0.398022	0.136112	2.92423	0.00345313	0.0215837
ENSG00000143612	C1orf43	837.168	0.297611	0.101815	2.92306	0.00346607	0.0216541
ENSG00000128881	TTBK2	82.4757	0.700992	0.240002	2.92077	0.00349162	0.0218032
ENSG00000100994	PYGB	236.464	0.360968	0.123622	2.91993	0.00350112	0.0218519
ENSG00000130158	DOCK6	98.6787	0.554709	0.189996	2.91959	0.00350496	0.0218653
ENSG00000100596	SPTLC2	552.914	0.302981	0.103784	2.91933	0.00350783	0.0218706
ENSG00000127561	SYNGR3	8.10591	2.92183	1.00094	2.91907	0.00351077	0.0218706
ENSG00000177706	FAM20C	234.12	0.372296	0.127565	2.91848	0.00351745	0.0219009
ENSG00000130675	MNX1	107.199	0.54127	0.1856	2.91633	0.00354177	0.0220098
ENSG00000106327	TFR2	37.3729	0.629151	0.215872	2.91447	0.00356297	0.0221309
ENSG00000105135	ILVBL	227.792	0.363655	0.124963	2.91011	0.00361301	0.0223935
ENSG00000180354	MTURN	121.856	0.416751	0.143284	2.90856	0.00363098	0.0224883
ENSG00000166685	COG1	211.604	0.389085	0.133937	2.90498	0.00367275	0.0226926
ENSG00000164253	WDR41	127.033	0.413681	0.142421	2.90463	0.00367682	0.0227069
ENSG00000100220	RTCB	404.222	0.285534	0.098386	2.90218	0.00370577	0.0228638
ENSG00000166848	TERF2IP	548.268	0.279902	0.0965148	2.90009	0.00373057	0.0229948
ENSG00000165507	C10orf10	12.3056	1.22051	0.420894	2.8998	0.00373406	0.0230053
ENSG00000141644	MBD1	163.183	0.435387	0.150216	2.8984	0.00375073	0.0230969
ENSG00000120129	DUSP1	158.365	0.792962	0.274062	2.89337	0.00381136	0.0234033
ENSG00000168092	PAFAH1B2	897.929	0.230469	0.0797014	2.89165	0.0038322	0.0235201
ENSG00000135821	GLUL	478.64	0.298896	0.103441	2.88954	0.003858	0.0236282
ENSG00000167110	GOLGA2	916.583	0.426927	0.147753	2.88946	0.00385898	0.0236282
ENSG00000206573	SETD5-AS1	186.438	0.427524	0.14816	2.88555	0.00390736	0.0238904
ENSG00000101199	ARFGAP1	576.111	0.3978	0.137868	2.88537	0.0039095	0.0238922
ENSG00000189067	LITAF	973.265	0.279931	0.097036	2.88482	0.0039164	0.023923
ENSG00000154174	TOMM70A	979.009	0.286542	0.0993752	2.88344	0.00393359	0.0240053
ENSG00000113851	CRBN	136.606	0.41949	0.145492	2.88326	0.00393586	0.0240078
ENSG00000179833	SERTAD2	398.881	0.312846	0.108621	2.88016	0.00397469	0.0241761
ENSG00000141068	KSR1	164.1	0.543798	0.188942	2.87812	0.00400059	0.0242992
ENSG00000130203	APOE	2657.96	0.356187	0.123803	2.87706	0.00401397	0.0243691
ENSG00000040487	PQLC2	163.234	0.443172	0.154074	2.87636	0.00402288	0.0244116
ENSG00000152527	PLEKHH2	154.273	0.699006	0.243118	2.87517	0.00403804	0.0244921
ENSG00000126247	CAPNS1	1016.02	0.341096	0.118726	2.87295	0.00406654	0.0246534
ENSG00000164038	SLC9B2	141.099	0.38955	0.135665	2.87142	0.00408635	0.0247618
ENSG00000262580	RP11-334C17.5	25.9271	1.0116	0.35245	2.87019	0.0041023	0.0248468
ENSG00000188342	GTF2F2	348.362	0.302771	0.105504	2.86974	0.00410806	0.02487
ENSG00000162994	CLHC1	42.6443	0.900138	0.313809	2.86842	0.00412523	0.0249284
ENSG00000161016	RPL8	3502.84	0.310777	0.108385	2.86734	0.00413935	0.0249891
ENSG00000116095	PLEKHA3	275.937	0.403272	0.140773	2.8647	0.00417411	0.0251623
ENSG00000180758	GPR157	230.278	0.313489	0.109437	2.86456	0.00417585	0.0251623
ENSG00000125503	PPP1R12C	125.135	0.451839	0.157833	2.86276	0.00419966	0.0252629
ENSG00000105193	RPS16	6782.76	0.227039	0.0793091	2.86271	0.00420037	0.0252629
ENSG00000131669	NINJ1	635.758	0.276982	0.0967717	2.86222	0.00420686	0.0252888
ENSG00000139718	SETD1B	141.812	0.52358	0.183009	2.86095	0.0042237	0.0253441
ENSG00000269386	RAB11B-AS1	29.4495	1.04032	0.363772	2.85981	0.00423889	0.0254235
ENSG00000100324	TAB1	71.0708	0.499844	0.175218	2.8527	0.00433498	0.0259395
ENSG00000167526	RPL13	4131.99	0.272215	0.0954302	2.8525	0.00433769	0.0259437
ENSG00000023839	ABCC2	1376.69	0.28853	0.101177	2.85175	0.00434797	0.0259931
ENSG00000168701	TMEM208	316.994	0.346029	0.121427	2.84969	0.00437625	0.0261258
ENSG00000152078	TMEM56	153.977	0.400545	0.140571	2.84942	0.0043799	0.0261355
ENSG00000101216	GMEB2	271.928	0.424061	0.148877	2.84839	0.00439411	0.0262082
ENSG00000143398	PIP5K1A	238.201	0.476377	0.167278	2.84782	0.00440204	0.0262434
ENSG00000101350	KIF3B	776.978	0.236974	0.0832265	2.84734	0.00440863	0.0262705
ENSG00000126070	AGO3	116.111	0.479673	0.168549	2.84589	0.00442875	0.0263567
ENSG00000166295	ANAPC16	160.068	0.382951	0.134571	2.84571	0.00443126	0.0263567
ENSG00000142507	PSMB6	1104.59	0.311206	0.109388	2.84497	0.00444154	0.0263814
ENSG00000163362	C1orf106	49.9476	0.71121	0.250013	2.84469	0.00444545	0.0263826
ENSG00000126214	KLC1	260.899	0.359681	0.126441	2.84466	0.00444585	0.0263826
ENSG00000272941	RP11-134L10.1	5.47573	2.27256	0.799324	2.84311	0.0044676	0.026479
ENSG00000198722	UNC13B	58.884	0.712096	0.250468	2.84306	0.00446825	0.026479
ENSG00000171124	FUT3	2.83244	3.74371	1.3182	2.84002	0.00451113	0.0266719
ENSG00000168028	RPSA	1157.74	0.317091	0.111798	2.8363	0.00456395	0.0269472
ENSG00000143543	JTB	551.181	0.271828	0.0959331	2.83351	0.00460396	0.0271461
ENSG00000169891	REPS2	5.29313	2.02712	0.71562	2.83268	0.00461589	0.027204
ENSG00000130313	PGLS	96.5571	0.572377	0.202107	2.83205	0.00462503	0.0272391
ENSG00000217128	FNIP1	192.527	0.37992	0.134157	2.83191	0.00462704	0.0272391
ENSG00000171813	PWWP2B	78.7153	0.605622	0.214091	2.82881	0.00467217	0.0274479
ENSG00000130255	RPL36	4224.64	0.261848	0.0926961	2.8248	0.00473107	0.0277447
ENSG00000144713	RPL32	7361.06	0.228966	0.0810602	2.82464	0.00473333	0.0277447
ENSG00000136813	KIAA0368	994.127	0.324731	0.115089	2.82157	0.00477896	0.0279734
ENSG00000183077	AFMID	659.262	0.327676	0.116296	2.8176	0.00483836	0.0282698
ENSG00000166037	CEP57	540.032	0.277482	0.0985393	2.81595	0.00486331	0.0284027
ENSG00000184368	MAP7D2	243.432	0.357293	0.126889	2.8158	0.00486561	0.0284033
ENSG00000068971	PPP2R5B	10.6691	1.37086	0.487205	2.81372	0.00489716	0.0285616
ENSG00000128309	MPST	304.538	0.397957	0.141579	2.81084	0.0049412	0.0287832
ENSG00000166783	KIAA0430	118.142	0.426047	0.15165	2.80941	0.00496321	0.0288815
ENSG00000101266	CSNK2A1	1299.1	0.22718	0.0808978	2.80824	0.00498129	0.0289606
ENSG00000107404	DVL1	412.651	0.270278	0.0962838	2.8071	0.004999	0.0290505
ENSG00000141568	FOXK2	666.221	0.370481	0.132026	2.80613	0.00501404	0.0291248
ENSG00000160218	TRAPPC10	153.247	0.39872	0.142154	2.80484	0.00503408	0.0291886
ENSG00000134910	STT3A	665.503	0.206754	0.0737532	2.80332	0.00505792	0.0292874
ENSG00000142687	KIAA0319L	334.293	0.31877	0.113828	2.80045	0.00510317	0.0294832
ENSG00000123130	ACOT9	167.981	0.478134	0.170863	2.79834	0.00513657	0.0296496
ENSG00000135924	DNAJB2	142.9	0.469091	0.167659	2.7979	0.00514365	0.0296772
ENSG00000100908	EMC9	142.609	0.362425	0.129548	2.79761	0.00514816	0.02969
ENSG00000162819	BROX	186.986	0.344872	0.123329	2.79637	0.00516809	0.0297649
ENSG00000221978	CCNL2	752.321	0.415095	0.148649	2.79244	0.00523114	0.0300744
ENSG00000113916	BCL6	117.517	0.457747	0.163938	2.7922	0.00523509	0.0300837
ENSG00000134419	RPS15A	1463.84	0.249075	0.0892558	2.79058	0.00526144	0.0302216
ENSG00000177311	ZBTB38	278.057	0.357589	0.12826	2.78801	0.00530332	0.0303945
ENSG00000142751	GPN2	117.342	0.417643	0.149829	2.78746	0.00531223	0.0304234
ENSG00000142459	EVI5L	48.5384	0.570224	0.204571	2.78741	0.00531306	0.0304234
ENSG00000101782	RIOK3	274.838	0.363992	0.130601	2.78705	0.00531909	0.0304443
ENSG00000106665	CLIP2	56.4611	0.598237	0.214766	2.78553	0.00534409	0.0305505
ENSG00000172432	GTPBP2	155.816	1.43364	0.514681	2.78549	0.00534474	0.0305505
ENSG00000272343	RP11-140I16.3	1.87694	3.90398	1.40239	2.7838	0.00537254	0.030684
ENSG00000073614	KDM5A	762.047	0.302078	0.108519	2.78364	0.00537523	0.030684
ENSG00000115561	CHMP3	743.222	0.217588	0.0782975	2.77899	0.00545285	0.0310721
ENSG00000148337	CIZ1	233.837	0.310508	0.111742	2.77879	0.00545623	0.0310777
ENSG00000054116	TRAPPC3	526.287	0.323742	0.116514	2.77857	0.00545995	0.0310851
ENSG00000100243	CYB5R3	1001.93	0.193722	0.0697669	2.7767	0.00549137	0.0312449
ENSG00000165997	ARL5B	388.766	0.381491	0.137394	2.77661	0.00549286	0.0312449
ENSG00000168066	SF1	1189	0.255817	0.0921638	2.77568	0.00550869	0.0313211
ENSG00000125814	NAPB	76.6609	0.594433	0.21426	2.77435	0.00553121	0.0314239
ENSG00000119899	SLC17A5	121.874	0.460767	0.166091	2.77418	0.00553415	0.0314239
ENSG00000172915	NBEA	69.8152	0.529546	0.191411	2.76654	0.00566545	0.0320822
ENSG00000177025	C19orf18	11.257	1.27362	0.460385	2.76643	0.00566741	0.0320822
ENSG00000180953	ST20	59.0063	0.671537	0.2428	2.7658	0.00567829	0.0321156
ENSG00000089157	RPLP0	7442.66	0.263458	0.0952637	2.76556	0.0056825	0.0321253
ENSG00000108176	DNAJC12	2.75375	3.28806	1.18938	2.76451	0.00570088	0.0322151
ENSG00000170315	UBB	4211.61	0.29404	0.106491	2.76117	0.00575956	0.0325039
ENSG00000116260	QSOX1	59.8214	0.6955	0.252228	2.75742	0.00582591	0.0327923
ENSG00000165752	STK32C	86.2286	0.536474	0.1946	2.7568	0.00583696	0.0328402
ENSG00000122203	KIAA1191	381.946	0.327594	0.118847	2.75645	0.00584331	0.0328444
ENSG00000080189	SLC35C2	271.482	0.302838	0.11007	2.75132	0.00593554	0.0332643
ENSG00000116017	ARID3A	2417.09	0.247361	0.0899667	2.74947	0.00596919	0.0334384
ENSG00000137154	RPS6	15222.4	0.201565	0.0733786	2.74692	0.00601571	0.0336843
ENSG00000133059	DSTYK	121.713	0.489738	0.178593	2.74221	0.00610278	0.0341127
ENSG00000231789	RP11-558F24.4	15.0288	1.07876	0.393512	2.74137	0.00611844	0.0341853
ENSG00000005955	GGNBP2	1119.41	0.275537	0.100524	2.74101	0.00612505	0.0342075
ENSG00000124702	KLHDC3	118.369	0.418796	0.15286	2.73973	0.00614898	0.0343114
ENSG00000146830	GIGYF1	219.919	0.501878	0.183277	2.73835	0.00617475	0.0344254
ENSG00000178950	GAK	323.299	0.408635	0.149235	2.73821	0.00617749	0.0344258
ENSG00000175662	TOM1L2	42.9189	0.728081	0.266052	2.73661	0.00620752	0.0345782
ENSG00000116212	LRRC42	303.424	0.315806	0.115466	2.73505	0.00623709	0.034713
ENSG00000013392	RWDD2A	18.2953	1.03265	0.377624	2.73459	0.00624574	0.0347461
ENSG00000259976	RP11-553L6.5	121.694	0.53684	0.19646	2.73257	0.00628431	0.0349306
ENSG00000203879	GDI1	100.092	0.520537	0.190513	2.7323	0.00628942	0.0349439
ENSG00000169567	HINT1	5009.53	0.271164	0.0992709	2.73155	0.00630367	0.035008
ENSG00000081760	AACS	257.068	0.329549	0.120659	2.73124	0.00630967	0.0350263
ENSG00000009950	MLXIPL	1105.15	0.638526	0.233884	2.73009	0.00633171	0.0350904
ENSG00000149716	ORAOV1	137.149	0.466281	0.170794	2.73007	0.0063321	0.0350904
ENSG00000088256	GNA11	732.407	0.214977	0.0787623	2.72944	0.00634429	0.0351429
ENSG00000103460	TOX3	109.232	0.459543	0.168476	2.72765	0.00637873	0.0352882
ENSG00000108292	MLLT6	564.249	0.308617	0.113173	2.72695	0.00639232	0.0353482
ENSG00000133872	TMEM66	970.119	0.359556	0.131868	2.72663	0.00639845	0.0353669
ENSG00000123636	BAZ2B	552.512	0.324094	0.118916	2.7254	0.0064223	0.0354683
ENSG00000158806	NPM2	91.7946	0.46117	0.169463	2.72135	0.00650153	0.0357834
ENSG00000106404	CLDN15	90.6007	0.672459	0.247239	2.71988	0.00653062	0.0359281
ENSG00000142910	TINAGL1	619.256	0.311492	0.114843	2.71231	0.00668152	0.0366645
ENSG00000115295	CLIP4	8.52433	3.24341	1.19609	2.71168	0.0066944	0.036704
ENSG00000270504	RP11-420L9.5	12.0372	1.07694	0.397369	2.71017	0.00672478	0.0368392
ENSG00000114956	DGUOK	411.362	0.286754	0.105896	2.70789	0.00677114	0.0370413
ENSG00000129472	RAB2B	141.441	0.449308	0.165931	2.7078	0.00677315	0.0370413
ENSG00000102100	SLC35A2	220.604	0.419092	0.154853	2.70638	0.00680208	0.0371478
ENSG00000164597	COG5	64.4353	0.512063	0.189213	2.70628	0.00680414	0.0371478
ENSG00000125652	ALKBH7	69.7682	0.518999	0.191799	2.70595	0.00681088	0.0371688
ENSG00000236255	AC009404.2	46.3028	0.765729	0.283017	2.70559	0.00681824	0.0371933
ENSG00000049167	ERCC8	53.2508	0.676117	0.250023	2.70422	0.00684642	0.0372997
ENSG00000130939	UBE4B	283.717	0.361212	0.133591	2.70388	0.00685358	0.037323
ENSG00000073008	PVR	786.518	0.260732	0.0964523	2.70322	0.00686705	0.0373533
ENSG00000170631	ZNF16	62.8962	0.599895	0.221921	2.70319	0.00686769	0.0373533
ENSG00000076201	PTPN23	579.673	0.378595	0.140067	2.70295	0.00687273	0.0373533
ENSG00000179456	ZBTB18	40.3287	0.744789	0.275691	2.70154	0.00690197	0.0374757
ENSG00000170190	SLC16A5	23.859	0.928022	0.343612	2.70078	0.00691761	0.0375448
ENSG00000168065	SLC22A11	11.5949	1.32841	0.491931	2.7004	0.00692561	0.0375567
ENSG00000166925	TSC22D4	59.7623	0.679212	0.251557	2.70003	0.0069333	0.0375825
ENSG00000100266	PACSIN2	274.878	0.356862	0.132248	2.69843	0.0069667	0.0377187
ENSG00000259867	RP11-525K10.3	9.79006	1.55726	0.577928	2.69455	0.00704835	0.0381101
ENSG00000112237	CCNC	590.759	0.22501	0.0835137	2.69429	0.0070538	0.0381236
ENSG00000181788	SIAH2	324.987	0.334729	0.124398	2.69079	0.00712829	0.0384778
ENSG00000148834	GSTO1	948.364	0.220806	0.0821232	2.68872	0.00717261	0.0386847
ENSG00000117616	C1orf63	139.722	0.568225	0.211442	2.68738	0.00720151	0.0388081
ENSG00000071859	FAM50A	152.684	0.446829	0.166287	2.68709	0.00720779	0.0388258
ENSG00000186020	ZNF529	45.9626	0.746688	0.278379	2.68228	0.00731232	0.0393068
ENSG00000174171	RP11-23P13.6	8.66013	1.47004	0.548986	2.67774	0.00741213	0.0397109
ENSG00000157764	BRAF	59.9458	0.567245	0.21196	2.67619	0.00744648	0.0398784
ENSG00000132254	ARFIP2	118.939	0.440391	0.16473	2.6734	0.00750859	0.0401776
ENSG00000137266	SLC22A23	153.553	0.429434	0.160653	2.67305	0.00751658	0.040203
ENSG00000139540	SLC39A5	93.8571	0.455442	0.170392	2.67291	0.00751955	0.040203
ENSG00000129667	RHBDF2	139.952	0.397857	0.148898	2.67201	0.00753984	0.040278
ENSG00000147905	ZCCHC7	180.17	0.386283	0.144675	2.67002	0.00758476	0.0404845
ENSG00000135241	PNPLA8	199.008	0.445674	0.166984	2.66896	0.00760864	0.0405951
ENSG00000177685	EFCAB4A	63.7322	0.558331	0.209244	2.66832	0.00762307	0.0406553
ENSG00000107593	PKD2L1	4.6138	2.11831	0.794393	2.66658	0.00766276	0.0408164
ENSG00000125846	ZNF133	74.3818	0.626343	0.235383	2.66095	0.00779203	0.0414536
ENSG00000135956	TMEM127	502.319	0.316381	0.119049	2.65757	0.00787057	0.0418474
ENSG00000093167	LRRFIP2	266.799	0.368777	0.138769	2.65749	0.00787254	0.0418474
ENSG00000112941	PAPD7	100.382	0.457632	0.1723	2.65601	0.00790702	0.0419615
ENSG00000273174	RP11-434H6.6	5.59954	2.37213	0.893185	2.65581	0.00791185	0.0419699
ENSG00000110321	EIF4G2	4340.5	0.190844	0.0719216	2.65349	0.00796631	0.0422067
ENSG00000163682	RPL9	4103.89	0.318321	0.120081	2.65089	0.0080281	0.0424481
ENSG00000157800	SLC37A3	220.719	0.454786	0.171561	2.65088	0.00802832	0.0424481
ENSG00000181904	C5orf24	230.082	0.350807	0.132373	2.65014	0.00804583	0.0425081
ENSG00000188488	SERPINA5	2215.32	0.278538	0.105184	2.64811	0.00809424	0.0426568
ENSG00000136720	HS6ST1	219.696	0.541725	0.204571	2.6481	0.00809458	0.0426568
ENSG00000109118	PHF12	162.373	0.362661	0.136985	2.64744	0.00811041	0.0426906
ENSG00000141127	PRPSAP2	90.7749	0.448988	0.1696	2.64733	0.0081129	0.0426906
ENSG00000196693	ZNF33B	129.337	0.407569	0.154116	2.64456	0.00817976	0.0430021
ENSG00000148358	GPR107	334.181	0.3157	0.119431	2.64338	0.0082083	0.0431036
ENSG00000008988	RPS20	5452.74	0.204084	0.0772067	2.64335	0.0082091	0.0431036
ENSG00000087842	PIR	174.79	0.363267	0.137531	2.64135	0.00825771	0.0433412
ENSG00000015153	YAF2	115.297	0.444372	0.168516	2.63697	0.00836492	0.0438588
ENSG00000170348	TMED10	1372.16	0.209155	0.0793184	2.63691	0.00836652	0.0438588
ENSG00000146083	RNF44	267.699	0.349093	0.132483	2.63501	0.00841351	0.0440693
ENSG00000145194	ECE2	64.4645	0.62115	0.235813	2.63408	0.00843665	0.0441368
ENSG00000105373	GLTSCR2	359.758	0.32236	0.122407	2.63351	0.00845071	0.0441587
ENSG00000132823	OSER1	242.811	0.324643	0.123277	2.63344	0.00845258	0.0441587
ENSG00000141753	IGFBP4	13.1378	1.3599	0.516441	2.63322	0.00845797	0.0441587
ENSG00000133398	MED10	305.969	0.298182	0.113295	2.6319	0.00849094	0.044295
ENSG00000115170	ACVR1	92.7476	0.583373	0.221881	2.62922	0.00855813	0.0446094
ENSG00000134882	UBAC2	317.539	0.342089	0.130131	2.62881	0.00856848	0.0446454
ENSG00000168476	REEP4	576.284	0.382909	0.145704	2.62799	0.00858922	0.0447173
ENSG00000066739	ATG2B	51.0291	0.602781	0.229577	2.62562	0.0086492	0.0449933
ENSG00000272005	RP11-91J19.4	13.0159	0.98427	0.37521	2.62325	0.00870951	0.0452705
ENSG00000155252	PI4K2A	131.985	0.441042	0.168223	2.62176	0.00874759	0.045418
ENSG00000251192	ZNF674	14.3935	1.10091	0.419919	2.62173	0.00874845	0.045418
ENSG00000240857	RDH14	247.889	0.309681	0.118136	2.62139	0.00875733	0.0454458
ENSG00000146592	CREB5	20.2365	1.23022	0.469567	2.61991	0.00879531	0.0456062
ENSG00000266714	MYO15B	182.403	0.353074	0.134776	2.6197	0.00880066	0.0456156
ENSG00000102572	STK24	479.786	0.252361	0.0963455	2.61933	0.00881023	0.0456469
ENSG00000070159	PTPN3	101.704	0.522488	0.199499	2.61901	0.00881865	0.0456722
ENSG00000138433	CIR1	612.296	0.312407	0.119294	2.61879	0.0088242	0.0456826
ENSG00000214160	ALG3	711.273	0.29876	0.114215	2.61578	0.00890246	0.0460692
ENSG00000181704	YIPF6	346.447	0.291207	0.111491	2.61194	0.00900302	0.046515
ENSG00000128923	FAM63B	139.664	0.363328	0.139123	2.61156	0.00901296	0.0465477
ENSG00000197860	SGTB	46.7678	0.799185	0.306431	2.60804	0.00910625	0.0469469
ENSG00000141646	SMAD4	124.406	0.388818	0.149089	2.60796	0.00910845	0.0469469
ENSG00000123983	ACSL3	2010.87	0.201017	0.0771183	2.60661	0.00914446	0.0470949
ENSG00000101493	ZNF516	67.385	0.549608	0.211002	2.60475	0.00919411	0.0473128
ENSG00000128590	DNAJB9	300.557	0.921153	0.353871	2.60307	0.00923924	0.0475261
ENSG00000080845	DLGAP4	342.019	0.338552	0.130088	2.60249	0.00925498	0.0475502
ENSG00000178252	WDR6	287.757	0.444004	0.170678	2.60141	0.00928411	0.0476803
ENSG00000154309	DISP1	31.3591	0.777473	0.299055	2.59976	0.00932883	0.0478354
ENSG00000009830	POMT2	507.41	0.426528	0.164065	2.59976	0.00932902	0.0478354
ENSG00000158158	CNNM4	108.343	0.510709	0.196567	2.59815	0.00937284	0.0480409
ENSG00000141510	TP53	150.654	0.362107	0.139502	2.5957	0.00943972	0.0483261
ENSG00000268713	CTC-444N24.8	46.9588	0.722879	0.278732	2.59345	0.0095017	0.0485882
ENSG00000214491	SEC14L6	49.3457	0.622548	0.240453	2.58907	0.00962365	0.0491313
ENSG00000125798	FOXA2	386.164	0.216564	0.0836791	2.58803	0.00965276	0.0492409
ENSG00000064601	CTSA	1316.83	0.213976	0.0826902	2.58769	0.00966226	0.0492699
ENSG00000001461	NIPAL3	46.5212	0.782567	0.302742	2.58493	0.00973987	0.0496064
ENSG00000071553	ATP6AP1	650.958	0.255582	0.0989124	2.58392	0.00976832	0.0496341
ENSG00000105879	CBLL1	82.1726	0.434882	0.168442	2.58179	0.00982893	0.0498636
ENSG00000150991	UBC	6624.97	0.321122	0.124452	2.58028	0.00987191	0.050046
ENSG00000174652	ZNF266	64.8462	0.616193	0.238829	2.58006	0.0098783	0.050046
ENSG00000103375	AQP8	27.0066	0.752412	0.291672	2.57965	0.00989	0.0500749
ENSG00000239704	CDRT4	5.06411	1.83718	0.712241	2.57943	0.00989636	0.0500874
ENSG00000107796	ACTA2	334.772	0.422845	0.164034	2.57778	0.00994361	0.0502477
ENSG00000170088	TMEM192	281.419	0.311824	0.121018	2.57668	0.00997549	0.0503654
ENSG00000142453	CARM1	565.667	0.340757	0.132261	2.57639	0.00998366	0.0503654
ENSG00000198736	MSRB1	341.424	0.262194	0.101774	2.57624	0.0099882	0.0503654
ENSG00000171729	TMEM51	366.158	0.245914	0.095457	2.57617	0.00999004	0.0503654
ENSG00000273015	LINC00938	26.7501	0.717804	0.278766	2.57493	0.010026	0.0505258
ENSG00000153317	ASAP1	652.059	0.232561	0.0903239	2.57474	0.0100314	0.0505288
ENSG00000223482	NUTM2A-AS1	54.5362	0.676938	0.26312	2.57273	0.0100899	0.0507879
ENSG00000047644	WWC3	84.9383	0.47642	0.185272	2.57146	0.0101271	0.0509516
ENSG00000116871	MAP7D1	201.052	0.358697	0.139502	2.57127	0.0101327	0.0509516
ENSG00000174444	RPL4	2832.84	0.232955	0.090601	2.57121	0.0101342	0.0509516
ENSG00000088179	PTPN4	100.257	0.478745	0.186242	2.57055	0.0101537	0.0510109
ENSG00000130684	ZNF337	165.013	0.44193	0.172003	2.56931	0.0101901	0.0511725
ENSG00000109046	WSB1	1127.21	0.328314	0.127822	2.56852	0.0102133	0.0512692
ENSG00000170265	ZNF282	302.763	0.398989	0.155354	2.56826	0.0102209	0.0512876
ENSG00000269858	EGLN2	106.108	0.461131	0.179574	2.56792	0.0102311	0.0513115
ENSG00000155313	USP25	129.926	0.397941	0.154972	2.56783	0.0102337	0.0513115
ENSG00000164077	MON1A	58.5599	0.636264	0.247842	2.56721	0.0102519	0.0513632
ENSG00000108946	PRKAR1A	939.34	0.227854	0.0888031	2.56583	0.0102928	0.0515279
ENSG00000129646	QRICH2	2.50535	2.57796	1.00575	2.56323	0.0103704	0.0518761
ENSG00000203880	PCMTD2	88.102	0.41312	0.161205	2.5627	0.0103863	0.0519354
ENSG00000177954	RPS27	2231.34	0.313534	0.122398	2.5616	0.0104191	0.0520794
ENSG00000197375	SLC22A5	55.4343	0.44342	0.173321	2.55837	0.0105163	0.052504
ENSG00000145354	CISD2	305.504	0.303225	0.118548	2.55782	0.0105331	0.0525675
ENSG00000126522	ASL	115.77	0.383877	0.150418	2.55207	0.0107085	0.0532987
ENSG00000181097	RP11-429J17.2	120.889	0.454679	0.178266	2.55056	0.0107549	0.0535089
ENSG00000169016	E2F6	389.644	0.323032	0.126738	2.54882	0.0108088	0.0537089
ENSG00000126432	PRDX5	645.112	0.374347	0.146876	2.54873	0.0108117	0.0537089
ENSG00000160948	VPS28	383.999	0.2727	0.107068	2.54697	0.0108663	0.0539595
ENSG00000177731	FLII	318.694	0.27014	0.106108	2.5459	0.0108996	0.054077
ENSG00000127580	WDR24	27.2084	0.74378	0.292284	2.54472	0.0109366	0.054225
ENSG00000158805	ZNF276	93.2199	0.597326	0.234807	2.5439	0.0109623	0.0543264
ENSG00000259758	CASC7	297.59	0.412029	0.161974	2.5438	0.0109655	0.0543264
ENSG00000198034	RPS4X	6008.36	0.258264	0.101608	2.54176	0.0110296	0.0546018
ENSG00000044090	CUL7	112.122	0.451207	0.177568	2.54103	0.0110526	0.0546858
ENSG00000020129	NCDN	154.917	0.443936	0.17479	2.53982	0.0110909	0.0548422
ENSG00000204842	ATXN2	350.814	0.279315	0.11004	2.5383	0.0111391	0.0550177
ENSG00000171853	TRAPPC12	125.291	0.461209	0.181721	2.538	0.0111487	0.0550436
ENSG00000084676	NCOA1	133.307	0.358366	0.141254	2.53703	0.0111798	0.055155
ENSG00000233559	AC016831.7	26.5012	0.903721	0.356267	2.53664	0.0111923	0.0551957
ENSG00000168591	TMUB2	168.478	0.349369	0.137778	2.53575	0.0112207	0.0552935
ENSG00000153214	TMEM87B	236.925	0.267814	0.105727	2.53306	0.011307	0.0556237
ENSG00000023572	GLRX2	173.676	0.364208	0.143791	2.5329	0.0113123	0.0556237
ENSG00000158079	PTPDC1	65.6212	0.636234	0.251315	2.53162	0.0113538	0.0558002
ENSG00000197102	DYNC1H1	3252.06	0.388457	0.1535	2.53066	0.0113848	0.0558672
ENSG00000198815	FOXJ3	116.02	0.40112	0.158757	2.52663	0.0115162	0.0564479
ENSG00000102125	TAZ	95.6503	0.374138	0.148195	2.52463	0.011582	0.0567058
ENSG00000133195	SLC39A11	97.458	0.432535	0.171369	2.52399	0.0116031	0.0567869
ENSG00000138326	RPS24	13946.4	0.206321	0.0818045	2.52212	0.011665	0.0570039
ENSG00000094975	SUCO	698.334	0.247458	0.0982393	2.51893	0.0117712	0.0574576
ENSG00000197951	ZNF71	29.323	0.768249	0.30503	2.5186	0.0117821	0.0574891
ENSG00000178026	FAM211B	28.2744	0.75246	0.2989	2.51744	0.0118213	0.0576391
ENSG00000145214	DGKQ	63.3315	0.645378	0.256409	2.51699	0.0118363	0.057666
ENSG00000144741	SLC25A26	122.101	0.444797	0.176829	2.51541	0.0118894	0.057903
ENSG00000141034	GID4	58.0965	0.606141	0.241198	2.51304	0.0119696	0.0582056
ENSG00000184634	MED12	47.4921	0.60621	0.241346	2.51179	0.012012	0.0583897
ENSG00000054282	SDCCAG8	112.913	0.454634	0.181263	2.50814	0.0121368	0.0589522
ENSG00000272068	RP11-284F21.9	34.547	0.761417	0.30391	2.5054	0.0122314	0.0593668
ENSG00000144224	UBXN4	3037.27	0.172604	0.0689111	2.50474	0.0122543	0.0594334
ENSG00000058453	CROCC	36.8146	0.676507	0.270267	2.50311	0.0123107	0.0596397
ENSG00000135454	B4GALNT1	141.712	0.471163	0.188244	2.50294	0.0123166	0.059646
ENSG00000138303	ASCC1	110.299	0.473868	0.189484	2.50083	0.0123903	0.05998
ENSG00000183779	ZNF703	762.664	0.363042	0.14526	2.49925	0.0124456	0.0601575
ENSG00000163346	PBXIP1	50.6873	0.502099	0.200924	2.49895	0.0124563	0.0601867
ENSG00000236104	ZBTB22	13.4467	0.899145	0.359888	2.4984	0.0124755	0.0602136
ENSG00000111077	TENC1	83.975	0.439521	0.176132	2.4954	0.0125815	0.0606046
ENSG00000163374	YY1AP1	154.812	0.38131	0.152848	2.49469	0.0126066	0.0606857
ENSG00000082781	ITGB5	667.172	0.24864	0.0996788	2.49441	0.0126166	0.0607111
ENSG00000151445	VIPAS39	84.2248	0.500012	0.200484	2.49402	0.0126305	0.0607326
ENSG00000010803	SCMH1	135.929	0.404503	0.162217	2.49359	0.012646	0.0607845
ENSG00000175287	PHYHD1	193.413	0.463803	0.186101	2.49221	0.0126952	0.0609985
ENSG00000100393	EP300	416.64	0.271445	0.108941	2.49167	0.0127144	0.0610272
ENSG00000171160	MORN4	18.6573	1.13572	0.456042	2.49038	0.0127605	0.0611981
ENSG00000170242	USP47	723.291	0.258283	0.103718	2.49025	0.0127653	0.0611986
ENSG00000168994	PXDC1	44.7533	0.810467	0.325785	2.48773	0.012856	0.0615313
ENSG00000112320	SOBP	130.706	0.43822	0.176157	2.48766	0.0128586	0.0615313
ENSG00000140577	CRTC3	139.403	0.357328	0.143673	2.48709	0.0128792	0.061607
ENSG00000175221	MED16	79.4595	0.424852	0.171046	2.48385	0.0129972	0.0620972
ENSG00000183826	BTBD9	20.9239	0.903663	0.36385	2.48361	0.0130057	0.0620972
ENSG00000185236	RAB11B	423.189	0.366778	0.147713	2.48304	0.0130266	0.0621701
ENSG00000112679	DUSP22	165.483	0.333542	0.13434	2.48283	0.0130345	0.0621701
ENSG00000114999	TTL	822.064	0.281622	0.113532	2.48056	0.0131175	0.0624887
ENSG00000135631	RAB11FIP5	213.242	0.352105	0.141952	2.48045	0.0131216	0.0624887
ENSG00000037637	FBXO42	98.7164	0.436004	0.175861	2.47925	0.0131658	0.0626298
ENSG00000023191	RNH1	331.188	0.278302	0.112304	2.47812	0.0132075	0.0627908
ENSG00000083845	RPS5	5042.25	0.299109	0.120702	2.47807	0.0132094	0.0627908
ENSG00000234432	RP11-1275H24.1	26.6423	0.882466	0.356553	2.47499	0.0133239	0.063242
ENSG00000272114	RP1-261G23.7	7.93651	1.42241	0.574927	2.47408	0.013358	0.0633806
ENSG00000100296	THOC5	212.477	0.335356	0.13583	2.46895	0.0135511	0.0641788
ENSG00000111961	SASH1	123.09	0.373247	0.151216	2.46831	0.0135754	0.0642703
ENSG00000100151	PICK1	39.8339	0.665497	0.269646	2.46804	0.0135854	0.0642922
ENSG00000166557	TMED3	463.737	0.30281	0.122705	2.46779	0.013595	0.0642922
ENSG00000196458	ZNF605	12.1548	1.42024	0.575772	2.46667	0.0136374	0.0644456
ENSG00000166169	POLL	89.9109	0.529288	0.214742	2.46476	0.0137103	0.0647426
ENSG00000117481	NSUN4	113.9	0.39481	0.160261	2.46354	0.0137572	0.0649166
ENSG00000156639	ZFAND3	432.011	0.742287	0.301469	2.46223	0.0138074	0.0651252
ENSG00000092439	TRPM7	543.379	0.255196	0.103649	2.46213	0.0138115	0.0651252
ENSG00000179292	TMEM151A	1.93299	3.42309	1.39089	2.46108	0.0138519	0.0652918
ENSG00000176485	PLA2G16	556.823	0.324275	0.131786	2.46062	0.0138697	0.0653281
ENSG00000171492	LRRC8D	87.6899	0.433486	0.176188	2.46036	0.0138798	0.0653405
ENSG00000144029	MRPS5	957.77	0.195484	0.0794601	2.46016	0.0138876	0.0653405
ENSG00000160062	ZBTB8A	75.7577	0.52906	0.215087	2.45975	0.0139035	0.0653916
ENSG00000164323	KIAA1430	639.612	0.269855	0.109729	2.45928	0.0139216	0.0654292
ENSG00000164244	PRRC1	370.954	0.260644	0.106113	2.45629	0.0140381	0.0659287
ENSG00000206052	DOK6	180.06	0.348092	0.141762	2.45547	0.0140702	0.0660305
ENSG00000180035	ZNF48	46.7769	0.597756	0.243448	2.45537	0.0140738	0.0660305
ENSG00000160408	ST6GALNAC6	29.69	0.713612	0.290637	2.45534	0.0140752	0.0660305
ENSG00000260236	RP11-708J19.1	19.5105	0.794028	0.323684	2.4531	0.0141633	0.0663714
ENSG00000099203	TMED1	76.0881	0.427567	0.174351	2.45234	0.0141932	0.0664876
ENSG00000126767	ELK1	19.4282	0.954219	0.389249	2.45143	0.0142289	0.0666304
ENSG00000138107	ACTR1A	434.402	0.26678	0.108845	2.451	0.0142458	0.0666854
ENSG00000118922	KLF12	5.02577	1.46353	0.597544	2.44925	0.0143154	0.066987
ENSG00000171863	RPS7	6617.6	0.234735	0.0958545	2.44886	0.0143307	0.0670344
ENSG00000085231	TAF9	647.781	0.224917	0.0918773	2.44801	0.0143647	0.0670797
ENSG00000019995	ZRANB1	216.261	0.312119	0.127501	2.44797	0.0143664	0.0670797
ENSG00000113384	GOLPH3	258.644	0.29069	0.118768	2.44754	0.0143835	0.0671353
ENSG00000269963	RP11-73M18.9	4.28051	2.66559	1.08931	2.44704	0.0144034	0.0671589
ENSG00000196387	ZNF140	16.1347	0.936951	0.382895	2.44702	0.0144042	0.0671589
ENSG00000100290	BIK	19.1095	1.00209	0.409537	2.44688	0.0144097	0.0671604
ENSG00000124486	USP9X	462.731	0.246396	0.100819	2.44394	0.0145277	0.0676124
ENSG00000164690	SHH	41.4919	0.530599	0.21713	2.4437	0.0145376	0.0676344
ENSG00000243279	PRAF2	3.89006	1.94122	0.794452	2.44347	0.0145469	0.0676532
ENSG00000137818	RPLP1	10263.6	0.197262	0.0807657	2.4424	0.01459	0.0677803
ENSG00000068305	MEF2A	119.087	0.375076	0.153623	2.44154	0.0146247	0.0679168
ENSG00000132003	ZSWIM4	6.84522	2.25252	0.922786	2.441	0.0146467	0.0679873
ENSG00000144161	ZC3H8	335.277	0.26683	0.109322	2.44078	0.0146557	0.0679873
ENSG00000240682	ISY1	425.176	0.324489	0.132988	2.43999	0.0146878	0.0680874
ENSG00000135040	NAA35	349.921	0.299638	0.122989	2.43631	0.014838	0.0685866
ENSG00000130589	HELZ2	239.025	0.368029	0.151138	2.43506	0.0148894	0.0687858
ENSG00000101457	DNTTIP1	498.032	0.298728	0.12273	2.43402	0.0149321	0.0689229
ENSG00000162604	TM2D1	281.613	0.335111	0.137835	2.43124	0.0150471	0.069379
ENSG00000132912	DCTN4	254.79	0.370161	0.152454	2.42802	0.0151813	0.069948
ENSG00000105707	HPN	160.389	0.323758	0.133357	2.42775	0.0151927	0.0699753
ENSG00000178982	EIF3K	696.805	0.267312	0.110117	2.42753	0.0152022	0.0699941
ENSG00000198478	SH3BGRL2	69.6981	0.501891	0.206766	2.42733	0.0152103	0.0700065
ENSG00000185043	CIB1	466.315	0.243165	0.100192	2.42699	0.0152246	0.0700474
ENSG00000111671	SPSB2	35.1495	0.632924	0.261336	2.42188	0.0154405	0.0708889
ENSG00000155158	TTC39B	33.0929	0.543447	0.224573	2.41992	0.015524	0.0712215
ENSG00000214113	LYRM4	369.092	0.262905	0.108754	2.41744	0.0156301	0.0716196
ENSG00000072042	RDH11	892.334	0.189446	0.0784058	2.41622	0.0156826	0.071745
ENSG00000100065	CARD10	117.58	0.397709	0.164632	2.41574	0.0157032	0.071814
ENSG00000177854	TMEM187	22.4807	0.789973	0.327031	2.41559	0.0157098	0.0718188
ENSG00000179010	MRFAP1	1981.53	0.188647	0.0781387	2.41426	0.0157671	0.0720039
ENSG00000141867	BRD4	3474.8	0.362351	0.150181	2.41276	0.0158321	0.0722242
ENSG00000095066	HOOK2	96.4213	0.488959	0.20281	2.41092	0.0159122	0.0725125
ENSG00000260136	CTD-2270L9.4	25.2376	0.760785	0.315828	2.40886	0.0160024	0.072845
ENSG00000041880	PARP3	79.9935	0.420499	0.174577	2.40868	0.0160105	0.072845
ENSG00000147604	RPL7	3052.06	0.234672	0.0974288	2.40865	0.0160116	0.072845
ENSG00000185896	LAMP1	2110.25	0.191891	0.0796803	2.40826	0.0160289	0.072845
ENSG00000043355	ZIC2	113.402	0.364931	0.151567	2.40773	0.0160521	0.0728928
ENSG00000161835	GRASP	21.5038	0.839164	0.348977	2.40464	0.0161884	0.0733463
ENSG00000185436	IFNLR1	59.681	0.646402	0.26882	2.40459	0.0161907	0.0733463
ENSG00000269318	AC007292.3	15.4787	1.29963	0.540502	2.40449	0.0161949	0.0733463
ENSG00000171475	WIPF2	732.417	0.256494	0.106675	2.40444	0.0161974	0.0733463
ENSG00000133606	MKRN1	276.046	0.316263	0.131533	2.40444	0.0161975	0.0733463
ENSG00000175806	MSRA	46.8901	0.57728	0.240106	2.40427	0.0162048	0.0733539
ENSG00000101310	SEC23B	480.925	0.28353	0.118013	2.40253	0.016282	0.0736256
ENSG00000179476	C14orf28	22.0669	0.775815	0.323179	2.40057	0.0163695	0.0739773
ENSG00000177030	DEAF1	120.17	0.398334	0.165936	2.40053	0.0163712	0.0739773
ENSG00000166887	VPS39	85.3019	0.445832	0.185834	2.39908	0.0164361	0.0742186
ENSG00000008441	NFIX	182.416	0.360103	0.150137	2.3985	0.0164624	0.0743114
ENSG00000120686	UFM1	270.439	0.400205	0.166882	2.39812	0.0164793	0.0743156
ENSG00000134698	AGO4	49.1197	0.573292	0.239062	2.39809	0.0164806	0.0743156
ENSG00000117592	PRDX6	970.381	0.167132	0.0697115	2.39748	0.0165084	0.0743272
ENSG00000229645	LINC00341	19.329	0.718305	0.299619	2.3974	0.016512	0.0743272
ENSG00000157106	SMG1	369.264	0.300231	0.125301	2.39608	0.0165715	0.0745429
ENSG00000147144	CCDC120	61.4428	0.642103	0.268029	2.39565	0.0165911	0.0746049
ENSG00000063177	RPL18	4853.79	0.222226	0.0928016	2.39463	0.0166371	0.0747337
ENSG00000135404	CD63	3405.25	0.213323	0.0891146	2.39381	0.0166743	0.0748748
ENSG00000010219	DYRK4	85.9923	0.508567	0.212505	2.3932	0.0167022	0.0749579
ENSG00000187098	MITF	3.15063	2.51115	1.04931	2.39315	0.0167044	0.0749579
ENSG00000174100	MRPL45	729.799	0.291807	0.122088	2.39014	0.016842	0.0754703
ENSG00000174748	RPL15	3634.96	0.182091	0.0761995	2.38966	0.016864	0.0755426
ENSG00000160325	CACFD1	110.012	0.452626	0.189502	2.38851	0.0169169	0.0757268
ENSG00000188112	C6orf132	196.72	0.372773	0.156332	2.3845	0.0171023	0.0763977
ENSG00000141198	TOM1L1	129.486	0.414363	0.173923	2.38245	0.0171979	0.0767715
ENSG00000146477	SLC22A3	163.552	0.300331	0.126121	2.38129	0.0172521	0.076987
ENSG00000175390	EIF3F	301.944	0.276399	0.116088	2.38095	0.017268	0.0770074
ENSG00000105928	DFNA5	276.101	0.26591	0.111695	2.38068	0.0172806	0.0770074
ENSG00000196235	SUPT5H	468.563	0.266774	0.112068	2.38047	0.0172906	0.0770176
ENSG00000186376	ZNF75D	42.9855	0.706583	0.296964	2.37935	0.0173431	0.0771262
ENSG00000101928	MOSPD1	77.2596	0.516164	0.217033	2.37828	0.0173938	0.0773043
ENSG00000162591	MEGF6	7.2207	1.15682	0.486418	2.37825	0.0173951	0.0773043
ENSG00000057935	MTA3	103.142	0.387173	0.162838	2.37766	0.0174231	0.077402
ENSG00000089091	DZANK1	10.063	1.20159	0.505573	2.37669	0.0174688	0.0775233
ENSG00000147614	ATP6V0D2	9.36289	2.8887	1.21549	2.37657	0.0174744	0.0775233
ENSG00000182831	C16orf72	180.972	0.40865	0.171959	2.37644	0.0174806	0.0775239
ENSG00000068028	RASSF1	101.963	0.525492	0.221164	2.37603	0.0175001	0.077537
ENSG00000148339	SLC25A25	187.872	0.314172	0.132227	2.376	0.0175016	0.077537
ENSG00000178537	SLC25A20	65.5368	0.56143	0.236389	2.37503	0.0175477	0.0776857
ENSG00000204599	TRIM39	89.5442	0.44633	0.187988	2.37424	0.0175851	0.0778002
ENSG00000181830	SLC35C1	157.422	0.371191	0.156381	2.37362	0.0176145	0.0779034
ENSG00000124613	ZNF391	6.75983	1.38531	0.583699	2.37333	0.0176286	0.077939
ENSG00000103091	WDR59	243.804	0.263704	0.111272	2.3699	0.0177928	0.0784233
ENSG00000135090	TAOK3	440.316	0.265513	0.112068	2.36922	0.0178255	0.078487
ENSG00000173230	GOLGB1	2070.97	0.276129	0.116555	2.36909	0.0178321	0.0784892
ENSG00000116957	TBCE	142.731	0.340966	0.14411	2.36601	0.017981	0.0790639
ENSG00000086102	NFX1	286.951	0.305341	0.12906	2.36587	0.0179876	0.0790659
ENSG00000177732	SOX12	613.744	0.197511	0.0835002	2.36539	0.0180109	0.0791056
ENSG00000225470	JPX	187.065	0.320046	0.135455	2.36274	0.0181402	0.0795736
ENSG00000182087	TMEM259	813.599	0.259513	0.110026	2.35865	0.0183418	0.080376
ENSG00000160201	U2AF1	2869.58	0.181675	0.0771966	2.35341	0.0186022	0.0813792
ENSG00000163960	UBXN7	424.516	0.237767	0.101108	2.35161	0.0186924	0.0817154
ENSG00000158402	CDC25C	117.162	0.369787	0.157256	2.35149	0.0186984	0.0817154
ENSG00000213865	C8orf44	12.9374	0.87835	0.373603	2.35102	0.0187219	0.0817362
ENSG00000148498	PARD3	463.528	0.224312	0.095464	2.3497	0.0187887	0.0819449
ENSG00000174915	PTDSS2	124.409	0.31678	0.134934	2.34767	0.0188914	0.082229
ENSG00000111911	HINT3	149.703	0.351337	0.149655	2.34765	0.0188924	0.082229
ENSG00000166454	ATMIN	336.534	0.231416	0.0985778	2.34754	0.0188977	0.082229
ENSG00000170266	GLB1	273.046	0.327873	0.139667	2.34753	0.0188985	0.082229
ENSG00000242349	NPPA-AS1	26.766	0.880904	0.375489	2.34602	0.0189751	0.0825347
ENSG00000184983	NDUFA6	883.257	0.217686	0.092834	2.34489	0.0190325	0.0827564
ENSG00000270194	RP11-259K5.2	8.28505	1.26224	0.538591	2.34359	0.019099	0.0829338
ENSG00000181690	PLAG1	29.8533	0.723737	0.308855	2.34329	0.0191144	0.0829515
ENSG00000135250	SRPK2	445.783	0.339681	0.144966	2.34317	0.0191205	0.0829515
ENSG00000147912	FBXO10	16.8363	0.949783	0.405347	2.34314	0.0191224	0.0829515
ENSG00000119121	TRPM6	9.08618	1.19404	0.509867	2.34187	0.0191872	0.0831767
ENSG00000251323	RP11-452H21.4	4.60203	1.65352	0.70729	2.33783	0.019396	0.0838848
ENSG00000101654	RNMT	350.618	0.272338	0.116533	2.33701	0.0194387	0.0840128
ENSG00000082684	SEMA5B	10.2399	1.12722	0.482544	2.336	0.0194914	0.0841845
ENSG00000125877	ITPA	670.557	0.320132	0.137213	2.33311	0.0196424	0.0847799
ENSG00000253598	SLC10A5	2.77082	2.42422	1.03979	2.33145	0.0197295	0.0850133
ENSG00000234684	SDCBP2-AS1	20.0003	0.762721	0.327569	2.32843	0.0198893	0.0855593
ENSG00000221983	UBA52	3811.9	0.269168	0.115717	2.32609	0.0200137	0.0860367
ENSG00000160058	BSDC1	327.838	0.397814	0.171039	2.32586	0.0200259	0.0860605
ENSG00000172071	EIF2AK3	211.52	0.398303	0.171265	2.32566	0.0200368	0.0860789
ENSG00000135365	PHF21A	40.0027	0.596482	0.256502	2.32545	0.0200477	0.0860971
ENSG00000144118	RALB	283.804	0.285786	0.122927	2.32484	0.0200807	0.0861827
ENSG00000214944	ARHGEF28	143.964	0.37225	0.160134	2.32461	0.0200927	0.0861827
ENSG00000135407	AVIL	3.56238	1.79938	0.774066	2.32458	0.0200944	0.0861827
ENSG00000108433	GOSR2	205.465	0.324064	0.139448	2.32391	0.0201301	0.0863074
ENSG00000107521	HPS1	239.352	0.257933	0.11109	2.32184	0.0202418	0.0866422
ENSG00000198074	AKR1B10	502.257	0.508241	0.218954	2.32122	0.0202749	0.0867264
ENSG00000100814	CCNB1IP1	225.675	0.310918	0.134096	2.31862	0.0204158	0.0872422
ENSG00000065485	PDIA5	295.717	0.295242	0.127381	2.31778	0.0204611	0.0873968
ENSG00000132840	BHMT2	83.9342	0.505346	0.218038	2.3177	0.0204655	0.0873968
ENSG00000160691	SHC1	145.903	0.360556	0.155617	2.31694	0.0205071	0.0874877
ENSG00000163249	CCNYL1	239.191	0.242968	0.104903	2.31611	0.0205521	0.0876505
ENSG00000139637	C12orf10	262.242	0.266107	0.114928	2.31543	0.0205896	0.0877523
ENSG00000132359	RAP1GAP2	95.164	0.41731	0.180436	2.31279	0.0207341	0.088179
ENSG00000010319	SEMA3G	34.7826	0.64381	0.278377	2.31273	0.0207375	0.088179
ENSG00000253352	TUG1	435.596	0.249893	0.108083	2.31205	0.020775	0.0883091
ENSG00000260276	RP11-77H9.2	8.67585	1.40349	0.60724	2.31126	0.0208186	0.0883632
ENSG00000076043	REXO2	459.114	0.25234	0.109183	2.31117	0.0208236	0.0883632
ENSG00000196781	TLE1	232.146	0.265068	0.114695	2.31107	0.0208288	0.0883632
ENSG00000110066	SUV420H1	223.824	0.342394	0.148185	2.31058	0.0208562	0.0884503
ENSG00000198933	TBKBP1	5.67723	2.79725	1.2113	2.30929	0.0209274	0.0886465
ENSG00000106305	AIMP2	627.146	0.21132	0.0915105	2.30925	0.0209299	0.0886465
ENSG00000221916	C19orf73	5.29354	1.49481	0.647518	2.30853	0.0209696	0.0887563
ENSG00000086730	LAT2	5.13626	1.70318	0.738556	2.3061	0.021105	0.0892463
ENSG00000076108	BAZ2A	529.296	0.214041	0.0928331	2.30566	0.0211296	0.0892463
ENSG00000213699	SLC35F6	499.727	0.264979	0.114928	2.30561	0.0211325	0.0892463
ENSG00000166471	TMEM41B	280.12	0.351965	0.152713	2.30474	0.021181	0.0894161
ENSG00000165626	BEND7	232.974	0.372988	0.162055	2.30161	0.0213569	0.0899822
ENSG00000183597	TANGO2	120.222	0.396732	0.17254	2.29937	0.0214842	0.0904004
ENSG00000131381	ZFYVE20	139.373	0.383522	0.167126	2.29481	0.0217439	0.0913143
ENSG00000133812	SBF2	80.6463	0.42644	0.185938	2.29345	0.0218223	0.091571
ENSG00000122376	FAM35A	178.685	0.27369	0.119378	2.29263	0.0218695	0.0916629
ENSG00000176222	ZNF404	2.8769	2.48278	1.08411	2.29016	0.0220123	0.0921939
ENSG00000120685	PROSER1	180.039	0.300241	0.131113	2.28994	0.0220248	0.0921939
ENSG00000205730	ITPRIPL2	152.608	0.343423	0.150183	2.28669	0.0222137	0.0927441
ENSG00000273247	RP11-83A24.2	56.9994	0.605452	0.264821	2.28627	0.0222385	0.0928173
ENSG00000187997	C17orf99	13.4281	0.86684	0.379357	2.28502	0.0223115	0.0930619
ENSG00000167995	BEST1	3.2011	3.2184	1.40864	2.28476	0.0223271	0.0930969
ENSG00000132879	FBXO44	92.7313	0.501567	0.219557	2.28445	0.0223454	0.093143
ENSG00000174990	CA5A	31.481	0.575133	0.251989	2.28237	0.0224675	0.0935613
ENSG00000132740	IGHMBP2	124.705	0.420064	0.18425	2.27986	0.0226162	0.094097
ENSG00000171858	RPS21	11603.5	0.237404	0.104158	2.27927	0.022651	0.0941735
ENSG00000100445	SDR39U1	148.563	0.314053	0.137814	2.27882	0.0226776	0.0942536
ENSG00000213965	NUDT19	13.7868	0.950961	0.41768	2.27677	0.0228	0.0947013
ENSG00000110871	COQ5	134.706	0.342328	0.150476	2.27497	0.0229077	0.0949959
ENSG00000226445	XXyac-YX65C7_A.2	11.103	1.08544	0.477161	2.27479	0.0229188	0.0950114
ENSG00000175387	SMAD2	325.834	0.256	0.112561	2.27432	0.0229469	0.0950973
ENSG00000135049	AGTPBP1	115.439	0.403367	0.177438	2.27328	0.0230091	0.0952939
ENSG00000197798	FAM118B	81.8793	0.427494	0.188192	2.27158	0.0231119	0.0956584
ENSG00000123329	ARHGAP9	3.31209	2.00805	0.884344	2.27066	0.0231674	0.095857
ENSG00000236423	LINC01134	12.735	0.951522	0.419076	2.27053	0.0231757	0.0958607
ENSG00000113552	GNPDA1	717.515	0.251811	0.111269	2.26308	0.0236306	0.0975607
ENSG00000078061	ARAF	83.0956	0.433167	0.191408	2.26306	0.0236321	0.0975607
ENSG00000197111	PCBP2	1782.53	0.16464	0.0727804	2.26215	0.0236879	0.0977289
ENSG00000204498	NFKBIL1	125.775	0.540468	0.238941	2.26193	0.0237019	0.0977553
ENSG00000135744	AGT	5120.62	0.203539	0.0900228	2.26098	0.0237608	0.0979354
ENSG00000108679	LGALS3BP	879.388	0.197516	0.0874277	2.25919	0.0238717	0.0982671
ENSG00000179988	PSTK	15.1038	0.871807	0.385969	2.25875	0.0238992	0.0983487
ENSG00000174485	DENND4A	130.956	0.37151	0.164553	2.25768	0.0239653	0.0985894
ENSG00000089876	DHX32	69.74	0.454576	0.201498	2.25598	0.0240716	0.0989005
ENSG00000100242	SUN2	1011.48	0.250188	0.111049	2.25295	0.0242625	0.0995263
ENSG00000196453	ZNF777	49.4735	0.516498	0.22965	2.24907	0.0245083	0.100454
ENSG00000130758	MAP3K10	11.3481	1.29173	0.574585	2.24812	0.0245686	0.100601
ENSG00000103591	AAGAB	278.936	0.256329	0.114028	2.24796	0.024579	0.100601
ENSG00000239467	AC007405.6	7.56391	1.33481	0.59392	2.24747	0.0246103	0.100653
ENSG00000160075	SSU72	416.397	0.258131	0.114856	2.24742	0.024613	0.100653
ENSG00000114127	XRN1	124.587	0.349108	0.155342	2.24735	0.0246178	0.100653
ENSG00000204435	CSNK2B	424.05	0.264543	0.117717	2.24727	0.0246229	0.100653
ENSG00000176153	GPX2	952.582	0.252369	0.112358	2.24611	0.0246972	0.100924
ENSG00000164010	ERMAP	10.9826	1.02492	0.456488	2.24522	0.0247542	0.101033
ENSG00000077312	SNRPA	370.938	0.300728	0.133942	2.2452	0.0247551	0.101033
ENSG00000188846	RPL14	3097.42	0.180914	0.0805888	2.24491	0.024774	0.101078
ENSG00000175482	POLD4	47.8715	0.539935	0.240592	2.24419	0.0248201	0.10117
ENSG00000171560	FGA	966.434	0.325168	0.144951	2.2433	0.0248774	0.10134
ENSG00000099834	CDHR5	11.5942	0.984563	0.439144	2.242	0.0249611	0.101617
ENSG00000111700	SLCO1B3	3.31582	1.93307	0.862627	2.24091	0.0250317	0.101872
ENSG00000110274	CEP164	125.21	0.339949	0.151877	2.23833	0.0251998	0.102496
ENSG00000266258	RP11-41O4.1	15.853	0.887087	0.39632	2.23831	0.025201	0.102496
ENSG00000256223	ZNF10	16.678	0.868066	0.387944	2.23761	0.0252466	0.102617
ENSG00000163126	ANKRD23	4.35268	2.88795	1.29241	2.23455	0.0254469	0.103316
ENSG00000034713	GABARAPL2	256.451	0.296327	0.132615	2.2345	0.0254505	0.103316
ENSG00000159110	IFNAR2	141.527	0.385253	0.172459	2.23388	0.0254907	0.103417
ENSG00000130813	C19orf66	74.649	0.444689	0.199128	2.23318	0.0255371	0.103537
ENSG00000105732	ZNF574	46.027	0.569424	0.255033	2.23275	0.0255656	0.103587
ENSG00000198060	MARCH5	255.651	0.289054	0.129475	2.2325	0.025582	0.103621
ENSG00000146233	CYP39A1	6.11976	1.65167	0.740299	2.23108	0.0256758	0.103903
ENSG00000036549	ZZZ3	244.989	0.305068	0.13679	2.2302	0.0257343	0.104075
ENSG00000104980	TIMM44	310.25	0.286009	0.128288	2.22942	0.0257861	0.104213
ENSG00000095321	CRAT	144.737	0.285277	0.128092	2.22712	0.025939	0.104706
ENSG00000160445	ZER1	32.9011	0.600691	0.269897	2.22563	0.0260389	0.10501
ENSG00000148303	RPL7A	5886.45	0.178793	0.0803494	2.2252	0.026068	0.105062
ENSG00000068878	PSME4	1166.01	0.21003	0.0944921	2.22272	0.0262346	0.105536
ENSG00000182208	MOB2	92.8983	0.43928	0.19768	2.22218	0.0262713	0.105617
ENSG00000137601	NEK1	283.467	0.241777	0.108862	2.22095	0.0263544	0.105918
ENSG00000081721	DUSP12	86.2471	0.429821	0.193619	2.21993	0.0264238	0.106164
ENSG00000067829	IDH3G	74.6482	0.408378	0.184087	2.2184	0.0265275	0.106515
ENSG00000136247	ZDHHC4	241.297	0.323517	0.145923	2.21703	0.026621	0.106857
ENSG00000171604	CXXC5	450.275	0.322272	0.145464	2.21548	0.0267273	0.107217
ENSG00000162413	KLHL21	395.801	0.241066	0.108873	2.2142	0.0268153	0.107418
ENSG00000183486	MX2	202.007	0.25395	0.114787	2.21236	0.0269421	0.107743
ENSG00000136068	FLNB	812.446	0.218265	0.0987559	2.21015	0.0270949	0.108254
ENSG00000147421	HMBOX1	86.1589	0.46803	0.211953	2.20818	0.027232	0.108709
ENSG00000130159	ECSIT	106.498	0.447157	0.202504	2.20814	0.0272342	0.108709
ENSG00000162923	WDR26	215.75	0.413659	0.187351	2.20793	0.0272489	0.108734
ENSG00000175711	B3GNTL1	44.0421	0.522987	0.236988	2.20681	0.0273275	0.10898
ENSG00000035115	SH3YL1	27.9081	0.832949	0.377715	2.20523	0.027438	0.109354
ENSG00000106804	C5	407.466	0.22212	0.100746	2.20475	0.0274717	0.109454
ENSG00000100554	ATP6V1D	304.531	0.298618	0.135532	2.2033	0.0275734	0.109825
ENSG00000078487	ZCWPW1	25.4851	0.679188	0.308317	2.20289	0.0276024	0.109878
ENSG00000133961	NUMB	336.404	0.248572	0.11285	2.20268	0.0276176	0.109878
ENSG00000231721	LINC-PINT	15.8366	1.06438	0.483229	2.20263	0.0276207	0.109878
ENSG00000091073	DTX2	88.4539	0.465525	0.211428	2.20181	0.0276788	0.110067
ENSG00000166261	ZNF202	54.5548	0.482034	0.219064	2.20042	0.0277769	0.110363
ENSG00000161326	DUSP14	217.695	0.321442	0.146101	2.20013	0.0277974	0.110411
ENSG00000073417	PDE8A	84.2643	0.435311	0.197905	2.1996	0.0278352	0.110527
ENSG00000007171	NOS2	23.799	0.644304	0.29311	2.19817	0.0279373	0.110788
ENSG00000124257	NEURL2	13.2183	1.18119	0.537376	2.19807	0.0279439	0.110788
ENSG00000127837	AAMP	1130.8	0.195469	0.0889667	2.1971	0.0280131	0.111028
ENSG00000109758	HGFAC	41.0012	0.534383	0.243302	2.19638	0.028065	0.111131
ENSG00000115661	STK16	130.875	0.305503	0.13916	2.19533	0.0281396	0.111359
ENSG00000130177	CDC16	187.074	0.284616	0.129911	2.19086	0.0284621	0.112235
ENSG00000265666	CTD-2267D19.2	5.05394	1.63935	0.749462	2.18736	0.0287159	0.113084
ENSG00000016864	GLT8D1	152.034	0.372107	0.17021	2.18616	0.0288039	0.113371
ENSG00000167799	NUDT8	147.212	0.342627	0.156728	2.18613	0.0288063	0.113371
ENSG00000246526	RP11-539L10.2	15.9353	0.787084	0.360206	2.18509	0.0288822	0.113566
ENSG00000269439	CTD-3131K8.2	5.32148	1.34291	0.614668	2.18478	0.0289053	0.113622
ENSG00000132016	C19orf57	6.35	1.25845	0.576485	2.18297	0.0290377	0.114003
ENSG00000126581	BECN1	549.442	0.204889	0.0939068	2.18183	0.0291219	0.114207
ENSG00000188706	ZDHHC9	891.697	0.225755	0.103472	2.18179	0.0291248	0.114207
ENSG00000103510	KAT8	41.2891	0.559275	0.256382	2.18141	0.0291532	0.114283
ENSG00000155506	LARP1	2590.42	0.204949	0.094012	2.18003	0.0292551	0.114613
ENSG00000188211	NCR3LG1	225.658	0.353063	0.162032	2.17897	0.0293339	0.114852
ENSG00000187775	DNAH17	75.0468	0.428236	0.196597	2.17824	0.0293879	0.114994
ENSG00000108641	B9D1	41.9761	0.473106	0.217291	2.17729	0.0294587	0.115235
ENSG00000204673	AKT1S1	88.7082	0.379825	0.174618	2.17517	0.0296173	0.11575
ENSG00000257621	RP11-349A22.5	162.006	0.296458	0.136334	2.17449	0.0296682	0.115878
ENSG00000013288	MAN2B2	117.195	0.367829	0.169175	2.17426	0.0296859	0.115878
ENSG00000002919	SNX11	100.91	0.350797	0.161418	2.17322	0.029764	0.116113
ENSG00000105325	FZR1	145.047	0.307459	0.141606	2.17122	0.0299143	0.116664
ENSG00000232533	AC093673.5	30.3472	0.571762	0.263541	2.16954	0.0300417	0.11709
ENSG00000102984	ZNF821	20.5071	0.825024	0.380397	2.16885	0.030094	0.117223
ENSG00000088280	ASAP3	42.5707	0.559928	0.25828	2.16791	0.0301655	0.117453
ENSG00000127022	CANX	8624.34	0.18686	0.0863227	2.16467	0.0304127	0.118215
ENSG00000163930	BAP1	114.557	0.321927	0.148844	2.16285	0.0305525	0.118687
ENSG00000142765	SYTL1	26.163	0.789172	0.364906	2.16267	0.0305664	0.118705
ENSG00000175634	RPS6KB2	209.41	0.302352	0.140048	2.15892	0.0308563	0.119723
ENSG00000091640	SPAG7	572.001	0.254485	0.117971	2.15718	0.0309913	0.120102
ENSG00000165406	MARCH8	119.452	0.36588	0.169783	2.15498	0.0311633	0.120659
ENSG00000142494	SLC47A1	484.158	0.194741	0.0903993	2.15423	0.031222	0.120851
ENSG00000204438	GPANK1	109.14	0.416525	0.193373	2.154	0.0312402	0.120885
ENSG00000101405	OXT	2.67689	3.02121	1.4027	2.15384	0.0312523	0.120885
ENSG00000260852	FBXL19-AS1	42.9207	0.586914	0.272507	2.15376	0.0312589	0.120885
ENSG00000147121	KRBOX4	32.4936	0.564229	0.262154	2.15228	0.0313754	0.12119
ENSG00000130363	RSPH3	39.1813	0.601251	0.279372	2.15215	0.0313855	0.121193
ENSG00000112658	SRF	679.553	0.302556	0.140671	2.1508	0.0314918	0.121447
ENSG00000175213	ZNF408	66.4682	0.490014	0.227837	2.15072	0.0314985	0.121447
ENSG00000204070	SYS1	569.245	0.277032	0.128828	2.1504	0.0315234	0.121493
ENSG00000142657	PGD	330.123	0.257829	0.119902	2.15033	0.0315292	0.121493
ENSG00000147454	SLC25A37	206.519	0.221751	0.103154	2.1497	0.0315786	0.121611
ENSG00000164543	STK17A	364.532	0.282493	0.131566	2.14715	0.0317811	0.122245
ENSG00000148572	NRBF2	154.534	0.401111	0.186907	2.14605	0.0318694	0.122511
ENSG00000115145	STAM2	141.232	0.311525	0.145172	2.1459	0.0318812	0.12252
ENSG00000117139	KDM5B	239.696	0.279979	0.130497	2.14548	0.0319142	0.122538
ENSG00000020633	RUNX3	2.61733	1.63976	0.764287	2.14548	0.0319143	0.122538
ENSG00000272661	RP4-548D19.3	14.5896	0.934007	0.435494	2.14471	0.0319764	0.122739
ENSG00000077454	LRCH4	65.3911	0.543876	0.253675	2.14399	0.0320336	0.122886
ENSG00000011304	PTBP1	1590.86	0.176115	0.0822915	2.14013	0.0323443	0.123857
ENSG00000120910	PPP3CC	39.0061	0.619149	0.28942	2.13928	0.0324132	0.124047
ENSG00000198839	ZNF277	114.732	0.395059	0.184924	2.13632	0.032653	0.12476
ENSG00000253797	UTP14C	169.157	0.292293	0.136824	2.13627	0.0326574	0.12476
ENSG00000159023	EPB41	350.383	0.234364	0.109791	2.13463	0.032791	0.125122
ENSG00000168907	PLA2G4F	2.87667	1.73463	0.813315	2.13279	0.0329416	0.125622
ENSG00000175826	CTDNEP1	1410.81	0.220858	0.103563	2.13258	0.0329589	0.12563
ENSG00000086015	MAST2	157.535	0.264106	0.123869	2.13214	0.0329955	0.125716
ENSG00000156127	BATF	21.0959	0.813202	0.38162	2.13092	0.0330958	0.126061
ENSG00000141959	PFKL	250.961	0.294019	0.138053	2.12975	0.0331924	0.12628
ENSG00000154229	PRKCA	191.506	0.219323	0.103016	2.12901	0.0332538	0.126476
ENSG00000166398	KIAA0355	150.193	0.307416	0.144531	2.12698	0.0334215	0.127002
ENSG00000105926	MPP6	94.47	0.365402	0.17201	2.12431	0.0336444	0.127698
ENSG00000196547	MAN2A2	202.452	0.271367	0.127754	2.12414	0.0336586	0.127714
ENSG00000160226	C21orf2	65.2806	0.385994	0.181742	2.12385	0.0336825	0.127737
ENSG00000170832	USP32	45.009	0.50396	0.23736	2.12319	0.0337379	0.127898
ENSG00000123411	IKZF4	48.6297	0.49214	0.231884	2.12235	0.0338079	0.128093
ENSG00000039068	CDH1	109.473	0.332132	0.156562	2.1214	0.0338878	0.128256
ENSG00000140262	TCF12	293.155	0.274765	0.129525	2.12132	0.033895	0.128256
ENSG00000018189	RUFY3	108.672	0.354815	0.167266	2.12127	0.0338995	0.128256
ENSG00000125844	RRBP1	2721.5	0.289575	0.136511	2.12125	0.0339006	0.128256
ENSG00000228288	PCAT6	6.64011	1.27716	0.602774	2.1188	0.0341074	0.128849
ENSG00000204386	NEU1	1317.02	0.188214	0.0888628	2.11803	0.0341728	0.129021
ENSG00000183696	UPP1	114.85	0.391346	0.184822	2.11742	0.034224	0.12909
ENSG00000170619	COMMD5	152.026	0.288858	0.136542	2.11553	0.0343849	0.129481
ENSG00000157557	ETS2	471.742	0.227171	0.107394	2.1153	0.0344044	0.129516
ENSG00000143067	ZNF697	83.6242	0.396019	0.187448	2.11268	0.0346282	0.130206
ENSG00000093217	XYLB	252.08	0.267231	0.12657	2.11132	0.0347445	0.130568
ENSG00000142937	RPS8	11621.1	0.15854	0.0751326	2.11013	0.034847	0.130915
ENSG00000169410	PTPN9	104.214	0.427882	0.202841	2.10944	0.0349064	0.131062
ENSG00000134825	TMEM258	906.808	0.211636	0.10037	2.10855	0.0349831	0.131205
ENSG00000160803	UBQLN4	29.7782	0.670371	0.317951	2.10841	0.0349957	0.131206
ENSG00000189143	CLDN4	987.818	0.255205	0.121074	2.10785	0.0350438	0.131285
ENSG00000115073	ACTR1B	391.193	0.201365	0.0955822	2.10672	0.0351421	0.131526
ENSG00000054267	ARID4B	794.829	0.182285	0.0865617	2.10584	0.0352181	0.131772
ENSG00000196470	SIAH1	62.8405	0.472959	0.22463	2.1055	0.0352477	0.131844
ENSG00000140332	TLE3	41.8748	0.550824	0.261794	2.10404	0.035375	0.132244
ENSG00000134324	LPIN1	285.705	0.299722	0.14253	2.10287	0.0354775	0.132498
ENSG00000144043	TEX261	449.423	0.193446	0.0920076	2.1025	0.0355093	0.132498
ENSG00000122778	KIAA1549	41.5856	0.521466	0.24824	2.10065	0.0356713	0.132966
ENSG00000109790	KLHL5	201.161	0.309143	0.147195	2.10024	0.0357082	0.133036
ENSG00000140367	UBE2Q2	178.233	0.276196	0.131574	2.09916	0.0358026	0.13334
ENSG00000223891	OSER1-AS1	7.1879	1.16235	0.553872	2.09858	0.0358535	0.13349
ENSG00000085832	EPS15	165.711	0.276182	0.1317	2.09705	0.0359888	0.133879
ENSG00000105499	PLA2G4C	18.3137	1.17211	0.558996	2.09681	0.0360104	0.13392
ENSG00000070476	ZXDC	108.098	0.334724	0.159647	2.09665	0.0360247	0.133935
ENSG00000138078	PREPL	298.593	0.211773	0.101055	2.09562	0.0361157	0.1342
ENSG00000117450	PRDX1	4566.44	0.174109	0.0830951	2.0953	0.0361444	0.1342
ENSG00000106992	AK1	59.1168	0.364664	0.174042	2.09526	0.0361478	0.1342
ENSG00000138207	RBP4	2504.13	0.151891	0.0725302	2.09418	0.0362439	0.134428
ENSG00000160712	IL6R	347.327	0.274655	0.131152	2.09416	0.0362454	0.134428
ENSG00000140830	TXNL4B	90.2675	0.374465	0.178915	2.09298	0.0363512	0.134683
ENSG00000149823	VPS51	282.254	0.260184	0.124403	2.09146	0.0364865	0.135081
ENSG00000131979	GCH1	84.1987	0.402431	0.19244	2.0912	0.0365101	0.135092
ENSG00000121680	PEX16	47.3376	0.49353	0.236059	2.09071	0.0365541	0.135163
ENSG00000181458	TMEM45A	7.25752	1.23972	0.593181	2.08996	0.0366215	0.135374
ENSG00000152520	PAN3	69.917	0.452448	0.216545	2.0894	0.0366716	0.13552
ENSG00000103335	PIEZO1	264.307	0.333736	0.159839	2.08796	0.0368017	0.135962
ENSG00000177337	DLGAP1-AS1	24.5976	0.660037	0.316227	2.08722	0.0368679	0.13608
ENSG00000167186	COQ7	46.0667	0.462432	0.221563	2.08714	0.0368755	0.13608
ENSG00000188997	KCTD21	32.4814	0.608753	0.291804	2.08617	0.0369633	0.136305
ENSG00000230590	FTX	25.6871	0.833606	0.399598	2.08611	0.0369685	0.136305
ENSG00000166971	AKTIP	23.9606	0.810039	0.388532	2.08487	0.0370807	0.136604
ENSG00000141971	MVB12A	78.7043	0.34788	0.16686	2.08487	0.0370813	0.136604
ENSG00000154035	C17orf103	6.55878	1.90653	0.915432	2.08266	0.0372822	0.137159
ENSG00000228278	ORM2	538.373	0.25305	0.121505	2.08263	0.0372851	0.137159
ENSG00000171105	INSR	1248.93	0.299895	0.144017	2.08236	0.0373098	0.13721
ENSG00000114738	MAPKAPK3	192.144	0.273988	0.1316	2.08198	0.0373446	0.137273
ENSG00000148444	COMMD3	111.227	0.377547	0.181378	2.08154	0.0373841	0.137366
ENSG00000214941	ZSWIM7	73.355	0.448586	0.216178	2.07508	0.0379792	0.139117
ENSG00000256628	ZBTB11-AS1	10.1553	1.221	0.589163	2.07243	0.0382251	0.139911
ENSG00000107854	TNKS2	85.0371	0.358571	0.173078	2.07173	0.0382906	0.140059
ENSG00000117640	MTFR1L	47.0689	0.436503	0.210742	2.07127	0.0383338	0.140177
ENSG00000157927	RADIL	1.97415	3.02082	1.4589	2.07061	0.0383952	0.140362
ENSG00000095574	IKZF5	66.8194	0.431028	0.20822	2.07006	0.0384464	0.140398
ENSG00000183741	CBX6	495.549	0.208335	0.100723	2.06838	0.0386041	0.140608
ENSG00000198856	OSTC	836.674	0.193553	0.0936098	2.06765	0.0386726	0.140817
ENSG00000166233	ARIH1	285.934	0.287416	0.13906	2.06685	0.0387484	0.140894
ENSG00000184678	HIST2H2BE	10.2674	1.12501	0.544346	2.06673	0.0387599	0.140897
ENSG00000029364	SLC39A9	243.792	0.229636	0.111133	2.06631	0.0387988	0.140971
ENSG00000077380	DYNC1I2	1503.96	0.235793	0.114129	2.06603	0.0388254	0.141014
ENSG00000070731	ST6GALNAC2	3.52398	1.62741	0.78788	2.06556	0.0388705	0.1411
ENSG00000114125	RNF7	246.35	0.26076	0.126265	2.06517	0.0389067	0.141191
ENSG00000146834	MEPCE	150.021	0.305729	0.148053	2.065	0.0389229	0.14121
ENSG00000204713	TRIM27	298.142	0.26157	0.1268	2.06285	0.0391269	0.141831
ENSG00000157259	GATAD1	275.795	0.306843	0.148816	2.06189	0.0392182	0.142042
ENSG00000143156	NME7	51.0883	0.524038	0.254265	2.06099	0.0393035	0.142231
ENSG00000154556	SORBS2	122.051	0.301399	0.146335	2.05965	0.0394322	0.142657
ENSG00000271912	RP11-661A12.14	12.3157	0.822266	0.399267	2.05944	0.0394522	0.142689
ENSG00000073605	GSDMB	6.10865	1.55141	0.753789	2.05815	0.0395756	0.143015
ENSG00000169155	ZBTB43	257.635	0.276517	0.13439	2.05757	0.0396316	0.143137
ENSG00000222009	BTBD19	59.5561	0.590943	0.287435	2.05592	0.0397899	0.143669
ENSG00000125124	BBS2	39.2142	0.56483	0.274805	2.05538	0.0398422	0.143763
ENSG00000161328	LRRC56	5.4318	1.32916	0.64698	2.05441	0.0399362	0.143996
ENSG00000099204	ABLIM1	566.889	0.242728	0.118186	2.05377	0.0399976	0.144097
ENSG00000166619	BLCAP	325.912	0.252095	0.122856	2.05196	0.0401739	0.144691
ENSG00000100376	FAM118A	106.862	0.334506	0.163132	2.05053	0.0403131	0.145111
ENSG00000178078	STAP2	254.898	0.259059	0.126438	2.0489	0.0404721	0.145603
ENSG00000226328	CTA-217C2.1	16.7169	0.903609	0.44136	2.04733	0.040626	0.146034
ENSG00000198799	LRIG2	33.7361	0.583507	0.285195	2.046	0.0407569	0.146382
ENSG00000134107	BHLHE40	40.2524	0.643186	0.314397	2.04578	0.0407784	0.1464
ENSG00000157873	TNFRSF14	71.6696	0.38176	0.186643	2.0454	0.0408156	0.146471
ENSG00000133612	AGAP3	264.098	0.276442	0.135218	2.04442	0.0409123	0.146695
ENSG00000198855	FICD	77.7117	0.392615	0.192058	2.04426	0.0409282	0.146712
ENSG00000041988	THAP3	98.8198	0.408671	0.20016	2.04172	0.0411794	0.147325
ENSG00000152284	TCF7L1	17.7972	0.916208	0.448911	2.04096	0.0412551	0.147543
ENSG00000173511	VEGFB	76.5673	0.425771	0.208624	2.04085	0.0412658	0.147543
ENSG00000254470	AP5B1	115.167	0.353442	0.173191	2.04076	0.0412746	0.147543
ENSG00000272831	RP11-792A8.4	15.421	0.758377	0.371798	2.03976	0.0413747	0.147819
ENSG00000141012	GALNS	63.0507	0.532137	0.261012	2.03874	0.0414759	0.148128
ENSG00000086232	EIF2AK1	2134.51	0.209837	0.102929	2.03866	0.0414841	0.148128
ENSG00000090020	SLC9A1	158.21	0.360949	0.177075	2.0384	0.0415099	0.148179
ENSG00000078687	TNRC6C	229.678	0.298499	0.146499	2.03755	0.0415953	0.14837
ENSG00000163482	STK36	316.082	0.341851	0.167778	2.03752	0.0415978	0.14837
ENSG00000100335	MIEF1	714.796	0.198744	0.0975546	2.03726	0.0416243	0.14841
ENSG00000180210	F2	2326.69	0.231859	0.113814	2.03718	0.0416321	0.14841
ENSG00000112473	SLC39A7	460.093	0.215799	0.105973	2.03636	0.0417145	0.148484
ENSG00000198646	NCOA6	470.062	0.191526	0.0940772	2.03583	0.0417669	0.148562
ENSG00000119599	DCAF4	198.883	0.288181	0.141619	2.03491	0.0418602	0.148812
ENSG00000090316	MAEA	275.52	0.25241	0.124119	2.03362	0.0419897	0.149231
ENSG00000196498	NCOR2	323.423	0.250283	0.123267	2.03042	0.042314	0.150177
ENSG00000166922	SCG5	3.64722	1.73576	0.855389	2.0292	0.0424375	0.150491
ENSG00000099330	OCEL1	53.8282	0.376136	0.185391	2.02888	0.0424706	0.150567
ENSG00000197879	MYO1C	385.849	0.233805	0.115306	2.02768	0.0425926	0.150885
ENSG00000100802	C14orf93	35.375	0.535369	0.264047	2.02755	0.0426059	0.150885
ENSG00000196422	PPP1R26	44.1243	0.458483	0.22635	2.02555	0.042811	0.151524
ENSG00000245532	NEAT1	7631.47	0.840741	0.415144	2.02518	0.0428486	0.151616
ENSG00000106615	RHEB	143.574	0.302261	0.149284	2.02474	0.0428944	0.151694
ENSG00000078369	GNB1	1374.18	0.136719	0.0675282	2.02462	0.0429063	0.151695
ENSG00000142046	TMEM91	13.1728	0.83911	0.414609	2.02386	0.0429849	0.151931
ENSG00000083838	ZNF446	29.5209	0.635977	0.31444	2.02257	0.0431176	0.152275
ENSG00000198455	ZXDB	57.4861	0.484192	0.239445	2.02214	0.0431618	0.152306
ENSG00000137764	MAP2K5	56.5881	0.531708	0.263084	2.02106	0.0432738	0.152659
ENSG00000163913	IFT122	40.2869	0.504977	0.250033	2.01964	0.0434212	0.153044
ENSG00000105607	GCDH	72.736	0.353883	0.175225	2.01959	0.0434263	0.153044
ENSG00000186001	LRCH3	152.068	0.311611	0.154297	2.01955	0.0434302	0.153044
ENSG00000144560	VGLL4	167.335	0.333038	0.164921	2.01937	0.0434483	0.153066
ENSG00000106799	TGFBR1	98.5809	0.395074	0.195771	2.01804	0.0435875	0.153514
ENSG00000113448	PDE4D	19.9199	0.66275	0.328473	2.01767	0.0436255	0.153564
ENSG00000160679	CHTOP	360.384	0.200561	0.0994099	2.01751	0.0436418	0.15358
ENSG00000169241	SLC50A1	78.8763	0.510528	0.253092	2.01717	0.043678	0.153645
ENSG00000136059	VILL	2.8837	1.69473	0.841145	2.01479	0.0439269	0.154246
ENSG00000198431	TXNRD1	2157.14	0.305242	0.151721	2.01186	0.0442345	0.155099
ENSG00000128891	C15orf57	145.913	0.323989	0.161046	2.01178	0.0442436	0.155099
ENSG00000133247	SUV420H2	70.5631	0.511601	0.254315	2.01168	0.0442538	0.155099
ENSG00000156603	MED19	255.174	0.231821	0.115248	2.01149	0.0442737	0.155126
ENSG00000167766	ZNF83	42.892	0.494302	0.246066	2.00882	0.0445561	0.156031
ENSG00000104760	FGL1	238.27	0.225444	0.11229	2.0077	0.0446752	0.156363
ENSG00000238290	RP11-431K24.1	5.77728	1.26127	0.628737	2.00604	0.0448524	0.156813
ENSG00000104856	RELB	92.8972	0.492891	0.245862	2.00475	0.04499	0.157067
ENSG00000186298	PPP1CC	595.695	0.160052	0.0798383	2.0047	0.0449947	0.157067
ENSG00000106397	PLOD3	794.035	0.14914	0.0743988	2.00461	0.0450052	0.157067
ENSG00000118873	RAB3GAP2	313.661	0.211363	0.105441	2.00456	0.0450103	0.157067
ENSG00000138688	KIAA1109	254.746	0.26178	0.130672	2.00334	0.0451413	0.157462
ENSG00000205189	ZBTB10	114.784	0.33744	0.16846	2.00309	0.0451678	0.157489
ENSG00000118200	CAMSAP2	230.554	0.294955	0.147367	2.0015	0.0453387	0.157957
ENSG00000134317	GRHL1	79.5113	0.431612	0.215771	2.00033	0.045465	0.158354
ENSG00000132613	MTSS1L	494.752	0.260152	0.130093	1.99974	0.045528	0.158493
ENSG00000084207	GSTP1	3.12619	1.65449	0.827367	1.9997	0.0455327	0.158493
ENSG00000123091	RNF11	237.042	0.231257	0.115651	1.99962	0.0455418	0.158493
ENSG00000085741	WNT11	3.4454	2.55924	1.27999	1.99942	0.0455634	0.158526
ENSG00000169740	ZNF32	37.8473	0.488863	0.244531	1.99918	0.0455887	0.158528
ENSG00000005339	CREBBP	442.628	0.236084	0.118147	1.99822	0.0456933	0.158849
ENSG00000167378	IRGQ	138.666	0.344774	0.17257	1.99788	0.0457299	0.158925
ENSG00000118960	HS1BP3	57.6833	0.338365	0.169539	1.99579	0.0459565	0.159592
ENSG00000170632	ARMC10	53.5756	0.407631	0.204292	1.99533	0.0460064	0.159693
ENSG00000166529	ZSCAN21	27.3037	0.660222	0.331365	1.99243	0.0463235	0.160607
ENSG00000204564	C6orf136	54.666	0.403307	0.202466	1.99198	0.0463736	0.160738
ENSG00000099326	MZF1	17.5137	0.882225	0.443135	1.99087	0.0464949	0.161029
ENSG00000127993	RBM48	66.7497	0.439603	0.22105	1.98871	0.0467335	0.161724
ENSG00000152433	ZNF547	16.0547	0.941918	0.473697	1.98844	0.0467631	0.161783
ENSG00000082512	TRAF5	20.8424	0.719251	0.361899	1.98744	0.0468739	0.162111
ENSG00000183426	NPIPA1	75.0335	0.965084	0.48572	1.98692	0.0469318	0.162236
ENSG00000175592	FOSL1	132.207	0.494399	0.249089	1.98483	0.0471635	0.162907
ENSG00000117984	CTSD	1941.36	0.218581	0.11018	1.98385	0.0472724	0.163195
ENSG00000130338	TULP4	253.305	0.277094	0.139848	1.98139	0.0475472	0.163881
ENSG00000235884	LINC00941	30.1318	0.637528	0.321814	1.98104	0.0475865	0.163929
ENSG00000186868	MAPT	231.366	0.269843	0.136237	1.98069	0.0476265	0.164023
ENSG00000213672	NCKIPSD	83.4718	0.343074	0.173235	1.9804	0.0476584	0.164077
ENSG00000139266	MARCH9	46.4239	0.489322	0.247188	1.97955	0.0477537	0.164329
ENSG00000050426	LETMD1	96.7356	0.391387	0.197817	1.97853	0.0478685	0.16468
ENSG00000179335	CLK3	179.006	0.318163	0.160827	1.97829	0.0478962	0.164711
ENSG00000108582	CPD	636.583	0.154835	0.0782696	1.97823	0.047903	0.164711
ENSG00000262001	DLGAP1-AS2	15.2794	1.0207	0.516642	1.97564	0.0481958	0.165586
ENSG00000156804	FBXO32	5.74762	2.44771	1.23948	1.97479	0.0482925	0.165828
ENSG00000172725	CORO1B	151.454	0.284848	0.144251	1.97468	0.048305	0.165828
ENSG00000047932	GOPC	491.425	0.186346	0.0944017	1.97397	0.0483855	0.16606
ENSG00000185133	INPP5J	2.30714	2.41314	1.22284	1.9734	0.0484506	0.166195
ENSG00000117411	B4GALT2	596.95	0.24855	0.125987	1.97283	0.0485147	0.166371
ENSG00000012061	ERCC1	80.4208	0.328661	0.166678	1.97183	0.0486287	0.166621
ENSG00000103966	EHD4	41.9425	0.613117	0.310952	1.97174	0.0486392	0.166621
ENSG00000241973	PI4KA	79.5408	0.383789	0.194717	1.97101	0.0487233	0.16682
ENSG00000150527	CTAGE5	18.0796	0.884166	0.448694	1.97053	0.0487773	0.166878
ENSG00000100116	GCAT	52.1205	0.414709	0.21048	1.9703	0.0488036	0.166918
ENSG00000166311	SMPD1	30.7229	0.474425	0.241013	1.96846	0.0490151	0.167597
ENSG00000196981	WDR5B	25.5932	0.669979	0.340736	1.96627	0.0492675	0.168172
ENSG00000141524	TMC6	140.064	0.327434	0.166694	1.96428	0.0494976	0.168799
ENSG00000225489	RP11-390F4.3	27.0748	0.597105	0.304089	1.96359	0.0495781	0.168985
ENSG00000104067	TJP1	300.022	0.268289	0.136713	1.96242	0.0497136	0.169357
ENSG00000003402	CFLAR	583.481	0.217975	0.111107	1.96186	0.0497792	0.169536
ENSG00000198858	R3HDM4	283.385	0.266633	0.135924	1.96164	0.0498047	0.169578
ENSG00000152904	GGPS1	101.663	0.292278	0.149018	1.96135	0.0498379	0.169646
ENSG00000172500	FIBP	295.861	0.282621	0.144192	1.96003	0.049992	0.170055
ENSG00000130988	RGN	114.319	0.259891	0.132604	1.95991	0.0500067	0.170055
ENSG00000140848	CPNE2	8.14736	1.79288	0.914839	1.95978	0.0500212	0.170055
ENSG00000205517	RGL3	23.3204	0.708055	0.361297	1.95976	0.050024	0.170055
ENSG00000170653	ATF7	32.421	0.60516	0.308826	1.95955	0.0500483	0.170093
ENSG00000143384	MCL1	820.299	0.174378	0.0890306	1.95863	0.0501567	0.170416
ENSG00000109472	CPE	995.242	0.149135	0.0761689	1.95795	0.0502358	0.170589
ENSG00000250317	SMIM20	78.0887	0.49918	0.25503	1.95734	0.0503081	0.170751
ENSG00000162714	ZNF496	49.4859	0.468411	0.239695	1.9542	0.0506778	0.171735
ENSG00000073792	IGF2BP2	797.44	0.176075	0.0901563	1.953	0.0508193	0.172124
ENSG00000157426	AASDH	70.7138	0.348113	0.178315	1.95223	0.0509106	0.172252
ENSG00000186468	RPS23	2800.78	0.205399	0.105226	1.95199	0.0509399	0.172306
ENSG00000265263	RP11-135L13.4	5.02097	1.72751	0.885274	1.95139	0.0510112	0.172457
ENSG00000101577	LPIN2	265.99	0.270579	0.138731	1.95039	0.0511302	0.172678
ENSG00000051128	HOMER3	85.1042	0.377462	0.193581	1.94989	0.0511891	0.172832
ENSG00000127914	AKAP9	1725.02	0.276428	0.141783	1.94965	0.0512179	0.172883
ENSG00000160087	UBE2J2	407.6	0.196422	0.100753	1.94954	0.0512311	0.172883
ENSG00000028528	SNX1	506.322	0.231581	0.118938	1.94707	0.0515259	0.17356
ENSG00000106290	TAF6	170.132	0.272899	0.140167	1.94696	0.0515394	0.17356
ENSG00000105227	PRX	2.9749	1.97047	1.01222	1.94669	0.0515718	0.173579
ENSG00000170456	DENND5B	185.056	0.30636	0.157393	1.94646	0.0515992	0.173626
ENSG00000121879	PIK3CA	84.0382	0.372758	0.191614	1.94536	0.0517319	0.173982
ENSG00000105698	USF2	238.453	0.241266	0.124063	1.9447	0.0518107	0.17411
ENSG00000187867	PALM3	34.0047	0.592775	0.304894	1.9442	0.0518711	0.174268
ENSG00000225756	DBH-AS1	56.0232	0.483058	0.248633	1.94286	0.0520334	0.174733
ENSG00000159792	PSKH1	111.844	0.347073	0.178764	1.94151	0.0521963	0.175087
ENSG00000260196	RP1-239B22.5	170.182	0.31057	0.159976	1.94136	0.0522149	0.175104
ENSG00000099968	BCL2L13	144.117	0.365489	0.188393	1.94004	0.0523754	0.175596
ENSG00000167291	TBC1D16	267.008	0.248242	0.128031	1.93892	0.0525108	0.175959
ENSG00000030582	GRN	986.458	0.253297	0.130769	1.93698	0.0527478	0.176524
ENSG00000138032	PPM1B	163.481	0.269878	0.13936	1.93655	0.0528	0.176607
ENSG00000163932	PRKCD	55.7282	0.490101	0.253185	1.93574	0.0528998	0.176765
ENSG00000213741	RPS29	19610.9	0.16787	0.0867218	1.93573	0.0529007	0.176765
ENSG00000255874	LINC00346	2.42166	2.87331	1.48436	1.93572	0.0529021	0.176765
ENSG00000132424	PNISR	1260.1	0.235169	0.121502	1.93552	0.0529266	0.176801
ENSG00000119950	MXI1	60.3587	0.402401	0.207978	1.93482	0.0530119	0.17704
ENSG00000172007	RAB33B	28.1085	0.680686	0.351922	1.9342	0.0530889	0.177206
ENSG00000260487	RP11-297C4.3	22.9077	0.720601	0.372625	1.93385	0.0531316	0.177301
ENSG00000158186	MRAS	137.819	0.259785	0.134351	1.93363	0.0531587	0.177301
ENSG00000153721	CNKSR3	177.1	0.245483	0.127006	1.93284	0.0532554	0.177526
ENSG00000123562	MORF4L2	1402.62	0.174745	0.0904211	1.93257	0.053289	0.177538
ENSG00000095752	IL11	103.539	2.2932	1.18888	1.92886	0.0537479	0.178666
ENSG00000198142	SOWAHC	441.726	0.249236	0.129373	1.92649	0.0540434	0.179555
ENSG00000239665	RP11-295P9.3	20.144	0.882977	0.458404	1.9262	0.0540797	0.179567
ENSG00000270000	RP3-449M8.9	8.27043	1.10879	0.575644	1.92618	0.0540818	0.179567
ENSG00000126012	KDM5C	354.223	0.323204	0.167819	1.92591	0.0541156	0.179567
ENSG00000196821	C6orf106	440.091	0.269198	0.139812	1.92542	0.0541763	0.179627
ENSG00000119782	FKBP1B	109.628	0.4256	0.221102	1.92491	0.054241	0.179703
ENSG00000261087	KB-1460A1.5	1.72175	2.17987	1.1335	1.92314	0.0544622	0.18039
ENSG00000172006	ZNF554	40.2644	0.526867	0.274025	1.9227	0.0545177	0.180481
ENSG00000100083	GGA1	195.739	0.268053	0.139444	1.9223	0.0545686	0.180603
ENSG00000148399	DPH7	214.424	0.279024	0.145205	1.92158	0.0546581	0.180853
ENSG00000100300	TSPO	78.876	0.32972	0.171613	1.9213	0.0546942	0.180901
ENSG00000166348	USP54	48.5831	0.477093	0.248325	1.92125	0.0547007	0.180901
ENSG00000139697	SBNO1	1003.71	0.182408	0.0949759	1.92057	0.0547855	0.181135
ENSG00000141367	CLTC	3493.7	0.157778	0.0822392	1.91853	0.055044	0.181642
ENSG00000104695	PPP2CB	917.066	0.198872	0.103667	1.91837	0.0550642	0.181642
ENSG00000124155	PIGT	544.079	0.219048	0.114203	1.91806	0.055104	0.181642
ENSG00000123843	C4BPB	406.732	0.194085	0.10121	1.91765	0.0551556	0.181719
ENSG00000069020	MAST4	105.524	0.310358	0.161849	1.91758	0.0551647	0.181719
ENSG00000186104	CYP2R1	2.78279	2.40178	1.25255	1.91751	0.0551736	0.181719
ENSG00000206503	HLA-A	1830.2	0.179321	0.093628	1.91525	0.0554606	0.182478
ENSG00000196684	HSH2D	9.53101	0.936805	0.489337	1.91444	0.0555641	0.182679
ENSG00000220205	VAMP2	65.8437	0.514771	0.26897	1.91386	0.0556382	0.182876
ENSG00000115641	FHL2	2.6555	2.76507	1.44613	1.91204	0.0558708	0.1835
ENSG00000166455	C16orf46	7.86181	1.09748	0.574413	1.91062	0.0560534	0.183913
ENSG00000126107	HECTD3	114.071	0.350918	0.183799	1.90924	0.0562308	0.184401
ENSG00000177879	AP3S1	241.891	0.252007	0.132027	1.90876	0.0562932	0.184559
ENSG00000006327	TNFRSF12A	257.248	0.339297	0.178142	1.90464	0.0568273	0.186026
ENSG00000130449	ZSWIM6	66.6399	0.516794	0.27146	1.90376	0.0569416	0.186258
ENSG00000234996	RP11-480I12.7	7.43395	0.916024	0.481453	1.90263	0.0570894	0.186647
ENSG00000136051	KIAA1033	178.467	0.301998	0.158857	1.90107	0.0572929	0.187218
ENSG00000196557	CACNA1H	6.1698	1.78867	0.941797	1.89921	0.0575372	0.187921
ENSG00000185344	ATP6V0A2	132.899	0.322844	0.170317	1.89555	0.0580196	0.189257
ENSG00000126562	WNK4	7.19565	1.0975	0.579107	1.89516	0.0580706	0.189375
ENSG00000115091	ACTR3	632.237	0.181733	0.0959044	1.89494	0.0580999	0.189375
ENSG00000137106	GRHPR	288.325	0.210805	0.111311	1.89384	0.0582458	0.189707
ENSG00000129214	SHBG	19.0414	0.584704	0.308845	1.89319	0.0583322	0.189895
ENSG00000088356	PDRG1	359.19	0.259647	0.137148	1.89319	0.0583331	0.189895
ENSG00000179163	FUCA1	188.536	0.222035	0.117356	1.89199	0.0584925	0.190366
ENSG00000106153	CHCHD2	9859.7	0.205904	0.108942	1.89004	0.0587521	0.191018
ENSG00000139651	ZNF740	37.6611	0.459037	0.243026	1.88884	0.0589135	0.191447
ENSG00000124523	SIRT5	88.2374	0.329248	0.174336	1.88859	0.0589474	0.191457
ENSG00000126091	ST3GAL3	6.38964	1.07014	0.566666	1.88848	0.0589609	0.191457
ENSG00000025708	TYMP	45.498	0.617205	0.326902	1.88804	0.0590206	0.191602
ENSG00000179364	PACS2	79.5509	0.348645	0.184683	1.8878	0.059053	0.191659
ENSG00000165102	HGSNAT	146.176	0.312611	0.165663	1.88703	0.0591565	0.191863
ENSG00000120709	FAM53C	249.62	0.202982	0.107569	1.887	0.0591605	0.191863
ENSG00000125046	SSUH2	397.739	0.201095	0.106613	1.88621	0.0592668	0.192058
ENSG00000204406	MBD5	38.5637	0.496086	0.263009	1.88619	0.0592687	0.192058
ENSG00000143373	ZNF687	66.5226	0.472304	0.250414	1.88609	0.0592824	0.192058
ENSG00000145192	AHSG	7679.22	0.196435	0.104154	1.886	0.0592951	0.192058
ENSG00000205323	SARNP	58.0777	0.45339	0.240463	1.88549	0.0593641	0.192188
ENSG00000149600	COMMD7	245.269	0.264775	0.140479	1.88481	0.059456	0.192434
ENSG00000135953	MFSD9	162.704	0.289162	0.153443	1.88449	0.0594993	0.192526
ENSG00000136367	ZFHX2	25.5984	0.557698	0.296352	1.88188	0.0598523	0.19328
ENSG00000155085	AK9	23.2466	0.624761	0.332158	1.88092	0.0599833	0.193606
ENSG00000129749	CHRNA10	6.53857	1.358	0.722308	1.88009	0.0600962	0.193858
ENSG00000228389	AC068039.4	11.0839	1.1274	0.60015	1.87853	0.0603085	0.194413
ENSG00000125818	PSMF1	1188.57	0.158683	0.0845548	1.87668	0.0605615	0.195042
ENSG00000123395	C12orf44	271.497	0.307018	0.163598	1.87666	0.0605642	0.195042
ENSG00000112078	KCTD20	258.247	0.249018	0.13272	1.87627	0.0606189	0.195121
ENSG00000164879	CA3	4.09962	1.28517	0.685065	1.87598	0.0606579	0.195173
ENSG00000103248	MTHFSD	26.7655	0.543172	0.289593	1.87564	0.0607048	0.195179
ENSG00000125962	ARMCX5	78.4766	0.335591	0.178927	1.87558	0.0607126	0.195179
ENSG00000173221	GLRX	316.799	0.367925	0.196216	1.8751	0.0607785	0.195342
ENSG00000103326	CAPN15	436.254	0.264917	0.141332	1.87443	0.0608718	0.195593
[truncated: 10,902 more rows]

## Sheet: ISRIB_vs_DMSO
geneID	geneName	baseMean	log2FoldChange	lfcSE	stat	pvalue	padj
ENSG00000160211	G6PD	241.627	0.583006	0.141529	4.11933	3.79968e-05	0.0819387
ENSG00000105568	PPP2R1A	168.166	0.703651	0.186619	3.77052	0.000162905	0.134476
ENSG00000112658	SRF	679.553	0.515203	0.140504	3.66681	0.000245592	0.176021
ENSG00000115540	MOB4	266.925	0.52804	0.148614	3.5531	0.000380716	0.20465
ENSG00000272343	RP11-140I16.3	1.87694	4.6756	1.37621	3.39745	0.000680158	0.283056
ENSG00000159720	ATP6V0D1	204.377	0.408538	0.122389	3.33802	0.000843764	0.302372
ENSG00000165502	RPL36AL	1147.66	0.288675	0.0889869	3.24402	0.00117857	0.361996
ENSG00000129460	NGDN	596.14	0.35113	0.111007	3.16313	0.0015608	0.410456
ENSG00000147416	ATP6V1B2	539.765	0.331247	0.105097	3.15181	0.00162261	0.410456
ENSG00000197249	SERPINA1	3619.14	0.3412	0.109771	3.10829	0.00188176	0.414737
ENSG00000119392	GLE1	458.998	0.352531	0.113971	3.09316	0.00198038	0.414737
ENSG00000101193	GID8	914.49	0.366684	0.11971	3.0631	0.00219059	0.414737
ENSG00000167881	SRP68	463.081	0.301715	0.0989481	3.04922	0.00229436	0.414737
ENSG00000177105	RHOG	426.454	0.288356	0.094773	3.0426	0.00234546	0.414737
ENSG00000109332	UBE2D3	1745.34	0.233286	0.0766777	3.04243	0.00234678	0.414737
ENSG00000119414	PPP6C	322.306	0.326661	0.109373	2.98668	0.00282027	0.478741
ENSG00000172757	CFL1	2992.14	0.218569	0.0736568	2.96739	0.00300335	0.496746
ENSG00000073921	PICALM	472.701	0.299886	0.101344	2.95909	0.00308551	0.503876
ENSG00000160014	CALM3	1699.55	0.273031	0.0926776	2.94603	0.00321878	0.50557
ENSG00000127837	AAMP	1130.8	0.261918	0.0889625	2.94414	0.00323858	0.50557
ENSG00000123144	C19orf43	496.949	0.474706	0.162427	2.92258	0.00347144	0.526883
ENSG00000149488	TMC2	9.8657	3.50516	1.20417	2.91086	0.0036044	0.540702
ENSG00000173039	RELA	373.641	0.330295	0.114067	2.89563	0.00378404	0.553295
ENSG00000132471	WBP2	602.279	0.305063	0.10558	2.88939	0.0038599	0.553295
ENSG00000064666	CNN2	587.591	0.33907	0.119718	2.83223	0.00462246	0.590836
ENSG00000140264	SERF2	3119.42	0.24281	0.0857338	2.83214	0.00462375	0.590836
ENSG00000101150	TPD52L2	1493.04	0.251122	0.0894492	2.80743	0.00499391	0.590836
ENSG00000160447	PKN3	150.5	0.428303	0.152578	2.80711	0.00499877	0.590836
ENSG00000099840	IZUMO4	2.38898	3.66736	1.30684	2.80629	0.00501148	0.590836
ENSG00000164970	FAM219A	429.33	0.468208	0.166905	2.80524	0.00502798	0.590836
ENSG00000165283	STOML2	771.321	0.318553	0.113586	2.80451	0.00503931	0.590836
ENSG00000134308	YWHAQ	979.833	0.225116	0.08035	2.80169	0.00508355	0.590836
ENSG00000220205	VAMP2	65.8437	0.747705	0.26745	2.79568	0.00517907	0.596564
ENSG00000100836	PABPN1	177.622	0.496758	0.179443	2.76833	0.00563436	0.606703
ENSG00000160201	U2AF1	2869.58	0.213479	0.0772166	2.76468	0.00569788	0.606703
ENSG00000123416	TUBA1B	10250.2	0.305739	0.110966	2.75524	0.00586487	0.606703
ENSG00000143862	ARL8A	172.48	0.553318	0.201501	2.74599	0.00603295	0.606703
ENSG00000067560	RHOA	1683.13	0.183659	0.067045	2.73933	0.00615641	0.606703
ENSG00000100867	DHRS2	5347.85	0.288902	0.105662	2.7342	0.00625326	0.606703
ENSG00000006625	GGCT	648.308	0.263412	0.096785	2.72162	0.00649633	0.611746
ENSG00000112245	PTP4A1	3044.39	0.24989	0.0919678	2.71715	0.00658478	0.615581
ENSG00000142230	SAE1	776.593	0.249027	0.0918822	2.71029	0.00672243	0.617585
ENSG00000132475	H3F3B	3931.58	0.147484	0.0545161	2.70533	0.00682362	0.619941
ENSG00000154174	TOMM70A	979.009	0.267728	0.0995092	2.69048	0.00713487	0.634807
ENSG00000119801	YPEL5	201.322	0.48115	0.179143	2.68584	0.00723479	0.636292
ENSG00000102309	PIN4	466.841	0.286488	0.106837	2.68154	0.00732841	0.638809
ENSG00000156467	UQCRB	2163.57	0.177172	0.0661699	2.67753	0.00741671	0.64052
ENSG00000112655	PTK7	312.061	0.400562	0.149679	2.67615	0.00744733	0.64052
ENSG00000172830	SSH3	73.9497	0.6323	0.236562	2.67287	0.00752048	0.642528
ENSG00000065802	ASB1	175.686	0.350831	0.132069	2.65643	0.00789731	0.646816
ENSG00000170473	WIBG	63.3342	0.531711	0.20055	2.65126	0.00801916	0.646816
ENSG00000241553	ARPC4	771.17	0.262607	0.0990962	2.65002	0.00804869	0.646816
ENSG00000112306	RPS12	20818	0.272378	0.102793	2.64977	0.00805473	0.646816
ENSG00000162433	AK4	564.036	0.21897	0.0829269	2.64052	0.00827788	0.646816
ENSG00000003249	DBNDD1	125.155	0.427971	0.162119	2.63985	0.00829422	0.646816
ENSG00000130706	ADRM1	1789	0.227013	0.0860151	2.63923	0.0083095	0.646816
ENSG00000108179	PPIF	1037.01	0.215618	0.0818517	2.63425	0.00843224	0.646816
ENSG00000174307	PHLDA3	91.043	0.411714	0.156746	2.62663	0.00862355	0.646816
ENSG00000103274	NUBP1	119.468	0.443885	0.169616	2.61701	0.00887049	0.64806
ENSG00000100897	DCAF11	669.584	0.311959	0.119235	2.61635	0.00888765	0.64806
ENSG00000175287	PHYHD1	193.413	0.48691	0.186265	2.61407	0.00894694	0.648452
ENSG00000196531	NACA	2772.83	0.236126	0.0905984	2.60629	0.00915286	0.655388
ENSG00000148229	POLE3	747.019	0.280523	0.107799	2.60228	0.00926053	0.655388
ENSG00000076826	CAMSAP3	313.382	0.384318	0.148335	2.59087	0.00957337	0.668403
ENSG00000107833	NPM3	643.675	0.358922	0.139591	2.57125	0.0101333	0.668403
ENSG00000156928	MALSU1	695.002	0.243823	0.0949824	2.56703	0.0102573	0.668403
ENSG00000111540	RAB5B	105.002	0.506408	0.197352	2.56601	0.0102876	0.668403
ENSG00000167088	SNRPD1	1139.73	0.271298	0.105752	2.56542	0.010305	0.668403
ENSG00000184886	PIGW	245.316	0.239618	0.0934292	2.5647	0.0103265	0.668403
ENSG00000125818	PSMF1	1188.57	0.216854	0.0845618	2.56445	0.010334	0.668403
ENSG00000203667	COX20	573.969	0.202095	0.0788088	2.56437	0.0103363	0.668403
ENSG00000125834	STK35	420.731	0.266321	0.104164	2.55674	0.0105657	0.668403
ENSG00000198060	MARCH5	255.651	0.331142	0.129569	2.55572	0.0105968	0.668403
ENSG00000137285	TUBB2B	45.5214	1.11277	0.435426	2.55558	0.0106012	0.668403
ENSG00000125735	TNFSF14	132.271	0.572321	0.224007	2.55492	0.0106211	0.668403
ENSG00000187840	EIF4EBP1	164.667	0.430175	0.168882	2.54719	0.0108593	0.67354
ENSG00000181097	RP11-429J17.2	120.889	0.454943	0.178859	2.54358	0.0109724	0.677293
ENSG00000104824	HNRNPL	564.057	0.343236	0.135396	2.53505	0.011243	0.678347
ENSG00000169567	HINT1	5009.53	0.250841	0.0992928	2.52628	0.0115277	0.685343
ENSG00000168092	PAFAH1B2	897.929	0.201367	0.0798804	2.52085	0.0117071	0.690207
ENSG00000146963	C7orf55-LUC7L2	308.851	0.298317	0.119047	2.50588	0.0122147	0.690207
ENSG00000159885	ZNF222	18.7351	1.09368	0.437779	2.49825	0.0124806	0.690207
ENSG00000091640	SPAG7	572.001	0.294749	0.118015	2.49756	0.0125052	0.690207
ENSG00000147883	CDKN2B	8.51408	2.29765	0.921071	2.49454	0.0126119	0.690207
ENSG00000138495	COX17	744.533	0.271808	0.108969	2.49437	0.0126181	0.690207
ENSG00000099804	CDC34	746.891	0.314196	0.126085	2.49195	0.0127045	0.690207
ENSG00000105732	ZNF574	46.027	0.634368	0.255004	2.48767	0.0128582	0.690207
ENSG00000167553	TUBA1C	5875.12	0.259805	0.104483	2.48659	0.0128975	0.690207
ENSG00000137267	TUBB2A	292.522	0.427031	0.172744	2.47205	0.0134343	0.698393
ENSG00000125952	MAX	363.171	0.285656	0.115782	2.46719	0.013618	0.698393
ENSG00000169122	FAM110B	35.1738	0.633158	0.25696	2.46403	0.0137383	0.698393
ENSG00000105221	AKT2	867.654	0.354264	0.143788	2.46379	0.0137476	0.698393
ENSG00000142669	SH3BGRL3	225.563	0.401204	0.162911	2.46272	0.0137887	0.698393
ENSG00000257702	LBX2-AS1	184.16	0.529875	0.2155	2.45881	0.0139397	0.702486
ENSG00000128891	C15orf57	145.913	0.393143	0.16099	2.44203	0.014605	0.718234
ENSG00000177732	SOX12	613.744	0.203719	0.0836053	2.43668	0.0148228	0.719487
ENSG00000061273	HDAC7	402.764	0.408332	0.167597	2.43639	0.0148348	0.719487
ENSG00000167526	RPL13	4131.99	0.232066	0.0954638	2.43093	0.01506	0.721891
ENSG00000184900	SUMO3	1557.65	0.261789	0.107855	2.42723	0.0152146	0.721891
ENSG00000058453	CROCC	36.8146	0.653994	0.271383	2.40986	0.0159586	0.742701
ENSG00000244005	NFS1	206.875	0.335089	0.139402	2.40376	0.0162274	0.750357
ENSG00000075618	FSCN1	2388.29	0.186576	0.0776799	2.40186	0.0163118	0.750414
ENSG00000110700	RPS13	3884.9	0.187815	0.0782198	2.40112	0.016345	0.750414
ENSG00000239306	RBM14	131.902	0.440095	0.183776	2.39474	0.0166323	0.753027
ENSG00000104419	NDRG1	78.8734	0.561298	0.234646	2.3921	0.0167521	0.753027
ENSG00000119669	IRF2BPL	151.495	0.414683	0.173729	2.38696	0.0169885	0.755756
ENSG00000105993	DNAJB6	533.867	0.225671	0.0946919	2.38321	0.0171624	0.760867
ENSG00000167283	ATP5L	2587.58	0.300572	0.126303	2.37977	0.0173234	0.765373
ENSG00000124222	STX16	654.925	0.230899	0.0970849	2.37832	0.0173917	0.76577
ENSG00000125445	MRPS7	614.813	0.215126	0.0907405	2.37078	0.0177505	0.773491
ENSG00000145506	NKD2	1.71366	3.51481	1.48306	2.36997	0.0177894	0.773491
ENSG00000073578	SDHA	359.558	0.26413	0.11202	2.35787	0.0183801	0.788691
ENSG00000182180	MRPS16	441.361	0.221709	0.094197	2.35368	0.0185887	0.788691
ENSG00000141522	ARHGDIA	657.65	0.239384	0.101735	2.35302	0.0186215	0.788691
ENSG00000078668	VDAC3	869.671	0.241418	0.102832	2.34769	0.0188903	0.789131
ENSG00000132341	RAN	3709.22	0.170699	0.0729406	2.34025	0.0192711	0.789258
ENSG00000214078	CPNE1	1583.31	0.251715	0.107654	2.33819	0.0193775	0.7898
ENSG00000177971	IMP3	966.068	0.284099	0.121614	2.33608	0.0194872	0.7898
ENSG00000171159	C9orf16	24.7061	0.818951	0.351333	2.33098	0.0197542	0.7898
ENSG00000268816	CTD-3093M3.1	4.55369	1.71774	0.740145	2.32082	0.0202966	0.7898
ENSG00000130255	RPL36	4224.64	0.215167	0.0927302	2.32035	0.0203219	0.7898
ENSG00000169908	TM4SF1	2854.53	0.166967	0.0721465	2.31428	0.0206523	0.7898
ENSG00000126391	FRMD8	478.394	0.355332	0.153754	2.31105	0.0208302	0.7898
ENSG00000163482	STK36	316.082	0.387826	0.167824	2.31091	0.0208379	0.7898
ENSG00000180628	PCGF5	666.417	0.272615	0.118056	2.3092	0.0209325	0.7898
ENSG00000170779	CDCA4	203.007	0.295063	0.127933	2.3064	0.0210885	0.7898
ENSG00000240682	ISY1	425.176	0.307323	0.133285	2.30576	0.0211238	0.7898
ENSG00000205937	RNPS1	365.375	0.32076	0.139172	2.30478	0.021179	0.7898
ENSG00000185787	MORF4L1	1738.9	0.254188	0.11039	2.30263	0.0212996	0.7898
ENSG00000107438	PDLIM1	1207.73	0.196675	0.0854469	2.30172	0.0213507	0.7898
ENSG00000259230	CTD-2555C10.3	11.6498	1.04279	0.453145	2.30124	0.0213781	0.7898
ENSG00000131174	COX7B	669.803	0.223695	0.097331	2.29829	0.0215451	0.7898
ENSG00000185651	UBE2L3	380.867	0.237304	0.103277	2.29773	0.0215769	0.7898
ENSG00000156711	MAPK13	380.772	0.225529	0.0982489	2.29548	0.0217054	0.7898
ENSG00000099797	TECR	107.13	0.352673	0.154328	2.28522	0.0223001	0.7898
ENSG00000100316	RPL3	2391.41	0.193865	0.084845	2.28493	0.022317	0.7898
ENSG00000002834	LASP1	1972.22	0.166678	0.0730263	2.28244	0.0224637	0.7898
ENSG00000137168	PPIL1	282.85	0.273801	0.119982	2.28202	0.0224881	0.7898
ENSG00000215251	FASTKD5	742.429	0.287536	0.126205	2.27833	0.0227071	0.7898
ENSG00000166908	PIP4K2C	259.863	0.273122	0.11988	2.2783	0.0227087	0.7898
ENSG00000124422	USP22	1173.64	0.155152	0.0682405	2.2736	0.02299	0.7898
ENSG00000197798	FAM118B	81.8793	0.428291	0.188693	2.26978	0.023221	0.7898
ENSG00000242372	EIF6	2337.52	0.228456	0.100882	2.26459	0.023538	0.7898
ENSG00000158435	CNOT11	607.909	0.265006	0.117074	2.26358	0.0236002	0.7898
ENSG00000179943	FIZ1	93.7631	0.43263	0.191185	2.26289	0.0236424	0.7898
ENSG00000166847	DCTN5	223.028	0.332375	0.147167	2.25848	0.0239155	0.7898
ENSG00000143947	RPS27A	33369.1	0.260264	0.115252	2.25822	0.0239317	0.7898
ENSG00000125835	SNRPB	2687.17	0.172518	0.07648	2.25573	0.0240876	0.7898
ENSG00000039537	C6	2.11408	2.6639	1.18184	2.25404	0.0241936	0.7898
ENSG00000198478	SH3BGRL2	69.6981	0.467777	0.207586	2.25342	0.0242329	0.7898
ENSG00000100216	TOMM22	1110.79	0.205336	0.0911444	2.25286	0.0242677	0.7898
ENSG00000107672	NSMCE4A	159.417	0.331335	0.147185	2.25115	0.024376	0.7898
ENSG00000105357	MYH14	197.969	0.324484	0.144193	2.25034	0.0244274	0.7898
ENSG00000168621	GDNF	175.836	0.281381	0.125359	2.2446	0.024794	0.7898
ENSG00000053254	FOXN3	831.913	0.184809	0.082808	2.23178	0.0256294	0.802398
ENSG00000261183	RP11-532F12.5	1.94866	3.11814	1.39808	2.2303	0.0257279	0.802398
ENSG00000163161	ERCC3	273.419	0.280181	0.125889	2.22562	0.02604	0.802398
ENSG00000112759	SLC29A1	214.774	0.270737	0.121722	2.22423	0.0261327	0.802398
ENSG00000079805	DNM2	523.273	0.258865	0.116473	2.22253	0.0262473	0.802398
ENSG00000126247	CAPNS1	1016.02	0.264127	0.118889	2.22162	0.0263091	0.802398
ENSG00000057608	GDI2	1466.56	0.212461	0.0957161	2.2197	0.0264394	0.804467
ENSG00000162244	RPL29	1058.66	0.275483	0.12434	2.21556	0.026722	0.806645
ENSG00000129354	AP1M2	271.722	0.265367	0.120031	2.21082	0.0270485	0.806645
ENSG00000141759	TXNL4A	638.841	0.195367	0.088436	2.20913	0.0271653	0.806645
ENSG00000089693	MLF2	1121.75	0.326205	0.147692	2.20869	0.0271963	0.806645
ENSG00000184640	SEPT9	1699.53	0.197753	0.0895624	2.20799	0.0272447	0.806645
ENSG00000084090	STARD7	2701.82	0.18492	0.0838208	2.20614	0.0273745	0.806645
ENSG00000196230	TUBB	6573.39	0.256838	0.116458	2.20542	0.0274249	0.806645
ENSG00000149527	PLCH2	31.7498	0.983452	0.446256	2.20378	0.0275395	0.806645
ENSG00000204086	RPA4	2.12744	2.94105	1.3381	2.19793	0.027954	0.806645
ENSG00000075624	ACTB	2146.98	0.208061	0.0948049	2.19463	0.0281903	0.806645
ENSG00000033327	GAB2	106.368	0.467789	0.2132	2.19414	0.0282256	0.806645
ENSG00000113048	MRPS27	437.667	0.192715	0.0878383	2.19397	0.0282375	0.806645
ENSG00000174171	RP11-23P13.6	8.66013	1.21745	0.55502	2.19352	0.0282697	0.806645
ENSG00000157014	TATDN2	129.213	0.303242	0.138246	2.1935	0.0282713	0.806645
ENSG00000260923	AC137934.1	14.5706	1.56213	0.712201	2.19339	0.0282794	0.806645
ENSG00000173207	CKS1B	856.055	0.230479	0.105161	2.19168	0.0284027	0.806645
ENSG00000103326	CAPN15	436.254	0.30981	0.141384	2.19127	0.0284323	0.806645
ENSG00000106636	YKT6	843.074	0.212127	0.0968801	2.18958	0.0285545	0.806645
ENSG00000143977	SNRPG	1219.4	0.236981	0.108248	2.18924	0.0285796	0.806645
ENSG00000115073	ACTR1B	391.193	0.20907	0.0957441	2.18363	0.0289895	0.806645
ENSG00000169230	PRELID1	1199.88	0.199544	0.0913942	2.18334	0.0290111	0.806645
ENSG00000183597	TANGO2	120.222	0.378582	0.173489	2.18217	0.0290973	0.806645
ENSG00000125618	PAX8	16.3602	1.00238	0.459442	2.18174	0.0291284	0.806645
ENSG00000182054	IDH2	454.996	0.185492	0.0850799	2.18021	0.029242	0.806645
ENSG00000078902	TOLLIP	322.644	0.273231	0.125379	2.17924	0.0293136	0.806645
ENSG00000168066	SF1	1189	0.201215	0.0923463	2.17892	0.0293375	0.806645
ENSG00000198346	ZNF813	57.9527	0.397694	0.182626	2.17764	0.0294332	0.806645
ENSG00000124733	MEA1	546.672	0.264487	0.12161	2.17488	0.029639	0.808354
ENSG00000183077	AFMID	659.262	0.253026	0.116458	2.17269	0.0298037	0.808354
ENSG00000100280	AP1B1	478.547	0.286247	0.131813	2.17161	0.029885	0.808354
ENSG00000137309	HMGA1	1660.47	0.164072	0.0755835	2.17074	0.0299506	0.808354
ENSG00000130021	HDHD1	90.3262	0.329361	0.151973	2.16724	0.0302167	0.812136
ENSG00000144559	1941-01-01	87.2967	0.359393	0.165916	2.16611	0.0303026	0.812752
ENSG00000120437	ACAT2	1266.42	0.218411	0.100965	2.16324	0.0305229	0.815638
ENSG00000248333	CDK11B	67.4374	0.449333	0.20773	2.16306	0.0305366	0.815638
ENSG00000179222	MAGED1	377.546	0.249768	0.115627	2.16012	0.0307631	0.816613
ENSG00000079332	SAR1A	600.331	0.18878	0.0875241	2.15689	0.0310142	0.81795
ENSG00000145779	TNFAIP8	61.0279	0.389441	0.180722	2.15492	0.031168	0.81795
ENSG00000100138	NHP2L1	1198.36	0.192023	0.0893091	2.15009	0.0315478	0.822218
ENSG00000109089	CDR2L	87.7898	0.406528	0.189274	2.14782	0.0317277	0.825241
ENSG00000158864	NDUFS2	1134.96	0.293906	0.136918	2.14659	0.0318259	0.826129
ENSG00000198373	WWP2	290.982	0.263983	0.123055	2.14525	0.0319327	0.826186
ENSG00000152284	TCF7L1	17.7972	0.962271	0.449103	2.14265	0.0321409	0.826186
ENSG00000181026	AEN	630.933	0.253719	0.118483	2.14139	0.0322424	0.826186
ENSG00000140612	SEC11A	1918.99	0.203186	0.0950523	2.13763	0.0325471	0.826186
ENSG00000133112	TPT1	14257.5	0.222953	0.104427	2.13501	0.0327602	0.826186
ENSG00000101457	DNTTIP1	498.032	0.262462	0.122966	2.13442	0.032808	0.826186
ENSG00000168268	NT5DC2	493.553	0.299159	0.140606	2.12764	0.0333667	0.827545
ENSG00000082781	ITGB5	667.172	0.212439	0.0998522	2.12753	0.0333757	0.827545
ENSG00000143727	ACP1	742.11	0.182799	0.0859244	2.12744	0.0333833	0.827545
ENSG00000173113	TRMT112	2435.5	0.22944	0.107878	2.12686	0.033432	0.827545
ENSG00000160408	ST6GALNAC6	29.69	0.62224	0.292649	2.12623	0.0334841	0.827545
ENSG00000078369	GNB1	1374.18	0.14353	0.0676282	2.12233	0.0338099	0.833998
ENSG00000113384	GOLPH3	258.644	0.252621	0.11911	2.12092	0.0339289	0.834672
ENSG00000159692	CTBP1	692.633	0.155772	0.073461	2.12047	0.0339666	0.834672
ENSG00000029534	ANK1	149.245	0.446203	0.210903	2.11568	0.0343716	0.838238
ENSG00000010319	SEMA3G	34.7826	0.590937	0.279609	2.11344	0.0345628	0.838679
ENSG00000119408	NEK6	339.948	0.214186	0.101434	2.11157	0.034723	0.838679
ENSG00000132604	TERF2	187.3	0.249371	0.118236	2.1091	0.0349358	0.838679
ENSG00000138326	RPS24	13946.4	0.172455	0.0818158	2.10785	0.0350443	0.838679
ENSG00000225921	NOL7	1225.97	0.14591	0.0692236	2.10781	0.0350473	0.838679
ENSG00000198755	RPL10A	5961.69	0.175707	0.0833707	2.10754	0.0350705	0.838679
ENSG00000151552	QDPR	372.466	0.227065	0.107814	2.10608	0.0351973	0.838679
ENSG00000109103	UNC119	61.9919	0.408897	0.194175	2.10582	0.03522	0.838679
ENSG00000174374	WBSCR16	74.2779	0.38759	0.184078	2.10557	0.0352416	0.838679
ENSG00000147454	SLC25A37	206.519	0.218046	0.103559	2.10553	0.0352451	0.838679
ENSG00000185619	PCGF3	277.155	0.318511	0.151369	2.10421	0.0353603	0.838679
ENSG00000166165	CKB	539.338	0.264833	0.125969	2.10237	0.0355211	0.838679
ENSG00000027847	B4GALT7	113.666	0.371839	0.176921	2.10172	0.0355776	0.838679
ENSG00000136830	FAM129B	508.688	0.175988	0.0837564	2.10118	0.0356248	0.838679
ENSG00000125995	ROMO1	1869.01	0.200066	0.0953328	2.0986	0.035852	0.838958
ENSG00000100413	POLR3H	141.546	0.31452	0.14995	2.0975	0.0359493	0.838958
ENSG00000009844	VTA1	458.525	0.222302	0.106002	2.09715	0.0359806	0.838958
ENSG00000080823	MOK	457.184	0.323196	0.154166	2.09641	0.0360457	0.838958
ENSG00000174903	RAB1B	160.993	0.3003	0.143251	2.09632	0.0360542	0.838958
ENSG00000188352	FOCAD	117.099	0.277124	0.132223	2.09589	0.0360919	0.838958
ENSG00000177733	HNRNPA0	673.079	0.155109	0.0740618	2.09432	0.0362315	0.839178
ENSG00000165912	PACSIN3	171.326	0.299278	0.143285	2.0887	0.0367349	0.84651
ENSG00000081870	HSPB11	242.422	0.236235	0.113176	2.08733	0.0368586	0.84651
ENSG00000089159	PXN	248.375	0.270081	0.129513	2.08537	0.0370361	0.847169
ENSG00000197472	ZNF695	8.72396	1.17906	0.566201	2.08241	0.0373052	0.851813
ENSG00000125356	NDUFA1	1101.79	0.189617	0.0911109	2.08116	0.0374189	0.852899
ENSG00000022840	RNF10	502.419	0.264068	0.127173	2.07645	0.0378527	0.858406
ENSG00000114850	SSR3	2585.98	0.148597	0.0717353	2.07147	0.0383152	0.858406
ENSG00000138942	RNF185	57.7333	0.488773	0.235959	2.07144	0.038318	0.858406
ENSG00000134759	ELP2	284.175	0.224334	0.108306	2.0713	0.0383308	0.858406
ENSG00000051180	RAD51	89.7337	0.405487	0.196115	2.06759	0.0386781	0.861799
ENSG00000178741	COX5A	1147.93	0.192509	0.0933751	2.06167	0.0392387	0.861799
ENSG00000120158	RCL1	288.125	0.316259	0.153431	2.06125	0.0392789	0.861799
ENSG00000115233	PSMD14	1300.47	0.15366	0.0745959	2.0599	0.0394084	0.862581
ENSG00000131475	VPS25	316.092	0.215862	0.104814	2.05948	0.0394483	0.862581
ENSG00000101216	GMEB2	271.928	0.307799	0.149744	2.0555	0.0398311	0.865701
ENSG00000129933	MAU2	256.574	0.263573	0.128279	2.05468	0.0399098	0.865701
ENSG00000124074	ENKD1	55.0446	0.463551	0.225626	2.05451	0.0399265	0.865701
ENSG00000167513	CDT1	245.806	0.258909	0.126391	2.04848	0.0405132	0.868263
ENSG00000146535	GNA12	708.198	0.152676	0.0745322	2.04846	0.0405149	0.868263
ENSG00000112118	MCM3	452.603	0.21444	0.104796	2.04627	0.04073	0.868263
ENSG00000117318	ID3	284.68	0.289844	0.141699	2.04549	0.0408062	0.868263
ENSG00000086619	ERO1LB	71.6753	0.606853	0.296888	2.04405	0.0409487	0.868263
ENSG00000007520	TSR3	261.17	0.285827	0.139958	2.04224	0.0411278	0.868263
ENSG00000163913	IFT122	40.2869	0.511873	0.250748	2.04139	0.0412122	0.868263
ENSG00000008710	PKD1	198.201	0.374395	0.183507	2.04023	0.0413276	0.868263
ENSG00000239789	MRPS17	104.049	0.292268	0.143293	2.03966	0.0413844	0.868263
ENSG00000103202	NME4	211.611	0.251606	0.123361	2.03959	0.0413907	0.868263
ENSG00000115661	STK16	130.875	0.284296	0.13965	2.03577	0.0417733	0.874358
ENSG00000135631	RAB11FIP5	213.242	0.290393	0.142676	2.03534	0.0418168	0.874358
ENSG00000130818	ZNF426	35.0806	0.60144	0.295604	2.03461	0.0418899	0.874468
ENSG00000100804	PSMB5	1376.22	0.201632	0.0991875	2.03283	0.0420695	0.875385
ENSG00000170855	TRIAP1	638	0.207487	0.102169	2.03082	0.0422728	0.876787
ENSG00000140740	UQCRC2	752.454	0.183824	0.0905555	2.02996	0.0423604	0.877133
ENSG00000164045	CDC25A	223.244	0.242726	0.119723	2.02739	0.0426222	0.87979
ENSG00000167549	CORO6	9.28948	1.27279	0.630195	2.01968	0.0434171	0.881184
ENSG00000104131	EIF3J	1731.12	0.189858	0.0940358	2.019	0.0434877	0.881184
ENSG00000088888	MAVS	268.472	0.201935	0.100062	2.01811	0.0435801	0.881184
ENSG00000113552	GNPDA1	717.515	0.224807	0.111413	2.01778	0.043614	0.881184
ENSG00000163528	CHCHD4	132.935	0.282996	0.140254	2.01774	0.0436184	0.881184
ENSG00000137106	GRHPR	288.325	0.224922	0.111475	2.01769	0.0436231	0.881184
ENSG00000120053	GOT1	792.46	0.19966	0.0989852	2.01707	0.0436886	0.881184
ENSG00000167515	TRAPPC2L	308.601	0.246007	0.122018	2.01615	0.0437844	0.881184
ENSG00000170542	SERPINB9	59.9708	0.46295	0.229671	2.01571	0.0438307	0.881184
ENSG00000116957	TBCE	142.731	0.292019	0.14489	2.01544	0.0438581	0.881184
ENSG00000168159	RNF187	460.574	0.24703	0.122587	2.01514	0.0438898	0.881184
ENSG00000174007	CEP19	8.10868	1.0858	0.538981	2.01454	0.0439528	0.881184
ENSG00000198498	TMA16	395.313	0.194532	0.0965681	2.01446	0.0439615	0.881184
ENSG00000133195	SLC39A11	97.458	0.346811	0.172279	2.01308	0.0441063	0.881184
ENSG00000141576	RNF157	266.405	0.241837	0.120194	2.01206	0.0442132	0.881184
ENSG00000104881	PPP1R13L	55.6245	0.480262	0.238768	2.01142	0.0442815	0.881184
ENSG00000235899	RP11-345L23.1	15.4475	1.75318	0.872062	2.01039	0.0443904	0.881184
ENSG00000186866	POFUT2	111.919	0.380404	0.189439	2.00806	0.0446368	0.881184
ENSG00000273237	CTB-119C2.1	3.82736	2.126	1.05945	2.0067	0.0447818	0.881184
ENSG00000102034	ELF4	192.631	0.423377	0.211206	2.00457	0.0450094	0.881184
ENSG00000197728	RPS26	342.044	0.263443	0.131436	2.00435	0.0450328	0.881184
ENSG00000011451	WIZ	237.759	0.295177	0.147298	2.00394	0.0450762	0.881184
ENSG00000185033	SEMA4B	62.8562	0.466198	0.232844	2.00219	0.045264	0.881184
ENSG00000272831	RP11-792A8.4	15.421	0.746113	0.372854	2.00109	0.0453831	0.881184
ENSG00000152256	PDK1	75.7754	0.376759	0.188299	2.00085	0.0454083	0.881184
ENSG00000104529	EEF1D	2223.83	0.247977	0.123943	2.00073	0.0454218	0.881184
ENSG00000128335	APOL2	71.4747	0.405827	0.203119	1.99798	0.0457188	0.883545
ENSG00000142676	RPL11	6119.08	0.142231	0.0712339	1.99667	0.045861	0.883545
ENSG00000108828	VAT1	768.345	0.188375	0.0943574	1.9964	0.0458906	0.883545
ENSG00000169221	TBC1D10B	77.0024	0.382271	0.191557	1.99559	0.0459781	0.883545
ENSG00000091527	CDV3	1704.65	0.201372	0.101061	1.99257	0.0463081	0.883545
ENSG00000164919	COX6C	1531.53	0.196275	0.0985161	1.99231	0.0463368	0.883545
ENSG00000173786	CNP	633.168	0.18372	0.0922708	1.9911	0.04647	0.883545
ENSG00000137409	MTCH1	768.291	0.225708	0.113428	1.98989	0.0466034	0.883545
ENSG00000178585	CTNNBIP1	305.156	0.253432	0.127487	1.9879	0.046823	0.883545
ENSG00000196323	ZBTB44	265.079	0.231593	0.116589	1.9864	0.0469889	0.883545
ENSG00000152102	FAM168B	463.659	0.182635	0.0920341	1.98443	0.0472078	0.883545
ENSG00000258944	RP4-647C14.3	12.1539	0.9098	0.458565	1.98401	0.0472544	0.883545
ENSG00000196655	TRAPPC4	518.541	0.264247	0.133261	1.98293	0.0473756	0.883545
ENSG00000071082	RPL31	8426.9	0.153176	0.0772487	1.98289	0.0473795	0.883545
ENSG00000168765	GSTM4	154.468	0.28735	0.145054	1.98098	0.0475931	0.883545
ENSG00000248461	CTD-2207A17.1	5.28763	1.22817	0.6201	1.9806	0.0476362	0.883545
ENSG00000111639	MRPL51	844.207	0.195603	0.0990824	1.97415	0.0483649	0.889698
ENSG00000063587	ZNF275	84.6257	0.361962	0.183367	1.97397	0.0483853	0.889698
ENSG00000168101	NUDT16L1	245.374	0.217397	0.110191	1.97292	0.0485046	0.889698
ENSG00000116661	FBXO2	593.236	0.229333	0.116269	1.97244	0.0485598	0.889698
ENSG00000164920	OSR2	38.9847	0.471102	0.239252	1.96906	0.0489457	0.891771
ENSG00000090372	STRN4	127.717	0.382985	0.194555	1.96851	0.049009	0.891771
ENSG00000101945	SUV39H1	30.8439	0.537016	0.273189	1.96573	0.04933	0.896348
ENSG00000130770	ATPIF1	719.495	0.164099	0.0835904	1.96313	0.0496306	0.899276
ENSG00000170653	ATF7	32.421	0.606626	0.309623	1.95924	0.0500846	0.90133
ENSG00000101444	AHCY	1042.66	0.167168	0.0854104	1.95723	0.05032	0.902891
ENSG00000108961	RANGRF	164.109	0.267624	0.136894	1.95497	0.0505862	0.904553
ENSG00000244509	APOBEC3C	167.587	0.296344	0.151634	1.95434	0.0506606	0.904553
ENSG00000154370	TRIM11	562.405	0.297259	0.152392	1.95063	0.0511016	0.906186
ENSG00000124571	XPO5	333.281	0.202388	0.103776	1.95024	0.0511473	0.906186
ENSG00000112972	HMGCS1	1386.05	0.185869	0.0953474	1.94939	0.0512486	0.906186
ENSG00000139289	PHLDA1	823.68	0.163107	0.0837342	1.94791	0.0514259	0.906186
ENSG00000254389	RHPN1-AS1	3.75841	1.40967	0.723875	1.9474	0.0514871	0.906186
ENSG00000161202	DVL3	438.684	0.186307	0.0957756	1.94525	0.051745	0.907801
ENSG00000074071	MRPS34	589.099	0.193816	0.0997581	1.94286	0.0520336	0.908369
ENSG00000171863	RPS7	6617.6	0.185976	0.0958762	1.93975	0.0524102	0.911849
ENSG00000170515	PA2G4	2057.32	0.202249	0.104298	1.93914	0.0524848	0.911849
ENSG00000163126	ANKRD23	4.35268	2.55894	1.3198	1.93888	0.0525156	0.911849
ENSG00000197043	ANXA6	410.58	0.230993	0.119337	1.93563	0.0529131	0.913916
ENSG00000160075	SSU72	416.397	0.222783	0.115098	1.93559	0.052918	0.913916
ENSG00000119718	EIF2B2	190.2	0.290041	0.149945	1.93432	0.053074	0.915385
ENSG00000236609	ZNF853	69.0143	0.479062	0.247787	1.93336	0.0531916	0.916032
ENSG00000178035	IMPDH2	540.37	0.226995	0.117447	1.93274	0.0532683	0.916032
ENSG00000198088	NUP62CL	4.02203	1.44924	0.750107	1.93204	0.0533542	0.916032
ENSG00000157927	RADIL	1.97415	2.85536	1.47902	1.93058	0.0535354	0.916032
ENSG00000141101	NOB1	615.977	0.18045	0.0934985	1.92998	0.0536095	0.916032
ENSG00000149806	FAU	5220.05	0.166031	0.0861053	1.92824	0.0538256	0.916032
ENSG00000184182	UBE2F	265.249	0.259812	0.134806	1.9273	0.0539417	0.916032
ENSG00000140718	FTO	139.206	0.335559	0.17436	1.92452	0.0542895	0.916032
ENSG00000264364	DYNLL2	667.063	0.160474	0.0834496	1.923	0.0544802	0.916032
ENSG00000115541	HSPE1	5083.29	0.15512	0.0806695	1.9229	0.054492	0.916032
ENSG00000272715	RP4-753F5.1	1.55602	2.52296	1.31225	1.92262	0.0545278	0.916032
ENSG00000168411	RFWD3	247.979	0.230074	0.119753	1.92125	0.0547006	0.916032
ENSG00000114982	KANSL3	472.971	0.224625	0.117009	1.91973	0.0548924	0.916032
ENSG00000105254	TBCB	858.9	0.193821	0.101026	1.91853	0.0550434	0.916032
ENSG00000101224	CDC25B	430.778	0.207378	0.108142	1.91764	0.0551566	0.916032
ENSG00000189067	LITAF	973.265	0.186468	0.0972634	1.91714	0.0552197	0.916032
ENSG00000023191	RNH1	331.188	0.216174	0.112786	1.91668	0.0552785	0.916032
ENSG00000163257	DCAF16	177.003	0.242552	0.126575	1.91627	0.0553304	0.916032
ENSG00000117450	PRDX1	4566.44	0.159274	0.0831222	1.91614	0.0553471	0.916032
ENSG00000122557	HERPUD2	122.777	0.358901	0.187445	1.9147	0.0555307	0.916032
ENSG00000099995	SF3A1	457.815	0.185115	0.0967702	1.91294	0.0557561	0.916209
ENSG00000143093	STRIP1	265.876	0.218166	0.114136	1.91145	0.0559463	0.917107
ENSG00000005007	UPF1	494.528	0.184733	0.096772	1.90896	0.0562677	0.919091
ENSG00000167384	ZNF180	20.4143	0.613103	0.321357	1.90786	0.0564099	0.919091
ENSG00000124193	SRSF6	998.477	0.196228	0.102884	1.90727	0.0564857	0.919091
ENSG00000113732	ATP6V0E1	1125.83	0.145706	0.0764929	1.90483	0.0568025	0.919091
ENSG00000159166	LAD1	437.051	0.219766	0.115769	1.89832	0.0576544	0.923974
ENSG00000124006	OBSL1	246.142	0.224381	0.11867	1.89079	0.0586524	0.927769
ENSG00000067082	KLF6	821.611	0.231143	0.122273	1.89038	0.0587072	0.927769
ENSG00000167658	EEF2	10919.7	0.174353	0.092276	1.88947	0.0588289	0.927769
ENSG00000075914	EXOSC7	179.967	0.271263	0.143756	1.88697	0.0591648	0.927769
ENSG00000166123	GPT2	910.343	0.241223	0.127849	1.88679	0.0591884	0.927769
ENSG00000074266	EED	164.133	0.250907	0.132994	1.88661	0.0592134	0.927769
ENSG00000100412	ACO2	444.311	0.201554	0.106843	1.88644	0.0592359	0.927769
ENSG00000136930	PSMB7	1466.5	0.207095	0.109847	1.88531	0.0593874	0.927769
ENSG00000175193	PARL	388.457	0.213045	0.113006	1.88526	0.0593954	0.927769
ENSG00000203879	GDI1	100.092	0.363505	0.192825	1.88515	0.0594092	0.927769
ENSG00000141198	TOM1L1	129.486	0.330082	0.175097	1.88514	0.059411	0.927769
ENSG00000111667	USP5	218.538	0.277649	0.1473	1.88492	0.0594407	0.927769
ENSG00000268836	LA16c-OS12.2	6.19981	1.25343	0.666183	1.88151	0.0599024	0.927769
ENSG00000164032	H2AFZ	2573.91	0.174102	0.0926029	1.88009	0.0600952	0.927769
ENSG00000135048	TMEM2	915.6	0.266676	0.141848	1.88002	0.0601051	0.927769
ENSG00000167325	RRM1	1244.39	0.195889	0.104228	1.87943	0.0601853	0.927769
ENSG00000187147	RNF220	415.111	0.209769	0.111622	1.87927	0.0602072	0.927769
ENSG00000166167	BTRC	93.4171	0.337118	0.179421	1.87892	0.0602551	0.927769
ENSG00000102900	NUP93	354.428	0.31981	0.170265	1.8783	0.0603396	0.927769
ENSG00000161714	PLCD3	113.9	0.332502	0.177158	1.87686	0.0605368	0.927769
ENSG00000100220	RTCB	404.222	0.185624	0.0990095	1.87481	0.0608188	0.927769
ENSG00000142541	RPL13A	9911.07	0.171847	0.091694	1.87414	0.0609112	0.927769
ENSG00000103187	COTL1	3.84517	1.62567	0.867948	1.87301	0.0610673	0.927769
ENSG00000144566	RAB5A	249.296	0.286092	0.15286	1.87159	0.0612637	0.927769
ENSG00000198612	COPS8	302.046	0.182443	0.0975212	1.8708	0.0613723	0.927769
ENSG00000131795	RBM8A	618.954	0.147289	0.0787522	1.87028	0.0614452	0.927769
ENSG00000179979	CRIPAK	41.6824	0.58029	0.310297	1.87011	0.0614688	0.927769
ENSG00000049759	NEDD4L	696.226	0.17883	0.0956682	1.86928	0.0615843	0.927769
ENSG00000025772	TOMM34	443.685	0.178989	0.095773	1.86889	0.0616383	0.927769
ENSG00000108774	RAB5C	637.095	0.229842	0.123005	1.86855	0.0616858	0.927769
ENSG00000159377	PSMB4	1073.7	0.162495	0.0869781	1.86822	0.0617309	0.927769
ENSG00000085831	TTC39A	27.6763	0.678061	0.363071	1.86757	0.0618217	0.927769
ENSG00000117408	IPO13	75.091	0.329528	0.176651	1.86541	0.0621238	0.927769
ENSG00000186222	BLOC1S4	114.253	0.267372	0.143338	1.86532	0.062136	0.927769
ENSG00000184209	SNRNP35	69.9552	0.401552	0.215378	1.8644	0.0622652	0.927769
ENSG00000266258	RP11-41O4.1	15.853	0.747112	0.400837	1.86388	0.0623388	0.927769
ENSG00000171960	PPIH	198.307	0.27008	0.144909	1.86378	0.0623521	0.927769
ENSG00000124164	VAPB	506.135	0.160037	0.0859276	1.86246	0.0625381	0.927769
ENSG00000109881	CCDC34	649.63	0.172112	0.0924648	1.86138	0.0626903	0.927769
ENSG00000126351	THRA	101.748	0.326461	0.175628	1.85882	0.0630527	0.927769
ENSG00000167797	CDK2AP2	998.199	0.259597	0.139734	1.85779	0.0631992	0.927769
ENSG00000176532	PRR15	106.871	0.282786	0.152505	1.85427	0.0637001	0.927769
ENSG00000184787	UBE2G2	398.124	0.214112	0.115472	1.85424	0.0637053	0.927769
ENSG00000173801	JUP	193.196	0.298628	0.161075	1.85396	0.0637447	0.927769
ENSG00000127838	PNKD	506.812	0.140692	0.0759118	1.85336	0.0638305	0.927769
ENSG00000166411	IDH3A	206.576	0.258255	0.13936	1.85316	0.0638601	0.927769
ENSG00000272183	RP11-523H20.3	5.9378	1.03216	0.557191	1.85244	0.0639625	0.928212
ENSG00000120314	WDR55	188.307	0.250981	0.135538	1.85174	0.0640637	0.928636
ENSG00000171206	TRIM8	106.695	0.315643	0.170739	1.84868	0.0645035	0.930261
ENSG00000125962	ARMCX5	78.4766	0.331994	0.179636	1.84815	0.0645812	0.930261
ENSG00000184967	NOC4L	53.0063	0.403624	0.218435	1.8478	0.0646318	0.930261
ENSG00000206052	DOK6	180.06	0.262753	0.142269	1.84688	0.0647651	0.930261
ENSG00000138069	RAB1A	1363.06	0.166729	0.0903105	1.84618	0.0648666	0.930261
ENSG00000185236	RAB11B	423.189	0.273427	0.148212	1.84483	0.0650617	0.930261
ENSG00000130414	NDUFA10	514.664	0.189143	0.102562	1.84419	0.0651562	0.930261
ENSG00000187778	MCRS1	616.136	0.237593	0.128841	1.84408	0.0651718	0.930261
ENSG00000154723	ATP5J	952.194	0.184383	0.0999918	1.84399	0.0651853	0.930261
ENSG00000167565	SERTAD3	5.52764	1.13923	0.618053	1.84326	0.0652911	0.930741
ENSG00000110851	PRDM4	156.133	0.287576	0.156369	1.83908	0.065903	0.936359
ENSG00000086544	ITPKC	99.3995	0.352338	0.19159	1.83902	0.0659129	0.936359
ENSG00000173418	NAA20	482.021	0.19807	0.107707	1.83897	0.0659198	0.936359
ENSG00000272405	RP11-284F21.10	145.445	0.338457	0.18411	1.83834	0.0660129	0.936359
ENSG00000067829	IDH3G	74.6482	0.340596	0.185359	1.83749	0.0661373	0.936475
ENSG00000147400	CETN2	215.747	0.219642	0.119768	1.8339	0.0666688	0.94177
ENSG00000127774	EMC6	830.382	0.191007	0.104255	1.83212	0.0669333	0.94177
ENSG00000160691	SHC1	145.903	0.286819	0.156617	1.83133	0.0670509	0.94177
ENSG00000135390	ATP5G2	1171.3	0.170267	0.0930545	1.82975	0.0672868	0.942527
ENSG00000162604	TM2D1	281.613	0.253093	0.138451	1.82803	0.0675444	0.944084
ENSG00000196683	TOMM7	1495.84	0.170844	0.0935395	1.82644	0.067784	0.945814
ENSG00000106400	ZNHIT1	127.211	0.243313	0.133407	1.82384	0.0681759	0.948799
ENSG00000074964	ARHGEF10L	367.98	0.254675	0.139689	1.82315	0.0682804	0.94923
ENSG00000196072	BLOC1S2	626.668	0.154559	0.0849084	1.8203	0.0687135	0.951056
ENSG00000156261	CCT8	1461.53	0.143202	0.078681	1.82004	0.0687534	0.951056
ENSG00000244041	LINC01011	2.42304	1.77032	0.974774	1.81613	0.0693501	0.951056
ENSG00000011009	LYPLA2	273.897	0.268848	0.148044	1.816	0.0693701	0.951056
ENSG00000104055	TGM5	7.03236	0.995591	0.548783	1.81418	0.0696499	0.952741
ENSG00000168653	NDUFS5	902.348	0.17417	0.0960268	1.81376	0.0697145	0.952741
ENSG00000125817	CENPB	288.861	0.27157	0.149853	1.81224	0.0699489	0.954932
ENSG00000078900	TP73	10.4841	0.787037	0.435081	1.80894	0.0704599	0.959871
ENSG00000204599	TRIM39	89.5442	0.344727	0.190613	1.80852	0.0705261	0.959871
ENSG00000126088	UROD	292.763	0.21241	0.117665	1.80521	0.0710424	0.959871
ENSG00000164402	SEPT8	191.839	0.241853	0.134069	1.80394	0.07124	0.959871
ENSG00000185201	IFITM2	396.745	0.233344	0.129459	1.80246	0.0714733	0.959871
ENSG00000185627	PSMD13	828.043	0.15341	0.0851685	1.80125	0.0716639	0.959871
ENSG00000170043	TRAPPC1	214.331	0.255623	0.14195	1.80079	0.0717353	0.959871
ENSG00000146733	PSPH	461.205	0.201653	0.112001	1.80046	0.0717878	0.959871
ENSG00000028528	SNX1	506.322	0.214177	0.119109	1.79817	0.0721501	0.959871
ENSG00000103653	CSK	174.522	0.276992	0.154067	1.79786	0.0721989	0.959871
ENSG00000168243	GNG4	146.334	0.286627	0.159452	1.79757	0.0722454	0.959871
ENSG00000213015	ZNF580	29.8347	0.479492	0.266746	1.79756	0.0722471	0.959871
ENSG00000116918	TSNAX	188.379	0.217787	0.121181	1.79721	0.0723027	0.959871
ENSG00000075785	RAB7A	1035.48	0.175889	0.0978753	1.79707	0.0723248	0.959871
ENSG00000163975	MFI2	61.7709	0.412014	0.229379	1.79621	0.0724605	0.959871
ENSG00000054116	TRAPPC3	526.287	0.209847	0.11689	1.79526	0.0726129	0.959871
ENSG00000168067	MAP4K2	21.6413	0.493931	0.275486	1.79295	0.0729812	0.959871
ENSG00000101079	NDRG3	301.789	0.211618	0.118101	1.79184	0.0731589	0.959871
ENSG00000204946	ZNF783	41.8451	0.551891	0.308113	1.79119	0.0732621	0.959871
ENSG00000188846	RPL14	3097.42	0.144366	0.0806444	1.79016	0.0734289	0.960534
ENSG00000167136	ENDOG	83.3169	0.339237	0.189677	1.7885	0.0736952	0.960534
ENSG00000116954	RRAGC	450.249	0.183322	0.102505	1.78841	0.0737097	0.960534
ENSG00000115350	POLE4	456.44	0.214554	0.120045	1.78728	0.0738918	0.961094
ENSG00000204389	HSPA1A	14063.6	0.220304	0.123266	1.78722	0.0739017	0.961094
ENSG00000168496	FEN1	673.983	0.149842	0.0839228	1.78547	0.0741846	0.96225
ENSG00000013810	TACC3	567.09	0.256692	0.143906	1.78375	0.0744642	0.96225
ENSG00000183421	RIPK4	47.9781	0.400537	0.224603	1.78331	0.0745361	0.96225
ENSG00000272821	CTA-384D8.36	72.6602	0.362883	0.203669	1.78173	0.0747933	0.962936
ENSG00000254986	DPP3	231.863	0.185905	0.104365	1.78129	0.0748643	0.962936
ENSG00000103591	AAGAB	278.936	0.203917	0.114514	1.78072	0.0749587	0.963148
ENSG00000224032	EPB41L4A-AS1	478.383	0.212698	0.119505	1.77982	0.0751048	0.963148
ENSG00000119705	SLIRP	2004.62	0.156794	0.0882561	1.77658	0.0756369	0.965431
ENSG00000213523	SRA1	138.162	0.275971	0.155349	1.77646	0.075657	0.965431
ENSG00000099341	PSMD8	884.432	0.153625	0.0866321	1.7733	0.0761784	0.966854
ENSG00000134825	TMEM258	906.808	0.178186	0.100512	1.77277	0.076266	0.966854
ENSG00000197355	UAP1L1	138.572	0.291037	0.16419	1.77256	0.0763015	0.966854
ENSG00000183283	DAZAP2	452.622	0.164701	0.0930092	1.7708	0.0765942	0.966854
ENSG00000176871	WSB2	106.352	0.266469	0.150501	1.77055	0.076636	0.966854
ENSG00000139194	RBP5	23.65	0.511702	0.289296	1.76878	0.0769304	0.966854
ENSG00000188229	TUBB4B	2113.32	0.194816	0.110164	1.76841	0.0769929	0.966854
ENSG00000091732	ZC3HC1	104.397	0.351919	0.199021	1.76825	0.0770198	0.966854
ENSG00000125686	MED1	1124.93	0.118456	0.0669952	1.76813	0.0770398	0.966854
ENSG00000163159	VPS72	245.187	0.311446	0.176309	1.76648	0.0773147	0.966854
ENSG00000179151	EDC3	104.267	0.272492	0.15438	1.76507	0.0775522	0.966854
ENSG00000132676	DAP3	505.977	0.171638	0.0974148	1.76193	0.0780811	0.966854
ENSG00000164346	NSA2	1730.35	0.183411	0.104105	1.76178	0.0781061	0.966854
ENSG00000105327	BBC3	331.858	0.31071	0.176406	1.76134	0.0781811	0.966854
ENSG00000082515	MRPL22	281.844	0.184258	0.104658	1.76057	0.078312	0.966854
ENSG00000103495	MAZ	231.102	0.293928	0.167108	1.7589	0.0785937	0.966854
ENSG00000166189	HPS6	57.5624	0.387541	0.220354	1.75871	0.0786259	0.966854
ENSG00000184428	TOP1MT	169.099	0.2519	0.143374	1.75694	0.0789274	0.966854
ENSG00000269973	RP11-95D17.1	62.4628	0.393602	0.224028	1.75693	0.0789292	0.966854
ENSG00000213463	SYNJ2BP	99.0911	0.277477	0.158008	1.75609	0.0790725	0.966854
ENSG00000122359	ANXA11	400.377	0.189132	0.107957	1.75193	0.0797863	0.966854
ENSG00000140691	ARMC5	150.506	0.31077	0.177389	1.75191	0.0797893	0.966854
ENSG00000136699	SMPD4	403.73	0.300628	0.171664	1.75126	0.0799009	0.966854
ENSG00000198840	MT-ND3	168922	0.190195	0.108631	1.75083	0.0799754	0.966854
ENSG00000100979	PLTP	21.6761	0.503258	0.287596	1.74988	0.0801392	0.966854
ENSG00000138772	ANXA3	43.2193	0.527367	0.301499	1.74915	0.0802648	0.966854
ENSG00000204308	RNF5	164.155	0.301706	0.172582	1.74819	0.0804317	0.966854
ENSG00000053372	MRTO4	563.903	0.183332	0.104882	1.74799	0.0804661	0.966854
ENSG00000137713	PPP2R1B	246.988	0.174543	0.0998983	1.74721	0.0806011	0.966854
ENSG00000131508	UBE2D2	1086.91	0.14934	0.0855627	1.74539	0.0809172	0.966854
ENSG00000127564	PKMYT1	165.808	0.223215	0.127944	1.74463	0.0810488	0.966854
ENSG00000135454	B4GALNT1	141.712	0.33427	0.191769	1.74309	0.0813177	0.966854
ENSG00000102401	ARMCX3	331.747	0.205572	0.117959	1.74275	0.0813776	0.966854
ENSG00000198794	SCAMP5	216.242	0.254894	0.146425	1.74079	0.081721	0.966854
ENSG00000130764	LRRC47	685.859	0.237035	0.136173	1.7407	0.081737	0.966854
ENSG00000188976	NOC2L	312.441	0.215735	0.124017	1.73957	0.0819351	0.966854
ENSG00000138606	SHF	46.8539	0.416365	0.239365	1.73945	0.081955	0.966854
ENSG00000165280	VCP	2197.73	0.116071	0.0667476	1.73896	0.0820417	0.966854
ENSG00000180304	OAZ2	186.576	0.232821	0.133891	1.73889	0.0820549	0.966854
ENSG00000134809	TIMM10	285.912	0.210105	0.120855	1.73849	0.0821242	0.966854
ENSG00000185252	ZNF74	17.2619	0.720034	0.414209	1.73834	0.0821514	0.966854
ENSG00000099949	LZTR1	173.132	0.267805	0.154171	1.73707	0.0823749	0.966854
ENSG00000087111	PIGS	506.31	0.151131	0.0870544	1.73605	0.082555	0.966854
ENSG00000099330	OCEL1	53.8282	0.324158	0.186739	1.73589	0.0825829	0.966854
ENSG00000127399	LRRC61	242.574	0.265352	0.153	1.73432	0.082861	0.966854
ENSG00000169021	UQCRFS1	393.596	0.164686	0.0949811	1.73388	0.0829397	0.966854
ENSG00000137802	MAPKBP1	30.896	0.522799	0.301639	1.7332	0.0830608	0.966854
ENSG00000213246	SUPT4H1	942.475	0.193646	0.11179	1.73222	0.0832336	0.966854
ENSG00000167723	TRPV3	23.8525	2.04184	1.17931	1.73139	0.0833825	0.966854
ENSG00000196418	ZNF124	40.0582	0.485571	0.28046	1.73134	0.0833915	0.966854
ENSG00000142168	SOD1	3066.33	0.0989653	0.0571714	1.73103	0.0834469	0.966854
ENSG00000101407	TTI1	355.495	0.245873	0.142046	1.73094	0.0834632	0.966854
ENSG00000101266	CSNK2A1	1299.1	0.140421	0.0811328	1.73075	0.0834957	0.966854
ENSG00000112699	GMDS	263.332	0.243219	0.140536	1.73065	0.0835144	0.966854
ENSG00000138698	RAP1GDS1	103.001	0.249155	0.14397	1.7306	0.0835223	0.966854
ENSG00000117713	ARID1A	412.246	0.248599	0.143674	1.7303	0.0835761	0.966854
ENSG00000006042	TMEM98	1053.27	0.187523	0.108398	1.72994	0.0836406	0.966854
ENSG00000169410	PTPN9	104.214	0.352356	0.20376	1.72927	0.0837613	0.966854
ENSG00000114354	TFG	832.236	0.160585	0.0928711	1.72912	0.0837875	0.966854
ENSG00000102125	TAZ	95.6503	0.258881	0.149879	1.72727	0.0841192	0.967221
ENSG00000135778	NTPCR	86.2922	0.278724	0.161478	1.72607	0.0843339	0.967836
ENSG00000167244	IGF2	5892.6	0.195179	0.113098	1.72575	0.0843927	0.967836
ENSG00000169016	E2F6	389.644	0.219785	0.127358	1.72572	0.0843977	0.967836
ENSG00000178385	PLEKHM3	5.53682	1.90131	1.10294	1.72386	0.0847328	0.96921
ENSG00000223482	NUTM2A-AS1	54.5362	0.459684	0.266668	1.72381	0.084743	0.96921
ENSG00000225177	RP11-390P2.4	17.9255	0.895313	0.520181	1.72116	0.0852226	0.970491
ENSG00000205595	AREGB	3.24411	2.47331	1.43708	1.72107	0.0852384	0.970491
ENSG00000131153	GINS2	120.378	0.253657	0.147486	1.71987	0.0854567	0.970491
ENSG00000185049	NELFA	175.17	0.208474	0.121343	1.71805	0.0857871	0.973206
ENSG00000122140	MRPS2	312.42	0.229518	0.133732	1.71625	0.0861169	0.97395
ENSG00000125877	ITPA	670.557	0.23557	0.13743	1.71411	0.0865076	0.97395
ENSG00000182224	CYB5D1	87.4118	0.25195	0.146992	1.71405	0.0865202	0.97395
ENSG00000167986	DDB1	1240.11	0.162745	0.0950161	1.71281	0.0867467	0.97395
ENSG00000181061	HIGD1A	533.383	0.172019	0.10048	1.71197	0.0869014	0.97395
ENSG00000134419	RPS15A	1463.84	0.152944	0.0894194	1.71041	0.0871896	0.97395
ENSG00000179818	PCBP1-AS1	87.8153	0.340512	0.199113	1.71015	0.0872389	0.97395
ENSG00000108578	BLMH	781.747	0.188788	0.110431	1.70955	0.0873489	0.97395
ENSG00000130590	SAMD10	77.8593	0.362988	0.212465	1.70846	0.0875513	0.97395
ENSG00000154832	CXXC1	311.695	0.229917	0.134624	1.70785	0.0876642	0.97395
ENSG00000196366	C9orf163	1.7573	2.83788	1.66218	1.70733	0.0877616	0.97395
ENSG00000140564	FURIN	491.001	0.239286	0.140205	1.70668	0.0878807	0.97395
ENSG00000259673	IQCH-AS1	9.86884	0.694825	0.407375	1.70561	0.0880799	0.974544
ENSG00000145425	RPS3A	1310.4	0.206854	0.12149	1.70264	0.0886353	0.975355
ENSG00000167770	OTUB1	276.161	0.254022	0.149211	1.70243	0.0886748	0.975355
ENSG00000162174	ASRGL1	437.214	0.179816	0.105626	1.70239	0.0886824	0.975355
ENSG00000100711	ZFYVE21	270.356	0.248332	0.145921	1.70183	0.088788	0.975685
ENSG00000102172	SMS	694.585	0.180666	0.10637	1.69846	0.0894209	0.978094
ENSG00000204387	C6orf48	917.325	0.174834	0.102955	1.69817	0.0894766	0.978094
ENSG00000131165	CHMP1A	237.64	0.216197	0.12732	1.69807	0.0894954	0.978094
ENSG00000172534	HCFC1	1160.05	0.19983	0.117703	1.69775	0.0895552	0.978094
ENSG00000175203	DCTN2	507.505	0.197709	0.116536	1.69654	0.0897836	0.978094
ENSG00000204463	BAG6	395.615	0.153596	0.0905507	1.69625	0.0898395	0.978094
ENSG00000168273	SMIM4	350.531	0.23352	0.13767	1.69623	0.0898422	0.978094
ENSG00000109919	MTCH2	1377.31	0.121026	0.0714556	1.69372	0.0903176	0.978094
ENSG00000135912	TTLL4	365.991	0.209777	0.123935	1.69264	0.0905244	0.978094
ENSG00000175662	TOM1L2	42.9189	0.457103	0.270196	1.69174	0.0906947	0.978094
ENSG00000129646	QRICH2	2.50535	1.76131	1.04136	1.69136	0.0907671	0.978094
ENSG00000111669	TPI1	1245.42	0.171177	0.101263	1.69043	0.0909459	0.978094
ENSG00000006704	GTF2IRD1	238.765	0.215149	0.127288	1.69025	0.0909793	0.978094
ENSG00000173812	EIF1	5408.4	0.105893	0.0626677	1.68976	0.0910748	0.978094
ENSG00000242485	MRPL20	478.758	0.179527	0.106266	1.68942	0.0911394	0.978094
ENSG00000144485	HES6	178.402	0.26144	0.154855	1.68829	0.0913554	0.978094
ENSG00000131788	PIAS3	19.9803	0.576449	0.341567	1.68766	0.091476	0.978094
ENSG00000055955	ITIH4	9.41878	0.779909	0.462151	1.68756	0.0914955	0.978094
ENSG00000079557	AFM	2.2172	1.52688	0.904823	1.68749	0.0915092	0.978094
ENSG00000103549	RNF40	178.535	0.23933	0.141937	1.68617	0.0917631	0.979186
ENSG00000110321	EIF4G2	4340.5	0.121287	0.071981	1.68499	0.0919906	0.980155
ENSG00000203760	CENPW	431.319	0.20229	0.120088	1.68452	0.0920818	0.980155
ENSG00000100294	MCAT	104.853	0.303286	0.180264	1.68245	0.0924808	0.981099
ENSG00000049167	ERCC8	53.2508	0.427174	0.25393	1.68226	0.0925193	0.981099
ENSG00000099899	TRMT2A	45.7386	0.357394	0.212532	1.6816	0.0926465	0.981099
ENSG00000071626	DAZAP1	1336.66	0.137289	0.0816791	1.68083	0.0927954	0.981099
ENSG00000159840	ZYX	382.748	0.235703	0.140298	1.68001	0.0929552	0.981099
ENSG00000158104	HPD	554.312	0.193823	0.115389	1.67973	0.0930104	0.981099
ENSG00000147164	SNX12	183.753	0.236309	0.140827	1.67801	0.0933454	0.981099
ENSG00000175793	SFN	1380.92	0.269601	0.160927	1.6753	0.0938748	0.981099
ENSG00000196821	C6orf106	440.091	0.234486	0.140035	1.67448	0.0940367	0.981099
ENSG00000170142	UBE2E1	367.836	0.160518	0.0959049	1.67372	0.0941864	0.981099
ENSG00000197345	MRPL21	767.713	0.185701	0.111148	1.67075	0.0947714	0.981099
ENSG00000174652	ZNF266	64.8462	0.404596	0.242225	1.67033	0.0948535	0.981099
ENSG00000100982	PCIF1	18.0574	0.604389	0.361888	1.6701	0.0948999	0.981099
ENSG00000198736	MSRB1	341.424	0.170897	0.102352	1.6697	0.0949787	0.981099
ENSG00000120896	SORBS3	82.6467	0.299752	0.17956	1.66938	0.095043	0.981099
ENSG00000108389	MTMR4	307.567	0.178894	0.107206	1.66869	0.0951782	0.981099
ENSG00000170027	YWHAG	984.468	0.176861	0.105992	1.66863	0.0951909	0.981099
ENSG00000167085	PHB	1484.06	0.176551	0.105812	1.66853	0.0952111	0.981099
ENSG00000249115	HAUS5	54.4042	0.347292	0.208252	1.66765	0.0953843	0.981099
ENSG00000204516	MICB	360.824	0.237883	0.142694	1.66708	0.0954988	0.981099
ENSG00000142657	PGD	330.123	0.200574	0.120343	1.66669	0.0955765	0.981099
ENSG00000103496	STX4	184.916	0.223368	0.134035	1.6665	0.0956146	0.981099
ENSG00000115641	FHL2	2.6555	2.47379	1.48519	1.66564	0.0957853	0.981099
ENSG00000133703	KRAS	333.017	0.167512	0.100645	1.66438	0.0960356	0.981099
ENSG00000102078	SLC25A14	62.804	0.355645	0.213967	1.66215	0.0964824	0.981099
ENSG00000198551	ZNF627	21.59	0.544665	0.327779	1.66168	0.0965761	0.981099
ENSG00000148331	ASB6	51.2618	0.471447	0.28375	1.66149	0.0966159	0.981099
ENSG00000167578	RAB4B	24.9257	0.562598	0.338805	1.66054	0.0968067	0.981099
ENSG00000177700	POLR2L	386.566	0.162737	0.0980158	1.66032	0.0968505	0.981099
ENSG00000116685	KIAA2013	548.672	0.181611	0.109399	1.66008	0.0968978	0.981099
ENSG00000182718	ANXA2	247.718	0.194798	0.117437	1.65874	0.0971675	0.981099
ENSG00000008018	PSMB1	5258.16	0.224506	0.135352	1.65868	0.0971803	0.981099
ENSG00000008130	NADK	90.9939	0.29002	0.174921	1.658	0.0973173	0.981099
ENSG00000104331	IMPAD1	569.631	0.169715	0.102373	1.65781	0.0973555	0.981099
ENSG00000112941	PAPD7	100.382	0.28862	0.174196	1.65687	0.0975455	0.981618
ENSG00000100399	CHADL	10.1125	0.878857	0.531154	1.65462	0.0980023	0.982475
ENSG00000174915	PTDSS2	124.409	0.225322	0.136184	1.65454	0.0980176	0.982475
ENSG00000115194	SLC30A3	114.074	0.348444	0.210643	1.6542	0.0980875	0.982475
ENSG00000174567	GOLT1A	103.678	0.272553	0.164924	1.6526	0.0984118	0.983611
ENSG00000136888	ATP6V1G1	1172.73	0.1315	0.0795792	1.65245	0.0984437	0.983611
ENSG00000184983	NDUFA6	883.257	0.153681	0.0930274	1.652	0.0985354	0.983611
ENSG00000025156	HSF2	260.934	0.226185	0.137042	1.65048	0.0988453	0.983611
ENSG00000172731	LRRC20	108.815	0.252404	0.152973	1.64999	0.0989446	0.983611
ENSG00000101546	RBFA	94.6214	0.297188	0.180232	1.64891	0.0991652	0.983759
ENSG00000122376	FAM35A	178.685	0.197939	0.120049	1.64883	0.0991831	0.983759
ENSG00000104872	PIH1D1	385.57	0.187054	0.113646	1.64593	0.0997788	0.985641
ENSG00000081059	TCF7	173.883	0.198059	0.120371	1.64541	0.0998848	0.985689
ENSG00000101076	HNF4A	599.308	0.173244	0.105343	1.64458	0.100057	0.985755
ENSG00000171903	CYP4F11	113.33	0.327052	0.19889	1.64439	0.100096	0.985755
ENSG00000099622	CIRBP	705.308	0.194652	0.118422	1.64371	0.100235	0.985765
ENSG00000089157	RPLP0	7442.66	0.156376	0.0952956	1.64095	0.100807	0.989733
ENSG00000167182	SP2	79.7343	0.313616	0.191248	1.63984	0.101038	0.989746
ENSG00000213672	NCKIPSD	83.4718	0.285722	0.174301	1.63924	0.101163	0.990218
ENSG00000072818	ACAP1	4.18845	1.20203	0.733874	1.63793	0.101437	0.99146
ENSG00000151500	THYN1	112.073	0.276059	0.168775	1.63566	0.10191	0.993251
ENSG00000111325	OGFOD2	75.811	0.336634	0.205824	1.63554	0.101935	0.993251
ENSG00000113761	ZNF346	122.619	0.307827	0.188302	1.63475	0.102101	0.993372
ENSG00000079974	RABL2B	127.298	0.340146	0.208129	1.6343	0.102196	0.993538
ENSG00000160256	FAM207A	174.918	0.245516	0.150419	1.63221	0.102635	0.994979
ENSG00000149636	DSN1	424.215	0.176446	0.108153	1.63144	0.102797	0.994979
ENSG00000131584	ACAP3	73.8213	0.295367	0.181139	1.63061	0.102972	0.994979
ENSG00000148303	RPL7A	5886.45	0.131039	0.080379	1.63027	0.103045	0.994979
ENSG00000242259	C22orf39	150.81	0.202026	0.123951	1.62989	0.103124	0.994979
ENSG00000125046	SSUH2	397.739	0.174028	0.106838	1.62889	0.103336	0.994979
ENSG00000184979	USP18	12.2546	0.627488	0.385279	1.62866	0.103385	0.994979
ENSG00000141738	GRB7	164.295	0.268439	0.165038	1.62653	0.103837	0.994979
ENSG00000166340	TPP1	972.088	0.20354	0.125156	1.62629	0.103888	0.994979
ENSG00000138092	CENPO	162.017	0.191621	0.117837	1.62616	0.103916	0.994979
ENSG00000054938	CHRDL2	5.04069	1.77148	1.09014	1.62501	0.104161	0.994979
ENSG00000130193	THEM6	308.386	0.189723	0.116832	1.6239	0.104397	0.994979
ENSG00000160908	ZNF394	57.0599	0.360696	0.222136	1.62376	0.104426	0.994979
ENSG00000183741	CBX6	495.549	0.164093	0.101072	1.62353	0.104477	0.994979
ENSG00000238290	RP11-431K24.1	5.77728	1.03275	0.63637	1.62287	0.104616	0.995206
ENSG00000165914	TTC7B	11.4304	0.710025	0.437593	1.62257	0.104681	0.995206
ENSG00000174100	MRPL45	729.799	0.198262	0.122314	1.62094	0.105031	0.99546
ENSG00000180822	PSMG4	177.656	0.243037	0.150038	1.61984	0.105266	0.99546
ENSG00000104897	SF3A2	87.4125	0.391974	0.242046	1.61942	0.105357	0.99546
ENSG00000106244	PDAP1	514.283	0.166673	0.102935	1.61921	0.105403	0.99546
ENSG00000167106	FAM102A	389.808	0.168988	0.104601	1.61556	0.10619	0.999955
ENSG00000157778	PSMG3	589.758	0.212741	0.131711	1.61521	0.106266	0.999955
ENSG00000156804	FBXO32	5.74762	2.04463	1.26807	1.6124	0.106876	1
ENSG00000267060	PTGES3L	3.45442	1.2679	0.786509	1.61207	0.106948	1
ENSG00000171848	RRM2	997.099	0.125383	0.0777959	1.6117	0.107028	1
ENSG00000104946	TBC1D17	74.2285	0.350299	0.217357	1.61163	0.107043	1
ENSG00000108861	DUSP3	510.932	0.132892	0.0824752	1.61129	0.107116	1
ENSG00000186350	RXRA	376.562	0.194223	0.120603	1.61043	0.107303	1
ENSG00000119403	PHF19	257.099	0.181145	0.112759	1.60648	0.108168	1
ENSG00000013288	MAN2B2	117.195	0.273325	0.170164	1.60624	0.10822	1
ENSG00000166169	POLL	89.9109	0.347929	0.216756	1.60516	0.108458	1
ENSG00000257605	RP11-680A11.5	14.2031	0.941538	0.586708	1.60478	0.108542	1
ENSG00000161958	FGF11	6.01365	1.20338	0.750039	1.60442	0.108622	1
ENSG00000265263	RP11-135L13.4	5.02097	1.44218	0.89914	1.60396	0.108724	1
ENSG00000188112	C6orf132	196.72	0.251469	0.157002	1.6017	0.109222	1
ENSG00000116212	LRRC42	303.424	0.186031	0.116203	1.60091	0.109396	1
ENSG00000181610	MRPS23	366.843	0.20582	0.128662	1.59969	0.109667	1
ENSG00000164125	FAM198B	478.54	0.144197	0.0901811	1.59897	0.109828	1
ENSG00000138107	ACTR1A	434.402	0.175011	0.109458	1.59889	0.109844	1
ENSG00000105058	FAM32A	940.403	0.167289	0.104646	1.59861	0.109908	1
ENSG00000175756	AURKAIP1	635.392	0.152163	0.0951914	1.59849	0.109933	1
ENSG00000167302	ENTHD2	294.097	0.260413	0.162945	1.59816	0.110006	1
ENSG00000130725	UBE2M	203.622	0.231072	0.144604	1.59796	0.110052	1
ENSG00000178026	FAM211B	28.2744	0.483177	0.302428	1.59766	0.110119	1
ENSG00000106290	TAF6	170.132	0.224654	0.140707	1.5966	0.110354	1
ENSG00000153904	DDAH1	229.28	0.284822	0.178404	1.5965	0.110378	1
ENSG00000105926	MPP6	94.47	0.276487	0.173353	1.59494	0.110726	1
ENSG00000067225	PKM	1348.62	0.188139	0.117974	1.59475	0.110768	1
ENSG00000113658	SMAD5	481.496	0.187038	0.117389	1.59332	0.111089	1
ENSG00000121104	FAM117A	46.1554	0.363668	0.22825	1.59329	0.111095	1
ENSG00000141577	AZI1	63.7216	0.320481	0.201152	1.59323	0.111109	1
ENSG00000101220	C20orf27	146.838	0.21326	0.133967	1.59189	0.111409	1
ENSG00000129245	FXR2	232.517	0.272361	0.171139	1.59146	0.111506	1
ENSG00000178252	WDR6	287.757	0.272568	0.1713	1.59118	0.11157	1
ENSG00000263711	RP11-169F17.1	112.504	0.289434	0.181901	1.59116	0.111574	1
ENSG00000117448	AKR1A1	472.451	0.153759	0.0966402	1.59105	0.111599	1
ENSG00000168078	PBK	151.864	0.233243	0.146714	1.58978	0.111885	1
ENSG00000152253	SPC25	134.477	0.209785	0.132002	1.58925	0.112003	1
ENSG00000118689	FOXO3	151.479	0.332954	0.209542	1.58896	0.112069	1
ENSG00000131910	NR0B2	806.773	0.162093	0.102039	1.58854	0.112165	1
ENSG00000163110	PDLIM5	614.707	0.195452	0.123051	1.58838	0.1122	1
ENSG00000176619	LMNB2	628.297	0.182251	0.114742	1.58835	0.112206	1
ENSG00000176658	MYO1D	168.509	0.224212	0.141214	1.58775	0.112343	1
ENSG00000105401	CDC37	1599.21	0.141109	0.0889421	1.58653	0.112619	1
ENSG00000223496	EXOSC6	256.785	0.211684	0.133429	1.58649	0.112629	1
ENSG00000088002	SULT2B1	1.60239	2.09755	1.32257	1.58597	0.112747	1
ENSG00000109606	DHX15	384.831	0.17454	0.110107	1.58519	0.112923	1
ENSG00000072864	NDE1	58.9619	0.329631	0.208046	1.58441	0.1131	1
ENSG00000125520	SLC2A4RG	669.735	0.213307	0.134635	1.58433	0.113118	1
ENSG00000113924	HGD	495.47	0.148596	0.0938293	1.58369	0.113264	1
ENSG00000115806	GORASP2	841.663	0.129989	0.0821413	1.5825	0.113535	1
ENSG00000141298	SSH2	115.02	0.214595	0.135622	1.5823	0.113581	1
ENSG00000155876	RRAGA	450.799	0.172564	0.109131	1.58127	0.113817	1
ENSG00000119421	NDUFA8	254.343	0.19185	0.121465	1.57947	0.114228	1
ENSG00000196357	ZNF565	8.80906	0.689212	0.436517	1.57889	0.114361	1
ENSG00000143420	ENSA	484.199	0.223737	0.141777	1.57808	0.114546	1
ENSG00000140332	TLE3	41.8748	0.418285	0.265123	1.5777	0.114635	1
ENSG00000078070	MCCC1	73.1401	0.392422	0.248787	1.57734	0.114717	1
ENSG00000242612	DECR2	158.821	0.196682	0.124698	1.57726	0.114735	1
ENSG00000213865	C8orf44	12.9374	0.598028	0.379699	1.57501	0.115255	1
ENSG00000130363	RSPH3	39.1813	0.443297	0.28188	1.57264	0.115801	1
ENSG00000259974	LINC00261	246.841	0.194394	0.123896	1.56901	0.116645	1
ENSG00000136710	CCDC115	134.356	0.272912	0.174038	1.56812	0.116854	1
ENSG00000197885	NKIRAS1	51.8067	0.34047	0.217297	1.56684	0.117152	1
ENSG00000109079	TNFAIP1	242.74	0.185758	0.118556	1.56683	0.117154	1
ENSG00000230055	CISD3	300.524	0.144056	0.09198	1.56617	0.117309	1
ENSG00000075426	FOSL2	94.7239	0.309751	0.197793	1.56603	0.117341	1
ENSG00000155368	DBI	2561.07	0.0933349	0.0596217	1.56545	0.117477	1
ENSG00000196557	CACNA1H	6.1698	1.50727	0.962899	1.56535	0.117502	1
ENSG00000204128	C2orf72	250.912	0.182979	0.116942	1.56471	0.117651	1
ENSG00000066926	FECH	76.2243	0.297849	0.190384	1.56447	0.117708	1
ENSG00000241685	ARPC1A	180.288	0.281688	0.180087	1.56417	0.117777	1
ENSG00000126107	HECTD3	114.071	0.288805	0.184655	1.56402	0.117812	1
ENSG00000129103	SUMF2	283.231	0.193851	0.124116	1.56185	0.118324	1
ENSG00000149600	COMMD7	245.269	0.219954	0.140888	1.56119	0.118478	1
ENSG00000154839	SKA1	149.461	0.251455	0.161075	1.5611	0.1185	1
ENSG00000168710	AHCYL1	1935.06	0.162436	0.104094	1.56048	0.118646	1
ENSG00000079246	XRCC5	2109.4	0.116773	0.0748492	1.56011	0.118734	1
ENSG00000074855	ANO8	170.693	0.295332	0.189421	1.55913	0.118966	1
ENSG00000128185	DGCR6L	54.9465	0.33877	0.217391	1.55835	0.119151	1
ENSG00000166529	ZSCAN21	27.3037	0.519487	0.333484	1.55776	0.119291	1
ENSG00000224877	C17orf89	623.755	0.170633	0.109635	1.55637	0.119619	1
ENSG00000214944	ARHGEF28	143.964	0.251054	0.16132	1.55625	0.119649	1
ENSG00000188243	COMMD6	386.957	0.183289	0.117916	1.55441	0.120087	1
ENSG00000135698	MPHOSPH6	469.709	0.201752	0.129862	1.55359	0.120282	1
ENSG00000182326	C1S	42.3838	0.440383	0.283551	1.5531	0.120399	1
ENSG00000048544	MRPS10	446.617	0.218127	0.140492	1.55259	0.120521	1
ENSG00000103260	METRN	22.1847	0.501819	0.323431	1.55155	0.12077	1
ENSG00000205517	RGL3	23.3204	0.566491	0.365208	1.55115	0.120866	1
ENSG00000021300	PLEKHB1	61.2349	0.314134	0.202798	1.549	0.121382	1
ENSG00000173334	TRIB1	701.856	0.183111	0.118294	1.54793	0.121639	1
ENSG00000165704	HPRT1	76.0795	0.344006	0.222373	1.54698	0.121869	1
ENSG00000174444	RPL4	2832.84	0.140245	0.0906834	1.54653	0.121976	1
ENSG00000173614	NMNAT1	50.2169	0.30469	0.197092	1.54593	0.122122	1
ENSG00000008838	MED24	954.702	0.328062	0.212242	1.5457	0.122177	1
ENSG00000034510	TMSB10	1720.28	0.155277	0.100515	1.54482	0.122391	1
ENSG00000171792	RHNO1	142.782	0.222158	0.143917	1.54366	0.122672	1
ENSG00000127445	PIN1	170.666	0.296292	0.192027	1.54297	0.122837	1
ENSG00000134575	ACP2	185.401	0.266766	0.172923	1.54268	0.122907	1
ENSG00000116459	ATP5F1	690.981	0.157018	0.101799	1.54243	0.122969	1
ENSG00000186153	WWOX	44.8214	0.326403	0.211634	1.5423	0.123002	1
ENSG00000254999	BRK1	394.484	0.157487	0.102144	1.54181	0.12312	1
ENSG00000163874	ZC3H12A	284.72	0.309859	0.200974	1.54179	0.123125	1
ENSG00000188981	MSANTD1	6.24669	0.827976	0.537886	1.53931	0.123728	1
ENSG00000055070	SZRD1	324.878	0.185473	0.120595	1.53798	0.124052	1
ENSG00000171608	PIK3CD	476.835	0.185412	0.1206	1.5374	0.124194	1
ENSG00000088826	SMOX	540.961	0.203887	0.13263	1.53726	0.124229	1
ENSG00000228265	RP5-1125A11.1	23.1941	0.583547	0.380089	1.53529	0.124713	1
ENSG00000161970	RPL26	10797.6	0.173727	0.11319	1.53483	0.124826	1
ENSG00000103264	FBXO31	404.942	0.23297	0.151903	1.53368	0.125109	1
ENSG00000130487	KLHDC7B	20.5832	2.07309	1.35276	1.53249	0.125402	1
ENSG00000171793	CTPS1	222.304	0.19638	0.128175	1.53212	0.125493	1
ENSG00000127561	SYNGR3	8.10591	1.63732	1.06883	1.53188	0.125552	1
ENSG00000123374	CDK2	311.746	0.178587	0.116675	1.53063	0.125861	1
ENSG00000108518	PFN1	887.675	0.367739	0.240273	1.5305	0.125892	1
ENSG00000151413	NUBPL	86.8296	0.23623	0.154486	1.52914	0.12623	1
ENSG00000148926	ADM	144.671	0.289175	0.189148	1.52883	0.126307	1
ENSG00000164849	GPR146	24.1901	0.656259	0.429467	1.52808	0.126493	1
ENSG00000176153	GPX2	952.582	0.171677	0.112487	1.52619	0.126962	1
ENSG00000179115	FARSA	457.504	0.164843	0.108031	1.52588	0.12704	1
ENSG00000136819	C9orf78	327.739	0.148056	0.097047	1.52561	0.127108	1
ENSG00000166508	MCM7	839.631	0.126659	0.0830437	1.52521	0.127206	1
ENSG00000081791	KIAA0141	179.191	0.237669	0.155932	1.52419	0.127462	1
ENSG00000135446	CDK4	1672.05	0.248495	0.163074	1.52382	0.127554	1
ENSG00000172667	ZMAT3	230.471	0.182861	0.120031	1.52345	0.127646	1
ENSG00000086504	MRPL28	88.4223	0.309734	0.203328	1.52332	0.127679	1
ENSG00000118162	KPTN	44.554	0.385453	0.253092	1.52298	0.127764	1
ENSG00000109062	SLC9A3R1	572.106	0.148798	0.0977237	1.52263	0.12785	1
ENSG00000260054	RP11-611L7.1	263.449	0.230522	0.151455	1.52205	0.127997	1
ENSG00000112039	FANCE	32.5823	0.476919	0.313532	1.52112	0.12823	1
ENSG00000139438	FAM222A	85.2271	0.252761	0.166239	1.52047	0.128393	1
ENSG00000180185	FAHD1	251.12	0.159805	0.10515	1.51979	0.128564	1
ENSG00000020129	NCDN	154.917	0.267407	0.176022	1.51916	0.128722	1
ENSG00000117385	LEPRE1	144.233	0.302408	0.199111	1.51879	0.128815	1
ENSG00000180902	D2HGDH	202.899	0.229049	0.150968	1.51721	0.129215	1
ENSG00000170631	ZNF16	62.8962	0.341447	0.225174	1.51637	0.129426	1
ENSG00000146909	NOM1	217.461	0.215792	0.142322	1.51623	0.129462	1
ENSG00000144451	SPAG16	144.194	0.170527	0.112527	1.51543	0.129665	1
ENSG00000107882	SUFU	29.1266	0.385671	0.25458	1.51493	0.12979	1
ENSG00000141127	PRPSAP2	90.7749	0.259797	0.171527	1.51462	0.129869	1
ENSG00000105186	ANKRD27	84.1056	0.288562	0.190577	1.51415	0.129987	1
ENSG00000099800	TIMM13	1706.55	0.184324	0.121751	1.51394	0.13004	1
ENSG00000177337	DLGAP1-AS1	24.5976	0.48485	0.320333	1.51358	0.130131	1
ENSG00000130312	MRPL34	669.759	0.228069	0.1507	1.5134	0.130177	1
ENSG00000260793	RP5-882C2.2	9.12749	0.756286	0.499774	1.51326	0.130214	1
ENSG00000145592	RPL37	8071.28	0.150588	0.0995383	1.51286	0.130314	1
ENSG00000260023	RP11-49C24.1	2.96757	1.19135	0.787916	1.51203	0.130526	1
ENSG00000004779	NDUFAB1	1029.78	0.136866	0.0905646	1.51125	0.130724	1
ENSG00000168958	MFF	501.551	0.135284	0.089535	1.51096	0.130798	1
ENSG00000113504	SLC12A7	434.114	0.221501	0.146605	1.51087	0.130821	1
ENSG00000177383	MAGEF1	279.63	0.207343	0.13732	1.50993	0.13106	1
ENSG00000163050	ADCK3	134.621	0.227465	0.150695	1.50944	0.131187	1
ENSG00000172785	CBWD1	50.0276	0.296772	0.196633	1.50927	0.131231	1
ENSG00000110442	COMMD9	88.0067	0.279738	0.185401	1.50883	0.131342	1
ENSG00000139719	VPS33A	172.414	0.234653	0.155538	1.50866	0.131386	1
ENSG00000140961	OSGIN1	200.848	0.220916	0.146432	1.50866	0.131386	1
ENSG00000155366	RHOC	192.068	0.182112	0.12078	1.5078	0.131605	1
ENSG00000092841	MYL6	1279.25	0.148812	0.0986996	1.50772	0.131625	1
ENSG00000230989	HSBP1	645.23	0.141554	0.0939122	1.5073	0.131733	1
ENSG00000146904	EPHA1	54.4186	0.277451	0.184079	1.50724	0.13175	1
ENSG00000099246	RAB18	439.982	0.154279	0.102417	1.50637	0.131971	1
ENSG00000148291	SURF2	55.672	0.325778	0.216326	1.50596	0.132076	1
ENSG00000272931	RP5-943J3.2	18.7611	0.544317	0.361481	1.5058	0.132119	1
ENSG00000142409	ZNF787	192.737	0.233023	0.154793	1.50538	0.132227	1
ENSG00000173692	PSMD1	2966.17	0.128715	0.0855703	1.50421	0.132528	1
ENSG00000253598	SLC10A5	2.77082	1.60889	1.07029	1.50324	0.132778	1
ENSG00000130522	JUND	590.412	0.210806	0.140263	1.50293	0.132857	1
ENSG00000148834	GSTO1	948.364	0.123751	0.0823451	1.50283	0.132883	1
ENSG00000153815	CMIP	859.043	0.143246	0.09533	1.50264	0.132933	1
ENSG00000117262	GPR89A	96.539	0.295364	0.196596	1.50239	0.132997	1
ENSG00000268186	CTC-241F20.4	2.00122	1.78614	1.18934	1.50179	0.133152	1
ENSG00000139725	RHOF	284.676	0.233289	0.155363	1.50157	0.133207	1
ENSG00000100129	EIF3L	1128.44	0.178095	0.118686	1.50056	0.13347	1
ENSG00000110047	EHD1	264.735	0.201092	0.134052	1.5001	0.133588	1
ENSG00000172336	POP7	470.006	0.161232	0.107487	1.50002	0.13361	1
ENSG00000124702	KLHDC3	118.369	0.231638	0.154518	1.4991	0.133848	1
ENSG00000101400	SNTA1	60.7403	0.30015	0.200294	1.49855	0.133991	1
ENSG00000169045	HNRNPH1	3090.25	0.145641	0.0972663	1.49734	0.134305	1
ENSG00000136932	C9orf156	86.5945	0.312077	0.208434	1.49724	0.13433	1
ENSG00000126254	RBM42	244.656	0.212097	0.141736	1.49642	0.134545	1
ENSG00000203797	DDO	10.5024	0.649237	0.43389	1.49632	0.134571	1
ENSG00000175643	RMI2	119.336	0.258761	0.172944	1.49621	0.134599	1
ENSG00000165905	GYLTL1B	201.682	0.233556	0.156104	1.49615	0.134614	1
ENSG00000139726	DENR	561.107	0.134208	0.0897124	1.49598	0.134659	1
ENSG00000124181	PLCG1	164.893	0.230453	0.154062	1.49585	0.134693	1
ENSG00000089486	CDIP1	359.062	0.147632	0.0987136	1.49556	0.134769	1
ENSG00000176222	ZNF404	2.8769	1.6651	1.11351	1.49537	0.134818	1
ENSG00000132361	CLUH	834.868	0.182459	0.122224	1.49283	0.135481	1
ENSG00000129911	KLF16	114.704	0.233168	0.156279	1.492	0.1357	1
ENSG00000179950	PUF60	445.866	0.17524	0.117513	1.49124	0.135899	1
ENSG00000188186	LAMTOR4	127.875	0.225656	0.151367	1.49079	0.136018	1
ENSG00000142002	DPP9	468.031	0.146253	0.0981334	1.49035	0.136133	1
ENSG00000258056	RP11-644F5.11	8.84224	0.82044	0.550509	1.49033	0.136138	1
ENSG00000122971	ACADS	132.102	0.261158	0.175277	1.48997	0.136231	1
ENSG00000131462	TUBG1	1031.73	0.129441	0.0869736	1.48828	0.136677	1
ENSG00000111906	HDDC2	226.258	0.181661	0.122353	1.48474	0.137614	1
ENSG00000108826	MRPL27	526.976	0.162424	0.109409	1.48456	0.137662	1
ENSG00000108039	XPNPEP1	160.921	0.223974	0.150901	1.48425	0.137742	1
ENSG00000150540	HNMT	265.815	0.144963	0.0977067	1.48365	0.137902	1
ENSG00000132963	POMP	1579.55	0.126733	0.0854751	1.48269	0.138156	1
ENSG00000166347	CYB5A	923.375	0.178243	0.120253	1.48223	0.138279	1
ENSG00000171497	PPID	535.472	0.152	0.102548	1.48222	0.138281	1
ENSG00000166831	RBPMS2	135.683	0.23996	0.162073	1.48057	0.138722	1
ENSG00000160710	ADAR	475.68	0.128509	0.0868247	1.48009	0.138848	1
ENSG00000164284	GRPEL2	113.588	0.24515	0.165655	1.47989	0.138904	1
ENSG00000130821	SLC6A8	125.277	0.266409	0.180132	1.47896	0.13915	1
ENSG00000171720	HDAC3	242.648	0.226185	0.152954	1.47878	0.139199	1
ENSG00000089220	PEBP1	9334.71	0.124496	0.084232	1.47801	0.139404	1
ENSG00000196843	ARID5A	106.506	0.224062	0.151605	1.47793	0.139426	1
ENSG00000197622	CDC42SE1	225.299	0.265466	0.179666	1.47755	0.139527	1
ENSG00000150459	SAP18	704.791	0.138383	0.0936633	1.47745	0.139555	1
ENSG00000164054	SHISA5	614.585	0.142575	0.0965381	1.47688	0.139708	1
ENSG00000239697	TNFSF12	9.25644	0.749778	0.507949	1.47609	0.13992	1
ENSG00000063176	SPHK2	72.509	0.258443	0.175229	1.47489	0.140243	1
ENSG00000105447	GRWD1	262.563	0.180729	0.122557	1.47465	0.140307	1
ENSG00000196396	PTPN1	1275.05	0.144077	0.0977076	1.47458	0.140326	1
ENSG00000138867	GUCD1	529.585	0.155792	0.105686	1.4741	0.140454	1
ENSG00000125870	SNRPB2	2676.14	0.115695	0.0784972	1.47387	0.140516	1
ENSG00000141367	CLTC	3493.7	0.121219	0.0822968	1.47295	0.140764	1
ENSG00000111412	C12orf49	132.637	0.257292	0.1748	1.47192	0.141041	1
ENSG00000176076	KCNE1L	6.51615	1.0638	0.722796	1.47179	0.141078	1
ENSG00000133059	DSTYK	121.713	0.26572	0.180581	1.47148	0.141163	1
ENSG00000138286	FAM149B1	34.4482	0.384056	0.261121	1.4708	0.141345	1
ENSG00000167711	SERPINF2	836.803	0.181668	0.12354	1.47052	0.141421	1
ENSG00000196262	PPIA	1073.26	0.136345	0.0927492	1.47004	0.141551	1
ENSG00000111206	FOXM1	280.037	0.1699	0.115667	1.46887	0.141869	1
ENSG00000261221	ZNF865	24.655	0.495781	0.337572	1.46867	0.141923	1
ENSG00000166133	RPUSD2	80.8791	0.272764	0.185875	1.46746	0.142251	1
ENSG00000100241	SBF1	645.404	0.248284	0.16932	1.46636	0.14255	1
ENSG00000122674	CCZ1	76.061	0.266114	0.181515	1.46607	0.142629	1
ENSG00000162078	ZG16B	4.51995	1.20085	0.81943	1.46546	0.142794	1
ENSG00000160218	TRAPPC10	153.247	0.21114	0.144112	1.46511	0.14289	1
ENSG00000170265	ZNF282	302.763	0.229185	0.156533	1.46414	0.143156	1
ENSG00000175324	LSM1	213.686	0.178296	0.121809	1.46374	0.143266	1
ENSG00000116133	DHCR24	2823.81	0.199139	0.136122	1.46294	0.143483	1
ENSG00000167996	FTH1	5241.04	0.122413	0.0837809	1.46111	0.143986	1
ENSG00000260260	RP11-304L19.5	288.835	0.228444	0.156361	1.461	0.144015	1
ENSG00000270170	NCBP2-AS2	186.12	0.261147	0.17876	1.46088	0.144049	1
ENSG00000149257	SERPINH1	405.401	0.275268	0.188447	1.46072	0.144092	1
ENSG00000141002	TCF25	1107.1	0.199019	0.136443	1.45863	0.144667	1
ENSG00000105355	PLIN3	1464.39	0.176827	0.12123	1.45861	0.144671	1
ENSG00000122406	RPL5	6960.13	0.0957645	0.0656994	1.45762	0.144946	1
ENSG00000117543	DPH5	181.79	0.189063	0.129745	1.45719	0.145064	1
ENSG00000116679	IVNS1ABP	190.309	0.192038	0.131893	1.45601	0.145389	1
ENSG00000065665	SEC61A2	53.83	0.359355	0.246823	1.45592	0.145413	1
ENSG00000164062	APEH	225.285	0.193699	0.133049	1.45585	0.145434	1
ENSG00000105372	RPS19	16491.6	0.110056	0.0756232	1.45532	0.145581	1
ENSG00000175334	BANF1	461.952	0.166713	0.114571	1.4551	0.145641	1
ENSG00000141441	GAREM	8.17114	1.48992	1.02639	1.45162	0.146608	1
ENSG00000110906	KCTD10	208.249	0.211655	0.145844	1.45124	0.146714	1
ENSG00000123349	PFDN5	723.638	0.139693	0.0963824	1.44937	0.147236	1
ENSG00000103353	UBFD1	223.815	0.255893	0.17658	1.44916	0.147292	1
ENSG00000112062	MAPK14	184.08	0.206273	0.142339	1.44916	0.147293	1
ENSG00000173894	CBX2	88.9484	0.225986	0.155951	1.44909	0.147314	1
ENSG00000171617	ENC1	151.023	0.219915	0.151785	1.44886	0.147378	1
ENSG00000204435	CSNK2B	424.05	0.171124	0.118121	1.44871	0.147417	1
ENSG00000008988	RPS20	5452.74	0.111715	0.0772587	1.44599	0.148181	1
ENSG00000156510	HKDC1	706.857	0.162971	0.112721	1.44579	0.148237	1
ENSG00000181873	IBA57	55.8276	0.340843	0.235881	1.44498	0.148464	1
ENSG00000251350	RP11-328N19.1	2.00349	2.48034	1.71963	1.44237	0.149199	1
ENSG00000115520	COQ10B	181.149	0.226452	0.157011	1.44227	0.149227	1
ENSG00000095321	CRAT	144.737	0.186142	0.129067	1.44221	0.149244	1
ENSG00000069399	BCL3	152.967	0.222548	0.15433	1.44203	0.149293	1
ENSG00000135636	DYSF	98.138	0.297217	0.206165	1.44165	0.149402	1
ENSG00000185022	MAFF	279.657	0.246496	0.170988	1.4416	0.149416	1
ENSG00000137547	MRPL15	321.955	0.183407	0.127253	1.44128	0.149505	1
ENSG00000212864	RNF208	66.6204	0.251691	0.174686	1.44082	0.149635	1
ENSG00000205250	E2F4	223.722	0.20948	0.145406	1.44066	0.149682	1
ENSG00000174437	ATP2A2	1367.33	0.121713	0.0845162	1.44011	0.149835	1
ENSG00000116176	TPSG1	4.58303	2.07422	1.44077	1.43966	0.149964	1
ENSG00000152518	ZFP36L2	448.708	0.166697	0.115811	1.43938	0.150043	1
ENSG00000163374	YY1AP1	154.812	0.221863	0.154146	1.43931	0.150063	1
ENSG00000136859	ANGPTL2	33.9602	0.384529	0.267373	1.43817	0.150385	1
ENSG00000139998	RAB15	153.769	0.187735	0.130587	1.43762	0.150543	1
ENSG00000176422	SPRYD4	101.508	0.260419	0.181155	1.43755	0.150563	1
ENSG00000158793	NIT1	57.5311	0.340099	0.236692	1.43689	0.15075	1
ENSG00000213928	IRF9	17.3088	0.684797	0.476616	1.43679	0.150778	1
ENSG00000175224	ATG13	437.343	0.176755	0.123088	1.43601	0.151	1
ENSG00000119760	SUPT7L	284.121	0.148173	0.103189	1.43595	0.151017	1
ENSG00000140807	NKD1	719.204	0.120842	0.0842024	1.43514	0.151248	1
ENSG00000167118	URM1	276.562	0.175597	0.122358	1.43511	0.151256	1
ENSG00000196476	C20orf96	120.796	0.247049	0.172159	1.43501	0.151285	1
ENSG00000127080	IPPK	68.6187	0.318392	0.221905	1.43481	0.151341	1
ENSG00000166913	YWHAB	5307.26	0.0990514	0.0690823	1.43382	0.151624	1
ENSG00000237683	AL627309.1	5.16493	1.23941	0.86451	1.43366	0.15167	1
ENSG00000160785	SLC25A44	227.892	0.16821	0.11733	1.43365	0.151673	1
ENSG00000124253	PCK1	9.01801	0.858292	0.598869	1.43319	0.151804	1
ENSG00000117592	PRDX6	970.381	0.100241	0.0699472	1.4331	0.15183	1
ENSG00000090013	BLVRB	241.165	0.205064	0.143253	1.43148	0.152294	1
ENSG00000105321	CCDC9	34.3643	0.460576	0.32176	1.43143	0.152308	1
ENSG00000108292	MLLT6	564.249	0.162486	0.113559	1.43086	0.152471	1
ENSG00000168301	KCTD6	14.7644	0.551805	0.385833	1.43016	0.15267	1
ENSG00000143761	ARF1	1630.01	0.100685	0.0704089	1.43	0.152718	1
ENSG00000011198	ABHD5	63.6077	0.321176	0.224941	1.42782	0.153344	1
ENSG00000163319	MRPS18C	470.641	0.135283	0.094789	1.42721	0.15352	1
ENSG00000165795	NDRG2	90.7694	0.267627	0.187586	1.42669	0.15367	1
ENSG00000015475	BID	273.502	0.159668	0.11198	1.42586	0.153908	1
ENSG00000197536	C5orf56	9.56614	0.660192	0.463354	1.42481	0.154212	1
ENSG00000161835	GRASP	21.5038	0.502895	0.353039	1.42448	0.154309	1
ENSG00000068323	TFE3	170.459	0.260325	0.182759	1.42442	0.154325	1
ENSG00000168610	STAT3	544.039	0.19046	0.133766	1.42383	0.154496	1
ENSG00000214160	ALG3	711.273	0.163002	0.114509	1.42348	0.154596	1
ENSG00000171224	C10orf35	51.9181	0.509178	0.357755	1.42326	0.154661	1
ENSG00000157379	DHRS1	194.62	0.254023	0.178543	1.42276	0.154807	1
ENSG00000160208	RRP1B	467.257	0.121496	0.085438	1.42204	0.155015	1
ENSG00000048162	NOP16	350.239	0.128103	0.0901502	1.421	0.155318	1
ENSG00000182541	LIMK2	117.639	0.222674	0.156793	1.42018	0.155556	1
ENSG00000065882	TBC1D1	123.343	0.240678	0.16959	1.41918	0.155848	1
ENSG00000100908	EMC9	142.609	0.185557	0.130776	1.41889	0.155932	1
ENSG00000228109	MFI2-AS1	8.61971	1.00147	0.705956	1.4186	0.156016	1
ENSG00000269893	SNHG8	926.97	0.150747	0.106373	1.41716	0.156436	1
ENSG00000151694	ADAM17	963.616	0.115846	0.0817983	1.41624	0.156704	1
ENSG00000167468	GPX4	665.416	0.122898	0.0868548	1.41499	0.157072	1
ENSG00000108528	SLC25A11	187.301	0.194222	0.137291	1.41467	0.157166	1
ENSG00000005194	CIAPIN1	200.667	0.202046	0.142904	1.41386	0.157402	1
ENSG00000088832	FKBP1A	2076.55	0.146623	0.103708	1.41381	0.157419	1
ENSG00000100320	RBFOX2	250.03	0.168943	0.119516	1.41356	0.157492	1
ENSG00000112855	HARS2	76.6497	0.255685	0.180921	1.41325	0.157583	1
ENSG00000172115	CYCS	1012.5	0.100714	0.0713189	1.41217	0.157899	1
ENSG00000161647	MPP3	20.5317	0.666634	0.47245	1.41102	0.15824	1
ENSG00000126945	HNRNPH2	243.972	0.173223	0.122769	1.41097	0.158254	1
ENSG00000136305	CIDEB	386.308	0.194712	0.138001	1.41095	0.15826	1
ENSG00000272593	RP11-339B21.11	6.44171	0.970823	0.688265	1.41054	0.158381	1
ENSG00000108671	PSMD11	2978.79	0.203934	0.144587	1.41046	0.158404	1
ENSG00000008517	IL32	1202.47	0.192537	0.136552	1.40999	0.158544	1
ENSG00000140319	SRP14	2762.83	0.144826	0.102717	1.40995	0.158554	1
ENSG00000079739	PGM1	190.009	0.178774	0.126795	1.40994	0.158556	1
ENSG00000130684	ZNF337	165.013	0.244475	0.173398	1.4099	0.158568	1
ENSG00000006534	ALDH3B1	27.1456	0.364925	0.258957	1.40921	0.158773	1
ENSG00000172602	RND1	51.0455	0.413068	0.293263	1.40852	0.158976	1
ENSG00000139428	MMAB	110.474	0.210327	0.149355	1.40823	0.159062	1
ENSG00000158669	AGPAT6	474.403	0.166641	0.118337	1.40819	0.159074	1
ENSG00000089063	TMEM230	384.476	0.178505	0.126796	1.40781	0.159187	1
ENSG00000148572	NRBF2	154.534	0.263911	0.188056	1.40337	0.160507	1
ENSG00000137504	CREBZF	355.597	0.187948	0.13393	1.40333	0.160518	1
ENSG00000159210	SNF8	585.467	0.109319	0.0780499	1.40063	0.161326	1
ENSG00000265242	RP11-649A18.7	9.65053	0.704132	0.50372	1.39786	0.162154	1
ENSG00000144580	RQCD1	444.594	0.157775	0.112892	1.39757	0.162241	1
ENSG00000132463	GRSF1	620.924	0.123013	0.0880422	1.39721	0.16235	1
ENSG00000169446	MMGT1	317.453	0.187682	0.134396	1.39648	0.16257	1
ENSG00000103275	UBE2I	890.615	0.122453	0.0876912	1.39641	0.162592	1
ENSG00000137825	ITPKA	244.913	0.155035	0.111038	1.39624	0.162644	1
ENSG00000269293	ZSCAN16-AS1	68.6216	0.222361	0.159258	1.39623	0.162645	1
ENSG00000147224	PRPS1	186.393	0.198197	0.142053	1.39523	0.162945	1
ENSG00000118418	HMGN3	178.082	0.190143	0.136284	1.39519	0.162957	1
ENSG00000146425	DYNLT1	349.838	0.175113	0.125531	1.39498	0.163023	1
ENSG00000170892	TSEN34	333.814	0.185052	0.132672	1.39481	0.163073	1
ENSG00000182473	EXOC7	631.853	0.172117	0.123436	1.39438	0.163203	1
ENSG00000150764	DIXDC1	88.3398	0.234285	0.16807	1.39397	0.163326	1
ENSG00000175606	TMEM70	152.258	0.228819	0.164167	1.39382	0.163371	1
ENSG00000126467	TSKS	2.57008	1.45165	1.04159	1.39369	0.163411	1
ENSG00000185044	RP11-435B5.4	2.02258	1.97175	1.41483	1.39363	0.163428	1
ENSG00000136933	RABEPK	293.873	0.156402	0.112286	1.39289	0.163654	1
ENSG00000136942	RPL35	3490.13	0.148725	0.10686	1.39177	0.163993	1
ENSG00000143543	JTB	551.181	0.134064	0.0963354	1.39163	0.164033	1
ENSG00000123989	CHPF	427.085	0.176625	0.126954	1.39126	0.164148	1
ENSG00000197894	ADH5	594.822	0.180326	0.129666	1.3907	0.164317	1
ENSG00000121274	PAPD5	718.449	0.174683	0.125651	1.39023	0.16446	1
ENSG00000124541	RRP36	241.159	0.164773	0.118562	1.38976	0.164601	1
ENSG00000135002	RFK	365.388	0.138789	0.0999507	1.38858	0.164961	1
ENSG00000187997	C17orf99	13.4281	0.53709	0.386822	1.38847	0.164995	1
ENSG00000184009	ACTG1	5543.55	0.13041	0.0939286	1.3884	0.165016	1
ENSG00000129472	RAB2B	141.441	0.233371	0.168108	1.38822	0.16507	1
ENSG00000248550	OTX2-AS1	3.14032	1.44361	1.04037	1.38759	0.16526	1
ENSG00000136238	RAC1	2062.32	0.11695	0.0843497	1.3865	0.165596	1
ENSG00000168924	LETM1	361.154	0.150271	0.108409	1.38616	0.165699	1
ENSG00000106028	SSBP1	855.593	0.100737	0.0727113	1.38544	0.165919	1
ENSG00000141480	ARRB2	927.473	0.166994	0.120611	1.38457	0.166185	1
ENSG00000125779	PANK2	431.712	0.136314	0.0984545	1.38454	0.166193	1
ENSG00000143373	ZNF687	66.5226	0.348449	0.251675	1.38452	0.166199	1
ENSG00000166747	AP1G1	323.027	0.177606	0.128361	1.38364	0.166468	1
ENSG00000087152	ATXN7L3	285.778	0.135185	0.0977526	1.38293	0.166686	1
ENSG00000117151	CTBS	36.8452	0.325641	0.23548	1.38288	0.166701	1
ENSG00000215717	TMEM167B	108.676	0.270371	0.195637	1.38201	0.16697	1
ENSG00000211445	GPX3	310.968	0.148304	0.107334	1.38171	0.167062	1
ENSG00000141971	MVB12A	78.7043	0.232834	0.168588	1.38108	0.167255	1
ENSG00000107021	TBC1D13	133.338	0.215986	0.15639	1.38107	0.167256	1
ENSG00000167861	HID1	92.5325	0.339608	0.246003	1.38051	0.167431	1
ENSG00000169217	CD2BP2	263.067	0.182742	0.132431	1.37991	0.167615	1
ENSG00000105197	TIMM50	390.077	0.123816	0.0897423	1.37969	0.167683	1
ENSG00000116353	MECR	75.9752	0.286683	0.207803	1.37959	0.167713	1
ENSG00000156858	PRR14	55.525	0.249628	0.180945	1.37958	0.167715	1
ENSG00000177169	ULK1	407.821	0.230646	0.167234	1.37918	0.167839	1
ENSG00000269386	RAB11B-AS1	29.4495	0.513067	0.37216	1.37862	0.168012	1
ENSG00000180884	ZNF792	14.1505	0.541546	0.392826	1.37859	0.168021	1
ENSG00000168522	FNTA	297.142	0.177424	0.128733	1.37824	0.16813	1
ENSG00000188488	SERPINA5	2215.32	0.145051	0.105271	1.37788	0.168241	1
ENSG00000132768	DPH2	195.26	0.171689	0.124779	1.37594	0.168839	1
ENSG00000132661	NXT1	172.162	0.202262	0.147017	1.37577	0.168891	1
ENSG00000120738	EGR1	31.2394	0.32991	0.239922	1.37507	0.169109	1
ENSG00000108515	ENO3	79.1174	0.285336	0.207672	1.37398	0.169449	1
ENSG00000205476	CCDC85C	161.204	0.154968	0.112795	1.37389	0.169477	1
ENSG00000167815	PRDX2	260.255	0.173697	0.126434	1.37382	0.169498	1
ENSG00000113575	PPP2CA	665.682	0.144866	0.105471	1.37351	0.169592	1
ENSG00000154518	ATP5G3	3148.81	0.117396	0.0854758	1.37344	0.169617	1
ENSG00000099814	CEP170B	500.185	0.19214	0.139901	1.3734	0.169627	1
ENSG00000147872	PLIN2	2638.96	0.153445	0.111819	1.37226	0.169984	1
ENSG00000119723	COQ6	132.63	0.180967	0.131911	1.37188	0.1701	1
ENSG00000014138	POLA2	41.576	0.366056	0.266871	1.37166	0.170169	1
ENSG00000153310	FAM49B	327.747	0.152016	0.110833	1.37157	0.170197	1
ENSG00000123612	ACVR1C	2.00913	1.35858	0.991354	1.37043	0.170553	1
ENSG00000170619	COMMD5	152.026	0.18863	0.137665	1.37021	0.170622	1
ENSG00000041988	THAP3	98.8198	0.276942	0.202139	1.37006	0.170668	1
ENSG00000119917	IFIT3	17.7898	0.538909	0.393415	1.36982	0.170743	1
ENSG00000169020	ATP5I	1137.71	0.1767	0.129049	1.36925	0.170921	1
ENSG00000244405	ETV5	274.359	0.216129	0.157892	1.36884	0.171048	1
ENSG00000137207	YIPF3	265.16	0.206235	0.150683	1.36867	0.171102	1
ENSG00000179010	MRFAP1	1981.53	0.107106	0.0782563	1.36865	0.171107	1
ENSG00000013275	PSMC4	3597.63	0.122015	0.089195	1.36796	0.171326	1
ENSG00000198642	KLHL9	130.251	0.226144	0.165382	1.36741	0.171497	1
ENSG00000166851	PLK1	646.544	0.187147	0.13691	1.36694	0.171645	1
ENSG00000125107	CNOT1	749.594	0.150445	0.110098	1.36647	0.171792	1
ENSG00000110801	PSMD9	26.0149	0.379787	0.277955	1.36636	0.171825	1
ENSG00000102547	CAB39L	16.6803	0.596464	0.436571	1.36625	0.171861	1
ENSG00000162062	C16orf59	46.843	0.340627	0.249341	1.36611	0.171905	1
ENSG00000028839	TBPL1	83.2758	0.28372	0.207733	1.36579	0.172005	1
ENSG00000105258	POLR2I	309.512	0.164737	0.120618	1.36577	0.17201	1
ENSG00000182628	SKA2	598.791	0.138176	0.101172	1.36575	0.172017	1
ENSG00000100324	TAB1	71.0708	0.242731	0.177808	1.36514	0.17221	1
ENSG00000017373	SRCIN1	8.69133	0.785694	0.576001	1.36405	0.172552	1
ENSG00000244038	DDOST	265.018	0.204483	0.149923	1.36392	0.172594	1
ENSG00000170275	CRTAP	271.972	0.258048	0.189219	1.36375	0.172646	1
ENSG00000249471	ZNF324B	7.16661	0.807522	0.592255	1.36347	0.172735	1
ENSG00000166135	HIF1AN	228.802	0.192344	0.141221	1.362	0.173197	1
ENSG00000053371	AKR7A2	257.138	0.202667	0.148974	1.36042	0.173697	1
ENSG00000117133	RPF1	315.562	0.177892	0.130839	1.35962	0.173949	1
ENSG00000107341	UBE2R2	1139.19	0.100057	0.0736323	1.35887	0.174189	1
ENSG00000050820	BCAR1	303.125	0.14708	0.108256	1.35863	0.174263	1
ENSG00000188566	NDOR1	12.2092	0.56147	0.413419	1.35812	0.174427	1
ENSG00000213988	ZNF90	30.2465	0.396626	0.292068	1.35799	0.174466	1
ENSG00000131236	CAP1	1092.96	0.102529	0.0755104	1.35781	0.174522	1
ENSG00000106263	EIF3B	1262.78	0.125575	0.0925482	1.35686	0.174825	1
ENSG00000171124	FUT3	2.83244	1.89407	1.39692	1.3559	0.175132	1
ENSG00000177352	CCDC71	42.7597	0.357663	0.263959	1.355	0.175418	1
ENSG00000135924	DNAJB2	142.9	0.230377	0.170052	1.35474	0.175499	1
ENSG00000179292	TMEM151A	1.93299	2.08289	1.53757	1.35466	0.175526	1
ENSG00000103043	VAC14	24.1052	0.368524	0.272051	1.35461	0.175541	1
ENSG00000262585	RP11-353N14.5	11.7979	0.548201	0.404802	1.35425	0.175658	1
ENSG00000067221	STOML1	16.3267	0.481984	0.356062	1.35365	0.175847	1
ENSG00000176485	PLA2G16	556.823	0.178739	0.132088	1.35318	0.175997	1
ENSG00000116670	MAD2L2	160.278	0.209756	0.155022	1.35307	0.176033	1
ENSG00000172922	RNASEH2C	166.678	0.233371	0.172531	1.35264	0.176172	1
ENSG00000273391	RP11-634H22.1	5.45408	0.849541	0.628499	1.3517	0.176472	1
ENSG00000160783	PMF1	153.549	0.217393	0.160848	1.35154	0.176522	1
ENSG00000134333	LDHA	1990.56	0.123617	0.0914859	1.35121	0.176629	1
ENSG00000132507	EIF5A	670.615	0.191626	0.141841	1.35099	0.176699	1
ENSG00000168439	STIP1	896.607	0.164077	0.121492	1.35052	0.176849	1
ENSG00000184207	PGP	249.68	0.149517	0.110762	1.34989	0.17705	1
ENSG00000185340	GAS2L1	84.0842	0.242708	0.179847	1.34953	0.177168	1
ENSG00000171914	TLN2	141.335	0.184677	0.137044	1.34757	0.177798	1
ENSG00000173436	MINOS1	172.528	0.209987	0.155832	1.34752	0.177813	1
ENSG00000116120	FARSB	347.092	0.16037	0.119083	1.3467	0.178076	1
ENSG00000104856	RELB	92.8972	0.333304	0.247514	1.34661	0.178106	1
ENSG00000141385	AFG3L2	444.397	0.136863	0.10164	1.34654	0.178129	1
ENSG00000198911	SREBF2	256.196	0.193406	0.143642	1.34644	0.178159	1
ENSG00000179958	DCTPP1	211.61	0.173445	0.12883	1.34631	0.178204	1
ENSG00000221953	C1orf229	1.66273	1.33792	0.9939	1.34613	0.178259	1
ENSG00000236104	ZBTB22	13.4467	0.497107	0.369523	1.34527	0.178539	1
ENSG00000157954	WIPI2	586.559	0.118966	0.088445	1.34509	0.178597	1
ENSG00000176533	GNG7	53.2486	0.295744	0.219886	1.34499	0.17863	1
ENSG00000102317	RBM3	465.457	0.19358	0.143971	1.34458	0.178761	1
ENSG00000149547	EI24	941.351	0.160386	0.119336	1.34399	0.178953	1
ENSG00000142507	PSMB6	1104.59	0.147339	0.109669	1.34349	0.179113	1
ENSG00000100031	GGT1	49.1636	0.346565	0.258037	1.34309	0.179244	1
ENSG00000230487	PSMG3-AS1	11.0483	0.673012	0.501207	1.34278	0.179343	1
ENSG00000149476	DAK	529.755	0.115527	0.0860449	1.34263	0.179391	1
ENSG00000132612	VPS4A	123.08	0.197642	0.147213	1.34256	0.179415	1
ENSG00000111057	KRT18	2950.82	0.14502	0.108042	1.34226	0.179513	1
ENSG00000169100	SLC25A6	2620.73	0.133451	0.0994491	1.3419	0.179628	1
ENSG00000105137	SYDE1	27.4738	0.442409	0.329739	1.34169	0.179696	1
ENSG00000251022	THAP9-AS1	58.9633	0.326841	0.24366	1.34138	0.179796	1
ENSG00000234127	TRIM26	160.406	0.220138	0.164129	1.34125	0.17984	1
ENSG00000131944	C19orf40	60.2553	0.244706	0.182569	1.34035	0.180133	1
ENSG00000069696	DRD4	3.13167	1.10749	0.826865	1.33938	0.180447	1
ENSG00000163814	CDCP1	130.514	0.210212	0.157113	1.33797	0.180906	1
[truncated: 11,763 more rows]

## Sheet: Nelf+Btz_vs_Btz
geneID	geneName	baseMean	log2FoldChange	lfcSE	stat	pvalue	padj
[truncated: 12,901 more rows]

[truncated: 1 more sheets: ISRIB+Btz_vs_Btz]
