# Supplementary material for: Pharmacological or TRIB3-Mediated Suppression of ATF4 Transcriptional Activity Promotes Hepatoma Cell Resistance to Proteasome Inhibitor Bortezomib
Source: Cancers (Basel). 2021 May 12;13(10):2341. doi: 10.3390/cancers13102341 (PMC8150958; doi:10.3390/cancers13102341)
Supplement: Supplementary file 1 [file cancers-13-02341-s001.zip › Supplementary Table S2.xlsx]

## Sheet: (A) ChIP-Seq merged peaks
PeakID	Chr	Start	End	TRIB3_peak_Ctrl	TRIB3_peak_Btz	ATF4_peak_Btz	Annotation	Detailed.Annotation	Distance.to.TSS	Nearest.PromoterID	Entrez.ID	Nearest.Unigene	Nearest.Refseq	Nearest.Ensembl	Gene.Name	Gene.Alias	Gene.Description	Gene.Type	avg_signal_depthnormalized.TRIB3.Ctrl	avg_signal_depthnormalized.TRIB3.Btz	avg_signal_depthnormalized.ATF4.Btz	avg_signal_depthnormalized.INPUT.Btz	avg_signal_depthnormalized.INPUT.Ctrl	avg_signal_depthnormalized.FlagBackground.Btz
Merged-chr1-715144-5	chr1	714953	715346	FALSE	TRUE	TRUE	Intergenic	AluSx|SINE|Alu	-1081	NR_033908	100288069	Hs.527521	NR_033908		LOC100288069	-	uncharacterized LOC100288069	ncRNA	3.55	15.8667	9.655	1.64	3.685	3.51
Merged-chr1-999675-4	chr1	999450	999895	FALSE	FALSE	TRUE	intron (NR_148960, intron 3 of 3)	intron (NR_148960, intron 3 of 3)	4558	NR_148960	100288175	Hs.713286	NR_148960	ENSG00000217801	LOC100288175	-	uncharacterized LOC100288175	ncRNA	3.955	36.3333	18.11	6.01333	2.91	4.51
Merged-chr1-1173571-3	chr1	1173382	1173772	FALSE	TRUE	FALSE	Intergenic	Intergenic	5948	NM_080605	126792	Hs.284284	NM_080605	ENSG00000176022	B3GALT6	EDSP2|EDSSPD2|SEMDJL1|beta3GalT6	beta-1,3-galactosyltransferase 6	protein-coding	4.39	20.7533	7.48	4.11333	2.52	2.51
Merged-chr1-1617860-4	chr1	1617695	1618075	FALSE	TRUE	FALSE	intron (NM_001110781, intron 1 of 8)	L1MC4|LINE|L1	6358	NM_001290264	728661	Hs.655255	NM_001110781	ENSG00000189339	SLC35E2B	SLC35E2	solute carrier family 35 member E2B	protein-coding	3.445	30.0933	17.405	5.08333	2.91	3.51
Merged-chr1-1838788-4	chr1	1838591	1838965	FALSE	TRUE	FALSE	Intergenic	Intergenic	-7488	NM_138705	163688	Hs.85902	NM_138705	ENSG00000169885	CALML6	CAGLP	calmodulin like 6	protein-coding	1.575	13.5167	8.275	1.52	1.94	0
Merged-chr1-2166216-5	chr1	2165981	2166473	FALSE	TRUE	TRUE	intron (NM_003036, intron 1 of 6)	intron (NM_003036, intron 1 of 6)	6093	NM_003036	6497	Hs.656507	NM_003036	ENSG00000157933	SKI	SGS|SKV	SKI proto-oncogene	protein-coding	8.75	61.52	15.525	4.12667	5.04	5.51
Merged-chr1-3238983-5	chr1	3238710	3239244	FALSE	TRUE	TRUE	intron (NM_022114, intron 3 of 16)	intron (NM_022114, intron 3 of 16)	-132170	NM_014448	27237	Hs.87435	NM_014448	ENSG00000130762	ARHGEF16	GEF16|NBR	Rho guanine nucleotide exchange factor 16	protein-coding	3.345	24.6033	17.405	3.56	2.52	3.51
Merged-chr1-3521232-3	chr1	3521086	3521384	FALSE	TRUE	FALSE	intron (NM_001409, intron 1 of 36)	intron (NM_001409, intron 1 of 36)	6824	NM_001409	1953	Hs.593645	NM_001409	ENSG00000162591	MEGF6	EGFL3	multiple EGF like domains 6	protein-coding	1.615	10.88	4.08	1.37667	1.165	1
Merged-chr1-4052314-3	chr1	4051944	4052711	FALSE	TRUE	FALSE	Intergenic	(ATGTG)n|Simple_repeat|Simple_repeat	-43287	NR_147024	105376672	Hs.435087	NR_147024	ENSG00000226374	LINC01345	-	long intergenic non-protein coding RNA 1345	ncRNA	1.835	25	7.365	3.16667	2.135	1
Merged-chr1-6231088-4	chr1	6230910	6231221	FALSE	FALSE	TRUE	intron (NM_015557, intron 1 of 41)	intron (NM_015557, intron 1 of 41)	9129	NM_015557	26038	Hs.522898	NM_015557	ENSG00000116254	CHD5	CHD-5	chromodomain helicase DNA binding protein 5	protein-coding	1.28	7.02667	8.315	0.676667	0.97	1
Merged-chr1-6470593-5	chr1	6470284	6470926	FALSE	TRUE	TRUE	Intergenic	L1MA4|LINE|L1	9374	NM_019089	54626	Hs.118727	NM_019089	ENSG00000069812	HES2	bHLHb40	hes family bHLH transcription factor 2	protein-coding	5.72	30.3967	24.07	5.31667	2.715	4.51
Merged-chr1-7018651-3	chr1	7018402	7018822	FALSE	TRUE	FALSE	intron (NM_001349608, intron 2 of 21)	intron (NM_001349608, intron 2 of 21)	173228	NR_146202	23261	Hs.397705	NM_015215	ENSG00000171735	CAMTA1	CANPMR	calmodulin binding transcription activator 1	protein-coding	2.275	11.6967	6.21	1.52333	1.555	0.5
Merged-chr1-8000159-5	chr1	7999934	8000428	FALSE	TRUE	TRUE	intron (NM_001561, intron 2 of 8)	intron (NM_001561, intron 2 of 8)	3044	NM_001561	3604	Hs.86447	NM_001561	ENSG00000049249	TNFRSF9	4-1BB|CD137|CDw137|ILA	TNF receptor superfamily member 9	protein-coding	2.64	15.98	13.735	1.91333	2.52	3.01
Merged-chr1-8027925-5	chr1	8027761	8028128	FALSE	TRUE	TRUE	intron (NM_007262, intron 3 of 6)	AluJo|SINE|Alu	6230	NM_001123377	11315	Hs.419640	NM_007262	ENSG00000116288	PARK7	DJ-1|DJ1|GATD2|HEL-S-67p	Parkinsonism associated deglycase	protein-coding	2.79	12.7833	10.88	2.47	2.71	2
Merged-chr1-8087623-5	chr1	8087433	8087842	FALSE	TRUE	TRUE	Intergenic	Intergenic	-1244	NM_018948	54206	Hs.605445	NM_018948	ENSG00000116285	ERRFI1	GENE-33|MIG-6|MIG6|RALT	ERBB receptor feedback inhibitor 1	protein-coding	4.945	26.9833	18.36	4.95	4.655	2.51
Merged-chr1-8202014-3	chr1	8201726	8202299	FALSE	TRUE	FALSE	Intergenic	Intergenic	-66720	NR_125998	102724539	Hs.516816	NR_125998	ENSG00000227634	LINC01714	-	long intergenic non-protein coding RNA 1714	ncRNA	4.17	19.97	8.23	4.11	2.135	6.01
Merged-chr1-8242473-5	chr1	8242096	8242668	FALSE	TRUE	TRUE	Intergenic	Intergenic	-26350	NR_125998	102724539	Hs.516816	NR_125998	ENSG00000227634	LINC01714	-	long intergenic non-protein coding RNA 1714	ncRNA	6.915	39.13	19.31	7.28	5.82	3.01
Merged-chr1-8254633-4	chr1	8254386	8254892	FALSE	FALSE	TRUE	Intergenic	Intergenic	-14093	NR_125998	102724539	Hs.516816	NR_125998	ENSG00000227634	LINC01714	-	long intergenic non-protein coding RNA 1714	ncRNA	1.21	24.1367	16.95	2.74333	1.745	2
Merged-chr1-8257824-5	chr1	8257515	8258140	FALSE	TRUE	TRUE	Intergenic	L1MC4|LINE|L1	-10905	NR_125998	102724539	Hs.516816	NR_125998	ENSG00000227634	LINC01714	-	long intergenic non-protein coding RNA 1714	ncRNA	8.53	37.2267	25.43	3.54667	6.98	8.02
Merged-chr1-8272198-6	chr1	8271694	8272733	TRUE	TRUE	TRUE	intron (NR_125998, intron 2 of 3)	intron (NR_125998, intron 2 of 3)	3481	NR_125998	102724539	Hs.516816	NR_125998	ENSG00000227634	LINC01714	-	long intergenic non-protein coding RNA 1714	ncRNA	25.835	112.48	76.905	10.38	10.08	15.04
Merged-chr1-8319131-5	chr1	8318869	8319505	FALSE	TRUE	TRUE	Intergenic	Intergenic	50455	NR_125998	102724539	Hs.516816	NR_125998	ENSG00000227634	LINC01714	-	long intergenic non-protein coding RNA 1714	ncRNA	7.515	42.5467	16.84	9.88	7.95	3.01
Merged-chr1-8319929-3	chr1	8319581	8320143	FALSE	TRUE	FALSE	Intergenic	Intergenic	51130	NR_125998	102724539	Hs.516816	NR_125998	ENSG00000227634	LINC01714	-	long intergenic non-protein coding RNA 1714	ncRNA	4.795	23.2867	7.55	4.36667	7.17	9.02
Merged-chr1-8323454-3	chr1	8323325	8323576	FALSE	TRUE	FALSE	Intergenic	Intergenic	-54695	NM_001080397	50651	Hs.463036	NM_001080397	ENSG00000162426	SLC45A1	DNB5|IDDNPF	solute carrier family 45 member 1	protein-coding	0.185	10.32	4.535	1.22333	1.165	2
Merged-chr1-8704095-5	chr1	8703722	8704385	FALSE	TRUE	TRUE	intron (NM_001042681, intron 2 of 22)	intron (NM_001042681, intron 2 of 22)	-149080	NR_132752	106632271		NR_132752		SNORD128	ZL43	small nucleolar RNA, C/D box 128	snoRNA	4.105	39.96	25.705	7.43333	4.65	6.52
Merged-chr1-8761658-4	chr1	8761471	8761933	FALSE	FALSE	TRUE	intron (NM_001042681, intron 1 of 22)	intron (NM_001042681, intron 1 of 22)	115997	NM_012102	473	Hs.463041	NM_012102	ENSG00000142599	RERE	ARG|ARP|ATN1L|DNB1|NEDBEH	arginine-glutamic acid dipeptide repeats	protein-coding	5.89	15.9233	14.71	3.85	4.455	4.51
Merged-chr1-8800306-3	chr1	8800089	8800494	FALSE	TRUE	FALSE	intron (NM_001042681, intron 1 of 22)	Tigger3b|DNA|TcMar-Tigger	77408	NM_012102	473	Hs.463041	NM_012102	ENSG00000142599	RERE	ARG|ARP|ATN1L|DNB1|NEDBEH	arginine-glutamic acid dipeptide repeats	protein-coding	3.885	24.0367	5.35	4.08333	5.815	4.51
Merged-chr1-8842268-5	chr1	8841877	8842740	FALSE	TRUE	TRUE	intron (NM_001042681, intron 1 of 22)	L2a|LINE|L2	35391	NM_012102	473	Hs.463041	NM_012102	ENSG00000142599	RERE	ARG|ARP|ATN1L|DNB1|NEDBEH	arginine-glutamic acid dipeptide repeats	protein-coding	6.775	35.06	20.515	6.99	5.815	5.01
Merged-chr1-8885163-3	chr1	8884935	8885369	FALSE	TRUE	FALSE	Intergenic	AluSg7|SINE|Alu	-7453	NM_001042681	473	Hs.463041	NM_012102	ENSG00000142599	RERE	ARG|ARP|ATN1L|DNB1|NEDBEH	arginine-glutamic acid dipeptide repeats	protein-coding	1.465	11.1867	6.46	1.78	2.13	2
Merged-chr1-8917518-5	chr1	8917245	8917874	FALSE	TRUE	TRUE	Intergenic	MER5B|DNA|hAT-Charlie	9090	NR_106786	102465436		NR_106786	ENSG00000274258	MIR6728	hsa-mir-6728	microRNA 6728	ncRNA	8.585	46.5867	28.265	7.13333	6.205	6.52
Merged-chr1-8940205-5	chr1	8939997	8940510	FALSE	TRUE	TRUE	TTS (NR_038351)	TTS (NR_038351)	1359	NR_038351	100505975	Hs.429843	NR_038351	ENSG00000230679	ENO1-AS1	-	ENO1 antisense RNA 1	ncRNA	6.665	45.2867	19.085	4.68667	5.62	2.51
Merged-chr1-9160944-5	chr1	9160654	9161177	FALSE	TRUE	TRUE	Intergenic	AluJb|SINE|Alu	28314	NM_024980	80045	Hs.632367	NM_024980	ENSG00000180758	GPR157	-	G protein-coupled receptor 157	protein-coding	4.205	27.7633	19.175	4.81333	5.235	4.51
Merged-chr1-9350193-5	chr1	9349651	9350544	FALSE	TRUE	TRUE	Intergenic	Intergenic	-2844	NM_025106	80176	Hs.8261	NM_025106	ENSG00000171621	SPSB1	SSB-1|SSB1	splA/ryanodine receptor domain and SOCS box containing 1	protein-coding	7.77	80.5667	38.465	9.68333	5.235	9.02
Merged-chr1-9360253-5	chr1	9359937	9360526	FALSE	TRUE	FALSE	intron (NM_025106, intron 1 of 2)	ERVL-B4-int|LTR|ERVL	7290	NM_025106	80176	Hs.8261	NM_025106	ENSG00000171621	SPSB1	SSB-1|SSB1	splA/ryanodine receptor domain and SOCS box containing 1	protein-coding	2.975	22.7333	12.535	4.25	3.49	5.01
Merged-chr1-9504510-5	chr1	9504178	9504874	FALSE	TRUE	TRUE	Intergenic	Intergenic	-15471	NR_104622	100506022	Hs.131775	NR_104622	ENSG00000284693	LOC100506022	-	uncharacterized LOC100506022	ncRNA	8.055	34.62	27.15	7.13333	5.62	3.51
Merged-chr1-9563521-5	chr1	9563283	9563722	FALSE	TRUE	TRUE	Intergenic	Intergenic	-36026	NM_032315	84275	Hs.568613	NM_032315	ENSG00000171612	SLC25A33	BMSC-MCP|PNC1	solute carrier family 25 member 33	protein-coding	3.805	37.8133	20.15	5.32333	3.875	3.01
Merged-chr1-9610486-4	chr1	9610282	9610673	FALSE	TRUE	FALSE	intron (NM_032315, intron 1 of 6)	intron (NM_032315, intron 1 of 6)	10949	NM_032315	84275	Hs.568613	NM_032315	ENSG00000171612	SLC25A33	BMSC-MCP|PNC1	solute carrier family 25 member 33	protein-coding	3.875	26.37	13.735	4.37	4.075	3.01
Merged-chr1-9614148-5	chr1	9613715	9614619	FALSE	TRUE	TRUE	intron (NM_032315, intron 2 of 6)	intron (NM_032315, intron 2 of 6)	14639	NM_032315	84275	Hs.568613	NM_032315	ENSG00000171612	SLC25A33	BMSC-MCP|PNC1	solute carrier family 25 member 33	protein-coding	11.48	54.4167	25.955	6.79667	9.5	5.51
Merged-chr1-9876475-4	chr1	9876327	9876633	FALSE	TRUE	FALSE	intron (NM_001009566, intron 1 of 18)	L1MB7|LINE|L1	8104	NM_001009566	22883	Hs.29665	NM_014944	ENSG00000171603	CLSTN1	ALC-ALPHA|CDHR12|CST-1|CSTN1|PIK3CD|XB31alpha|alcalpha1|alcalpha2	calsyntenin 1	protein-coding	2.275	15.0033	7.23	1.92	0.97	1.5
Merged-chr1-10115930-5	chr1	10115608	10116153	FALSE	TRUE	TRUE	intron (NM_001105562, intron 1 of 27)	AluSz|SINE|Alu	22839	NM_006048	10277	Hs.593974	NM_006048	ENSG00000130939	UBE4B	E4|HDNB1|UBOX3|UFD2|UFD2A	ubiquitination factor E4B	protein-coding	1.36	26.4767	21.465	5.57333	2.325	4.01
Merged-chr1-10382916-4	chr1	10382747	10383096	FALSE	FALSE	TRUE	intron (NM_015074, intron 22 of 46)	intron (NM_015074, intron 22 of 46)	23897	NR_125730	103625684		NR_125730	ENSG00000207357	RNU6-2	U6-2	RNA, U6 small nuclear 2	snRNA	1.65	10.25	12.375	1.79	3.1	0.5
Merged-chr1-10434633-5	chr1	10434399	10434955	FALSE	TRUE	TRUE	intron (NM_015074, intron 44 of 46)	intron (NM_015074, intron 44 of 46)	-24372	NM_002631	5226	Hs.464071	NM_002631	ENSG00000142657	PGD	6PGD	phosphogluconate dehydrogenase	protein-coding	2.12	23.1433	15.66	2.18	4.07	4.01
Merged-chr1-10615934-5	chr1	10615709	10616304	FALSE	TRUE	TRUE	intron (NM_004565, intron 3 of 8)	intron (NM_004565, intron 3 of 8)	81003	NM_004565	5195	Hs.149983	NM_004565	ENSG00000142655	PEX14	NAPP2|PBD13A|Pex14p|dJ734G22.2	peroxisomal biogenesis factor 14	protein-coding	3.515	22.19	13.075	2.05333	2.33	3.01
Merged-chr1-10616685-5	chr1	10616470	10617000	FALSE	TRUE	TRUE	intron (NM_004565, intron 3 of 8)	intron (NM_004565, intron 3 of 8)	81732	NM_004565	5195	Hs.149983	NM_004565	ENSG00000142655	PEX14	NAPP2|PBD13A|Pex14p|dJ734G22.2	peroxisomal biogenesis factor 14	protein-coding	1.575	16.7433	10.425	1.36333	2.135	1
Merged-chr1-10960664-5	chr1	10960325	10961101	FALSE	TRUE	TRUE	Intergenic	Intergenic	81381	NM_001170754	148345	Hs.127026	NM_173507	ENSG00000175262	C1orf127	-	chromosome 1 open reading frame 127	protein-coding	4.54	30.7033	13.645	4.91	3.49	6.01
Merged-chr1-11106271-3	chr1	11106016	11106444	FALSE	TRUE	FALSE	intron (NM_006610, intron 3 of 10)	AluSz|SINE|Alu	1066	NM_006610	10747	Hs.655645	NM_006610	ENSG00000009724	MASP2	MAP19|MASP-2|MASP1P1|sMAP	mannan binding lectin serine peptidase 2	protein-coding	3.735	13.6133	7.295	3.97	4.845	2
Merged-chr1-11327840-4	chr1	11327658	11328034	FALSE	TRUE	FALSE	Intergenic	LTR26|LTR|ERV1	-5238	NM_004958	2475	Hs.338207	NM_004958	ENSG00000198793	MTOR	FRAP|FRAP1|FRAP2|RAFT1|RAPT1|SKS	mechanistic target of rapamycin kinase	protein-coding	1.795	34.0333	14.075	5.75333	3.295	3.51
Merged-chr1-11413499-4	chr1	11413328	11413669	FALSE	FALSE	TRUE	Intergenic	MLT1L|LTR|ERVL-MaLR	80243	NM_001330350	29914	Hs.522933	NM_013319	ENSG00000120942	UBIAD1	SCCD|TERE1	UbiA prenyltransferase domain containing 1	protein-coding	1.465	14.6133	9.975	2.33667	1.36	0.5
Merged-chr1-11713646-4	chr1	11713427	11713847	FALSE	TRUE	FALSE	promoter-TSS (NM_001304791)	promoter-TSS (NM_001304791)	-795	NM_183412	93611	Hs.556006	NM_033182	ENSG00000132879	FBXO44	FBG3|FBX30|FBX6A|Fbx44|Fbxo6a	F-box protein 44	protein-coding	3.515	24.55	9.27	4.65333	2.91	8.02
Merged-chr1-12061725-5	chr1	12061399	12061924	FALSE	TRUE	TRUE	intron (NM_014874, intron 9 of 18)	intron (NM_014874, intron 9 of 18)	-17638	NM_021933	60672	Hs.8595	NM_021933	ENSG00000116691	MIIP	IIP45	migration and invasion inhibitory protein	protein-coding	3.33	30.37	14.235	3.69	1.55	3.01
Merged-chr1-12441383-4	chr1	12440943	12441793	FALSE	TRUE	FALSE	intron (NM_018156, intron 56 of 68)	intron (NM_018156, intron 56 of 68)	-125932	NR_003025	677885	Hs.658450	NR_003025	ENSG00000239149	SNORA59A	ACA59	small nucleolar RNA, H/ACA box 59A	snoRNA	7.435	38.9267	21.6	8.90667	10.275	7.52
Merged-chr1-12633942-3	chr1	12633546	12634220	FALSE	TRUE	FALSE	intron (NM_001324370, intron 4 of 5)	MIRc|SINE|MIR	5168	NR_106788	102466722		NR_106788	ENSG00000276830	MIR6730	hsa-mir-6730	microRNA 6730	ncRNA	1.325	23.2833	10.355	4.36667	1.94	2.51
Merged-chr1-12664485-3	chr1	12664293	12664636	FALSE	TRUE	FALSE	intron (NM_004753, intron 1 of 5)	intron (NM_004753, intron 1 of 5)	-8055	NM_001324370	9249	Hs.289347	NM_004753	ENSG00000162496	DHRS3	DD83.1|RDH17|Rsdr1|SDR1|SDR16C1|retSDR1	dehydrogenase/reductase 3	protein-coding	3.735	19.2167	10.385	4.38667	2.905	3.01
Merged-chr1-12805413-5	chr1	12805207	12805759	FALSE	TRUE	TRUE	promoter-TSS (NM_152290)	promoter-TSS (NM_152290)	-651	NM_152290	93190	Hs.98095	NM_152290	ENSG00000157330	C1orf158	-	chromosome 1 open reading frame 158	protein-coding	3.295	18.1567	12.195	2.88333	1.36	1.5
Merged-chr1-13977898-3	chr1	13977546	13978145	FALSE	TRUE	FALSE	Intergenic	L1MC4a|LINE|L1	-48890	NM_001135610	7799	Hs.371823	NM_012231	ENSG00000116731	PRDM2	HUMHOXY1|KMT8|KMT8A|MTB-ZF|RIZ|RIZ1|RIZ2	PR/SET domain 2	protein-coding	2.09	22.36	11.945	3.54333	1.55	6.01
Merged-chr1-15515324-3	chr1	15515147	15515541	FALSE	TRUE	FALSE	intron (NM_018022, intron 1 of 2)	intron (NM_018022, intron 1 of 2)	-17224	NM_001278502	727684	Hs.667584	NM_001278501		C1orf195	-	chromosome 1 open reading frame 195	protein-coding	1.795	14.7067	7.73	3.70333	1.94	2
Merged-chr1-15682942-4	chr1	15682719	15683242	FALSE	TRUE	FALSE	intron (NM_052929, intron 19 of 30)	LTR24|LTR|ERV1	-12601	NR_148919	101927417	Hs.715313	NR_148918	ENSG00000233485	LOC101927417	-	uncharacterized LOC101927417	ncRNA	4.355	30.9467	13.485	4.50667	4.46	4.01
Merged-chr1-15928157-4	chr1	15928004	15928323	FALSE	TRUE	FALSE	Intergenic	Intergenic	-15790	NM_032341	84301	Hs.718857	NM_032341	ENSG00000197312	DDI2	-	DNA damage inducible 1 homolog 2	protein-coding	1.245	12.1267	8.045	1.77667	1.165	3.01
Merged-chr1-16111775-5	chr1	16111642	16111915	FALSE	TRUE	TRUE	3' UTR (NM_001350151, exon 10 of 10)	3' UTR (NM_001350151, exon 10 of 10)	20784	NM_001024215	54751	Hs.530101	NM_017556	ENSG00000162458	FBLIM1	CAL|FBLP-1|FBLP1	filamin binding LIM protein 1	protein-coding	1.025	9.87333	7.685	0.823333	0.775	1
Merged-chr1-16114844-5	chr1	16114548	16115208	FALSE	TRUE	TRUE	Intergenic	AluSq2|SINE|Alu	19316	NM_001089591	440567	Hs.568229	NM_001089591	ENSG00000233954	UQCRHL	-	ubiquinol-cytochrome c reductase hinge protein like	protein-coding	8.76	47.3967	25.86	5.34	4.845	3.01
Merged-chr1-16123484-5	chr1	16123027	16123829	FALSE	TRUE	TRUE	Intergenic	L1MD3|LINE|L1	10766	NM_001089591	440567	Hs.568229	NM_001089591	ENSG00000233954	UQCRHL	-	ubiquinol-cytochrome c reductase hinge protein like	protein-coding	4.185	64.7133	34.905	6.44	4.85	5.01
Merged-chr1-16276440-5	chr1	16276191	16276744	FALSE	TRUE	TRUE	intron (NM_001287604, intron 2 of 15)	intron (NM_001287604, intron 2 of 15)	26160	NM_001324138	7709	Hs.433764	NM_003443	ENSG00000116809	ZBTB17	MIZ-1|ZNF151|ZNF60|pHZ-67	zinc finger and BTB domain containing 17	protein-coding	4.185	29.18	20.72	4.78	5.625	4.01
Merged-chr1-16676690-5	chr1	16676143	16677045	FALSE	TRUE	TRUE	intron (NM_018994, intron 1 of 9)	intron (NM_018994, intron 1 of 9)	2392	NM_018994	54455	Hs.522384	NM_018994	ENSG00000037637	FBXO42	Fbx42|JFK	F-box protein 42	protein-coding	5.175	71.0967	56.505	8.64	4.655	9.52
Merged-chr1-16934947-5	chr1	16934734	16935127	FALSE	TRUE	TRUE	intron (NM_017940, intron 2 of 28)	intron (NM_017940, intron 2 of 28)	5170	NM_017940	55672	Hs.467587	NM_017940	ENSG00000219481	NBPF1	AB13|AB14|AB23|AD2|NBG|NBPF	NBPF member 1	protein-coding	10.835	59.7467	30.075	16.3333	14.54	10.02
Merged-chr1-16978245-5	chr1	16977975	16978504	FALSE	TRUE	TRUE	Intergenic	MIRb|SINE|MIR	6170	NR_027504	11209	Hs.349110	NR_027504		MST1P2	MSPL-1|MSPL-2|MSPL-3|MSPL1|MSPL2|MSPL3|MSTP1|MSTP2|MSTP3	macrophage stimulating 1 pseudogene 2	pseudo	15.42	158.107	86.315	13.5833	11.825	14.53
Merged-chr1-17082176-5	chr1	17081984	17082479	FALSE	TRUE	TRUE	3' UTR (NM_001271733, exon 15 of 15)	3' UTR (NM_001271733, exon 15 of 15)	4321	NR_135824	102724562	Hs.349110	NR_135824		LOC102724562	-	macrophage stimulating 1 pseudogene	pseudo	4.55	33.01	18.29	5.46	6.01	10.52
Merged-chr1-17768127-5	chr1	17767568	17768731	FALSE	TRUE	TRUE	Intergenic	Intergenic	-1899	NM_018715	55920	Hs.380857	NM_018715	ENSG00000179051	RCC2	TD-60	regulator of chromosome condensation 2	protein-coding	8.35	125.99	81.215	6.95667	5.04	4.51
Merged-chr1-17908190-5	chr1	17907922	17908460	FALSE	TRUE	TRUE	intron (NM_001011722, intron 1 of 26)	MIRb|SINE|MIR	1143	NM_001011722	55160	Hs.443460	NM_018125	ENSG00000074964	ARHGEF10L	GrinchGEF	Rho guanine nucleotide exchange factor 10 like	protein-coding	5.855	59.4267	21.71	4.92	2.715	2.51
Merged-chr1-18347857-3	chr1	18347501	18348298	FALSE	TRUE	FALSE	Intergenic	MLT1I|LTR|ERVL-MaLR	-44252	NR_125946	101927876	Hs.522954	NR_125946	ENSG00000261781	LINC01654	-	long intergenic non-protein coding RNA 1654	ncRNA	2.72	24.6833	9.11	3.29	2.715	4.01
Merged-chr1-18455042-3	chr1	18454925	18455158	FALSE	TRUE	FALSE	intron (NM_032880, intron 1 of 9)	intron (NM_032880, intron 1 of 9)	20801	NM_032880	84966	Hs.212511	NM_032880	ENSG00000117154	IGSF21	-	immunoglobin superfamily member 21	protein-coding	2.855	10.0367	2.97	1.92333	1.555	0.5
Merged-chr1-19003174-4	chr1	19003009	19003357	FALSE	TRUE	FALSE	intron (NM_001135254, intron 4 of 8)	intron (NM_001135254, intron 4 of 8)	45683	NM_002584	5081	Hs.113253	NM_002584	ENSG00000009709	PAX7	HUP1|PAX7B|RMS2	paired box 7	protein-coding	0.81	11.0667	6.71	1.11333	0.97	1
Merged-chr1-19123672-3	chr1	19123502	19123802	FALSE	TRUE	FALSE	Intergenic	L1MD2|LINE|L1	62503	NM_152232	80834	Hs.553548	NM_152232	ENSG00000179002	TAS1R2	GPR71|T1R2|TR2	taste 1 receptor member 2	protein-coding	0.775	9.26	4.535	0.543333	1.355	1
Merged-chr1-19292442-5	chr1	19292195	19292711	FALSE	TRUE	TRUE	Intergenic	Intergenic	-9627	NM_001136265	126917	Hs.466625	NM_001136265	ENSG00000169991	IFFO2	-	intermediate filament family orphan 2	protein-coding	1.905	21.32	13.485	2.88333	2.325	2
Merged-chr1-19549637-5	chr1	19549441	19549866	FALSE	TRUE	TRUE	intron (NM_001271429, intron 18 of 21)	MIR|SINE|MIR	12773	NR_135115	101927895	Hs.660534	NR_135114	ENSG00000230424	LOC101927895	-	uncharacterized LOC101927895	ncRNA	5.265	21.6433	16.865	4.10667	2.91	4.01
Merged-chr1-19663129-4	chr1	19662997	19663273	FALSE	FALSE	TRUE	Intergenic	Intergenic	24395	NM_001040125	54896	Hs.647620	NM_017765	ENSG00000040487	PQLC2	-	PQ loop repeat containing 2	protein-coding	0.96	13.07	10.61	3.28667	1.745	1.5
Merged-chr1-19664796-5	chr1	19664439	19665051	FALSE	TRUE	TRUE	TTS (NM_001206540)	TTS (NM_001206540)	26005	NM_001040125	54896	Hs.647620	NM_017765	ENSG00000040487	PQLC2	-	PQ loop repeat containing 2	protein-coding	7.505	29.7267	22.985	4.93	3.875	5.01
Merged-chr1-19736453-6	chr1	19736223	19736737	TRUE	TRUE	TRUE	intron (NM_001206541, intron 3 of 8)	intron (NM_001206541, intron 3 of 8)	74721	NM_001282162	832	Hs.432760	NM_004930	ENSG00000077549	CAPZB	CAPB|CAPPB|CAPZ	capping actin protein of muscle Z-line subunit beta	protein-coding	9.625	47.81	24.345	4.39	3.3	5.51
Merged-chr1-20247856-5	chr1	20247509	20248200	FALSE	TRUE	TRUE	intron (NM_014589, intron 3 of 3)	MIRb|SINE|MIR	2256	NM_014589	30814	Hs.272372	NM_014589	ENSG00000188784	PLA2G2E	GIIE sPLA2|sPLA2-IIE	phospholipase A2 group IIE	protein-coding	3.735	42.0633	18.65	5.47333	3.685	5.51
Merged-chr1-20250180-4	chr1	20249918	20250378	FALSE	TRUE	FALSE	promoter-TSS (NM_014589)	promoter-TSS (NM_014589)	-38	NM_014589	30814	Hs.272372	NM_014589	ENSG00000188784	PLA2G2E	GIIE sPLA2|sPLA2-IIE	phospholipase A2 group IIE	protein-coding	4.99	24.98	12.49	3.30333	4.845	4.51
Merged-chr1-20278552-5	chr1	20278263	20278843	FALSE	TRUE	TRUE	Intergenic	Intergenic	27599	NM_001161729	5320	Hs.466804	NM_000300	ENSG00000188257	PLA2G2A	MOM1|PLA2|PLA2B|PLA2L|PLA2S|PLAS1|sPLA2	phospholipase A2 group IIA	protein-coding	5.79	29.4033	16.91	3.57333	2.91	2.51
Merged-chr1-20314421-3	chr1	20314316	20314550	FALSE	TRUE	FALSE	Intergenic	L1MC4a|LINE|L1	-7501	NM_000300	5320	Hs.466804	NM_000300	ENSG00000188257	PLA2G2A	MOM1|PLA2|PLA2B|PLA2L|PLA2S|PLAS1|sPLA2	phospholipase A2 group IIA	protein-coding	2.89	10.4933	3.215	2.06	2.905	2.51
Merged-chr1-20930853-3	chr1	20930467	20931159	FALSE	TRUE	FALSE	intron (NM_001785, intron 1 of 3)	MLT1A0|LTR|ERVL-MaLR	15369	NM_001785	978	Hs.466910	NM_001785	ENSG00000158825	CDA	CDD	cytidine deaminase	protein-coding	2.535	24.1433	6.305	5.63333	3.295	3.51
Merged-chr1-20933426-4	chr1	20933298	20933603	FALSE	FALSE	TRUE	intron (NM_001785, intron 2 of 3)	MamRep434|DNA|TcMar-Tigger	18006	NM_001785	978	Hs.466910	NM_001785	ENSG00000158825	CDA	CDD	cytidine deaminase	protein-coding	2.1	8.87	7.345	1.79	0.97	1.5
Merged-chr1-21116276-5	chr1	21115942	21116525	FALSE	TRUE	TRUE	Intergenic	AluSx1|SINE|Alu	-3052	NM_016287	50809	Hs.142442	NM_016287	ENSG00000127483	HP1BP3	HP1-BP74|HP1BP74	heterochromatin protein 1 binding protein 3	protein-coding	5.925	27.49	14.62	3.00667	3.685	2.51
Merged-chr1-21501684-5	chr1	21501340	21502180	FALSE	TRUE	TRUE	intron (NM_001198801, intron 2 of 34)	intron (NM_001198801, intron 2 of 34)	1621	NM_001198802	8672	Hs.467084	NM_003760	ENSG00000075151	EIF4G3	eIF-4G 3|eIF4G 3|eIF4GII	eukaryotic translation initiation factor 4 gamma 3	protein-coding	7.375	50.3333	30.735	6.82	6.395	10.02
Merged-chr1-21588528-5	chr1	21588177	21588861	FALSE	TRUE	TRUE	intron (NM_001113348, intron 4 of 18)	intron (NM_001113348, intron 4 of 18)	17664	NM_001113347	1889	Hs.195080	NM_001397	ENSG00000117298	ECE1	ECE	endothelin converting enzyme 1	protein-coding	10.515	45.9	31.415	6.44	3.49	7.02
Merged-chr1-21800646-3	chr1	21800498	21800790	FALSE	FALSE	TRUE	intron (NM_001256417, intron 6 of 13)	intron (NM_001256417, intron 6 of 13)	34061	NM_001256416	84224	Hs.325422	NM_032264	ENSG00000142794	NBPF3	AE2	NBPF member 3	protein-coding	0.995	4.92667	8.43	1.35333	0.58	1
Merged-chr1-21872698-3	chr1	21872441	21872961	FALSE	TRUE	FALSE	intron (NM_001177520, intron 1 of 9)	intron (NM_001177520, intron 1 of 9)	36850	NM_001177520	249	Hs.75431	NM_000478	ENSG00000162551	ALPL	AP-TNAP|APTNAP|HOPS|TNALP|TNAP|TNSALP	alkaline phosphatase, liver/bone/kidney	protein-coding	1.575	15.7667	6.73	1.93667	1.165	1.5
Merged-chr1-21997167-4	chr1	21996946	21997403	FALSE	TRUE	FALSE	Intergenic	Intergenic	-1301	NM_001350528	5909	Hs.148178	NM_002885	ENSG00000076864	RAP1GAP	RAP1GA1|RAP1GAP1|RAP1GAPII|RAPGAP	RAP1 GTPase activating protein	protein-coding	2.89	13.3067	11.945	2.99667	3.685	3.01
Merged-chr1-23428041-4	chr1	23427855	23428208	FALSE	FALSE	TRUE	intron (NM_001142546, intron 2 of 3)	MIRb|SINE|MIR	-43604	NR_039614	NA								1.905	11.58	10.95	1.77667	1.745	1.5
Merged-chr1-23503786-3	chr1	23503589	23504100	FALSE	TRUE	FALSE	Intergenic	Intergenic	-8493	NM_033631	7798	Hs.257900	NM_033631	ENSG00000169641	LUZP1	LUZP	leucine zipper protein 1	protein-coding	4.39	16.78	7.39	3.01	2.715	4.01
Merged-chr1-23548987-5	chr1	23548641	23549192	FALSE	TRUE	TRUE	Intergenic	MIR|SINE|MIR	-27694	NM_000864	3352	Hs.121482	NM_000864	ENSG00000179546	HTR1D	5-HT1D|HT1DA|HTR1DA|HTRL|RDC4	5-hydroxytryptamine receptor 1D	protein-coding	4	37.1667	21.555	5.61333	4.265	3.01
Merged-chr1-23551620-3	chr1	23551509	23551762	FALSE	TRUE	FALSE	Intergenic	Intergenic	-30413	NM_000864	3352	Hs.121482	NM_000864	ENSG00000179546	HTR1D	5-HT1D|HT1DA|HTR1DA|HTRL|RDC4	5-hydroxytryptamine receptor 1D	protein-coding	1.87	12.7267	5.35	2.87	1.55	1
Merged-chr1-23805515-6	chr1	23805258	23805753	TRUE	TRUE	TRUE	intron (NM_001143778, intron 1 of 23)	intron (NM_001143778, intron 1 of 23)	5245	NM_017707	55616	Hs.437379	NM_017707	ENSG00000088280	ASAP3	ACAP4|CENTB6|DDEFL1|UPLC1	ArfGAP with SH3 domain, ankyrin repeat and PH domain 3	protein-coding	9.15	41.2667	19.13	5.88333	3.1	2.51
Merged-chr1-23915406-5	chr1	23915236	23915553	FALSE	TRUE	TRUE	Intergenic	Intergenic	-29109	NM_002167	3399	Hs.76884	NM_002167	ENSG00000117318	ID3	HEIR-1|bHLHb25	inhibitor of DNA binding 3, HLH protein	protein-coding	1.21	8.85	7.55	0.686667	1.745	0.5
Merged-chr1-24024351-5	chr1	24024134	24024529	FALSE	TRUE	TRUE	Intergenic	Intergenic	6062	NM_001199802	6135	Hs.719951	NM_000975	ENSG00000142676	RPL11	DBA7|GIG34|L11|uL5	ribosomal protein L11	protein-coding	2.825	14.27	12.94	1.24	2.33	0.5
Merged-chr1-24079636-5	chr1	24079453	24079828	FALSE	TRUE	TRUE	intron (NM_003198, intron 5 of 10)	AluJb|SINE|Alu	9784	NM_003198	6924	Hs.15535	NM_003198	ENSG00000011007	ELOA	SIII|SIII p110|TCEB3|TCEB3A	elongin A	protein-coding	2.89	14.46	12.785	2.32667	2.325	2
Merged-chr1-24289686-4	chr1	24289503	24289824	FALSE	FALSE	TRUE	3' UTR (NM_017761, exon 3 of 3)	3' UTR (NM_017761, exon 3 of 3)	3362	NM_017761	55629	Hs.7862	NM_017761	ENSG00000189266	PNRC2	-	proline rich nuclear receptor coactivator 2	protein-coding	2.455	9.56	8.795	0.55	1.36	1.5
Merged-chr1-24477767-4	chr1	24477639	24477919	FALSE	TRUE	FALSE	Intergenic	LTR10D|LTR|ERV1	-8004	NM_021258	58985	Hs.110915	NM_021258	ENSG00000142677	IL22RA1	CRF2-9|IL22R|IL22R1	interleukin 22 receptor subunit alpha 1	protein-coding	1.43	12.3333	8.345	3.03333	2.71	1
Merged-chr1-24505155-5	chr1	24504946	24505370	FALSE	TRUE	TRUE	intron (NM_173065, intron 2 of 5)	L1MC5|LINE|L1	8607	NM_170743	163702	Hs.221375	NM_170743	ENSG00000185436	IFNLR1	CRF2/12|IFNLR|IL-28R1|IL28RA|LICR2	interferon lambda receptor 1	protein-coding	2.015	29.4233	14.98	2.47	1.55	4.01
Merged-chr1-24656882-2	chr1	24656753	24656987	FALSE	FALSE	TRUE	intron (NM_021180, intron 1 of 15)	intron (NM_021180, intron 1 of 15)	7340	NM_021180	57822	Hs.657920	NM_021180	ENSG00000158055	GRHL3	SOM|TFCP2L4|VWS2	grainyhead like transcription factor 3	protein-coding	0.625	4.03333	6.89	0.55	0.78	0.5
Merged-chr1-24867673-3	chr1	24867533	24867887	FALSE	TRUE	FALSE	intron (NR_109781, intron 2 of 2)	intron (NR_109781, intron 2 of 2)	14805	NR_109781	100506985	Hs.607088	NR_109781		LOC100506985	-	uncharacterized LOC100506985	ncRNA	4.76	14.4767	6.21	5.06667	4.455	6.01
Merged-chr1-24875897-5	chr1	24875710	24876097	FALSE	TRUE	TRUE	intron (NR_109781, intron 2 of 2)	AluSz|SINE|Alu	6612	NR_109781	100506985	Hs.607088	NR_109781		LOC100506985	-	uncharacterized LOC100506985	ncRNA	3.225	24.6467	17.18	3.03333	3.1	4.01
Merged-chr1-24936617-5	chr1	24936425	24936759	FALSE	TRUE	TRUE	TTS (NM_001010980)	TTS (NM_001010980)	-33002	NM_005839	10250	Hs.18192	NM_005839	ENSG00000133226	SRRM1	160-KD|POP101|SRM160	serine and arginine repetitive matrix 1	protein-coding	1.835	12.42	8.48	1.8	0.39	3.51
Merged-chr1-25058895-4	chr1	25058747	25059068	FALSE	TRUE	FALSE	Intergenic	Intergenic	-12853	NM_013943	25932	Hs.440544	NM_013943	ENSG00000169504	CLIC4	CLIC4L|H1|MTCLIC|huH1|p64H1	chloride intracellular channel 4	protein-coding	2.015	11.28	9.61	1.79667	1.355	2
Merged-chr1-25072798-5	chr1	25072464	25073185	FALSE	TRUE	TRUE	intron (NM_013943, intron 1 of 5)	intron (NM_013943, intron 1 of 5)	1064	NM_013943	25932	Hs.440544	NM_013943	ENSG00000169504	CLIC4	CLIC4L|H1|MTCLIC|huH1|p64H1	chloride intracellular channel 4	protein-coding	9.27	31.2067	30.325	5.21	5.04	4.51
Merged-chr1-25417702-5	chr1	25417393	25417992	FALSE	TRUE	TRUE	Intergenic	MIR3|SINE|MIR	67698	NR_039623	100616365		NR_039623	ENSG00000264371	MIR4425	-	microRNA 4425	ncRNA	2.165	44.08	19.13	4.79333	1.745	2
Merged-chr1-25668493-5	chr1	25668323	25668682	FALSE	TRUE	TRUE	intron (NM_014313, intron 2 of 6)	intron (NM_014313, intron 2 of 6)	3713	NM_014313	23585	Hs.705699	NM_014313	ENSG00000183726	TMEM50A	IFNRC|SMP1	transmembrane protein 50A	protein-coding	1.395	16.5867	12.105	2.05667	2.33	2
Merged-chr1-25895117-5	chr1	25894854	25895461	FALSE	FALSE	TRUE	3' UTR (NM_015627, exon 9 of 9)	3' UTR (NM_015627, exon 9 of 9)	25081	NM_015627	26119	Hs.590911	NM_015627	ENSG00000157978	LDLRAP1	ARH|ARH1|ARH2|FHCB1|FHCB2	low density lipoprotein receptor adaptor protein 1	protein-coding	3.11	17.3133	16.365	4.4	4.07	3.51
Merged-chr1-26564356-5	chr1	26564116	26564543	FALSE	TRUE	TRUE	intron (NM_001281517, intron 1 of 12)	intron (NM_001281517, intron 1 of 12)	3685	NM_001281517	64793	Hs.63795	NM_022778	ENSG00000130695	CEP85	CCDC21	centrosomal protein 85	protein-coding	3.85	17.2967	18.065	3.56333	1.94	2.51
Merged-chr1-26714057-5	chr1	26713738	26714311	TRUE	TRUE	FALSE	Intergenic	AluSq2|SINE|Alu	-14739	NM_173574	257101	Hs.353208	NM_173574	ENSG00000176083	ZNF683	Hobit	zinc finger protein 683	protein-coding	9.775	41.8367	18.2	5.86	4.46	3.01
Merged-chr1-26814059-6	chr1	26813838	26814290	TRUE	TRUE	TRUE	Intergenic	Tigger7|DNA|TcMar-Tigger	15162	NM_005517	3151	Hs.181163	NM_005517	ENSG00000198830	HMGN2	HMG17	high mobility group nucleosomal binding domain 2	protein-coding	6.995	33.8267	23.03	1.92	1.745	2
Merged-chr1-27208407-5	chr1	27208008	27208682	FALSE	TRUE	TRUE	intron (NM_018066, intron 4 of 4)	AluJb|SINE|Alu	8524	NM_018066	54707	Hs.14333	NM_018066	ENSG00000142751	GPN2	ATPBD1B	GPN-loop GTPase 2	protein-coding	5.45	31.9033	21.69	5.19667	2.52	5.51
Merged-chr1-27230810-5	chr1	27230501	27231128	FALSE	TRUE	TRUE	Intergenic	AluSz|SINE|Alu	-3852	NM_022078	63906	Hs.10903	NM_022078	ENSG00000198746	GPATCH3	GPATC3	G-patch domain containing 3	protein-coding	10.615	48.1933	30.53	5.90333	4.265	1.5
Merged-chr1-27482040-5	chr1	27481688	27482478	FALSE	TRUE	TRUE	promoter-TSS (NM_003047)	promoter-TSS (NM_003047)	-462	NM_003047	6548	Hs.469116	NM_003047	ENSG00000090020	SLC9A1	APNH|LIKNS|NHE-1|NHE1|PPP1R143	solute carrier family 9 member A1	protein-coding	8.645	81.0367	32.66	8.38667	6.785	6.01
Merged-chr1-27518750-3	chr1	27518482	27519009	FALSE	TRUE	FALSE	Intergenic	Intergenic	-37124	NM_003047	6548	Hs.469116	NM_003047	ENSG00000090020	SLC9A1	APNH|LIKNS|NHE-1|NHE1|PPP1R143	solute carrier family 9 member A1	protein-coding	3.33	30.8233	12.24	5.06333	3.295	1.5
Merged-chr1-28260515-5	chr1	28260232	28260697	FALSE	TRUE	TRUE	Intergenic	AluJb|SINE|Alu	-1002	NM_001304579	27293	Hs.123659	NM_014474	ENSG00000130768	SMPDL3B	ASML3B	sphingomyelin phosphodiesterase acid like 3B	protein-coding	1.28	17.3633	12.735	2.21	1.745	1
Merged-chr1-28270103-4	chr1	28269909	28270272	FALSE	TRUE	FALSE	intron (NM_001009568, intron 1 of 6)	intron (NM_001009568, intron 1 of 6)	8624	NM_001009568	27293	Hs.123659	NM_014474	ENSG00000130768	SMPDL3B	ASML3B	sphingomyelin phosphodiesterase acid like 3B	protein-coding	3.33	20.3267	9.225	3.83333	3.49	2
Merged-chr1-28439410-4	chr1	28439222	28439571	FALSE	TRUE	FALSE	Intergenic	Intergenic	-24248	NM_001282560	2140	Hs.185774	NM_001990	ENSG00000158161	EYA3	-	EYA transcriptional coactivator and phosphatase 3	protein-coding	0.995	14.6033	8.795	4.11667	1.55	3.01
Merged-chr1-28576093-6	chr1	28575557	28576639	TRUE	TRUE	TRUE	Intergenic	Intergenic	-9865	NM_031459	83667	Hs.469543	NM_031459	ENSG00000130766	SESN2	HI95|SES2|SEST2	sestrin 2	protein-coding	16.44	91.78	65.665	7.7	5.235	7.52
Merged-chr1-28586067-9	chr1	28585321	28586870	TRUE	TRUE	TRUE	5' UTR (NM_031459, exon 1 of 10)	5' UTR (NM_031459, exon 1 of 10)	132	NM_031459	83667	Hs.469543	NM_031459	ENSG00000130766	SESN2	HI95|SES2|SEST2	sestrin 2	protein-coding	24.275	182.163	108.865	12.4167	12.405	15.54
Merged-chr1-28609114-4	chr1	28608951	28609272	FALSE	FALSE	TRUE	TTS (NM_031459)	TTS (NM_031459)	23148	NM_031459	83667	Hs.469543	NM_031459	ENSG00000130766	SESN2	HI95|SES2|SEST2	sestrin 2	protein-coding	1.98	9.19	10.995	1.79667	1.16	0.5
Merged-chr1-28653650-4	chr1	28653422	28653942	FALSE	TRUE	FALSE	Intergenic	L2b|LINE|L2	-1831	NM_001127350	54797	Hs.479911	NM_017638	ENSG00000130772	MED18	SRB5|p28b	mediator complex subunit 18	protein-coding	2.455	25.7367	15.62	5.35333	1.745	4.01
Merged-chr1-28718728-4	chr1	28718590	28718966	FALSE	TRUE	FALSE	intron (NM_001350161, intron 1 of 14)	MER44C|DNA|TcMar-Tigger	22713	NM_001350159	65979	Hs.225641	NM_023923	ENSG00000204138	PHACTR4	PPP1R124	phosphatase and actin regulator 4	protein-coding	1.18	12.88	6.19	2.75333	2.135	2.51
Merged-chr1-28744102-5	chr1	28743932	28744358	FALSE	TRUE	TRUE	intron (NM_001350160, intron 3 of 14)	MER44B|DNA|TcMar-Tigger	-20516	NM_023923	65979	Hs.225641	NM_023923	ENSG00000204138	PHACTR4	PPP1R124	phosphatase and actin regulator 4	protein-coding	1.905	21.7633	15.73	3.03333	2.52	3.01
Merged-chr1-28796775-5	chr1	28796518	28796961	FALSE	TRUE	TRUE	intron (NM_001350161, intron 7 of 14)	AluJr4|SINE|Alu	32078	NM_023923	65979	Hs.225641	NM_023923	ENSG00000204138	PHACTR4	PPP1R124	phosphatase and actin regulator 4	protein-coding	2.275	20.0067	10.95	3.54667	2.715	2.51
Merged-chr1-29300629-4	chr1	29300439	29300844	FALSE	FALSE	TRUE	intron (NM_001166006, intron 1 of 14)	L3|LINE|CR1	59553	NM_001166006	2035	Hs.175437	NM_004437	ENSG00000159023	EPB41	4.1R|EL1|HE	erythrocyte membrane protein band 4.1	protein-coding	1.65	12.9467	16.185	4.1	1.355	2.51
Merged-chr1-29472640-3	chr1	29472434	29472822	FALSE	TRUE	FALSE	Intergenic	Intergenic	-22207	NM_001003682	399474	Hs.712722	NM_001003682	ENSG00000253304	TMEM200B	TTMB	transmembrane protein 200B	protein-coding	3.815	17.9733	6.755	4.39667	4.845	3.01
Merged-chr1-29801043-5	chr1	29800801	29801350	FALSE	TRUE	TRUE	Intergenic	Intergenic	-124449	NR_110758	101928460	Hs.434659	NR_110758	ENSG00000230523	LINC01756	-	long intergenic non-protein coding RNA 1756	ncRNA	4.325	20.22	13.24	2.87	3.485	2.51
Merged-chr1-30266195-6	chr1	30265955	30266511	TRUE	TRUE	TRUE	Intergenic	LTR41B|LTR|ERVL	244226	NR_110790	101929406	Hs.639413	NR_110790	ENSG00000233399	LINC01648	-	long intergenic non-protein coding RNA 1648	ncRNA	10.64	44.4	31.8	3.53667	3.3	4.51
Merged-chr1-31544094-4	chr1	31543823	31544260	FALSE	FALSE	TRUE	Intergenic	Intergenic	-5477	NM_014676	9698	Hs.281707	NM_014676	ENSG00000134644	PUM1	HSPUM|PUMH|PUMH1|PUML1	pumilio RNA binding family member 1	protein-coding	1.395	11.29	12.24	1.79	1.165	1.5
Merged-chr1-32018271-4	chr1	32018072	32018468	FALSE	FALSE	TRUE	Intergenic	MLT1H2|LTR|ERVL-MaLR	-23816	NM_001204414	64129	Hs.199368	NM_022164	ENSG00000142910	TINAGL1	ARG1|LCN7|LIECG3|TINAGRP	tubulointerstitial nephritis antigen like 1	protein-coding	1.795	11.4	11.855	1.51	1.355	3.01
Merged-chr1-32170568-4	chr1	32170357	32170825	FALSE	TRUE	FALSE	promoter-TSS (NM_001856)	promoter-TSS (NM_001856)	-823	NM_001856	1307	Hs.368921	NM_001856	ENSG00000084636	COL16A1	447AA|FP1572	collagen type XVI alpha 1 chain	protein-coding	3.955	32.4867	16.095	4.24667	3.295	6.52
Merged-chr1-32420438-5	chr1	32420200	32420702	FALSE	TRUE	TRUE	Intergenic	Intergenic	-16463	NM_080391	8073	Hs.470477	NM_003479	ENSG00000184007	PTP4A2	HH13|HH7-2|HU-PP-1|OV-1|PRL-2|PRL2|PTP4A|PTPCAAX2|ptp-IV1a|ptp-IV1b	protein tyrosine phosphatase type IVA, member 2	protein-coding	6.375	40.78	24.39	4.38333	3.68	7.52
Merged-chr1-32644101-3	chr1	32643921	32644295	FALSE	TRUE	FALSE	Intergenic	Intergenic	-1237	NM_175852	200081	Hs.17987	NM_175852	ENSG00000084652	TXLNA	IL14|TXLN	taxilin alpha	protein-coding	5.165	20.7333	6.05	3.15333	3.49	1.5
Merged-chr1-32651827-5	chr1	32651509	32652187	FALSE	TRUE	TRUE	intron (NM_175852, intron 4 of 10)	L2|LINE|L2	6503	NM_175852	200081	Hs.17987	NM_175852	ENSG00000084652	TXLNA	IL14|TXLN	taxilin alpha	protein-coding	4.425	24.8433	21.915	2.59667	1.745	4.01
Merged-chr1-32872599-4	chr1	32872344	32872786	FALSE	TRUE	FALSE	Intergenic	ERVL-E-int|LTR|ERVL	-12503	NM_018045	55108	Hs.353454	NM_018045	ENSG00000160058	BSDC1	-	BSD domain containing 1	protein-coding	2.49	24.45	8.52	4.93667	3.88	7.02
Merged-chr1-33157388-4	chr1	33157225	33157529	FALSE	FALSE	TRUE	intron (NM_030786, intron 2 of 4)	MER33|DNA|hAT-Charlie	10984	NM_001161708	81493	Hs.712631	NM_030786	ENSG00000162520	SYNC	SYNC1|SYNCOILIN	syncoilin, intermediate filament protein	protein-coding	1.095	8.63333	10.045	1.64	1.555	0.5
Merged-chr1-33280042-5	chr1	33279804	33280348	FALSE	TRUE	TRUE	intron (NM_003680, intron 1 of 12)	AluSx1|SINE|Alu	-2967	NM_001256121	64766	Hs.440880	NM_022753	ENSG00000116497	S100PBP	S100PBPR	S100P binding protein	protein-coding	7.48	40.23	23.185	4.26333	3.105	7.02
Merged-chr1-33282888-6	chr1	33282494	33283151	TRUE	TRUE	TRUE	promoter-TSS (NM_001256121)	promoter-TSS (NM_001256121)	-221	NM_001256121	64766	Hs.440880	NM_022753	ENSG00000116497	S100PBP	S100PBPR	S100P binding protein	protein-coding	28.395	99.09	85.335	6.56333	6.595	7.02
Merged-chr1-33378674-5	chr1	33378437	33379008	FALSE	TRUE	TRUE	Intergenic	Charlie1a|DNA|hAT-Charlie	-11681	NM_001329723	113452	Hs.534521	NM_033504	ENSG00000121900	TMEM54	BCLP|CAC-1|CAC1	transmembrane protein 54	protein-coding	2.855	27.9133	14.435	2.03333	0.78	1
Merged-chr1-33516084-5	chr1	33515758	33516513	FALSE	TRUE	TRUE	Intergenic	MLT1J|LTR|ERVL-MaLR	-13623	NM_001319140	204	Hs.470907	NM_001625	ENSG00000004455	AK2	ADK2	adenylate kinase 2	protein-coding	5.35	68.21	39.96	7.41667	4.07	2.51
Merged-chr1-33722626-3	chr1	33722480	33722814	FALSE	TRUE	FALSE	intron (NM_152493, intron 1 of 8)	intron (NM_152493, intron 1 of 8)	473	NM_152493	149076	Hs.743358	NM_152493	ENSG00000160094	ZNF362	RN|lin-29	zinc finger protein 362	protein-coding	2.89	10.3367	5.01	1.79	3.105	3.51
Merged-chr1-33813074-5	chr1	33812544	33813397	FALSE	TRUE	TRUE	intron (NM_198040, intron 8 of 13)	intron (NM_198040, intron 8 of 13)	2529	NM_004427	1912	Hs.524271	NM_004427	ENSG00000134686	PHC2	EDR2|HPH2|PH2	polyhomeotic homolog 2	protein-coding	12.245	43.3033	32.075	8.08667	9.11	7.02
Merged-chr1-36473255-5	chr1	36473103	36473460	FALSE	TRUE	TRUE	intron (NM_177422, intron 4 of 16)	AluSq2|SINE|Alu	-76395	NM_014466	27285	Hs.127111	NM_014466	ENSG00000092850	TEKT2	TEKTB1|TEKTIN-T|h-tektin-t	tektin 2	protein-coding	3.075	13.9	13.645	2.76	1.745	2.51
Merged-chr1-36659060-4	chr1	36658857	36659256	FALSE	TRUE	FALSE	Intergenic	Zaphod3|DNA|hAT-Tip100	-30957	NM_001321471	9967	Hs.744057	NM_005119	ENSG00000054118	THRAP3	BCLAF2|TRAP150	thyroid hormone receptor associated protein 3	protein-coding	1.575	12.9633	10.695	2.07	3.105	1.5
Merged-chr1-36683925-5	chr1	36683642	36684221	FALSE	TRUE	TRUE	Intergenic	AluSx1|SINE|Alu	-6082	NM_001321471	9967	Hs.744057	NM_005119	ENSG00000054118	THRAP3	BCLAF2|TRAP150	thyroid hormone receptor associated protein 3	protein-coding	3.735	42.56	32.64	3.02	2.905	3.01
Merged-chr1-36714307-5	chr1	36713908	36714774	FALSE	TRUE	TRUE	intron (NM_001321471, intron 2 of 12)	intron (NM_001321471, intron 2 of 12)	24324	NM_005119	9967	Hs.744057	NM_005119	ENSG00000054118	THRAP3	BCLAF2|TRAP150	thyroid hormone receptor associated protein 3	protein-coding	15.63	100.733	60.295	10.2933	8.915	6.01
Merged-chr1-36735238-3	chr1	36735095	36735357	FALSE	TRUE	FALSE	intron (NM_005119, intron 2 of 11)	AluJo|SINE|Alu	-36768	NM_001162530	79729	Hs.524496	NM_024676	ENSG00000214193	SH3D21	C1orf113	SH3 domain containing 21	protein-coding	3.84	10.0733	5.625	2.06	1.94	0
Merged-chr1-36852226-6	chr1	36851963	36852525	TRUE	TRUE	TRUE	promoter-TSS (NM_032017)	promoter-TSS (NM_032017)	-716	NM_001282546	83931	Hs.471768	NM_032017	ENSG00000196182	STK40	SHIK|SgK495	serine/threonine kinase 40	protein-coding	23.785	103.823	68.2	8.6	6.205	7.52
Merged-chr1-36930059-4	chr1	36929881	36930294	FALSE	FALSE	TRUE	promoter-TSS (NM_031280)	promoter-TSS (NM_031280)	-47	NM_031280	64960	Hs.352839	NM_031280	ENSG00000116898	MRPS15	DC37|MPR-S15|RPMS15|S15mt	mitochondrial ribosomal protein S15	protein-coding	3.7	18.91	16.775	4.52667	4.075	4.51
Merged-chr1-37986074-5	chr1	37985755	37986317	FALSE	TRUE	TRUE	Intergenic	AluSq2|SINE|Alu	-5616	NM_022756	64769	Hs.17118	NM_022756	ENSG00000163875	MEAF6	C1orf149|CENP-28|EAF6|NY-SAR-91	MYST/Esa1 associated factor 6	protein-coding	3.04	15.9367	13.01	1.77667	2.52	2
Merged-chr1-38157905-4	chr1	38157775	38158042	FALSE	FALSE	TRUE	promoter-TSS (NM_001350765)	promoter-TSS (NM_001350765)	38	NM_001350767	54955	Hs.272673	NM_017850	ENSG00000116922	C1orf109	-	chromosome 1 open reading frame 109	protein-coding	4.61	13.3567	12.24	2.85	2.325	2.51
Merged-chr1-38328219-3	chr1	38328076	38328402	FALSE	TRUE	FALSE	intron (NM_001350228, intron 20 of 20)	Tigger3a|DNA|TcMar-Tigger	-2947	NM_005955	4520	Hs.471991	NM_005955	ENSG00000188786	MTF1	MTF-1|ZRF	metal regulatory transcription factor 1	protein-coding	2.2	24.5967	8.005	4.11333	1.55	1
Merged-chr1-38412595-6	chr1	38412327	38412876	TRUE	TRUE	TRUE	intron (NM_005540, intron 1 of 23)	intron (NM_005540, intron 1 of 23)	128	NM_005540	3633	Hs.449942	NM_005540	ENSG00000204084	INPP5B	5PTase	inositol polyphosphate-5-phosphatase B	protein-coding	11.39	35.2533	31.665	5.88	6.785	2.51
Merged-chr1-38453544-5	chr1	38453338	38453830	FALSE	TRUE	TRUE	intron (NM_006802, intron 2 of 16)	intron (NM_006802, intron 2 of 16)	2198	NM_001320830	10946	Hs.77897	NM_006802	ENSG00000183431	SF3A3	PRP9|PRPF9|SAP61|SF3a60	splicing factor 3a subunit 3	protein-coding	6.48	32.1533	21.6	4.11333	2.325	1.5
Merged-chr1-38721228-4	chr1	38721001	38721405	FALSE	TRUE	FALSE	Intergenic	Intergenic	-40764	NR_038928	339442	Hs.434245	NR_038928	ENSG00000237290	LINC01343	-	long intergenic non-protein coding RNA 1343	ncRNA	2.67	17.6867	8.615	2.22333	0.39	2
Merged-chr1-39644725-4	chr1	39644462	39644880	FALSE	TRUE	FALSE	intron (NM_012090, intron 1 of 92)	intron (NM_012090, intron 1 of 92)	94832	NM_012090	23499	Hs.472475	NM_012090	ENSG00000127603	MACF1	ABP620|ACF7|MACF|OFC4	microtubule-actin crosslinking factor 1	protein-coding	3.04	19.9467	12.735	5.34333	3.49	2
Merged-chr1-39649473-3	chr1	39649165	39649819	FALSE	TRUE	FALSE	intron (NM_012090, intron 1 of 92)	intron (NM_012090, intron 1 of 92)	99653	NM_012090	23499	Hs.472475	NM_012090	ENSG00000127603	MACF1	ABP620|ACF7|MACF|OFC4	microtubule-actin crosslinking factor 1	protein-coding	4.805	36.92	10.61	5.75667	4.07	6.01
Merged-chr1-39658173-5	chr1	39657901	39658424	FALSE	TRUE	TRUE	intron (NM_012090, intron 1 of 92)	intron (NM_012090, intron 1 of 92)	108323	NM_012090	23499	Hs.472475	NM_012090	ENSG00000127603	MACF1	ABP620|ACF7|MACF|OFC4	microtubule-actin crosslinking factor 1	protein-coding	3.77	21.06	9.93	5.76	3.49	6.52
Merged-chr1-39735863-5	chr1	39735604	39736106	FALSE	TRUE	TRUE	intron (NM_012090, intron 5 of 92)	intron (NM_012090, intron 5 of 92)	-139321	NM_015038	643314	Hs.658760	NM_015038	ENSG00000127603	KIAA0754	-	KIAA0754	protein-coding	4.07	27.68	22.645	4.09	3.685	2
Merged-chr1-39864552-5	chr1	39864346	39864733	FALSE	TRUE	TRUE	intron (NM_012090, intron 52 of 92)	intron (NM_012090, intron 52 of 92)	-10637	NM_015038	643314	Hs.658760	NM_015038	ENSG00000127603	KIAA0754	-	KIAA0754	protein-coding	2.525	26.7033	16.16	4.94	4.455	3.01
Merged-chr1-39954555-5	chr1	39954208	39954800	FALSE	TRUE	TRUE	Intergenic	AluSq2|SINE|Alu	-2814	NM_181809	353500	Hs.472497	NM_181809	ENSG00000183682	BMP8A	-	bone morphogenetic protein 8a	protein-coding	3.38	16.94	15.005	0.963333	1.94	2.51
Merged-chr1-40034066-4	chr1	40033888	40034223	FALSE	TRUE	FALSE	promoter-TSS (NR_002983)	promoter-TSS (NR_002983)	-873	NR_002983	677834	Hs.676660	NR_002983	ENSG00000201457	SNORA55	ACA55	small nucleolar RNA, H/ACA box 55	snoRNA	2.2	14.07	7.095	2.31	1.555	2
Merged-chr1-40779195-5	chr1	40778946	40779424	FALSE	TRUE	TRUE	intron (NM_001852, intron 4 of 31)	intron (NM_001852, intron 4 of 31)	3754	NM_001852	1298	Hs.418012	NM_001852	ENSG00000049089	COL9A2	DJ39G22.4|EDM2|MED|STL5	collagen type IX alpha 2 chain	protein-coding	3.515	27.21	23.37	4.25667	3.49	4.51
Merged-chr1-40818949-4	chr1	40818755	40819159	FALSE	FALSE	TRUE	Intergenic	MLT1L|LTR|ERVL-MaLR	-20421	NM_022733	64744	Hs.15200	NM_022733	ENSG00000084070	SMAP2	SMAP1L	small ArfGAP2	protein-coding	3.11	7.77333	8.77	1.79	1.55	1.5
Merged-chr1-40860827-4	chr1	40860551	40861117	FALSE	FALSE	TRUE	intron (NM_001198979, intron 1 of 9)	intron (NM_001198979, intron 1 of 9)	-1638	NM_001198980	64744	Hs.15200	NM_022733	ENSG00000084070	SMAP2	SMAP1L	small ArfGAP2	protein-coding	1.98	13.3233	11.15	3.12667	2.52	2.51
Merged-chr1-40877712-4	chr1	40877571	40877865	FALSE	FALSE	TRUE	intron (NM_001198980, intron 4 of 9)	L1ME4a|LINE|L1	15246	NM_001198980	64744	Hs.15200	NM_022733	ENSG00000084070	SMAP2	SMAP1L	small ArfGAP2	protein-coding	2.42	6.63333	10.995	1.92333	1.745	1.5
Merged-chr1-40916709-5	chr1	40916325	40917065	FALSE	TRUE	TRUE	exon (NM_023070, exon 1 of 5)	exon (NM_023070, exon 1 of 5)	358	NM_023070	65243	Hs.133034	NM_023070	ENSG00000187801	ZFP69B	ZKSCAN23B|ZNF643|ZSCAN54B	ZFP69 zinc finger protein B	protein-coding	10.33	41.7833	37.76	4.67	6.395	6.01
Merged-chr1-41215134-5	chr1	41214712	41215400	FALSE	TRUE	TRUE	intron (NM_001142589, intron 3 of 8)	intron (NM_001142589, intron 3 of 8)	-4971	NR_029846	407034		NR_029846	ENSG00000198974	MIR30E	MIRN30E|mir-30e	microRNA 30e	ncRNA	4.51	28.7733	12.92	3.03333	3.1	3.51
Merged-chr1-41380852-5	chr1	41380534	41381149	FALSE	TRUE	TRUE	Intergenic	Intergenic	-52823	NM_133467	163732	Hs.355820	NM_133467	ENSG00000179862	CITED4	-	Cbp/p300 interacting transactivator with Glu/Asp rich carboxy-terminal domain 4	protein-coding	4.585	32.5033	18.11	2.88333	2.91	3.51
Merged-chr1-41575801-4	chr1	41575487	41575999	FALSE	FALSE	TRUE	intron (NM_001172222, intron 4 of 10)	intron (NM_001172222, intron 4 of 10)	51361	NM_001172222	22955	Hs.571874	NM_012236	ENSG00000010803	SCMH1	Scml3	Scm polycomb group protein homolog 1	protein-coding	3.885	20.89	14.01	4.78667	4.07	5.01
Merged-chr1-41618739-5	chr1	41618230	41619065	FALSE	TRUE	TRUE	intron (NM_001031694, intron 3 of 15)	intron (NM_001031694, intron 3 of 15)	8457	NM_001172222	22955	Hs.571874	NM_012236	ENSG00000010803	SCMH1	Scml3	Scm polycomb group protein homolog 1	protein-coding	5.46	73.8933	36.265	9.06	4.265	5.01
Merged-chr1-41799246-5	chr1	41798917	41799540	FALSE	TRUE	TRUE	Intergenic	MLT1K|LTR|ERVL-MaLR	-28375	NM_001291281	100132074	Hs.559677	NM_001291281		FOXO6	-	forkhead box O6	protein-coding	3.93	24.08	12.355	2.19667	2.52	2.51
Merged-chr1-42115314-2	chr1	42115197	42115443	FALSE	FALSE	TRUE	intron (NM_001127714, intron 1 of 7)	intron (NM_001127714, intron 1 of 7)	-164966	NM_001956	1907	Hs.1407	NM_001956	ENSG00000127129	EDN2	ET-2|ET2|PPET2	endothelin 2	protein-coding	0.555	2.39667	6.415	0.966667	0.58	1
Merged-chr1-42995609-5	chr1	42995241	42995944	FALSE	TRUE	TRUE	intron (NM_001355224, intron 7 of 22)	MER44D|DNA|TcMar-Tigger	-3099	NM_001080850	728621	Hs.729640	NM_001080850	ENSG00000186409	CCDC30	PFD6L|PFDN6L	coiled-coil domain containing 30	protein-coding	4.91	50.45	26.84	5.34333	5.04	8.02
Merged-chr1-43446152-5	chr1	43445784	43446414	FALSE	TRUE	TRUE	intron (NR_033967, intron 3 of 3)	intron (NR_033967, intron 3 of 3)	-21252	NM_006516	6513	Hs.473721	NM_006516	ENSG00000117394	SLC2A1	CSE|DYT17|DYT18|DYT9|EIG12|GLUT|GLUT-1|GLUT1|GLUT1DS|HTLVR|PED|SDCHCN	solute carrier family 2 member 1	protein-coding	6.16	36.9567	23.89	6.85	4.845	6.01
Merged-chr1-43474067-3	chr1	43473933	43474216	FALSE	TRUE	FALSE	Intergenic	Intergenic	-49227	NM_006516	6513	Hs.473721	NM_006516	ENSG00000117394	SLC2A1	CSE|DYT17|DYT18|DYT9|EIG12|GLUT|GLUT-1|GLUT1|GLUT1DS|HTLVR|PED|SDCHCN	solute carrier family 2 member 1	protein-coding	1.615	10.6567	4.555	2.33333	2.52	2.51
Merged-chr1-43505855-3	chr1	43505659	43506202	FALSE	FALSE	TRUE	Intergenic	AluJb|SINE|Alu	-81083	NM_006516	6513	Hs.473721	NM_006516	ENSG00000117394	SLC2A1	CSE|DYT17|DYT18|DYT9|EIG12|GLUT|GLUT-1|GLUT1|GLUT1DS|HTLVR|PED|SDCHCN	solute carrier family 2 member 1	protein-coding	3.11	11.3833	13.1	3.15333	3.49	2
Merged-chr1-43855389-5	chr1	43855142	43855619	FALSE	TRUE	TRUE	promoter-TSS (NM_015284)	promoter-TSS (NM_015284)	103	NM_052877	112950	Hs.301756	NM_052877	ENSG00000159479	MED8	ARC32	mediator complex subunit 8	protein-coding	4.325	50.1967	33.16	5.89667	4.46	3.01
Merged-chr1-43870238-2	chr1	43870106	43870351	FALSE	FALSE	TRUE	intron (NM_015284, intron 4 of 70)	intron (NM_015284, intron 4 of 70)	14672	NM_015284	23334	Hs.643560	NM_015284	ENSG00000198198	SZT2	C1orf84|EIEE18|KIAA0467|SZT2A|SZT2B	SZT2, KICSTOR complex subunit	protein-coding	1.315	3.73667	6.935	0.276667	0.585	1.5
Merged-chr1-44107718-4	chr1	44107511	44107930	FALSE	FALSE	TRUE	Intergenic	AluSx1|SINE|Alu	-8077	NM_014663	9682	Hs.155983	NM_014663	ENSG00000066135	KDM4A	JHDM3A|JMJD2|JMJD2A|TDRD14A	lysine demethylase 4A	protein-coding	2.015	21.4967	11.065	2.74667	1.355	2.51
Merged-chr1-44116420-5	chr1	44116184	44116710	FALSE	TRUE	TRUE	intron (NM_014663, intron 1 of 21)	MIRb|SINE|MIR	650	NM_014663	9682	Hs.155983	NM_014663	ENSG00000066135	KDM4A	JHDM3A|JMJD2|JMJD2A|TDRD14A	lysine demethylase 4A	protein-coding	8.73	32.1767	23.89	3.58333	3.685	3.51
Merged-chr1-44395362-5	chr1	44394996	44395666	FALSE	TRUE	TRUE	intron (NM_001350620, intron 12 of 12)	intron (NM_001350620, intron 12 of 12)	-3661	NM_001136215	9048	Hs.632404	NM_003976	ENSG00000117407	ARTN	ART|ENOVIN|EVN|NBN	artemin	protein-coding	4.91	48.6667	31.005	3.69667	2.905	5.51
Merged-chr1-44495842-5	chr1	44495541	44496067	FALSE	TRUE	TRUE	intron (NM_001024845, intron 1 of 13)	CpG	991	NM_001328629	6536	Hs.442590	NM_006934	ENSG00000196517	SLC6A9	GCENSG|GLYT1	solute carrier family 6 member 9	protein-coding	9.405	48.07	46.285	4.38667	5.235	4.01
Merged-chr1-44497044-5	chr1	44496817	44497279	FALSE	TRUE	TRUE	promoter-TSS (NM_001328629)	promoter-TSS (NM_001328629)	116	NM_001328626	6536	Hs.442590	NM_006934	ENSG00000196517	SLC6A9	GCENSG|GLYT1	solute carrier family 6 member 9	protein-coding	4.245	25.0667	26.61	3.28667	2.52	4.51
Merged-chr1-44620545-5	chr1	44620260	44620874	FALSE	TRUE	TRUE	Intergenic	Intergenic	-13264	NM_001358438	105378952		NM_001358438	ENSG00000283039	KLF18	-	Kruppel like factor 18	protein-coding	2.2	30.7267	15.435	4.68	1.55	3.01
Merged-chr1-45159730-4	chr1	45159571	45159935	FALSE	TRUE	FALSE	intron (NM_001145636, intron 2 of 11)	L2b|LINE|L2	19359	NM_001145636	339541	Hs.173679	NM_001004307	ENSG00000198520	ARMH1	C1orf228|NCRNA00082|p40	armadillo-like helical domain containing 1	protein-coding	0.96	12.61	7.73	2.05667	1.94	2
Merged-chr1-45166465-4	chr1	45166184	45166785	FALSE	TRUE	FALSE	intron (NM_001145636, intron 4 of 11)	intron (NM_001145636, intron 4 of 11)	26090	NM_001145636	339541	Hs.173679	NM_001004307	ENSG00000198520	ARMH1	C1orf228|NCRNA00082|p40	armadillo-like helical domain containing 1	protein-coding	6.73	24.7933	15.96	4.36	3.49	1
Merged-chr1-45167040-5	chr1	45166863	45167275	TRUE	TRUE	FALSE	intron (NM_001145636, intron 5 of 11)	intron (NM_001145636, intron 5 of 11)	26675	NM_001145636	339541	Hs.173679	NM_001004307	ENSG00000198520	ARMH1	C1orf228|NCRNA00082|p40	armadillo-like helical domain containing 1	protein-coding	7.835	29.7233	14.075	4.38333	3.875	3.51
Merged-chr1-45273205-5	chr1	45273044	45273430	FALSE	TRUE	TRUE	promoter-TSS (NM_001136537)	promoter-TSS (NM_001136537)	-280	NM_001013632	343521	Hs.585137	NM_001013632	ENSG00000188396	TCTEX1D4	-	Tctex1 domain containing 4	protein-coding	4.475	24.9167	12.535	3.14667	3.88	4.51
Merged-chr1-45726379-5	chr1	45726125	45726700	FALSE	TRUE	TRUE	Intergenic	L1MD3|LINE|L1	-43170	NR_024270	400752	Hs.334348	NR_024270	ENSG00000281912	LINC01144	-	long intergenic non-protein coding RNA 1144	ncRNA	3.195	23.6533	13.395	4.65667	4.46	3.01
Merged-chr1-45804707-5	chr1	45804408	45804946	FALSE	TRUE	TRUE	promoter-TSS (NM_025077)	promoter-TSS (NM_025077)	-665	NM_025077	114034	Hs.525091	NM_025077	ENSG00000132773	TOE1	PCH7|hCaf1z	target of EGR1, exonuclease	protein-coding	4	20.0033	16.275	5.21333	4.265	3.01
Merged-chr1-46139847-5	chr1	46139612	46140082	FALSE	TRUE	TRUE	intron (NM_021639, intron 2 of 12)	intron (NM_021639, intron 2 of 12)	12455	NM_021639	60313	Hs.238432	NM_021639	ENSG00000159592	GPBP1L1	SP192	GC-rich promoter binding protein 1 like 1	protein-coding	1.915	24.56	13.755	3.69	1.355	5.01
Merged-chr1-46218316-5	chr1	46217934	46218728	FALSE	TRUE	TRUE	Intergenic	AluJb|SINE|Alu	-1846	NM_005897	3652	Hs.744252	NM_005897	ENSG00000197429	IPP	KLHL27	intracisternal A particle-promoted polypeptide	protein-coding	6.58	73.06	34.565	7.52667	5.815	8.02
Merged-chr1-46353362-5	chr1	46353168	46353604	FALSE	TRUE	TRUE	intron (NM_001319245, intron 4 of 28)	intron (NM_001319245, intron 4 of 28)	23366	NM_001324321	23139	Hs.319481	NM_015112	ENSG00000086015	MAST2	MAST205|MTSSK	microtubule associated serine/threonine kinase 2	protein-coding	2.78	19.6067	15.095	2.08	2.71	3.01
Merged-chr1-46568813-5	chr1	46568541	46569093	FALSE	TRUE	TRUE	intron (NM_001303427, intron 1 of 9)	L1MB2|LINE|L1	27528	NM_001328651	8503	Hs.655387	NM_003629	ENSG00000117461	PIK3R3	p55|p55-GAMMA|p55PIK	phosphoinositide-3-kinase regulatory subunit 3	protein-coding	3.735	32.7167	18.65	4.52667	3.49	4.01
Merged-chr1-46600669-4	chr1	46600543	46600817	FALSE	FALSE	TRUE	intron (NR_125987, intron 2 of 2)	AmnSINE1|SINE|Deu	1637	NR_125987	101929626	Hs.534951	NR_125987	ENSG00000227857	LOC101929626	-	uncharacterized LOC101929626	ncRNA	1.21	9.92667	7.325	1.51333	0.97	2
Merged-chr1-46640209-5	chr1	46639638	46640621	FALSE	TRUE	TRUE	promoter-TSS (NM_005727)	promoter-TSS (NM_005727)	444	NM_001328648	8503	Hs.655387	NM_003629	ENSG00000117461	PIK3R3	p55|p55-GAMMA|p55PIK	phosphoinositide-3-kinase regulatory subunit 3	protein-coding	10.48	55.1533	45.31	7.29667	6.4	4.51
Merged-chr1-46751890-5	chr1	46751644	46752081	FALSE	TRUE	TRUE	exon (NM_006369, exon 4 of 10)	exon (NM_006369, exon 4 of 10)	17176	NM_006369	10489	Hs.144941	NM_006369	ENSG00000132128	LRRC41	MUF1|PP7759	leucine rich repeat containing 41	protein-coding	2.305	19.5	15.82	1.51333	1.745	1.5
Merged-chr1-47141373-5	chr1	47141202	47141607	FALSE	TRUE	TRUE	3' UTR (NM_014774, exon 11 of 11)	3' UTR (NM_014774, exon 11 of 11)	1696	NR_038827	100130197	Hs.568643	NR_038827	ENSG00000228237	EFCAB14-AS1	KIAA0494-AS1	EFCAB14 antisense RNA 1	ncRNA	2.525	15.34	9.43	1.79	1.745	1.5
Merged-chr1-48332684-5	chr1	48332308	48332923	FALSE	TRUE	TRUE	intron (NM_001194986, intron 2 of 6)	intron (NM_001194986, intron 2 of 6)	129947	NM_001194986	388630	Hs.61504	NM_001194986	ENSG00000269113	TRABD2B	TIKI2	TraB domain containing 2B	protein-coding	4.51	35.2533	22.255	5.06333	6.4	3.01
Merged-chr1-48407758-5	chr1	48407258	48408337	FALSE	TRUE	TRUE	intron (NM_001194986, intron 2 of 6)	intron (NM_001194986, intron 2 of 6)	54765	NM_001194986	388630	Hs.61504	NM_001194986	ENSG00000269113	TRABD2B	TIKI2	TraB domain containing 2B	protein-coding	5.95	50.2333	37.58	7.14	3.875	6.01
Merged-chr1-50751899-5	chr1	50751690	50752196	FALSE	TRUE	TRUE	Intergenic	Intergenic	137176	NM_032110	63950	Hs.334481	NM_032110	ENSG00000142700	DMRTA2	-	DMRT like family A2	protein-coding	1.98	23.0033	11.675	3.14333	5.04	3.01
Merged-chr1-50993563-3	chr1	50993107	50993761	FALSE	TRUE	FALSE	intron (NM_007051, intron 15 of 18)	Charlie25|DNA|hAT-Charlie	-104315	NM_032110	63950	Hs.334481	NM_032110	ENSG00000142700	DMRTA2	-	DMRT like family A2	protein-coding	3.195	16.2633	5.145	3.84	2.91	3.51
Merged-chr1-51137137-5	chr1	51136847	51137345	FALSE	TRUE	TRUE	intron (NM_007051, intron 7 of 18)	intron (NM_007051, intron 7 of 18)	-247977	NM_032110	63950	Hs.334481	NM_032110	ENSG00000142700	DMRTA2	-	DMRT like family A2	protein-coding	2.825	17.8533	14.395	2.34333	1.355	3.51
Merged-chr1-51636206-5	chr1	51636012	51636379	FALSE	TRUE	TRUE	Intergenic	Tigger3a|DNA|TcMar-Tigger	64573	NR_147076	105378716		NR_147076	ENSG00000203356	LINC01562	-	long intergenic non-protein coding RNA 1562	ncRNA	5.13	32.0767	12.085	4.12667	2.52	3.51
Merged-chr1-51887944-5	chr1	51887667	51888334	FALSE	TRUE	TRUE	promoter-TSS (NM_001159969)	promoter-TSS (NM_001159969)	-207	NM_001159969	2060	Hs.83722	NM_001981	ENSG00000085832	EPS15	AF-1P|AF1P|MLLT5	epidermal growth factor receptor pathway substrate 15	protein-coding	6.995	55.13	36.605	3.83333	3.875	5.01
Merged-chr1-51929467-4	chr1	51929261	51929782	FALSE	FALSE	TRUE	intron (NM_001981, intron 6 of 24)	intron (NM_001981, intron 6 of 24)	-41728	NM_001159969	2060	Hs.83722	NM_001981	ENSG00000085832	EPS15	AF-1P|AF1P|MLLT5	epidermal growth factor receptor pathway substrate 15	protein-coding	4.035	14.4667	15.37	3.28333	2.33	2.51
Merged-chr1-52035273-4	chr1	52035063	52035546	FALSE	FALSE	TRUE	Intergenic	Intergenic	-47242	NM_148909	114883	Hs.21938	NM_024586	ENSG00000117859	OSBPL9	ORP-9|ORP9	oxysterol binding protein like 9	protein-coding	2.165	15.4	13.62	4.24	1.745	5.01
Merged-chr1-52088077-4	chr1	52087796	52088384	FALSE	TRUE	FALSE	intron (NM_148906, intron 1 of 22)	MLT1F1|LTR|ERVL-MaLR	5544	NM_001350209	114883	Hs.21938	NM_024586	ENSG00000117859	OSBPL9	ORP-9|ORP9	oxysterol binding protein like 9	protein-coding	4.365	26.3133	14.89	4.65667	4.655	7.52
Merged-chr1-52156388-5	chr1	52155901	52156824	FALSE	TRUE	TRUE	intron (NM_148906, intron 2 of 22)	L2a|LINE|L2	-39124	NM_001350210	114883	Hs.21938	NM_024586	ENSG00000117859	OSBPL9	ORP-9|ORP9	oxysterol binding protein like 9	protein-coding	12.21	65.76	31.825	9.87667	12.6	10.52
Merged-chr1-52373170-3	chr1	52372990	52373369	FALSE	FALSE	TRUE	TTS (NM_002867)	TTS (NM_002867)	-28570	NM_001101662	4898	Hs.584782	NM_002525	ENSG00000078618	NRDC	NRD1|hNRD1|hNRD2	nardilysin convertase	protein-coding	2.09	8.71333	14.755	3.14	2.52	2.51
Merged-chr1-52521400-6	chr1	52520879	52521826	TRUE	TRUE	TRUE	promoter-TSS (NM_001243767)	promoter-TSS (NM_001243767)	491	NR_046406	51060	Hs.476033	NM_015913	ENSG00000117862	TXNDC12	AG1|AGR1|ERP16|ERP18|ERP19|PDIA16|TLP19|hAG-1|hTLP19	thioredoxin domain containing 12	protein-coding	20.315	133.867	94.68	10.6767	9.885	9.52
Merged-chr1-52997323-3	chr1	52997166	52997493	FALSE	FALSE	TRUE	intron (NM_001009881, intron 1 of 29)	intron (NM_001009881, intron 1 of 29)	21433	NM_001009881	23318	Hs.655407	NM_015269	ENSG00000134744	TUT4	PAPD3|TENT3A|ZCCHC11	terminal uridylyl transferase 4	protein-coding	2.56	6.18667	9.09	1.65	1.94	2.51
Merged-chr1-53280332-5	chr1	53280076	53280511	FALSE	TRUE	TRUE	intron (NM_024646, intron 12 of 13)	FRAM|SINE|Alu	-27890	NM_001307931	440590	Hs.658458	NM_001004339	ENSG00000203995	ZYG11A	ZYG11	zyg-11 family member A, cell cycle regulator	protein-coding	4.39	28.7133	17.885	3.82667	2.715	2.51
Merged-chr1-53336720-2	chr1	53336596	53336866	FALSE	FALSE	TRUE	intron (NM_001004339, intron 8 of 13)	L1M4|LINE|L1	28548	NM_001004339	440590	Hs.658458	NM_001004339	ENSG00000203995	ZYG11A	ZYG11	zyg-11 family member A, cell cycle regulator	protein-coding	1.65	4.49667	6.89	0.963333	1.16	0.5
Merged-chr1-53605909-4	chr1	53605415	53606499	FALSE	TRUE	FALSE	intron (NM_001287597, intron 1 of 9)	intron (NM_001287597, intron 1 of 9)	2347	NM_001287596	6512	Hs.104637	NM_006671	ENSG00000162383	SLC1A7	AAAT|EAAT5	solute carrier family 1 member 7	protein-coding	7.195	38.3633	17.795	8.76333	5.04	6.01
Merged-chr1-53649253-3	chr1	53649131	53649382	FALSE	TRUE	FALSE	Intergenic	MER58A|DNA|hAT-Charlie	-12845	NM_000098	1376	Hs.713535	NM_000098	ENSG00000157184	CPT2	CPT1|CPTASE|IIAE4	carnitine palmitoyltransferase 2	protein-coding	3.405	13.5133	4.74	2.19667	3.1	3.51
Merged-chr1-54247608-3	chr1	54247419	54247767	FALSE	FALSE	TRUE	intron (NM_001168551, intron 16 of 17)	intron (NM_001168551, intron 16 of 17)	-47716	NM_147193	148979	Hs.306691	NM_147193	ENSG00000174332	GLIS1	-	GLIS family zinc finger 1	protein-coding	0.96	5.91333	10.675	1.51333	1.355	1
Merged-chr1-54350821-4	chr1	54350478	54351124	FALSE	FALSE	TRUE	intron (NR_135075, intron 1 of 8)	MIRb|SINE|MIR	4686	NR_036640	54432	Hs.11923	NM_018982	ENSG00000058799	YIPF1	DJ167A19.1|FinGER1	Yip1 domain family member 1	protein-coding	3.7	21.4	13.735	1.89333	2.715	2
Merged-chr1-54453810-3	chr1	54453645	54453995	FALSE	TRUE	FALSE	Intergenic	Tigger7|DNA|TcMar-Tigger	30039	NM_001276395	388633	Hs.439583	NM_001010978	ENSG00000203985	LDLRAD1	-	low density lipoprotein receptor class A domain containing 1	protein-coding	2.055	14.81	5.78	1.65333	1.165	2.51
Merged-chr1-54482421-4	chr1	54482179	54482692	FALSE	TRUE	FALSE	intron (NM_001010978, intron 2 of 5)	MIRb|SINE|MIR	1424	NM_001276395	388633	Hs.439583	NM_001010978	ENSG00000203985	LDLRAD1	-	low density lipoprotein receptor class A domain containing 1	protein-coding	4.51	26.2933	13.01	5.2	3.875	7.02
Merged-chr1-54546401-3	chr1	54546259	54546547	FALSE	TRUE	FALSE	intron (NM_153035, intron 3 of 4)	intron (NM_153035, intron 3 of 4)	26651	NR_039942	100616315		NR_039942	ENSG00000283749	MIR4781	mir-4781	microRNA 4781	ncRNA	2.13	12.2367	3.195	2.19	2.13	1
Merged-chr1-55264622-4	chr1	55264466	55264801	FALSE	FALSE	TRUE	intron (NM_001114108, intron 1 of 6)	MIRc|SINE|MIR	2308	NM_001114108	55001	Hs.16230	NM_017904	ENSG00000006555	TTC22	-	tetratricopeptide repeat domain 22	protein-coding	1.21	10.22	7.325	1.51667	1.55	0.5
Merged-chr1-55322270-4	chr1	55322079	55322461	FALSE	TRUE	FALSE	intron (NM_014762, intron 6 of 8)	AluSx1|SINE|Alu	30651	NM_014762	1718	Hs.498727	NM_014762	ENSG00000116133	DHCR24	DCE|Nbla03646|SELADIN1|seladin-1	24-dehydrocholesterol reductase	protein-coding	2.34	23.67	10.065	2.21	1.55	2.51
Merged-chr1-55327245-5	chr1	55326939	55327521	FALSE	TRUE	TRUE	intron (NM_014762, intron 6 of 8)	L2a|LINE|L2	25691	NM_014762	1718	Hs.498727	NM_014762	ENSG00000116133	DHCR24	DCE|Nbla03646|SELADIN1|seladin-1	24-dehydrocholesterol reductase	protein-coding	4.475	29.86	15.64	5.05	4.455	2.51
Merged-chr1-55335162-5	chr1	55334895	55335505	FALSE	TRUE	TRUE	intron (NM_014762, intron 5 of 8)	L1ME3B|LINE|L1	17721	NM_014762	1718	Hs.498727	NM_014762	ENSG00000116133	DHCR24	DCE|Nbla03646|SELADIN1|seladin-1	24-dehydrocholesterol reductase	protein-coding	6.375	50.0967	23.05	6.15667	6.205	5.01
Merged-chr1-55349688-5	chr1	55349516	55350077	FALSE	TRUE	TRUE	intron (NM_014762, intron 1 of 8)	MIRb|SINE|MIR	3125	NM_014762	1718	Hs.498727	NM_014762	ENSG00000116133	DHCR24	DCE|Nbla03646|SELADIN1|seladin-1	24-dehydrocholesterol reductase	protein-coding	2.79	23.4333	16.205	5.46667	4.07	2.51
Merged-chr1-55810219-4	chr1	55809818	55810645	FALSE	FALSE	TRUE	Intergenic	THE1A-int|LTR|ERVL-MaLR	118917	NR_039618	100616272		NR_039618	ENSG00000265822	MIR4422	mir-4422	microRNA 4422	ncRNA	6.665	31.2367	25.75	5.44	3.295	6.01
Merged-chr1-55887103-4	chr1	55886555	55887487	FALSE	TRUE	FALSE	Intergenic	Intergenic	195707	NR_039618	100616272		NR_039618	ENSG00000265822	MIR4422	mir-4422	microRNA 4422	ncRNA	6.57	41.9333	16.3	7.84667	4.845	6.52
Merged-chr1-55909468-5	chr1	55909197	55909692	FALSE	TRUE	TRUE	Intergenic	Intergenic	218130	NR_039618	100616272		NR_039618	ENSG00000265822	MIR4422	mir-4422	microRNA 4422	ncRNA	2.275	38.4533	18.34	2.72	1.94	3.01
Merged-chr1-55913357-5	chr1	55913142	55913600	FALSE	TRUE	TRUE	Intergenic	MIRc|SINE|MIR	222057	NR_039618	100616272		NR_039618	ENSG00000265822	MIR4422	mir-4422	microRNA 4422	ncRNA	2.2	27.0733	12.51	3.41667	2.905	4.01
Merged-chr1-56279448-5	chr1	56279223	56279644	FALSE	TRUE	TRUE	Intergenic	ERV3-16A3_I-int|LTR|ERVL	131203	NR_147162	105378739	Hs.98895	NR_147162	ENSG00000230250	LINC01753	-	long intergenic non-protein coding RNA 1753	ncRNA	3.26	25.5267	16.045	2.18333	1.55	2
Merged-chr1-56362082-3	chr1	56361956	56362193	FALSE	FALSE	TRUE	Intergenic	Intergenic	48562	NR_147162	105378739	Hs.98895	NR_147162	ENSG00000230250	LINC01753	-	long intergenic non-protein coding RNA 1753	ncRNA	1.43	3.89	9.065	1.24	0.39	0.5
Merged-chr1-56655889-3	chr1	56655665	56656162	FALSE	TRUE	FALSE	Intergenic	Intergenic	-224722	NR_147163	105378744	Hs.183974	NR_147163	ENSG00000223956	LINC01767	-	long intergenic non-protein coding RNA 1767	ncRNA	5.05	33.6233	14.01	6.99333	4.655	4.01
Merged-chr1-56657170-4	chr1	56656933	56657347	FALSE	TRUE	FALSE	Intergenic	MIRc|SINE|MIR	-223495	NR_147163	105378744	Hs.183974	NR_147163	ENSG00000223956	LINC01767	-	long intergenic non-protein coding RNA 1767	ncRNA	2.055	20.0033	10.925	2.89667	2.71	2.51
Merged-chr1-56727972-5	chr1	56727625	56728297	FALSE	TRUE	TRUE	Intergenic	MLT1I|LTR|ERVL-MaLR	-152674	NR_147163	105378744	Hs.183974	NR_147163	ENSG00000223956	LINC01767	-	long intergenic non-protein coding RNA 1767	ncRNA	4.105	28.95	13.485	2.86333	2.52	3.01
Merged-chr1-56922470-7	chr1	56921928	56922820	FALSE	TRUE	TRUE	Intergenic	Intergenic	41739	NR_147163	105378744	Hs.183974	NR_147163	ENSG00000223956	LINC01767	-	long intergenic non-protein coding RNA 1767	ncRNA	4.88	40.7767	21.33	7.56333	3.875	10.52
Merged-chr1-57035575-5	chr1	57035348	57035845	FALSE	TRUE	TRUE	intron (NM_003713, intron 1 of 5)	L2c|LINE|L2	9661	NM_003713	8613	Hs.405156	NM_003713	ENSG00000162407	PLPP3	Dri42|LPP3|PAP2B|PPAP2B|VCIP	phospholipid phosphatase 3	protein-coding	5.605	25.2167	15.98	4.12	4.845	2.51
Merged-chr1-57246189-6	chr1	57245774	57246425	TRUE	TRUE	TRUE	intron (NM_001004303, intron 4 of 19)	intron (NM_001004303, intron 4 of 19)	39270	NM_001004303	199920	Hs.437655	NM_001004303	ENSG00000187889	FYB2	ARAP|C1orf168	FYN binding protein 2	protein-coding	11.46	50.5467	35.225	6.28	5.235	6.01
Merged-chr1-57261735-4	chr1	57261521	57262020	FALSE	FALSE	TRUE	intron (NM_001004303, intron 1 of 19)	MIR3|SINE|MIR	23599	NM_001004303	199920	Hs.437655	NM_001004303	ENSG00000187889	FYB2	ARAP|C1orf168	FYN binding protein 2	protein-coding	2.305	10.9967	16.725	1.35333	2.905	2
Merged-chr1-57301663-4	chr1	57301471	57302010	FALSE	TRUE	FALSE	Intergenic	MLT1M|LTR|ERVL-MaLR	-16371	NM_001004303	199920	Hs.437655	NM_001004303	ENSG00000187889	FYB2	ARAP|C1orf168	FYN binding protein 2	protein-coding	3.225	17.0067	9.18	3.16333	4.46	2.51
Merged-chr1-57321404-4	chr1	57321187	57321609	FALSE	FALSE	TRUE	intron (NM_000562, intron 1 of 10)	intron (NM_000562, intron 1 of 10)	955	NM_000562	731	Hs.93210	NM_000562	ENSG00000157131	C8A	-	complement C8 alpha chain	protein-coding	5.065	13.2767	21.06	3.01	3.49	0.5
Merged-chr1-57377417-5	chr1	57377035	57377784	FALSE	TRUE	TRUE	intron (NM_000562, intron 9 of 10)	intron (NM_000562, intron 9 of 10)	54404	NM_001278543	732	Hs.391835	NM_000066	ENSG00000021852	C8B	C82	complement C8 beta chain	protein-coding	7.635	69.1633	33.41	5.35	6.01	5.01
Merged-chr1-57429566-4	chr1	57429376	57429823	FALSE	FALSE	TRUE	5' UTR (NM_001278543, exon 2 of 13)	5' UTR (NM_001278543, exon 2 of 13)	2214	NM_001278543	732	Hs.391835	NM_000066	ENSG00000021852	C8B	C82	complement C8 beta chain	protein-coding	4.91	19.1433	12.92	1.48	0.97	2.51
Merged-chr1-57439792-4	chr1	57439633	57439972	FALSE	TRUE	FALSE	Intergenic	Intergenic	-7989	NM_001278544	732	Hs.391835	NM_000066	ENSG00000021852	C8B	C82	complement C8 beta chain	protein-coding	1.87	14.8933	9.18	1.63333	2.13	1
Merged-chr1-57469299-3	chr1	57469161	57469453	FALSE	TRUE	FALSE	intron (NM_001353983, intron 14 of 14)	L1MB4|LINE|L1	-37494	NM_001278544	732	Hs.391835	NM_000066	ENSG00000021852	C8B	C82	complement C8 beta chain	protein-coding	2.305	9.61	2.765	1.65	1.165	0.5
Merged-chr1-57746058-4	chr1	57745890	57746230	FALSE	TRUE	FALSE	intron (NM_001353983, intron 2 of 14)	intron (NM_001353983, intron 2 of 14)	143703	NM_001353986	1600	Hs.477370	NM_021080	ENSG00000173406	DAB1	SCA37	DAB1, reelin adaptor protein	protein-coding	4.105	27.79	9.635	4.27333	4.265	3.51
Merged-chr1-57776950-5	chr1	57776399	57777506	FALSE	TRUE	TRUE	intron (NM_001353980, intron 4 of 5)	intron (NM_001353980, intron 4 of 5)	112811	NM_001353986	1600	Hs.477370	NM_021080	ENSG00000173406	DAB1	SCA37	DAB1, reelin adaptor protein	protein-coding	8.13	62.35	27.79	5.60667	4.65	5.01
Merged-chr1-58140722-4	chr1	58140494	58140949	FALSE	FALSE	TRUE	intron (NM_001353980, intron 3 of 5)	intron (NM_001353980, intron 3 of 5)	-185494	NR_104363	101926890	Hs.662207	NR_104362	ENSG00000226759	DAB1-AS1	-	DAB1 antisense RNA 1	ncRNA	1.76	9.92	12.055	0.96	1.55	1
Merged-chr1-58759203-4	chr1	58759026	58759357	FALSE	FALSE	TRUE	Intergenic	Intergenic	-42972	NM_021080	1600	Hs.477370	NM_021080	ENSG00000173406	DAB1	SCA37	DAB1, reelin adaptor protein	protein-coding	1.43	7.84	9.675	0.95	0.775	1
Merged-chr1-59338598-3	chr1	59338418	59338861	FALSE	TRUE	FALSE	intron (NR_108106, intron 1 of 1)	AluSx|SINE|Alu	87816	NR_034015	100131060	Hs.680604	NR_034014	ENSG00000234807	LINC01135	-	long intergenic non-protein coding RNA 1135	ncRNA	3.815	14.6467	10.015	3.01333	3.1	2
Merged-chr1-59340854-5	chr1	59340575	59341326	FALSE	TRUE	TRUE	intron (NR_108106, intron 1 of 1)	intron (NR_108106, intron 1 of 1)	90127	NR_034015	100131060	Hs.680604	NR_034014	ENSG00000234807	LINC01135	-	long intergenic non-protein coding RNA 1135	ncRNA	4.55	23.14	21.195	4.38	6.98	4.51
Merged-chr1-59349100-4	chr1	59348864	59349336	FALSE	TRUE	FALSE	intron (NR_108106, intron 1 of 1)	intron (NR_108106, intron 1 of 1)	98277	NR_034015	100131060	Hs.680604	NR_034014	ENSG00000234807	LINC01135	-	long intergenic non-protein coding RNA 1135	ncRNA	6.075	40.5333	17.405	6.06	2.715	7.52
Merged-chr1-59536542-5	chr1	59536168	59537209	FALSE	TRUE	TRUE	intron (NR_110626, intron 2 of 2)	L2b|LINE|L2	50540	NR_110626	101926925		NR_110626		LINC01358	-	long intergenic non-protein coding RNA 1358	ncRNA	10.075	55.8333	29.87	7.93333	7.755	6.52
Merged-chr1-59540406-5	chr1	59540092	59540657	FALSE	TRUE	TRUE	intron (NR_110626, intron 2 of 2)	L1MC2|LINE|L1	54226	NR_110626	101926925		NR_110626		LINC01358	-	long intergenic non-protein coding RNA 1358	ncRNA	3.965	24.4967	15.595	4.36333	2.33	6.52
Merged-chr1-59680721-5	chr1	59680557	59680883	FALSE	TRUE	TRUE	Intergenic	Intergenic	-68241	NR_027120	729467	Hs.662291	NR_027120	ENSG00000224609	HSD52	-	uncharacterized LOC729467	ncRNA	4.475	18.66	10.79	3.01333	2.905	2.51
Merged-chr1-59966902-3	chr1	59966649	59967054	FALSE	TRUE	FALSE	intron (NM_001350799, intron 5 of 13)	intron (NM_001350799, intron 5 of 13)	-14450	NM_001278224	55277	Hs.444301	NM_018291	ENSG00000172456	FGGY	-	FGGY carbohydrate kinase domain containing	protein-coding	4.185	12.58	5.53	2.05667	1.745	3.01
Merged-chr1-61039553-3	chr1	61039367	61039698	FALSE	TRUE	FALSE	intron (NR_146508, intron 4 of 7)	intron (NR_146508, intron 4 of 7)	48825	NR_146508	105378763	Hs.551175	NR_146508	ENSG00000226476	LINC01748	-	long intergenic non-protein coding RNA 1748	ncRNA	1.87	11.6333	4.555	1.51	0.39	0
Merged-chr1-61314416-5	chr1	61314166	61314630	FALSE	TRUE	TRUE	Intergenic	Intergenic	-23142	NR_110628	101926964	Hs.650459	NR_110628	ENSG00000231252	LOC101926964	-	uncharacterized LOC101926964	ncRNA	2.015	46.7067	19.7	2.91	2.905	4.01
Merged-chr1-61524392-4	chr1	61524200	61524626	FALSE	FALSE	TRUE	Intergenic	Intergenic	-18533	NM_001145511	4774	Hs.740757	NM_005595	ENSG00000162599	NFIA	BRMUTD|CTF|NF-I/A|NF1-A|NFI-A|NFI-L	nuclear factor I A	protein-coding	3.38	18.7933	12.355	3.15	2.71	2
Merged-chr1-61586763-5	chr1	61586331	61587008	FALSE	TRUE	TRUE	intron (NM_001134673, intron 2 of 10)	intron (NM_001134673, intron 2 of 10)	38689	NM_001134673	4774	Hs.740757	NM_005595	ENSG00000162599	NFIA	BRMUTD|CTF|NF-I/A|NF1-A|NFI-A|NFI-L	nuclear factor I A	protein-coding	10.78	53.7267	46.785	8.75667	7.175	9.02
Merged-chr1-61607458-5	chr1	61607094	61607712	FALSE	TRUE	TRUE	intron (NM_001134673, intron 2 of 10)	intron (NM_001134673, intron 2 of 10)	59423	NM_001134673	4774	Hs.740757	NM_005595	ENSG00000162599	NFIA	BRMUTD|CTF|NF-I/A|NF1-A|NFI-A|NFI-L	nuclear factor I A	protein-coding	3.62	59.54	28.285	7.24667	3.68	7.02
Merged-chr1-61629258-4	chr1	61629036	61629514	FALSE	FALSE	TRUE	intron (NM_001134673, intron 2 of 10)	intron (NM_001134673, intron 2 of 10)	81295	NM_001134673	4774	Hs.740757	NM_005595	ENSG00000162599	NFIA	BRMUTD|CTF|NF-I/A|NF1-A|NFI-A|NFI-L	nuclear factor I A	protein-coding	6.42	11.0533	15.455	0.943333	3.68	1.5
Merged-chr1-61689021-4	chr1	61688833	61689227	FALSE	FALSE	TRUE	intron (NM_001134673, intron 2 of 10)	intron (NM_001134673, intron 2 of 10)	30160	NR_104180	645030	Hs.632410	NR_104180	ENSG00000237853	NFIA-AS1	-	NFIA antisense RNA 1	ncRNA	4.475	24.24	11.375	4.22667	3.88	4.01
Merged-chr1-61767996-4	chr1	61767560	61768229	FALSE	TRUE	FALSE	intron (NM_001134673, intron 3 of 10)	intron (NM_001134673, intron 3 of 10)	-48704	NR_104180	645030	Hs.632410	NR_104180	ENSG00000237853	NFIA-AS1	-	NFIA antisense RNA 1	ncRNA	6.86	30.2633	17.725	5.61667	7.175	7.02
Merged-chr1-61918977-4	chr1	61918773	61919209	FALSE	TRUE	FALSE	intron (NM_001134673, intron 10 of 10)	intron (NM_001134673, intron 10 of 10)	-199801	NR_104180	645030	Hs.632410	NR_104180	ENSG00000237853	NFIA-AS1	-	NFIA antisense RNA 1	ncRNA	6.515	27.1567	13.01	3.81667	3.295	3.51
Merged-chr1-62027490-4	chr1	62027201	62027638	FALSE	TRUE	FALSE	Intergenic	MLT1I|LTR|ERVL-MaLR	-92495	NR_073400	414927	Hs.123471	NR_073400		MGC34796	-	sepiapterin reductase (7,8-dihydrobiopterin:NADP+ oxidoreductase) pseudogene	pseudo	1.105	13.0733	5.735	2.06333	1.94	0
Merged-chr1-62207039-4	chr1	62206746	62207266	FALSE	FALSE	TRUE	Intergenic	AluSx|SINE|Alu	-1132	NM_176877	10207	Hs.478125	NM_005799	ENSG00000132849	PATJ	Cipp|INADL|InaD-like|hINADL	PATJ, crumbs cell polarity complex component	protein-coding	2.49	18.92	17.43	4.09333	2.91	3.01
Merged-chr1-62889766-8	chr1	62889309	62890340	TRUE	TRUE	TRUE	Intergenic	MLT1H2|LTR|ERVL-MaLR	-12151	NM_001017415	7398	Hs.35086	NM_003368	ENSG00000162607	USP1	UBP	ubiquitin specific peptidase 1	protein-coding	14.65	74.8767	48.325	11.0033	8.92	6.52
Merged-chr1-63087713-6	chr1	63087474	63087982	TRUE	TRUE	TRUE	intron (NM_001272001, intron 12 of 47)	MLT1H|LTR|ERVL-MaLR	24570	NM_014495	27329	Hs.209153	NM_014495	ENSG00000132855	ANGPTL3	ANG-5|ANGPT5|ANL3|FHBL2	angiopoietin like 3	protein-coding	11.71	58.5133	28.22	6.14333	6.395	5.51
Merged-chr1-63155403-3	chr1	63155207	63155577	FALSE	TRUE	FALSE	Intergenic	Intergenic	-1353	NM_033407	85440	Hs.744927	NM_033407	ENSG00000116641	DOCK7	EIEE23|ZIR2	dedicator of cytokinesis 7	protein-coding	3.895	21.8933	8.005	3.58	1.94	5.01
Merged-chr1-63727673-4	chr1	63727391	63728080	FALSE	TRUE	FALSE	intron (NR_038252, intron 3 of 11)	intron (NR_038252, intron 3 of 11)	55193	NR_038252	199899	Hs.116210	NR_038252	ENSG00000224209	LINC00466	-	long intergenic non-protein coding RNA 466	ncRNA	5.5	36.57	16.34	3.83333	3.49	5.01
Merged-chr1-64106680-4	chr1	64106369	64107108	FALSE	TRUE	FALSE	intron (NM_002633, intron 7 of 10)	L3|LINE|CR1	17851	NM_001172818	5236	Hs.1869	NM_002633	ENSG00000079739	PGM1	CDG1T|GSD14	phosphoglucomutase 1	protein-coding	8.715	31.8433	14.505	5.33333	8.145	7.52
Merged-chr1-64157895-4	chr1	64157654	64158234	FALSE	TRUE	FALSE	Intergenic	Intergenic	69057	NM_001172818	5236	Hs.1869	NM_002633	ENSG00000079739	PGM1	CDG1T|GSD14	phosphoglucomutase 1	protein-coding	4.255	30.9767	15.39	5.47	4.65	3.51
Merged-chr1-65399995-5	chr1	65399766	65400382	FALSE	TRUE	TRUE	intron (NM_001321852, intron 1 of 24)	intron (NM_001321852, intron 1 of 24)	32178	NM_001321855	3716	Hs.207538	NM_002227	ENSG00000162434	JAK1	JAK1A|JAK1B|JTK3	Janus kinase 1	protein-coding	6.835	30.5	25.5	5.75	5.04	6.52
Merged-chr1-65415134-5	chr1	65414832	65415424	FALSE	TRUE	TRUE	intron (NM_001321852, intron 1 of 24)	intron (NM_001321852, intron 1 of 24)	17124	NM_001321855	3716	Hs.207538	NM_002227	ENSG00000162434	JAK1	JAK1A|JAK1B|JTK3	Janus kinase 1	protein-coding	4.92	46.6533	28.965	5.90667	3.49	3.51
Merged-chr1-65453449-6	chr1	65453085	65453818	TRUE	TRUE	TRUE	intron (NR_119383, intron 4 of 6)	intron (NR_119383, intron 4 of 6)	14708	NR_119383	101927084	Hs.734218	NR_119383	ENSG00000226891	LINC01359	-	long intergenic non-protein coding RNA 1359	ncRNA	14.225	59.53	28.445	7.93	6.785	7.52
Merged-chr1-65809164-5	chr1	65808849	65809595	FALSE	TRUE	TRUE	intron (NM_001256864, intron 1 of 18)	MER44C|DNA|TcMar-Tigger	34004	NM_001256864	9829	Hs.647643	NM_014787	ENSG00000116675	DNAJC6	DJC6|PARK19	DnaJ heat shock protein family (Hsp40) member C6	protein-coding	3.595	37.0067	19.7	3.28667	2.33	4.51
Merged-chr1-65825559-3	chr1	65825233	65825858	FALSE	TRUE	FALSE	intron (NM_001256865, intron 2 of 19)	MER58B|DNA|hAT-Charlie	50327	NM_001256864	9829	Hs.647643	NM_014787	ENSG00000116675	DNAJC6	DJC6|PARK19	DnaJ heat shock protein family (Hsp40) member C6	protein-coding	2.975	19.0867	5.595	3.98	2.52	1
Merged-chr1-65979893-4	chr1	65979663	65980115	FALSE	TRUE	FALSE	intron (NM_001003679, intron 2 of 19)	intron (NM_001003679, intron 2 of 19)	-11483	NM_001198687	3953	Hs.23581	NM_002303	ENSG00000116678	LEPR	CD295|LEP-R|LEPRD|OB-R|OBR	leptin receptor	protein-coding	3.125	20.01	9.705	2.88667	2.135	0
Merged-chr1-66079784-4	chr1	66079649	66079932	FALSE	FALSE	TRUE	intron (NM_001003679, intron 14 of 19)	L1MC3|LINE|L1	88418	NM_001198689	3953	Hs.23581	NM_002303	ENSG00000116678	LEPR	CD295|LEP-R|LEPRD|OB-R|OBR	leptin receptor	protein-coding	2.455	7.1	8.995	0.546667	0.585	0.5
Merged-chr1-66985880-5	chr1	66985570	66986111	FALSE	TRUE	TRUE	Intergenic	MIR3|SINE|MIR	-13412	NM_001308203	84251	Hs.132121	NM_032291	ENSG00000118473	SGIP1	-	SH3 domain GRB2 like endophilin interacting protein 1	protein-coding	2.755	26.4333	12.715	3.31333	2.325	5.51
Merged-chr1-67628938-4	chr1	67628705	67629192	FALSE	TRUE	FALSE	Intergenic	AluSx1|SINE|Alu	-3221	NM_144701	149233	Hs.677426	NM_144701	ENSG00000162594	IL23R	-	interleukin 23 receptor	protein-coding	1.36	20.42	10.745	2.75333	0.97	1.5
Merged-chr1-68130026-3	chr1	68129849	68130295	FALSE	TRUE	FALSE	Intergenic	Intergenic	-20788	NM_001199741	1647	Hs.80409	NM_001924	ENSG00000116717	GADD45A	DDIT1|GADD45	growth arrest and DNA damage inducible alpha	protein-coding	3.26	15.6033	6.48	4.51667	4.265	5.51
Merged-chr1-68148426-5	chr1	68148195	68148667	FALSE	TRUE	TRUE	Intergenic	Intergenic	-2429	NM_001199741	1647	Hs.80409	NM_001924	ENSG00000116717	GADD45A	DDIT1|GADD45	growth arrest and DNA damage inducible alpha	protein-coding	5.72	21.84	16.23	4.94333	3.49	4.51
Merged-chr1-68152456-3	chr1	68152210	68152633	FALSE	TRUE	FALSE	intron (NM_001924, intron 3 of 3)	intron (NM_001924, intron 3 of 3)	1561	NM_001924	1647	Hs.80409	NM_001924	ENSG00000116717	GADD45A	DDIT1|GADD45	growth arrest and DNA damage inducible alpha	protein-coding	4.51	22.2967	11.855	4.25667	3.49	4.01
Merged-chr1-68153542-5	chr1	68153327	68153733	FALSE	TRUE	TRUE	3' UTR (NM_001199742, exon 3 of 3)	3' UTR (NM_001199742, exon 3 of 3)	2670	NM_001924	1647	Hs.80409	NM_001924	ENSG00000116717	GADD45A	DDIT1|GADD45	growth arrest and DNA damage inducible alpha	protein-coding	2.64	26.3867	15.795	2.46	3.88	2
Merged-chr1-68154009-4	chr1	68153840	68154202	FALSE	FALSE	TRUE	TTS (NM_001199742)	TTS (NM_001199742)	3161	NM_001924	1647	Hs.80409	NM_001924	ENSG00000116717	GADD45A	DDIT1|GADD45	growth arrest and DNA damage inducible alpha	protein-coding	2.235	9.78	10.45	1.78333	2.715	2
Merged-chr1-68961528-4	chr1	68961283	68961772	FALSE	FALSE	TRUE	promoter-TSS (NR_110671)	promoter-TSS (NR_110671)	-832	NR_110671	101927220	Hs.382856	NR_110671	ENSG00000234264	DEPDC1-AS1	-	DEPDC1 antisense RNA 1	ncRNA	3.985	19.0133	18.38	4.80333	3.1	2.51
Merged-chr1-70877893-5	chr1	70877481	70878301	FALSE	TRUE	TRUE	intron (NM_153742, intron 1 of 10)	MIR|SINE|MIR	990	NM_001902	1491	Hs.19904	NM_001902	ENSG00000116761	CTH	-	cystathionine gamma-lyase	protein-coding	9.085	61.83	43.45	7.90667	4.455	10.52
Merged-chr1-71151233-4	chr1	71151062	71151459	FALSE	TRUE	FALSE	Intergenic	L1PB4|LINE|L1	-20876	NR_125938	101927244	Hs.568660	NR_125938	ENSG00000229051	LINC01788	-	long intergenic non-protein coding RNA 1788	ncRNA	4.185	20.9667	8.09	1.90333	0.97	2
Merged-chr1-72707365-4	chr1	72707110	72707739	FALSE	TRUE	FALSE	intron (NM_173808, intron 1 of 6)	intron (NM_173808, intron 1 of 6)	40853	NM_173808	257194	Hs.146542	NM_173808	ENSG00000172260	NEGR1	DMML2433|IGLON4|KILON|Ntra	neuronal growth regulator 1	protein-coding	7.18	31.7933	13.69	4.11	4.07	2.51
Merged-chr1-72832340-6	chr1	72832155	72832545	TRUE	TRUE	TRUE	Intergenic	Intergenic	-84073	NM_173808	257194	Hs.146542	NM_173808	ENSG00000172260	NEGR1	DMML2433|IGLON4|KILON|Ntra	neuronal growth regulator 1	protein-coding	9.26	35.1233	9.5	3.15667	4.07	3.51
Merged-chr1-74646384-5	chr1	74646128	74646640	FALSE	TRUE	TRUE	intron (NM_001105659, intron 3 of 7)	MIR|SINE|MIR	17487	NM_001322315	127255	Hs.644625	NM_145258	ENSG00000162620	LRRIQ3	LRRC44	leucine rich repeats and IQ motif containing 3	protein-coding	3.295	30.8	13.94	2.47667	2.91	3.51
Merged-chr1-76320848-3	chr1	76320682	76321015	FALSE	TRUE	FALSE	intron (NM_002440, intron 8 of 19)	AluJr4|SINE|Alu	58292	NM_002440	4438	Hs.216639	NM_002440	ENSG00000057468	MSH4	-	mutS homolog 4	protein-coding	4.865	11.7833	6.39	1.93	3.875	1.5
Merged-chr1-76796741-4	chr1	76796565	76796938	FALSE	TRUE	FALSE	intron (NM_001160011, intron 2 of 3)	LTR67B|LTR|ERVL	256382	NM_001349111	256435	Hs.337040	NM_152996	ENSG00000184005	ST6GALNAC3	PRO7177|SIAT7C|ST6GALNACIII|STY	ST6 N-acetylgalactosaminide alpha-2,6-sialyltransferase 3	protein-coding	1.76	14.4267	7.89	2.06333	2.325	3.01
Merged-chr1-77505664-4	chr1	77505487	77505837	FALSE	TRUE	FALSE	intron (NM_001320274, intron 2 of 2)	intron (NM_001320274, intron 2 of 2)	-20166	NR_106978	102466995		NR_106978	ENSG00000276081	MIR7156	hsa-mir-7156	microRNA 7156	ncRNA	1.245	14.0833	8.975	2.05	1.16	2
Merged-chr1-77787858-5	chr1	77787655	77788055	FALSE	TRUE	TRUE	intron (NM_012093, intron 5 of 13)	intron (NM_012093, intron 5 of 13)	39568	NM_012093	26289	Hs.559718	NM_012093	ENSG00000154027	AK5	AK6	adenylate kinase 5	protein-coding	1.18	28.05	12.085	3.29	1.36	0.5
Merged-chr1-77999498-5	chr1	77999167	77999812	FALSE	TRUE	TRUE	intron (NM_012093, intron 12 of 13)	intron (NM_012093, intron 12 of 13)	148854	NM_015534	26009	Hs.480506	NM_015534	ENSG00000036549	ZZZ3	ATAC1	zinc finger ZZ-type containing 3	protein-coding	5.42	45.0767	25.955	6.43667	4.845	4.01
Merged-chr1-78060706-4	chr1	78060559	78060958	FALSE	TRUE	FALSE	intron (NM_001308237, intron 4 of 13)	intron (NM_001308237, intron 4 of 13)	87585	NM_015534	26009	Hs.480506	NM_015534	ENSG00000036549	ZZZ3	ATAC1	zinc finger ZZ-type containing 3	protein-coding	1.65	13.6233	7.275	2.05667	1.555	4.51
Merged-chr1-78623099-2	chr1	78622928	78623247	FALSE	FALSE	TRUE	Intergenic	Intergenic	-72196	NR_027310	149047	Hs.352665	NM_144700	ENSG00000237413	MGC27382	-	uncharacterized MGC27382	ncRNA	1.87	4.79667	10.2	1.90667	2.135	2.51
Merged-chr1-82169810-4	chr1	82169463	82170166	FALSE	TRUE	FALSE	intron (NM_001297704, intron 1 of 20)	intron (NM_001297704, intron 1 of 20)	4359	NM_001297704	23266	Hs.24212	NM_012302	ENSG00000117114	ADGRL2	CIRL2|CL2|LEC1|LPHH1|LPHN2	adhesion G protein-coupled receptor L2	protein-coding	3.195	28.4033	13.395	4.41667	3.1	3.51
Merged-chr1-84284685-3	chr1	84284410	84284893	FALSE	TRUE	FALSE	intron (NR_119374, intron 2 of 2)	MSTB1-int|LTR|ERVL-MaLR	41578	NR_119374	101927560	Hs.559661	NR_119374	ENSG00000233008	LOC101927560	-	uncharacterized LOC101927560	ncRNA	1.76	15.5867	5.17	1.09	2.52	2
Merged-chr1-84305538-5	chr1	84305203	84305896	FALSE	TRUE	TRUE	intron (NR_119374, intron 2 of 2)	intron (NR_119374, intron 2 of 2)	20680	NR_119374	101927560	Hs.559661	NR_119374	ENSG00000233008	LOC101927560	-	uncharacterized LOC101927560	ncRNA	1.36	33.2867	20.72	3.96333	1.94	2.51
Merged-chr1-84425705-3	chr1	84425541	84425855	FALSE	FALSE	TRUE	intron (NM_001350214, intron 1 of 21)	intron (NM_001350214, intron 1 of 21)	39172	NM_024686	79739	Hs.445826	NM_024686	ENSG00000137941	TTLL7	-	tubulin tyrosine ligase like 7	protein-coding	0.74	4.52667	10.63	1.65	1.355	1.5
Merged-chr1-84583699-3	chr1	84583507	84583873	FALSE	TRUE	FALSE	intron (NM_207578, intron 1 of 8)	L1MA4A|LINE|L1	-26241	NM_001300916	5567	Hs.487325	NM_002731	ENSG00000142875	PRKACB	PKA C-beta|PKACB	protein kinase cAMP-activated catalytic subunit beta	protein-coding	2.855	10.6467	6.415	1.25	0.58	0.5
Merged-chr1-84719847-5	chr1	84719654	84720094	FALSE	TRUE	TRUE	Intergenic	Intergenic	-44175	NM_001010971	148418	Hs.591445	NM_001010971	ENSG00000203943	SAMD13	HSD-41|HSD-42	sterile alpha motif domain containing 13	protein-coding	4.695	50.1567	15.525	4.39	2.52	3.51
Merged-chr1-84971193-5	chr1	84970941	84971492	TRUE	TRUE	FALSE	promoter-TSS (NM_001310156)	promoter-TSS (NM_001310156)	-768	NM_001310156	100505741	Hs.584956	NM_022354	ENSG00000122432	SPATA1	SP-2|SPAP1	spermatogenesis associated 1	protein-coding	9.995	25.2433	12.26	4.78333	3.875	4.01
Merged-chr1-85600991-4	chr1	85600810	85601185	FALSE	FALSE	TRUE	Intergenic	AluJo|SINE|Alu	1520	NR_039619	100616481		NR_039619	ENSG00000266110	MIR4423	mir-4423	microRNA 4423	ncRNA	3.295	17.46	10.88	2.30667	1.355	2.51
Merged-chr1-85668057-5	chr1	85667727	85668236	FALSE	TRUE	TRUE	Intergenic	Intergenic	-1253	NM_032184	84144	Hs.533853	NM_032184	ENSG00000097096	SYDE2	-	synapse defective Rho GTPase homolog 2	protein-coding	5.315	16.1133	20.69	4.11	3.875	4.01
Merged-chr1-85716744-4	chr1	85716434	85717010	FALSE	FALSE	TRUE	non-coding (NR_024113, exon 4 of 4)	non-coding (NR_024113, exon 4 of 4)	8633	NM_198077	148423	Hs.26226	NM_198077	ENSG00000162642	C1orf52	gm117	chromosome 1 open reading frame 52	protein-coding	4.355	11.15	18.68	3.29667	0.97	2.51
Merged-chr1-87240316-3	chr1	87240022	87240554	FALSE	TRUE	FALSE	Intergenic	Intergenic	70035	NM_001206653	51100	Hs.136309	NM_016009	ENSG00000097033	SH3GLB1	Bif-1|CGI-61|PPP1R70|dJ612B15.2	SH3 domain containing GRB2 like, endophilin B1	protein-coding	6.74	45.46	12.125	6.67333	4.46	2.51
Merged-chr1-87246536-5	chr1	87246189	87246962	FALSE	TRUE	TRUE	Intergenic	L1MB2|LINE|L1	76322	NM_001206653	51100	Hs.136309	NM_016009	ENSG00000097033	SH3GLB1	Bif-1|CGI-61|PPP1R70|dJ612B15.2	SH3 domain containing GRB2 like, endophilin B1	protein-coding	5.9	50.2467	43.84	5.77333	4.46	6.52
Merged-chr1-87254307-3	chr1	87253974	87254782	FALSE	TRUE	FALSE	Intergenic	Intergenic	84125	NM_001206653	51100	Hs.136309	NM_016009	ENSG00000097033	SH3GLB1	Bif-1|CGI-61|PPP1R70|dJ612B15.2	SH3 domain containing GRB2 like, endophilin B1	protein-coding	4.945	35.5267	15.865	7.26333	6.98	6.52
Merged-chr1-87258901-3	chr1	87258676	87259100	FALSE	TRUE	FALSE	Intergenic	Intergenic	88635	NM_001206653	51100	Hs.136309	NM_016009	ENSG00000097033	SH3GLB1	Bif-1|CGI-61|PPP1R70|dJ612B15.2	SH3 domain containing GRB2 like, endophilin B1	protein-coding	5.015	28.9767	12.425	6.05667	4.07	5.01
Merged-chr1-87271715-6	chr1	87271408	87271960	TRUE	TRUE	TRUE	Intergenic	HERV9-int|LTR|ERV1	101431	NM_001206653	51100	Hs.136309	NM_016009	ENSG00000097033	SH3GLB1	Bif-1|CGI-61|PPP1R70|dJ612B15.2	SH3 domain containing GRB2 like, endophilin B1	protein-coding	12.435	58.86	31.94	2.75	3.49	4.01
Merged-chr1-87326349-5	chr1	87326063	87326742	FALSE	TRUE	TRUE	Intergenic	Intergenic	53646	NM_004261	9403	Hs.362728	NM_004261	ENSG00000183291	SELENOF	SEP15	selenoprotein F	protein-coding	8.39	41.09	21.37	6.33333	5.425	5.01
Merged-chr1-87692184-4	chr1	87692022	87692371	FALSE	FALSE	TRUE	intron (NM_001290053, intron 2 of 3)	intron (NM_001290053, intron 2 of 3)	13844	NM_001290053	101927844	Hs.694591	NM_001290053		LOC101927844	-	uncharacterized LOC101927844	protein-coding	3.195	9.07667	11.035	2.47	2.905	1
Merged-chr1-87794706-5	chr1	87794341	87795062	FALSE	TRUE	TRUE	5' UTR (NM_006769, exon 1 of 5)	5' UTR (NM_006769, exon 1 of 5)	550	NM_006769	8543	Hs.436792	NM_006769	ENSG00000143013	LMO4	-	LIM domain only 4	protein-coding	10.87	68.2633	36.81	6.18	6.2	3.01
Merged-chr1-88447643-5	chr1	88447311	88447929	FALSE	TRUE	TRUE	Intergenic	Intergenic	-610282	NR_038324	100505768	Hs.125247	NR_038324	ENSG00000227290	LINC01364	-	long intergenic non-protein coding RNA 1364	ncRNA	2.67	21.99	18.835	2.06	2.715	3.51
Merged-chr1-89510937-5	chr1	89510724	89511233	FALSE	TRUE	TRUE	Intergenic	MLT1F2|LTR|ERVL-MaLR	20065	NM_002053	2633	Hs.62661	NM_002053	ENSG00000117228	GBP1	-	guanylate binding protein 1	protein-coding	4.39	18.15	13.715	4.24	4.65	3.51
Merged-chr1-89872670-2	chr1	89872532	89872799	FALSE	FALSE	TRUE	promoter-TSS (NR_003133)	promoter-TSS (NR_003133)	-573	NR_003133	400759	Hs.661968	NR_003133	ENSG00000225492	GBP1P1	-	guanylate binding protein 1 pseudogene 1	pseudo	0.775	3.74	7.955	0.813333	1.36	1
Merged-chr1-90013639-5	chr1	90013187	90014281	FALSE	TRUE	TRUE	intron (NM_001134476, intron 2 of 7)	intron (NM_001134476, intron 2 of 7)	-10538	NM_015350	23507	Hs.482017	NM_015350	ENSG00000197147	LRRC8B	TA-LRRP|TALRRP	leucine rich repeat containing 8 VRAC subunit B	protein-coding	4.575	66.7767	35.72	6.59333	4.845	2
Merged-chr1-90021401-5	chr1	90021146	90021628	FALSE	TRUE	TRUE	intron (NM_001134476, intron 3 of 7)	intron (NM_001134476, intron 3 of 7)	-2885	NM_015350	23507	Hs.482017	NM_015350	ENSG00000197147	LRRC8B	TA-LRRP|TALRRP	leucine rich repeat containing 8 VRAC subunit B	protein-coding	3.885	26.1967	14.485	3.28333	2.135	2
Merged-chr1-90288760-6	chr1	90288270	90289226	FALSE	TRUE	TRUE	intron (NM_018103, intron 1 of 2)	intron (NM_018103, intron 1 of 2)	1268	NM_018103	55144	Hs.482087	NM_018103	ENSG00000171492	LRRC8D	LRRC5	leucine rich repeat containing 8 VRAC subunit D	protein-coding	6.915	41.4233	34.52	6.43333	4.845	6.01
Merged-chr1-90408818-3	chr1	90408617	90409039	FALSE	TRUE	FALSE	Intergenic	Intergenic	51697	NR_002830	492303	Hs.550796	NR_002830		GEMIN8P4	-	gem nuclear organelle associated protein 8 pseudogene 4	pseudo	5.79	17.12	8.795	4.38667	3.875	6.01
Merged-chr1-91425394-6	chr1	91425048	91425781	TRUE	TRUE	TRUE	intron (NM_201269, intron 2 of 5)	MER44C|DNA|TcMar-Tigger	61651	NM_016620	84146	Hs.173001	NM_016620	ENSG00000122482	ZNF644	BM-005|MYP21|NatF|ZEP-2	zinc finger protein 644	protein-coding	10.605	102.667	49.025	5.04667	4.265	4.01
Merged-chr1-91853078-3	chr1	91852975	91853148	TRUE	FALSE	FALSE	intron (NM_001017975, intron 4 of 38)	LSU-rRNA_Hsa|rRNA|rRNA	17365	NM_001017975	164045	Hs.454818	NM_001017975	ENSG00000162669	HFM1	MER3|POF9|SEC63D1|Si-11|Si-11-6|helicase	HFM1, ATP dependent DNA helicase homolog	protein-coding	10.235	4.6	1.515	4.31	3.295	19.55
Merged-chr1-91975970-4	chr1	91975796	91976146	FALSE	TRUE	FALSE	intron (NM_001134420, intron 4 of 11)	L2a|LINE|L2	9306	NM_001134420	8317	Hs.533573	NM_003503	ENSG00000097046	CDC7	CDC7L1|HsCDC7|Hsk1|huCDC7	cell division cycle 7	protein-coding	2.275	14.92	10.22	1.24	1.165	2.51
Merged-chr1-92057146-5	chr1	92056833	92057543	FALSE	TRUE	TRUE	Intergenic	Intergenic	90523	NM_001134420	8317	Hs.533573	NM_003503	ENSG00000097046	CDC7	CDC7L1|HsCDC7|Hsk1|huCDC7	cell division cycle 7	protein-coding	2.055	19.7833	12.9	3.55	3.68	3.01
Merged-chr1-92292100-4	chr1	92291928	92292306	FALSE	TRUE	FALSE	intron (NR_036634, intron 2 of 17)	MLT1L|LTR|ERVL-MaLR	59719	NM_003243	7049	Hs.482390	NM_003243	ENSG00000069702	TGFBR3	BGCAN|betaglycan	transforming growth factor beta receptor 3	protein-coding	2.49	14.7067	10.56	2.19	3.1	2.51
Merged-chr1-92317403-4	chr1	92317160	92317589	FALSE	TRUE	FALSE	intron (NR_036634, intron 2 of 17)	intron (NR_036634, intron 2 of 17)	34462	NM_003243	7049	Hs.482390	NM_003243	ENSG00000069702	TGFBR3	BGCAN|betaglycan	transforming growth factor beta receptor 3	protein-coding	2.905	26.7233	9.5	4.10333	1.55	4.01
Merged-chr1-92562130-4	chr1	92561954	92562313	FALSE	FALSE	TRUE	intron (NM_183242, intron 2 of 8)	AluJo|SINE|Alu	16271	NM_183242	284697	Hs.676102	NM_183242	ENSG00000189195	BTBD8	-	BTB domain containing 8	protein-coding	1.795	14.9733	8.365	0.826667	1.555	1.5
Merged-chr1-93283033-4	chr1	93282831	93283279	FALSE	FALSE	TRUE	Intergenic	Intergenic	-14488	NM_000969	6125	Hs.532359	NM_000969	ENSG00000122406	RPL5	L5|MSTP030|PPP1R135|uL18	ribosomal protein L5	protein-coding	1.025	25.7867	13.58	3.54	4.07	1
Merged-chr1-93288813-3	chr1	93288491	93289116	FALSE	TRUE	FALSE	Intergenic	Intergenic	-8740	NM_000969	6125	Hs.532359	NM_000969	ENSG00000122406	RPL5	L5|MSTP030|PPP1R135|uL18	ribosomal protein L5	protein-coding	6.595	26.7533	9.25	4.39	3.105	6.01
Merged-chr1-93482014-4	chr1	93481770	93482268	FALSE	TRUE	FALSE	Intergenic	Intergenic	-54940	NM_001252270	388650	Hs.180946	NM_001006605	ENSG00000154511	FAM69A	-	family with sequence similarity 69 member A	protein-coding	3.445	22.6233	8.795	2.21667	3.295	3.51
Merged-chr1-93645228-4	chr1	93645064	93645400	FALSE	TRUE	FALSE	intron (NM_001167830, intron 1 of 4)	intron (NM_001167830, intron 1 of 4)	1014	NM_001167830	50999	Hs.482873	NM_016040	ENSG00000117500	TMED5	CGI-100|p24g2|p28	transmembrane p24 trafficking protein 5	protein-coding	3.75	14.22	9.975	3.16	2.52	2
Merged-chr1-94083203-6	chr1	94082887	94083679	TRUE	TRUE	TRUE	intron (NM_003567, intron 3 of 11)	intron (NM_003567, intron 3 of 11)	-3581	NM_001261410	8412	Hs.36958	NM_003567	ENSG00000137936	BCAR3	AND-34|NSP2|SH2D3B	BCAR3, NSP family adaptor protein	protein-coding	24.785	80.44	65.71	9.57	7.37	10.52
Merged-chr1-94224624-6	chr1	94224203	94225010	TRUE	TRUE	TRUE	intron (NR_148965, intron 1 of 1)	intron (NR_148965, intron 1 of 1)	16333	NR_148965	723788	Hs.659312	NR_148965	ENSG00000230439	MIG7	-	mig-7	ncRNA	19.145	71.52	64.69	7.92333	5.815	7.02
Merged-chr1-94412855-5	chr1	94412524	94413190	FALSE	TRUE	TRUE	Intergenic	L1MA4A|LINE|L1	-37703	NM_001308253	2730	Hs.315562	NM_002061	ENSG00000023909	GCLM	GLCLR	glutamate-cysteine ligase modifier subunit	protein-coding	3.75	39.5867	19.04	3.97	3.1	4.01
Merged-chr1-94430376-5	chr1	94430016	94430590	FALSE	TRUE	TRUE	Intergenic	Intergenic	-55149	NM_001308253	2730	Hs.315562	NM_002061	ENSG00000023909	GCLM	GLCLR	glutamate-cysteine ligase modifier subunit	protein-coding	3.815	40.07	21.01	5.05	1.36	4.01
Merged-chr1-94480792-5	chr1	94480442	94481181	FALSE	TRUE	TRUE	intron (NM_000350, intron 37 of 49)	intron (NM_000350, intron 37 of 49)	-105657	NM_001308253	2730	Hs.315562	NM_002061	ENSG00000023909	GCLM	GLCLR	glutamate-cysteine ligase modifier subunit	protein-coding	2.49	56.6933	25.315	6.16	2.135	2.51
Merged-chr1-94483185-3	chr1	94483057	94483307	FALSE	TRUE	FALSE	intron (NM_000350, intron 36 of 49)	L1MC4|LINE|L1	103523	NM_000350	24	Hs.416707	NM_000350	ENSG00000198691	ABCA4	ABC10|ABCR|ARMD2|CORD3|FFM|RMP|RP19|STGD|STGD1	ATP binding cassette subfamily A member 4	protein-coding	1.395	6.90667	3.105	0.536667	0.585	1.5
Merged-chr1-94499769-3	chr1	94499580	94500043	FALSE	TRUE	FALSE	intron (NM_000350, intron 26 of 49)	LTR3B_|LTR|ERVK	86894	NM_000350	24	Hs.416707	NM_000350	ENSG00000198691	ABCA4	ABC10|ABCR|ARMD2|CORD3|FFM|RMP|RP19|STGD|STGD1	ATP binding cassette subfamily A member 4	protein-coding	2.605	23.7033	6.78	4.76667	2.325	5.01
Merged-chr1-94581300-3	chr1	94581112	94581494	FALSE	TRUE	FALSE	intron (NM_000350, intron 1 of 49)	intron (NM_000350, intron 1 of 49)	5402	NM_000350	24	Hs.416707	NM_000350	ENSG00000198691	ABCA4	ABC10|ABCR|ARMD2|CORD3|FFM|RMP|RP19|STGD|STGD1	ATP binding cassette subfamily A member 4	protein-coding	1.395	14.7533	5.87	1.79667	0.97	0.5
Merged-chr1-94609570-4	chr1	94609284	94609782	FALSE	FALSE	TRUE	Intergenic	Intergenic	-22828	NM_000350	24	Hs.416707	NM_000350	ENSG00000198691	ABCA4	ABC10|ABCR|ARMD2|CORD3|FFM|RMP|RP19|STGD|STGD1	ATP binding cassette subfamily A member 4	protein-coding	2.055	18.4633	13.395	3.01667	2.52	3.01
Merged-chr1-94849675-4	chr1	94849495	94849878	FALSE	TRUE	FALSE	Intergenic	Intergenic	-34247	NM_002858	5825	Hs.700576	NM_002858	ENSG00000117528	ABCD3	ABC43|CBAS5|PMP70|PXMP1|ZWS2	ATP binding cassette subfamily D member 3	protein-coding	2.93	21.1367	9.5	4.63667	5.62	1.5
Merged-chr1-95094987-4	chr1	95094815	95095166	FALSE	TRUE	FALSE	Intergenic	MIRc|SINE|MIR	-87577	NM_001993	2152	Hs.62192	NM_001993	ENSG00000117525	F3	CD142|TF|TFA	coagulation factor III, tissue factor	protein-coding	2.055	20.3033	9.745	3.14667	1.55	1.5
Merged-chr1-95123643-6	chr1	95123418	95123911	TRUE	TRUE	TRUE	intron (NR_104131, intron 4 of 4)	intron (NR_104131, intron 4 of 4)	87792	NR_039620	100616321		NR_039620	ENSG00000263526	MIR378G	-	microRNA 378g	ncRNA	8.24	40.8867	24.595	4.27333	2.52	4.01
Merged-chr1-95239732-4	chr1	95239419	95240022	FALSE	TRUE	FALSE	intron (NR_104131, intron 1 of 4)	intron (NR_104131, intron 1 of 4)	-28264	NR_039620	100616321		NR_039620	ENSG00000263526	MIR378G	-	microRNA 378g	ncRNA	6.34	26.7167	15.005	5.90333	2.715	4.51
Merged-chr1-95561612-5	chr1	95561313	95562034	FALSE	TRUE	TRUE	intron (NM_001199679, intron 1 of 6)	intron (NM_001199679, intron 1 of 6)	3600	NM_001199679	148534	Hs.483512	NM_152487	ENSG00000152078	TMEM56	-	transmembrane protein 56	protein-coding	6.49	33.5167	27.83	5.47667	3.685	5.01
Merged-chr1-95753468-4	chr1	95753083	95753682	FALSE	TRUE	FALSE	Intergenic	Charlie4a|DNA|hAT-Charlie	30437	NR_135588	100996630	Hs.662270	NR_135588	ENSG00000228504	LINC01760	-	long intergenic non-protein coding RNA 1760	ncRNA	4.88	32.7733	10.245	2.47333	3.49	2.51
Merged-chr1-99997337-3	chr1	99997175	99997512	FALSE	FALSE	TRUE	Intergenic	Intergenic	-43983	NR_125951	101928270	Hs.576048	NR_125951	ENSG00000224445	LINC01708	-	long intergenic non-protein coding RNA 1708	ncRNA	2.605	7.87667	8.995	1.49667	1.94	1.5
Merged-chr1-100110967-4	chr1	100110765	100111307	FALSE	TRUE	FALSE	promoter-TSS (NM_017734)	promoter-TSS (NM_017734)	-395	NM_017734	54873	Hs.483993	NM_017734	ENSG00000099260	PALMD	C1orf11|PALML	palmdelphin	protein-coding	6.71	31.1633	13.755	4.24	6.2	4.01
Merged-chr1-100127578-5	chr1	100127408	100127789	FALSE	TRUE	TRUE	intron (NM_017734, intron 1 of 7)	intron (NM_017734, intron 1 of 7)	16167	NM_017734	54873	Hs.483993	NM_017734	ENSG00000099260	PALMD	C1orf11|PALML	palmdelphin	protein-coding	2.825	18.0167	13.805	3.01333	3.875	1.5
Merged-chr1-100719322-3	chr1	100719212	100719438	FALSE	FALSE	TRUE	Intergenic	AluJo|SINE|Alu	-3916	NM_001918	1629	Hs.709187	NM_001918	ENSG00000137992	DBT	BCATE2|BCKAD-E2|BCKADE2|BCOADC-E2|E2|E2B	dihydrolipoamide branched chain transacylase E2	protein-coding	1.43	7.92667	10.745	1.78333	1.94	1
Merged-chr1-100788761-7	chr1	100788227	100789451	TRUE	TRUE	TRUE	Intergenic	L3|LINE|CR1	-21732	NM_001319211	8556	Hs.127411	NM_003672	ENSG00000079335	CDC14A	DFNB105|cdc14|hCDC14	cell division cycle 14A	protein-coding	19.54	103.313	100.275	8.80667	6.98	9.02
Merged-chr1-100945595-5	chr1	100945282	100945906	FALSE	TRUE	TRUE	intron (NM_003672, intron 10 of 15)	L1MB4|LINE|L1	-58134	NM_022049	54112	Hs.170053	NM_022049	ENSG00000181656	GPR88	COCPMR|STRG	G protein-coupled receptor 88	protein-coding	5.89	54.3967	38.985	5.63333	3.1	6.52
Merged-chr1-100951553-4	chr1	100951335	100951872	FALSE	TRUE	FALSE	TTS (NM_033313)	TTS (NM_033313)	-52125	NM_022049	54112	Hs.170053	NM_022049	ENSG00000181656	GPR88	COCPMR|STRG	G protein-coupled receptor 88	protein-coding	5.235	35.5967	14.87	5.62	4.07	5.01
Merged-chr1-100981493-3	chr1	100981138	100981674	FALSE	TRUE	FALSE	intron (NM_001319210, intron 16 of 16)	intron (NM_001319210, intron 16 of 16)	-22322	NM_022049	54112	Hs.170053	NM_022049	ENSG00000181656	GPR88	COCPMR|STRG	G protein-coupled receptor 88	protein-coding	6.455	23.11	9.25	5.64	3.685	4.01
Merged-chr1-101469844-3	chr1	101469624	101470132	FALSE	TRUE	FALSE	intron (NM_001077395, intron 4 of 7)	intron (NM_001077395, intron 4 of 7)	21484	NM_015958	51611	Hs.440776	NM_015958	ENSG00000117543	DPH5	AD-018|CGI-30|HSPC143|NPD015	diphthamide biosynthesis 5	protein-coding	3.92	24.8467	10.155	4.93667	5.815	4.01
Merged-chr1-101472422-4	chr1	101472253	101472608	FALSE	TRUE	FALSE	intron (NM_001077395, intron 4 of 7)	intron (NM_001077395, intron 4 of 7)	18932	NM_015958	51611	Hs.440776	NM_015958	ENSG00000117543	DPH5	AD-018|CGI-30|HSPC143|NPD015	diphthamide biosynthesis 5	protein-coding	3.125	24.5067	9.725	3.15	1.94	3.51
Merged-chr1-101659438-4	chr1	101659116	101659676	FALSE	TRUE	FALSE	Intergenic	Intergenic	42688	NR_104626	101928370	Hs.534209	NR_104626		LOC101928370	-	uncharacterized LOC101928370	ncRNA	4.025	37.1967	12.015	4.37667	3.3	3.51
Merged-chr1-101757443-5	chr1	101757045	101757830	FALSE	TRUE	TRUE	Intergenic	Intergenic	-31956	NR_126402	104355286	Hs.568671	NR_126402	ENSG00000231671	LINC01307	-	long intergenic non-protein coding RNA 1307	ncRNA	8.08	42.77	29.08	4.51333	6.205	3.01
Merged-chr1-105190889-3	chr1	105190645	105191127	FALSE	TRUE	FALSE	Intergenic	Intergenic	575241	NR_033990	100129138	Hs.514487	NR_033990	ENSG00000215869	LOC100129138	-	THAP domain containing 3 pseudogene	pseudo	2.755	13.5533	6.255	2.32	1.745	2
Merged-chr1-106565247-5	chr1	106564909	106565710	FALSE	TRUE	TRUE	intron (NR_146609, intron 3 of 5)	intron (NR_146609, intron 3 of 5)	5566	NR_146609	105378884	Hs.568533	NR_146609		LINC01677	-	long intergenic non-protein coding RNA 1677	ncRNA	7.585	48.1667	35.34	4.25333	3.88	2.51
Merged-chr1-107690598-5	chr1	107690397	107690813	FALSE	TRUE	TRUE	promoter-TSS (NM_001113226)	promoter-TSS (NM_001113226)	-86	NM_001113226	22854	Hs.133046	NM_014917	ENSG00000162631	NTNG1	Lmnt1	netrin G1	protein-coding	3.63	23.1433	15.005	1.77667	1.745	2
Merged-chr1-107705512-3	chr1	107705333	107705667	FALSE	FALSE	TRUE	intron (NM_001312688, intron 2 of 7)	intron (NM_001312688, intron 2 of 7)	14809	NM_001113228	22854	Hs.133046	NM_014917	ENSG00000162631	NTNG1	Lmnt1	netrin G1	protein-coding	1.835	8.97333	12.99	2.32	1.94	2.51
Merged-chr1-108252899-3	chr1	108252669	108253244	FALSE	TRUE	FALSE	intron (NM_006113, intron 15 of 26)	intron (NM_006113, intron 15 of 26)	-21830	NM_001079874	10451	Hs.267659	NM_006113	ENSG00000134215	VAV3	-	vav guanine nucleotide exchange factor 3	protein-coding	3.195	18.87	7.07	3.17667	2.715	4.51
Merged-chr1-108293056-5	chr1	108292729	108293274	FALSE	TRUE	TRUE	intron (NM_006113, intron 13 of 26)	intron (NM_006113, intron 13 of 26)	-61875	NM_001079874	10451	Hs.267659	NM_006113	ENSG00000134215	VAV3	-	vav guanine nucleotide exchange factor 3	protein-coding	2.855	19.5833	13.44	3.57333	3.68	3.01
Merged-chr1-109432650-4	chr1	109432450	109432966	FALSE	TRUE	FALSE	intron (NM_013296, intron 2 of 14)	L2c|LINE|L2	13105	NM_013296	29899	Hs.584901	NM_013296	ENSG00000121957	GPSM2	CMCS|DFNB82|LGN|PINS	G protein signaling modulator 2	protein-coding	1.395	18.46	9.025	3.97333	4.075	4.01
Merged-chr1-109647627-3	chr1	109647481	109647896	FALSE	TRUE	FALSE	TTS (NM_001122961)	TTS (NM_001122961)	4873	NR_003023	677766	Hs.550815	NR_003023	ENSG00000278249	SCARNA2	HBII-382|mgU2-25/61	small Cajal body-specific RNA 2	ncRNA	4.33	18.8533	6.87	3.29667	3.49	2
Merged-chr1-109757540-5	chr1	109757134	109757915	FALSE	TRUE	TRUE	non-coding (NR_034072, exon 2 of 2)	non-coding (NR_034072, exon 2 of 2)	1009	NM_006513	6301	Hs.531176	NM_006513	ENSG00000031698	SARS	NEDMAS|SERRS|SERS	seryl-tRNA synthetase	protein-coding	12.05	60.8733	53.425	6.98333	6.395	11.03
Merged-chr1-109842073-4	chr1	109841780	109842315	FALSE	FALSE	TRUE	intron (NM_001010985, intron 1 of 8)	intron (NM_001010985, intron 1 of 8)	7616	NM_001010985	343263	Hs.443402	NM_001010985	ENSG00000221986	MYBPHL	-	myosin binding protein H like	protein-coding	5.755	21.0867	18.11	6.04	5.815	6.52
Merged-chr1-110127609-4	chr1	110127385	110127812	FALSE	FALSE	TRUE	intron (NM_006496, intron 5 of 8)	intron (NM_006496, intron 5 of 8)	-13917	NR_029583	406974		NR_029583	ENSG00000284443	MIR197	MIRN197|miR-197|miRNA197	microRNA 197	ncRNA	3.41	15.3467	13.415	2.59667	2.91	0.5
Merged-chr1-110143846-4	chr1	110143613	110144069	FALSE	FALSE	TRUE	Intergenic	Charlie4|DNA|hAT-Charlie	2326	NR_029583	406974		NR_029583	ENSG00000284443	MIR197	MIRN197|miR-197|miRNA197	microRNA 197	ncRNA	2.67	14.78	13.44	2.44667	1.745	2
Merged-chr1-110502658-3	chr1	110502412	110502870	FALSE	TRUE	FALSE	Intergenic	Intergenic	-24746	NM_006621	10768	Hs.743973	NM_006621	ENSG00000168710	AHCYL1	DCAL|IRBIT|PPP1R78|PRO0233|XPVKONA	adenosylhomocysteinase like 1	protein-coding	4.585	36.43	10.95	4.92333	7.175	3.01
Merged-chr1-110625345-4	chr1	110625079	110625516	FALSE	FALSE	TRUE	promoter-TSS (NR_126382)	promoter-TSS (NR_126382)	-13	NR_126382	104355139	Hs.628193	NR_126382	ENSG00000258673	LINC01397	-	long intergenic non-protein coding RNA 1397	ncRNA	1.28	10.3967	8.77	1.65	1.745	2
Merged-chr1-111506960-6	chr1	111506671	111507260	FALSE	TRUE	TRUE	promoter-TSS (NM_018372)	promoter-TSS (NM_018372)	-399	NM_001006945	55791	Hs.25245	NM_018372	ENSG00000121931	LRIF1	C1orf103|RIF1	ligand dependent nuclear receptor interacting factor 1	protein-coding	10.215	46.2467	30.6	6.72333	6.01	2
Merged-chr1-111946081-4	chr1	111945926	111946346	FALSE	TRUE	FALSE	Intergenic	Intergenic	-13663	NR_029429	441897	Hs.568387	NR_029429	ENSG00000227179	PGCP1	-	progastricsin pseudogene 1	pseudo	1.025	12.3533	5.01	0.813333	1.36	1
Merged-chr1-112290151-5	chr1	112289976	112290299	FALSE	TRUE	TRUE	non-coding (NR_038951, exon 3 of 3)	non-coding (NR_038951, exon 3 of 3)	7674	NR_038951	100506343	Hs.485810	NR_038951	ENSG00000227811	INKA2-AS1	FAM212B-AS1	INKA2 antisense RNA 1	ncRNA	2.72	21.06	14.145	2.46667	1.745	1.5
Merged-chr1-112715058-5	chr1	112714874	112715235	FALSE	TRUE	TRUE	Intergenic	Intergenic	181896	NR_145438	643355	Hs.279714	NR_145438	ENSG00000231437	LINC01750	-	long intergenic non-protein coding RNA 1750	ncRNA	1.98	13.0233	13.825	1.09667	2.52	4.01
Merged-chr1-112861957-3	chr1	112861746	112862151	FALSE	TRUE	FALSE	Intergenic	Intergenic	-76852	NM_018704	55917	Hs.744100	NM_018704	ENSG00000143079	CTTNBP2NL	-	CTTNBP2 N-terminal like	protein-coding	1.575	13.3933	4.715	2.21667	0.97	1
Merged-chr1-113086836-5	chr1	113086452	113087215	FALSE	TRUE	TRUE	intron (NM_138728, intron 12 of 13)	intron (NM_138728, intron 12 of 13)	35463	NM_024494	7482	Hs.258575	NM_004185	ENSG00000134245	WNT2B	WNT13	Wnt family member 2B	protein-coding	7.645	49.0133	25.07	6.16667	3.685	5.51
Merged-chr1-113478608-5	chr1	113478164	113479041	FALSE	TRUE	TRUE	intron (NM_003051, intron 1 of 4)	L1MEg|LINE|L1	12630	NR_002796	246182	Hs.647691	NR_002796		AKR7A2P1	AFARP1	aldo-keto reductase family 7 member A2 pseudogene 1	pseudo	3.885	49.33	26.635	5.2	4.85	7.02
Merged-chr1-113683424-4	chr1	113683230	113683652	FALSE	TRUE	FALSE	Intergenic	Intergenic	65434	NR_038846	643441	Hs.124895	NR_038846		LOC643441	-	uncharacterized LOC643441	ncRNA	3.445	26.22	11.9	4.13667	2.905	4.51
Merged-chr1-113936580-3	chr1	113936419	113936726	FALSE	TRUE	FALSE	intron (NM_001142782, intron 1 of 20)	intron (NM_001142782, intron 1 of 20)	3097	NM_152900	260425	Hs.486189	NM_020965	ENSG00000081026	MAGI3	MAGI-3|dJ730K3.2	membrane associated guanylate kinase, WW and PDZ domain containing 3	protein-coding	2.305	10.6667	5.915	1.50667	1.355	2
Merged-chr1-114213452-5	chr1	114213303	114213614	FALSE	TRUE	TRUE	intron (NM_001142782, intron 16 of 20)	MIR|SINE|MIR	88319	NM_006608	10745	Hs.655824	NM_006608	ENSG00000116793	PHTF1	PHTF	putative homeodomain transcription factor 1	protein-coding	1.43	11.23	9.27	1.92333	0.78	1
Merged-chr1-114347616-5	chr1	114347415	114347896	FALSE	TRUE	TRUE	intron (NM_018364, intron 1 of 6)	intron (NM_018364, intron 1 of 6)	7443	NR_130896	54665	Hs.486285	NM_018364	ENSG00000081019	RSBN1	KDM9|ROSBIN	round spermatid basic protein 1	protein-coding	8.09	39.64	14.735	4.92	4.265	3.01
Merged-chr1-114472005-4	chr1	114471752	114472182	FALSE	TRUE	FALSE	promoter-TSS (NR_110725)	promoter-TSS (NR_110725)	-29	NM_198268	204851	Hs.532363	NM_152696	ENSG00000163349	HIPK1	Myak|Nbak2	homeodomain interacting protein kinase 1	protein-coding	3.515	16.0767	11.445	3.86333	4.455	6.52
Merged-chr1-114980642-4	chr1	114980486	114980825	FALSE	FALSE	TRUE	intron (NM_015906, intron 4 of 19)	FLAM_A|SINE|Alu	73126	NM_015906	51592	Hs.26837	NM_015906	ENSG00000197323	TRIM33	ECTO|PTC7|RFG7|TF1G|TIF1G|TIF1GAMMA|TIFGAMMA	tripartite motif containing 33	protein-coding	2.89	13.8833	9.475	2.32667	1.165	2
Merged-chr1-115010387-4	chr1	115010118	115010653	FALSE	TRUE	FALSE	intron (NM_015906, intron 1 of 19)	intron (NM_015906, intron 1 of 19)	43396	NM_015906	51592	Hs.26837	NM_015906	ENSG00000197323	TRIM33	ECTO|PTC7|RFG7|TF1G|TIF1G|TIF1GAMMA|TIFGAMMA	tripartite motif containing 33	protein-coding	5.165	24.6667	10.765	4.80667	4.265	5.01
Merged-chr1-115322569-4	chr1	115322307	115322826	FALSE	TRUE	FALSE	intron (NR_049742, intron 1 of 3)	intron (NR_049742, intron 1 of 3)	742	NM_025073	80143	Hs.709277	NM_025073	ENSG00000052723	SIKE1	SIKE	suppressor of IKBKE 1	protein-coding	4.625	18.47	11.065	2.33667	2.91	5.01
Merged-chr1-115711492-5	chr1	115711159	115711799	FALSE	TRUE	TRUE	Intergenic	Intergenic	-79358	NM_001308315	10100	Hs.310458	NM_005725	ENSG00000134198	TSPAN2	NET3|TSN2|TSPAN-2	tetraspanin 2	protein-coding	2.305	25.82	12.92	2.05	1.745	3.51
Merged-chr1-115973601-3	chr1	115973362	115973933	FALSE	TRUE	FALSE	Intergenic	Intergenic	-92790	NM_002506	4803	Hs.2561	NM_002506	ENSG00000134259	NGF	Beta-NGF|HSAN5|NGFB	nerve growth factor	protein-coding	1.21	15.7367	6.935	3.05333	1.355	2.51
Merged-chr1-116227896-4	chr1	116227731	116228057	FALSE	FALSE	TRUE	intron (NM_138959, intron 6 of 7)	intron (NM_138959, intron 6 of 7)	42644	NM_001172412	81839	Hs.515130	NM_138959	ENSG00000173218	VANGL1	KITENIN|LPP2|STB2|STBM2	VANGL planar cell polarity protein 1	protein-coding	0.875	9.14333	8.685	0.54	1.165	0.5
Merged-chr1-116520441-5	chr1	116520147	116520680	FALSE	TRUE	TRUE	promoter-TSS (NR_125970)	promoter-TSS (NR_125970)	-516	NR_125970	101928977	Hs.627914	NR_125970		LOC101928977	-	uncharacterized LOC101928977	ncRNA	2.42	30.8733	12.035	2.19	1.55	1.5
Merged-chr1-116821067-5	chr1	116820890	116821294	FALSE	TRUE	TRUE	Intergenic	Intergenic	-94703	NM_000701	476	Hs.371889	NM_000701	ENSG00000163399	ATP1A1	-	ATPase Na+/K+ transporting subunit alpha 1	protein-coding	1.915	12.4367	10.405	2.74333	1.745	1.5
Merged-chr1-116854896-4	chr1	116854701	116855075	FALSE	TRUE	FALSE	Intergenic	Intergenic	-60907	NM_000701	476	Hs.371889	NM_000701	ENSG00000163399	ATP1A1	-	ATPase Na+/K+ transporting subunit alpha 1	protein-coding	2.605	18.52	10.47	4.53333	2.715	3.51
Merged-chr1-116877117-4	chr1	116876839	116877504	FALSE	TRUE	FALSE	Intergenic	Intergenic	-38624	NM_000701	476	Hs.371889	NM_000701	ENSG00000163399	ATP1A1	-	ATPase Na+/K+ transporting subunit alpha 1	protein-coding	7.805	31.1733	10.835	3.55333	4.265	5.01
Merged-chr1-116895972-4	chr1	116895821	116896143	FALSE	FALSE	TRUE	Intergenic	Intergenic	-19813	NM_000701	476	Hs.371889	NM_000701	ENSG00000163399	ATP1A1	-	ATPase Na+/K+ transporting subunit alpha 1	protein-coding	1.245	11.3867	15.755	1.10333	2.13	1
Merged-chr1-116920851-4	chr1	116920577	116921180	FALSE	FALSE	TRUE	intron (NM_001160233, intron 1 of 22)	intron (NM_001160233, intron 1 of 22)	4389	NM_001160233	476	Hs.371889	NM_000701	ENSG00000163399	ATP1A1	-	ATPase Na+/K+ transporting subunit alpha 1	protein-coding	4.325	21.0667	15.57	5.62	4.65	3.51
Merged-chr1-116962146-4	chr1	116961945	116962321	FALSE	FALSE	TRUE	promoter-TSS (NR_027646)	promoter-TSS (NR_027646)	-889	NR_027646	84852	Hs.664752	NM_032766	ENSG00000203865	ATP1A1-AS1	ATP1A1OS|C1orf203	ATP1A1 antisense RNA 1	ncRNA	2.42	14.3467	10.52	2.04667	1.94	3.01
Merged-chr1-117079911-5	chr1	117079608	117080435	FALSE	TRUE	TRUE	intron (NM_001779, intron 2 of 5)	MER46C|DNA|TcMar-Tigger	33694	NR_026665	965	Hs.34341	NM_001779	ENSG00000116815	CD58	LFA-3|LFA3|ag3	CD58 molecule	protein-coding	4.475	31.81	21.145	4.81667	3.88	6.01
Merged-chr1-117191207-5	chr1	117191050	117191393	FALSE	TRUE	TRUE	intron (NM_001007237, intron 2 of 10)	intron (NM_001007237, intron 2 of 10)	18357	NM_001542	3321	Hs.171057	NM_001542	ENSG00000143061	IGSF3	EWI-3|LCDD|V8	immunoglobulin superfamily member 3	protein-coding	1.98	12.5533	7.295	1.36667	0.195	0.5
Merged-chr1-117230521-5	chr1	117230294	117230795	FALSE	TRUE	TRUE	Intergenic	Intergenic	-6190	NR_149353	388667	Hs.127851	NR_149353	ENSG00000203864	C1orf137	-	chromosome 1 open reading frame 137 (putative)	ncRNA	5.21	27.2667	18.065	1.92333	2.33	2
Merged-chr1-117321115-5	chr1	117320537	117321424	FALSE	TRUE	TRUE	Intergenic	Intergenic	23928	NM_001328609	914	Hs.523500	NM_001767	ENSG00000116824	CD2	LFA-2|SRBC|T11	CD2 molecule	protein-coding	4.365	28.2233	20.67	7.12667	5.815	4.51
Merged-chr1-117549992-5	chr1	117549550	117550490	FALSE	TRUE	TRUE	intron (NM_001256109, intron 1 of 9)	AluSq|SINE|Alu	5648	NM_001256109	9398	Hs.654598	NM_004258	ENSG00000134256	CD101	EWI-101|IGSF2|V7	CD101 molecule	protein-coding	10.06	87.7133	38.125	6.56333	6.785	2.51
Merged-chr1-118229773-3	chr1	118229586	118229950	FALSE	TRUE	FALSE	Intergenic	Intergenic	81164	NM_017709	54855	Hs.356216	NM_017709	ENSG00000183508	TENT5C	FAM46C	terminal nucleotidyltransferase 5C	protein-coding	1.98	13.39	4.895	1.93667	1.55	3.01
Merged-chr1-118389869-3	chr1	118389548	118390094	FALSE	TRUE	FALSE	Intergenic	Intergenic	82481	NM_017686	54834	Hs.310809	NM_017686	ENSG00000196505	GDAP2	MACROD3	ganglioside induced differentiation associated protein 2	protein-coding	5.705	18.9233	8.205	4.51667	4.07	4.51
Merged-chr1-118442650-4	chr1	118442492	118442801	FALSE	FALSE	TRUE	intron (NM_001135589, intron 6 of 12)	Looper|DNA|PiggyBac	29656	NM_017686	54834	Hs.310809	NM_017686	ENSG00000196505	GDAP2	MACROD3	ganglioside induced differentiation associated protein 2	protein-coding	1.095	7.64667	16.41	1.23667	0.97	1
Merged-chr1-119503399-5	chr1	119503173	119503676	FALSE	TRUE	TRUE	intron (NM_152380, intron 1 of 7)	intron (NM_152380, intron 1 of 7)	27052	NM_001330677	6913	Hs.146196	NM_152380	ENSG00000092607	TBX15	TBX14	T-box 15	protein-coding	7.32	58.89	19.31	5.07667	6.395	6.01
Merged-chr1-119506447-6	chr1	119505927	119506995	TRUE	TRUE	TRUE	intron (NM_152380, intron 1 of 7)	MLT1H2|LTR|ERVL-MaLR	24015	NM_001330677	6913	Hs.146196	NM_152380	ENSG00000092607	TBX15	TBX14	T-box 15	protein-coding	25.26	154.81	67.66	9.58333	9.885	9.02
Merged-chr1-120010785-3	chr1	120010664	120010900	FALSE	TRUE	FALSE	Intergenic	Intergenic	-39044	NM_000862	3283	Hs.364941	NM_000862	ENSG00000203857	HSD3B1	3BETAHSD|HSD3B|HSDB3|HSDB3A|I|SDR11E1	hydroxy-delta-5-steroid dehydrogenase, 3 beta- and steroid delta-isomerase 1	protein-coding	1.87	6.75667	1.245	0.96	0.39	0.5
Merged-chr1-120188638-5	chr1	120188418	120188833	FALSE	TRUE	TRUE	intron (NM_001080470, intron 1 of 2)	intron (NM_001080470, intron 1 of 2)	1765	NM_001080470	90874	Hs.381105	NM_001080470	ENSG00000143067	ZNF697	-	zinc finger protein 697	protein-coding	2.305	23.9367	16.115	2.33333	2.13	1.5
Merged-chr1-120255448-6	chr1	120254779	120255991	TRUE	TRUE	TRUE	intron (NM_006623, intron 1 of 11)	CpG	966	NM_006623	26227	Hs.487296	NM_006623	ENSG00000092621	PHGDH	3-PGDH|3PGDH|HEL-S-113|NLS|NLS1|PDG|PGAD|PGD|PGDH|PHGDHD|SERA	phosphoglycerate dehydrogenase	protein-coding	28.255	119.743	62.625	9.14667	7.365	9.02
Merged-chr1-120267574-5	chr1	120267324	120267865	FALSE	TRUE	TRUE	intron (NM_006623, intron 3 of 11)	intron (NM_006623, intron 3 of 11)	13175	NM_006623	26227	Hs.487296	NM_006623	ENSG00000092621	PHGDH	3-PGDH|3PGDH|HEL-S-113|NLS|NLS1|PDG|PGAD|PGD|PGDH|PHGDHD|SERA	phosphoglycerate dehydrogenase	protein-coding	7.76	40.7267	17.835	4.97	6.01	4.51
Merged-chr1-120324521-4	chr1	120324404	120324647	FALSE	FALSE	TRUE	Intergenic	L1ME3A|LINE|L1	-12970	NM_001166107	3158	Hs.59889	NM_005518	ENSG00000134240	HMGCS2	-	3-hydroxy-3-methylglutaryl-CoA synthase 2	protein-coding	1.025	5.26	7.275	0.276667	1.16	0
Merged-chr1-120619693-2	chr1	120619587	120619807	FALSE	FALSE	TRUE	Intergenic	Intergenic	-7380	NM_024408	4853	Hs.487360	NM_024408	ENSG00000134250	NOTCH2	AGS2|HJCYS|hN2	notch 2	protein-coding	0.84	4.49667	6.87	1.23667	1.94	2.51
Merged-chr1-120796072-3	chr1	120795860	120796201	FALSE	TRUE	FALSE	Intergenic	Intergenic	-42975	NM_001100910	653820	Hs.339665	NM_001100910	ENSG00000188610	FAM72B	p17	family with sequence similarity 72 member B	protein-coding	0.185	3.59	1.95	0.27	0	3.01
Merged-chr1-121142650-6	chr1	121141674	121143651	TRUE	TRUE	TRUE	Intergenic	(AAATG)n|Simple_repeat|Simple_repeat	-2897	NR_104189	100873165	Hs.568525	NR_104189	ENSG00000230806	SRGAP2-AS1	-	SRGAP2 antisense RNA 1	ncRNA	22.79	318.967	188.97	10.56	7.17	12.53
Merged-chr1-121225895-5	chr1	121225579	121226217	FALSE	TRUE	TRUE	Intergenic	ERVL-E-int|LTR|ERVL	-35012	NR_003955	647121	Hs.697682	NR_003955	ENSG00000231752	EMBP1	-	embigin pseudogene 1	pseudo	4.76	40.94	25.725	3.13333	2.52	3.01
Merged-chr1-121253550-6	chr1	121253114	121253919	TRUE	TRUE	TRUE	Intergenic	HERV9-int|LTR|ERV1	-7394	NR_003955	647121	Hs.697682	NR_003955	ENSG00000231752	EMBP1	-	embigin pseudogene 1	pseudo	20.405	83.0633	51.905	5.77	6.205	6.52
Merged-chr1-144529896-5	chr1	144529610	144530138	FALSE	TRUE	TRUE	intron (NM_001278267, intron 52 of 130)	intron (NM_001278267, intron 52 of 130)	-63814	NR_102404	728841	Hs.445080	NM_001037501		NBPF8	NBPF8P	NBPF member 8	protein-coding	3.295	40.4767	17.09	6.02	6.98	8.02
Merged-chr1-144989478-5	chr1	144989148	144989826	FALSE	TRUE	TRUE	intron (NM_001002812, intron 1 of 22)	intron (NM_001002812, intron 1 of 22)	5546	NM_001002810	9659	Hs.584841	NM_014644	ENSG00000178104	PDE4DIP	CMYA2|MMGL	phosphodiesterase 4D interacting protein	protein-coding	19.76	98.9	48.21	20.8133	15.51	21.05
Merged-chr1-145004307-3	chr1	145004165	145004421	FALSE	FALSE	TRUE	intron (NM_001198832, intron 3 of 45)	intron (NM_001198832, intron 3 of 45)	-7182	NM_001195260	9659	Hs.584841	NM_014644	ENSG00000178104	PDE4DIP	CMYA2|MMGL	phosphodiesterase 4D interacting protein	protein-coding	2.93	11.4133	14.01	4.11333	4.265	7.02
Merged-chr1-145015277-5	chr1	145015003	145015537	FALSE	TRUE	TRUE	intron (NM_001198832, intron 3 of 45)	MER44B|DNA|TcMar-Tigger	-18159	NM_001195260	9659	Hs.584841	NM_014644	ENSG00000178104	PDE4DIP	CMYA2|MMGL	phosphodiesterase 4D interacting protein	protein-coding	7.425	46.22	27.695	7.04	6.785	11.53
Merged-chr1-145395684-5	chr1	145395486	145395924	FALSE	TRUE	TRUE	intron (NM_001351365, intron 70 of 92)	intron (NM_001351365, intron 70 of 92)	-13301	NR_125968	101928979	Hs.735893	NR_125967	ENSG00000233396	LINC01719	-	long intergenic non-protein coding RNA 1719	ncRNA	3.48	36.6933	22.485	4.50667	4.07	4.51
Merged-chr1-146565083-5	chr1	146564847	146565324	FALSE	TRUE	TRUE	intron (NM_001351365, intron 73 of 94)	MER4A|LTR|ERV1	-8782	NR_121645	101447996		NR_121645		RNVU1-8	RNU1-145|vU1.8	RNA, variant U1 small nuclear 8	snRNA	1.72	30.6267	11.56	2.86667	1.745	2
Merged-chr1-146642585-4	chr1	146642292	146642901	FALSE	TRUE	FALSE	intron (NM_005399, intron 2 of 7)	intron (NM_005399, intron 2 of 7)	1572	NR_103871	5565	Hs.50732	NM_005399	ENSG00000131791	PRKAB2	-	protein kinase AMP-activated non-catalytic subunit beta 2	protein-coding	4.255	29.33	15.455	5.65667	4.845	7.02
Merged-chr1-147280291-5	chr1	147280119	147280450	FALSE	TRUE	TRUE	intron (NM_001351365, intron 72 of 94)	HSMAR1|DNA|TcMar-Mariner	-34818	NM_005266	2702	Hs.447968	NM_005266	ENSG00000265107	GJA5	ATFB11|CX40	gap junction protein alpha 5	protein-coding	4.51	30.0933	10.995	3.70333	1.55	2
Merged-chr1-147777276-5	chr1	147777008	147777540	FALSE	TRUE	TRUE	intron (NM_001351365, intron 71 of 94)	L1MEc|LINE|L1	29404	NR_049810	100847044		NR_049810	ENSG00000283676	MIR5087	-	microRNA 5087	ncRNA	3.59	13.5567	13.305	1.38333	1.935	2.51
Merged-chr1-148849617-6	chr1	148847403	148851459	TRUE	TRUE	TRUE	intron (NR_104217, intron 2 of 17).3	(CATTT)n|Simple_repeat|Simple_repeat	-26609	NR_136328	101927429	Hs.568236	NR_136328		LOC101927429	-	lysine methyltransferase 2C pseudogene	pseudo	100.68	1221.22	837.81	52.13	55.055	62.15
Merged-chr1-148900402-5	chr1	148900169	148900625	FALSE	TRUE	TRUE	intron (NR_136328, intron 9 of 9)	intron (NR_136328, intron 9 of 9)	-1448	NR_111001	1818	Hs.568236	NR_111001		DRD5P2	-	dopamine receptor D5 pseudogene 2	pseudo	3.825	48.8133	25.86	3.85	3.49	4.51
Merged-chr1-149980813-3	chr1	149980653	149980948	FALSE	TRUE	FALSE	intron (NM_020205, intron 1 of 11)	intron (NM_020205, intron 1 of 11)	1886	NM_020205	56957	Hs.98322	NM_020205	ENSG00000264522	OTUD7B	CEZANNE|ZA20D1	OTU deubiquitinase 7B	protein-coding	3.985	18.0467	7.12	5.08	3.295	2
Merged-chr1-150039383-5	chr1	150039097	150039713	FALSE	TRUE	TRUE	promoter-TSS (NM_001279354)	promoter-TSS (NM_001279354)	55	NM_001279353	11311	Hs.443750	NM_007259	ENSG00000136631	VPS45	H1|H1VPS45|SCN5|VPS45A|VPS45B|VPS54A|VSP45|VSP45A	vacuolar protein sorting 45 homolog	protein-coding	6.815	35.6767	29.56	6.72	6.785	8.02
Merged-chr1-150159040-5	chr1	150158833	150159247	FALSE	TRUE	TRUE	Intergenic	AluSx4|SINE|Alu	26114	NR_135098	105371433	Hs.599366	NR_135098		LOC105371433	-	uncharacterized LOC105371433	ncRNA	4.07	20.97	16.64	3.14333	3.88	3.01
Merged-chr1-150336666-4	chr1	150336501	150336835	FALSE	TRUE	FALSE	promoter-TSS (NM_015203)	promoter-TSS (NM_015203)	81	NM_001297674	23248	Hs.213666	NM_015203	ENSG00000163125	RPRD2	HSPC099|KIAA0460	regulation of nuclear pre-mRNA domain containing 2	protein-coding	2.67	18.3567	11.13	3.42333	3.685	1
Merged-chr1-150338267-4	chr1	150338092	150338442	FALSE	TRUE	FALSE	intron (NM_001297673, intron 1 of 10)	AluSq2|SINE|Alu	1680	NM_001297674	23248	Hs.213666	NM_015203	ENSG00000163125	RPRD2	HSPC099|KIAA0460	regulation of nuclear pre-mRNA domain containing 2	protein-coding	2.56	13.9933	9.95	1.78667	1.745	2
Merged-chr1-150370102-5	chr1	150369903	150370411	FALSE	TRUE	TRUE	intron (NM_001297673, intron 1 of 10)	L1ME1|LINE|L1	33570	NM_001297674	23248	Hs.213666	NM_015203	ENSG00000163125	RPRD2	HSPC099|KIAA0460	regulation of nuclear pre-mRNA domain containing 2	protein-coding	3.26	18.3367	21.33	2.72	2.71	3.51
Merged-chr1-150383658-4	chr1	150383166	150384105	FALSE	TRUE	FALSE	intron (NM_001297673, intron 1 of 10)	MIR|SINE|MIR	47048	NM_001297674	23248	Hs.213666	NM_015203	ENSG00000163125	RPRD2	HSPC099|KIAA0460	regulation of nuclear pre-mRNA domain containing 2	protein-coding	10.18	38.7567	18.29	10.4067	7.365	5.01
Merged-chr1-150446459-3	chr1	150446222	150446732	FALSE	TRUE	FALSE	3' UTR (NM_015203, exon 11 of 11)	3' UTR (NM_015203, exon 11 of 11)	-13363	NM_025150	80222	Hs.288974	NM_025150	ENSG00000143374	TARS2	COXPD21|TARSL1|thrRS	threonyl-tRNA synthetase 2, mitochondrial	protein-coding	6.05	22.45	13.62	4.95	5.04	4.51
Merged-chr1-150536754-5	chr1	150536539	150537001	FALSE	TRUE	TRUE	intron (NR_104133, intron 2 of 3)	MER58B|DNA|hAT-Charlie	10258	NR_104133	574406	Hs.516243	NM_001025493	ENSG00000203804	ADAMTSL4-AS1	C1orf138	ADAMTSL4 antisense RNA 1	ncRNA	3.885	40.74	17.795	4.38667	3.1	4.51
Merged-chr1-150577418-5	chr1	150577239	150577746	FALSE	TRUE	TRUE	Intergenic	LTR78|LTR|ERV1	24117	NM_207045	2029	Hs.632456	NM_004436	ENSG00000143420	ENSA	ARPP-19e	endosulfine alpha	protein-coding	9.235	23.9867	17.135	4.43	5.43	6.52
Merged-chr1-150584291-3	chr1	150584081	150584490	FALSE	TRUE	FALSE	Intergenic	Intergenic	17324	NM_207045	2029	Hs.632456	NM_004436	ENSG00000143420	ENSA	ARPP-19e	endosulfine alpha	protein-coding	3.63	20.9433	10.11	5.21333	4.26	2.51
Merged-chr1-150611140-5	chr1	150610967	150611286	FALSE	TRUE	TRUE	Intergenic	AluSq2|SINE|Alu	-9028	NM_207042	2029	Hs.632456	NM_004436	ENSG00000143420	ENSA	ARPP-19e	endosulfine alpha	protein-coding	0.84	17.0333	7.57	1.79333	1.165	0.5
Merged-chr1-150740313-3	chr1	150740175	150740456	FALSE	TRUE	FALSE	Intergenic	AluJb|SINE|Alu	-1882	NM_001199739	1520	Hs.181301	NM_004079	ENSG00000163131	CTSS	-	cathepsin S	protein-coding	3.875	18.4633	7.16	4.00333	2.13	1
Merged-chr1-150954017-4	chr1	150953871	150954186	FALSE	FALSE	TRUE	promoter-TSS (NM_003568)	promoter-TSS (NM_003568)	-471	NM_003568	8416	Hs.3346	NM_003568	ENSG00000143412	ANXA9	ANX31	annexin A9	protein-coding	3.37	11.36	13.33	2.05667	4.265	3.51
Merged-chr1-150973052-4	chr1	150972839	150973207	FALSE	FALSE	TRUE	exon (NM_001319998, exon 6 of 11)	exon (NM_001319998, exon 6 of 11)	6250	NM_001163260	55793	Hs.743952	NM_018379	ENSG00000143409	MINDY1	FAM63A|MINDY-1	MINDY lysine 48 deubiquitinase 1	protein-coding	3.63	7.69	9.385	1.21333	0.39	2
Merged-chr1-151138503-3	chr1	151138306	151138704	FALSE	TRUE	FALSE	promoter-TSS (NR_037937)	promoter-TSS (NR_037937)	7	NM_024041	79005	Hs.732060	NM_024041	ENSG00000163156	SCNM1	-	sodium channel modifier 1	protein-coding	7.4	24.3267	8.205	5.6	4.845	3.51
Merged-chr1-151284347-5	chr1	151284062	151284601	FALSE	TRUE	TRUE	intron (NM_002651, intron 3 of 12)	intron (NM_002651, intron 3 of 12)	15860	NM_001198775	5298	Hs.632465	NM_002651	ENSG00000143393	PI4KB	NPIK|PI4K-BETA|PI4K92|PI4KBETA|PI4KIIIBETA|PIK4CB	phosphatidylinositol 4-kinase beta	protein-coding	3.225	42.2333	22.505	7.7	3.875	8.52
Merged-chr1-151328883-3	chr1	151328759	151329004	FALSE	FALSE	TRUE	Intergenic	AluSz|SINE|Alu	-9112	NM_000449	5993	Hs.632472	NM_000449	ENSG00000143390	RFX5	-	regulatory factor X5	protein-coding	0.81	4.37	5.85	1.51	0.775	1
Merged-chr1-151584017-3	chr1	151583843	151584211	FALSE	TRUE	FALSE	promoter-TSS (NM_001330723)	promoter-TSS (NM_001330723)	-635	NM_001330723	81609	Hs.192326	NM_030918	ENSG00000143376	SNX27	MRT1|MY014	sorting nexin family member 27	protein-coding	2.275	16.6567	9.025	4.27	2.715	2.51
Merged-chr1-152001855-5	chr1	152001660	152002053	FALSE	TRUE	TRUE	Intergenic	Intergenic	7655	NM_005620	6282	Hs.417004	NM_005620	ENSG00000163191	S100A11	HEL-S-43|MLN70|S100C	S100 calcium binding protein A11	protein-coding	2.015	15.89	13.665	0.27	0.97	1
Merged-chr1-152135403-4	chr1	152135184	152135627	FALSE	TRUE	FALSE	Intergenic	Intergenic	-3701	NM_001122965	126638	Hs.376144	NM_152364	ENSG00000215853	RPTN	-	repetin	protein-coding	1.835	15.5533	11.105	2.75667	2.135	2.51
Merged-chr1-153963208-4	chr1	153962953	153963441	FALSE	FALSE	TRUE	promoter-TSS (NM_001349947)	promoter-TSS (NM_001349947)	-34	NM_001349946	6232	Hs.546291	NM_001030	ENSG00000177954	RPS27	DBA17|MPS-1|MPS1|S27	ribosomal protein S27	protein-coding	6.19	19.2	19.13	4.55	6.205	3.01
Merged-chr1-154245415-5	chr1	154245220	154245637	FALSE	TRUE	TRUE	intron (NM_001018837, intron 1 of 6)	intron (NM_001018837, intron 1 of 6)	389	NM_001018837	10456	Hs.199625	NM_006118	ENSG00000143575	HAX1	HCLSBP1|HS1BP1|SCN3	HCLS1 associated protein X-1	protein-coding	6.04	21.6467	23.3	2.89	1.94	2.51
Merged-chr1-154306794-7	chr1	154306287	154307474	FALSE	TRUE	TRUE	intron (NM_001005855, intron 10 of 11)	intron (NM_001005855, intron 10 of 11)	6604	NM_020452	57198	Hs.435700	NM_020452	ENSG00000143515	ATP8B2	ATPID	ATPase phospholipid transporting 8B2	protein-coding	11.125	64.04	39.78	10.2533	10.47	12.53
Merged-chr1-154599726-4	chr1	154599546	154599960	FALSE	FALSE	TRUE	intron (NM_001025107, intron 1 of 14)	intron (NM_001025107, intron 1 of 14)	703	NM_001025107	103	Hs.12341	NM_001111	ENSG00000160710	ADAR	ADAR1|AGS6|DRADA|DSH|DSRAD|G1P1|IFI-4|IFI4|K88DSRBP|P136	adenosine deaminase, RNA specific	protein-coding	3.33	17.62	16.115	4.52	3.685	5.51
Merged-chr1-154948494-4	chr1	154948258	154948748	FALSE	FALSE	TRUE	TTS (NR_036212)	TTS (NR_036212)	334	NR_036212	100423020		NR_036212	ENSG00000264349	MIR4258	-	microRNA 4258	ncRNA	4.355	14.7533	19.74	4.37333	4.07	2.51
Merged-chr1-154959975-4	chr1	154959807	154960148	FALSE	FALSE	TRUE	5' UTR (NM_001184892, exon 3 of 3)	5' UTR (NM_001184892, exon 3 of 3)	4207	NM_001184892	80308	Hs.118666	NM_025207	ENSG00000160688	FLAD1	FAD1|FADS|LSMFLAD|PP591	flavin adenine dinucleotide synthetase 1	protein-coding	1.795	11.0033	11.88	1.93333	1.745	2.51
Merged-chr1-154977144-5	chr1	154976822	154977395	FALSE	TRUE	TRUE	intron (NM_001256455, intron 1 of 2)	intron (NM_001256455, intron 1 of 2)	2002	NM_001252406	51043	Hs.729279	NM_001252406	ENSG00000160685	ZBTB7B	CKROX|THPOK|ZBTB15|ZFP-67|ZFP67|ZNF857B|c-KROX|hcKROX	zinc finger and BTB domain containing 7B	protein-coding	3.965	19.9833	12.53	3.27	2.325	3.51
Merged-chr1-155021084-4	chr1	155020894	155021244	FALSE	FALSE	TRUE	intron (NM_001143687, intron 15 of 15)	AluSx|SINE|Alu	2572	NR_040772	100505666	Hs.657533	NR_040772		DCST1-AS1	-	DCST1 antisense RNA 1	ncRNA	3.62	15.3833	12.49	1.63	1.55	1
Merged-chr1-155469336-3	chr1	155469150	155469512	FALSE	TRUE	FALSE	intron (NM_018489, intron 2 of 27)	intron (NM_018489, intron 2 of 27)	-62502	NR_147963	645676	Hs.568693	NR_027023	ENSG00000235919	ASH1L-AS1	-	ASH1L antisense RNA 1	ncRNA	1.76	13.6933	9.45	3.41667	1.745	5.01
Merged-chr1-155910874-4	chr1	155910686	155911116	FALSE	FALSE	TRUE	promoter-TSS (NM_181885)	promoter-TSS (NM_181885)	-579	NM_181885	339403	Hs.449914	NM_181885	ENSG00000173080	RXFP4	GPCR142|GPR100|RLN3R2|RXFPR4	relaxin family peptide/INSL5 receptor 4	protein-coding	5.36	18.5167	17.905	4.26	2.135	4.01
Merged-chr1-155953468-5	chr1	155953207	155953800	FALSE	TRUE	TRUE	Intergenic	Intergenic	-4152	NM_001350112	9181	Hs.743352	NM_004723	ENSG00000116584	ARHGEF2	GEF|GEF-H1|GEFH1|LFP40|NEDMHM|P40	Rho/Rac guanine nucleotide exchange factor 2	protein-coding	4.585	48.3533	23.575	6.69333	3.875	5.01
Merged-chr1-155961106-3	chr1	155960930	155961377	FALSE	TRUE	FALSE	Intergenic	MIR3|SINE|MIR	-11802	NM_001350112	9181	Hs.743352	NM_004723	ENSG00000116584	ARHGEF2	GEF|GEF-H1|GEFH1|LFP40|NEDMHM|P40	Rho/Rac guanine nucleotide exchange factor 2	protein-coding	4.17	40.6333	6.955	7.15333	3.1	5.01
Merged-chr1-155962177-5	chr1	155962048	155962341	FALSE	TRUE	TRUE	Intergenic	AluY|SINE|Alu	-12843	NM_001350112	9181	Hs.743352	NM_004723	ENSG00000116584	ARHGEF2	GEF|GEF-H1|GEFH1|LFP40|NEDMHM|P40	Rho/Rac guanine nucleotide exchange factor 2	protein-coding	2.09	11.6	7.12	0.96	2.52	1
Merged-chr1-156156346-5	chr1	156155987	156156727	FALSE	TRUE	TRUE	Intergenic	HERVK22-int|LTR|ERVK	-7366	NR_104411	9673	Hs.532375	NM_014655	ENSG00000160785	SLC25A44	-	solute carrier family 25 member 44	protein-coding	7.675	61.4067	33.07	4.51667	5.815	5.51
Merged-chr1-156441632-3	chr1	156441458	156441797	FALSE	TRUE	FALSE	intron (NM_001271629, intron 8 of 10)	MER124|DNA?|DNA?	18764	NM_001271629	4209	Hs.314327	NM_005920	ENSG00000116604	MEF2D	-	myocyte enhancer factor 2D	protein-coding	4.29	18.1933	3.47	4.12	2.135	4.51
Merged-chr1-156522886-5	chr1	156522706	156523122	FALSE	TRUE	TRUE	intron (NM_178229, intron 13 of 37)	AluJb|SINE|Alu	19482	NM_178229	128239	Hs.591495	NM_178229	ENSG00000183856	IQGAP3	-	IQ motif containing GTPase activating protein 3	protein-coding	3.33	24.2033	14.3	3.02	0.775	2.51
Merged-chr1-156578226-5	chr1	156577897	156578534	FALSE	TRUE	TRUE	Intergenic	Intergenic	-6936	NM_015590	54865	Hs.193832	NM_015590	ENSG00000160818	GPATCH4	GPATC4	G-patch domain containing 4	protein-coding	3.985	49.37	32.705	5.06333	5.425	3.51
Merged-chr1-159252063-5	chr1	159251857	159252266	FALSE	TRUE	TRUE	Intergenic	Intergenic	-7443	NM_002001	2205	Hs.897	NM_002001	ENSG00000179639	FCER1A	FCE1A|FcERI	Fc fragment of IgE receptor Ia	protein-coding	2.56	62.72	24.595	4.24667	1.16	2
Merged-chr1-160078799-5	chr1	160078487	160079174	FALSE	TRUE	TRUE	Intergenic	L2b|LINE|L2	-6690	NM_000702	477	Hs.34114	NM_000702	ENSG00000018625	ATP1A2	FHM2|MHP2	ATPase Na+/K+ transporting subunit alpha 2	protein-coding	5.395	31.0833	24.345	4.37333	3.49	3.01
Merged-chr1-160332153-5	chr1	160331903	160332395	FALSE	TRUE	TRUE	Intergenic	Intergenic	-4712	NM_005598	4807	Hs.30956	NM_005598	ENSG00000171786	NHLH1	HEN1|NSCL|NSCL1|bHLHa35	nescient helix-loop-helix 1	protein-coding	1.87	23.4567	21.44	1.75667	1.745	3.51
Merged-chr1-160520717-4	chr1	160520570	160520936	FALSE	FALSE	TRUE	exon (NM_003874, exon 5 of 7)	exon (NM_003874, exon 5 of 7)	-27701	NM_052931	114836	Hs.492348	NM_052931	ENSG00000162739	SLAMF6	CD352|KALI|KALIb|Ly108|NTB-A|NTBA|SF2000	SLAM family member 6	protein-coding	1.395	9.47333	7.295	0.946667	1.36	0
Merged-chr1-161003749-5	chr1	161003542	161003931	FALSE	TRUE	TRUE	Intergenic	AluJr|SINE|Alu	5038	NM_001113205	100131187	Hs.720030	NM_001113205	ENSG00000215845	TSTD1	KAT|TST	thiosulfate sulfurtransferase like domain containing 1	protein-coding	2.89	14.57	9.43	2.58667	1.165	2
Merged-chr1-161053312-3	chr1	161053115	161053548	FALSE	TRUE	FALSE	intron (NM_030916, intron 1 of 8)	intron (NM_030916, intron 1 of 8)	6054	NM_030916	81607	Hs.492490	NM_030916	ENSG00000143217	NECTIN4	EDSS1|LNIR|PRR4|PVRL4|nectin-4	nectin cell adhesion molecule 4	protein-coding	1.465	13.24	4.285	4.26333	2.135	3.51
Merged-chr1-161085131-5	chr1	161084839	161085407	FALSE	TRUE	TRUE	intron (NM_012394, intron 1 of 3)	AluSx1|SINE|Alu	-2739	NM_001185092	4817	Hs.146406	NM_005600	ENSG00000158793	NIT1	-	nitrilase 1	protein-coding	2.535	42.7733	18.34	4.51667	2.325	3.01
Merged-chr1-161194519-10	chr1	161194035	161195040	TRUE	TRUE	TRUE	Intergenic	AluSp|SINE|Alu	-1119	NM_001643	336	Hs.237658	NM_001643	ENSG00000158874	APOA2	Apo-AII|ApoA-II|apoAII	apolipoprotein A2	protein-coding	24.775	67.36	31.075	9.44333	9.305	11.03
Merged-chr1-161713060-5	chr1	161712676	161713486	FALSE	TRUE	TRUE	Intergenic	MER77|LTR|ERVL	-6477	NM_007240	11266	Hs.416216	NM_007240	ENSG00000081721	DUSP12	DUSP1|YVH1	dual specificity phosphatase 12	protein-coding	3.295	72.52	29.42	5.34	2.905	3.01
Merged-chr1-161735070-5	chr1	161734755	161735295	FALSE	TRUE	TRUE	Intergenic	Intergenic	-1009	NM_007348	22926	Hs.492740	NM_007348	ENSG00000118217	ATF6	ACHM7|ATF6A	activating transcription factor 6	protein-coding	4.98	32.4567	22.985	6.02	4.265	7.52
Merged-chr1-161884926-4	chr1	161884802	161885081	FALSE	TRUE	FALSE	intron (NM_007348, intron 15 of 15)	L2a|LINE|L2	109314	NM_001297713	25903	Hs.507515	NM_015441	ENSG00000162745	OLFML2B	-	olfactomedin like 2B	protein-coding	2.755	12.3333	7.955	2.05333	1.36	1
Merged-chr1-162115008-6	chr1	162114582	162115466	TRUE	TRUE	TRUE	intron (NM_014697, intron 1 of 9)	intron (NM_014697, intron 1 of 9)	-11873	NR_039798	100616386		NR_039798	ENSG00000266144	MIR4654	mir-4654	microRNA 4654	ncRNA	21.72	97.86	64.85	9.22667	8.34	9.02
Merged-chr1-162205193-4	chr1	162204898	162205511	FALSE	TRUE	FALSE	intron (NM_014697, intron 2 of 9)	intron (NM_014697, intron 2 of 9)	78307	NR_039798	100616386		NR_039798	ENSG00000266144	MIR4654	mir-4654	microRNA 4654	ncRNA	6.145	43.8333	15.795	6.96333	5.62	7.02
Merged-chr1-162602286-5	chr1	162602110	162602431	FALSE	TRUE	TRUE	promoter-TSS (NM_006182)	promoter-TSS (NM_006182)	99	NM_001014796	4921	Hs.275757	NM_006182	ENSG00000162733	DDR2	MIG20a|NTRKR3|TKT|TYRO10	discoidin domain receptor tyrosine kinase 2	protein-coding	3.77	12.8067	12.51	1.5	2.325	2
Merged-chr1-163514397-4	chr1	163514186	163514626	FALSE	TRUE	FALSE	Intergenic	Tigger3b|DNA|TcMar-Tigger	-121425	NR_104294	100422212	Hs.556898	NR_104294		LOC100422212	-	eukaryotic translation initiation factor 3 subunit J pseudogene	pseudo	2.57	17.7233	7.12	2.6	1.745	1.5
Merged-chr1-165107281-6	chr1	165107104	165107474	TRUE	TRUE	TRUE	Intergenic	Intergenic	218189	NM_001174069	4009	Hs.667312	NM_177398	ENSG00000162761	LMX1A	LMX1|LMX1.1	LIM homeobox transcription factor 1 alpha	protein-coding	11.525	29.9733	11.445	2.73333	3.295	1
Merged-chr1-165694530-3	chr1	165694332	165694691	FALSE	TRUE	FALSE	non-coding (NR_045818, exon 7 of 7)	non-coding (NR_045818, exon 7 of 7)	26524	NR_036683	440700	Hs.568703	NR_036683	ENSG00000215838	LOC440700	-	carbonic anhydrase 14 pseudogene	pseudo	1.395	15.4833	7.615	2.46667	1.36	3.51
Merged-chr1-167416892-3	chr1	167416751	167417068	FALSE	TRUE	FALSE	intron (NM_000734, intron 1 of 7)	intron (NM_000734, intron 1 of 7)	70938	NM_198053	919	Hs.156445	NM_000734	ENSG00000198821	CD247	CD3-ZETA|CD3H|CD3Q|CD3Z|IMD25|T3Z|TCRZ	CD247 molecule	protein-coding	0.81	14.7367	5.19	1.79667	1.165	2
Merged-chr1-167533970-4	chr1	167533683	167534239	FALSE	FALSE	TRUE	Intergenic	Intergenic	-10905	NM_003851	8804	Hs.5710	NM_003851	ENSG00000143162	CREG1	CREG	cellular repressor of E1A stimulated genes 1	protein-coding	1.73	12.3967	11.765	1.78667	1.935	2
Merged-chr1-168152389-4	chr1	168152169	168152594	FALSE	FALSE	TRUE	intron (NM_001031800, intron 1 of 4)	L1ME4a|LINE|L1	4298	NM_001031800	261726	Hs.209431	NM_152902	ENSG00000143155	TIPRL	TIP|TIP41|TIPRL1	TOR signaling pathway regulator	protein-coding	1.43	12.8967	12.445	2.21333	2.135	1
Merged-chr1-168172518-3	chr1	168172149	168172797	FALSE	TRUE	FALSE	Intergenic	L1MCc|LINE|L1	-22782	NM_199344	375035	Hs.645435	NM_199344	ENSG00000213064	SFT2D2	UNQ512|dJ747L4.C1.2	SFT2 domain containing 2	protein-coding	6.895	22.2467	10.47	4.80333	2.715	8.02
Merged-chr1-168308317-4	chr1	168308165	168308456	FALSE	FALSE	TRUE	Intergenic	MER34B-int|LTR|ERV1	-36452	NR_030284	693142		NR_030284	ENSG00000207974	MIR557	MIRN557|hsa-mir-557	microRNA 557	ncRNA	1.325	7.80667	8.005	0.82	2.33	1
Merged-chr1-168521030-3	chr1	168520903	168521144	FALSE	TRUE	FALSE	Intergenic	Intergenic	-7788	NM_003175	6846	Hs.458346	NM_003175	ENSG00000143185	XCL2	SCM-1b|SCM1B|SCYC2	X-C motif chemokine ligand 2	protein-coding	1.36	11.27	5.12	2.36	1.745	3.51
Merged-chr1-168688743-3	chr1	168688591	168688875	FALSE	TRUE	FALSE	intron (NM_001937, intron 1 of 3)	intron (NM_001937, intron 1 of 3)	9709	NM_001937	1805	Hs.80552	NM_001937	ENSG00000143196	DPT	TRAMP	dermatopontin	protein-coding	1.835	17.3067	5.12	3.02667	1.165	4.01
Merged-chr1-168780685-5	chr1	168780383	168781047	FALSE	TRUE	TRUE	Intergenic	Intergenic	24536	NR_024160	79100	Hs.250624	NR_024160	ENSG00000225826	LINC00626	-	long intergenic non-protein coding RNA 626	ncRNA	5.5	48.5267	26.335	4.69	2.715	4.51
Merged-chr1-169058014-5	chr1	169057757	169058334	FALSE	TRUE	TRUE	Intergenic	Intergenic	-1802	NR_104091	101978719	Hs.517849	NR_104091	ENSG00000203601	LINC00970	-	long intergenic non-protein coding RNA 970	ncRNA	3.49	24.3267	13.805	4.26667	4.65	3.51
Merged-chr1-169137388-3	chr1	169137212	169137565	FALSE	TRUE	FALSE	intron (NM_013330, intron 11 of 11)	MER50|LTR|ERV1	61441	NM_001677	481	Hs.291196	NM_001677	ENSG00000143153	ATP1B1	ATP1B	ATPase Na+/K+ transporting subunit beta 1	protein-coding	1.575	9.18333	4.895	1.23333	1.745	1.5
Merged-chr1-169256752-4	chr1	169256593	169256907	FALSE	TRUE	FALSE	intron (NM_013330, intron 6 of 11)	intron (NM_013330, intron 6 of 11)	-80367	NM_001320973	8548	Hs.130746	NM_003666	ENSG00000117475	BLZF1	GOLGIN-45|JEM-1|JEM-1s|JEM1	basic leucine zipper nuclear factor 1	protein-coding	2.605	14.3033	8.655	1.11	2.325	2
Merged-chr1-169317691-4	chr1	169317524	169317875	FALSE	FALSE	TRUE	intron (NM_013330, intron 1 of 11)	intron (NM_013330, intron 1 of 11)	-19418	NM_001320973	8548	Hs.130746	NM_003666	ENSG00000117475	BLZF1	GOLGIN-45|JEM-1|JEM-1s|JEM1	basic leucine zipper nuclear factor 1	protein-coding	2.305	17.6567	17.36	2.58	3.88	2
Merged-chr1-170517828-5	chr1	170517489	170518218	FALSE	TRUE	TRUE	intron (NM_001320252, intron 6 of 6)	Looper|DNA|PiggyBac	-16103	NR_125958	101928650	Hs.676662	NR_125958		LOC101928650	-	uncharacterized LOC101928650	ncRNA	5.72	29.45	35.34	1.93667	2.91	4.01
Merged-chr1-171130129-4	chr1	171129805	171130382	FALSE	TRUE	FALSE	intron (NR_002601, intron 6 of 6)	intron (NR_002601, intron 6 of 6)	23214	NR_002601	388714	Hs.448988	NR_002601	ENSG00000117507	FMO6P	FMO6	flavin containing monooxygenase 6 pseudogene	pseudo	4.695	29.3467	14.98	4.38333	2.71	2
Merged-chr1-172429575-5	chr1	172429148	172429978	FALSE	TRUE	TRUE	intron (NM_001300760, intron 2 of 4)	intron (NM_001300760, intron 2 of 4)	7530	NM_001300760	92346	Hs.517991	NM_139240	ENSG00000180999	C1orf105	-	chromosome 1 open reading frame 105	protein-coding	5.57	43.28	24.57	7.23	6.98	3.01
Merged-chr1-172439036-5	chr1	172438836	172439259	FALSE	TRUE	TRUE	Intergenic	Intergenic	17014	NM_001300760	92346	Hs.517991	NM_139240	ENSG00000180999	C1orf105	-	chromosome 1 open reading frame 105	protein-coding	3.225	23.0567	14.19	4.53333	3.49	4.01
Merged-chr1-172871556-2	chr1	172871378	172871679	FALSE	FALSE	TRUE	Intergenic	Intergenic	148575	NM_005092	8995	Hs.248197	NM_005092	ENSG00000120337	TNFSF18	AITRL|GITRL|TL6|TNLG2A|hGITRL	TNF superfamily member 18	protein-coding	1.575	4.93667	10.245	1.51333	1.355	0.5
Merged-chr1-172945448-5	chr1	172945219	172945677	FALSE	TRUE	TRUE	Intergenic	Intergenic	74655	NM_005092	8995	Hs.248197	NM_005092	ENSG00000120337	TNFSF18	AITRL|GITRL|TL6|TNLG2A|hGITRL	TNF superfamily member 18	protein-coding	4.9	18.8067	19.835	2.87667	3.105	2
Merged-chr1-172972464-4	chr1	172972218	172972644	FALSE	FALSE	TRUE	Intergenic	AluJb|SINE|Alu	47672	NM_005092	8995	Hs.248197	NM_005092	ENSG00000120337	TNFSF18	AITRL|GITRL|TL6|TNLG2A|hGITRL	TNF superfamily member 18	protein-coding	1.36	12.4667	8.795	1.5	2.715	1
Merged-chr1-173238878-5	chr1	173238632	173239213	FALSE	TRUE	TRUE	intron (NR_037845, intron 2 of 2)	Tigger7|DNA|TcMar-Tigger	-62470	NM_003326	7292	Hs.181097	NM_003326	ENSG00000117586	TNFSF4	CD134L|CD252|GP34|OX-40L|OX4OL|TNLG2B|TXGP1	TNF superfamily member 4	protein-coding	1.835	30.3967	19.945	2.18333	2.715	4.01
Merged-chr1-173929753-4	chr1	173929545	173929988	FALSE	FALSE	TRUE	intron (NM_172071, intron 12 of 18)	L1M5|LINE|L1	32444	NM_001300852	149041	Hs.30258	NM_172071	ENSG00000135870	RC3H1	RNF198|ROQUIN	ring finger and CCCH-type domains 1	protein-coding	2.235	11.7433	10.765	2.60667	1.935	1
Merged-chr1-174277940-5	chr1	174277786	174278080	FALSE	TRUE	TRUE	intron (NM_014857, intron 11 of 20)	L1MB5|LINE|L1	-139279	NM_005684	9293	Hs.673850	NM_005684	ENSG00000203737	GPR52	-	G protein-coupled receptor 52	protein-coding	0.995	13.2633	9.93	2.60333	1.555	1
Merged-chr1-174569564-4	chr1	174569362	174569820	FALSE	TRUE	FALSE	intron (NM_014857, intron 13 of 20)	THE1A-int|LTR|ERVL-MaLR	152379	NM_005684	9293	Hs.673850	NM_005684	ENSG00000203737	GPR52	-	G protein-coupled receptor 52	protein-coding	3.075	13.0267	7.84	2.32333	1.355	3.01
Merged-chr1-174689876-4	chr1	174689666	174690052	FALSE	FALSE	TRUE	intron (NM_014857, intron 17 of 20)	L1MB7|LINE|L1	-79176	NM_001330989	9910	Hs.585378	NM_014857	ENSG00000152061	RABGAP1L	HHL|TBC1D18	RAB GTPase activating protein 1 like	protein-coding	2.57	8.38333	10.065	1.63	1.165	1
Merged-chr1-174971372-4	chr1	174971153	174971636	FALSE	FALSE	TRUE	intron (NM_014412, intron 1 of 5)	L1MB7|LINE|L1	2502	NM_014412	27101	Hs.508524	NM_014412	ENSG00000116161	CACYBP	GIG5|PNAS-107|S100A6BP|SIP	calcyclin binding protein	protein-coding	3.33	18.1067	22.05	3.56	3.88	1
Merged-chr1-176147513-5	chr1	176147126	176147759	FALSE	TRUE	TRUE	intron (NM_001001740, intron 2 of 18)	AluSz6|SINE|Alu	28938	NM_001001740	64326	Hs.523744	NM_022457	ENSG00000143207	COP1	RFWD2|RNF200	COP1, E3 ubiquitin ligase	protein-coding	7.07	34.6733	27.52	3.41	3.105	3.01
Merged-chr1-176210888-5	chr1	176210543	176211365	FALSE	TRUE	TRUE	Intergenic	L1MCa|LINE|L1	-34574	NM_022457	64326	Hs.523744	NM_022457	ENSG00000143207	COP1	RFWD2|RNF200	COP1, E3 ubiquitin ligase	protein-coding	4.91	88.0667	60.495	5.75	3.685	4.51
Merged-chr1-176484724-4	chr1	176484554	176484946	FALSE	TRUE	FALSE	intron (NM_021936, intron 1 of 4)	intron (NM_021936, intron 1 of 4)	52443	NM_021936	60676	Hs.187284	NM_020318	ENSG00000116183	PAPPA2	PAPP-A2|PAPP-E|PAPPE|PLAC3	pappalysin 2	protein-coding	1.245	20.1333	6.985	1.79333	1.745	1.5
Merged-chr1-176486777-5	chr1	176486621	176487017	FALSE	TRUE	TRUE	intron (NM_021936, intron 1 of 4)	intron (NM_021936, intron 1 of 4)	54512	NM_021936	60676	Hs.187284	NM_020318	ENSG00000116183	PAPPA2	PAPP-A2|PAPP-E|PAPPE|PLAC3	pappalysin 2	protein-coding	1.06	16.37	8.365	1.92333	1.55	2.51
Merged-chr1-178315184-4	chr1	178314980	178315504	FALSE	FALSE	TRUE	intron (NM_004841, intron 1 of 15)	intron (NM_004841, intron 1 of 15)	4636	NM_004841	9462	Hs.496139	NM_004841	ENSG00000075391	RASAL2	NGAP	RAS protein activator like 2	protein-coding	2.57	20.05	15.32	3.67667	2.52	4.51
Merged-chr1-178499174-4	chr1	178498981	178499384	FALSE	TRUE	FALSE	Intergenic	Intergenic	-12749	NR_033186	400798	Hs.668085	NM_207467	ENSG00000213057	C1orf220	-	chromosome 1 open reading frame 220 (putative)	ncRNA	4.91	23.3933	9.88	5.2	3.295	1.5
Merged-chr1-178506932-5	chr1	178506704	178507190	FALSE	TRUE	TRUE	Intergenic	Intergenic	-4984	NR_033186	400798	Hs.668085	NM_207467	ENSG00000213057	C1orf220	-	chromosome 1 open reading frame 220 (putative)	ncRNA	5.315	32.63	20.72	4.53	2.325	6.52
Merged-chr1-178599658-5	chr1	178599373	178599881	FALSE	TRUE	TRUE	Intergenic	Intergenic	-47257	NR_039622	100616328		NR_039622	ENSG00000266417	MIR4424	-	microRNA 4424	ncRNA	2.275	39.8433	17.635	3	3.485	4.01
Merged-chr1-178625013-3	chr1	178624833	178625205	FALSE	TRUE	FALSE	Intergenic	Intergenic	-21865	NR_039622	100616328		NR_039622	ENSG00000266417	MIR4424	-	microRNA 4424	ncRNA	1.87	17.0967	5.85	2.06667	2.135	1.5
Merged-chr1-178888987-3	chr1	178888856	178889145	FALSE	TRUE	FALSE	3' UTR (NM_152663, exon 20 of 20)	3' UTR (NM_152663, exon 20 of 20)	-48785	NM_004673	9068	Hs.591474	NM_004673	ENSG00000116194	ANGPTL1	ANG3|ANGPT3|ARP1|AngY|UNQ162|dJ595C2.2	angiopoietin like 1	protein-coding	1.325	10.3267	4.35	1.49333	2.325	2.51
Merged-chr1-178969521-4	chr1	178969399	178969649	FALSE	FALSE	TRUE	Intergenic	AluSc|SINE|Alu	-25415	NM_001324310	9917	Hs.5737	NM_014864	ENSG00000116199	FAM20B	gxk1	FAM20B, glycosaminoglycan xylosylkinase	protein-coding	2.815	9.03333	9.565	1.91	0.775	1
Merged-chr1-179060964-6	chr1	179060578	179061297	TRUE	TRUE	TRUE	intron (NM_022371, intron 4 of 5)	intron (NM_022371, intron 4 of 5)	9825	NM_022371	64222	Hs.584957	NM_022371	ENSG00000186283	TOR3A	ADIR|ADIR2	torsin family 3 member A	protein-coding	16.68	63.1433	39.325	4.78333	4.46	5.51
Merged-chr1-179335240-5	chr1	179334872	179335666	FALSE	TRUE	TRUE	intron (NR_073544, intron 1 of 25)	CpG	162	NR_073544	126859	Hs.658505	NM_144696	ENSG00000162779	AXDND1	C1orf125	axonemal dynein light chain domain containing 1	protein-coding	11.24	111.037	62.83	8.65667	6.205	8.52
Merged-chr1-179520204-5	chr1	179519921	179520705	FALSE	TRUE	TRUE	exon (NM_001297575, exon 7 of 7)	exon (NM_001297575, exon 7 of 7)	24774	NM_014625	7827	Hs.412710	NM_014625	ENSG00000116218	NPHS2	PDCN|SRN1	NPHS2, podocin	protein-coding	3.7	39.8133	18.495	4.66	2.325	5.51
Merged-chr1-179701025-4	chr1	179700773	179701283	FALSE	TRUE	FALSE	intron (NM_001329716, intron 1 of 6)	intron (NM_001329716, intron 1 of 6)	1702	NR_138090	148753	Hs.400696	NM_173509	ENSG00000143340	FAM163A	C1orf76|NDSP	family with sequence similarity 163 member A	protein-coding	2.235	14.3833	10.065	1.64667	1.355	3.51
Merged-chr1-179960181-5	chr1	179959918	179960458	FALSE	TRUE	TRUE	intron (NM_014810, intron 4 of 37)	intron (NM_014810, intron 4 of 37)	36280	NM_014810	9857	Hs.413045	NM_014810	ENSG00000135837	CEP350	CAP350|GM133	centrosomal protein 350	protein-coding	4.22	20.76	21.78	3.45333	3.1	1.5
Merged-chr1-180086139-5	chr1	180085901	180086337	FALSE	TRUE	TRUE	Intergenic	Intergenic	-37849	NM_002826	5768	Hs.744925	NM_002826	ENSG00000116260	QSOX1	Q6|QSCN6	quiescin sulfhydryl oxidase 1	protein-coding	3.445	35.0733	15.55	4.54333	4.845	1.5
Merged-chr1-180092811-5	chr1	180092553	180093091	FALSE	TRUE	TRUE	Intergenic	Intergenic	-31146	NM_002826	5768	Hs.744925	NM_002826	ENSG00000116260	QSOX1	Q6|QSCN6	quiescin sulfhydryl oxidase 1	protein-coding	3.04	40.0333	21.85	4.97333	1.935	2.51
Merged-chr1-180100759-5	chr1	180100463	180101039	FALSE	TRUE	TRUE	Intergenic	L2b|LINE|L2	-23217	NM_002826	5768	Hs.744925	NM_002826	ENSG00000116260	QSOX1	Q6|QSCN6	quiescin sulfhydryl oxidase 1	protein-coding	2.2	41.4467	16.095	2.87	2.905	6.01
Merged-chr1-180472611-4	chr1	180472391	180472826	FALSE	FALSE	TRUE	promoter-TSS (NM_032360)	promoter-TSS (NM_032360)	-586	NM_032360	84320	Hs.200051	NM_032360	ENSG00000230124	ACBD6	-	acyl-CoA binding domain containing 6	protein-coding	4.07	11.7733	9.705	2.75333	3.295	4.01
Merged-chr1-180485398-5	chr1	180485136	180485636	FALSE	TRUE	TRUE	Intergenic	Intergenic	-13364	NM_032360	84320	Hs.200051	NM_032360	ENSG00000230124	ACBD6	-	acyl-CoA binding domain containing 6	protein-coding	4.325	38.9567	21.195	5.75667	5.82	4.51
Merged-chr1-180491029-8	chr1	180490235	180491586	TRUE	TRUE	TRUE	Intergenic	MLT1I|LTR|ERVL-MaLR	-18888	NM_032360	84320	Hs.200051	NM_032360	ENSG00000230124	ACBD6	-	acyl-CoA binding domain containing 6	protein-coding	24.865	156.687	65.78	10.1833	11.05	10.02
Merged-chr1-180623818-4	chr1	180623658	180623989	FALSE	FALSE	TRUE	intron (NR_137330, intron 1 of 12)	L1MB3|LINE|L1	22677	NM_001328662	9213	Hs.227656	NM_004736	ENSG00000143324	XPR1	IBGC6|SLC53A1|SYG1|X3	xenotropic and polytropic retrovirus receptor 1	protein-coding	1.615	9.02	8.385	1.79333	1.55	4.01
Merged-chr1-180971833-4	chr1	180971588	180972049	FALSE	TRUE	FALSE	exon (NM_005819, exon 3 of 8)	exon (NM_005819, exon 3 of 8)	20439	NM_005819	10228	Hs.518417	NM_005819	ENSG00000135823	STX6	-	syntaxin 6	protein-coding	4.845	19	7.14	1.63667	2.52	5.01
Merged-chr1-181012209-6	chr1	181011846	181012571	TRUE	TRUE	TRUE	intron (NM_001310213, intron 3 of 6)	intron (NM_001310213, intron 3 of 6)	9647	NM_001194999	3140	Hs.13500	NM_001531	ENSG00000153029	MR1	HLALS	major histocompatibility complex, class I-related	protein-coding	9.96	47.5967	37.31	6.44	4.265	6.01
Merged-chr1-181224888-5	chr1	181224677	181225167	FALSE	TRUE	TRUE	Intergenic	LTR33|LTR|ERVL	19398	NR_046249	100287948	Hs.742594	NR_046249	ENSG00000179452	LINC01699	GM140	long intergenic non-protein coding RNA 1699	ncRNA	2.2	14.71	12.26	2.19667	2.13	4.01
Merged-chr1-182269381-5	chr1	182269175	182269642	FALSE	TRUE	TRUE	intron (NR_104175, intron 2 of 2)	intron (NR_104175, intron 2 of 2)	13788	NR_104175	400799	Hs.634884	NR_104175	ENSG00000228918	LINC01344	GS1-122H1.2	long intergenic non-protein coding RNA 1344	ncRNA	4.51	24.5333	14.37	2.61333	2.905	2
Merged-chr1-182271012-5	chr1	182270549	182271518	FALSE	TRUE	TRUE	intron (NR_104175, intron 2 of 2)	intron (NR_104175, intron 2 of 2)	12163	NR_104175	400799	Hs.634884	NR_104175	ENSG00000228918	LINC01344	GS1-122H1.2	long intergenic non-protein coding RNA 1344	ncRNA	10.075	77.9133	41.82	7.35667	7.755	8.52
Merged-chr1-182429875-5	chr1	182429575	182430142	FALSE	TRUE	TRUE	intron (NM_001137669, intron 4 of 21)	L1PA4|LINE|L1	10602	NM_001137669	353299	Hs.121200	NM_032267	ENSG00000121446	RGSL1	RGSL|RGSL2	regulator of G protein signaling like 1	protein-coding	3.63	36.02	18.68	3.54333	1.94	3.01
Merged-chr1-182686685-4	chr1	182686358	182687073	FALSE	TRUE	FALSE	Intergenic	L2a|LINE|L2	4718	NR_146548	105371644	Hs.496952	NR_146548	ENSG00000227181	LINC01688	-	long intergenic non-protein coding RNA 1688	ncRNA	2.855	31.1133	13.485	5.18667	1.745	2
Merged-chr1-182995117-4	chr1	182994897	182995401	FALSE	TRUE	FALSE	intron (NM_002293, intron 1 of 27)	intron (NM_002293, intron 1 of 27)	2554	NM_002293	3915	Hs.609663	NM_002293	ENSG00000135862	LAMC1	LAMB2	laminin subunit gamma 1	protein-coding	2.72	26.7033	15.025	5.78333	4.265	2.51
Merged-chr1-183484262-5	chr1	183483993	183484543	FALSE	TRUE	TRUE	intron (NM_001350221, intron 4 of 24)	intron (NM_001350221, intron 4 of 24)	42762	NM_173156	9887	Hs.591463	NM_014837	ENSG00000116698	SMG7	C1orf16|EST1C|SGA56M	SMG7, nonsense mediated mRNA decay factor	protein-coding	2.235	35.0367	12.125	3.95667	3.105	2
Merged-chr1-183569490-5	chr1	183569254	183569794	FALSE	TRUE	TRUE	Intergenic	Intergenic	-9468	NM_001127651	4688	Hs.587558	NM_000433	ENSG00000116701	NCF2	NCF-2|NOXA2|P67-PHOX|P67PHOX	neutrophil cytosolic factor 2	protein-coding	2.055	34.08	15.525	4.23667	1.94	7.02
Merged-chr1-183577709-5	chr1	183577483	183578089	FALSE	TRUE	TRUE	Intergenic	MER44B|DNA|TcMar-Tigger	-17730	NM_001127651	4688	Hs.587558	NM_000433	ENSG00000116701	NCF2	NCF-2|NOXA2|P67-PHOX|P67PHOX	neutrophil cytosolic factor 2	protein-coding	3.125	38.51	22.505	4.26	4.07	4.01
Merged-chr1-183592205-3	chr1	183591968	183592561	FALSE	TRUE	FALSE	Intergenic	Intergenic	12812	NM_001270439	10092	Hs.518609	NM_005717	ENSG00000162704	ARPC5	ARC16|dJ127C7.3|p16-Arc	actin related protein 2/3 complex subunit 5	protein-coding	3.01	27.5867	11.785	7.73333	3.875	3.01
Merged-chr1-183605394-3	chr1	183605207	183605584	FALSE	TRUE	FALSE	promoter-TSS (NM_001270439)	promoter-TSS (NM_001270439)	213	NM_001297670	23179	Hs.497148	NM_015149	ENSG00000143344	RGL1	RGL	ral guanine nucleotide dissociation stimulator like 1	protein-coding	3.7	19.47	8.07	4.39667	2.715	3.51
Merged-chr1-183645870-4	chr1	183645665	183646159	FALSE	TRUE	FALSE	intron (NM_001297670, intron 1 of 17)	MIR|SINE|MIR	-23464	NM_203454	403314	Hs.97335	NM_203454	ENSG00000173627	APOBEC4	C1orf169	apolipoprotein B mRNA editing enzyme catalytic polypeptide like 4	protein-coding	4.575	30.8833	13.645	4.25	4.07	6.01
Merged-chr1-183669033-6	chr1	183668503	183669461	TRUE	TRUE	TRUE	intron (NM_001297669, intron 2 of 18)	intron (NM_001297669, intron 2 of 18)	-46534	NM_203454	403314	Hs.97335	NM_203454	ENSG00000173627	APOBEC4	C1orf169	apolipoprotein B mRNA editing enzyme catalytic polypeptide like 4	protein-coding	17.995	67.2733	31.145	11.6533	7.365	8.02
Merged-chr1-183746610-5	chr1	183746266	183746985	FALSE	TRUE	TRUE	intron (NM_001297669, intron 3 of 18)	intron (NM_001297669, intron 3 of 18)	-27590	NM_001297671	23179	Hs.497148	NM_015149	ENSG00000143344	RGL1	RGL	ral guanine nucleotide dissociation stimulator like 1	protein-coding	7.76	63.7567	34.045	7.51333	4.655	5.01
Merged-chr1-183850889-5	chr1	183850678	183851120	FALSE	TRUE	TRUE	intron (NM_001297672, intron 5 of 16)	intron (NM_001297672, intron 5 of 16)	76684	NM_001297672	23179	Hs.497148	NM_015149	ENSG00000143344	RGL1	RGL	ral guanine nucleotide dissociation stimulator like 1	protein-coding	4.39	18.03	15.865	3.57333	1.94	5.51
Merged-chr1-183932544-4	chr1	183932395	183932707	FALSE	FALSE	TRUE	intron (NM_015101, intron 6 of 11)	intron (NM_015101, intron 6 of 11)	74353	NM_001303420	23127	Hs.387995	NM_015101	ENSG00000198756	COLGALT2	C1orf17|ColGalT 2|GLT25D2	collagen beta(1-O)galactosyltransferase 2	protein-coding	0.625	7.23	10.405	1.25	1.16	1
Merged-chr1-183950428-3	chr1	183950286	183950593	FALSE	FALSE	TRUE	intron (NM_001303421, intron 1 of 11)	intron (NM_001303421, intron 1 of 11)	56465	NM_001303420	23127	Hs.387995	NM_015101	ENSG00000198756	COLGALT2	C1orf17|ColGalT 2|GLT25D2	collagen beta(1-O)galactosyltransferase 2	protein-coding	1.5	7.03667	10.88	1.23333	1.555	1
Merged-chr1-184004262-5	chr1	184003999	184004740	FALSE	TRUE	TRUE	intron (NM_001303421, intron 1 of 11)	MIR3|SINE|MIR	2535	NM_001303420	23127	Hs.387995	NM_015101	ENSG00000198756	COLGALT2	C1orf17|ColGalT 2|GLT25D2	collagen beta(1-O)galactosyltransferase 2	protein-coding	7.32	34.5567	22.985	6.02667	4.655	6.01
Merged-chr1-184020661-6	chr1	184020156	184021184	TRUE	TRUE	TRUE	promoter-TSS (NR_023349)	promoter-TSS (NR_023349)	-115	NM_001300766	116461	Hs.548197	NM_052965	ENSG00000198860	TSEN15	C1orf19|PCH2F|sen15	tRNA splicing endonuclease subunit 15	protein-coding	23.49	115.387	70.855	11.0133	10.08	11.03
Merged-chr1-184942883-5	chr1	184942573	184943186	FALSE	TRUE	TRUE	intron (NM_052966, intron 1 of 13)	CpG	839	NM_052966	116496	Hs.518662	NM_052966	ENSG00000135842	FAM129A	C1orf24|GIG39|NIBAN	family with sequence similarity 129 member A	protein-coding	2.385	48.09	26.065	3.17	2.13	5.01
Merged-chr1-184959505-4	chr1	184959298	184959690	FALSE	TRUE	FALSE	Intergenic	Intergenic	-11165	NR_146489	101929069	Hs.497170	NR_146489	ENSG00000260976	LINC01633	GS1-120K12.4	long intergenic non-protein coding RNA 1633	ncRNA	0.405	12.43	8.635	1.78333	0.775	0
Merged-chr1-185207706-5	chr1	185207420	185207891	FALSE	TRUE	TRUE	intron (NM_017673, intron 16 of 18)	MER5A|DNA|hAT-Charlie	78806	NM_006469	10625	Hs.497183	NM_006469	ENSG00000116679	IVNS1ABP	ARA3|FLARA3|HSPC068|KLHL39|ND1|NS-1|NS1-BP|NS1BP	influenza virus NS1A binding protein	protein-coding	3.225	24.83	16.435	2.75	3.295	1
Merged-chr1-187460706-5	chr1	187460135	187461063	FALSE	TRUE	TRUE	Intergenic	MIR|SINE|MIR	47839	NR_132374	106144535	Hs.568709	NR_132374		LINC01037	-	long intergenic non-protein coding RNA 1037	ncRNA	5.28	61.4033	23.07	6.16667	3.685	1
Merged-chr1-189939604-4	chr1	189939261	189939960	FALSE	TRUE	FALSE	Intergenic	Intergenic	505530	NM_001317188	339479	Hs.65765	NM_199051	ENSG00000162670	BRINP3	DBCCR1L|DBCCR1L1|FAM5C	BMP/retinoic acid inducible neural specific 3	protein-coding	2.685	22.5533	8.82	2.86	3.105	2
Merged-chr1-190219681-3	chr1	190219486	190219825	FALSE	FALSE	TRUE	intron (NM_199051, intron 4 of 7)	L3|LINE|CR1	225485	NM_001317188	339479	Hs.65765	NM_199051	ENSG00000162670	BRINP3	DBCCR1L|DBCCR1L1|FAM5C	BMP/retinoic acid inducible neural specific 3	protein-coding	1.5	5.55667	8.975	1.47667	1.36	1.5
Merged-chr1-190345449-5	chr1	190345203	190345679	FALSE	TRUE	TRUE	intron (NM_199051, intron 2 of 7)	intron (NM_199051, intron 2 of 7)	99699	NM_001317188	339479	Hs.65765	NM_199051	ENSG00000162670	BRINP3	DBCCR1L|DBCCR1L1|FAM5C	BMP/retinoic acid inducible neural specific 3	protein-coding	2.42	17.3167	11.88	2.05	2.325	1.5
Merged-chr1-190637313-4	chr1	190637173	190637509	FALSE	TRUE	FALSE	intron (NR_033922, intron 1 of 4)	intron (NR_033922, intron 1 of 4)	43321	NR_033922	440704	Hs.518802	NR_033922	ENSG00000231175	LINC01720	-	long intergenic non-protein coding RNA 1720	ncRNA	2.055	10.0033	7.685	1.79	2.325	1.5
Merged-chr1-190777348-2	chr1	190777206	190777467	FALSE	FALSE	TRUE	Intergenic	Intergenic	183316	NR_033922	440704	Hs.518802	NR_033922	ENSG00000231175	LINC01720	-	long intergenic non-protein coding RNA 1720	ncRNA	0.405	3.02333	8.18	1.09333	1.165	1
Merged-chr1-192455407-5	chr1	192455175	192455569	FALSE	TRUE	TRUE	Intergenic	Intergenic	-89485	NM_002922	5996	Hs.75256	NM_002922	ENSG00000090104	RGS1	1R20|BL34|HEL-S-87|IER1|IR20	regulator of G protein signaling 1	protein-coding	1.575	23.19	12.805	2.9	1.355	4.01
Merged-chr1-192668051-5	chr1	192667782	192668260	FALSE	TRUE	TRUE	Intergenic	AluJb|SINE|Alu	-17437	NR_039624	100616345		NR_039624	ENSG00000283795	MIR4426	-	microRNA 4426	ncRNA	4.105	35.97	18.245	4.38	4.65	1.5
Merged-chr1-192717310-4	chr1	192717104	192717496	FALSE	FALSE	TRUE	Intergenic	Intergenic	31842	NR_039624	100616345		NR_039624	ENSG00000283795	MIR4426	-	microRNA 4426	ncRNA	3.225	11.79	11.2	1.36667	1.745	2.51
Merged-chr1-193028610-4	chr1	193028452	193028750	FALSE	TRUE	FALSE	promoter-TSS (NM_015984)	promoter-TSS (NM_015984)	49	NM_001331020	6738	Hs.288178	NM_004600	ENSG00000116747	TROVE2	RO60|RORNP|SSA2	TROVE domain family member 2	protein-coding	3.985	27.6667	13.105	3.69	4.46	3.51
Merged-chr1-193081095-6	chr1	193080558	193081679	FALSE	TRUE	TRUE	Intergenic	AluJo|SINE|Alu	-5874	NM_016066	51022	Hs.458283	NM_016066	ENSG00000023572	GLRX2	CGI-133|GRX2	glutaredoxin 2	protein-coding	11.975	88.0433	58.935	10.7933	10.08	7.52
Merged-chr1-194267333-5	chr1	194267036	194267613	FALSE	TRUE	TRUE	Intergenic	Intergenic	993449	NR_125789	101929184	Hs.146728	NR_125789	ENSG00000232077	LINC01031	TCONS_00000361	long intergenic non-protein coding RNA 1031	ncRNA	5.065	30.7967	34.455	1.49667	2.52	2.51
Merged-chr1-194743801-4	chr1	194743654	194743950	FALSE	FALSE	TRUE	Intergenic	Intergenic	1314043	NR_146895	105371673		NR_146895		LINC01724	-	long intergenic non-protein coding RNA 1724	ncRNA	1.465	8.88667	10.425	1.37	0.39	0
Merged-chr1-196113218-4	chr1	196113040	196113369	FALSE	FALSE	TRUE	Intergenic	Intergenic	-55359	NR_146895	105371673		NR_146895		LINC01724	-	long intergenic non-protein coding RNA 1724	ncRNA	2.2	8.71333	8.615	0.816667	2.135	2.51
Merged-chr1-196330511-4	chr1	196330326	196330731	FALSE	FALSE	TRUE	intron (NR_146057, intron 13 of 26)	intron (NR_146057, intron 13 of 26)	221083	NR_039888	100616363		NR_039888	ENSG00000265986	MIR4735	-	microRNA 4735	ncRNA	2.755	17.38	15.345	2.85	2.715	2.51
Merged-chr1-196381628-4	chr1	196381481	196381783	FALSE	TRUE	FALSE	intron (NR_146057, intron 12 of 26)	intron (NR_146057, intron 12 of 26)	169979	NR_039888	100616363		NR_039888	ENSG00000265986	MIR4735	-	microRNA 4735	ncRNA	1.395	8.86667	6.12	1.23667	1.355	2
Merged-chr1-196418779-4	chr1	196418543	196418974	FALSE	TRUE	FALSE	intron (NR_146057, intron 8 of 26)	intron (NR_146057, intron 8 of 26)	132853	NR_039888	100616363		NR_039888	ENSG00000265986	MIR4735	-	microRNA 4735	ncRNA	3.04	10.93	11.24	1.66	1.94	2.51
Merged-chr1-197305285-5	chr1	197304764	197305561	FALSE	TRUE	TRUE	intron (NM_001193640, intron 2 of 9)	intron (NM_001193640, intron 2 of 9)	67828	NR_047564	23418	Hs.126135	NM_012076	ENSG00000134376	CRB1	LCA8|RP12	crumbs 1, cell polarity complex component	protein-coding	5.5	32.2767	16.795	6.42333	6.785	3.51
Merged-chr1-197589855-4	chr1	197589561	197590265	FALSE	FALSE	TRUE	intron (NM_001195215, intron 10 of 22)	L2a|LINE|L2	154710	NM_001300858	163486	Hs.125056	NM_019049	ENSG00000213047	DENND1B	C1ORF18|C1orf218|FAM31B	DENN domain containing 1B	protein-coding	6.74	35.55	23.05	4.76667	8.53	6.01
Merged-chr1-197745129-5	chr1	197744745	197745562	FALSE	TRUE	FALSE	promoter-TSS (NM_001300858)	promoter-TSS (NM_001300858)	-530	NR_125340	163486	Hs.125056	NM_019049	ENSG00000213047	DENND1B	C1ORF18|C1orf218|FAM31B	DENN domain containing 1B	protein-coding	5.12	24.01	17.27	6.87	7.17	8.02
Merged-chr1-197908440-5	chr1	197908151	197908805	FALSE	TRUE	FALSE	Intergenic	Tigger3a|DNA|TcMar-Tigger	21961	NM_020204	56956	Hs.442578	NM_020204	ENSG00000143355	LHX9	-	LIM homeobox 9	protein-coding	2.165	20.8433	13.28	2.33667	1.16	2
Merged-chr1-197964262-5	chr1	197963842	197964701	FALSE	TRUE	TRUE	Intergenic	L2a|LINE|L2	77754	NM_020204	56956	Hs.442578	NM_020204	ENSG00000143355	LHX9	-	LIM homeobox 9	protein-coding	10.92	136.557	75.68	8.75333	6.975	7.02
Merged-chr1-198412667-3	chr1	198412495	198412846	FALSE	TRUE	FALSE	Intergenic	Intergenic	97405	NM_133262	127124	Hs.127743	NM_133262	ENSG00000151418	ATP6V1G3	ATP6G3|Vma10	ATPase H+ transporting V1 subunit G3	protein-coding	3.09	21.3267	6.21	1.91667	0.775	2.51
Merged-chr1-198668635-5	chr1	198668420	198668852	FALSE	TRUE	TRUE	intron (NM_002838, intron 4 of 32)	intron (NM_002838, intron 4 of 32)	60538	NM_002838	5788	Hs.654514	NM_002838	ENSG00000081237	PTPRC	B220|CD45|CD45R|GP180|L-CA|LCA|LY5|T200	protein tyrosine phosphatase, receptor type C	protein-coding	4.035	30.7067	20.38	4.65667	2.91	4.01
Merged-chr1-198850549-5	chr1	198850307	198850801	FALSE	TRUE	TRUE	intron (NR_040073, intron 2 of 2)	intron (NR_040073, intron 2 of 2)	-22272	NR_029626	406995		NR_029626	ENSG00000207759	MIR181A1	MIR213|MIRN181A1|MIRN213|hsa-mir-181a-1|mir-181a-1|mir-213	microRNA 181a-1	ncRNA	3.985	69.97	26.295	3.96	2.33	2
Merged-chr1-199991371-5	chr1	199991070	199991688	FALSE	TRUE	TRUE	Intergenic	Intergenic	-5351	NM_003822	2494	Hs.33446	NM_003822	ENSG00000116833	NR5A2	B1F|B1F2|CPF|FTF|FTZ-F1|FTZ-F1beta|LRH-1|LRH1|hB1F-2	nuclear receptor subfamily 5 group A member 2	protein-coding	3.33	36.1067	22.985	5.22333	4.265	4.51
Merged-chr1-200088191-4	chr1	200087965	200088506	FALSE	FALSE	TRUE	intron (NM_001276464, intron 5 of 6)	intron (NM_001276464, intron 5 of 6)	76282	NM_001276464	2494	Hs.33446	NM_003822	ENSG00000116833	NR5A2	B1F|B1F2|CPF|FTF|FTZ-F1|FTZ-F1beta|LRH-1|LRH1|hB1F-2	nuclear receptor subfamily 5 group A member 2	protein-coding	5.35	13.4067	15.73	3.41333	3.49	1
Merged-chr1-200341318-4	chr1	200341163	200341499	FALSE	FALSE	TRUE	intron (NR_040064, intron 2 of 4)	MIRc|SINE|MIR	1589	NR_040064	554279	Hs.434694	NR_040064	ENSG00000203721	LINC00862	C1orf98|SMIM16	long intergenic non-protein coding RNA 862	ncRNA	2.745	24.13	12.92	4.09667	2.52	1
Merged-chr1-200385293-5	chr1	200385008	200385624	FALSE	TRUE	TRUE	Intergenic	Intergenic	-6130	NM_012482	23528	Hs.59757	NM_012482	ENSG00000162702	ZNF281	ZBP-99|ZNP-99	zinc finger protein 281	protein-coding	5.72	65.23	23.275	5.88333	4.265	4.51
Merged-chr1-200398547-3	chr1	200398396	200398701	FALSE	TRUE	FALSE	Intergenic	AluJo|SINE|Alu	-19362	NM_012482	23528	Hs.59757	NM_012482	ENSG00000162702	ZNF281	ZBP-99|ZNP-99	zinc finger protein 281	protein-coding	2.385	16.1133	4.78	2.19667	1.745	2.51
Merged-chr1-200867540-5	chr1	200867334	200867757	FALSE	TRUE	TRUE	exon (NM_018265, exon 2 of 10)	exon (NM_018265, exon 2 of 10)	3596	NM_001142569	55765	Hs.518997	NM_018265	ENSG00000163362	INAVA	C1orf106	innate immunity activator	protein-coding	2.2	27.9167	14.845	3.56	2.715	4.01
Merged-chr1-200988623-5	chr1	200988388	200988945	FALSE	TRUE	TRUE	intron (NM_001252103, intron 1 of 33)	intron (NM_001252103, intron 1 of 33)	4162	NM_001252103	23046	Hs.169182	NM_017596	ENSG00000116852	KIF21B	-	kinesin family member 21B	protein-coding	3.77	34.78	15.775	1.91333	1.165	2.51
Merged-chr1-201139812-6	chr1	201139382	201140275	TRUE	TRUE	TRUE	intron (NM_001288564, intron 1 of 5)	intron (NM_001288564, intron 1 of 5)	882	NM_001288564	252839	Hs.181444	NM_016456	ENSG00000116857	TMEM9	DERM4|TMEM9A	transmembrane protein 9	protein-coding	37.49	180.173	61.925	10.8267	10.66	10.52
Merged-chr1-201144525-5	chr1	201144260	201144741	FALSE	TRUE	TRUE	Intergenic	Intergenic	-3790	NM_001288564	252839	Hs.181444	NM_016456	ENSG00000116857	TMEM9	DERM4|TMEM9A	transmembrane protein 9	protein-coding	3.955	27.35	13.445	4.25667	6.975	5.01
Merged-chr1-201268115-4	chr1	201267858	201268415	FALSE	TRUE	FALSE	intron (NM_001005337, intron 2 of 13)	intron (NM_001005337, intron 2 of 13)	15556	NM_000299	5317	Hs.497350	NM_000299	ENSG00000081277	PKP1	B6P	plakophilin 1	protein-coding	2.49	14.5833	8.615	2.74667	1.94	5.51
Merged-chr1-201430138-5	chr1	201429808	201430645	FALSE	TRUE	FALSE	Intergenic	AluJb|SINE|Alu	8073	NR_073080	23612	Hs.153944	NM_012396	ENSG00000174307	PHLDA3	TIH1	pleckstrin homology like domain family A member 3	protein-coding	3.71	29.4167	14.91	8.63333	5.815	6.52
Merged-chr1-201458627-3	chr1	201458500	201458756	FALSE	TRUE	FALSE	intron (NM_004078, intron 3 of 5)	intron (NM_004078, intron 3 of 5)	7073	NM_001193572	1465	Hs.108080	NM_004078	ENSG00000159176	CSRP1	CRP|CRP1|CSRP|CYRP|D1S181E|HEL-141|HEL-S-286	cysteine and glycine rich protein 1	protein-coding	0.775	9.73333	4.535	0.82	0.775	0.5
Merged-chr1-201596183-5	chr1	201595834	201596539	FALSE	TRUE	TRUE	Intergenic	Intergenic	-21264	NM_020443	89796	Hs.585374	NM_020443	ENSG00000134369	NAV1	POMFIL3|STEERIN1|UNC53H1	neuron navigator 1	protein-coding	3.735	22.3	44.925	3.40667	2.325	3.01
Merged-chr1-202016379-3	chr1	202016057	202016678	FALSE	TRUE	FALSE	Intergenic	Intergenic	36677	NM_001114309	1999	Hs.603657	NM_004433	ENSG00000163435	ELF3	EPR-1|ERT|ESE-1|ESX	E74 like ETS transcription factor 3	protein-coding	4.695	23.9033	9.385	6.45	3.875	6.01
Merged-chr1-202083725-4	chr1	202083515	202083963	FALSE	FALSE	TRUE	Intergenic	Intergenic	-8230	NM_004767	9283	Hs.132049	NM_004767	ENSG00000170075	GPR37L1	ET(B)R-LP-2|ETBR-LP-2|ETBRLP2	G protein-coupled receptor 37 like 1	protein-coding	2.12	14.6967	12.695	2.47667	1.745	1
Merged-chr1-202186090-3	chr1	202185959	202186240	FALSE	TRUE	FALSE	intron (NM_001017404, intron 1 of 15)	intron (NM_001017404, intron 1 of 15)	2816	NM_001017404	59352	Hs.497402	NM_021636	ENSG00000133067	LGR6	GPCR|VTS20631	leucine rich repeat containing G protein-coupled receptor 6	protein-coding	3.04	11.95	6.1	2.34333	0.78	1
Merged-chr1-202205766-4	chr1	202205553	202205983	FALSE	TRUE	FALSE	intron (NM_001017404, intron 4 of 15)	L2b|LINE|L2	22485	NM_001017404	59352	Hs.497402	NM_021636	ENSG00000133067	LGR6	GPCR|VTS20631	leucine rich repeat containing G protein-coupled receptor 6	protein-coding	4.44	16.9567	18.495	4.80667	3.105	3.51
Merged-chr1-202317561-5	chr1	202317359	202317753	FALSE	TRUE	TRUE	promoter-TSS (NM_002481)	promoter-TSS (NM_002481)	-274	NM_001167857	4660	Hs.444403	NM_002481	ENSG00000077157	PPP1R12B	MYPT2|PP1bp55	protein phosphatase 1 regulatory subunit 12B	protein-coding	9.075	50.71	20.625	3.44	4.46	4.01
Merged-chr1-202322374-6	chr1	202321999	202322714	FALSE	TRUE	TRUE	intron (NM_001167857, intron 1 of 9)	intron (NM_001167857, intron 1 of 9)	4526	NM_001167858	4660	Hs.444403	NM_002481	ENSG00000077157	PPP1R12B	MYPT2|PP1bp55	protein phosphatase 1 regulatory subunit 12B	protein-coding	3.515	32.66	23.255	5.33333	5.235	5.01
Merged-chr1-202345602-5	chr1	202345361	202345884	FALSE	TRUE	TRUE	intron (NM_001167857, intron 1 of 9)	intron (NM_001167857, intron 1 of 9)	27792	NM_001167858	4660	Hs.444403	NM_002481	ENSG00000077157	PPP1R12B	MYPT2|PP1bp55	protein phosphatase 1 regulatory subunit 12B	protein-coding	1.98	21.89	14.665	3.41333	4.845	5.51
Merged-chr1-203506245-4	chr1	203506030	203506469	FALSE	TRUE	FALSE	Intergenic	MamGypLTR3|LTR|Gypsy	42978	NM_014359	26254	Hs.632468	NM_014359	ENSG00000188770	OPTC	OPT	opticin	protein-coding	2.055	21.6467	7.73	2.07	1.36	1.5
Merged-chr1-203738781-5	chr1	203738497	203739062	FALSE	TRUE	TRUE	promoter-TSS (NM_001282878)	promoter-TSS (NM_001282878)	13	NM_001282878	54900	Hs.272794	NM_017773	ENSG00000122188	LAX1	LAX	lymphocyte transmembrane adaptor 1	protein-coding	3.515	39.89	14.825	3.43333	1.555	2
Merged-chr1-203895378-5	chr1	203895095	203895820	FALSE	TRUE	TRUE	Intergenic	Intergenic	64479	NM_001328637	6635	Hs.334612	NM_003094	ENSG00000182004	SNRPE	HYPT11|SME|Sm-E|snRNP-E	small nuclear ribonucleoprotein polypeptide E	protein-coding	3.38	48.5267	22.28	4.37667	2.135	4.01
Merged-chr1-204071471-6	chr1	204071153	204072096	TRUE	TRUE	TRUE	intron (NM_005686, intron 1 of 13)	intron (NM_005686, intron 1 of 13)	29378	NM_005686	9580	Hs.201671	NM_005686	ENSG00000143842	SOX13	ICA12|Sox-13	SRY-box 13	protein-coding	16.15	90.0367	58.98	10.2733	4.65	10.02
Merged-chr1-204264979-5	chr1	204264534	204265379	FALSE	TRUE	TRUE	intron (NM_014935, intron 1 of 22)	intron (NM_014935, intron 1 of 22)	64101	NM_014935	22874	Hs.253146	NM_014935	ENSG00000143850	PLEKHA6	PEPP-3|PEPP3	pleckstrin homology domain containing A6	protein-coding	7.945	59.81	24.705	7.13	6.01	6.01
Merged-chr1-204376653-4	chr1	204376487	204376878	FALSE	FALSE	TRUE	intron (NM_032833, intron 1 of 1)	intron (NM_032833, intron 1 of 1)	4263	NM_032833	84919	Hs.304376	NM_032833	ENSG00000158615	PPP1R15B	CREP|MSSGM2	protein phosphatase 1 regulatory subunit 15B	protein-coding	3.01	15.7167	11.065	2.19	1.745	3.01
Merged-chr1-204381224-6	chr1	204380962	204381563	TRUE	TRUE	TRUE	promoter-TSS (NM_032833)	promoter-TSS (NM_032833)	-317	NM_032833	84919	Hs.304376	NM_032833	ENSG00000158615	PPP1R15B	CREP|MSSGM2	protein phosphatase 1 regulatory subunit 15B	protein-coding	25.685	74.58	55.67	6.29667	5.815	5.51
Merged-chr1-204469131-4	chr1	204468941	204469308	FALSE	FALSE	TRUE	Intergenic	MLT1D|LTR|ERVL-MaLR	-9650	NM_002646	5287	Hs.497487	NM_002646	ENSG00000133056	PIK3C2B	C2-PI3K	phosphatidylinositol-4-phosphate 3-kinase catalytic subunit type 2 beta	protein-coding	1.65	14.49	13.755	1.78667	1.55	1.5
Merged-chr1-204476425-7	chr1	204475962	204477258	TRUE	TRUE	TRUE	Intergenic	Intergenic	-8897	NM_001278518	4194	Hs.497492	NM_002393	ENSG00000198625	MDM4	HDMX|MDMX|MRP1	MDM4, p53 regulator	protein-coding	25.775	97.9067	97.51	11.1367	13.57	15.54
Merged-chr1-204535011-5	chr1	204534781	204535179	FALSE	TRUE	TRUE	Intergenic	MIR3|SINE|MIR	49473	NM_001278517	4194	Hs.497492	NM_002393	ENSG00000198625	MDM4	HDMX|MDMX|MRP1	MDM4, p53 regulator	protein-coding	1.935	22.8633	10.425	3.42	2.135	3.51
Merged-chr1-204888057-3	chr1	204887898	204888204	FALSE	TRUE	FALSE	intron (NM_001005388, intron 1 of 29)	L1MC5|LINE|L1	-25303	NM_001160331	23114	Hs.13349	NM_015090	ENSG00000163531	NFASC	NF|NRCAML	neurofascin	protein-coding	2.2	10.32	3.4	2.86333	1.355	2.51
Merged-chr1-205457239-5	chr1	205456972	205457488	FALSE	TRUE	TRUE	Intergenic	MER30|DNA|hAT-Charlie	-16454	NM_212503	5129	Hs.445402	NM_002596	ENSG00000117266	CDK18	PCTAIRE|PCTAIRE3|PCTK3	cyclin dependent kinase 18	protein-coding	4.255	30.1233	22.76	2.88333	1.94	2.51
Merged-chr1-205876672-5	chr1	205876437	205876980	FALSE	TRUE	TRUE	Intergenic	MER44B|DNA|TcMar-Tigger	35880	NM_134325	115019	Hs.164073	NM_052934	ENSG00000174502	SLC26A9	-	solute carrier family 26 member 9	protein-coding	5.21	24.9833	19.4	2.87667	1.55	2
Merged-chr1-207100869-5	chr1	207100641	207101150	FALSE	TRUE	TRUE	TTS (NM_002644)	TTS (NM_002644)	-5517	NM_005449	9214	Hs.58831	NM_005449	ENSG00000162894	FCMR	FAIM3|TOSO	Fc fragment of IgM receptor	protein-coding	2.79	26.47	12.56	3.02667	1.36	1
Merged-chr1-207413804-4	chr1	207413642	207413997	FALSE	FALSE	TRUE	Intergenic	Intergenic	-80998	NM_000574	1604	Hs.126517	NM_000574	ENSG00000196352	CD55	CHAPLE|CR|CROM|DAF|TC	CD55 molecule (Cromer blood group)	protein-coding	1.5	13.7233	13.96	3.84333	2.52	2.51
Merged-chr1-207414888-5	chr1	207414574	207415303	FALSE	TRUE	TRUE	Intergenic	Intergenic	-79879	NM_000574	1604	Hs.126517	NM_000574	ENSG00000196352	CD55	CHAPLE|CR|CROM|DAF|TC	CD55 molecule (Cromer blood group)	protein-coding	13.58	81.8467	36.4	7.96	8.53	5.51
Merged-chr1-207509160-4	chr1	207508997	207509342	FALSE	FALSE	TRUE	intron (NM_000574, intron 6 of 9)	intron (NM_000574, intron 6 of 9)	14352	NM_001300904	1604	Hs.126517	NM_000574	ENSG00000196352	CD55	CHAPLE|CR|CROM|DAF|TC	CD55 molecule (Cromer blood group)	protein-coding	1.685	15.3233	11.785	1.62	1.355	2
Merged-chr1-207581458-4	chr1	207581275	207581622	FALSE	TRUE	FALSE	Intergenic	Intergenic	-46197	NM_001006658	1380	Hs.445757	NM_001877	ENSG00000117322	CR2	C3DR|CD21|CR|CVID7|SLEB9	complement C3d receptor 2	protein-coding	2.42	16.5867	6.645	1.63667	1.745	1
Merged-chr1-209847417-6	chr1	209847089	209847817	TRUE	TRUE	TRUE	intron (NR_134510, intron 1 of 2)	intron (NR_134510, intron 1 of 2)	1141	NR_134511	101930114	Hs.663934	NR_134509	ENSG00000227591	LOC101930114	-	uncharacterized LOC101930114	ncRNA	8.495	43.91	28.88	3.02667	2.135	3.51
Merged-chr1-209920279-3	chr1	209920067	209920464	FALSE	FALSE	TRUE	Intergenic	L1MA9|LINE|L1	-4358	NR_134510	101930114	Hs.663934	NR_134509	ENSG00000227591	LOC101930114	-	uncharacterized LOC101930114	ncRNA	1.65	7.15667	9.475	1.10333	0.97	1.5
Merged-chr1-210547327-6	chr1	210546963	210547692	TRUE	TRUE	TRUE	intron (NM_001170564, intron 3 of 9)	intron (NM_001170564, intron 3 of 9)	44687	NM_001170580	55733	Hs.58650	NM_018194	ENSG00000054392	HHAT	MART2|SKI1|Skn	hedgehog acyltransferase	protein-coding	12.705	123.773	46.24	7.8	7.56	6.52
Merged-chr1-210771608-5	chr1	210771260	210771863	FALSE	TRUE	TRUE	intron (NM_001170564, intron 8 of 9)	L1MA3|LINE|L1	268921	NM_001170580	55733	Hs.58650	NM_018194	ENSG00000054392	HHAT	MART2|SKI1|Skn	hedgehog acyltransferase	protein-coding	1.915	31.73	18.45	3.99	1.745	2.51
Merged-chr1-211411078-5	chr1	211410896	211411242	FALSE	TRUE	TRUE	Intergenic	Tigger3b|DNA|TcMar-Tigger	-21550	NM_001136224	55758	Hs.356399	NM_018254	ENSG00000117625	RCOR3	-	REST corepressor 3	protein-coding	1.21	15.4667	8.43	1.52333	0.97	3.01
Merged-chr1-211597567-5	chr1	211597434	211597728	FALSE	TRUE	TRUE	intron (NR_026761, intron 4 of 5)	AluJr|SINE|Alu	41484	NR_026761	84791	Hs.523932	NM_032705		LINC00467	C1orf97	long intergenic non-protein coding RNA 467	ncRNA	0.81	10.0267	10.015	1.51333	2.13	1
Merged-chr1-211725132-5	chr1	211724845	211725340	FALSE	TRUE	TRUE	Intergenic	AluJb|SINE|Alu	27007	NM_021194	7779	Hs.519469	NM_021194	ENSG00000170385	SLC30A1	ZNT1|ZRC1	solute carrier family 30 member 1	protein-coding	2.755	25.3533	9.655	4.37667	3.1	6.01
Merged-chr1-211895856-5	chr1	211895547	211896207	FALSE	TRUE	TRUE	Intergenic	Intergenic	46773	NR_148994	91548	Hs.367839	NR_148994		LOC91548	-	uncharacterized LOC91548	ncRNA	5.12	30.4233	31.53	5.76	4.265	3.01
Merged-chr1-212204422-6	chr1	212204033	212204901	TRUE	TRUE	TRUE	intron (NM_001199811, intron 1 of 19)	intron (NM_001199811, intron 1 of 19)	-4428	NM_016448	51514	Hs.656473	NM_016448	ENSG00000143476	DTL	CDT2|DCAF2|L2DTL|RAMP	denticleless E3 ubiquitin protein ligase homolog	protein-coding	16.735	93.2067	58	7.39333	4.46	5.01
Merged-chr1-212428526-4	chr1	212428332	212428729	FALSE	FALSE	TRUE	intron (NR_125984, intron 1 of 3)	intron (NR_125984, intron 1 of 3)	-20452	NR_125983	101929541	Hs.632493	NR_125982	ENSG00000226251	LOC101929541	-	uncharacterized LOC101929541	ncRNA	8.275	26.86	22.165	4.65667	4.65	2.51
Merged-chr1-212661958-5	chr1	212661551	212662248	FALSE	TRUE	TRUE	Intergenic	Intergenic	55670	NM_013349	29937	Hs.461787	NM_013349	ENSG00000117691	NENF	CIR2|SCIRP10|SPUF	neudesin neurotrophic factor	protein-coding	3.805	132.847	65.87	6.33333	2.715	5.01
Merged-chr1-212691926-5	chr1	212691674	212692190	FALSE	TRUE	TRUE	Intergenic	Intergenic	-27104	NR_125985	101929565		NR_125985	ENSG00000228067	LINC01740	-	long intergenic non-protein coding RNA 1740	ncRNA	6.34	32.9533	23.345	5.64333	3.49	5.51
Merged-chr1-212782022-5	chr1	212781754	212782263	FALSE	TRUE	TRUE	promoter-TSS (NM_001206488)	promoter-TSS (NM_001206488)	38	NM_001206488	467	Hs.460	NM_001674	ENSG00000162772	ATF3	-	activating transcription factor 3	protein-coding	9.88	49.23	36.81	5.49333	5.62	5.01
Merged-chr1-212856764-3	chr1	212856549	212856946	FALSE	TRUE	FALSE	Intergenic	Intergenic	16580	NM_018664	55509	Hs.62919	NM_018664	ENSG00000123685	BATF3	JDP1|JUNDM1|SNFT	basic leucine zipper ATF-like transcription factor 3	protein-coding	2.815	15.4667	7.345	1.35333	0.585	3.01
Merged-chr1-213088987-4	chr1	213088805	213089243	FALSE	TRUE	FALSE	Intergenic	Intergenic	-34838	NM_001136474	79805	Hs.96885	NM_024749	ENSG00000143494	VASH2	-	vasohibin 2	protein-coding	4.145	22.7467	11.105	3.81667	3.105	4.01
Merged-chr1-213222866-4	chr1	213222680	213223040	FALSE	FALSE	TRUE	Intergenic	Intergenic	-1715	NM_001349669	26750	Hs.591416	NM_012424	ENSG00000136643	RPS6KC1	RPK118|RSKL1|S6K-delta-1|S6PKh1|humS6PKh1	ribosomal protein S6 kinase C1	protein-coding	1.835	10.84	11.065	1.63333	1.165	1.5
Merged-chr1-213733352-4	chr1	213733160	213733564	FALSE	TRUE	FALSE	Intergenic	LTR40c|LTR|ERVL	-364730	NR_046189	100861504	Hs.742586	NR_046189		LINC00538	PROX1UT|Yiya	long intergenic non-protein coding RNA 538	ncRNA	1.73	18.2067	9.065	2.33	1.745	2
Merged-chr1-213742727-3	chr1	213742520	213742941	FALSE	TRUE	FALSE	Intergenic	Intergenic	-355362	NR_046189	100861504	Hs.742586	NR_046189		LINC00538	PROX1UT|Yiya	long intergenic non-protein coding RNA 538	ncRNA	3.04	21.16	9.315	4.26333	5.815	4.51
Merged-chr1-213821730-5	chr1	213821425	213821983	FALSE	TRUE	TRUE	Intergenic	Intergenic	-276388	NR_046189	100861504	Hs.742586	NR_046189		LINC00538	PROX1UT|Yiya	long intergenic non-protein coding RNA 538	ncRNA	3.63	40.2633	18.835	4.51667	2.71	4.51
Merged-chr1-213994369-4	chr1	213994054	213994699	FALSE	FALSE	TRUE	non-coding (NR_037850, exon 6 of 6)	non-coding (NR_037850, exon 6 of 6)	-103716	NR_046189	100861504	Hs.742586	NR_046189		LINC00538	PROX1UT|Yiya	long intergenic non-protein coding RNA 538	ncRNA	6.305	28.93	26.565	8.05667	8.725	6.01
Merged-chr1-214114442-5	chr1	214114004	214114779	FALSE	TRUE	TRUE	intron (NR_037850, intron 2 of 5)	intron (NR_037850, intron 2 of 5)	16299	NR_046189	100861504	Hs.742586	NR_046189		LINC00538	PROX1UT|Yiya	long intergenic non-protein coding RNA 538	ncRNA	4.575	100.65	47.21	6.47667	7.56	5.01
Merged-chr1-214185897-5	chr1	214185579	214186264	FALSE	TRUE	TRUE	intron (NM_002763, intron 4 of 4)	intron (NM_002763, intron 4 of 4)	24077	NM_002763	5629	Hs.741808	NM_002763	ENSG00000117707	PROX1	-	prospero homeobox 1	protein-coding	5.175	43.57	18.97	5.47667	4.075	5.01
Merged-chr1-214224457-5	chr1	214224001	214224651	FALSE	TRUE	TRUE	Intergenic	Intergenic	62482	NM_002763	5629	Hs.741808	NM_002763	ENSG00000117707	PROX1	-	prospero homeobox 1	protein-coding	6.27	36.55	19.175	8.6	8.725	7.02
Merged-chr1-214434902-5	chr1	214434592	214435204	FALSE	TRUE	TRUE	Intergenic	Intergenic	-19667	NM_020197	56950	Hs.66170	NM_020197	ENSG00000143499	SMYD2	HSKM-B|KMT3C|ZMYND14	SET and MYND domain containing 2	protein-coding	5.28	27.0133	20.195	5.35	4.85	6.01
Merged-chr1-214458101-4	chr1	214457841	214458512	FALSE	FALSE	TRUE	intron (NM_020197, intron 1 of 11)	intron (NM_020197, intron 1 of 11)	3611	NM_020197	56950	Hs.66170	NM_020197	ENSG00000143499	SMYD2	HSKM-B|KMT3C|ZMYND14	SET and MYND domain containing 2	protein-coding	6.985	22.35	17.045	5.76667	5.235	6.52
Merged-chr1-214613019-5	chr1	214612835	214613273	FALSE	TRUE	TRUE	intron (NM_005401, intron 3 of 18)	intron (NM_005401, intron 3 of 18)	111970	NM_005401	5784	Hs.193557	NM_005401	ENSG00000152104	PTPN14	CATLPH|PEZ|PTP36	protein tyrosine phosphatase, non-receptor type 14	protein-coding	6.12	31.8467	15.435	7.14333	4.46	6.01
Merged-chr1-214646978-5	chr1	214646718	214647342	FALSE	TRUE	TRUE	intron (NM_005401, intron 1 of 18)	intron (NM_005401, intron 1 of 18)	77994	NM_005401	5784	Hs.193557	NM_005401	ENSG00000152104	PTPN14	CATLPH|PEZ|PTP36	protein tyrosine phosphatase, non-receptor type 14	protein-coding	8.67	56.2933	27.49	6.19333	3.105	4.51
Merged-chr1-214740332-3	chr1	214740156	214740505	FALSE	TRUE	FALSE	Intergenic	Intergenic	-15306	NM_005401	5784	Hs.193557	NM_005401	ENSG00000152104	PTPN14	CATLPH|PEZ|PTP36	protein tyrosine phosphatase, non-receptor type 14	protein-coding	1.36	15.3967	5.395	2.20667	0.97	3.01
Merged-chr1-216038609-3	chr1	216038431	216038759	FALSE	TRUE	FALSE	intron (NM_206933, intron 44 of 71)	intron (NM_206933, intron 44 of 71)	-207212	NR_125992	102723833	Hs.232072	NR_125992	ENSG00000233620	LOC102723833	-	uncharacterized LOC102723833	ncRNA	1.73	9.12667	2.79	0.956667	2.325	2
Merged-chr1-216106022-5	chr1	216105650	216106314	FALSE	TRUE	TRUE	intron (NM_206933, intron 38 of 71)	intron (NM_206933, intron 38 of 71)	-139825	NR_125992	102723833	Hs.232072	NR_125992	ENSG00000233620	LOC102723833	-	uncharacterized LOC102723833	ncRNA	5.015	32.27	22.555	3.85	3.49	3.01
Merged-chr1-216650651-4	chr1	216650468	216650833	FALSE	FALSE	TRUE	Intergenic	Intergenic	-53912	NM_007123	7399	Hs.655974	NM_007123	ENSG00000042781	USH2A	RP39|US2|USH2|dJ1111A8.1	usherin	protein-coding	1.575	6.61667	13.785	0.946667	0.39	0.5
Merged-chr1-217647429-4	chr1	217647299	217647571	FALSE	FALSE	TRUE	intron (NM_018040, intron 8 of 9)	intron (NM_018040, intron 8 of 9)	157019	NM_018040	55105	Hs.362343	NM_018040	ENSG00000092978	GPATCH2	CT110|GPATC2|PPP1R30|Pfa1	G-patch domain containing 2	protein-coding	1.5	6.35	5.825	0.686667	1.935	0
Merged-chr1-218545601-5	chr1	218545248	218545885	FALSE	TRUE	TRUE	intron (NM_001135599, intron 2 of 7)	intron (NM_001135599, intron 2 of 7)	-26546	NR_046268	728463	Hs.568469	NR_046268	ENSG00000232480	TGFB2-AS1	-	TGFB2 antisense RNA 1 (head to head)	ncRNA	7.65	26.42	30.645	3.68667	4.65	4.51
Merged-chr1-219262498-5	chr1	219262266	219262834	FALSE	TRUE	TRUE	intron (NR_038845, intron 3 of 4)	L1MA4|LINE|L1	84580	NR_038845	643723	Hs.519774	NR_038845		LYPLAL1-DT	LYPLAL1-AS1	LYPLAL1 divergent transcript	ncRNA	2.79	32.1867	17.18	3.84667	2.91	4.01
Merged-chr1-219410854-3	chr1	219410678	219411085	FALSE	TRUE	FALSE	Intergenic	Intergenic	62570	NM_001300772	127018	Hs.657617	NM_138794	ENSG00000143353	LYPLAL1	Q96AV0	lysophospholipase like 1	protein-coding	3.515	19.1067	7.705	4.94	4.46	4.51
Merged-chr1-219482466-4	chr1	219482325	219482659	FALSE	TRUE	FALSE	Intergenic	THE1A-int|LTR|ERVL-MaLR	134181	NM_001300772	127018	Hs.657617	NM_138794	ENSG00000143353	LYPLAL1	Q96AV0	lysophospholipase like 1	protein-coding	1.685	9.36	7.55	0.96	1.745	1.5
Merged-chr1-219504331-4	chr1	219503975	219504731	FALSE	FALSE	TRUE	Intergenic	Intergenic	156042	NM_001300772	127018	Hs.657617	NM_138794	ENSG00000143353	LYPLAL1	Q96AV0	lysophospholipase like 1	protein-coding	5.535	35.1533	21.85	7.26667	7.56	6.01
Merged-chr1-220091394-5	chr1	220091126	220091698	FALSE	TRUE	TRUE	intron (NR_046437, intron 3 of 3)	intron (NR_046437, intron 3 of 3)	10581	NM_018713	55532	Hs.284450	NM_018713	ENSG00000196660	SLC30A10	HMDPC|HMNDYT1|ZNT10|ZNT8|ZRC1|ZnT-10	solute carrier family 30 member 10	protein-coding	3.345	33.12	13.415	4.26667	1.355	2
Merged-chr1-220100393-10	chr1	220099542	220101090	TRUE	TRUE	TRUE	intron (NR_046437, intron 2 of 3)	intron (NR_046437, intron 2 of 3)	1677	NM_018713	55532	Hs.284450	NM_018713	ENSG00000196660	SLC30A10	HMDPC|HMNDYT1|ZNT10|ZNT8|ZRC1|ZnT-10	solute carrier family 30 member 10	protein-coding	31.605	128.593	90.575	11.0067	12.985	18.04
Merged-chr1-220219675-6	chr1	220219387	220220020	TRUE	TRUE	TRUE	exon (NM_004446, exon 1 of 32)	exon (NM_004446, exon 1 of 32)	297	NM_004446	2058	Hs.497788	NM_004446	ENSG00000136628	EPRS	EARS|GLUPRORS|PARS|PIG32|QARS|QPRS	glutamyl-prolyl-tRNA synthetase	protein-coding	12.08	81.9133	61.265	6.72667	7.755	3.51
Merged-chr1-220820376-4	chr1	220820193	220820587	FALSE	FALSE	TRUE	intron (NM_001286128, intron 12 of 15)	L1PA10|LINE|L1	-43238	NM_024709	79762	Hs.519839	NM_024709	ENSG00000162817	C1orf115	-	chromosome 1 open reading frame 115	protein-coding	2.855	10.73	10.2	1.36667	0.97	2
Merged-chr1-221135568-4	chr1	221135363	221135807	FALSE	TRUE	FALSE	Intergenic	Intergenic	-82103	NR_046901	100873924	Hs.645593	NR_046901	ENSG00000257551	HLX-AS1	-	HLX antisense RNA 1	ncRNA	1.76	26.4733	7.185	2.46333	0.97	2.51
Merged-chr1-221490035-5	chr1	221489755	221490280	FALSE	TRUE	TRUE	Intergenic	Intergenic	19621	NR_024236	400804	Hs.722626	NR_024236	ENSG00000234754	C1orf140	-	uncharacterized LOC400804	ncRNA	3.075	21.9933	23.165	1.63667	1.745	4.01
Merged-chr1-222013202-5	chr1	222012914	222013431	FALSE	TRUE	TRUE	intron (NR_125989, intron 2 of 3)	intron (NR_125989, intron 2 of 3)	836	NR_125989	101929771	Hs.557001	NR_125989	ENSG00000227925	LINC01655	-	long intergenic non-protein coding RNA 1655	ncRNA	4.185	29.8267	13.735	2.87	1.555	2
Merged-chr1-222629059-5	chr1	222628643	222629549	FALSE	TRUE	TRUE	Intergenic	Intergenic	92348	NM_024746	79802	Hs.665660	NM_024746	ENSG00000143512	HHIPL2	KIAA1822L	HHIP like 2	protein-coding	8.165	96.43	88.715	7.70333	5.04	5.01
Merged-chr1-222985300-3	chr1	222985078	222985614	FALSE	TRUE	FALSE	Intergenic	MIR3|SINE|MIR	-3077	NM_001350630	84976	Hs.528817	NM_032890	ENSG00000154309	DISP1	DISPA	dispatched RND transporter family member 1	protein-coding	4.725	25.9633	9.11	4.81	3.685	2.51
Merged-chr1-223065579-4	chr1	223065257	223065996	FALSE	TRUE	FALSE	intron (NM_001350630, intron 1 of 8)	MER99|DNA|hAT?	77203	NM_032890	84976	Hs.528817	NM_032890	ENSG00000154309	DISP1	DISPA	dispatched RND transporter family member 1	protein-coding	5.985	37.9967	15.73	6.17667	4.845	5.01
Merged-chr1-223235724-5	chr1	223235496	223236022	FALSE	TRUE	TRUE	Intergenic	Intergenic	80865	NM_003268	7100	Hs.604542	NM_003268	ENSG00000187554	TLR5	MELIOS|SLE1|SLEB1|TIL3	toll like receptor 5	protein-coding	2.42	31.63	13.395	2.19667	2.13	3.01
Merged-chr1-224092188-5	chr1	224091886	224092448	FALSE	TRUE	TRUE	Intergenic	Intergenic	-58493	NM_005426	7159	Hs.523968	NM_005426	ENSG00000143514	TP53BP2	53BP2|ASPP2|BBP|P53BP2|PPP1R13A	tumor protein p53 binding protein 2	protein-coding	0.59	22.63	7.325	0.543333	0.39	4.51
Merged-chr1-224181398-5	chr1	224181106	224181727	FALSE	TRUE	TRUE	intron (NR_136593, intron 1 of 4)	AluSx|SINE|Alu	984	NR_136593	100287497	Hs.568390	NR_136590		LOC100287497	-	septin 7 pseudogene	pseudo	3.195	15.6933	11.065	1.37	2.325	6.52
Merged-chr1-225232155-4	chr1	225231901	225232398	FALSE	FALSE	TRUE	intron (NM_001373, intron 15 of 83)	intron (NM_001373, intron 15 of 83)	114793	NM_001373	127602	Hs.133977	NM_001373	ENSG00000185842	DNAH14	C1orf67|Dnahc14|HL-18|HL18	dynein axonemal heavy chain 14	protein-coding	3.345	21.2667	16.545	2.85	2.13	3.01
Merged-chr1-225629283-5	chr1	225629101	225629420	FALSE	TRUE	TRUE	Intergenic	Intergenic	-12703	NM_194442	3930	Hs.435166	NM_002296	ENSG00000143815	LBR	DHCR14B|LMN2R|PHA|TDRD18	lamin B receptor	protein-coding	1.835	16.8467	8.885	3.97333	3.685	3.01
Merged-chr1-225632983-5	chr1	225632605	225633317	FALSE	TRUE	TRUE	Intergenic	Intergenic	-16404	NM_194442	3930	Hs.435166	NM_002296	ENSG00000143815	LBR	DHCR14B|LMN2R|PHA|TDRD18	lamin B receptor	protein-coding	5.67	34.19	14.8	5.89	5.62	3.51
Merged-chr1-225642167-5	chr1	225641917	225642581	FALSE	TRUE	TRUE	Intergenic	Intergenic	-25692	NM_194442	3930	Hs.435166	NM_002296	ENSG00000143815	LBR	DHCR14B|LMN2R|PHA|TDRD18	lamin B receptor	protein-coding	8.645	53.8767	25.09	6.44667	4.845	5.51
Merged-chr1-225843661-3	chr1	225843499	225843889	FALSE	TRUE	FALSE	Intergenic	Intergenic	-2849	NM_018212	55740	Hs.497893	NM_018212	ENSG00000154380	ENAH	ENA|MENA|NDPP1	ENAH, actin regulator	protein-coding	3.63	18.0133	6.165	2.05333	2.325	4.01
Merged-chr1-226277031-5	chr1	226276833	226277216	FALSE	TRUE	TRUE	intron (NR_146920, intron 2 of 3)	MLT1J|LTR|ERVL-MaLR	5748	NR_146920	105373113	Hs.149726	NR_146920		LINC01703	-	long intergenic non-protein coding RNA 1703	ncRNA	1.43	9.56	9.065	1.92333	0.97	2
Merged-chr1-226534452-5	chr1	226534214	226534798	FALSE	TRUE	TRUE	Intergenic	Intergenic	-37057	NM_001270410	286826	Hs.120817	NM_173083	ENSG00000183814	LIN9	BARA|BARPsv|Lin-9|TGS|TGS1|TGS2	lin-9 DREAM MuvB core complex component	protein-coding	2.855	14.2933	12.92	1.23	3.49	1.5
Merged-chr1-226667300-3	chr1	226667145	226667474	FALSE	TRUE	FALSE	Intergenic	HAL1|LINE|L1	-69192	NM_001003665	375057	Hs.116827	NM_001003665	ENSG00000203685	STUM	C1orf95	stum, mechanosensory transduction mediator homolog	protein-coding	1.685	14.8933	5.01	3.30333	2.33	1.5
Merged-chr1-227231631-3	chr1	227231389	227231941	FALSE	TRUE	FALSE	intron (NM_003607, intron 22 of 35)	L1M7|LINE|L1	103727	NM_020247	56997	Hs.118241	NM_020247	ENSG00000163050	COQ8A	ADCK3|ARCA2|CABC1|COQ10D4|COQ8|SCAR9	coenzyme Q8A	protein-coding	2.275	17.59	9.905	3.29667	1.745	3.01
Merged-chr1-227258538-4	chr1	227258314	227258739	FALSE	FALSE	TRUE	intron (NM_003607, intron 20 of 35)	intron (NM_003607, intron 20 of 35)	130588	NM_020247	56997	Hs.118241	NM_020247	ENSG00000163050	COQ8A	ADCK3|ARCA2|CABC1|COQ10D4|COQ8|SCAR9	coenzyme Q8A	protein-coding	2.93	13.73	16.205	2.19667	2.325	2.51
Merged-chr1-227398504-5	chr1	227398126	227398863	FALSE	TRUE	TRUE	intron (NM_003607, intron 3 of 35)	intron (NM_003607, intron 3 of 35)	107332	NM_014826	8476	Hs.35433	NM_003607	ENSG00000143776	CDC42BPA	MRCK|MRCKA|PK428	CDC42 binding protein kinase alpha	protein-coding	2.755	45.8933	21.33	4.40333	2.905	3.51
Merged-chr1-227505316-5	chr1	227505051	227505650	FALSE	TRUE	TRUE	5' UTR (NM_014826, exon 1 of 35)	5' UTR (NM_014826, exon 1 of 35)	476	NM_014826	8476	Hs.35433	NM_003607	ENSG00000143776	CDC42BPA	MRCK|MRCKA|PK428	CDC42 binding protein kinase alpha	protein-coding	5.72	35.7	22.05	6.02333	3.88	5.51
Merged-chr1-228453090-5	chr1	228452715	228453408	FALSE	TRUE	TRUE	intron (NM_052843, intron 16 of 80)	intron (NM_052843, intron 16 of 80)	-51696	NR_073154	574407	Hs.650039	NM_001025495	ENSG00000162913	OBSCN-AS1	C1orf145	OBSCN antisense RNA 1	ncRNA	6.085	33.01	25.75	3.38667	3.68	2.51
Merged-chr1-228593069-5	chr1	228592859	228593382	FALSE	TRUE	TRUE	intron (NM_145214, intron 1 of 5)	intron (NM_145214, intron 1 of 5)	1397	NM_145214	81559	Hs.13543	NM_145214	ENSG00000154370	TRIM11	BIA1|RNF92	tripartite motif containing 11	protein-coding	4.07	11.1167	12.805	2.47333	1.94	3.51
Merged-chr1-228678276-5	chr1	228677879	228678513	FALSE	TRUE	TRUE	intron (NM_001010858, intron 2 of 3)	intron (NM_001010858, intron 2 of 3)	3128	NM_001010858	149603	Hs.356377	NM_001010858	ENSG00000168159	RNF187	RACO-1|RACO1	ring finger protein 187	protein-coding	6.11	41.6467	31.3	4.55667	2.91	3.01
Merged-chr1-228859860-5	chr1	228859613	228860072	FALSE	TRUE	TRUE	intron (NR_037962, intron 1 of 2)	L2a|LINE|L2	-10982	NM_021205	58480	Hs.647774	NM_021205	ENSG00000116574	RHOU	ARHU|CDC42L1|G28K|WRCH1|hG28K	ras homolog family member U	protein-coding	1.535	17.86	11.22	2.75333	1.745	1.5
Merged-chr1-228974198-5	chr1	228973940	228974477	FALSE	TRUE	TRUE	Intergenic	Intergenic	103384	NM_021205	58480	Hs.647774	NM_021205	ENSG00000116574	RHOU	ARHU|CDC42L1|G28K|WRCH1|hG28K	ras homolog family member U	protein-coding	9.05	26.2	17.32	6.46	6.395	7.52
Merged-chr1-228997010-3	chr1	228996826	228997217	FALSE	TRUE	FALSE	Intergenic	Intergenic	126197	NM_021205	58480	Hs.647774	NM_021205	ENSG00000116574	RHOU	ARHU|CDC42L1|G28K|WRCH1|hG28K	ras homolog family member U	protein-coding	3.26	20.3633	6.89	4.12	2.325	4.01
Merged-chr1-229163495-4	chr1	229163199	229163837	FALSE	TRUE	FALSE	Intergenic	MER112|DNA|hAT-Charlie	147030	NR_039659	100616234		NR_039659	ENSG00000283468	MIR4454	-	microRNA 4454	ncRNA	4.945	34.1567	12.125	5.06667	4.265	6.01
Merged-chr1-229357126-5	chr1	229356903	229357674	FALSE	TRUE	TRUE	Intergenic	Intergenic	-46740	NR_039659	100616234		NR_039659	ENSG00000283468	MIR4454	-	microRNA 4454	ncRNA	9.165	46.5067	23.8	10.4333	9.305	8.52
Merged-chr1-229432400-4	chr1	229432176	229432644	FALSE	TRUE	FALSE	intron (NR_073545, intron 4 of 7)	intron (NR_073545, intron 4 of 7)	-7719	NM_006542	10638	Hs.296169	NM_006542	ENSG00000213029	SPHAR	-	S-phase response (cyclin related)	protein-coding	2.67	26.13	10.745	2.33	2.13	3.51
Merged-chr1-229691217-2	chr1	229691072	229691342	FALSE	FALSE	TRUE	intron (NM_012089, intron 1 of 12)	intron (NM_012089, intron 1 of 12)	3235	NM_012089	23456	Hs.17614	NM_012089	ENSG00000135776	ABCB10	EST20237|M-ABC2|MTABC2	ATP binding cassette subfamily B member 10	protein-coding	2.305	3.32333	7.5	1.64	1.165	0.5
Merged-chr1-230260212-5	chr1	230259793	230260574	FALSE	TRUE	TRUE	intron (NM_004481, intron 1 of 15)	intron (NM_004481, intron 1 of 15)	57241	NM_004481	2590	Hs.743964	NM_004481	ENSG00000143641	GALNT2	GalNAc-T2	polypeptide N-acetylgalactosaminyltransferase 2	protein-coding	6.775	49.22	31.12	4.92333	6.595	4.51
Merged-chr1-230294709-5	chr1	230294456	230294962	FALSE	TRUE	TRUE	intron (NM_004481, intron 1 of 15)	intron (NM_004481, intron 1 of 15)	91767	NM_004481	2590	Hs.743964	NM_004481	ENSG00000143641	GALNT2	GalNAc-T2	polypeptide N-acetylgalactosaminyltransferase 2	protein-coding	8.385	35.9633	22.35	5.64	4.455	3.01
Merged-chr1-230775624-6	chr1	230775431	230775823	TRUE	TRUE	TRUE	Intergenic	Intergenic	-2575	NM_007357	22796	Hs.211800	NM_007357	ENSG00000135775	COG2	CDG2Q|LDLC	component of oligomeric golgi complex 2	protein-coding	8.45	27.6267	10.745	3.41667	3.685	3.01
Merged-chr1-230850135-3	chr1	230849638	230850547	FALSE	TRUE	FALSE	5' UTR (NM_000029, exon 1 of 5)	5' UTR (NM_000029, exon 1 of 5)	244	NM_000029	183	Hs.19383	NM_000029	ENSG00000135744	AGT	ANHU|SERPINA8|hFLT1	angiotensinogen	protein-coding	11.4	31.31	14.485	8.24	7.365	6.52
Merged-chr1-230880389-4	chr1	230880226	230880537	FALSE	FALSE	TRUE	Intergenic	Intergenic	-2749	NM_001319676	10753	Hs.498021	NM_006615	ENSG00000135773	CAPN9	GC36|nCL-4	calpain 9	protein-coding	2.49	15.05	12.355	2.61	2.325	2.51
Merged-chr1-230918369-3	chr1	230918172	230918517	FALSE	FALSE	TRUE	intron (NM_006615, intron 11 of 19)	intron (NM_006615, intron 11 of 19)	35214	NM_016452	10753	Hs.498021	NM_006615	ENSG00000135773	CAPN9	GC36|nCL-4	calpain 9	protein-coding	2.165	4.05333	9.18	0.816667	1.36	0.5
Merged-chr1-231185317-5	chr1	231185169	231185532	FALSE	TRUE	TRUE	Intergenic	Tigger3b|DNA|TcMar-Tigger	-9355	NM_198552	375061	Hs.38516	NM_198552	ENSG00000182118	FAM89A	C1orf153	family with sequence similarity 89 member A	protein-coding	1.615	12.18	11.375	2.34667	0.97	2
Merged-chr1-231336253-5	chr1	231335980	231336599	FALSE	TRUE	TRUE	intron (NM_001004342, intron 4 of 9)	intron (NM_001004342, intron 4 of 9)	-12916	NM_001256615	149373	Hs.632505	NM_001256615	ENSG00000235710	LOC149373	-	uncharacterized LOC149373	protein-coding	3.195	31.2867	14.325	2.60333	3.49	4.51
Merged-chr1-231384678-4	chr1	231384398	231384839	FALSE	TRUE	FALSE	intron (NM_001316350, intron 1 of 14)	Tigger3a|DNA|TcMar-Tigger	-7685	NM_152379	128061	Hs.743464	NM_152379	ENSG00000143633	C1orf131	-	chromosome 1 open reading frame 131	protein-coding	2.275	15.1933	7.8	2.46667	1.745	3.51
Merged-chr1-231568079-5	chr1	231567903	231568238	FALSE	TRUE	TRUE	Intergenic	MER51A|LTR|ERV1	-7280	NM_022051	54583	Hs.444450	NM_022051	ENSG00000135766	EGLN1	C1orf12|ECYT3|HALAH|HIF-PH2|HIFPH2|HPH-2|HPH2|PHD2|SM20|ZMYND6	egl-9 family hypoxia inducible factor 1	protein-coding	2.12	17.4867	10.155	3.15333	4.265	3.51
Merged-chr1-231977887-3	chr1	231977671	231978233	FALSE	TRUE	FALSE	intron (NM_001164541, intron 9 of 9)	AluJr|SINE|Alu	-23689	NR_002227	27184	Hs.720568	NR_002227		DISC2	DISC1-AS1|DISC1OS|NCRNA00015	disrupted in schizophrenia 2 (non-protein coding)	ncRNA	5.605	23.4167	9.475	6.9	4.85	7.02
Merged-chr1-232210215-4	chr1	232209997	232210383	FALSE	FALSE	TRUE	Intergenic	L1MEg|LINE|L1	148610	NR_126441	104472714		NR_126441	ENSG00000226758	DISC1-IT1	-	DISC1 intronic transcript 1	ncRNA	1.65	7.98	8.975	1.21333	2.52	1
Merged-chr1-232559514-2	chr1	232559378	232559684	FALSE	FALSE	TRUE	intron (NM_020808, intron 16 of 20)	L1MC1|LINE|L1	91823	NM_020808	57568	Hs.745009	NM_020808	ENSG00000116991	SIPA1L2	SPAL2	signal induced proliferation associated 1 like 2	protein-coding	1.21	2.99333	7.975	0.966667	0.39	0
Merged-chr1-234643526-5	chr1	234643338	234643771	FALSE	TRUE	TRUE	Intergenic	Intergenic	23971	NR_038426	100506795	Hs.448989	NR_038426	ENSG00000231768	LINC01354	-	long intergenic non-protein coding RNA 1354	ncRNA	3.77	16.72	12.83	1.78333	0.97	2.51
Merged-chr1-234645768-5	chr1	234645509	234646106	FALSE	TRUE	TRUE	Intergenic	Intergenic	21718	NR_038426	100506795	Hs.448989	NR_038426	ENSG00000231768	LINC01354	-	long intergenic non-protein coding RNA 1354	ncRNA	4.61	19.1067	18.04	2.44667	3.875	1.5
Merged-chr1-234659481-5	chr1	234658958	234659924	FALSE	TRUE	TRUE	Intergenic	Intergenic	8084	NR_038426	100506795	Hs.448989	NR_038426	ENSG00000231768	LINC01354	-	long intergenic non-protein coding RNA 1354	ncRNA	9.695	45	29.015	8.36333	3.485	7.52
Merged-chr1-234681993-5	chr1	234681624	234682444	FALSE	TRUE	TRUE	Intergenic	Intergenic	-14509	NR_038426	100506795	Hs.448989	NR_038426	ENSG00000231768	LINC01354	-	long intergenic non-protein coding RNA 1354	ncRNA	4.99	46.4167	31.3	9.43333	7.175	7.02
Merged-chr1-234748584-5	chr1	234748283	234749278	FALSE	TRUE	TRUE	Intergenic	Intergenic	-3509	NM_001077397	359948	Hs.350268	NM_182972	ENSG00000168264	IRF2BP2	CVID14	interferon regulatory factor 2 binding protein 2	protein-coding	11.94	79.21	47.325	9.14667	12.215	10.02
Merged-chr1-234820561-7	chr1	234820059	234821148	FALSE	TRUE	TRUE	Intergenic	Intergenic	38568	NR_125944	101927787	Hs.520658	NR_125944	ENSG00000228044	LOC101927787	-	uncharacterized LOC101927787	ncRNA	10.03	58.5867	37.15	9.17667	9.695	5.51
Merged-chr1-235010464-6	chr1	235010132	235010896	FALSE	TRUE	TRUE	Intergenic	L3|LINE|CR1	89232	NR_125945	101927851	Hs.520684	NR_125945	ENSG00000238005	LOC101927851	-	uncharacterized LOC101927851	ncRNA	8.84	40.84	24.255	7.94	6.01	9.02
Merged-chr1-235012229-3	chr1	235011938	235012436	FALSE	TRUE	FALSE	Intergenic	Intergenic	87559	NR_125945	101927851	Hs.520684	NR_125945	ENSG00000238005	LOC101927851	-	uncharacterized LOC101927851	ncRNA	6.86	24.0767	9.655	4.96667	5.235	7.52
Merged-chr1-235092601-4	chr1	235092413	235092850	FALSE	TRUE	FALSE	TTS (NR_125945)	TTS (NR_125945)	7115	NR_125945	101927851	Hs.520684	NR_125945	ENSG00000238005	LOC101927851	-	uncharacterized LOC101927851	ncRNA	4.795	13.9367	14.095	3.12333	3.1	5.51
Merged-chr1-235099189-6	chr1	235098740	235099549	TRUE	TRUE	TRUE	intron (NR_125945, intron 1 of 3)	intron (NR_125945, intron 1 of 3)	602	NR_125945	101927851	Hs.520684	NR_125945	ENSG00000238005	LOC101927851	-	uncharacterized LOC101927851	ncRNA	18.375	125.39	66.05	9.57667	9.305	6.52
Merged-chr1-235276018-5	chr1	235275761	235276499	FALSE	TRUE	TRUE	intron (NM_014765, intron 4 of 4)	intron (NM_014765, intron 4 of 4)	15122	NR_002956	677802	Hs.744743	NR_002956	ENSG00000207181	SNORA14B	ACA14b	small nucleolar RNA, H/ACA box 14B	snoRNA	7.835	60.44	26.7	4.95333	3.295	5.51
Merged-chr1-235989793-5	chr1	235989494	235990045	FALSE	TRUE	TRUE	non-coding (NR_102436, exon 4 of 4)	non-coding (NR_102436, exon 4 of 4)	26591	NR_031718	100302139		NR_031718	ENSG00000222831	MIR1537	MIRN1537|hsa-mir-1537|mir-1537	microRNA 1537	ncRNA	4.325	23.4933	14.735	4.23333	3.295	3.51
Merged-chr1-236332266-4	chr1	236332097	236332480	FALSE	TRUE	FALSE	intron (NM_003272, intron 2 of 6)	intron (NM_003272, intron 2 of 6)	26456	NM_003272	7107	Hs.498160	NM_003272	ENSG00000077585	GPR137B	TM7SF1	G protein-coupled receptor 137B	protein-coding	1.795	20.68	9.025	2.05333	1.94	3.01
Merged-chr1-236436821-4	chr1	236436626	236437005	FALSE	TRUE	FALSE	intron (NM_019891, intron 1 of 15)	L1ME3D|LINE|L1	8524	NM_019891	56605	Hs.558519	NM_019891	ENSG00000086619	ERO1B	ERO1LB|Ero1beta	endoplasmic reticulum oxidoreductase 1 beta	protein-coding	1.21	12.7533	8.09	1.65333	1.16	1.5
Merged-chr1-236563090-3	chr1	236562926	236563283	FALSE	TRUE	FALSE	intron (NM_080738, intron 1 of 5)	intron (NM_080738, intron 1 of 5)	4388	NM_080738	128178	Hs.352224	NM_080738	ENSG00000186197	EDARADD	ECTD11A|ECTD11B|ED3|EDA3	EDAR associated death domain	protein-coding	4.725	17.3967	5.595	3.42	3.1	2
Merged-chr1-236691121-2	chr1	236690993	236691228	FALSE	FALSE	TRUE	intron (NM_201545, intron 3 of 11)	AluSq2|SINE|Alu	-3302	NR_034040	100287902	Hs.677376	NR_034040	ENSG00000223776	LGALS8-AS1	-	LGALS8 antisense RNA 1	ncRNA	0.405	2.87333	7.525	0.813333	0.97	1
Merged-chr1-236998883-3	chr1	236998608	236999142	FALSE	TRUE	FALSE	exon (NM_001291939, exon 14 of 32)	exon (NM_001291939, exon 14 of 32)	40294	NM_000254	4548	Hs.498187	NM_000254	ENSG00000116984	MTR	HMAG|MS|cblG	5-methyltetrahydrofolate-homocysteine methyltransferase	protein-coding	5.2	27.6433	6.46	1.51333	1.55	4.51
Merged-chr1-240725496-4	chr1	240725316	240725711	FALSE	FALSE	TRUE	intron (NM_022469, intron 1 of 1)	intron (NM_022469, intron 1 of 1)	49949	NM_022469	64388	Hs.98206	NM_022469	ENSG00000180875	GREM2	CKTSF1B2|DAND3|PRDC|STHAG9	gremlin 2, DAN family BMP antagonist	protein-coding	1.465	10.0733	10.95	1.37	1.36	2.51
Merged-chr1-241804742-4	chr1	241804548	241805030	FALSE	TRUE	FALSE	Intergenic	Intergenic	-1088	NM_014322	23596	Hs.409081	NM_014322	ENSG00000054277	OPN3	ECPN|PPP1R116	opsin 3	protein-coding	3.565	19.48	9.54	4.67667	2.715	2.51
Merged-chr1-242206651-5	chr1	242206440	242206906	FALSE	TRUE	TRUE	Intergenic	MSTA|LTR|ERVL-MaLR	-44288	NM_001004343	440738	Hs.534971	NM_001004343	ENSG00000197769	MAP1LC3C	ATG8J|LC3C	microtubule associated protein 1 light chain 3 gamma	protein-coding	1.615	18.03	11.105	2.47667	1.36	0.5
Merged-chr1-243376557-5	chr1	243376318	243376772	FALSE	TRUE	TRUE	intron (NM_001042405, intron 3 of 18)	Looper|DNA|PiggyBac	42163	NM_001042405	9859	Hs.533635	NM_014812	ENSG00000143702	CEP170	FAM68A|KAB|KIAA0470	centrosomal protein 170	protein-coding	2.34	26.2	29.15	3.58	2.715	3.01
Merged-chr1-243488748-4	chr1	243488595	243489031	FALSE	FALSE	TRUE	intron (NM_001350248, intron 10 of 18)	intron (NM_001350248, intron 10 of 18)	-20665	NR_039824	100616343		NR_039824	ENSG00000265201	MIR4677	mir-4677	microRNA 4677	ncRNA	2.64	10.9567	12.56	3.17	4.07	5.51
Merged-chr1-244183573-3	chr1	244183420	244183768	FALSE	FALSE	TRUE	intron (NR_033883, intron 6 of 11)	MER53|DNA|hAT	-28647	NM_001278196	10472	Hs.69997	NM_006352	ENSG00000179456	ZBTB18	C2H2-171|MRD22|RP58|TAZ-1|ZNF238	zinc finger and BTB domain containing 18	protein-coding	1.36	5.70667	10.11	1.23	0.78	1.5
Merged-chr1-244387918-3	chr1	244387803	244388063	FALSE	FALSE	TRUE	Intergenic	Intergenic	-128004	NM_001276349	200159	Hs.442703	NM_001012970	ENSG00000173728	C1orf100	-	chromosome 1 open reading frame 100	protein-coding	0.655	8.83333	10.27	1.37667	1.55	0.5
Merged-chr1-244600560-4	chr1	244600265	244600730	FALSE	FALSE	TRUE	intron (NM_001126, intron 2 of 12)	MER112|DNA|hAT-Charlie	14939	NM_001126	159	Hs.498313	NM_001126	ENSG00000035687	ADSS	ADEH|ADSS 2	adenylosuccinate synthase	protein-coding	3.48	14.6467	13.26	3.14333	2.715	1.5
Merged-chr1-244817253-5	chr1	244817012	244817523	FALSE	TRUE	TRUE	intron (NR_123735, intron 1 of 4)	intron (NR_123735, intron 1 of 4)	917	NR_123736	51029	Hs.498317	NM_016076	ENSG00000121644	DESI2	C1orf121|CGI-146|DESI|DESI1|DeSI-2|FAM152A|PNAS-4|PPPDE1	desumoylating isopeptidase 2	protein-coding	5.82	22.8333	26.335	3.27333	4.46	4.01
Merged-chr1-245060051-3	chr1	245059789	245060325	FALSE	TRUE	FALSE	Intergenic	HAL1|LINE|L1	-32230	NM_031844	3192	Hs.106212	NM_004501	ENSG00000153187	HNRNPU	EIEE54|GRIP120|HNRNPU-AS1|HNRPU|SAF-A|SAFA|U21.1|hnRNP U|pp120	heterogeneous nuclear ribonucleoprotein U	protein-coding	2.94	26.1133	12.33	5.07667	3.295	5.51
Merged-chr1-245224103-3	chr1	245223887	245224310	FALSE	TRUE	FALSE	intron (NR_026587, intron 2 of 5)	intron (NR_026587, intron 2 of 5)	-89927	NR_111907	101928068	Hs.134857	NR_111907		LOC101928068	-	uncharacterized LOC101928068	ncRNA	3.63	14.5533	4.945	4.66333	3.875	3.01
Merged-chr1-245249713-6	chr1	245248944	245250216	FALSE	TRUE	TRUE	intron (NR_026587, intron 5 of 5)	intron (NR_026587, intron 5 of 5)	-68707	NM_018012	55083	Hs.143134	NM_018012	ENSG00000162849	KIF26B	-	kinesin family member 26B	protein-coding	9.74	51.6967	39.35	9.75	11.05	8.02
Merged-chr1-245258372-3	chr1	245258210	245258565	FALSE	TRUE	FALSE	intron (NR_026587, intron 5 of 5)	intron (NR_026587, intron 5 of 5)	-59900	NM_018012	55083	Hs.143134	NM_018012	ENSG00000162849	KIF26B	-	kinesin family member 26B	protein-coding	2.825	11.5733	6.12	1.78333	1.55	0.5
Merged-chr1-245314705-3	chr1	245314550	245314865	FALSE	TRUE	FALSE	Intergenic	L1MEf|LINE|L1	-3580	NM_018012	55083	Hs.143134	NM_018012	ENSG00000162849	KIF26B	-	kinesin family member 26B	protein-coding	1.21	11.38	5.235	0.826667	1.355	2.51
Merged-chr1-245762925-4	chr1	245762761	245763090	FALSE	FALSE	TRUE	intron (NM_018012, intron 5 of 14)	intron (NM_018012, intron 5 of 14)	-365106	NR_151721	111216275	Hs.663694	NR_151721	ENSG00000232192	KIF26B-AS1	-	KIF26B antisense RNA 1	ncRNA	3.075	9.30667	9.725	0.82	0.195	1
Merged-chr1-245951907-4	chr1	245951700	245952191	FALSE	FALSE	TRUE	intron (NM_022743, intron 10 of 11)	intron (NM_022743, intron 10 of 11)	-554126	NR_151721	111216275	Hs.663694	NR_151721	ENSG00000232192	KIF26B-AS1	-	KIF26B antisense RNA 1	ncRNA	3.075	11.8467	10.88	1.62667	1.555	0.5
Merged-chr1-246303131-5	chr1	246302742	246303584	FALSE	TRUE	TRUE	intron (NM_022743, intron 5 of 11)	intron (NM_022743, intron 5 of 11)	277551	NM_022743	64754	Hs.567571	NM_022743	ENSG00000185420	SMYD3	KMT3E|ZMYND1|ZNFN3A1|bA74P14.1	SET and MYND domain containing 3	protein-coding	3.195	42.21	19.65	7.65667	4.265	5.01
Merged-chr1-246746957-3	chr1	246746603	246747306	FALSE	TRUE	FALSE	intron (NM_001139459, intron 1 of 8)	intron (NM_001139459, intron 1 of 8)	17315	NM_152609	163882	Hs.368353	NM_152609	ENSG00000162852	CNST	C1orf71|PPP1R64	consortin, connexin sorting protein	protein-coding	7.47	37.3	18.815	7.95	8.725	5.51
Merged-chr1-246961311-4	chr1	246961180	246961429	FALSE	FALSE	TRUE	Intergenic	MER53|DNA|hAT	8385	NR_015422	149134	Hs.720494	NM_207326		LINC01341	-	long intergenic non-protein coding RNA 1341	ncRNA	0.84	10.8467	10.495	2.18333	2.325	3.51
Merged-chr1-246978043-4	chr1	246977829	246978275	FALSE	FALSE	TRUE	Intergenic	MER58B|DNA|hAT-Charlie	25133	NR_015422	149134	Hs.720494	NM_207326		LINC01341	-	long intergenic non-protein coding RNA 1341	ncRNA	3.195	12.62	12.085	2.06667	3.685	3.51
Merged-chr1-247072749-3	chr1	247072584	247072890	FALSE	TRUE	FALSE	intron (NM_015446, intron 4 of 35)	Tigger7|DNA|TcMar-Tigger	21989	NM_015446	25909	Hs.300887	NM_015446	ENSG00000153207	AHCTF1	ELYS|MST108|MSTP108|TMBS62	AT-hook containing transcription factor 1	protein-coding	2.09	10.2167	4.78	1.65667	0.78	2.51
Merged-chr1-247083425-4	chr1	247083170	247083851	FALSE	TRUE	FALSE	intron (NM_001323343, intron 1 of 35)	L1MEe|LINE|L1	11216	NM_015446	25909	Hs.300887	NM_015446	ENSG00000153207	AHCTF1	ELYS|MST108|MSTP108|TMBS62	AT-hook containing transcription factor 1	protein-coding	3.7	31.2733	15.115	6.46	5.235	3.51
Merged-chr1-248761260-3	chr1	248761149	248761381	FALSE	FALSE	TRUE	Intergenic	Intergenic	-4196	NM_001004693	127069	Hs.553585	NM_001004693	ENSG00000184022	OR2T10	OR1-64	olfactory receptor family 2 subfamily T member 10	protein-coding	0.59	4.52667	5.8	0.27	0.78	0
Merged-chr1-249123315-4	chr1	249123112	249123526	FALSE	TRUE	FALSE	Intergenic	Intergenic	2743	NR_036070	100422879		NR_036070	ENSG00000264500	MIR3124	mir-3124	microRNA 3124	ncRNA	3.01	23.7633	10.385	4.66333	3.105	3.51
Merged-chr10-758246-5	chr10	758034	758403	FALSE	TRUE	TRUE	Intergenic	Intergenic	-22610	NM_014974	22982	Hs.432397	NM_014974	ENSG00000151240	DIP2C	KIAA0934	disco interacting protein 2 homolog C	protein-coding	3.11	15.4067	10.425	2.61333	2.135	2.51
Merged-chr10-1009791-4	chr10	1009599	1009997	FALSE	FALSE	TRUE	Intergenic	MSTD|LTR|ERVL-MaLR	-24551	NM_012341	23560	Hs.215766	NM_012341	ENSG00000107937	GTPBP4	CRFG|NGB|NOG1	GTP binding protein 4	protein-coding	1.615	10.3567	8.77	1.36667	1.55	0.5
Merged-chr10-3133837-5	chr10	3133523	3134112	FALSE	TRUE	TRUE	intron (NM_002627, intron 2 of 21)	AluSz|SINE|Alu	-12984	NM_001323070	5214	Hs.26010	NM_002627	ENSG00000067057	PFKP	ATP-PFK|PFK-C|PFK-P|PFKF	phosphofructokinase, platelet	protein-coding	2.89	29.22	16.68	4.11	3.1	6.52
Merged-chr10-3408026-3	chr10	3407903	3408162	FALSE	TRUE	FALSE	intron (NR_131187, intron 1 of 1)	intron (NR_131187, intron 1 of 1)	47145	NR_131187	105376360	Hs.212226	NR_131187		LOC105376360	-	uncharacterized LOC105376360	ncRNA	3.26	13.48	8.205	3.17	2.52	1
Merged-chr10-3782844-5	chr10	3782652	3783033	FALSE	TRUE	TRUE	intron (NR_131187, intron 1 of 1)	MIR|SINE|MIR	44631	NM_001300	1316	Hs.4055	NM_001300	ENSG00000067082	KLF6	BCD1|CBA1|COPEB|CPBP|GBF|PAC1|ST12|ZF9	Kruppel like factor 6	protein-coding	4	42.6133	16.57	5.22333	3.49	1
Merged-chr10-3916202-3	chr10	3915933	3916412	FALSE	TRUE	FALSE	Intergenic	Intergenic	40030	NR_134490	105376365	Hs.460114	NR_134490	ENSG00000230573	LOC105376365	-	uncharacterized LOC105376365	ncRNA	1.945	14.7267	8.23	2.05	0.775	2
Merged-chr10-4315204-4	chr10	4315010	4315356	FALSE	FALSE	TRUE	Intergenic	Intergenic	-29079	NR_108040	100652988	Hs.433011	NR_108040		LINC00702	-	long intergenic non-protein coding RNA 702	ncRNA	1.245	9.03	10.335	1.25333	1.55	0.5
Merged-chr10-4562358-5	chr10	4562061	4562588	FALSE	TRUE	TRUE	Intergenic	Intergenic	113663	NR_108056	100507059	Hs.158438	NR_108054	ENSG00000224382	LINC00703	-	long intergenic non-protein coding RNA 703	ncRNA	3.195	27.8433	16.385	3.81667	2.715	1
Merged-chr10-4720040-4	chr10	4719705	4720587	FALSE	TRUE	FALSE	intron (NR_024475, intron 1 of 3)	intron (NR_024475, intron 1 of 3)	116	NR_024475	100216001	Hs.634869	NR_024475	ENSG00000231298	MANCR	LINC00704	mitotically associated long non coding RNA	ncRNA	6.825	44.6	24.16	9.06333	4.85	7.52
Merged-chr10-4749711-4	chr10	4749313	4750053	FALSE	TRUE	FALSE	Intergenic	Intergenic	-29421	NR_024475	100216001	Hs.634869	NR_024475	ENSG00000231298	MANCR	LINC00704	mitotically associated long non coding RNA	ncRNA	3.295	34.1633	16.435	4.78667	3.1	2
Merged-chr10-4768459-4	chr10	4768244	4768811	FALSE	TRUE	FALSE	Intergenic	Intergenic	-48265	NR_024475	100216001	Hs.634869	NR_024475	ENSG00000231298	MANCR	LINC00704	mitotically associated long non coding RNA	ncRNA	7.18	38.1267	12.085	7.67667	6.59	2.51
Merged-chr10-4775890-5	chr10	4775498	4776334	FALSE	TRUE	TRUE	Intergenic	ERVL-E-int|LTR|ERVL	-55654	NR_024475	100216001	Hs.634869	NR_024475	ENSG00000231298	MANCR	LINC00704	mitotically associated long non coding RNA	ncRNA	4.325	55.94	20.04	8.52333	2.91	6.01
Merged-chr10-4925738-5	chr10	4925461	4926008	FALSE	TRUE	TRUE	intron (NR_026743, intron 7 of 10)	intron (NR_026743, intron 7 of 10)	32731	NR_026743	389932	Hs.631812	NR_026743		AKR1C6P	TAKR	aldo-keto reductase family 1 member C6, pseudogene	pseudo	4.115	27.0467	13.53	4.80333	4.07	6.52
Merged-chr10-4982057-3	chr10	4981785	4982237	FALSE	TRUE	FALSE	Intergenic	Intergenic	-23443	NM_001353	1645	Hs.460260	NM_001353	ENSG00000187134	AKR1C1	2-ALPHA-HSD|20-ALPHA-HSD|C9|DD1|DD1/DD2|DDH|DDH1|H-37|HAKRC|HBAB|MBAB	aldo-keto reductase family 1 member C1	protein-coding	4.88	18.1733	4.44	3.96	5.04	3.51
Merged-chr10-4988715-4	chr10	4988540	4988900	FALSE	FALSE	TRUE	Intergenic	Intergenic	-16734	NM_001353	1645	Hs.460260	NM_001353	ENSG00000187134	AKR1C1	2-ALPHA-HSD|20-ALPHA-HSD|C9|DD1|DD1/DD2|DDH|DDH1|H-37|HAKRC|HBAB|MBAB	aldo-keto reductase family 1 member C1	protein-coding	2.47	18.6533	11.085	2.74333	2.135	2.51
Merged-chr10-5005319-5	chr10	5005082	5005770	FALSE	TRUE	TRUE	promoter-TSS (NM_001353)	promoter-TSS (NM_001353)	-28	NM_001353	1645	Hs.460260	NM_001353	ENSG00000187134	AKR1C1	2-ALPHA-HSD|20-ALPHA-HSD|C9|DD1|DD1/DD2|DDH|DDH1|H-37|HAKRC|HBAB|MBAB	aldo-keto reductase family 1 member C1	protein-coding	5.42	26.8333	12.965	2.31333	2.715	8.02
Merged-chr10-5051438-3	chr10	5051230	5051676	FALSE	TRUE	FALSE	intron (NM_001354, intron 1 of 10)	intron (NM_001354, intron 1 of 10)	-5247	NM_001135241	1646	Hs.460260	NM_001354	ENSG00000151632	AKR1C2	AKR1C-pseudo|BABP|DD|DD-2|DD/BABP|DD2|DDH2|HAKRD|HBAB|MCDR2|SRXY8|TDD	aldo-keto reductase family 1 member C2	protein-coding	2.605	24.83	10.79	4.94333	4.07	4.51
Merged-chr10-5090117-5	chr10	5089887	5090396	FALSE	TRUE	TRUE	promoter-TSS (NM_001253908)	promoter-TSS (NM_001253908)	-817	NM_001253908	8644	Hs.78183	NM_003739	ENSG00000196139	AKR1C3	DD3|DDX|HA1753|HAKRB|HAKRe|HSD17B5|PGFS|hluPGFS	aldo-keto reductase family 1 member C3	protein-coding	4.805	22.3633	17.29	3.14333	4.07	1.5
Merged-chr10-5276411-6	chr10	5275974	5276858	FALSE	TRUE	TRUE	Intergenic	Intergenic	36783	NR_149060	110806285		NR_149060	ENSG00000224034	LINC02561	-	long intergenic non-protein coding RNA 2561	ncRNA	9.42	52.54	28.2	6.31667	9.305	11.03
Merged-chr10-5721924-5	chr10	5721749	5722107	FALSE	TRUE	TRUE	Intergenic	L1M4b|LINE|L1	-4873	NM_001321783	54906	Hs.610717	NM_017782	ENSG00000108021	FAM208B	C10orf18|bA318E3.2	family with sequence similarity 208 member B	protein-coding	3.125	18.2633	10.29	2.73	0.97	2
Merged-chr10-5735241-5	chr10	5734788	5735680	FALSE	TRUE	TRUE	intron (NM_001321783, intron 1 of 21)	intron (NM_001321783, intron 1 of 21)	8433	NM_001321785	54906	Hs.610717	NM_017782	ENSG00000108021	FAM208B	C10orf18|bA318E3.2	family with sequence similarity 208 member B	protein-coding	9.305	50.9067	24.185	9.99	6.595	8.52
Merged-chr10-5836442-5	chr10	5836245	5836698	FALSE	TRUE	TRUE	intron (NM_001115156, intron 3 of 9)	MIR|SINE|MIR	19041	NM_001115156	2665	Hs.299055	NM_001494	ENSG00000057608	GDI2	HEL-S-46e|RABGDIB	GDP dissociation inhibitor 2	protein-coding	3.15	16.8567	11.425	1.92	2.715	2
Merged-chr10-5903080-4	chr10	5902794	5903302	FALSE	TRUE	FALSE	TTS (NM_019046)	TTS (NM_019046)	-28487	NM_001258452	84893	Hs.498543	NM_032807	ENSG00000134452	FBH1	FBXO18|Fbx18|hFBH1	F-box DNA helicase 1	protein-coding	3.53	13.95	12.56	3.44	2.13	2
Merged-chr10-7584584-5	chr10	7584141	7584897	FALSE	TRUE	TRUE	Intergenic	Intergenic	77117	NM_032817	80760	Hs.498586	NM_030569	ENSG00000123243	ITIH5	ITI-HC5|PP14776	inter-alpha-trypsin inhibitor heavy chain family member 5	protein-coding	7.1	49.04	27.83	5.07333	5.04	6.52
Merged-chr10-7706837-2	chr10	7706670	7707014	FALSE	FALSE	TRUE	intron (NM_001001851, intron 1 of 11)	MIR|SINE|MIR	2119	NM_030569	80760	Hs.498586	NM_030569	ENSG00000123243	ITIH5	ITI-HC5|PP14776	inter-alpha-trypsin inhibitor heavy chain family member 5	protein-coding	1.65	4.95	8.795	1.09667	0.585	1
Merged-chr10-7729005-7	chr10	7728468	7729497	FALSE	TRUE	TRUE	Intergenic	Intergenic	-16254	NM_002216	3698	Hs.75285	NM_002216	ENSG00000151655	ITIH2	H2P|SHAP	inter-alpha-trypsin inhibitor heavy chain 2	protein-coding	13.96	72.14	57.12	11.9567	10.855	10.02
Merged-chr10-7742739-3	chr10	7742187	7743000	FALSE	TRUE	FALSE	Intergenic	Intergenic	-2643	NM_002216	3698	Hs.75285	NM_002216	ENSG00000151655	ITIH2	H2P|SHAP	inter-alpha-trypsin inhibitor heavy chain 2	protein-coding	7.375	26.5567	9.84	6.29333	7.365	7.02
Merged-chr10-7744526-4	chr10	7744360	7744738	FALSE	FALSE	TRUE	promoter-TSS (NM_002216)	promoter-TSS (NM_002216)	-687	NM_002216	3698	Hs.75285	NM_002216	ENSG00000151655	ITIH2	H2P|SHAP	inter-alpha-trypsin inhibitor heavy chain 2	protein-coding	2.455	11.5867	11.675	2.73333	2.325	0.5
Merged-chr10-7749347-4	chr10	7749157	7749783	FALSE	TRUE	FALSE	intron (NM_002216, intron 3 of 20)	intron (NM_002216, intron 3 of 20)	4234	NM_002216	3698	Hs.75285	NM_002216	ENSG00000151655	ITIH2	H2P|SHAP	inter-alpha-trypsin inhibitor heavy chain 2	protein-coding	5.83	33.18	10.47	4.89667	6.395	5.01
Merged-chr10-7860125-4	chr10	7859948	7860334	FALSE	TRUE	FALSE	promoter-TSS (NM_031923)	promoter-TSS (NM_031923)	-326	NM_031923	83860	Hs.527688	NM_031923	ENSG00000165632	TAF3	TAF140|TAFII-140|TAFII140	TATA-box binding protein associated factor 3	protein-coding	4.255	15.0133	10.585	3.46333	3.49	4.01
Merged-chr10-9029873-4	chr10	9029732	9030066	FALSE	FALSE	TRUE	Intergenic	Intergenic	89947	NR_131944	105755953	Hs.564146	NR_131944	ENSG00000234752	LOC105755953	-	uncharacterized LOC105755953	ncRNA	0.775	7.42	7.525	1.50667	0.97	1.5
Merged-chr10-10819375-3	chr10	10819175	10819530	FALSE	FALSE	TRUE	intron (NM_001326317, intron 2 of 14)	L2c|LINE|L2	17525	NR_027082	207107	Hs.31562	NR_027082	ENSG00000225383	SFTA1P	SFTPF	surfactant associated 1, pseudogene	pseudo	1.245	5.44667	9.725	0.816667	1.36	0.5
Merged-chr10-11581527-5	chr10	11581236	11581933	FALSE	TRUE	TRUE	intron (NM_014688, intron 2 of 14)	intron (NM_014688, intron 2 of 14)	-7305	NM_001080491	9712	Hs.498661	NM_014688	ENSG00000148429	USP6NL	RNTRE|TRE2NL|USP6NL-IT1	USP6 N-terminal like	protein-coding	4	56.26	32.795	8.49	2.135	5.51
Merged-chr10-11644952-5	chr10	11644592	11645276	FALSE	TRUE	TRUE	intron (NM_014688, intron 1 of 14)	intron (NM_014688, intron 1 of 14)	8854	NR_125732	9712	Hs.498661	NM_014688	ENSG00000148429	USP6NL	RNTRE|TRE2NL|USP6NL-IT1	USP6 N-terminal like	protein-coding	4.945	43.3533	24.48	7.95	6.4	5.51
Merged-chr10-11660705-3	chr10	11660467	11660930	FALSE	TRUE	FALSE	Intergenic	AluSx3|SINE|Alu	-6910	NM_014688	9712	Hs.498661	NM_014688	ENSG00000148429	USP6NL	RNTRE|TRE2NL|USP6NL-IT1	USP6 N-terminal like	protein-coding	3.41	16.9533	7.84	3.43	3.295	3.01
Merged-chr10-11682389-5	chr10	11682200	11682576	FALSE	TRUE	TRUE	Intergenic	Intergenic	-28600	NM_014688	9712	Hs.498661	NM_014688	ENSG00000148429	USP6NL	RNTRE|TRE2NL|USP6NL-IT1	USP6 N-terminal like	protein-coding	7.4	42.83	16.385	4.11333	2.325	2.51
Merged-chr10-11802568-5	chr10	11802340	11802803	FALSE	TRUE	TRUE	intron (NM_024693, intron 4 of 4)	intron (NM_024693, intron 4 of 4)	18215	NM_024693	79746	Hs.22242	NM_024693	ENSG00000134463	ECHDC3	-	enoyl-CoA hydratase domain containing 3	protein-coding	4.625	19.9733	15.075	2.73667	2.71	4.01
Merged-chr10-11873646-6	chr10	11873100	11874502	TRUE	TRUE	TRUE	intron (NM_153256, intron 1 of 3)	intron (NM_153256, intron 1 of 3)	8404	NM_153256	254427	Hs.435775	NM_153256	ENSG00000148426	PROSER2	C10orf47	proline and serine rich 2	protein-coding	26.845	94.4467	69.25	15.08	11.435	13.03
Merged-chr10-12753036-4	chr10	12752821	12753230	FALSE	TRUE	FALSE	intron (NM_153498, intron 3 of 10)	intron (NM_153498, intron 3 of 10)	14327	NR_031752	100313841		NR_031752	ENSG00000221331	MIR548Q	-	microRNA 548q	ncRNA	0.96	17.82	10.585	2.33333	2.325	3.01
Merged-chr10-13178842-3	chr10	13178710	13179068	FALSE	FALSE	TRUE	3' UTR (NM_021980, exon 14 of 14)	3' UTR (NM_021980, exon 14 of 14)	-24665	NM_018518	55388	Hs.198363	NM_018518	ENSG00000065328	MCM10	CNA43|DNA43|PRO2249	minichromosome maintenance 10 replication initiation factor	protein-coding	2.385	5.86	10.13	1.1	1.55	1
Merged-chr10-13352865-4	chr10	13352501	13353259	FALSE	FALSE	TRUE	Intergenic	Intergenic	-10750	NM_001323082	5264	Hs.498732	NM_006214	ENSG00000107537	PHYH	LN1|LNAP1|PAHX|PHYH1|RD	phytanoyl-CoA 2-hydroxylase	protein-coding	3.33	31.4567	23.05	5.32	2.715	4.01
Merged-chr10-13457187-5	chr10	13456999	13457407	FALSE	TRUE	TRUE	Intergenic	Intergenic	-66905	NM_012247	22929	Hs.124027	NM_012247	ENSG00000086475	SEPHS1	SELD|SPS|SPS1	selenophosphate synthetase 1	protein-coding	2.525	12.2967	10.86	2.74667	5.235	3.51
Merged-chr10-13542335-5	chr10	13542012	13542549	FALSE	TRUE	TRUE	intron (NM_001100912, intron 1 of 7)	intron (NM_001100912, intron 1 of 7)	2696	NM_001100912	222389	Hs.498740	NM_152751	ENSG00000165626	BEND7	C10orf30	BEN domain containing 7	protein-coding	4.77	31.4967	15.075	6.04	2.91	4.01
Merged-chr10-14302424-3	chr10	14302260	14302638	FALSE	TRUE	FALSE	intron (NR_134578, intron 2 of 3)	intron (NR_134578, intron 2 of 3)	70434	NR_134578	55691	Hs.330463	NM_018027	ENSG00000151474	FRMD4A	CCAFCA|FRMD4|bA295P9.4	FERM domain containing 4A	protein-coding	2.235	13.9567	5.825	2.19333	1.745	1.5
Merged-chr10-14621599-4	chr10	14621388	14621809	FALSE	TRUE	FALSE	intron (NM_001282695, intron 2 of 5)	intron (NM_001282695, intron 2 of 5)	-7226	NM_001320735	83641	Hs.446315	NM_031453	ENSG00000065809	FAM107B	C10orf45|HITS	family with sequence similarity 107 member B	protein-coding	1.685	14.1967	7.275	2.47333	2.33	2
Merged-chr10-14644389-5	chr10	14644160	14644622	FALSE	TRUE	TRUE	intron (NM_001282695, intron 2 of 5)	intron (NM_001282695, intron 2 of 5)	2026	NM_001282697	83641	Hs.446315	NM_031453	ENSG00000065809	FAM107B	C10orf45|HITS	family with sequence similarity 107 member B	protein-coding	4.83	19.35	23.575	3.71333	4.455	3.01
Merged-chr10-14897673-2	chr10	14897577	14897779	FALSE	FALSE	TRUE	intron (NM_016299, intron 9 of 13)	intron (NM_016299, intron 9 of 13)	17519	NR_103464	51182	Hs.534169	NM_016299	ENSG00000187522	HSPA14	HSP70-4|HSP70L1	heat shock protein family A (Hsp70) member 14	protein-coding	0.555	2.56	6.665	0.546667	1.16	2
Merged-chr10-14987284-3	chr10	14987132	14987438	FALSE	FALSE	TRUE	intron (NM_001289078, intron 1 of 11)	AluSx|SINE|Alu	9146	NM_001033857	64421	Hs.655932	NM_022487	ENSG00000152457	DCLRE1C	A-SCID|DCLREC1C|RS-SCID|SCIDA|SNM1C	DNA cross-link repair 1C	protein-coding	1.795	5.08	8.14	0.54	1.355	0.5
Merged-chr10-15126635-5	chr10	15126275	15126847	FALSE	TRUE	TRUE	intron (NM_001039844, intron 1 of 3)	MER51A|LTR|ERV1	4214	NM_001039844	414149	Hs.644598	NM_001039844	ENSG00000176244	ACBD7	bA455B2.2	acyl-CoA binding domain containing 7	protein-coding	6.075	50.6133	22.595	5.63667	9.11	2.51
Merged-chr10-15222903-5	chr10	15222577	15223125	FALSE	TRUE	TRUE	Intergenic	Intergenic	-12142	NM_001308295	9397	Hs.60339	NM_004808	ENSG00000152465	NMT2	-	N-myristoyltransferase 2	protein-coding	4.105	29.1033	12.83	2.60333	2.13	2
Merged-chr10-15224667-4	chr10	15224386	15224945	FALSE	TRUE	FALSE	Intergenic	Intergenic	-13956	NM_001308295	9397	Hs.60339	NM_004808	ENSG00000152465	NMT2	-	N-myristoyltransferase 2	protein-coding	3.53	24.45	12.625	3.02333	2.325	2.51
Merged-chr10-15387075-5	chr10	15386813	15387466	FALSE	TRUE	TRUE	intron (NM_001010924, intron 1 of 7)	intron (NM_001010924, intron 1 of 7)	25919	NM_001010924	221061	Hs.66762	NM_001010924	ENSG00000148468	FAM171A1	C10orf38	family with sequence similarity 171 member A1	protein-coding	7.69	38.5467	24.005	4.91333	6.2	6.01
Merged-chr10-15745585-5	chr10	15745336	15745826	FALSE	TRUE	TRUE	intron (NM_003638, intron 2 of 29)	intron (NM_003638, intron 2 of 29)	16753	NM_001291494	8516	Hs.171311	NM_003638	ENSG00000077943	ITGA8	-	integrin subunit alpha 8	protein-coding	1.5	26.1933	13.755	2.45667	1.55	1.5
Merged-chr10-15831939-4	chr10	15831753	15832196	FALSE	FALSE	TRUE	intron (NM_024948, intron 11 of 14)	intron (NM_024948, intron 11 of 14)	-69640	NM_003638	8516	Hs.171311	NM_003638	ENSG00000077943	ITGA8	-	integrin subunit alpha 8	protein-coding	1.28	14.4867	11.375	2.86333	1.94	0.5
Merged-chr10-16158662-3	chr10	16158492	16158816	FALSE	TRUE	FALSE	Intergenic	Intergenic	-256122	NM_024948	80013	Hs.158870	NM_024948	ENSG00000148481	MINDY3	C10orf97|CARP|DERP5|FAM188A|MST126|MSTP126|my042	MINDY lysine 48 deubiquitinase 3	protein-coding	1.65	8.73333	4.605	1.65333	1.745	2
Merged-chr10-16481526-4	chr10	16481253	16481784	FALSE	TRUE	FALSE	intron (NM_001001484, intron 2 of 5)	intron (NM_001001484, intron 2 of 5)	2576	NM_030664	9317	Hs.444321	NM_030664	ENSG00000165983	PTER	HPHRP|RPR-1	phosphotriesterase related	protein-coding	3.195	17.97	8.91	2.19333	1.55	1.5
Merged-chr10-17117740-3	chr10	17117532	17118019	FALSE	TRUE	FALSE	intron (NM_001081, intron 17 of 66)	intron (NM_001081, intron 17 of 66)	54041	NM_001081	8029	Hs.166206	NM_001081	ENSG00000107611	CUBN	IFCR|MGA1|gp280	cubilin	protein-coding	0.995	13.62	3.695	1.22	2.33	2.51
Merged-chr10-19273721-4	chr10	19273571	19273893	FALSE	FALSE	TRUE	Intergenic	HAL1|LINE|L1	-63968	NM_001142308	340895	Hs.646734	NM_001142308	ENSG00000204740	MALRD1	C10orf112|DIET1|bA265G8.2	MAM and LDL receptor class A domain containing 1	protein-coding	1.06	7.56	6.665	1.93	1.745	2.51
Merged-chr10-19303087-5	chr10	19302838	19303336	FALSE	TRUE	TRUE	Intergenic	MER44D|DNA|TcMar-Tigger	-34613	NM_001142308	340895	Hs.646734	NM_001142308	ENSG00000204740	MALRD1	C10orf112|DIET1|bA265G8.2	MAM and LDL receptor class A domain containing 1	protein-coding	1.465	28.0833	15.165	2.32667	1.55	3.51
Merged-chr10-19835302-4	chr10	19835172	19835441	FALSE	FALSE	TRUE	intron (NM_001142308, intron 32 of 39)	intron (NM_001142308, intron 32 of 39)	182173	NR_120646	101928834	Hs.676482	NR_120646	ENSG00000233968	LOC101928834	-	uncharacterized LOC101928834	ncRNA	2.275	8.46	8.82	1.79	0.97	1.5
Merged-chr10-19859258-5	chr10	19859044	19859539	FALSE	TRUE	TRUE	intron (NM_001142308, intron 33 of 39)	intron (NM_001142308, intron 33 of 39)	158188	NR_120646	101928834	Hs.676482	NR_120646	ENSG00000233968	LOC101928834	-	uncharacterized LOC101928834	ncRNA	3.78	20.8767	12.015	2.34333	3.1	2
Merged-chr10-19945602-4	chr10	19945372	19945872	FALSE	TRUE	FALSE	intron (NM_001142308, intron 36 of 39)	intron (NM_001142308, intron 36 of 39)	71857	NR_120646	101928834	Hs.676482	NR_120646	ENSG00000233968	LOC101928834	-	uncharacterized LOC101928834	ncRNA	6.515	41.58	11.22	4.94333	3.105	3.51
Merged-chr10-19966633-3	chr10	19966460	19966806	FALSE	TRUE	FALSE	intron (NM_001142308, intron 36 of 39)	L1PA10|LINE|L1	50846	NR_120646	101928834	Hs.676482	NR_120646	ENSG00000233968	LOC101928834	-	uncharacterized LOC101928834	ncRNA	2.49	22.9967	9.09	2.21	1.165	1.5
Merged-chr10-20204266-5	chr10	20204101	20204471	FALSE	TRUE	TRUE	intron (NM_032812, intron 1 of 13)	L1MDa|LINE|L1	98914	NM_032812	84898	Hs.99472	NM_032812	ENSG00000120594	PLXDC2	TEM7R	plexin domain containing 2	protein-coding	2.155	12.14	16.795	2.33667	1.355	3.01
Merged-chr10-21386606-5	chr10	21386109	21387091	FALSE	TRUE	TRUE	intron (NM_213569, intron 2 of 6)	intron (NM_213569, intron 2 of 6)	48888	NM_001010896	387638	Hs.664110	NM_001010896	ENSG00000204683	C10orf113	bA165O3.1	chromosome 10 open reading frame 113	protein-coding	5.025	160.003	65.19	8.22333	5.43	8.02
Merged-chr10-21587254-3	chr10	21587113	21587385	FALSE	FALSE	TRUE	Intergenic	Intergenic	124018	NR_046284	100128511	Hs.635827	NR_046283	ENSG00000231920	NEBL-AS1	-	NEBL antisense RNA 1	ncRNA	1.5	6.13667	8.41	1.36	1.36	0
Merged-chr10-21785791-5	chr10	21785328	21786145	FALSE	TRUE	TRUE	promoter-TSS (NR_031736)	promoter-TSS (NR_031736)	-166	NR_031736	100302129		NR_031736	ENSG00000222071	MIR1915	MIRN1915|hsa-mir-1915	microRNA 1915	ncRNA	10.745	26.5267	19.445	7.26333	7.175	9.02
Merged-chr10-21813962-5	chr10	21813699	21814146	FALSE	TRUE	TRUE	intron (NM_207371, intron 1 of 3)	intron (NM_207371, intron 1 of 3)	689	NM_207371	387640	Hs.350848	NM_207371	ENSG00000180592	SKIDA1	C10orf140|DLN-1	SKI/DACH domain containing 1	protein-coding	6.885	23.5433	14.485	5.59333	6.205	4.51
Merged-chr10-21976778-4	chr10	21976601	21976941	FALSE	FALSE	TRUE	intron (NM_001324297, intron 15 of 24)	intron (NM_001324297, intron 15 of 24)	153197	NM_001195626	8028	Hs.30385	NM_004641	ENSG00000078403	MLLT10	AF10	MLLT10, histone lysine methyltransferase DOT1L cofactor	protein-coding	1.18	9.42333	14.55	1.77667	0.78	2
Merged-chr10-22658649-4	chr10	22658485	22658811	FALSE	TRUE	FALSE	intron (NM_012443, intron 4 of 10)	MIR|SINE|MIR	24274	NM_001253855	9576	Hs.655170	NM_012443	ENSG00000077327	SPAG6	CT141|Repro-SA-1|pf16	sperm associated antigen 6	protein-coding	1.87	19.0767	8.025	2.61667	0.78	4.01
Merged-chr10-22768470-4	chr10	22768303	22768617	FALSE	FALSE	TRUE	Intergenic	Intergenic	-41602	NR_036533	100499489	Hs.7444	NR_036533		LOC100499489	-	uncharacterized LOC100499489	ncRNA	0.96	6.35333	7.75	1.51	0.97	0.5
Merged-chr10-23007738-5	chr10	23007560	23007906	FALSE	TRUE	TRUE	Intergenic	Intergenic	-4230	NM_005028	5305	Hs.57079	NM_005028	ENSG00000150867	PIP4K2A	PI5P4KA|PIP5K2A|PIP5KII-alpha|PIP5KIIA|PIPK	phosphatidylinositol-5-phosphate 4-kinase type 2 alpha	protein-coding	4.325	19.7667	16.365	2.87	0.39	2
Merged-chr10-23106082-5	chr10	23105600	23106511	FALSE	TRUE	TRUE	Intergenic	Intergenic	-102552	NM_005028	5305	Hs.57079	NM_005028	ENSG00000150867	PIP4K2A	PI5P4KA|PIP5K2A|PIP5KII-alpha|PIP5KIIA|PIPK	phosphatidylinositol-5-phosphate 4-kinase type 2 alpha	protein-coding	3.04	47.1667	26.975	5.60667	2.715	5.51
Merged-chr10-23444302-3	chr10	23444041	23444562	FALSE	TRUE	FALSE	Intergenic	Intergenic	-37159	NM_178161	256297	Hs.351503	NM_178161	ENSG00000168267	PTF1A	PACA|PAGEN2|PTF1-p48|bHLHa29|p48	pancreas associated transcription factor 1a	protein-coding	2.385	14.5167	4.265	1.5	1.165	1.5
Merged-chr10-23801393-6	chr10	23800964	23801776	TRUE	TRUE	TRUE	Intergenic	MER44B|DNA|TcMar-Tigger	73172	NM_001145373	220213	Hs.499042	NM_001145373	ENSG00000165312	OTUD1	DUBA7|OTDC1	OTU deubiquitinase 1	protein-coding	7.795	59.5333	52.515	4.07667	2.71	4.51
Merged-chr10-24548493-4	chr10	24548357	24548634	FALSE	TRUE	FALSE	intron (NM_001098500, intron 3 of 18)	AluJr|SINE|Alu	-16119	NR_030334	693188		NR_030334	ENSG00000207930	MIR603	MIRN603|hsa-mir-603	microRNA 603	ncRNA	1.615	8.82	6.235	1.37	1.36	1
Merged-chr10-24970607-5	chr10	24970036	24971098	FALSE	TRUE	TRUE	intron (NM_020824, intron 2 of 25)	intron (NM_020824, intron 2 of 25)	42030	NM_020824	57584	Hs.524195	NM_020824	ENSG00000107863	ARHGAP21	ARHGAP10	Rho GTPase activating protein 21	protein-coding	9.555	64.3167	35.745	8.34	11.05	8.02
Merged-chr10-25007707-5	chr10	25007507	25008003	FALSE	TRUE	TRUE	intron (NM_020824, intron 2 of 25)	intron (NM_020824, intron 2 of 25)	4842	NM_020824	57584	Hs.524195	NM_020824	ENSG00000107863	ARHGAP21	ARHGAP10	Rho GTPase activating protein 21	protein-coding	4.425	29.48	17.495	5.49333	1.94	4.51
Merged-chr10-25353910-5	chr10	25353670	25354186	FALSE	TRUE	TRUE	Intergenic	AluSx1|SINE|Alu	-2720	NM_001270383	219670	Hs.534486	NM_145010	ENSG00000151023	ENKUR	C10orf63|CFAP106	enkurin, TRPC channel interacting protein	protein-coding	0.995	20.4367	9.475	3.69667	2.715	3.01
Merged-chr10-26042811-5	chr10	26042607	26043017	FALSE	TRUE	TRUE	Intergenic	Intergenic	102171	NR_108067	101929052	Hs.128298	NR_108067	ENSG00000280809	LINC00836	-	long intergenic non-protein coding RNA 836	ncRNA	1.21	12.4533	12.105	1.64	1.55	0.5
Merged-chr10-26156429-3	chr10	26156215	26156606	FALSE	TRUE	FALSE	Intergenic	Intergenic	66229	NR_120650	101929073	Hs.409816	NR_120650	ENSG00000226304	LOC101929073	-	uncharacterized LOC101929073	ncRNA	0.96	26.7767	6.685	1.24333	2.325	2
Merged-chr10-27027386-4	chr10	27027141	27027565	FALSE	FALSE	TRUE	intron (NM_014317, intron 10 of 11)	intron (NM_014317, intron 10 of 11)	41000	NM_014317	23590	Hs.558468	NM_014317	ENSG00000148459	PDSS1	COQ1|COQ10D2|DPS|SPS|TPRT|TPT|TPT 1|hDPS1	decaprenyl diphosphate synthase subunit 1	protein-coding	4.255	9.82667	9.18	1.78	2.33	1
Merged-chr10-28031449-5	chr10	28031181	28031784	FALSE	TRUE	TRUE	intron (NM_173576, intron 2 of 6)	CpG-2675	-2062	NR_121652	101929202	Hs.568843	NR_121652		MKX-AS1	-	MKX antisense RNA 1	ncRNA	4.61	51.3067	39.96	3.29	4.265	5.01
Merged-chr10-28669377-5	chr10	28669157	28669559	FALSE	TRUE	TRUE	Intergenic	L1MB4|LINE|L1	-77363	NR_134518	143098	Hs.499159	NM_173496	ENSG00000150054	MPP7	-	membrane palmitoylated protein 7	protein-coding	3.185	20.91	10.155	2.89333	1.55	2.51
Merged-chr10-28858827-3	chr10	28858703	28858981	FALSE	TRUE	FALSE	intron (NM_016628, intron 3 of 13)	intron (NM_016628, intron 3 of 13)	36421	NM_100486	51322	Hs.743224	NM_016628	ENSG00000095787	WAC	BM-016|DESSH|PRO1741|Wwp4	WW domain containing adaptor with coiled-coil	protein-coding	1.615	9.13667	3.215	1.51	2.135	2.51
Merged-chr10-28917630-6	chr10	28917246	28918200	FALSE	TRUE	TRUE	Intergenic	Intergenic	-48701	NM_012342	25805	Hs.533336	NM_012342	ENSG00000095739	BAMBI	NMA	BMP and activin membrane bound inhibitor	protein-coding	4.33	35.1767	18.88	9.14667	4.46	7.52
Merged-chr10-29000951-5	chr10	29000774	29001144	FALSE	TRUE	TRUE	Intergenic	AluJr4|SINE|Alu	-31620	NR_120652	101929218	Hs.224866	NR_120652		LINC01517	-	long intergenic non-protein coding RNA 1517	ncRNA	2.2	15.76	7.73	1.91667	2.905	5.01
Merged-chr10-29161900-4	chr10	29161734	29162048	FALSE	FALSE	TRUE	intron (NM_001278522, intron 3 of 4)	intron (NM_001278522, intron 3 of 4)	26554	NM_001278522	283080		NM_001278522		C10orf126	bA492M23.1	chromosome 10 open reading frame 126	protein-coding	2.855	17.5933	12.125	1.62667	1.36	1
Merged-chr10-29187274-5	chr10	29186990	29187582	FALSE	TRUE	TRUE	Intergenic	Intergenic	51949	NM_001278522	283080		NM_001278522		C10orf126	bA492M23.1	chromosome 10 open reading frame 126	protein-coding	5.2	34.6933	20.195	2.73	2.52	1.5
Merged-chr10-29231123-5	chr10	29230856	29231349	FALSE	TRUE	TRUE	Intergenic	L1MD2|LINE|L1	95765	NM_001278522	283080		NM_001278522		C10orf126	bA492M23.1	chromosome 10 open reading frame 126	protein-coding	4.76	26.1233	18.835	2.62667	3.49	2.51
Merged-chr10-29238187-6	chr10	29237506	29238758	TRUE	TRUE	TRUE	Intergenic	MIRb|SINE|MIR	102795	NM_001278522	283080		NM_001278522		C10orf126	bA492M23.1	chromosome 10 open reading frame 126	protein-coding	20.325	109.003	76.02	10.56	10.08	13.53
Merged-chr10-29322476-5	chr10	29322280	29322656	FALSE	TRUE	TRUE	Intergenic	Intergenic	187131	NM_001278522	283080		NM_001278522		C10orf126	bA492M23.1	chromosome 10 open reading frame 126	protein-coding	3.195	23.39	13.375	4.13667	3.88	3.51
Merged-chr10-29353521-5	chr10	29353319	29353746	FALSE	TRUE	TRUE	Intergenic	Intergenic	218195	NM_001278522	283080		NM_001278522		C10orf126	bA492M23.1	chromosome 10 open reading frame 126	protein-coding	3.41	28.24	18.765	3.99	4.655	4.51
Merged-chr10-29609951-4	chr10	29609753	29610104	FALSE	FALSE	TRUE	Intergenic	Intergenic	31938	NM_032517	84569	Hs.558572	NM_032517	ENSG00000120563	LYZL1	KAAG648|LYC2|LYZD1|PRO1278|bA534G20.1	lysozyme like 1	protein-coding	1.025	12.5267	11.13	2.20333	1.745	1.5
Merged-chr10-29735471-4	chr10	29735251	29735655	FALSE	TRUE	FALSE	intron (NR_110927, intron 2 of 2)	intron (NR_110927, intron 2 of 2)	36281	NR_110928	102724316	Hs.499209	NR_003930	ENSG00000224597	SVIL-AS1	-	SVIL antisense RNA 1	ncRNA	2.385	15.1467	8.41	1.77333	1.935	2.51
Merged-chr10-29907657-3	chr10	29907509	29907784	FALSE	TRUE	FALSE	intron (NM_001323600, intron 3 of 36)	intron (NM_001323600, intron 3 of 36)	16255	NM_021738	6840	Hs.499209	NM_003174	ENSG00000197321	SVIL	-	supervillin	protein-coding	2.49	18.42	7.525	2.74333	2.52	3.51
Merged-chr10-29912911-4	chr10	29912712	29913075	FALSE	TRUE	FALSE	intron (NM_001323600, intron 3 of 36)	Tigger3c|DNA|TcMar-Tigger	11008	NM_021738	6840	Hs.499209	NM_003174	ENSG00000197321	SVIL	-	supervillin	protein-coding	2.64	23.5167	11.015	3.14333	1.935	3.51
Merged-chr10-29916970-6	chr10	29916653	29917252	TRUE	TRUE	TRUE	intron (NM_001323600, intron 3 of 36)	intron (NM_001323600, intron 3 of 36)	6949	NM_021738	6840	Hs.499209	NM_003174	ENSG00000197321	SVIL	-	supervillin	protein-coding	7.285	43.2467	34.405	4.39667	3.295	3.01
Merged-chr10-30780250-3	chr10	30779997	30780422	FALSE	TRUE	FALSE	Intergenic	Intergenic	56645	NM_001320961	1326	Hs.432453	NM_005204	ENSG00000107968	MAP3K8	AURA2|COT|EST|ESTF|MEKK8|TPL2|Tpl-2|c-COT	mitogen-activated protein kinase kinase kinase 8	protein-coding	1.43	17.5	5.35	4.25333	1.55	5.01
Merged-chr10-30782507-5	chr10	30781924	30783029	FALSE	TRUE	TRUE	Intergenic	Intergenic	58912	NM_001320961	1326	Hs.432453	NM_005204	ENSG00000107968	MAP3K8	AURA2|COT|EST|ESTF|MEKK8|TPL2|Tpl-2|c-COT	mitogen-activated protein kinase kinase kinase 8	protein-coding	6.05	64.8767	30.035	9.58333	9.5	6.52
Merged-chr10-30793059-5	chr10	30792589	30793567	FALSE	TRUE	TRUE	Intergenic	L2|LINE|L2	69514	NM_001320961	1326	Hs.432453	NM_005204	ENSG00000107968	MAP3K8	AURA2|COT|EST|ESTF|MEKK8|TPL2|Tpl-2|c-COT	mitogen-activated protein kinase kinase kinase 8	protein-coding	12.45	66.9467	46.305	8.89	6.005	8.52
Merged-chr10-30896285-5	chr10	30896133	30896479	FALSE	TRUE	TRUE	Intergenic	Intergenic	22341	NM_183058	119180	Hs.522610	NM_183058	ENSG00000151033	LYZL2	LYZD2	lysozyme like 2	protein-coding	2.67	14.1967	13.01	2.32667	1.55	3.01
Merged-chr10-30927659-3	chr10	30927487	30927795	FALSE	FALSE	TRUE	Intergenic	Intergenic	-8994	NM_183058	119180	Hs.522610	NM_183058	ENSG00000151033	LYZL2	LYZD2	lysozyme like 2	protein-coding	2.2	7.31	11.785	2.19333	1.55	2
Merged-chr10-31746900-3	chr10	31746773	31747042	FALSE	FALSE	TRUE	intron (NM_001323664, intron 3 of 10)	Charlie20a|DNA|hAT-Charlie	136357	NM_001323675	6935	Hs.124503	NM_030751	ENSG00000148516	ZEB1	AREB6|BZP|DELTAEF1|FECD6|NIL2A|PPCD3|TCF8|ZFHEP|ZFHX1A	zinc finger E-box binding homeobox 1	protein-coding	1.835	5.41	10.52	0.96	0.195	1
Merged-chr10-32156769-5	chr10	32156536	32157031	FALSE	TRUE	TRUE	intron (NM_001270697, intron 3 of 18)	L1M5|LINE|L1	41071	NM_001270699	94134	Hs.499264	NM_018287	ENSG00000165322	ARHGAP12	-	Rho GTPase activating protein 12	protein-coding	2.79	23.3867	13.035	3.82333	3.49	5.01
Merged-chr10-32232001-4	chr10	32231772	32232213	FALSE	TRUE	FALSE	Intergenic	Intergenic	-14188	NM_001270698	94134	Hs.499264	NM_018287	ENSG00000165322	ARHGAP12	-	Rho GTPase activating protein 12	protein-coding	3.75	28.4333	13.01	5.47667	3.685	1
Merged-chr10-32267001-4	chr10	32266828	32267200	FALSE	TRUE	FALSE	Intergenic	CR1_Mam|LINE|CR1	-49210	NM_001270698	94134	Hs.499264	NM_018287	ENSG00000165322	ARHGAP12	-	Rho GTPase activating protein 12	protein-coding	2.67	15.1233	8.365	2.47	1.94	2.51
Merged-chr10-32384483-4	chr10	32384169	32384767	FALSE	FALSE	TRUE	Intergenic	FRAM|SINE|Alu	-39097	NM_004521	3799	Hs.327736	NM_004521	ENSG00000170759	KIF5B	HEL-S-61|KINH|KNS|KNS1|UKHC	kinesin family member 5B	protein-coding	4.025	17.1067	18.475	3.69333	5.815	2.51
Merged-chr10-32393651-3	chr10	32393475	32393820	FALSE	TRUE	FALSE	Intergenic	Intergenic	-48276	NM_004521	3799	Hs.327736	NM_004521	ENSG00000170759	KIF5B	HEL-S-61|KINH|KNS|KNS1|UKHC	kinesin family member 5B	protein-coding	2.755	18.13	7.75	3.41667	2.905	2.51
Merged-chr10-32445266-4	chr10	32445138	32445396	FALSE	FALSE	TRUE	Intergenic	Intergenic	-99896	NM_004521	3799	Hs.327736	NM_004521	ENSG00000170759	KIF5B	HEL-S-61|KINH|KNS|KNS1|UKHC	kinesin family member 5B	protein-coding	2.375	10.2133	10.925	2.19667	2.33	1.5
Merged-chr10-32663759-4	chr10	32663595	32663929	FALSE	FALSE	TRUE	TTS (NR_104163)	TTS (NR_104163)	3964	NM_001282391	80314	Hs.167805	NM_025209	ENSG00000120616	EPC1	Epl1	enhancer of polycomb homolog 1	protein-coding	3.77	19.0133	16.66	1.64333	2.325	2
Merged-chr10-32665114-4	chr10	32664929	32665293	FALSE	TRUE	FALSE	intron (NM_001282391, intron 1 of 13)	intron (NM_001282391, intron 1 of 13)	2615	NM_001282391	80314	Hs.167805	NM_025209	ENSG00000120616	EPC1	Epl1	enhancer of polycomb homolog 1	protein-coding	2.13	18.9933	12.015	2.73667	2.13	2
Merged-chr10-32673867-3	chr10	32673605	32674219	FALSE	TRUE	FALSE	Intergenic	L1PA17|LINE|L1	-6186	NM_001282391	80314	Hs.167805	NM_025209	ENSG00000120616	EPC1	Epl1	enhancer of polycomb homolog 1	protein-coding	2.93	14.75	7.025	2.47667	2.715	3.51
Merged-chr10-33237622-5	chr10	33237380	33237834	FALSE	TRUE	TRUE	intron (NM_002211, intron 1 of 15)	MSTD|LTR|ERVL-MaLR	9215	NM_133376	3688	Hs.643813	NM_002211	ENSG00000150093	ITGB1	CD29|FNRB|GPIIA|MDF2|MSK12|VLA-BETA|VLAB	integrin subunit beta 1	protein-coding	3.55	26.8133	19.515	2.72667	1.94	3.51
Merged-chr10-33274778-4	chr10	33274370	33275147	FALSE	FALSE	TRUE	Intergenic	Intergenic	-27465	NM_002211	3688	Hs.643813	NM_002211	ENSG00000150093	ITGB1	CD29|FNRB|GPIIA|MDF2|MSK12|VLA-BETA|VLAB	integrin subunit beta 1	protein-coding	5.43	34.11	24.615	5.88	5.04	4.51
Merged-chr10-33445167-5	chr10	33444955	33445428	FALSE	TRUE	TRUE	Intergenic	Intergenic	178642	NM_001330068	8829	Hs.131704	NM_003873	ENSG00000099250	NRP1	BDCA4|CD304|NP1|NRP|VEGF165R	neuropilin 1	protein-coding	3.225	42.7533	17.455	5.77	5.43	3.51
Merged-chr10-33446287-5	chr10	33446117	33446434	FALSE	TRUE	TRUE	Intergenic	Intergenic	177558	NM_001330068	8829	Hs.131704	NM_003873	ENSG00000099250	NRP1	BDCA4|CD304|NP1|NRP|VEGF165R	neuropilin 1	protein-coding	2.09	12.45	15.075	1.24333	1.745	1
Merged-chr10-33484674-3	chr10	33484439	33484908	FALSE	TRUE	FALSE	intron (NM_001330068, intron 12 of 15)	intron (NM_001330068, intron 12 of 15)	139160	NM_001330068	8829	Hs.131704	NM_003873	ENSG00000099250	NRP1	BDCA4|CD304|NP1|NRP|VEGF165R	neuropilin 1	protein-coding	3.885	30.36	10.81	5.62667	4.075	5.01
Merged-chr10-33605058-5	chr10	33604732	33605325	FALSE	TRUE	TRUE	intron (NM_001024628, intron 2 of 11)	intron (NM_001024628, intron 2 of 11)	18805	NM_001330068	8829	Hs.131704	NM_003873	ENSG00000099250	NRP1	BDCA4|CD304|NP1|NRP|VEGF165R	neuropilin 1	protein-coding	6.995	23.45	28.74	3.83333	2.52	0.5
Merged-chr10-33654938-4	chr10	33654573	33655315	FALSE	TRUE	FALSE	Intergenic	LTR26|LTR|ERV1	-31111	NM_001244973	8829	Hs.131704	NM_003873	ENSG00000099250	NRP1	BDCA4|CD304|NP1|NRP|VEGF165R	neuropilin 1	protein-coding	2.855	42.06	11.56	4.36667	2.905	6.01
Merged-chr10-33773906-5	chr10	33773691	33774169	FALSE	TRUE	TRUE	Intergenic	Intergenic	-150097	NM_001244973	8829	Hs.131704	NM_003873	ENSG00000099250	NRP1	BDCA4|CD304|NP1|NRP|VEGF165R	neuropilin 1	protein-coding	3.955	20.1233	15.05	2.47333	2.52	3.51
Merged-chr10-33797063-3	chr10	33796829	33797273	FALSE	TRUE	FALSE	Intergenic	Intergenic	-173218	NM_001244973	8829	Hs.131704	NM_003873	ENSG00000099250	NRP1	BDCA4|CD304|NP1|NRP|VEGF165R	neuropilin 1	protein-coding	4.645	41.0467	10.065	5.36667	6.4	2.51
Merged-chr10-33860835-5	chr10	33860536	33861158	FALSE	TRUE	TRUE	Intergenic	Intergenic	200761	NR_038932	100505583	Hs.568804	NR_038932	ENSG00000261683	LINC00838	-	long intergenic non-protein coding RNA 838	ncRNA	3.01	35.6367	15.21	4.38333	2.33	3.01
Merged-chr10-34165655-3	chr10	34165371	34165874	FALSE	TRUE	FALSE	Intergenic	Intergenic	-104014	NR_038932	100505583	Hs.568804	NR_038932	ENSG00000261683	LINC00838	-	long intergenic non-protein coding RNA 838	ncRNA	7.91	29.1433	8.545	4.91333	3.875	4.51
Merged-chr10-34275641-4	chr10	34275491	34275849	FALSE	FALSE	TRUE	Intergenic	Intergenic	-214062	NR_038932	100505583	Hs.568804	NR_038932	ENSG00000261683	LINC00838	-	long intergenic non-protein coding RNA 838	ncRNA	3.885	12.3433	9.225	3.01333	2.325	3.51
Merged-chr10-34410335-4	chr10	34410120	34410525	FALSE	TRUE	FALSE	intron (NM_019619, intron 23 of 24)	intron (NM_019619, intron 23 of 24)	-348714	NR_038932	100505583	Hs.568804	NR_038932	ENSG00000261683	LINC00838	-	long intergenic non-protein coding RNA 838	ncRNA	9.555	28.6367	13.985	3.41333	5.815	2.51
Merged-chr10-34465584-5	chr10	34465237	34465880	FALSE	TRUE	TRUE	intron (NM_019619, intron 22 of 24)	intron (NM_019619, intron 22 of 24)	-403950	NR_038932	100505583	Hs.568804	NR_038932	ENSG00000261683	LINC00838	-	long intergenic non-protein coding RNA 838	ncRNA	4.325	44.88	27.22	4.51333	4.075	7.52
Merged-chr10-34520513-4	chr10	34520242	34520903	FALSE	FALSE	TRUE	intron (NM_019619, intron 22 of 24)	intron (NM_019619, intron 22 of 24)	-458964	NR_038932	100505583	Hs.568804	NR_038932	ENSG00000261683	LINC00838	-	long intergenic non-protein coding RNA 838	ncRNA	8.645	27.5033	17.29	7.39333	7.175	3.01
Merged-chr10-34763163-3	chr10	34762992	34763299	FALSE	TRUE	FALSE	intron (NM_019619, intron 3 of 24)	intron (NM_019619, intron 3 of 24)	341108	NM_001184791	56288	Hs.131489	NM_019619	ENSG00000148498	PARD3	ASIP|Baz|PAR3|PAR3alpha|PARD-3|PARD3A|PPP1R118|SE2-5L16|SE2-5LT1|SE2-5T2	par-3 family cell polarity regulator	protein-coding	2.385	21.3667	9.27	3.15	2.905	1.5
Merged-chr10-35148639-4	chr10	35148428	35148980	FALSE	TRUE	FALSE	Intergenic	MIR|SINE|MIR	44008	NR_108043	100505601	Hs.549790	NR_108043	ENSG00000226386	PARD3-AS1	-	PARD3 antisense RNA 1	ncRNA	3.075	20.4633	10.355	3.32333	1.555	1.5
Merged-chr10-35368964-4	chr10	35368713	35369338	FALSE	FALSE	TRUE	promoter-TSS (NR_037405)	promoter-TSS (NR_037405)	-417	NR_037405	100500890		NR_037405	ENSG00000266228	MIR3611	-	microRNA 3611	ncRNA	3.565	19.4567	14.005	2.28667	3.49	4.01
Merged-chr10-35526923-6	chr10	35526547	35527283	TRUE	TRUE	TRUE	Intergenic	AluSz6|SINE|Alu	-8994	NM_181698	219771	Hs.14745	NM_145012	ENSG00000108100	CCNY	C10orf9|CBCP1|CCNX|CFP1	cyclin Y	protein-coding	12.85	61.6367	46.465	6.47333	3.68	8.52
Merged-chr10-35556836-5	chr10	35556542	35557092	FALSE	TRUE	TRUE	intron (NM_181698, intron 3 of 11)	intron (NM_181698, intron 3 of 11)	20908	NM_181698	219771	Hs.14745	NM_145012	ENSG00000108100	CCNY	C10orf9|CBCP1|CCNX|CFP1	cyclin Y	protein-coding	3.63	19.6967	19.22	3.3	6.2	3.51
Merged-chr10-35596187-3	chr10	35595878	35596500	FALSE	TRUE	FALSE	intron (NM_181698, intron 3 of 11)	intron (NM_181698, intron 3 of 11)	-29613	NM_145012	219771	Hs.14745	NM_145012	ENSG00000108100	CCNY	C10orf9|CBCP1|CCNX|CFP1	cyclin Y	protein-coding	2.13	20.53	11.99	4.15333	3.49	6.52
Merged-chr10-35621354-6	chr10	35620933	35621694	TRUE	TRUE	TRUE	intron (NM_181698, intron 3 of 11)	intron (NM_181698, intron 3 of 11)	-4489	NM_145012	219771	Hs.14745	NM_145012	ENSG00000108100	CCNY	C10orf9|CBCP1|CCNX|CFP1	cyclin Y	protein-coding	11.745	74.95	54.92	7.29333	5.62	6.01
Merged-chr10-35831540-5	chr10	35831089	35831896	FALSE	TRUE	TRUE	intron (NM_145012, intron 7 of 9)	intron (NM_145012, intron 7 of 9)	-62846	NM_153368	219770	Hs.638922	NM_153368	ENSG00000177291	GJD4	CX40.1	gap junction protein delta 4	protein-coding	5.94	52.68	38.1	7.82	4.265	5.01
Merged-chr10-36540107-5	chr10	36539806	36540275	FALSE	TRUE	TRUE	Intergenic	HAL1|LINE|L1	472810	NR_110138	102578074		NR_110138	ENSG00000280719	PCAT5	LINC01452|TPCAT-10-36067	prostate cancer associated transcript 5 (non-protein coding)	ncRNA	4.29	13.9933	7.705	1.36667	1.55	0.5
Merged-chr10-37261304-3	chr10	37261143	37261441	FALSE	FALSE	TRUE	Intergenic	Intergenic	-153493	NM_052997	91074	Hs.373787	NM_052997	ENSG00000148513	ANKRD30A	NY-BR-1	ankyrin repeat domain 30A	protein-coding	2.79	4.77	11.29	1.37667	1.355	0
Merged-chr10-38155328-4	chr10	38155093	38155599	FALSE	TRUE	FALSE	Intergenic	Intergenic	-8334	NR_147991	57209	Hs.528423	NM_021045	ENSG00000198105	ZNF248	bA162G10.3	zinc finger protein 248	protein-coding	3.77	25.2933	13.24	3.29333	4.07	7.02
Merged-chr10-38157925-4	chr10	38157780	38158058	FALSE	FALSE	TRUE	Intergenic	L1MB5|LINE|L1	-10907	NR_147991	57209	Hs.528423	NM_021045	ENSG00000198105	ZNF248	bA162G10.3	zinc finger protein 248	protein-coding	1.245	8.58333	8.18	1.37333	1.55	1
Merged-chr10-38343493-5	chr10	38343217	38343767	FALSE	TRUE	TRUE	exon (NM_001324175, exon 6 of 6)	exon (NM_001324175, exon 6 of 6)	-39772	NM_001324262	7587	Hs.292575	NM_003421	ENSG00000075407	ZNF37A	KOX21|ZNF37	zinc finger protein 37A	protein-coding	2.67	25.85	15.71	2.2	0.585	4.01
Merged-chr10-39038461-6	chr10	39037408	39039591	FALSE	FALSE	TRUE	Intergenic	(AAATG)n|Simple_repeat|Simple_repeat	48772	NR_045000	399746	Hs.742607	NR_045000		ACTR3BP5	FKSG74	ACTR3B pseudogene 5	pseudo	10.155	53.27	41.73	6.79	7.755	5.01
Merged-chr10-42641766-5	chr10	42641461	42642090	FALSE	TRUE	TRUE	Intergenic	(CATTT)n|Simple_repeat|Simple_repeat	221718	NR_024380	441666	Hs.255729	NR_024380	ENSG00000215146	LOC441666	-	zinc finger protein 91 pseudogene	pseudo	6.74	61.8567	53.015	5.22	4.65	5.51
Merged-chr10-42723277-6	chr10	42722582	42724038	FALSE	FALSE	TRUE	Intergenic	(CATCT)n|Simple_repeat|Simple_repeat	140183	NR_024380	441666	Hs.255729	NR_024380	ENSG00000215146	LOC441666	-	zinc finger protein 91 pseudogene	pseudo	5.315	30.2133	22.165	3.95667	4.655	7.02
Merged-chr10-42896440-3	chr10	42896318	42896568	FALSE	FALSE	TRUE	Intergenic	Intergenic	-32950	NR_024380	441666	Hs.255729	NR_024380	ENSG00000215146	LOC441666	-	zinc finger protein 91 pseudogene	pseudo	0.96	5.40333	5.85	1.09333	0.775	0
Merged-chr10-43018708-3	chr10	43018596	43018838	FALSE	FALSE	TRUE	non-coding (NR_026777, exon 7 of 8)	non-coding (NR_026777, exon 7 of 8)	29601	NR_026777	100129482	Hs.278064	NR_026777	ENSG00000234420	ZNF37BP	KOX21|ZNF37B	zinc finger protein 37B, pseudogene	pseudo	1.025	4.50667	7.615	0.543333	0.39	0
Merged-chr10-43093101-2	chr10	43092990	43093198	FALSE	FALSE	TRUE	intron (NM_006955, intron 4 of 4)	MER45R|DNA|hAT-Tip100	41191	NM_001305038	7582	Hs.435774	NM_006955	ENSG00000196693	ZNF33B	KOX2|KOX31|ZNF11B	zinc finger protein 33B	protein-coding	1.545	3.11667	6.915	0.816667	0.585	0.5
Merged-chr10-43876433-5	chr10	43876183	43876730	FALSE	TRUE	TRUE	Intergenic	L1MD2|LINE|L1	9364	NM_173160	53828	Hs.130497	NM_173160	ENSG00000150201	FXYD4	CHIF	FXYD domain containing ion transport regulator 4	protein-coding	2.975	35.1833	25.11	4.24667	1.745	4.51
Merged-chr10-44621996-5	chr10	44621628	44622265	FALSE	TRUE	TRUE	Intergenic	Intergenic	-166252	NM_001258000	100130539	Hs.694626	NM_001258000	ENSG00000277288	C10orf142	-	chromosome 10 open reading frame 142	protein-coding	5.79	29.14	20.285	3.55	2.52	5.01
Merged-chr10-44741180-6	chr10	44740913	44741486	TRUE	TRUE	TRUE	Intergenic	Intergenic	-46999	NM_001258000	100130539	Hs.694626	NM_001258000	ENSG00000277288	C10orf142	-	chromosome 10 open reading frame 142	protein-coding	12.67	81.75	54.31	5.20333	5.235	4.01
Merged-chr10-44882319-5	chr10	44882129	44882616	FALSE	TRUE	TRUE	Intergenic	CpG-2763	-1827	NM_001033886	6387	Hs.522891	NM_000609	ENSG00000107562	CXCL12	IRH|PBSF|SCYB12|SDF1|TLSF|TPAR1	C-X-C motif chemokine ligand 12	protein-coding	3.445	17.6167	13.465	3.13667	3.1	1.5
Merged-chr10-45485821-6	chr10	45485625	45486107	TRUE	TRUE	TRUE	intron (NM_032023, intron 8 of 10)	MER34A1|LTR|ERV1	-10407	NM_006963	7570	Hs.462693	NM_006963	ENSG00000165512	ZNF22	HKR-T1|KOX15|ZNF422|Zfp422	zinc finger protein 22	protein-coding	8.6	26.5067	15.435	3.99	3.685	3.51
Merged-chr10-45489823-4	chr10	45489594	45490074	FALSE	TRUE	FALSE	3' UTR (NM_032023, exon 11 of 11)	3' UTR (NM_032023, exon 11 of 11)	-6439	NM_006963	7570	Hs.462693	NM_006963	ENSG00000165512	ZNF22	HKR-T1|KOX15|ZNF422|Zfp422	zinc finger protein 22	protein-coding	3.04	27.37	11.085	3.03667	0.97	2
Merged-chr10-45966265-5	chr10	45965903	45966573	FALSE	TRUE	TRUE	intron (NM_001002266, intron 3 of 6)	intron (NM_001002266, intron 3 of 6)	-17669	NR_120674	102724323	Hs.559151	NR_120674	ENSG00000231964	LOC102724323	-	uncharacterized LOC102724323	ncRNA	6.235	51.6867	25.48	6.46667	5.62	4.01
Merged-chr10-47019180-5	chr10	47018884	47019499	FALSE	TRUE	TRUE	Intergenic	L1MD1|LINE|L1	25645	NM_014696	9721	Hs.523375	NM_014696	ENSG00000204175	GPRIN2	GRIN2|KIAA0514	G protein regulated inducer of neurite outgrowth 2	protein-coding	4.145	44.57	21.305	8.07667	4.265	5.51
Merged-chr10-47034242-3	chr10	47034101	47034380	FALSE	FALSE	TRUE	Intergenic	AluSq2|SINE|Alu	40694	NM_014696	9721	Hs.523375	NM_014696	ENSG00000204175	GPRIN2	GRIN2|KIAA0514	G protein regulated inducer of neurite outgrowth 2	protein-coding	2.09	5.70667	9.315	0.966667	1.94	2
Merged-chr10-48571870-4	chr10	48571722	48572095	FALSE	FALSE	TRUE	Intergenic	AluY|SINE|Alu	-132770	NM_004962	2662	Hs.2171	NM_004962	ENSG00000266524	GDF10	BIP|BMP-3b|BMP3B	growth differentiation factor 10	protein-coding	1.395	14.4733	10.56	2.59667	0.97	1
Merged-chr10-49540447-4	chr10	49540078	49540782	FALSE	FALSE	TRUE	intron (NM_001323302, intron 3 of 13)	HERVP71A-int|LTR|ERV1	25748	NM_001323321	5599	Hs.138211	NM_002750	ENSG00000107643	MAPK8	JNK|JNK-46|JNK1|JNK1A2|JNK21B1/2|PRKM8|SAPK1|SAPK1c	mitogen-activated protein kinase 8	protein-coding	4.845	28.5367	25.43	4.08	3.295	2.51
Merged-chr10-51362218-5	chr10	51362060	51362378	FALSE	TRUE	TRUE	intron (NR_029388, intron 1 of 12)	intron (NR_029388, intron 1 of 12)	9125	NR_029388	728407	Hs.499594	NR_029388		PARGP1	-	poly(ADP-ribose) glycohydrolase pseudogene 1	pseudo	1.025	20.4733	11.035	0.686667	0.585	3.51
Merged-chr10-52021053-3	chr10	52020853	52021326	FALSE	TRUE	FALSE	Intergenic	Intergenic	-12719	NM_001143974	56624	Hs.512645	NM_019893	ENSG00000188611	ASAH2	BCDase|HNAC1|LCDase|N-CDase|NCDase	N-acylsphingosine amidohydrolase 2	protein-coding	3.37	15.9133	5.37	3.16333	3.49	2.51
Merged-chr10-52153653-5	chr10	52153428	52153913	FALSE	TRUE	TRUE	intron (NM_147156, intron 6 of 10)	intron (NM_147156, intron 6 of 10)	-145300	NM_001143974	56624	Hs.512645	NM_019893	ENSG00000188611	ASAH2	BCDase|HNAC1|LCDase|N-CDase|NCDase	N-acylsphingosine amidohydrolase 2	protein-coding	4.76	23.3267	12.65	4.92333	4.65	4.01
Merged-chr10-52155269-3	chr10	52155081	52155457	FALSE	TRUE	FALSE	intron (NM_147156, intron 6 of 10)	Tigger13a|DNA|TcMar-Tigger	-146899	NM_001143974	56624	Hs.512645	NM_019893	ENSG00000188611	ASAH2	BCDase|HNAC1|LCDase|N-CDase|NCDase	N-acylsphingosine amidohydrolase 2	protein-coding	3.185	27.3333	7.325	2.18	1.94	2.51
Merged-chr10-52294709-3	chr10	52294517	52294956	FALSE	TRUE	FALSE	intron (NM_147156, intron 2 of 10)	AluSx1|SINE|Alu	89001	NM_147156	259230	Hs.654698	NM_147156	ENSG00000198964	SGMS1	MOB|MOB1|SMS1|TMEM23|hmob33	sphingomyelin synthase 1	protein-coding	1.095	15.46	6.87	2.05333	0.97	3.01
Merged-chr10-52331851-6	chr10	52331493	52332218	TRUE	TRUE	TRUE	intron (NM_147156, intron 2 of 10)	intron (NM_147156, intron 2 of 10)	51882	NM_147156	259230	Hs.654698	NM_147156	ENSG00000198964	SGMS1	MOB|MOB1|SMS1|TMEM23|hmob33	sphingomyelin synthase 1	protein-coding	19.585	99.2333	56.35	6.59	6.395	3.51
Merged-chr10-52354010-4	chr10	52353762	52354181	FALSE	TRUE	FALSE	intron (NM_147156, intron 1 of 10)	intron (NM_147156, intron 1 of 10)	29766	NM_147156	259230	Hs.654698	NM_147156	ENSG00000198964	SGMS1	MOB|MOB1|SMS1|TMEM23|hmob33	sphingomyelin synthase 1	protein-coding	1.615	17.2967	10.995	2.74667	1.745	2
Merged-chr10-52366504-5	chr10	52366236	52366702	FALSE	TRUE	TRUE	intron (NM_147156, intron 1 of 10)	intron (NM_147156, intron 1 of 10)	17268	NM_147156	259230	Hs.654698	NM_147156	ENSG00000198964	SGMS1	MOB|MOB1|SMS1|TMEM23|hmob33	sphingomyelin synthase 1	protein-coding	3.01	25.3133	17	3.43333	4.07	6.52
Merged-chr10-52642645-5	chr10	52642107	52643079	FALSE	TRUE	TRUE	intron (NM_001198819, intron 1 of 14)	intron (NM_001198819, intron 1 of 14)	2842	NM_138932	29974	Hs.282795	NM_014576	ENSG00000148584	A1CF	ACF|ACF64|ACF65|APOBEC1CF|ASP	APOBEC1 complementation factor	protein-coding	11.25	101.353	55.125	7.25333	8.53	8.02
Merged-chr10-54113820-5	chr10	54113628	54114038	FALSE	TRUE	TRUE	Intergenic	Intergenic	39890	NM_012242	22943	Hs.40499	NM_012242	ENSG00000107984	DKK1	DKK-1|SK	dickkopf WNT signaling pathway inhibitor 1	protein-coding	4.66	43.7933	17.565	4.67333	3.685	3.51
Merged-chr10-54143005-3	chr10	54142863	54143130	FALSE	FALSE	TRUE	Intergenic	Intergenic	69053	NM_012242	22943	Hs.40499	NM_012242	ENSG00000107984	DKK1	DKK-1|SK	dickkopf WNT signaling pathway inhibitor 1	protein-coding	1.21	8.44667	7.75	1.78667	2.52	2.51
Merged-chr10-55717440-5	chr10	55717129	55717844	FALSE	TRUE	TRUE	intron (NM_001354404, intron 25 of 34)	MER44B|DNA|TcMar-Tigger	-528504	NR_134503	105378311	Hs.623892	NR_134503	ENSG00000234173	LOC105378311	-	uncharacterized LOC105378311	ncRNA	9.37	56.9067	35.11	7.95333	7.755	4.01
Merged-chr10-56080621-2	chr10	56080458	56080834	FALSE	FALSE	TRUE	intron (NM_001142767, intron 6 of 30)	intron (NM_001142767, intron 6 of 30)	-165344	NR_134503	105378311	Hs.623892	NR_134503	ENSG00000234173	LOC105378311	-	uncharacterized LOC105378311	ncRNA	1.43	2.88	9.745	1.22	1.55	3.01
Merged-chr10-60038263-5	chr10	60038105	60038407	FALSE	TRUE	TRUE	intron (NM_018464, intron 2 of 2)	AluJb|SINE|Alu	9394	NM_018464	55847	Hs.370102	NM_018464	ENSG00000122873	CISD1	C10orf70|MDS029|ZCD1|mitoNEET	CDGSH iron sulfur domain 1	protein-coding	2.455	11.4233	12.17	1.09333	0.585	4.51
Merged-chr10-60228545-4	chr10	60228210	60228797	FALSE	TRUE	FALSE	Intergenic	Intergenic	-44401	NM_001080512	80114	Hs.100261	NM_001080512	ENSG00000122870	BICC1	BICC|CYSRD	BicC family RNA binding protein 1	protein-coding	5.79	27.5233	12.445	5.87667	4.85	5.51
Merged-chr10-60413110-3	chr10	60412946	60413282	FALSE	FALSE	TRUE	intron (NM_001080512, intron 2 of 20)	Charlie13a|DNA|hAT-Charlie	-61661	NR_027508	728640	Hs.729209	NR_027508		FAM133CP	-	family with sequence similarity 133, member A pseudogene	pseudo	2.34	5.87	12.58	1.1	0.97	0.5
Merged-chr10-60422367-3	chr10	60422173	60422657	FALSE	TRUE	FALSE	intron (NM_001080512, intron 2 of 20)	intron (NM_001080512, intron 2 of 20)	-52360	NR_027508	728640	Hs.729209	NR_027508		FAM133CP	-	family with sequence similarity 133, member A pseudogene	pseudo	3.515	20.17	8.655	3.96667	1.745	1.5
Merged-chr10-60656338-4	chr10	60656122	60656549	FALSE	TRUE	FALSE	Intergenic	Intergenic	-102943	NR_108046	100507008	Hs.170953	NR_108046		LINC00844	-	long intergenic non-protein coding RNA 844	ncRNA	0.875	25.2267	7.665	3.40667	1.555	2.51
Merged-chr10-60736185-4	chr10	60735946	60736374	FALSE	TRUE	FALSE	Intergenic	AluJb|SINE|Alu	-23118	NR_108046	100507008	Hs.170953	NR_108046		LINC00844	-	long intergenic non-protein coding RNA 844	ncRNA	0.84	15.9667	8.43	1.64333	1.36	2.51
Merged-chr10-60754352-5	chr10	60754022	60754663	FALSE	TRUE	TRUE	Intergenic	Intergenic	-4936	NR_108046	100507008	Hs.170953	NR_108046		LINC00844	-	long intergenic non-protein coding RNA 844	ncRNA	9.565	46.2633	26.95	7.55	6.2	8.02
Merged-chr10-60833461-5	chr10	60833187	60833796	FALSE	TRUE	TRUE	Intergenic	LTR40b|LTR|ERVL	74213	NR_108046	100507008	Hs.170953	NR_108046		LINC00844	-	long intergenic non-protein coding RNA 844	ncRNA	8.67	46.2467	20.215	6.82667	8.145	6.52
Merged-chr10-62186390-5	chr10	62186116	62186883	FALSE	TRUE	TRUE	intron (NM_001204403, intron 2 of 43)	intron (NM_001204403, intron 2 of 43)	-36757	NM_001320874	288	Hs.499725	NM_001149	ENSG00000151150	ANK3	ANKYRIN-G|MRT37	ankyrin 3	protein-coding	2.79	34.1933	17.29	3.44	2.525	4.01
Merged-chr10-62712689-5	chr10	62712286	62712946	FALSE	TRUE	FALSE	intron (NM_001350907, intron 2 of 12)	intron (NM_001350907, intron 2 of 12)	-8096	NM_001350911	9886	Hs.737374	NM_014836	ENSG00000072422	RHOBTB1	-	Rho related BTB domain containing 1	protein-coding	2.79	21.5433	11.675	3.15333	3.1	6.01
Merged-chr10-62803416-4	chr10	62803010	62803754	FALSE	TRUE	FALSE	Intergenic	Intergenic	27349	NR_108052	100507058	Hs.145227	NR_108052	ENSG00000227244	LINC00845	-	long intergenic non-protein coding RNA 845	ncRNA	6.74	33.9433	15.415	4.65333	6.98	2.51
Merged-chr10-63169080-4	chr10	63168946	63169321	FALSE	TRUE	FALSE	3' UTR (NM_178505, exon 6 of 6)	3' UTR (NM_178505, exon 6 of 6)	-43264	NR_120643	101928781	Hs.568856	NR_120643		TMEM26-AS1	-	TMEM26 antisense RNA 1	ncRNA	2.235	10.3833	8.545	1.66667	1.36	0.5
Merged-chr10-63592877-5	chr10	63592648	63593053	FALSE	TRUE	TRUE	Intergenic	L1MB5|LINE|L1	-68163	NM_032199	84159	Hs.535297	NM_032199	ENSG00000150347	ARID5B	DESRT|MRF-2|MRF2	AT-rich interaction domain 5B	protein-coding	4.355	16.3967	10.675	0.55	0.97	0.5
Merged-chr10-63661231-4	chr10	63660973	63661499	FALSE	FALSE	TRUE	5' UTR (NM_032199, exon 1 of 10)	5' UTR (NM_032199, exon 1 of 10)	223	NM_032199	84159	Hs.535297	NM_032199	ENSG00000150347	ARID5B	DESRT|MRF-2|MRF2	AT-rich interaction domain 5B	protein-coding	4.39	25.86	34.52	4.78667	3.295	3.51
Merged-chr10-63678942-3	chr10	63678837	63679081	FALSE	TRUE	FALSE	intron (NM_032199, intron 2 of 9)	intron (NM_032199, intron 2 of 9)	17946	NM_032199	84159	Hs.535297	NM_032199	ENSG00000150347	ARID5B	DESRT|MRF-2|MRF2	AT-rich interaction domain 5B	protein-coding	0.625	7.02	4.945	0.56	0.97	1
Merged-chr10-63747791-3	chr10	63747613	63747945	FALSE	TRUE	FALSE	intron (NM_032199, intron 3 of 9)	intron (NM_032199, intron 3 of 9)	-61191	NM_001244638	84159	Hs.535297	NM_032199	ENSG00000150347	ARID5B	DESRT|MRF-2|MRF2	AT-rich interaction domain 5B	protein-coding	0.875	17.6067	7.14	1.50333	1.36	0
Merged-chr10-63855337-5	chr10	63854842	63855716	FALSE	TRUE	TRUE	3' UTR (NM_001244638, exon 7 of 7)	3' UTR (NM_001244638, exon 7 of 7)	46309	NM_001244638	84159	Hs.535297	NM_032199	ENSG00000150347	ARID5B	DESRT|MRF-2|MRF2	AT-rich interaction domain 5B	protein-coding	5.68	81.17	46.78	8.91333	6.59	6.01
Merged-chr10-64024742-5	chr10	64024532	64024908	FALSE	TRUE	TRUE	intron (NM_145307, intron 1 of 11)	intron (NM_145307, intron 1 of 11)	3902	NM_145307	219790	Hs.58559	NM_145307	ENSG00000182010	RTKN2	PLEKHK1|bA531F24.1	rhotekin 2	protein-coding	2.79	17.2967	12.625	2.61333	3.485	2
Merged-chr10-64256840-3	chr10	64256639	64256990	FALSE	FALSE	TRUE	intron (NM_199451, intron 4 of 7)	intron (NM_199451, intron 4 of 7)	-23393	NM_199452	22891	Hs.22653	NM_014951	ENSG00000138311	ZNF365	Su48|UAN|ZNF365D	zinc finger protein 365	protein-coding	1.025	4.03667	7.095	0.403333	0.775	0.5
Merged-chr10-64320221-5	chr10	64319995	64320532	FALSE	TRUE	TRUE	intron (NM_199452, intron 1 of 6)	intron (NM_199452, intron 1 of 6)	40056	NM_199452	22891	Hs.22653	NM_014951	ENSG00000138311	ZNF365	Su48|UAN|ZNF365D	zinc finger protein 365	protein-coding	2.165	20.1233	11.375	1.92333	1.555	2
Merged-chr10-64397580-3	chr10	64397436	64397777	FALSE	TRUE	FALSE	intron (NM_199451, intron 5 of 7)	intron (NM_199451, intron 5 of 7)	117399	NM_199452	22891	Hs.22653	NM_014951	ENSG00000138311	ZNF365	Su48|UAN|ZNF365D	zinc finger protein 365	protein-coding	0.81	11.85	3.925	0.97	1.165	3.51
Merged-chr10-64874051-5	chr10	64873669	64874472	FALSE	TRUE	TRUE	Intergenic	Intergenic	-18937	NM_001282405	29982	Hs.449628	NM_030759	ENSG00000148572	NRBF2	COPR|COPR1|COPR2|NRBF-2	nuclear receptor binding factor 2	protein-coding	7.215	97.99	60.47	5.32	4.65	5.01
Merged-chr10-65027224-4	chr10	65026863	65027545	FALSE	FALSE	TRUE	intron (NM_001322258, intron 2 of 24)	intron (NM_001322258, intron 2 of 24)	1779	NM_001318153	221037	Hs.413416	NM_004241	ENSG00000171988	JMJD1C	KDM3C|TRIP-8|TRIP8	jumonji domain containing 1C	protein-coding	5.43	27.44	21.555	5.75667	3.1	6.01
Merged-chr10-65227553-5	chr10	65227254	65227766	FALSE	FALSE	TRUE	intron (NM_001322258, intron 1 of 24)	intron (NM_001322258, intron 1 of 24)	-1749	NM_032776	221037	Hs.413416	NM_004241	ENSG00000171988	JMJD1C	KDM3C|TRIP-8|TRIP8	jumonji domain containing 1C	protein-coding	3.515	13.2	14.62	3.42	5.425	3.01
Merged-chr10-65463071-5	chr10	65462820	65463373	FALSE	TRUE	TRUE	Intergenic	Intergenic	-181261	NM_001322258	221037	Hs.413416	NM_004241	ENSG00000171988	JMJD1C	KDM3C|TRIP-8|TRIP8	jumonji domain containing 1C	protein-coding	6.545	28.4767	24.09	3.55	3.49	3.01
Merged-chr10-65467240-3	chr10	65467032	65467451	FALSE	TRUE	FALSE	Intergenic	Intergenic	-185406	NM_001322258	221037	Hs.413416	NM_004241	ENSG00000171988	JMJD1C	KDM3C|TRIP-8|TRIP8	jumonji domain containing 1C	protein-coding	1.545	23.5333	6.665	3.84	1.36	4.51
Merged-chr10-65579765-4	chr10	65579604	65580021	FALSE	TRUE	FALSE	Intergenic	Intergenic	-297977	NM_001322258	221037	Hs.413416	NM_004241	ENSG00000171988	JMJD1C	KDM3C|TRIP-8|TRIP8	jumonji domain containing 1C	protein-coding	3.01	12.6233	9.88	1.93667	3.1	1.5
Merged-chr10-65682301-5	chr10	65682105	65682521	FALSE	TRUE	TRUE	Intergenic	Intergenic	-400478	NM_001322258	221037	Hs.413416	NM_004241	ENSG00000171988	JMJD1C	KDM3C|TRIP-8|TRIP8	jumonji domain containing 1C	protein-coding	1.395	24.6233	9.93	1.63	2.135	0
Merged-chr10-69550942-5	chr10	69550608	69551215	FALSE	TRUE	TRUE	Intergenic	Intergenic	47026	NM_201262	56521	Hs.260720	NM_021800	ENSG00000108176	DNAJC12	HPANBH4|JDP1	DnaJ heat shock protein family (Hsp40) member C12	protein-coding	3.37	28.72	19.99	3.54667	3.49	3.51
Merged-chr10-69563462-7	chr10	69562631	69564012	TRUE	TRUE	TRUE	intron (NM_021800, intron 4 of 4)	intron (NM_021800, intron 4 of 4)	34616	NM_201262	56521	Hs.260720	NM_021800	ENSG00000108176	DNAJC12	HPANBH4|JDP1	DnaJ heat shock protein family (Hsp40) member C12	protein-coding	14.815	79.8333	51.315	12.6133	10.47	13.53
Merged-chr10-69579732-5	chr10	69579566	69579889	FALSE	TRUE	TRUE	intron (NM_201262, intron 2 of 2)	L2b|LINE|L2	18210	NM_201262	56521	Hs.260720	NM_021800	ENSG00000108176	DNAJC12	HPANBH4|JDP1	DnaJ heat shock protein family (Hsp40) member C12	protein-coding	1.685	28.0833	13.035	2.46	1.355	2
Merged-chr10-69609879-5	chr10	69609334	69610217	FALSE	TRUE	TRUE	Intergenic	Intergenic	-11838	NM_021800	56521	Hs.260720	NM_021800	ENSG00000108176	DNAJC12	HPANBH4|JDP1	DnaJ heat shock protein family (Hsp40) member C12	protein-coding	8.09	41.2567	22.895	7.27667	7.755	8.02
Merged-chr10-69649659-5	chr10	69649345	69650087	FALSE	TRUE	TRUE	intron (NM_012238, intron 3 of 8)	intron (NM_012238, intron 3 of 8)	-1444	NM_001314049	23411	Hs.369779	NM_012238	ENSG00000096717	SIRT1	SIR2|SIR2L1|SIR2alpha	sirtuin 1	protein-coding	6.95	46.96	21.35	5.06	3.49	4.01
Merged-chr10-70358895-5	chr10	70358695	70359073	FALSE	TRUE	TRUE	intron (NM_030625, intron 2 of 11)	intron (NM_030625, intron 2 of 11)	38767	NM_030625	80312	Hs.258855	NM_030625	ENSG00000138336	TET1	CXXC6|LCX|bA119F7.1	tet methylcytosine dioxygenase 1	protein-coding	3.955	17.54	12.355	3.27667	3.1	6.01
Merged-chr10-70369930-5	chr10	70369620	70370211	FALSE	TRUE	TRUE	intron (NM_030625, intron 3 of 11)	AluY|SINE|Alu	49798	NM_030625	80312	Hs.258855	NM_030625	ENSG00000138336	TET1	CXXC6|LCX|bA119F7.1	tet methylcytosine dioxygenase 1	protein-coding	4.3	21.94	17.205	3.00333	1.555	2.51
Merged-chr10-70565362-3	chr10	70565218	70565542	FALSE	TRUE	FALSE	Intergenic	FRAM|SINE|Alu	-21914	NM_001130159	219736	Hs.37636	NM_152709	ENSG00000165730	STOX1	C10orf24	storkhead box 1	protein-coding	2.965	15.0133	6.55	1.91	2.325	1.5
Merged-chr10-70717204-4	chr10	70716783	70717537	FALSE	FALSE	TRUE	intron (NM_001256910, intron 1 of 14)	intron (NM_001256910, intron 1 of 14)	964	NM_001256910	9188	Hs.223141	NM_004728	ENSG00000165732	DDX21	GUA|GURDB|RH-II/GU|RH-II/GuA	DExD-box helicase 21	protein-coding	6.025	34.3633	40.37	8.16333	5.815	6.52
Merged-chr10-70821337-5	chr10	70821086	70821552	FALSE	TRUE	TRUE	Intergenic	Intergenic	-25883	NM_001321053	5552	Hs.1908	NM_002727	ENSG00000122862	SRGN	PPG|PRG|PRG1	serglycin	protein-coding	4.22	48.0567	20.355	4.78667	4.655	4.51
Merged-chr10-70974667-4	chr10	70974205	70975006	FALSE	TRUE	FALSE	TTS (NR_120648)	TTS (NR_120648)	-5454	NM_025130	80201	Hs.522988	NM_025130	ENSG00000156510	HKDC1	-	hexokinase domain containing 1	protein-coding	5.325	22.74	12.285	2.61667	3.295	3.51
Merged-chr10-70977227-5	chr10	70976907	70977670	FALSE	TRUE	TRUE	intron (NR_120648, intron 4 of 4)	intron (NR_120648, intron 4 of 4)	-2771	NM_025130	80201	Hs.522988	NM_025130	ENSG00000156510	HKDC1	-	hexokinase domain containing 1	protein-coding	4.795	64.1167	44.49	6.88667	3.49	5.51
Merged-chr10-71029739-5	chr10	71029522	71030049	FALSE	TRUE	TRUE	promoter-TSS (NM_001322365)	promoter-TSS (NM_001322365)	29	NM_001322364	3098	Hs.370365	NM_000188	ENSG00000156515	HK1	HK|HK1-ta|HK1-tb|HK1-tc|HKD|HKI|HMSNR|HXK1|RP79|hexokinase	hexokinase 1	protein-coding	2.755	15.9533	11.175	2.04667	2.52	3.01
Merged-chr10-71074936-3	chr10	71074773	71075083	FALSE	TRUE	FALSE	promoter-TSS (NM_033496)	promoter-TSS (NM_033496)	-682	NM_033496	3098	Hs.370365	NM_000188	ENSG00000156515	HK1	HK|HK1-ta|HK1-tb|HK1-tc|HKD|HKI|HMSNR|HXK1|RP79|hexokinase	hexokinase 1	protein-coding	0.995	17.2433	4.465	0.693333	1.355	0
Merged-chr10-71850777-3	chr10	71850603	71850936	FALSE	TRUE	FALSE	intron (NM_018649, intron 3 of 8)	Charlie7a|DNA|hAT-Charlie	38412	NM_018649	55506	Hs.499953	NM_018649	ENSG00000099284	H2AFY2	macroH2A2	H2A histone family member Y2	protein-coding	3.48	17.6867	9.745	4.13333	4.65	4.51
Merged-chr10-71890942-4	chr10	71890765	71891108	FALSE	TRUE	FALSE	intron (NM_001198696, intron 1 of 8)	intron (NM_001198696, intron 1 of 8)	1754	NM_001198696	84883	Hs.650680	NM_032797	ENSG00000042286	AIFM2	AMID|PRG3	apoptosis inducing factor, mitochondria associated 2	protein-coding	4.725	24.72	10.13	3.7	3.49	2
Merged-chr10-72482825-4	chr10	72482648	72483102	FALSE	TRUE	FALSE	intron (NM_080722, intron 4 of 21)	L1MC3|LINE|L1	50613	NM_080722	140766	Hs.352156	NM_080722	ENSG00000138316	ADAMTS14	-	ADAM metallopeptidase with thrombospondin type 1 motif 14	protein-coding	1.43	24.34	8.385	2.61	1.94	1
Merged-chr10-72576340-4	chr10	72576189	72576516	FALSE	TRUE	FALSE	intron (NM_003901, intron 1 of 14)	intron (NM_003901, intron 1 of 14)	648	NM_003901	8879	Hs.499984	NM_003901	ENSG00000166224	SGPL1	NPHS14|S1PL|SPL	sphingosine-1-phosphate lyase 1	protein-coding	3.665	12.7567	8.59	3.29333	2.715	1.5
Merged-chr10-73026280-5	chr10	73025821	73026753	FALSE	TRUE	TRUE	intron (NM_170744, intron 1 of 16)	intron (NM_170744, intron 1 of 16)	-48302	NR_038453	728978	Hs.646725	NR_038453	ENSG00000237512	UNC5B-AS1	-	UNC5B antisense RNA 1	ncRNA	5.755	125.467	64.035	8.48667	1.935	6.01
Merged-chr10-73090925-4	chr10	73090604	73091157	FALSE	FALSE	TRUE	intron (NR_033414, intron 2 of 3)	intron (NR_033414, intron 2 of 3)	11870	NM_018344	55315	Hs.438419	NM_018344	ENSG00000198246	SLC29A3	ENT3|HCLAP|HJCD|PHID	solute carrier family 29 member 3	protein-coding	3.63	23.12	23.525	3.00667	3.1	3.01
Merged-chr10-73398013-4	chr10	73397703	73398204	FALSE	TRUE	FALSE	intron (NM_052836, intron 11 of 12)	MIRb|SINE|MIR	81625	NM_001164375	414152	Hs.568788	NM_001164375	ENSG00000214688	C10orf105	-	chromosome 10 open reading frame 105	protein-coding	6.26	24.4633	10.495	4.78667	4.265	2
Merged-chr10-73620463-4	chr10	73620156	73620777	FALSE	FALSE	TRUE	Intergenic	Charlie4z|DNA|hAT-Charlie	-9334	NM_001042466	5660	Hs.523004	NM_002778	ENSG00000197746	PSAP	GLBA|SAP1	prosaposin	protein-coding	7.135	48.54	26.27	8.17333	5.62	7.02
Merged-chr10-73622474-5	chr10	73622176	73622816	FALSE	TRUE	TRUE	Intergenic	Intergenic	-11364	NM_001042466	5660	Hs.523004	NM_002778	ENSG00000197746	PSAP	GLBA|SAP1	prosaposin	protein-coding	1.76	34.72	18.68	5.18333	2.325	6.52
Merged-chr10-73790118-5	chr10	73789869	73790369	FALSE	TRUE	TRUE	Intergenic	AluSx|SINE|Alu	58412	NM_001244950	9806	Hs.523009	NM_014767	ENSG00000107742	SPOCK2	testican-2	SPARC (osteonectin), cwcv and kazal like domains proteoglycan 2	protein-coding	4.51	22.1633	17	4.01333	2.715	4.51
Merged-chr10-73808435-5	chr10	73808291	73808595	FALSE	TRUE	TRUE	Intergenic	Intergenic	40088	NM_001244950	9806	Hs.523009	NM_014767	ENSG00000107742	SPOCK2	testican-2	SPARC (osteonectin), cwcv and kazal like domains proteoglycan 2	protein-coding	3.62	30.7567	23.82	3.44333	2.905	5.01
Merged-chr10-73857649-4	chr10	73857502	73857791	FALSE	TRUE	FALSE	intron (NM_001198798, intron 9 of 9)	intron (NM_001198798, intron 9 of 9)	-8856	NM_001134434	9806	Hs.523009	NM_014767	ENSG00000107742	SPOCK2	testican-2	SPARC (osteonectin), cwcv and kazal like domains proteoglycan 2	protein-coding	3.445	16.8333	8.14	3.31333	1.55	1
Merged-chr10-73995561-3	chr10	73995341	73995857	FALSE	FALSE	TRUE	TTS (NM_001242546)	TTS (NM_001242546)	-18707	NR_045564	51008	Hs.500007	NM_015947	ENSG00000138303	ASCC1	ASC1p50|CGI-18|SMABF2|p50	activating signal cointegrator 1 complex subunit 1	protein-coding	2.235	7.05	13.665	2.32667	3.105	3.01
Merged-chr10-74032657-7	chr10	74032055	74033465	TRUE	TRUE	TRUE	promoter-TSS (NM_019058)	promoter-TSS (NM_019058)	-917	NM_019058	54541	Hs.744875	NM_019058	ENSG00000168209	DDIT4	Dig2|REDD-1|REDD1	DNA damage inducible transcript 4	protein-coding	62.485	439.883	209.8	15.61	10.08	17.54
Merged-chr10-74067270-5	chr10	74066990	74067551	FALSE	TRUE	TRUE	Intergenic	AluSq2|SINE|Alu	33593	NM_019058	54541	Hs.744875	NM_019058	ENSG00000168209	DDIT4	Dig2|REDD-1|REDD1	DNA damage inducible transcript 4	protein-coding	3.885	17.1067	12.9	3.29	2.71	4.51
Merged-chr10-74079531-6	chr10	74078868	74080069	FALSE	TRUE	TRUE	Intergenic	CpG	35439	NM_001002762	54788	Hs.500013	NM_017626	ENSG00000148719	DNAJB12	DJ10	DnaJ heat shock protein family (Hsp40) member B12	protein-coding	10.385	60.21	26.95	8.46333	10.665	10.02
Merged-chr10-74080773-6	chr10	74080519	74081229	TRUE	TRUE	TRUE	Intergenic	Intergenic	34033	NM_001002762	54788	Hs.500013	NM_017626	ENSG00000148719	DNAJB12	DJ10	DnaJ heat shock protein family (Hsp40) member B12	protein-coding	15.435	64.5767	39.96	6.53667	7.365	6.52
Merged-chr10-74168263-5	chr10	74168030	74168440	FALSE	TRUE	TRUE	intron (NM_001195519, intron 4 of 6)	AluSz|SINE|Alu	-53328	NM_017626	54788	Hs.500013	NM_017626	ENSG00000148719	DNAJB12	DJ10	DnaJ heat shock protein family (Hsp40) member B12	protein-coding	2.2	14.1633	8.975	2.59333	2.135	2
Merged-chr10-75022005-5	chr10	75021833	75022200	FALSE	TRUE	TRUE	intron (NM_001350933, intron 25 of 26)	MER44C|DNA|TcMar-Tigger	9517	NR_134460	414245	Hs.568860	NR_038373	ENSG00000227540	DNAJC9-AS1	C10orf103|bA537A6.3	DNAJC9 antisense RNA 1	ncRNA	2.235	43.9633	16.795	3.17333	1.555	1.5
Merged-chr10-75346684-5	chr10	75346491	75347002	FALSE	TRUE	TRUE	intron (NM_001350995, intron 1 of 21)	intron (NM_001350995, intron 1 of 21)	4362	NR_135249	159195	Hs.657355	NM_152586	ENSG00000166348	USP54	C10orf29|bA137L10.3|bA137L10.4	ubiquitin specific peptidase 54	protein-coding	7.285	34.96	24.09	6.45667	6.205	5.01
Merged-chr10-75973390-5	chr10	75973139	75973617	FALSE	TRUE	TRUE	intron (NM_001202449, intron 2 of 9)	intron (NM_001202449, intron 2 of 9)	37131	NM_001202449	132	Hs.656586	NM_001123	ENSG00000156110	ADK	AK	adenosine kinase	protein-coding	2.2	20.5133	15.14	2.46	2.33	4.51
Merged-chr10-75983975-4	chr10	75983708	75984227	FALSE	FALSE	TRUE	intron (NM_001202449, intron 2 of 9)	intron (NM_001202449, intron 2 of 9)	47720	NM_001202449	132	Hs.656586	NM_001123	ENSG00000156110	ADK	AK	adenosine kinase	protein-coding	1.14	24.1933	20.72	4.5	1.36	3.01
Merged-chr10-76308604-3	chr10	76308484	76308716	FALSE	TRUE	FALSE	intron (NM_001123, intron 7 of 10)	intron (NM_001123, intron 7 of 10)	-19518	NR_120673	102723439		NR_120673		LOC102723439	-	uncharacterized LOC102723439	ncRNA	1.615	10.6333	3.67	1.38333	0.97	1
Merged-chr10-76635894-5	chr10	76635675	76636074	FALSE	TRUE	TRUE	intron (NM_012330, intron 3 of 17)	intron (NM_012330, intron 3 of 17)	-36670	NR_134476	101929165	Hs.670533	NR_134476		LOC101929165	-	uncharacterized LOC101929165	ncRNA	1.575	21.0667	9.25	1.92667	2.52	2.51
Merged-chr10-76808763-4	chr10	76808568	76808969	FALSE	FALSE	TRUE	intron (NM_001003892, intron 1 of 2)	intron (NM_001003892, intron 1 of 2)	9573	NM_001003892	338599	Hs.535090	NM_001003892	ENSG00000188716	DUPD1	DUSP27|FMDSP	dual specificity phosphatase and pro isomerase domain containing 1	protein-coding	2.275	12.6867	15.775	2.32	1.94	1.5
Merged-chr10-76922083-3	chr10	76921911	76922226	FALSE	FALSE	TRUE	intron (NM_001174156, intron 2 of 5)	AluSx1|SINE|Alu	-47844	NM_001184783	7417	Hs.355927	NM_003375	ENSG00000165637	VDAC2	POR	voltage dependent anion channel 2	protein-coding	1.545	7.23667	8.75	1.08	2.905	2
Merged-chr10-76949746-5	chr10	76949568	76949917	FALSE	TRUE	TRUE	Intergenic	MIRc|SINE|MIR	-20170	NM_001184783	7417	Hs.355927	NM_003375	ENSG00000165637	VDAC2	POR	voltage dependent anion channel 2	protein-coding	2.235	13.2967	11.65	1.51	2.13	2.51
Merged-chr10-77118935-5	chr10	77118712	77119245	FALSE	TRUE	TRUE	intron (NR_038223, intron 2 of 2)	intron (NR_038223, intron 2 of 2)	-42308	NR_024421	100131213	Hs.534598	NR_024421	ENSG00000237149	ZNF503-AS2	C10orf41|NCRNA00245	ZNF503 antisense RNA 2	ncRNA	2.015	27.7133	14.03	1.9	1.745	3.01
Merged-chr10-77140633-4	chr10	77140274	77140910	FALSE	FALSE	TRUE	intron (NR_120651, intron 1 of 3)	intron (NR_120651, intron 1 of 3)	-20694	NR_024421	100131213	Hs.534598	NR_024421	ENSG00000237149	ZNF503-AS2	C10orf41|NCRNA00245	ZNF503 antisense RNA 2	ncRNA	2.825	17	13.85	3.55667	3.1	2
Merged-chr10-77490910-3	chr10	77490707	77491158	FALSE	TRUE	FALSE	intron (NR_132791, intron 1 of 2)	intron (NR_132791, intron 1 of 2)	18719	NR_132791	105378367	Hs.464836	NR_132791		LOC105378367	-	uncharacterized LOC105378367	ncRNA	3.345	14.4333	8.385	2.06667	3.68	4.01
Merged-chr10-77504273-5	chr10	77504070	77504543	FALSE	TRUE	TRUE	TTS (NR_132791)	TTS (NR_132791)	32093	NR_132791	105378367	Hs.464836	NR_132791		LOC105378367	-	uncharacterized LOC105378367	ncRNA	3.33	14.5533	12.99	2.07667	2.905	2
Merged-chr10-77515392-5	chr10	77514889	77515824	FALSE	TRUE	TRUE	intron (NR_131178, intron 1 of 7)	L2a|LINE|L2	-27163	NM_032024	83938	Hs.118161	NM_032024	ENSG00000148655	LRMDA	C10orf11|CDA017	leucine rich melanocyte differentiation associated	protein-coding	15.055	80.7333	56.505	7.78333	9.5	10.02
Merged-chr10-77548405-3	chr10	77548203	77548821	FALSE	TRUE	FALSE	intron (NM_032024, intron 1 of 5)	MLT1J|LTR|ERVL-MaLR	5993	NM_032024	83938	Hs.118161	NM_032024	ENSG00000148655	LRMDA	C10orf11|CDA017	leucine rich melanocyte differentiation associated	protein-coding	6.05	24.2067	11.29	6.18333	4.265	6.01
Merged-chr10-78933680-2	chr10	78933568	78933821	FALSE	FALSE	TRUE	intron (NM_001014797, intron 5 of 28)	intron (NM_001014797, intron 5 of 28)	33105	NR_120654	101929310	Hs.666457	NR_120654	ENSG00000225497	KCNMA1-AS2	-	KCNMA1 antisense RNA 2	ncRNA	1.945	7.66333	7.975	2.05333	1.355	1.5
Merged-chr10-79304605-3	chr10	79304471	79304731	FALSE	FALSE	TRUE	intron (NM_001014797, intron 1 of 28)	L3|LINE|CR1	92976	NM_001322837	3778	Hs.144795	NM_002247	ENSG00000156113	KCNMA1	BKTM|CADEDS|KCa1.1|MaxiK|PNKD3|SAKCA|SLO|SLO-ALPHA|SLO1|bA205K10.1|hSlo|mSLO1	potassium calcium-activated channel subfamily M alpha 1	protein-coding	0.84	3.78333	7.955	0.95	0.39	0
Merged-chr10-79725322-5	chr10	79725106	79725549	FALSE	TRUE	TRUE	Intergenic	AluSq2|SINE|Alu	38757	NR_024585	100128292	Hs.547908	NR_024585		DLG5-AS1	-	DLG5 antisense RNA 1	ncRNA	2.89	13.7267	12.92	2.46	1.94	2.51
Merged-chr10-80015997-5	chr10	80015678	80016309	FALSE	TRUE	TRUE	Intergenic	Intergenic	7611	NR_038985	100132987	Hs.55047	NR_038985	ENSG00000230417	LINC00856	-	long intergenic non-protein coding RNA 856	ncRNA	2.2	33.6133	16.32	3.3	2.52	3.01
Merged-chr10-80201689-5	chr10	80201188	80202098	FALSE	TRUE	TRUE	Intergenic	Intergenic	174558	NR_073447	414243	Hs.55047	NR_073447	ENSG00000230417	LINC00595	C10orf101	long intergenic non-protein coding RNA 595	ncRNA	5.865	58.83	30.92	6.17333	4.655	8.02
Merged-chr10-80218807-5	chr10	80218442	80219086	FALSE	TRUE	TRUE	Intergenic	Intergenic	191679	NR_073447	414243	Hs.55047	NR_073447	ENSG00000230417	LINC00595	C10orf101	long intergenic non-protein coding RNA 595	ncRNA	4.845	54.0567	19.31	8.91	7.175	7.02
Merged-chr10-80758241-5	chr10	80758034	80758488	FALSE	TRUE	TRUE	intron (NR_015429, intron 3 of 7)	intron (NR_015429, intron 3 of 7)	68944	NR_024429	283050	Hs.309176	NR_015429	ENSG00000224596	ZMIZ1-AS1	-	ZMIZ1 antisense RNA 1	ncRNA	3.11	22.78	13.19	1.78667	1.94	2
Merged-chr10-80915069-4	chr10	80914790	80915278	FALSE	FALSE	TRUE	intron (NM_020338, intron 3 of 24)	intron (NM_020338, intron 3 of 24)	86242	NM_020338	57178	Hs.193118	NM_020338	ENSG00000108175	ZMIZ1	MIZ|RAI17|TRAFIP10|ZIMP10	zinc finger MIZ-type containing 1	protein-coding	2.605	21.9567	14.075	3.56333	2.91	3.51
Merged-chr10-81105160-5	chr10	81104815	81105388	FALSE	TRUE	TRUE	Intergenic	Intergenic	-2119	NM_005729	10105	Hs.381072	NM_005729	ENSG00000108179	PPIF	CYP3|CyP-M|Cyp-D|CypD	peptidylprolyl isomerase F	protein-coding	3.295	23.3767	16.41	4.14	1.94	2.51
Merged-chr10-81905747-5	chr10	81905372	81905991	FALSE	TRUE	TRUE	TTS (NM_001331125)	TTS (NM_001331125)	13423	NM_001331125	219348	Hs.204947	NM_001012973	ENSG00000189129	PLAC9	-	placenta specific 9	protein-coding	2.235	25.7367	12.875	3.82	1.55	1.5
Merged-chr10-82019277-5	chr10	82018966	82019631	FALSE	TRUE	TRUE	Intergenic	AluSx|SINE|Alu	11784	NR_136612	100130698	Hs.447456	NR_136612		LOC100130698	-	uncharacterized LOC100130698	ncRNA	5.245	16.59	12.94	3.03667	3.875	3.51
Merged-chr10-82041783-6	chr10	82041509	82042084	TRUE	TRUE	TRUE	intron (NM_000429, intron 3 of 8)	intron (NM_000429, intron 3 of 8)	7638	NM_000429	4143	Hs.282670	NM_000429	ENSG00000151224	MAT1A	MAT|MATA1|SAMS|SAMS1	methionine adenosyltransferase 1A	protein-coding	11.24	57.54	31.21	4.79333	5.235	5.01
Merged-chr10-82156999-5	chr10	82156800	82157315	FALSE	TRUE	TRUE	Intergenic	Intergenic	-10528	NM_001243779	84293	Hs.500333	NM_032333	ENSG00000122378	FAM213A	Adrx|C10orf58|PAMM	family with sequence similarity 213 member A	protein-coding	1.73	14.9033	11.065	1.77333	2.325	1.5
Merged-chr10-82243788-5	chr10	82243509	82244092	FALSE	TRUE	TRUE	intron (NM_001351266, intron 2 of 9)	AluSz|SINE|Alu	15781	NM_001351271	81619	Hs.718943	NM_030927	ENSG00000108219	TSPAN14	DC-TM4F2|TM4SF14	tetraspanin 14	protein-coding	5.5	23.18	15.755	4.1	3.295	4.51
Merged-chr10-85767427-3	chr10	85767244	85767578	FALSE	FALSE	TRUE	Intergenic	Intergenic	-131774	NM_014394	27069	Hs.352656	NM_014394	ENSG00000165678	GHITM	DERP2|HSPC282|MICS1|My021|PTD010|TMBIM5	growth hormone inducible transmembrane protein	protein-coding	1.43	7.40333	8.5	0.54	0.78	0.5
Merged-chr10-85899657-9	chr10	85899047	85900356	FALSE	TRUE	TRUE	intron (NM_014394, intron 1 of 8)	intron (NM_014394, intron 1 of 8)	516	NM_014394	27069	Hs.352656	NM_014394	ENSG00000165678	GHITM	DERP2|HSPC282|MICS1|My021|PTD010|TMBIM5	growth hormone inducible transmembrane protein	protein-coding	13.035	74.0967	58.98	12.0833	10.47	11.53
Merged-chr10-86029780-5	chr10	86029600	86029973	FALSE	TRUE	TRUE	Intergenic	Intergenic	-9950	NR_038220	170425	Hs.434131	NR_038220	ENSG00000229404	LINC00858	-	long intergenic non-protein coding RNA 858	ncRNA	0.995	27.2	10.315	1.65	2.325	1
Merged-chr10-86086969-3	chr10	86086672	86087235	FALSE	TRUE	FALSE	Intergenic	AluSx3|SINE|Alu	-1392	NM_001284240	54462	Hs.461988	NM_018999	ENSG00000107771	CCSER2	FAM190B|Gcap14|KIAA1128|bA486O22.1	coiled-coil serine rich protein 2	protein-coding	3.805	23.06	10.61	5.08333	3.1	5.51
Merged-chr10-88354461-5	chr10	88354295	88354645	FALSE	TRUE	TRUE	Intergenic	L1MB4|LINE|L1	-59844	NM_001030015	94233	Hs.283922	NM_033282	ENSG00000122375	OPN4	MOP	opsin 4	protein-coding	0.59	21.2233	15.3	1.63667	0.585	3.51
Merged-chr10-88852913-6	chr10	88852327	88853488	FALSE	TRUE	TRUE	intron (NM_001318905, intron 1 of 15)	intron (NM_001318905, intron 1 of 15)	937	NM_001318902	2746	Hs.500409	NM_005271	ENSG00000148672	GLUD1	GDH|GDH1|GLUD	glutamate dehydrogenase 1	protein-coding	13.59	62.14	52.475	8.64	8.145	10.02
Merged-chr10-89260668-5	chr10	89260405	89261011	FALSE	TRUE	TRUE	Intergenic	Intergenic	-2930	NR_039825	100616296		NR_039825	ENSG00000283672	MIR4678	-	microRNA 4678	ncRNA	11.94	55.8867	40.325	6.47	7.365	5.01
Merged-chr10-89267861-4	chr10	89267587	89268136	FALSE	FALSE	TRUE	5' UTR (NM_001178118, exon 1 of 5)	5' UTR (NM_001178118, exon 1 of 5)	271	NM_001178118	9562	Hs.121260	NM_004897	ENSG00000107789	MINPP1	HIPER1|MINPP2|MIPP	multiple inositol-polyphosphate phosphatase 1	protein-coding	5.245	27.7933	25.955	3.29667	2.52	4.01
Merged-chr10-89351024-5	chr10	89350653	89351538	FALSE	TRUE	TRUE	Intergenic	Intergenic	-68381	NM_004670	9060	Hs.524491	NM_004670	ENSG00000198682	PAPSS2	ATPSK2|BCYM4|SK2	3'-phosphoadenosine 5'-phosphosulfate synthase 2	protein-coding	11.4	62.2067	22.53	8.76333	7.365	6.01
Merged-chr10-89624721-5	chr10	89624447	89625078	FALSE	TRUE	TRUE	intron (NM_000314, intron 1 of 8)	intron (NM_000314, intron 1 of 8)	1567	NM_000314	5728	Hs.500466	NM_000314	ENSG00000171862	PTEN	10q23del|BZS|CWS1|DEC|GLM2|MHAM|MMAC1|PTEN1|PTENbeta|TEP1	phosphatase and tensin homolog	protein-coding	4.22	23.9667	33.045	5.06333	4.07	6.01
Merged-chr10-89857128-3	chr10	89856912	89857359	FALSE	TRUE	FALSE	Intergenic	Intergenic	233940	NM_000314	5728	Hs.500466	NM_000314	ENSG00000171862	PTEN	10q23del|BZS|CWS1|DEC|GLM2|MHAM|MMAC1|PTEN1|PTENbeta|TEP1	phosphatase and tensin homolog	protein-coding	1.575	9.59	3.265	1.24333	1.55	2
Merged-chr10-90846718-5	chr10	90846491	90846929	FALSE	TRUE	TRUE	Intergenic	Intergenic	-23542	NR_039827	100616192		NR_039827	ENSG00000265375	MIR4679-2	-	microRNA 4679-2	ncRNA	2.825	25.5167	16.815	1.76	1.55	2.51
Merged-chr10-90898772-2	chr10	90898641	90898891	FALSE	FALSE	TRUE	Intergenic	L2c|LINE|L2	68305	NM_003956	9023	Hs.47357	NM_003956	ENSG00000138135	CH25H	C25H	cholesterol 25-hydroxylase	protein-coding	1.945	3.17333	7.46	1.36667	1.355	2
Merged-chr10-91106484-5	chr10	91106218	91106767	FALSE	TRUE	TRUE	Intergenic	Intergenic	14256	NM_001031683	3437	Hs.47338	NM_001549	ENSG00000119917	IFIT3	CIG-49|GARG-49|IFI60|IFIT4|IRG2|ISG60|P60|RIG-G|cig41	interferon induced protein with tetratricopeptide repeats 3	protein-coding	4.98	24.9167	31.19	3.01333	4.46	2.51
Merged-chr10-91115444-5	chr10	91115291	91115624	FALSE	TRUE	TRUE	Intergenic	MER41B|LTR|ERV1	-22356	NM_001010987	439996	Hs.500491	NM_001010987	ENSG00000204010	IFIT1B	IFIT1L|bA149I23.6	interferon induced protein with tetratricopeptide repeats 1B	protein-coding	2.42	14.8433	8.09	1.64333	0.39	2
Merged-chr10-91133337-3	chr10	91133124	91133573	FALSE	TRUE	FALSE	Intergenic	Intergenic	-4465	NM_001010987	439996	Hs.500491	NM_001010987	ENSG00000204010	IFIT1B	IFIT1L|bA149I23.6	interferon induced protein with tetratricopeptide repeats 1B	protein-coding	3.01	26.1367	13.145	5.66	4.07	4.01
Merged-chr10-91134123-4	chr10	91134000	91134277	FALSE	TRUE	FALSE	Intergenic	Intergenic	-3675	NM_001010987	439996	Hs.500491	NM_001010987	ENSG00000204010	IFIT1B	IFIT1L|bA149I23.6	interferon induced protein with tetratricopeptide repeats 1B	protein-coding	2.42	10.8133	7.185	2.74	2.325	0.5
Merged-chr10-91352923-3	chr10	91352791	91353048	FALSE	TRUE	FALSE	promoter-TSS (NR_029524)	promoter-TSS (NR_029524)	-335	NR_029524	406901		NR_029524	ENSG00000198997	MIR107	MIRN107|miR-107	microRNA 107	ncRNA	2.385	11.6967	4.985	0.406667	0.195	1.5
Merged-chr10-91369843-7	chr10	91369423	91370243	FALSE	TRUE	TRUE	intron (NM_148977, intron 2 of 6)	MIR3|SINE|MIR	-17249	NR_029524	406901		NR_029524	ENSG00000198997	MIR107	MIRN107|miR-107	microRNA 107	ncRNA	4.51	53.7267	30.96	6.58333	4.65	3.51
Merged-chr10-91393421-4	chr10	91393211	91393560	FALSE	TRUE	FALSE	intron (NM_148977, intron 1 of 6)	intron (NM_148977, intron 1 of 6)	10263	NM_148978	53354	Hs.163555	NM_138316	ENSG00000152782	PANK1	PANK	pantothenate kinase 1	protein-coding	2.055	18.9533	5.76	2.6	2.91	1.5
Merged-chr10-91459455-5	chr10	91459272	91459626	FALSE	TRUE	TRUE	Intergenic	L2|LINE|L2	-1764	NR_026835	283011	Hs.679445	NR_026835		FLJ37201	-	tigger transposable element derived 2 pseudogene	pseudo	4.76	31.1067	13.825	4.40333	4.265	2
Merged-chr10-91939646-5	chr10	91939473	91939829	FALSE	TRUE	TRUE	Intergenic	Intergenic	-222521	NR_110655	101926924	Hs.500498	NR_110655	ENSG00000226159	LINC01375	-	long intergenic non-protein coding RNA 1375	ncRNA	1.575	18.24	10.56	1.5	0.585	1.5
Merged-chr10-92482801-4	chr10	92482570	92483121	FALSE	FALSE	TRUE	Intergenic	MLT1G|LTR|ERVL-MaLR	134826	NM_000872	3363	Hs.73739	NM_000872	ENSG00000148680	HTR7	5-HT7	5-hydroxytryptamine receptor 7	protein-coding	2.745	13.83	13.305	2.87667	1.94	2
Merged-chr10-92639879-5	chr10	92639647	92640069	FALSE	TRUE	TRUE	intron (NM_006413, intron 5 of 10)	HY1|scRNA|scRNA	8149	NM_006413	10556	Hs.139120	NM_006413	ENSG00000148688	RPP30	TSG15	ribonuclease P/MRP subunit p30	protein-coding	2.49	13.8433	14.28	3.17667	3.295	1.5
Merged-chr10-92958723-4	chr10	92958546	92958963	FALSE	FALSE	TRUE	intron (NR_046435, intron 1 of 2)	intron (NR_046435, intron 1 of 2)	-21154	NM_001256549	84333	Hs.500512	NM_032373	ENSG00000180628	PCGF5	RNF159	polycomb group ring finger 5	protein-coding	2.42	12.8167	10.065	1.76667	1.94	3.51
Merged-chr10-93059992-5	chr10	93059778	93060199	FALSE	TRUE	TRUE	Intergenic	Intergenic	79629	NR_046310	84333	Hs.500512	NM_032373	ENSG00000180628	PCGF5	RNF159	polycomb group ring finger 5	protein-coding	2.09	11.09	11.99	0.96	0.78	1.5
Merged-chr10-93193916-5	chr10	93193574	93194369	FALSE	TRUE	TRUE	intron (NM_173497, intron 2 of 4)	intron (NM_173497, intron 2 of 4)	23929	NM_182765	143279	Hs.596096	NM_173497	ENSG00000165338	HECTD2	-	HECT domain E3 ubiquitin protein ligase 2	protein-coding	4.035	44.1067	18.405	5.49667	4.455	2.51
Merged-chr10-93368549-7	chr10	93367655	93369125	TRUE	TRUE	TRUE	intron (NR_024467, intron 1 of 4)	intron (NR_024467, intron 1 of 4)	2827	NR_024467	100188947	Hs.535293	NR_024467		HECTD2-AS1	-	HECTD2 antisense RNA 1	ncRNA	14.25	99.2467	60.155	6.58333	7.95	6.01
Merged-chr10-93449563-4	chr10	93449374	93449723	FALSE	FALSE	TRUE	Intergenic	L2b|LINE|L2	-56690	NM_005398	5507	Hs.303090	NM_005398	ENSG00000119938	PPP1R3C	PPP1R5|PTG	protein phosphatase 1 regulatory subunit 3C	protein-coding	0.995	6.79667	10.835	0.543333	1.355	1
Merged-chr10-93466206-5	chr10	93465843	93466515	TRUE	TRUE	FALSE	Intergenic	Intergenic	-73321	NM_005398	5507	Hs.303090	NM_005398	ENSG00000119938	PPP1R3C	PPP1R5|PTG	protein phosphatase 1 regulatory subunit 3C	protein-coding	11.125	52.02	22.42	6.27333	3.295	6.01
Merged-chr10-93998525-4	chr10	93998129	93998824	FALSE	FALSE	TRUE	intron (NM_001178137, intron 2 of 9)	intron (NM_001178137, intron 2 of 9)	4560	NM_001178137	22849	Hs.131683	NM_014912	ENSG00000107864	CPEB3	-	cytoplasmic polyadenylation element binding protein 3	protein-coding	3.895	40.1167	26.52	9.17	5.235	6.01
Merged-chr10-94087732-5	chr10	94087423	94088013	FALSE	TRUE	TRUE	intron (NM_017824, intron 2 of 5)	L1MC3|LINE|L1	36798	NM_017824	54708	Hs.573490	NM_017824	ENSG00000198060	MARCH5	MARCH-V|MITOL|RNF153	membrane associated ring-CH-type finger 5	protein-coding	8.03	49.2767	25.705	5.61	3.685	5.51
Merged-chr10-94088934-4	chr10	94088581	94089164	FALSE	TRUE	FALSE	intron (NM_017824, intron 2 of 5)	intron (NM_017824, intron 2 of 5)	37952	NM_017824	54708	Hs.573490	NM_017824	ENSG00000198060	MARCH5	MARCH-V|MITOL|RNF153	membrane associated ring-CH-type finger 5	protein-coding	3.225	28.1133	13.465	2.87333	3.875	3.01
Merged-chr10-94428840-3	chr10	94428663	94428990	FALSE	FALSE	TRUE	Intergenic	Intergenic	-20855	NM_002729	3087	Hs.118651	NM_002729	ENSG00000152804	HHEX	HEX|HMPH|HOX11L-PEN|PRH|PRHX	hematopoietically expressed homeobox	protein-coding	2.165	5.27	7.75	0.956667	0.39	3.01
Merged-chr10-94501836-4	chr10	94501594	94502102	FALSE	FALSE	TRUE	Intergenic	Intergenic	52167	NM_002729	3087	Hs.118651	NM_002729	ENSG00000152804	HHEX	HEX|HMPH|HOX11L-PEN|PRH|PRHX	hematopoietically expressed homeobox	protein-coding	2.305	19.0067	14.55	3.28333	2.715	1
Merged-chr10-94792131-5	chr10	94791803	94792364	FALSE	TRUE	TRUE	intron (NM_001013848, intron 21 of 22)	AluJo|SINE|Alu	-28938	NM_183374	340665	Hs.369993	NM_183374	ENSG00000187553	CYP26C1	FFDD4	cytochrome P450 family 26 subfamily C member 1	protein-coding	4.355	22.3967	14.145	3.26667	2.905	4.51
Merged-chr10-94865917-3	chr10	94865685	94866124	FALSE	TRUE	FALSE	Intergenic	AluSq2|SINE|Alu	32257	NM_000783	1592	Hs.150595	NM_000783	ENSG00000095596	CYP26A1	CP26|CYP26|P450RAI|P450RAI1	cytochrome P450 family 26 subfamily A member 1	protein-coding	2.71	16.7	6.845	3.01333	3.49	2.51
Merged-chr10-94866727-5	chr10	94866482	94866987	FALSE	TRUE	TRUE	Intergenic	Intergenic	33087	NM_000783	1592	Hs.150595	NM_000783	ENSG00000095596	CYP26A1	CP26|CYP26|P450RAI|P450RAI1	cytochrome P450 family 26 subfamily A member 1	protein-coding	7.31	43.7567	24.84	4.25667	6.01	0.5
Merged-chr10-95531309-4	chr10	95531103	95531656	FALSE	FALSE	TRUE	intron (NR_131777, intron 2 of 5)	L1PB4|LINE|L1	13813	NM_005097	9211	Hs.533670	NM_005097	ENSG00000108231	LGI1	ADLTE|ADPAEF|ADPEAF|EPITEMPIN|EPT|ETL1|IB1099	leucine rich glioma inactivated 1	protein-coding	4.645	23.62	19.04	2.72333	1.935	2.51
Merged-chr10-96231737-3	chr10	96231539	96231943	FALSE	FALSE	TRUE	intron (NM_015188, intron 2 of 12)	intron (NM_015188, intron 2 of 12)	69555	NM_015188	23232	Hs.500598	NM_015188	ENSG00000108239	TBC1D12	-	TBC1 domain family member 12	protein-coding	0.995	5.58	9.045	1.51333	1.745	0.5
Merged-chr10-96433506-4	chr10	96433288	96433723	FALSE	FALSE	TRUE	Intergenic	HERVL74-int|LTR|ERVL	-9746	NM_001128925	1562	Hs.511872	NM_000772	ENSG00000108242	CYP2C18	CPCI|CYP2C|CYP2C17|P450-6B/29C|P450IIC17	cytochrome P450 family 2 subfamily C member 18	protein-coding	1.43	24.77	14.19	4.37333	1.165	2
Merged-chr10-96440472-5	chr10	96440278	96440651	FALSE	TRUE	TRUE	Intergenic	Intergenic	-2787	NM_001128925	1562	Hs.511872	NM_000772	ENSG00000108242	CYP2C18	CPCI|CYP2C|CYP2C17|P450-6B/29C|P450IIC17	cytochrome P450 family 2 subfamily C member 18	protein-coding	5.35	44.5567	25.5	4.38	2.71	2
Merged-chr10-96662653-5	chr10	96662381	96663010	FALSE	TRUE	TRUE	Intergenic	MIRc|SINE|MIR	-35720	NM_000771	1559	Hs.282624	NM_000771	ENSG00000138109	CYP2C9	CPC9|CYP2C|CYP2C10|CYPIIC9|P450IIC9	cytochrome P450 family 2 subfamily C member 9	protein-coding	4.685	73.9967	33.095	6.57667	5.23	4.01
Merged-chr10-97033499-4	chr10	97033131	97033826	FALSE	TRUE	FALSE	intron (NM_020992, intron 1 of 6)	intron (NM_020992, intron 1 of 6)	17427	NM_020992	9124	Hs.368525	NM_020992	ENSG00000107438	PDLIM1	CLIM1|CLP-36|CLP36|HEL-S-112|hCLIM1	PDZ and LIM domain 1	protein-coding	10.18	31.41	12.85	8.1	7.17	4.51
Merged-chr10-97040645-5	chr10	97040471	97040803	FALSE	TRUE	TRUE	intron (NM_020992, intron 1 of 6)	intron (NM_020992, intron 1 of 6)	10268	NM_020992	9124	Hs.368525	NM_020992	ENSG00000107438	PDLIM1	CLIM1|CLP-36|CLP36|HEL-S-112|hCLIM1	PDZ and LIM domain 1	protein-coding	3.31	16.3167	9.25	2.19333	2.13	1.5
Merged-chr10-97106753-4	chr10	97106489	97107021	FALSE	FALSE	TRUE	intron (NM_006434, intron 14 of 20)	intron (NM_006434, intron 14 of 20)	-55850	NM_020992	9124	Hs.368525	NM_020992	ENSG00000107438	PDLIM1	CLIM1|CLP-36|CLP36|HEL-S-112|hCLIM1	PDZ and LIM domain 1	protein-coding	5.35	29.93	19.535	5.89333	6.98	3.01
Merged-chr10-97148485-4	chr10	97148301	97148664	FALSE	TRUE	FALSE	intron (NM_001034955, intron 12 of 30)	intron (NM_001034955, intron 12 of 30)	52455	NM_001034955	10580	Hs.38621	NM_006434	ENSG00000095637	SORBS1	CAP|FLAF2|R85FL|SH3D5|SH3P12|SORB1	sorbin and SH3 domain containing 1	protein-coding	4.08	23.76	10.085	3.15	4.845	3.51
Merged-chr10-97624981-5	chr10	97624770	97625172	FALSE	TRUE	TRUE	intron (NM_001320916, intron 9 of 9)	intron (NM_001320916, intron 9 of 9)	-42751	NM_001130446	387707	Hs.652240	NM_001001732	ENSG00000188649	CC2D2B	C10orf130|C10orf131	coiled-coil and C2 domain containing 2B	protein-coding	3.04	31.5433	14.095	3.54	2.715	4.01
Merged-chr10-97736152-3	chr10	97736013	97736303	FALSE	TRUE	FALSE	intron (NM_001349008, intron 17 of 34)	intron (NM_001349008, intron 17 of 34)	-23690	NM_001159747	387707	Hs.652240	NM_001001732	ENSG00000188649	CC2D2B	C10orf130|C10orf131	coiled-coil and C2 domain containing 2B	protein-coding	1.545	16.56	6.12	2.06333	2.13	1.5
Merged-chr10-97853044-5	chr10	97852830	97853336	FALSE	TRUE	TRUE	Intergenic	Intergenic	-3091	NR_134320	728558	Hs.538374	NR_038444	ENSG00000226688	ENTPD1-AS1	-	ENTPD1 antisense RNA 1	ncRNA	2.93	34.0733	22.19	4.63333	4.46	2.51
Merged-chr10-97884770-5	chr10	97884289	97885247	FALSE	TRUE	TRUE	Intergenic	L1M4c|LINE|L1	-4704	NM_014803	9849	Hs.600823	NM_014803	ENSG00000177853	ZNF518A	ZNF518	zinc finger protein 518A	protein-coding	11.485	95.95	45.675	9.73333	7.95	8.02
Merged-chr10-98600884-6	chr10	98600559	98601259	TRUE	TRUE	TRUE	intron (NM_001346516, intron 2 of 7)	AluJb|SINE|Alu	8197	NM_032440	84458	Hs.427927	NM_015652	ENSG00000196233	LCOR	C10orf12|MLR2	ligand dependent nuclear receptor corepressor	protein-coding	11.125	38.8267	23.82	8.08667	5.815	4.01
Merged-chr10-98603066-5	chr10	98602651	98603341	FALSE	TRUE	TRUE	intron (NM_001346516, intron 2 of 7)	AluJr4|SINE|Alu	10284	NM_032440	84458	Hs.427927	NM_015652	ENSG00000196233	LCOR	C10orf12|MLR2	ligand dependent nuclear receptor corepressor	protein-coding	7.11	40.51	24.005	8.66	7.755	5.01
Merged-chr10-98829891-5	chr10	98829625	98830077	FALSE	TRUE	TRUE	intron (NM_003061, intron 4 of 36)	MLT1F1|LTR|ERVL-MaLR	-32662	NR_038330	100505540	Hs.568878	NR_038330	ENSG00000234855	SLIT1-AS1	-	SLIT1 antisense RNA 1	ncRNA	2.09	16.6533	9.905	2.06333	1.55	2
Merged-chr10-99205060-3	chr10	99204947	99205168	FALSE	FALSE	TRUE	promoter-TSS (NR_109895)	promoter-TSS (NR_109895)	717	NM_001318365	51013	Hs.632089	NM_016046	ENSG00000171311	EXOSC1	CGI-108|CSL4|Csl4p|SKI4|Ski4p|p13	exosome component 1	protein-coding	1.575	5.14667	6.71	2.06	2.325	1
Merged-chr10-99320990-5	chr10	99320614	99321306	FALSE	TRUE	TRUE	intron (NM_024954, intron 1 of 2)	Harlequin-int|LTR|ERV1	-11238	NM_001291218	26287	Hs.73708	NM_020349	ENSG00000165887	ANKRD2	ARPP	ankyrin repeat domain 2	protein-coding	7.98	30.61	29.785	4.51667	4.845	8.52
Merged-chr10-99459976-5	chr10	99459811	99460116	FALSE	TRUE	TRUE	Intergenic	LTR5A|LTR|ERVK	-12948	NM_021732	60370	Hs.23918	NM_021732	ENSG00000119986	AVPI1	PP5395|VIP32|VIT32	arginine vasopressin induced 1	protein-coding	1.025	7.07667	5.235	1.22333	0.585	2.51
Merged-chr10-99570402-5	chr10	99569923	99570788	FALSE	TRUE	TRUE	Intergenic	MLT1L|LTR|ERVL-MaLR	-38599	NM_003015	6425	Hs.279565	NM_003015	ENSG00000120057	SFRP5	SARP3	secreted frizzled related protein 5	protein-coding	2.855	38.5967	17.29	4.67	3.49	3.01
Merged-chr10-100019927-5	chr10	100019708	100020136	FALSE	TRUE	TRUE	intron (NM_032211, intron 4 of 14)	intron (NM_032211, intron 4 of 14)	8085	NM_032211	84171	Hs.306814	NM_032211	ENSG00000138131	LOXL4	LOXC	lysyl oxidase like 4	protein-coding	3.515	14.9567	13.735	2.03667	2.52	3.51
Merged-chr10-100030272-5	chr10	100030091	100030442	FALSE	TRUE	TRUE	Intergenic	MIR|SINE|MIR	-2259	NM_032211	84171	Hs.306814	NM_032211	ENSG00000138131	LOXL4	LOXC	lysyl oxidase like 4	protein-coding	4.715	30.0667	15.66	3.44	2.91	2.51
Merged-chr10-100220798-4	chr10	100220585	100221082	FALSE	TRUE	FALSE	intron (NM_001166244, intron 10 of 10)	intron (NM_001166244, intron 10 of 10)	-14113	NM_001322481	3257	Hs.404568	NM_000195	ENSG00000107521	HPS1	BLOC3S1|HPS	HPS1, biogenesis of lysosomal organelles complex 3 subunit 1	protein-coding	2.49	28.74	11.9	5.58	6.205	5.51
Merged-chr10-100879216-4	chr10	100879061	100879457	FALSE	FALSE	TRUE	intron (NM_001166246, intron 3 of 12)	L1PA13|LINE|L1	116373	NM_001166244	60495	Hs.500750	NM_021828	ENSG00000172987	HPSE2	HPA2|HPR2|UFS|UFS1	heparanase 2 (inactive)	protein-coding	2.93	7.07667	10.335	1.37	1.555	1.5
Merged-chr10-101190602-5	chr10	101190383	101191035	FALSE	TRUE	TRUE	promoter-TSS (NM_002079)	promoter-TSS (NM_002079)	-179	NM_002079	2805	Hs.500756	NM_002079	ENSG00000120053	GOT1	AST1|ASTQTL1|GIG18|cAspAT|cCAT	glutamic-oxaloacetic transaminase 1	protein-coding	9.295	51.1367	37.465	8.10333	6.59	5.51
Merged-chr10-101381494-5	chr10	101381223	101381834	FALSE	TRUE	TRUE	Intergenic	Intergenic	-1307	NM_031212	81894	Hs.403790	NM_031212	ENSG00000155287	SLC25A28	MFRN2|MRS3/4|MRS4L|NPD016	solute carrier family 25 member 28	protein-coding	6.305	29.8667	29.715	7.28333	4.265	6.01
Merged-chr10-101908497-3	chr10	101908220	101908808	FALSE	TRUE	FALSE	Intergenic	Intergenic	37220	NM_001347860	10613	Hs.150087	NM_006459	ENSG00000107566	ERLIN1	C10orf69|Erlin-1|KE04|KEO4|SPFH1|SPG62	ER lipid raft associated 1	protein-coding	2.055	28.3933	8.59	5.07333	0.97	4.01
Merged-chr10-101923705-5	chr10	101923422	101924054	FALSE	TRUE	TRUE	intron (NR_144757, intron 7 of 10)	intron (NR_144757, intron 7 of 10)	21996	NM_001347860	10613	Hs.150087	NM_006459	ENSG00000107566	ERLIN1	C10orf69|Erlin-1|KE04|KEO4|SPFH1|SPG62	ER lipid raft associated 1	protein-coding	5.245	36.1333	30.645	5.77333	3.875	3.51
Merged-chr10-101943572-5	chr10	101943232	101943915	FALSE	TRUE	FALSE	non-coding (NR_144756, exon 3 of 11)	non-coding (NR_144756, exon 3 of 11)	2161	NM_001347860	10613	Hs.150087	NM_006459	ENSG00000107566	ERLIN1	C10orf69|Erlin-1|KE04|KEO4|SPFH1|SPG62	ER lipid raft associated 1	protein-coding	6.305	31.2167	15.28	6.02667	5.425	8.02
Merged-chr10-102051244-4	chr10	102050959	102051474	FALSE	TRUE	FALSE	intron (NM_001253837, intron 11 of 15)	intron (NM_001253837, intron 11 of 15)	-4747	NM_001282439	282991	Hs.34906	NM_173809	ENSG00000196072	BLOC1S2	BLOS2|BORCS2|CEAP|CEAP11	biogenesis of lysosomal organelles complex 1 subunit 2	protein-coding	4.245	20.16	13.105	4.53667	3.88	5.01
Merged-chr10-102133746-5	chr10	102133428	102134055	FALSE	TRUE	TRUE	non-coding (NR_026762, exon 1 of 3)	non-coding (NR_026762, exon 1 of 3)	408	NR_026762	90271	Hs.628088	NR_026762	ENSG00000235823	OLMALINC	C10orf75|HI-LNC80|LINC00263|NCRNA00263|OLMALINCAS	oligodendrocyte maturation-associated long intergenic non-coding RNA	ncRNA	12.815	48.59	51.95	8.36	8.145	6.52
Merged-chr10-102872914-6	chr10	102872471	102873315	TRUE	TRUE	TRUE	intron (NR_130723, intron 2 of 2)	intron (NR_130723, intron 2 of 2)	18010	NR_130723	100038246	Hs.368784	NM_001085398	ENSG00000236311	TLX1NB	APT-B7|TD1|TDI	TLX1 neighbor	ncRNA	13.545	98.2167	33.32	6.55	6.4	5.51
Merged-chr10-103035155-4	chr10	103034852	103035439	FALSE	FALSE	TRUE	Intergenic	AluJb|SINE|Alu	-11838	NR_120621	101927419	Hs.638503	NR_120621	ENSG00000229649	LOC101927419	-	uncharacterized LOC101927419	ncRNA	2.595	16.2633	15.66	2.88667	2.52	3.51
Merged-chr10-103124628-4	chr10	103124467	103124791	FALSE	TRUE	FALSE	intron (NM_003939, intron 1 of 13)	U2|snRNA|snRNA	10839	NM_033637	8945	Hs.643802	NM_003939	ENSG00000166167	BTRC	BETA-TRCP|FBW1A|FBXW1|FBXW1A|FWD1|bTrCP|bTrCP1|betaTrCP	beta-transducin repeat containing E3 ubiquitin protein ligase	protein-coding	28.52	94.3167	42.025	35.0167	26.755	8.52
Merged-chr10-103549682-4	chr10	103549523	103549871	FALSE	TRUE	FALSE	intron (NM_012215, intron 14 of 15)	AluJb|SINE|Alu	-6527	NM_006993	10360	Hs.90691	NM_006993	ENSG00000107833	NPM3	PORMIN|TMEM123	nucleophosmin/nucleoplasmin 3	protein-coding	2.49	16.08	8.41	1.63667	0.585	3.01
Merged-chr10-103699139-5	chr10	103698899	103699484	FALSE	TRUE	TRUE	intron (NM_024541, intron 23 of 25)	intron (NM_024541, intron 23 of 25)	-95514	NM_173193	30819	Hs.97044	NM_014591	ENSG00000120049	KCNIP2	KCHIP2	potassium voltage-gated channel interacting protein 2	protein-coding	1.795	29.5733	11.695	2.33	2.13	1.5
Merged-chr10-103891239-3	chr10	103891082	103891498	FALSE	FALSE	TRUE	Intergenic	L1M5|LINE|L1	-1461	NM_015062	23082	Hs.533551	NM_015062	ENSG00000148840	PPRC1	PRC	peroxisome proliferator-activated receptor gamma, coactivator-related 1	protein-coding	2.275	10.41	11.065	3.01667	1.745	3.01
Merged-chr10-104157745-2	chr10	104157606	104157865	FALSE	FALSE	TRUE	intron (NM_001077494, intron 8 of 22)	intron (NM_001077494, intron 8 of 22)	2382	NM_001261403	4791	Hs.73090	NM_002502	ENSG00000077150	NFKB2	CVID10|H2TF1|LYT-10|LYT10|NF-kB2|p100|p49/p100|p52	nuclear factor kappa B subunit 2	protein-coding	0.84	4.34333	8.14	0.81	0.585	0.5
Merged-chr10-104215809-5	chr10	104215601	104216030	FALSE	TRUE	TRUE	non-coding (NR_038937, exon 5 of 5)	non-coding (NR_038937, exon 5 of 5)	-4515	NM_024886	79946	Hs.225084	NM_024886		C10orf95	-	chromosome 10 open reading frame 95	protein-coding	0.96	20.61	12.785	2.33667	0.97	0.5
Merged-chr10-104430000-5	chr10	104429702	104430261	FALSE	TRUE	TRUE	Intergenic	MIRb|SINE|MIR	25729	NM_030912	81603	Hs.336810	NM_030912	ENSG00000171206	TRIM8	GERP|RNF27	tripartite motif containing 8	protein-coding	2.525	20.2133	15.775	4.79	4.075	3.01
Merged-chr10-104610021-4	chr10	104609859	104610270	FALSE	TRUE	FALSE	Intergenic	MLT1F2|LTR|ERVL-MaLR	-3903	NM_144591	119032	Hs.34492	NM_144591	ENSG00000166275	BORCS7	C10orf32	BLOC-1 related complex subunit 7	protein-coding	4.98	28.9633	10.355	3.99	3.295	4.51
Merged-chr10-104625578-5	chr10	104625410	104625748	FALSE	TRUE	TRUE	TTS (NM_001136200)	TTS (NM_001136200)	-3631	NM_020682	57412	Hs.720370	NM_020682	ENSG00000214435	AS3MT	CYT19	arsenite methyltransferase	protein-coding	2.67	20.5233	20.49	1.79333	1.94	1.5
Merged-chr10-104640228-2	chr10	104640085	104640361	FALSE	FALSE	TRUE	intron (NM_020682, intron 9 of 10)	intron (NM_020682, intron 9 of 10)	11013	NM_020682	57412	Hs.720370	NM_020682	ENSG00000214435	AS3MT	CYT19	arsenite methyltransferase	protein-coding	1.65	5.99333	9.405	1.23333	1.745	2
Merged-chr10-104676473-4	chr10	104676306	104676635	FALSE	FALSE	TRUE	Intergenic	L2a|LINE|L2	-1605	NM_017649	54805	Hs.643509	NM_017649	ENSG00000148842	CNNM2	ACDP2|HOMG6|HOMGSMR	cyclin and CBS domain divalent metal cation transport mediator 2	protein-coding	2.67	13.4133	9.52	3.02333	4.65	3.51
Merged-chr10-104785711-5	chr10	104785360	104785947	FALSE	TRUE	TRUE	intron (NM_017649, intron 1 of 7)	MSTD|LTR|ERVL-MaLR	107578	NM_199076	54805	Hs.643509	NM_017649	ENSG00000148842	CNNM2	ACDP2|HOMG6|HOMGSMR	cyclin and CBS domain divalent metal cation transport mediator 2	protein-coding	5.025	31.3033	14.62	5.2	4.455	6.52
Merged-chr10-104964816-5	chr10	104964449	104965321	FALSE	TRUE	TRUE	Intergenic	MamRep1527|LTR|LTR	-11822	NM_001351197	22978	Hs.97439	NM_012229	ENSG00000076685	NT5C2	GMP|NT5B|PNT5|SPG45|SPG65|cN-II	5'-nucleotidase, cytosolic II	protein-coding	9.945	49.99	29.805	8.78333	9.11	9.02
Merged-chr10-104991171-5	chr10	104990760	104991588	FALSE	TRUE	FALSE	Intergenic	Intergenic	-14470	NM_001143909	729020	Hs.458437	NM_001143909	ENSG00000235376	RPEL1	-	ribulose-5-phosphate-3-epimerase like 1	protein-coding	7.87	46.1367	19.47	7.82	9.11	5.51
Merged-chr10-104993073-5	chr10	104992848	104993316	FALSE	TRUE	TRUE	Intergenic	AluJb|SINE|Alu	-12562	NM_001143909	729020	Hs.458437	NM_001143909	ENSG00000235376	RPEL1	-	ribulose-5-phosphate-3-epimerase like 1	protein-coding	6.26	29.6633	18.085	5.34667	5.235	3.01
Merged-chr10-105111127-4	chr10	105110981	105111324	FALSE	TRUE	FALSE	promoter-TSS (NM_032154)	promoter-TSS (NM_032154)	-261	NM_001011663	84108	Hs.335808	NM_032154	ENSG00000156374	PCGF6	MBLR|RNF134	polycomb group ring finger 6	protein-coding	4.29	16.02	11.065	3.29667	4.265	6.52
Merged-chr10-105287370-4	chr10	105287174	105287580	FALSE	TRUE	FALSE	intron (NM_004210, intron 1 of 5)	MER41B|LTR|ERV1	-10178	NR_120675	102724341	Hs.599425	NR_120675	ENSG00000235470	NEURL1-AS1	-	NEURL1 antisense RNA 1	ncRNA	0.405	25.6067	9.77	3.83	0.585	2.51
Merged-chr10-105456813-5	chr10	105456615	105457018	FALSE	TRUE	TRUE	intron (NM_014631, intron 5 of 13)	intron (NM_014631, intron 5 of 13)	-49721	NR_038940	100505839	Hs.655149	NR_038940	ENSG00000280693	SH3PXD2A-AS1	-	SH3PXD2A antisense RNA 1	ncRNA	2.275	11.5667	9.995	1.10333	0.78	1
Merged-chr10-105593628-4	chr10	105593454	105593745	FALSE	TRUE	FALSE	intron (NM_014631, intron 1 of 13)	intron (NM_014631, intron 1 of 13)	21565	NM_014631	9644	Hs.678727	NM_014631	ENSG00000107957	SH3PXD2A	FISH|SH3MD1|TKS5	SH3 and PX domains 2A	protein-coding	2.605	8.54	5.825	1.38	1.745	1.5
Merged-chr10-105609754-5	chr10	105609530	105609915	FALSE	TRUE	TRUE	intron (NM_014631, intron 1 of 13)	intron (NM_014631, intron 1 of 13)	5442	NM_014631	9644	Hs.678727	NM_014631	ENSG00000107957	SH3PXD2A	FISH|SH3MD1|TKS5	SH3 and PX domains 2A	protein-coding	2.055	22.71	10.085	2.47333	2.325	2
Merged-chr10-106089174-5	chr10	106088946	106089441	FALSE	TRUE	TRUE	promoter-TSS (NM_001272012)	promoter-TSS (NM_001272012)	-443	NM_001272012	85450	Hs.523252	NM_033397	ENSG00000148841	ITPRIP	DANGER|KIAA1754|bA127L20|bA127L20.2	inositol 1,4,5-trisphosphate receptor interacting protein	protein-coding	4.205	37.9933	16.84	6	3.295	3.51
Merged-chr10-106109685-6	chr10	106109166	106110373	FALSE	TRUE	TRUE	Intergenic	L2b|LINE|L2	3564	NR_108036	100505869	Hs.338140	NR_108036		CFAP58-DT	CCDC147-AS1|CFAP58-AS1	CFAP58 divergent transcript	ncRNA	13.11	70.9233	53.74	9.71333	7.56	8.52
Merged-chr10-106151264-4	chr10	106151049	106151484	FALSE	TRUE	FALSE	intron (NM_001008723, intron 9 of 17)	intron (NM_001008723, intron 9 of 17)	37744	NM_001008723	159686	Hs.253576	NM_001008723	ENSG00000120051	CFAP58	C10orf80|CCDC147|bA127L20.4|bA127L20.5|bA554P13.1	cilia and flagella associated protein 58	protein-coding	2.015	19.95	9.59	2.58667	1.745	4.51
Merged-chr10-106337922-5	chr10	106337778	106338060	FALSE	TRUE	TRUE	Intergenic	Intergenic	-62940	NM_014978	22986	Hs.671950	NM_014978	ENSG00000156395	SORCS3	SORCS	sortilin related VPS10 domain containing receptor 3	protein-coding	1.025	10.0367	8.205	1.23667	0.195	1
Merged-chr10-109040306-3	chr10	109040162	109040462	FALSE	TRUE	FALSE	Intergenic	Intergenic	-115846	NM_001013031	114815	Hs.591915	NM_052918	ENSG00000108018	SORCS1	hSorCS	sortilin related VPS10 domain containing receptor 1	protein-coding	1.36	7.32	3.875	0.68	0.78	0.5
Merged-chr10-111727325-4	chr10	111727144	111727545	FALSE	TRUE	FALSE	intron (NR_038943, intron 2 of 4)	intron (NR_038943, intron 2 of 4)	-28764	NM_001320591	120	Hs.501012	NM_001121	ENSG00000148700	ADD3	ADDL|CPSQ3	adducin 3	protein-coding	5.2	22.9767	10.065	3.83	3.49	1
Merged-chr10-111970724-4	chr10	111970509	111970942	FALSE	FALSE	TRUE	intron (NM_001008541, intron 1 of 4)	intron (NM_001008541, intron 1 of 4)	736	NM_001008541	4601	Hs.602078	NM_005962	ENSG00000119950	MXI1	MAD2|MXD2|MXI|bHLHc11	MAX interactor 1, dimerization protein	protein-coding	5.635	17.7433	14.26	2.46	3.295	2
Merged-chr10-112159122-5	chr10	112158806	112159349	FALSE	TRUE	TRUE	Intergenic	MIRb|SINE|MIR	-94370	NM_005871	10285	Hs.632093	NM_005871	ENSG00000119953	SMNDC1	SMNR|SPF30|TDRD16C	survival motor neuron domain containing 1	protein-coding	3.26	33.1733	13.035	3.98333	2.52	4.51
Merged-chr10-112511388-3	chr10	112511168	112511558	FALSE	FALSE	TRUE	intron (NM_001134363, intron 1 of 13)	MIR|SINE|MIR	107208	NM_001134363	282996	Hs.116630	NM_001134363	ENSG00000203867	RBM20	-	RNA binding motif protein 20	protein-coding	2.015	6.49667	8.16	1.23333	1.745	3.51
Merged-chr10-112511933-5	chr10	112511700	112512297	FALSE	TRUE	TRUE	intron (NM_001134363, intron 1 of 13)	L1MC1|LINE|L1	107843	NM_001134363	282996	Hs.116630	NM_001134363	ENSG00000203867	RBM20	-	RNA binding motif protein 20	protein-coding	2.12	32.59	14.685	3.27	3.1	3.51
Merged-chr10-112525444-5	chr10	112525256	112525808	FALSE	TRUE	TRUE	intron (NM_001134363, intron 1 of 13)	intron (NM_001134363, intron 1 of 13)	105130	NR_026932	282997	Hs.599931	NR_026932		PDCD4-AS1	-	PDCD4 antisense RNA 1	ncRNA	2.64	24.1467	17.43	3.69	1.555	5.51
Merged-chr10-112583760-3	chr10	112583525	112583967	FALSE	FALSE	TRUE	intron (NM_001134363, intron 12 of 13)	AluJo|SINE|Alu	46916	NR_026932	282997	Hs.599931	NR_026932		PDCD4-AS1	-	PDCD4 antisense RNA 1	ncRNA	1.575	7.56667	10.47	1.64333	1.36	1.5
Merged-chr10-112632636-5	chr10	112632386	112632928	FALSE	TRUE	TRUE	intron (NM_014456, intron 1 of 11)	intron (NM_014456, intron 1 of 11)	1104	NM_001199492	27250	Hs.711490	NM_014456	ENSG00000150593	PDCD4	H731	programmed cell death 4	protein-coding	3.565	29.81	18.63	5.5	4.46	7.02
Merged-chr10-112641813-3	chr10	112641598	112641999	FALSE	TRUE	FALSE	intron (NM_014456, intron 3 of 11)	L2a|LINE|L2	10245	NM_001199492	27250	Hs.711490	NM_014456	ENSG00000150593	PDCD4	H731	programmed cell death 4	protein-coding	3.04	14.87	9.045	2.61	2.135	1
Merged-chr10-112662254-5	chr10	112661930	112662651	FALSE	TRUE	TRUE	intron (NM_001243783, intron 1 of 2)	intron (NM_001243783, intron 1 of 2)	4442	NR_039828	100616113		NR_039828	ENSG00000284482	MIR4680	-	microRNA 4680	ncRNA	4.83	49.3267	26.79	3.16667	2.91	6.52
Merged-chr10-112684003-3	chr10	112683790	112684169	FALSE	TRUE	FALSE	intron (NR_136749, intron 1 of 7)	L2c|LINE|L2	4678	NM_001324337	8036	Hs.104315	NM_007373	ENSG00000108061	SHOC2	SIAA0862|SOC2|SUR8	SHOC2, leucine rich repeat scaffold protein	protein-coding	2.275	21.5633	12.355	4.12333	4.075	2
Merged-chr10-113339530-4	chr10	113339382	113339676	FALSE	FALSE	TRUE	Intergenic	ERVL-B4-int|LTR|ERVL	502739	NM_000681	150	Hs.249159	NM_000681	ENSG00000150594	ADRA2A	ADRA2|ADRA2R|ADRAR|ALPHA2AAR|ZNF32	adrenoceptor alpha 2A	protein-coding	1.945	9.81	9.54	0.83	1.165	1
Merged-chr10-113516537-5	chr10	113516274	113516926	FALSE	TRUE	TRUE	Intergenic	Intergenic	426937	NM_001244949	57678	Hs.42586	NM_020918	ENSG00000119927	GPAM	GPAT|GPAT1	glycerol-3-phosphate acyltransferase, mitochondrial	protein-coding	6.48	38.0467	27.995	4.78667	3.685	6.01
Merged-chr10-113732027-4	chr10	113731845	113732187	FALSE	TRUE	FALSE	Intergenic	FordPrefect|DNA|hAT-Tip100	211521	NM_001244949	57678	Hs.42586	NM_020918	ENSG00000119927	GPAM	GPAT|GPAT1	glycerol-3-phosphate acyltransferase, mitochondrial	protein-coding	2.055	23.4733	7.095	1.64333	0.585	0
Merged-chr10-113816530-3	chr10	113816385	113816682	FALSE	TRUE	FALSE	Intergenic	Intergenic	127004	NM_001244949	57678	Hs.42586	NM_020918	ENSG00000119927	GPAM	GPAT|GPAT1	glycerol-3-phosphate acyltransferase, mitochondrial	protein-coding	2.745	20.56	8.385	3.01333	1.745	1
Merged-chr10-113975357-4	chr10	113975126	113975671	FALSE	FALSE	TRUE	Intergenic	Intergenic	-31861	NM_020918	57678	Hs.42586	NM_020918	ENSG00000119927	GPAM	GPAT|GPAT1	glycerol-3-phosphate acyltransferase, mitochondrial	protein-coding	2.755	13.27	15.345	2.33	2.135	1.5
Merged-chr10-113991677-5	chr10	113991453	113991898	FALSE	TRUE	TRUE	Intergenic	Intergenic	-48138	NM_020918	57678	Hs.42586	NM_020918	ENSG00000119927	GPAM	GPAT|GPAT1	glycerol-3-phosphate acyltransferase, mitochondrial	protein-coding	3.41	35.4633	19.38	5.11333	3.685	2.51
Merged-chr10-114021416-5	chr10	114020991	114021917	FALSE	TRUE	TRUE	Intergenic	Intergenic	-21960	NM_058222	6975	Hs.345485	NM_058222	ENSG00000119913	TECTB	-	tectorin beta	protein-coding	12.785	68.13	33.705	12.7433	12.02	8.02
Merged-chr10-114025841-5	chr10	114025535	114026016	FALSE	TRUE	TRUE	Intergenic	Intergenic	-17639	NM_058222	6975	Hs.345485	NM_058222	ENSG00000119913	TECTB	-	tectorin beta	protein-coding	5.2	20.7667	16.23	4.38	2.715	1.5
Merged-chr10-114031966-5	chr10	114031699	114032224	FALSE	TRUE	TRUE	Intergenic	Intergenic	-11453	NM_058222	6975	Hs.345485	NM_058222	ENSG00000119913	TECTB	-	tectorin beta	protein-coding	2.275	30.4467	25.545	3.41333	2.715	2
Merged-chr10-114035912-6	chr10	114035674	114036368	TRUE	TRUE	TRUE	Intergenic	MIRb|SINE|MIR	-7393	NM_058222	6975	Hs.345485	NM_058222	ENSG00000119913	TECTB	-	tectorin beta	protein-coding	23.39	92.9433	43.11	8.19333	7.95	8.02
Merged-chr10-114040173-4	chr10	114039832	114040663	FALSE	TRUE	FALSE	Intergenic	Intergenic	-3167	NM_058222	6975	Hs.345485	NM_058222	ENSG00000119913	TECTB	-	tectorin beta	protein-coding	9.565	39.2667	20.465	9.42333	7.75	9.02
Merged-chr10-114049870-5	chr10	114049655	114050103	FALSE	TRUE	TRUE	intron (NM_058222, intron 4 of 9)	Tigger7|DNA|TcMar-Tigger	6465	NM_058222	6975	Hs.345485	NM_058222	ENSG00000119913	TECTB	-	tectorin beta	protein-coding	4.035	15.9633	16.75	2.47	2.135	3.01
Merged-chr10-114061704-5	chr10	114061491	114061935	FALSE	TRUE	TRUE	intron (NM_058222, intron 8 of 9)	AluSz|SINE|Alu	-2267	NR_106772	102465427		NR_106772	ENSG00000283688	MIR6715B	hsa-mir-6715b	microRNA 6715b	ncRNA	4.14	25.0867	14.8	3.40333	3.1	6.01
Merged-chr10-114064499-5	chr10	114063947	114064881	FALSE	TRUE	TRUE	3' UTR (NM_058222, exon 10 of 10)	3' UTR (NM_058222, exon 10 of 10)	-4968	NR_106772	102465427		NR_106772	ENSG00000283688	MIR6715B	hsa-mir-6715b	microRNA 6715b	ncRNA	10.375	60.84	29.49	9.32333	8.53	3.51
Merged-chr10-114125013-3	chr10	114124774	114125252	FALSE	TRUE	FALSE	Intergenic	Intergenic	-8660	NR_028134	390003	Hs.534691	NR_028134	ENSG00000243316	GUCY2GP	GUCY2G	guanylate cyclase 2G, pseudogene	pseudo	5.46	21.5967	8.795	5.46	6.01	3.51
Merged-chr10-114220895-5	chr10	114220701	114221127	FALSE	TRUE	TRUE	intron (NM_145206, intron 2 of 7)	LTR40c|LTR|ERVL	-13610	NM_001351082	64429	Hs.196990	NM_022494	ENSG00000023041	ZDHHC6	DHHC-6|ZNF376	zinc finger DHHC-type containing 6	protein-coding	2.34	26.29	17.52	2.19333	1.94	3.01
Merged-chr10-114391428-4	chr10	114391203	114391734	FALSE	TRUE	FALSE	intron (NM_145206, intron 5 of 7)	MIR3|SINE|MIR	-2461	NR_036177	100422909		NR_036177	ENSG00000264763	MIR4295	-	microRNA 4295	ncRNA	7.17	24.6533	14.345	6.61333	4.075	8.52
Merged-chr10-114403557-6	chr10	114403099	114403956	TRUE	TRUE	TRUE	intron (NM_145206, intron 5 of 7)	intron (NM_145206, intron 5 of 7)	9598	NR_036177	100422909		NR_036177	ENSG00000264763	MIR4295	-	microRNA 4295	ncRNA	17.685	112.97	49.185	7.11667	6.395	6.52
Merged-chr10-114438734-4	chr10	114438463	114439001	FALSE	FALSE	TRUE	intron (NM_001318205, intron 7 of 7)	intron (NM_001318205, intron 7 of 7)	44803	NR_036177	100422909		NR_036177	ENSG00000264763	MIR4295	-	microRNA 4295	ncRNA	8.75	27.2833	24.865	6.18	5.62	4.51
Merged-chr10-114476953-3	chr10	114476728	114477157	FALSE	TRUE	FALSE	intron (NM_001318205, intron 7 of 7)	intron (NM_001318205, intron 7 of 7)	83013	NR_036177	100422909		NR_036177	ENSG00000264763	MIR4295	-	microRNA 4295	ncRNA	1.76	28.73	6.075	3.84667	2.715	4.51
Merged-chr10-114635563-3	chr10	114635363	114635926	FALSE	TRUE	FALSE	Intergenic	L1MD3|LINE|L1	52389	NR_120684	103344931	Hs.458447	NR_120684	ENSG00000260917	LOC103344931	-	uncharacterized LOC103344931	ncRNA	4.77	21.48	9.54	4.94	5.43	2.51
Merged-chr10-114723941-5	chr10	114723671	114724324	FALSE	TRUE	TRUE	intron (NM_001198530, intron 3 of 10)	intron (NM_001198530, intron 3 of 10)	13988	NM_001146286	6934	Hs.593995	NM_030756	ENSG00000148737	TCF7L2	TCF-4|TCF4	transcription factor 7 like 2	protein-coding	4.83	27.38	18.225	3.82333	3.295	4.01
Merged-chr10-114816283-5	chr10	114816079	114816502	FALSE	TRUE	TRUE	intron (NM_001198528, intron 4 of 14)	intron (NM_001198528, intron 4 of 14)	11176	NR_132769	106635520		NR_132769		SNORA87	-	small nucleolar RNA, H/ACA box 87	snoRNA	1.575	13.3633	9.475	2.19	2.135	2
Merged-chr10-114840562-4	chr10	114840370	114840720	FALSE	FALSE	TRUE	intron (NM_001198528, intron 4 of 14)	intron (NM_001198528, intron 4 of 14)	35431	NR_132769	106635520		NR_132769		SNORA87	-	small nucleolar RNA, H/ACA box 87	snoRNA	2.09	9.63	14.12	1.77667	1.94	1
Merged-chr10-114891567-4	chr10	114891407	114891744	FALSE	TRUE	FALSE	intron (NM_001349870, intron 1 of 11)	intron (NM_001349870, intron 1 of 11)	2183	NM_001349870	6934	Hs.593995	NM_030756	ENSG00000148737	TCF7L2	TCF-4|TCF4	transcription factor 7 like 2	protein-coding	1.545	16.61	8.315	2.31333	1.165	3.01
Merged-chr10-115063688-4	chr10	115063529	115063847	FALSE	TRUE	FALSE	Intergenic	L1MD2|LINE|L1	174296	NM_001349870	6934	Hs.593995	NM_030756	ENSG00000148737	TCF7L2	TCF-4|TCF4	transcription factor 7 like 2	protein-coding	1.615	11.7567	6.645	1.51667	0.585	1
Merged-chr10-115410192-3	chr10	115409987	115410474	FALSE	TRUE	FALSE	exon (NM_198060, exon 8 of 42)	exon (NM_198060, exon 8 of 42)	13599	NM_001322945	4892	Hs.268788	NM_006175	ENSG00000197893	NRAP	N-RAP	nebulin related anchoring protein	protein-coding	1.98	20.6033	8.16	2.04667	1.745	3.01
Merged-chr10-115713836-4	chr10	115713524	115714072	FALSE	FALSE	TRUE	Intergenic	MLT1A|LTR|ERVL-MaLR	-90008	NM_000684	153	Hs.99913	NM_000684	ENSG00000043591	ADRB1	ADRB1R|B1AR|BETA1AR|RHR	adrenoceptor beta 1	protein-coding	4.14	13.9767	17.32	2.17667	1.36	3.51
Merged-chr10-115842357-4	chr10	115841908	115842827	FALSE	FALSE	TRUE	Intergenic	Intergenic	38561	NM_000684	153	Hs.99913	NM_000684	ENSG00000043591	ADRB1	ADRB1R|B1AR|BETA1AR|RHR	adrenoceptor beta 1	protein-coding	3.595	35.2933	18.175	5.64667	3.1	4.51
Merged-chr10-116698045-4	chr10	116697824	116698462	FALSE	FALSE	TRUE	exon (NM_139169, exon 1 of 8)	exon (NM_139169, exon 1 of 8)	191	NM_139169	142940	Hs.21187	NM_139169	ENSG00000165832	TRUB1	PUS4	TruB pseudouridine synthase family member 1	protein-coding	6.925	39.22	23.235	6.73333	5.235	5.51
Merged-chr10-116729281-4	chr10	116729129	116729436	FALSE	FALSE	TRUE	intron (NM_139169, intron 4 of 7)	intron (NM_139169, intron 4 of 7)	-25134	NR_120677	102724589		NR_120677	ENSG00000236799	LOC102724589	-	uncharacterized LOC102724589	ncRNA	1.835	9.79333	13.62	1.51333	1.165	1.5
Merged-chr10-118626714-5	chr10	118626556	118626905	FALSE	TRUE	TRUE	intron (NM_001242699, intron 7 of 13)	intron (NM_001242699, intron 7 of 13)	-17442	NM_001330164	259217	Hs.648448	NM_025015	ENSG00000165868	HSPA12A	-	heat shock protein family A (Hsp70) member 12A	protein-coding	1.025	15.32	9.025	1.23333	1.745	1.5
Merged-chr10-118648493-3	chr10	118648366	118648636	FALSE	TRUE	FALSE	intron (NM_018330, intron 14 of 14)	intron (NM_018330, intron 14 of 14)	-39213	NM_001330164	259217	Hs.648448	NM_025015	ENSG00000165868	HSPA12A	-	heat shock protein family A (Hsp70) member 12A	protein-coding	1.395	9.91333	4.125	2.21333	0.97	2.51
Merged-chr10-118946493-5	chr10	118946151	118946936	FALSE	TRUE	TRUE	Intergenic	Intergenic	-10457	NM_181840	338567	Hs.449650	NM_181840	ENSG00000186795	KCNK18	K2p18.1|MGR13|TRESK|TRESK-2|TRESK2|TRIK	potassium two pore domain channel subfamily K member 18	protein-coding	3.225	56.4367	21.6	5.34333	2.325	5.51
Merged-chr10-119136145-5	chr10	119135938	119136362	FALSE	TRUE	TRUE	Intergenic	Intergenic	-1172	NM_173791	118987	Hs.501149	NM_173791	ENSG00000165650	PDZD8	PDZK8	PDZ domain containing 8	protein-coding	5.35	18.5733	11.47	3.14667	2.91	2
Merged-chr10-119164545-6	chr10	119164077	119164964	TRUE	TRUE	TRUE	Intergenic	MER103C|DNA|hAT-Charlie	-29542	NM_173791	118987	Hs.501149	NM_173791	ENSG00000165650	PDZD8	PDZK8	PDZ domain containing 8	protein-coding	12.96	48.19	17.43	7.13333	6.2	8.02
Merged-chr10-119214216-4	chr10	119214070	119214341	FALSE	FALSE	TRUE	Intergenic	Intergenic	-79227	NM_173791	118987	Hs.501149	NM_173791	ENSG00000165650	PDZD8	PDZK8	PDZ domain containing 8	protein-coding	2.015	9.09333	6.685	1.23667	0.97	2
Merged-chr10-119231166-3	chr10	119230894	119231345	FALSE	FALSE	TRUE	Intergenic	L1MB3|LINE|L1	-70837	NM_001165924	2018	Hs.202095	NM_004098	ENSG00000170370	EMX2	-	empty spiracles homeobox 2	protein-coding	2.67	6.61	14.3	1.63333	2.135	3.51
Merged-chr10-119423425-5	chr10	119423151	119423608	FALSE	TRUE	TRUE	Intergenic	Intergenic	-118800	NR_002791	196047	Hs.312592	NR_002791	ENSG00000229847	EMX2OS	EMX2-AS1|NCRNA00045	EMX2 opposite strand/antisense RNA	ncRNA	2.015	23.0433	10.355	3.69	0.78	1
Merged-chr10-119522481-5	chr10	119522235	119522737	FALSE	TRUE	TRUE	Intergenic	Intergenic	-217907	NR_002791	196047	Hs.312592	NR_002791	ENSG00000229847	EMX2OS	EMX2-AS1|NCRNA00045	EMX2 opposite strand/antisense RNA	ncRNA	2.455	19.3367	11.105	1.22333	1.36	3.51
Merged-chr10-119564134-5	chr10	119563817	119564556	FALSE	TRUE	TRUE	Intergenic	Intergenic	241928	NM_014904	22841	Hs.173656	NM_014904	ENSG00000107560	RAB11FIP2	Rab11-FIP2|nRip11	RAB11 family interacting protein 2	protein-coding	4.355	31.38	16.68	3.82667	2.715	2
Merged-chr10-119762306-5	chr10	119761997	119762554	FALSE	TRUE	TRUE	Intergenic	Intergenic	43839	NM_014904	22841	Hs.173656	NM_014904	ENSG00000107560	RAB11FIP2	Rab11-FIP2|nRip11	RAB11 family interacting protein 2	protein-coding	2.79	23.5067	13.145	2.33667	0.97	2.51
Merged-chr10-120328916-5	chr10	120328414	120329449	FALSE	FALSE	TRUE	Intergenic	Intergenic	26229	NM_004248	2834	Hs.248119	NM_004248	ENSG00000119973	PRLHR	GPR10|GR3|PrRPR	prolactin releasing hormone receptor	protein-coding	3.345	24.5533	22.42	5.6	3.875	4.51
Merged-chr10-120514644-3	chr10	120514504	120514778	TRUE	FALSE	FALSE	5' UTR (NM_153810, exon 1 of 9)	5' UTR (NM_153810, exon 1 of 9)	117	NM_153810	143384	Hs.420024	NM_153810	ENSG00000151893	CACUL1	C10orf46|CAC1	CDK2 associated cullin domain 1	protein-coding	9.43	21.19	5.87	3.69667	2.905	1.5
Merged-chr10-120760330-5	chr10	120760148	120760490	FALSE	TRUE	TRUE	Intergenic	Intergenic	-28909	NM_199461	340719	Hs.591918	NM_199461	ENSG00000188613	NANOS1	EC_Rep1a|NOS-1|NOS1|SPGF12|ZC2HC12A	nanos C2HC-type zinc finger 1	protein-coding	1.945	12.7333	8.84	1.23333	1.36	1
Merged-chr10-120873473-4	chr10	120873158	120873704	FALSE	TRUE	FALSE	intron (NM_001303113, intron 3 of 7)	intron (NM_001303113, intron 3 of 7)	9802	NR_027141	55855	Hs.567120	NM_018472		FAM45BP	FAM45B|HT011	family with sequence similarity 45, member A pseudogene	pseudo	7.435	51.9033	20.875	6.58333	7.755	5.01
Merged-chr10-120881974-3	chr10	120881679	120882158	FALSE	FALSE	TRUE	intron (NM_207009, intron 5 of 8)	MIRb|SINE|MIR	18289	NR_027141	55855	Hs.567120	NM_018472		FAM45BP	FAM45B|HT011	family with sequence similarity 45, member A pseudogene	pseudo	2.015	8.70667	16.05	2.04667	1.55	2.51
Merged-chr10-120932374-5	chr10	120932147	120932794	FALSE	TRUE	TRUE	intron (NM_001302272, intron 4 of 5)	AluSc8|SINE|Alu	5907	NR_126106	10935	Hs.523302	NM_006793	ENSG00000165672	PRDX3	AOP-1|AOP1|HBC189|MER5|PRO1748|SP-22|prx-III	peroxiredoxin 3	protein-coding	3.7	34.2667	27.2	4.10333	2.715	4.51
Merged-chr10-121082821-5	chr10	121082527	121083208	FALSE	TRUE	TRUE	intron (NM_005308, intron 1 of 15)	MER5A|DNA|hAT-Charlie	-54617	NR_039829	100616398		NR_039829	ENSG00000265719	MIR4681	-	microRNA 4681	ncRNA	6.525	34.69	24.75	6.86333	7.755	7.02
Merged-chr10-121167685-5	chr10	121167398	121168053	FALSE	TRUE	TRUE	intron (NM_005308, intron 4 of 15)	AluJb|SINE|Alu	30241	NR_039829	100616398		NR_039829	ENSG00000265719	MIR4681	-	microRNA 4681	ncRNA	2.755	25.9767	15.66	2.63	3.49	5.01
Merged-chr10-121393838-5	chr10	121393462	121394229	FALSE	TRUE	TRUE	Intergenic	AluJb|SINE|Alu	-17037	NM_004281	9531	Hs.523309	NM_004281	ENSG00000151929	BAG3	BAG-3|BIS|CAIR-1|MFM6	BCL2 associated athanogene 3	protein-coding	4.39	60.5533	29.85	4.65	6.205	5.01
Merged-chr10-122651054-4	chr10	122650923	122651206	FALSE	FALSE	TRUE	intron (NM_018117, intron 19 of 28)	intron (NM_018117, intron 19 of 28)	-40373	NR_033850	283089	Hs.568750	NR_033850	ENSG00000227165	WDR11-AS1	-	WDR11 antisense RNA 1	ncRNA	1.025	6.22667	7.75	0.97	0.585	0
Merged-chr10-122657051-5	chr10	122656826	122657349	FALSE	TRUE	TRUE	intron (NM_018117, intron 19 of 28)	L1MC4a|LINE|L1	-46396	NR_033850	283089	Hs.568750	NR_033850	ENSG00000227165	WDR11-AS1	-	WDR11 antisense RNA 1	ncRNA	1.465	25.8167	14.825	4.38	1.94	3.01
Merged-chr10-123085626-3	chr10	123085406	123085866	FALSE	TRUE	FALSE	Intergenic	Intergenic	205192	NM_001320654	2263	Hs.533683	NM_000141	ENSG00000066468	FGFR2	BBDS|BEK|BFR-1|CD332|CEK3|CFD1|ECT1|JWS|K-SAM|KGFR|TK14|TK25	fibroblast growth factor receptor 2	protein-coding	2.165	14.8233	5.825	1.76333	1.165	1.5
Merged-chr10-123405088-3	chr10	123404962	123405242	FALSE	FALSE	TRUE	Intergenic	Intergenic	-47130	NR_073009	2263	Hs.533683	NM_000141	ENSG00000066468	FGFR2	BBDS|BEK|BFR-1|CD332|CEK3|CFD1|ECT1|JWS|K-SAM|KGFR|TK14|TK25	fibroblast growth factor receptor 2	protein-coding	1.025	5.41333	7.5	1.50333	0.585	1.5
Merged-chr10-123514394-3	chr10	123514214	123514553	FALSE	FALSE	TRUE	intron (NM_001001976, intron 11 of 11)	L1MC4|LINE|L1	-156411	NR_073009	2263	Hs.533683	NM_000141	ENSG00000066468	FGFR2	BBDS|BEK|BFR-1|CD332|CEK3|CFD1|ECT1|JWS|K-SAM|KGFR|TK14|TK25	fibroblast growth factor receptor 2	protein-coding	2.42	4.81333	8.955	1.52333	2.135	1.5
Merged-chr10-123591506-5	chr10	123591329	123591676	FALSE	TRUE	TRUE	intron (NM_001001976, intron 10 of 11)	intron (NM_001001976, intron 10 of 11)	96076	NM_007041	11101	Hs.632080	NM_007041	ENSG00000107669	ATE1	-	arginyltransferase 1	protein-coding	2.71	16.6467	13.85	1.37	2.52	3.01
Merged-chr10-123779166-5	chr10	123778823	123779456	FALSE	TRUE	TRUE	intron (NM_001291877, intron 1 of 19)	intron (NM_001291877, intron 1 of 19)	30450	NM_206861	10579	Hs.501252	NM_006997	ENSG00000138162	TACC2	AZU-1|ECTACC	transforming acidic coiled-coil containing protein 2	protein-coding	5.79	28.3867	17.155	6.57667	4.265	2.51
Merged-chr10-123861559-5	chr10	123861384	123861773	FALSE	TRUE	TRUE	intron (NM_001291877, intron 5 of 19)	Tigger3c|DNA|TcMar-Tigger	-10976	NM_001291879	10579	Hs.501252	NM_006997	ENSG00000138162	TACC2	AZU-1|ECTACC	transforming acidic coiled-coil containing protein 2	protein-coding	2.055	28.0333	14.12	2.32667	1.94	3.01
Merged-chr10-123925039-5	chr10	123924859	123925316	FALSE	TRUE	TRUE	intron (NM_001291878, intron 1 of 16)	intron (NM_001291878, intron 1 of 16)	2146	NM_006997	10579	Hs.501252	NM_006997	ENSG00000138162	TACC2	AZU-1|ECTACC	transforming acidic coiled-coil containing protein 2	protein-coding	3.295	30.5033	21.645	5.92	2.715	5.01
Merged-chr10-124050026-4	chr10	124049887	124050184	FALSE	TRUE	FALSE	intron (NM_001318189, intron 6 of 15)	intron (NM_001318189, intron 6 of 15)	19224	NM_144587	118663	Hs.422466	NM_144587	ENSG00000138152	BTBD16	C10orf87	BTB domain containing 16	protein-coding	1.14	14.2333	6.325	1.37667	1.55	2
Merged-chr10-124070102-4	chr10	124069891	124070421	FALSE	TRUE	FALSE	intron (NM_001318189, intron 10 of 15)	intron (NM_001318189, intron 10 of 15)	39345	NM_144587	118663	Hs.422466	NM_144587	ENSG00000138152	BTBD16	C10orf87	BTB domain containing 16	protein-coding	9.59	29.6	14.415	6.75	7.755	4.01
Merged-chr10-124173871-4	chr10	124173684	124174041	FALSE	FALSE	TRUE	intron (NM_001001974, intron 6 of 11)	intron (NM_001001974, intron 6 of 11)	-2619	NR_037506	100500866		NR_037506	ENSG00000265442	MIR3941	-	microRNA 3941	ncRNA	2.34	7.09667	10.79	2.04667	2.52	1
Merged-chr10-124324719-3	chr10	124324614	124324847	FALSE	FALSE	TRUE	intron (NM_001320644, intron 1 of 52)	Looper|DNA|PiggyBac	4549	NM_004406	1755	Hs.279611	NM_004406	ENSG00000187908	DMBT1	GP340|SAG|SALSA|muclin	deleted in malignant brain tumors 1	protein-coding	2.67	6.34333	8.455	1.63667	0.775	0.5
Merged-chr10-124822386-4	chr10	124822162	124822633	FALSE	FALSE	TRUE	Intergenic	MER44D|DNA|TcMar-Tigger	53968	NM_001330174	36	Hs.81934	NM_001609	ENSG00000196177	ACADSB	2-MEBCAD|ACAD7|SBCAD	acyl-CoA dehydrogenase short/branched chain	protein-coding	2.89	15.47	12.195	2.31	0.97	6.01
Merged-chr10-124869211-5	chr10	124868930	124869459	FALSE	TRUE	TRUE	Intergenic	Intergenic	-26373	NM_001105574	340784	Hs.531194	NM_001105574	ENSG00000188620	HMX3	NKX-5.1|NKX5.1|Nkx5-1	H6 family homeobox 3	protein-coding	3.295	32.6467	17.43	2.45667	0.58	2
Merged-chr10-125568490-5	chr10	125568179	125568727	FALSE	TRUE	TRUE	intron (NM_198148, intron 4 of 13)	Tigger7|DNA|TcMar-Tigger	83047	NM_198148	119587	Hs.656887	NM_198148	ENSG00000121898	CPXM2	CPX2|UNQ676	carboxypeptidase X, M14 family member 2	protein-coding	2.165	37.6233	15.89	1.65	1.165	3.01
Merged-chr10-125764323-4	chr10	125764105	125764522	FALSE	TRUE	FALSE	Intergenic	Intergenic	87627	NM_015892	51363	Hs.287537	NM_014863	ENSG00000182022	CHST15	BRAG|GALNAC4S-6ST	carbohydrate sulfotransferase 15	protein-coding	2.71	19.2667	8.14	2.74667	1.16	1.5
Merged-chr10-126043932-4	chr10	126043754	126044262	FALSE	FALSE	TRUE	Intergenic	L1ME4a|LINE|L1	63537	NM_001322968	4942	Hs.523332	NM_000274	ENSG00000065154	OAT	GACR|HOGA|OATASE|OKT	ornithine aminotransferase	protein-coding	4.795	19.6933	13.87	4.1	4.265	3.51
Merged-chr10-126159480-5	chr10	126159037	126159883	FALSE	TRUE	TRUE	intron (NM_001167880, intron 1 of 5)	intron (NM_001167880, intron 1 of 5)	9119	NM_001318332	64077	Hs.527748	NM_022126	ENSG00000107902	LHPP	HDHD2B	phospholysine phosphohistidine inorganic pyrophosphate phosphatase	protein-coding	14.765	84.89	49.455	8.32667	9.31	7.52
Merged-chr10-126278260-4	chr10	126278068	126278429	FALSE	TRUE	FALSE	intron (NM_022126, intron 6 of 6)	intron (NM_022126, intron 6 of 6)	-114349	NR_120631	101927944	Hs.437448	NR_120630		FAM53B-AS1	-	FAM53B antisense RNA 1	ncRNA	3.48	13.3267	7.23	2.2	2.13	3.51
Merged-chr10-126725823-5	chr10	126725433	126726148	FALSE	TRUE	TRUE	intron (NM_001083914, intron 3 of 10)	intron (NM_001083914, intron 3 of 10)	-4351	NR_036178	100423041		NR_036178	ENSG00000264572	MIR4296	-	microRNA 4296	ncRNA	3.075	33.4767	24.73	3.69333	3.685	2
Merged-chr10-126734514-4	chr10	126734373	126734655	FALSE	FALSE	TRUE	intron (NM_001321013, intron 1 of 9)	intron (NM_001321013, intron 1 of 9)	-13075	NR_036178	100423041		NR_036178	ENSG00000264572	MIR4296	-	microRNA 4296	ncRNA	0.875	8.88333	7.665	0.546667	0.195	0
Merged-chr10-127093625-5	chr10	127093346	127093898	FALSE	TRUE	TRUE	Intergenic	L1MA3|LINE|L1	-169318	NR_023362	100169752	Hs.652647	NR_023362	ENSG00000237675	TEX36-AS1	-	TEX36 antisense RNA 1	ncRNA	5.2	37.6333	35.27	1.37	0.97	2.51
Merged-chr10-129019883-3	chr10	129019650	129020096	FALSE	TRUE	FALSE	intron (NM_001380, intron 27 of 51)	intron (NM_001380, intron 27 of 51)	-25451	NM_001039762	642938	Hs.613882	NM_001039762	ENSG00000188916	FAM196A	C10orf141|INSYN2	family with sequence similarity 196 member A	protein-coding	2.535	14.51	5.08	1.52333	1.55	1
Merged-chr10-130375449-5	chr10	130375208	130375759	FALSE	TRUE	TRUE	Intergenic	Intergenic	291269	NR_120619	101927381	Hs.523342	NR_120619	ENSG00000280953	LINC01163	TCONS_00017722	long intergenic non-protein coding RNA 1163	ncRNA	2.78	12.7367	17.36	0.55	1.36	1.5
Merged-chr10-132817338-3	chr10	132817149	132817577	FALSE	TRUE	FALSE	Intergenic	Intergenic	-56432	NR_036180	100422867		NR_036180	ENSG00000264803	MIR378C	mir-378c	microRNA 378c	ncRNA	1.245	17.6033	6.845	2.19	1.55	1
Merged-chr10-134136389-5	chr10	134136041	134136687	FALSE	TRUE	TRUE	TTS (NM_001318881)	TTS (NM_001318881)	9015	NM_001318880	282974	Hs.469002	NM_173575	ENSG00000165752	STK32C	PKE|YANK3	serine/threonine kinase 32C	protein-coding	7.295	36.89	17.61	5.19667	3.875	9.02
Merged-chr10-134490003-5	chr10	134489846	134490235	FALSE	TRUE	TRUE	intron (NM_005539, intron 4 of 15)	intron (NM_005539, intron 4 of 15)	-4739	NM_001321042	3632	Hs.523360	NM_005539	ENSG00000068383	INPP5A	5PTASE	inositol polyphosphate-5-phosphatase A	protein-coding	2.305	19.6567	15.005	2.75333	3.295	1
Merged-chr10-134975839-3	chr10	134975604	134976048	FALSE	TRUE	FALSE	intron (NM_001347864, intron 1 of 2)	intron (NM_001347864, intron 1 of 2)	1868	NM_001347866	85442	Hs.530685	NM_152643	ENSG00000171798	KNDC1	C10orf23|RASGEF2|Very-KIND|bB439H18.3|v-KIND	kinase non-catalytic C-lobe domain containing 1	protein-coding	1.43	10.7733	6.415	1.5	1.935	2
Merged-chr11-269524-5	chr11	269216	269770	FALSE	TRUE	TRUE	Intergenic	L1MB4|LINE|L1	-9077	NM_001276700	171389	Hs.352611	NM_138329	ENSG00000174885	NLRP6	AVR|CLR11.4|NALP6|NAVR|NAVR/AVR|PAN3|PYPAF5	NLR family pyrin domain containing 6	protein-coding	7.07	40	32.075	5.92	5.625	2
Merged-chr11-536596-4	chr11	536390	536771	FALSE	TRUE	FALSE	promoter-TSS (NM_198075)	promoter-TSS (NM_198075)	-942	NM_198075	115399	Hs.567655	NM_198075	ENSG00000161328	LRRC56	-	leucine rich repeat containing 56	protein-coding	4.575	19.4233	9.95	1.93	2.52	3.01
Merged-chr11-588110-5	chr11	587907	588289	FALSE	TRUE	TRUE	intron (NM_001286581, intron 4 of 17)	intron (NM_001286581, intron 4 of 17)	11652	NM_001286583	57661	Hs.325838	NM_020901	ENSG00000070047	PHRF1	PPP1R125|RNF221	PHD and ring finger domains 1	protein-coding	7.54	34.74	24.005	5.17667	5.04	3.01
Merged-chr11-643028-4	chr11	642872	643194	FALSE	TRUE	FALSE	Intergenic	Intergenic	5728	NM_000797	1815	Hs.99922	NM_000797	ENSG00000069696	DRD4	D4DR	dopamine receptor D4	protein-coding	2.12	12.1467	6.39	1.11	1.745	0.5
Merged-chr11-936498-4	chr11	936320	936677	FALSE	TRUE	FALSE	intron (NM_012305, intron 1 of 21)	AluJo|SINE|Alu	10689	NM_012305	161	Hs.19121	NM_012305	ENSG00000183020	AP2A2	ADTAB|CLAPA2|HIP-9|HIP9|HYPJ	adaptor related protein complex 2 subunit alpha 2	protein-coding	2.055	17.1567	8.885	2.99667	3.295	4.01
Merged-chr11-943102-5	chr11	942745	943378	FALSE	TRUE	TRUE	intron (NM_012305, intron 1 of 21)	L2b|LINE|L2	17252	NM_012305	161	Hs.19121	NM_012305	ENSG00000183020	AP2A2	ADTAB|CLAPA2|HIP-9|HIP9|HYPJ	adaptor related protein complex 2 subunit alpha 2	protein-coding	4.76	34.5033	20.49	2.71667	3.295	2
Merged-chr11-953742-4	chr11	953441	953919	FALSE	TRUE	FALSE	intron (NM_012305, intron 1 of 21)	intron (NM_012305, intron 1 of 21)	27871	NM_012305	161	Hs.19121	NM_012305	ENSG00000183020	AP2A2	ADTAB|CLAPA2|HIP-9|HIP9|HYPJ	adaptor related protein complex 2 subunit alpha 2	protein-coding	3.515	12.1867	8.885	2.19667	4.07	1.5
Merged-chr11-1133479-4	chr11	1133352	1133661	FALSE	TRUE	FALSE	Intergenic	Intergenic	-18074	NM_001304359	4586	Hs.534332	NM_017511	ENSG00000215182	MUC5AC	MUC5|TBM|leB|mucin	mucin 5AC, oligomeric mucus/gel-forming	protein-coding	0.625	10.2033	7.12	1.51	1.16	2
Merged-chr11-2003636-5	chr11	2003378	2003967	TRUE	TRUE	FALSE	TTS (NR_024471)	TTS (NR_024471)	7478	NR_024471	100133545	Hs.677620	NR_024471	ENSG00000226416	MRPL23-AS1	-	MRPL23 antisense RNA 1	ncRNA	13.615	41.72	16.705	5.18333	6.01	4.01
Merged-chr11-2093998-4	chr11	2093762	2094203	FALSE	FALSE	TRUE	Intergenic	Intergenic	61457	NR_030158	619552		NR_030158	ENSG00000207805	MIR483	MIRN483|hsa-mir-483|mir-483	microRNA 483	ncRNA	2.89	12.6167	9.18	1.89333	1.745	4.51
Merged-chr11-2689330-5	chr11	2689157	2689522	FALSE	TRUE	TRUE	non-coding (NR_002728, exon 1 of 1)	non-coding (NR_002728, exon 1 of 1)	31889	NR_002728	10984	Hs.604823	NR_002728	ENSG00000269821	KCNQ1OT1	KCNQ1-AS2|KCNQ10T1|Kncq1|KvDMR1|KvLQT1-AS|LIT1|NCRNA00012	KCNQ1 opposite strand/antisense transcript 1 (non-protein coding)	ncRNA	4.105	18.5733	14.665	2.88667	2.135	2
Merged-chr11-2809690-6	chr11	2809364	2809965	TRUE	TRUE	TRUE	intron (NM_000218, intron 15 of 15)	intron (NM_000218, intron 15 of 15)	73135	NR_130721	338653	Hs.639425	NR_130721	ENSG00000229414	KCNQ1-AS1	-	KCNQ1 antisense RNA 1	ncRNA	7.07	36.25	24.09	3.85	2.52	3.01
Merged-chr11-3078536-6	chr11	3078098	3078847	TRUE	TRUE	TRUE	intron (NM_001014437, intron 1 of 22)	CpG	209	NM_001014437	833	Hs.274873	NM_001751	ENSG00000110619	CARS	CARS1|CYSRS|MGC:11246	cysteinyl-tRNA synthetase	protein-coding	22.765	58.0367	49.98	5.49333	7.56	7.52
Merged-chr11-3926848-5	chr11	3926611	3927112	FALSE	TRUE	TRUE	intron (NM_003156, intron 1 of 11)	MIRb|SINE|MIR	49569	NR_039835	100616453		NR_039835	ENSG00000284525	MIR4687	-	microRNA 4687	ncRNA	10.135	41.95	23.005	4.62667	6.205	4.51
Merged-chr11-3935315-5	chr11	3935129	3935529	FALSE	TRUE	TRUE	intron (NM_003156, intron 1 of 11)	L1MB4|LINE|L1	58037	NR_039835	100616453		NR_039835	ENSG00000284525	MIR4687	-	microRNA 4687	ncRNA	3.84	20.3867	9.79	3.12333	3.295	4.01
Merged-chr11-4065401-5	chr11	4065056	4065631	FALSE	TRUE	TRUE	intron (NM_003156, intron 3 of 11)	intron (NM_003156, intron 3 of 11)	-50572	NM_001318064	6240	Hs.445705	NM_001033	ENSG00000167325	RRM1	R1|RIR1|RR1	ribonucleotide reductase catalytic subunit M1	protein-coding	4.29	35.2267	14.89	6.30667	3.295	6.01
Merged-chr11-6511211-4	chr11	6510980	6511582	FALSE	FALSE	TRUE	Intergenic	AluSx1|SINE|Alu	-7245	NM_173589	144132	Hs.720080	NM_144666	ENSG00000179532	DNHD1	C11orf47|CCDC35|DHCD1|DNHD1L	dynein heavy chain domain 1	protein-coding	3.225	15.3967	14.96	2.32667	4.655	3.51
Merged-chr11-7621585-6	chr11	7621299	7621821	TRUE	TRUE	TRUE	intron (NR_147792, intron 5 of 24)	intron (NR_147792, intron 5 of 24)	3143	NM_001256568	8495	Hs.655714	NM_003621	ENSG00000166387	PPFIBP2	Cclp1	PPFIA binding protein 2	protein-coding	11.815	51.0967	36.515	4.79	2.71	3.01
Merged-chr11-7999014-4	chr11	7998837	7999191	FALSE	FALSE	TRUE	Intergenic	Intergenic	-9853	NM_003754	8665	Hs.516023	NM_003754	ENSG00000175390	EIF3F	EIF3S5|eIF3-p47	eukaryotic translation initiation factor 3 subunit F	protein-coding	0.555	13.6833	12.51	1.63	1.55	2.51
Merged-chr11-8409095-3	chr11	8408760	8409309	FALSE	TRUE	FALSE	Intergenic	MIR|SINE|MIR	-118852	NM_001270428	4004	Hs.654426	NM_002315	ENSG00000166407	LMO1	RBTN1|RHOM1|TTG1	LIM domain only 1	protein-coding	3.37	14.9033	6.46	2.78	2.91	2
Merged-chr11-8411155-6	chr11	8410890	8411496	FALSE	TRUE	TRUE	Intergenic	Intergenic	-121011	NM_001270428	4004	Hs.654426	NM_002315	ENSG00000166407	LMO1	RBTN1|RHOM1|TTG1	LIM domain only 1	protein-coding	8.495	24.2933	12.67	3.58	6.59	6.01
Merged-chr11-8814446-2	chr11	8814312	8814669	FALSE	FALSE	TRUE	intron (NR_120590, intron 4 of 4)	L1M4|LINE|L1	17734	NM_213618	6764	Hs.117715	NM_005418	ENSG00000166444	ST5	DENND2B|HTS1|p126	suppression of tumorigenicity 5	protein-coding	2.605	8.67	8.615	1.64667	1.355	4.01
Merged-chr11-9336090-5	chr11	9335766	9336287	FALSE	TRUE	TRUE	non-coding (NR_028491, exon 1 of 8)	non-coding (NR_028491, exon 1 of 8)	289	NM_015012	440026	Hs.594563	NM_015012	ENSG00000166471	TMEM41B	-	transmembrane protein 41B	protein-coding	5.46	34.7133	16.775	3.82333	6.01	5.51
Merged-chr11-9532354-5	chr11	9532130	9532641	FALSE	TRUE	TRUE	intron (NM_003442, intron 12 of 15)	intron (NM_003442, intron 12 of 15)	49873	NM_001282656	7702	Hs.523471	NM_003442	ENSG00000166478	ZNF143	SBF|STAF|pHZ-1	zinc finger protein 143	protein-coding	3.92	33.0933	18.34	5.76333	5.04	3.01
Merged-chr11-9632944-6	chr11	9632529	9633367	TRUE	TRUE	TRUE	Intergenic	L2a|LINE|L2	36714	NM_001143976	7465	Hs.249441	NM_003390	ENSG00000166483	WEE1	WEE1A|WEE1hu	WEE1 G2 checkpoint kinase	protein-coding	10.905	88.1833	66.75	4.91667	3.685	6.01
Merged-chr11-9824301-5	chr11	9823874	9824681	FALSE	TRUE	TRUE	intron (NM_030962, intron 32 of 39)	intron (NM_030962, intron 32 of 39)	-36412	NR_120539	101928008	Hs.585524	NR_120539	ENSG00000255476	LOC101928008	-	uncharacterized LOC101928008	ncRNA	5.28	55.7667	45.645	7.10333	4.655	5.51
Merged-chr11-9949416-3	chr11	9949302	9949549	FALSE	FALSE	TRUE	intron (NR_120539, intron 2 of 2)	L1ME1|LINE|L1	88736	NR_120539	101928008	Hs.585524	NR_120539	ENSG00000255476	LOC101928008	-	uncharacterized LOC101928008	ncRNA	1.835	9.24	11.83	2.47667	1.94	1
Merged-chr11-10072408-5	chr11	10072069	10072824	FALSE	TRUE	TRUE	intron (NM_030962, intron 2 of 39)	MER44D|DNA|TcMar-Tigger	211757	NR_120539	101928008	Hs.585524	NR_120539	ENSG00000255476	LOC101928008	-	uncharacterized LOC101928008	ncRNA	5.68	66.65	33.23	7.92	6.205	5.01
Merged-chr11-10098683-4	chr11	10098497	10098918	FALSE	FALSE	TRUE	intron (NM_030962, intron 2 of 39)	L1PA7|LINE|L1	217047	NM_030962	81846	Hs.577252	NM_030962	ENSG00000133812	SBF2	CMT4B2|DENND7B|MTMR13	SET binding factor 2	protein-coding	2.055	15.24	13.24	3.27333	3.295	4.01
Merged-chr11-10166677-2	chr11	10166537	10166830	FALSE	FALSE	TRUE	intron (NM_030962, intron 2 of 39)	MLT1G|LTR|ERVL-MaLR	149071	NM_030962	81846	Hs.577252	NM_030962	ENSG00000133812	SBF2	CMT4B2|DENND7B|MTMR13	SET binding factor 2	protein-coding	0.74	5.10667	7.73	0.823333	0.585	0
Merged-chr11-10373318-4	chr11	10372976	10373559	FALSE	TRUE	FALSE	intron (NR_103765, intron 2 of 3)	intron (NR_103765, intron 2 of 3)	43407	NR_103765	100130460	Hs.501890	NR_103765		CAND1.11	-	uncharacterized LOC100130460	ncRNA	5.21	28.7767	12.875	7.16667	3.1	5.01
Merged-chr11-10428668-5	chr11	10428498	10428832	FALSE	TRUE	TRUE	intron (NR_103765, intron 2 of 3)	intron (NR_103765, intron 2 of 3)	-43203	NM_001172431	272	Hs.501890	NM_000480	ENSG00000133805	AMPD3	-	adenosine monophosphate deaminase 3	protein-coding	1.76	16.7867	11.54	2.61	2.52	2
Merged-chr11-10619535-3	chr11	10619415	10619649	FALSE	FALSE	TRUE	intron (NR_034094, intron 2 of 2)	intron (NR_034094, intron 2 of 2)	-29167	NM_006691	10894	Hs.655332	NM_006691	ENSG00000133800	LYVE1	CRSBP-1|HAR|LYVE-1|XLKD1	lymphatic vessel endothelial hyaluronan receptor 1	protein-coding	2.015	4.22333	6.685	0.83	0.97	0.5
Merged-chr11-10799227-4	chr11	10799042	10799365	FALSE	TRUE	FALSE	intron (NM_014633, intron 24 of 24)	intron (NM_014633, intron 24 of 24)	23952	NR_004403	692223	Hs.723086	NR_004403	ENSG00000238622	SNORD97	U97	small nucleolar RNA, C/D box 97	snoRNA	1.65	17.8567	6.505	2.87	2.715	3.51
Merged-chr11-10827518-5	chr11	10827303	10827785	FALSE	TRUE	TRUE	exon (NM_001418, exon 4 of 22)	exon (NM_001418, exon 4 of 22)	1999	NM_001172705	1982	Hs.183684	NM_001418	ENSG00000110321	EIF4G2	AAG1|DAP5|NAT1|P97	eukaryotic translation initiation factor 4 gamma 2	protein-coding	5.635	35.04	32.39	4.13333	2.91	3.51
Merged-chr11-11835053-5	chr11	11834824	11835355	FALSE	TRUE	TRUE	Intergenic	Eulor5A|DNA?|DNA?	-27881	NM_001282659	55031	Hs.577256	NM_017944	ENSG00000170242	USP47	TRFP	ubiquitin specific peptidase 47	protein-coding	9.085	46.9033	27.405	6.58333	4.265	5.51
Merged-chr11-12063953-4	chr11	12063742	12064119	FALSE	TRUE	FALSE	intron (NR_135109, intron 1 of 1)	intron (NR_135109, intron 1 of 1)	11508	NR_135109	105376554	Hs.523483	NR_135109	ENSG00000254486	LINC02547	-	long intergenic non-protein coding RNA 2547	ncRNA	1.325	19.6633	9.09	2.73	1.55	3.51
Merged-chr11-12085106-4	chr11	12084941	12085298	FALSE	TRUE	FALSE	Intergenic	Intergenic	32697	NR_135109	105376554	Hs.523483	NR_135109	ENSG00000254486	LINC02547	-	long intergenic non-protein coding RNA 2547	ncRNA	1.245	17.8667	7.82	2.59333	1.165	1.5
Merged-chr11-12088040-4	chr11	12087838	12088479	FALSE	TRUE	FALSE	Intergenic	MER5B|DNA|hAT-Charlie	35736	NR_135109	105376554	Hs.523483	NR_135109	ENSG00000254486	LINC02547	-	long intergenic non-protein coding RNA 2547	ncRNA	6.595	33.05	16.135	7.66667	3.49	8.02
Merged-chr11-12146555-5	chr11	12146335	12146751	FALSE	TRUE	TRUE	intron (NM_001346293, intron 2 of 26)	L3|LINE|CR1	-13394	NM_001282665	9645	Hs.501928	NM_014632	ENSG00000133816	MICAL2	MICAL-2|MICAL2PV1|MICAL2PV2	microtubule associated monooxygenase, calponin and LIM domain containing 2	protein-coding	0.995	15.4833	7.935	1.49667	1.165	3.01
Merged-chr11-12188814-4	chr11	12188526	12189116	FALSE	TRUE	FALSE	intron (NM_001346295, intron 3 of 26)	intron (NM_001346295, intron 3 of 26)	3591	NR_106739	102466906		NR_106739	ENSG00000275373	MIR6124	hsa-mir-6124	microRNA 6124	ncRNA	6.19	42.11	17.68	8.66667	4.845	6.01
Merged-chr11-12254463-4	chr11	12254184	12254847	FALSE	FALSE	TRUE	intron (NM_001346295, intron 15 of 26)	Tigger7|DNA|TcMar-Tigger	-53932	NM_032867	84953	Hs.60371	NM_032867	ENSG00000133816	MICALCL	Ebitein1	MICAL C-terminal like	protein-coding	2.385	23.5467	14.915	3.57	2.325	5.51
Merged-chr11-12256906-3	chr11	12256757	12257115	FALSE	FALSE	TRUE	intron (NM_001346295, intron 15 of 26)	intron (NM_001346295, intron 15 of 26)	-51511	NM_032867	84953	Hs.60371	NM_032867	ENSG00000133816	MICALCL	Ebitein1	MICAL C-terminal like	protein-coding	4.66	7.98667	11.175	2.74667	1.935	2.51
Merged-chr11-12433685-3	chr11	12433482	12433881	FALSE	FALSE	TRUE	intron (NM_018222, intron 1 of 12)	L2c|LINE|L2	34563	NM_018222	55742	Hs.432914	NM_018222	ENSG00000197702	PARVA	CH-ILKBP|MXRA2	parvin alpha	protein-coding	2.57	8.81333	8.18	2.47333	0.97	3.01
Merged-chr11-12460003-4	chr11	12459814	12460259	FALSE	FALSE	TRUE	intron (NM_018222, intron 1 of 12)	MSTD|LTR|ERVL-MaLR	60918	NM_018222	55742	Hs.432914	NM_018222	ENSG00000197702	PARVA	CH-ILKBP|MXRA2	parvin alpha	protein-coding	1.615	13.25	11.2	1.91667	2.325	0.5
Merged-chr11-12621087-4	chr11	12620933	12621235	FALSE	TRUE	FALSE	Intergenic	Intergenic	-74885	NM_021961	7003	Hs.655331	NM_021961	ENSG00000187079	TEAD1	AA|NTEF-1|REF1|TCF-13|TCF13|TEAD-1|TEF-1	TEA domain transcription factor 1	protein-coding	2.055	13.1833	6.685	2.19667	3.875	2.51
Merged-chr11-12691720-5	chr11	12691532	12691921	FALSE	TRUE	TRUE	Intergenic	L1ME3B|LINE|L1	-4243	NM_021961	7003	Hs.655331	NM_021961	ENSG00000187079	TEAD1	AA|NTEF-1|REF1|TCF-13|TCF13|TEAD-1|TEF-1	TEA domain transcription factor 1	protein-coding	0.81	26.36	19.175	3.29333	2.325	1.5
Merged-chr11-12893474-4	chr11	12893279	12893632	FALSE	FALSE	TRUE	intron (NM_021961, intron 5 of 12)	intron (NM_021961, intron 5 of 12)	117640	NR_038904	100506305	Hs.153408	NR_038904	ENSG00000251381	LINC00958	-	long intergenic non-protein coding RNA 958	ncRNA	3.225	10.3933	11.49	2.17667	0.97	1.5
Merged-chr11-12972419-5	chr11	12972156	12972670	FALSE	TRUE	TRUE	Intergenic	LTR16D2|LTR|ERVL	38682	NR_038904	100506305	Hs.153408	NR_038904	ENSG00000251381	LINC00958	-	long intergenic non-protein coding RNA 958	ncRNA	3.515	31.2133	21.03	4.08	1.745	3.01
Merged-chr11-13011216-4	chr11	13011037	13011373	FALSE	TRUE	FALSE	promoter-TSS (NR_038904)	promoter-TSS (NR_038904)	-110	NR_038904	100506305	Hs.153408	NR_038904	ENSG00000251381	LINC00958	-	long intergenic non-protein coding RNA 958	ncRNA	3.515	16.34	9.745	3.15	2.13	2.51
Merged-chr11-13083058-4	chr11	13082681	13083450	FALSE	FALSE	TRUE	Intergenic	Intergenic	52095	NM_001080521	644943	Hs.134650	NM_001080521	ENSG00000189431	RASSF10	-	Ras association domain family member 10	protein-coding	3.955	26.44	16.68	3.41333	2.71	3.51
Merged-chr11-13204970-5	chr11	13204712	13205205	FALSE	TRUE	TRUE	Intergenic	Intergenic	-93241	NM_001351804	406	Hs.65734	NM_001178	ENSG00000133794	ARNTL	BMAL1|BMAL1c|JAP3|MOP3|PASD3|TIC|bHLHe5	aryl hydrocarbon receptor nuclear translocator like	protein-coding	4.945	27.9767	20.06	4.23	3.295	4.51
Merged-chr11-13359926-4	chr11	13359557	13360285	FALSE	FALSE	TRUE	intron (NM_001351821, intron 3 of 19)	intron (NM_001351821, intron 3 of 19)	60647	NM_001351821	406	Hs.65734	NM_001178	ENSG00000133794	ARNTL	BMAL1|BMAL1c|JAP3|MOP3|PASD3|TIC|bHLHe5	aryl hydrocarbon receptor nuclear translocator like	protein-coding	4.66	22.69	19.38	6.69	5.235	6.52
Merged-chr11-13470605-2	chr11	13470486	13470761	FALSE	FALSE	TRUE	intron (NM_032320, intron 1 of 8)	intron (NM_032320, intron 1 of 8)	-8797	NM_001297742	84280	Hs.332382	NM_032320	ENSG00000148925	BTBD10	GMRP-1|GMRP1	BTB domain containing 10	protein-coding	0.44	5.30667	9.475	1.38333	0.195	2
Merged-chr11-13660143-3	chr11	13660015	13660295	FALSE	TRUE	FALSE	Intergenic	AluJb|SINE|Alu	-30051	NM_032228	84188	Hs.501991	NM_032228	ENSG00000197601	FAR1	MLSTD2|PFCRD|SDR10E1	fatty acyl-CoA reductase 1	protein-coding	1.87	14.5033	4.69	1.38	2.13	2.51
Merged-chr11-14279958-5	chr11	14279745	14280231	FALSE	TRUE	TRUE	intron (NM_006108, intron 12 of 16)	intron (NM_006108, intron 12 of 16)	100043	NM_001177315	22800	Hs.502004	NM_012250	ENSG00000133818	RRAS2	TC21	RAS related 2	protein-coding	4.315	89.1067	27.88	3.28	2.135	6.01
Merged-chr11-14358781-5	chr11	14358349	14359128	FALSE	TRUE	TRUE	intron (NM_001177314, intron 1 of 5)	MER44D|DNA|TcMar-Tigger	21293	NM_001177315	22800	Hs.502004	NM_012250	ENSG00000133818	RRAS2	TC21	RAS related 2	protein-coding	6.2	52.66	33.25	8.75333	4.845	10.02
Merged-chr11-14359925-3	chr11	14359641	14360336	FALSE	TRUE	FALSE	intron (NM_001177314, intron 1 of 5)	Tigger4b|DNA|TcMar-Tigger	20043	NM_001177315	22800	Hs.502004	NM_012250	ENSG00000133818	RRAS2	TC21	RAS related 2	protein-coding	2.755	19.6333	15.62	4.82	4.46	4.01
Merged-chr11-14502500-5	chr11	14502195	14502818	FALSE	TRUE	TRUE	intron (NM_001144061, intron 9 of 21)	intron (NM_001144061, intron 9 of 21)	18898	NM_016451	1315	Hs.339278	NM_016451	ENSG00000129083	COPB1	COPB	coatomer protein complex subunit beta 1	protein-coding	3.01	22.77	19.22	2.48	2.325	3.51
Merged-chr11-14697836-4	chr11	14697530	14698180	FALSE	TRUE	FALSE	intron (NM_000922, intron 1 of 15)	Tigger3c|DNA|TcMar-Tigger	32586	NM_000922	5140	Hs.445711	NM_000922	ENSG00000152270	PDE3B	HcGIP1|cGIPDE1	phosphodiesterase 3B	protein-coding	5.985	31.17	11.855	6.01	4.655	5.51
Merged-chr11-14700088-3	chr11	14699870	14700271	FALSE	FALSE	TRUE	intron (NM_000922, intron 1 of 15)	L1ME1|LINE|L1	34801	NM_000922	5140	Hs.445711	NM_000922	ENSG00000152270	PDE3B	HcGIP1|cGIPDE1	phosphodiesterase 3B	protein-coding	1.98	7.14667	13.465	2.31667	1.165	1.5
Merged-chr11-14874347-5	chr11	14874083	14874681	FALSE	TRUE	TRUE	intron (NM_000922, intron 12 of 15)	FLAM_C|SINE|Alu	39369	NM_024514	120227	Hs.371427	NM_024514	ENSG00000186104	CYP2R1	-	cytochrome P450 family 2 subfamily R member 1	protein-coding	3.665	24.9967	25.365	2.18	3.49	1.5
Merged-chr11-14906408-4	chr11	14906175	14906635	FALSE	FALSE	TRUE	intron (NM_024514, intron 2 of 4)	intron (NM_024514, intron 2 of 4)	7346	NM_024514	120227	Hs.371427	NM_024514	ENSG00000186104	CYP2R1	-	cytochrome P450 family 2 subfamily R member 1	protein-coding	3.195	19.4933	26.52	3.14667	2.52	2.51
Merged-chr11-14916770-5	chr11	14916390	14917096	FALSE	TRUE	TRUE	Intergenic	Intergenic	-2992	NM_024514	120227	Hs.371427	NM_024514	ENSG00000186104	CYP2R1	-	cytochrome P450 family 2 subfamily R member 1	protein-coding	6.04	34.0633	19.67	3.70667	2.325	2
Merged-chr11-15075153-5	chr11	15074746	15075536	FALSE	TRUE	TRUE	Intergenic	Intergenic	-20005	NM_000728	797	Hs.534305	NM_000728	ENSG00000175868	CALCB	CALC2|CGRP-II|CGRP2	calcitonin related polypeptide beta	protein-coding	2.57	31.4267	13.485	2.73	3.1	3.51
Merged-chr11-15869803-3	chr11	15869579	15870020	FALSE	FALSE	TRUE	Intergenic	L1ME4a|LINE|L1	121368	NR_106721	102464826		NR_106721	ENSG00000284094	MIR6073	hsa-mir-6073	microRNA 6073	ncRNA	1.615	7.05	9.635	1.76	1.745	2
Merged-chr11-15955479-3	chr11	15955358	15955594	FALSE	TRUE	FALSE	Intergenic	Intergenic	35691	NR_106721	102464826		NR_106721	ENSG00000284094	MIR6073	hsa-mir-6073	microRNA 6073	ncRNA	0.81	7.93667	3.245	0.693333	0.78	1
Merged-chr11-16023601-4	chr11	16023219	16023910	FALSE	TRUE	FALSE	intron (NM_001145811, intron 12 of 14)	intron (NM_001145811, intron 12 of 14)	-32397	NR_106721	102464826		NR_106721	ENSG00000284094	MIR6073	hsa-mir-6073	microRNA 6073	ncRNA	7.835	44.5667	18.855	7.53667	5.815	7.02
Merged-chr11-16030782-3	chr11	16030622	16030917	FALSE	FALSE	TRUE	intron (NM_001145811, intron 12 of 14)	intron (NM_001145811, intron 12 of 14)	-39602	NR_106721	102464826		NR_106721	ENSG00000284094	MIR6073	hsa-mir-6073	microRNA 6073	ncRNA	1.21	6.93	12.715	1.79333	2.325	3.51
Merged-chr11-16323265-4	chr11	16323079	16323446	FALSE	TRUE	FALSE	intron (NM_033326, intron 3 of 15)	intron (NM_033326, intron 3 of 15)	101151	NM_001145819	55553	Hs.368226	NM_017508	ENSG00000110693	SOX6	HSSOX6|SOXD	SRY-box 6	protein-coding	2.72	10.3433	6.075	1.23667	2.135	2.51
Merged-chr11-16377570-6	chr11	16377089	16378010	FALSE	TRUE	TRUE	intron (NM_033326, intron 1 of 15)	intron (NM_033326, intron 1 of 15)	46864	NM_001145819	55553	Hs.368226	NM_017508	ENSG00000110693	SOX6	HSSOX6|SOXD	SRY-box 6	protein-coding	6.775	49.1167	25.955	5.07	7.17	7.52
Merged-chr11-16429053-5	chr11	16428763	16429354	FALSE	TRUE	TRUE	intron (NM_033326, intron 1 of 15)	intron (NM_033326, intron 1 of 15)	1372	NM_001145811	55553	Hs.368226	NM_017508	ENSG00000110693	SOX6	HSSOX6|SOXD	SRY-box 6	protein-coding	3.445	30.35	28.2	3.41333	1.94	2.51
Merged-chr11-16480728-4	chr11	16480526	16480924	FALSE	TRUE	FALSE	intron (NM_033326, intron 1 of 15)	L1MEc|LINE|L1	17210	NM_033326	55553	Hs.368226	NM_017508	ENSG00000110693	SOX6	HSSOX6|SOXD	SRY-box 6	protein-coding	2.64	15.18	13.94	2.62667	2.13	1.5
Merged-chr11-17099391-5	chr11	17099212	17099660	FALSE	TRUE	TRUE	promoter-TSS (NM_001017)	promoter-TSS (NM_001017)	-216	NM_001017	6207	Hs.446588	NM_001017	ENSG00000110700	RPS13	S13	ribosomal protein S13	protein-coding	7.725	41.2867	18.405	5.35	4.46	2
Merged-chr11-17302236-5	chr11	17301930	17302538	FALSE	TRUE	TRUE	intron (NM_001352672, intron 1 of 14)	intron (NM_001352672, intron 1 of 14)	3717	NM_001352670	4925	Hs.654599	NM_005013	ENSG00000070081	NUCB2	HEL-S-109|NEFA	nucleobindin 2	protein-coding	3.37	28.6267	23.345	2.58333	4.265	5.51
Merged-chr11-19690143-4	chr11	19689882	19690404	FALSE	TRUE	FALSE	intron (NM_001111018, intron 1 of 37)	intron (NM_001111018, intron 1 of 37)	-44738	NM_145117	89797	Hs.64341	NM_145117	ENSG00000166833	NAV2	HELAD1|POMFIL2|RAINB1|STEERIN2|UNC53H2	neuron navigator 2	protein-coding	1.025	19.11	10.495	1.51667	0.585	1
Merged-chr11-19976779-3	chr11	19976514	19976970	FALSE	TRUE	FALSE	intron (NM_001111018, intron 10 of 37)	AluJb|SINE|Alu	-67360	NM_001111019	89797	Hs.64341	NM_145117	ENSG00000166833	NAV2	HELAD1|POMFIL2|RAINB1|STEERIN2|UNC53H2	neuron navigator 2	protein-coding	1.21	13.2367	5.645	1.51333	2.91	2
Merged-chr11-20000506-5	chr11	20000253	20000843	FALSE	TRUE	TRUE	intron (NM_001111018, intron 10 of 37)	intron (NM_001111018, intron 10 of 37)	-43554	NM_001111019	89797	Hs.64341	NM_145117	ENSG00000166833	NAV2	HELAD1|POMFIL2|RAINB1|STEERIN2|UNC53H2	neuron navigator 2	protein-coding	8.24	67.94	46.665	7.42667	5.04	6.52
Merged-chr11-20057600-5	chr11	20057136	20058147	FALSE	TRUE	TRUE	exon (NM_001111019, exon 3 of 28)	exon (NM_001111019, exon 3 of 28)	13208	NR_046672	100874014	Hs.557916	NR_046672	ENSG00000254453	NAV2-AS2	-	NAV2 antisense RNA 2	ncRNA	13.025	102.37	45.445	9.35333	5.815	10.02
Merged-chr11-20311844-5	chr11	20311571	20312072	FALSE	TRUE	TRUE	Intergenic	Intergenic	-73410	NM_006410	10553	Hs.90753	NM_006410	ENSG00000109854	HTATIP2	CC3|SDR44U1|TIP30	HIV-1 Tat interactive protein 2	protein-coding	1.21	18.9567	10.63	1.23333	1.555	0.5
Merged-chr11-20315278-3	chr11	20315140	20315432	FALSE	TRUE	FALSE	Intergenic	FLAM_A|SINE|Alu	-69945	NM_006410	10553	Hs.90753	NM_006410	ENSG00000109854	HTATIP2	CC3|SDR44U1|TIP30	HIV-1 Tat interactive protein 2	protein-coding	0.96	15.64	4.965	1.23333	0.97	1.5
Merged-chr11-20389353-3	chr11	20389176	20389515	FALSE	TRUE	FALSE	TTS (NM_001098523)	TTS (NM_001098523)	3658	NM_001098523	10553	Hs.90753	NM_006410	ENSG00000109854	HTATIP2	CC3|SDR44U1|TIP30	HIV-1 Tat interactive protein 2	protein-coding	2.825	17.72	8.18	3.02	3.295	3.01
Merged-chr11-20522941-5	chr11	20522484	20523310	FALSE	TRUE	TRUE	intron (NM_001145167, intron 14 of 14)	intron (NM_001145167, intron 14 of 14)	-98049	NM_001318369	9152	Hs.136557	NM_004211	ENSG00000165970	SLC6A5	GLYT-2|GLYT2|HKPX3|NET1	solute carrier family 6 member 5	protein-coding	9.04	72.58	37.15	7.93667	7.365	5.51
Merged-chr11-22817658-3	chr11	22817459	22817850	FALSE	TRUE	FALSE	intron (NR_147085, intron 10 of 10)	HAL1|LINE|L1	33271	NR_135213	258010	Hs.349096	NM_148893	ENSG00000198168	SVIP	-	small VCP interacting protein	protein-coding	1.325	9.85667	5.395	1.79333	1.55	1
Merged-chr11-22997885-4	chr11	22997741	22998033	FALSE	FALSE	TRUE	Intergenic	THE1B-int|LTR|ERVL-MaLR	-115915	NM_001195637	100500938	Hs.555029	NM_001195637	ENSG00000255359	CCDC179	-	coiled-coil domain containing 179	protein-coding	1.43	9.94	9.2	0.676667	0.585	1
Merged-chr11-26318989-4	chr11	26318782	26319239	FALSE	FALSE	TRUE	intron (NM_001313726, intron 1 of 27)	intron (NM_001313726, intron 1 of 27)	-9456	NR_132968	105376599	Hs.125537	NR_132968	ENSG00000254819	LOC105376599	-	uncharacterized LOC105376599	ncRNA	3.675	14.6167	10.13	2.19	1.745	3.01
Merged-chr11-26619606-4	chr11	26619307	26619832	FALSE	FALSE	TRUE	intron (NM_001313726, intron 15 of 27)	intron (NM_001313726, intron 15 of 27)	-25754	NM_001135091	143662	Hs.407152	NM_145650	ENSG00000169550	MUC15	MUC-15|PAS3|PASIII	mucin 15, cell surface associated	protein-coding	3.985	15.4967	17.135	3.14333	1.94	3.01
Merged-chr11-26771676-2	chr11	26771544	26771822	FALSE	FALSE	TRUE	Intergenic	Intergenic	-28109	NM_178498	159963	Hs.148907	NM_178498	ENSG00000148942	SLC5A12	SMCT2	solute carrier family 5 member 12	protein-coding	0.59	3.65667	8.59	0.683333	0.97	0.5
Merged-chr11-27238158-4	chr11	27238012	27238327	FALSE	FALSE	TRUE	intron (NR_125767, intron 2 of 4)	intron (NR_125767, intron 2 of 4)	2146	NR_125768	103695435	Hs.196133	NR_125766	ENSG00000254560	BBOX1-AS1	-	BBOX1 antisense RNA 1	ncRNA	2.055	7.50333	8.59	1.63667	1.16	2.51
Merged-chr11-27255894-5	chr11	27255605	27256147	FALSE	TRUE	TRUE	Intergenic	Intergenic	-14216	NR_125767	103695435	Hs.196133	NR_125766	ENSG00000254560	BBOX1-AS1	-	BBOX1 antisense RNA 1	ncRNA	3.735	41.07	22.165	5.90667	3.485	2.51
Merged-chr11-28133610-4	chr11	28133443	28133804	FALSE	FALSE	TRUE	intron (NM_001297775, intron 2 of 6)	intron (NM_001297775, intron 2 of 6)	3825	NM_001297775	196074	Hs.243326	NM_152636	ENSG00000169519	METTL15	METT5D1	methyltransferase like 15	protein-coding	0.405	10.1267	12.445	1.94	2.33	1
Merged-chr11-28139511-4	chr11	28139307	28139818	FALSE	TRUE	FALSE	intron (NM_001297775, intron 3 of 6)	AluYc|SINE|Alu	9764	NM_001297775	196074	Hs.243326	NM_152636	ENSG00000169519	METTL15	METT5D1	methyltransferase like 15	protein-coding	3.41	16.4767	12.125	3.30667	3.1	1
Merged-chr11-28198184-4	chr11	28197967	28198392	FALSE	FALSE	TRUE	intron (NM_001297775, intron 3 of 6)	intron (NM_001297775, intron 3 of 6)	68381	NM_001297775	196074	Hs.243326	NM_152636	ENSG00000169519	METTL15	METT5D1	methyltransferase like 15	protein-coding	3.48	14.2167	16.095	1.79	1.165	3.01
Merged-chr11-28882662-3	chr11	28882435	28882823	FALSE	TRUE	FALSE	Intergenic	Intergenic	-383534	NR_107035	102466876		NR_107035	ENSG00000273912	MIR8068	hsa-mir-8068	microRNA 8068	ncRNA	0.995	11.2567	3.72	1.65667	1.355	2
Merged-chr11-29344762-3	chr11	29344623	29344928	FALSE	TRUE	FALSE	Intergenic	L1MA7|LINE|L1	-271185	NR_149107	105376606	Hs.577275	NR_149106	ENSG00000255117	LINC02546	-	long intergenic non-protein coding RNA 2546	ncRNA	1.21	13.54	4.67	2.49	2.135	1
Merged-chr11-29517423-4	chr11	29517275	29517552	FALSE	FALSE	TRUE	Intergenic	Intergenic	-98547	NR_149107	105376606	Hs.577275	NR_149106	ENSG00000255117	LINC02546	-	long intergenic non-protein coding RNA 2546	ncRNA	1.245	7.95333	7.73	0.693333	0.585	1.5
Merged-chr11-30129574-5	chr11	30129151	30129867	FALSE	TRUE	TRUE	Intergenic	Intergenic	-90932	NM_002233	3739	Hs.592002	NM_002233	ENSG00000182255	KCNA4	HBK4|HK1|HPCN2|HUKII|KCNA4L|KCNA8|KV1.4|PCN2	potassium voltage-gated channel subfamily A member 4	protein-coding	2.975	38.9067	21.74	5.33	2.325	2.51
Merged-chr11-30344535-5	chr11	30344188	30344915	FALSE	TRUE	TRUE	promoter-TSS (NM_152316)	promoter-TSS (NM_152316)	-95	NM_152316	120534	Hs.502208	NM_152316	ENSG00000152219	ARL14EP	ARF7EP|C11orf46|dJ299F11.1	ADP ribosylation factor like GTPase 14 effector protein	protein-coding	5.82	28.6833	14.075	6.57667	6.98	10.02
Merged-chr11-31832816-5	chr11	31832530	31833223	FALSE	TRUE	TRUE	promoter-TSS (NM_001604)	promoter-TSS (NM_001604)	25	NM_001258464	5080	Hs.270303	NM_000280	ENSG00000007372	PAX6	AN|AN2|ASGD5|D11S812E|FVH1|MGDA|WAGR	paired box 6	protein-coding	5.5	23.79	15.98	4.65667	3.485	3.01
Merged-chr11-31836844-5	chr11	31836573	31837152	FALSE	TRUE	TRUE	intron (NM_001258462, intron 1 of 13)	CpG-3993	-1252	NR_033971	440034	Hs.523576	NR_033971	ENSG00000281880	PAX6-AS1	DKFZp686K1684	PAX6 antisense RNA 1	ncRNA	3.11	38.1967	15.455	4.25667	2.905	5.01
Merged-chr11-32113336-5	chr11	32113060	32113763	FALSE	TRUE	TRUE	intron (NM_002901, intron 1 of 5)	intron (NM_002901, intron 1 of 5)	934	NM_002901	5954	Hs.97887	NM_002901	ENSG00000049449	RCN1	HEL-S-84|PIG20|RCAL|RCN	reticulocalbin 1	protein-coding	9.96	34.4433	33.865	3.28667	5.43	11.53
Merged-chr11-32140666-5	chr11	32140180	32141020	FALSE	TRUE	TRUE	Intergenic	Intergenic	24858	NR_132770	106635521		NR_132770		SNORA88	-	small nucleolar RNA, H/ACA box 88	snoRNA	6.015	39.0767	20.08	8.75	6.395	6.01
Merged-chr11-32198064-2	chr11	32197922	32198206	FALSE	FALSE	TRUE	Intergenic	Intergenic	-32606	NR_132770	106635521		NR_132770		SNORA88	-	small nucleolar RNA, H/ACA box 88	snoRNA	2.305	7.48333	9.675	1.92333	3.295	0.5
Merged-chr11-33934482-5	chr11	33934237	33934684	FALSE	TRUE	TRUE	Intergenic	Intergenic	-20624	NM_005574	4005	Hs.34560	NM_005574	ENSG00000135363	LMO2	LMO-2|RBTN2|RBTNL1|RHOM2|TTG2	LIM domain only 2	protein-coding	0.995	19.97	10.405	1.50667	0.78	2
Merged-chr11-34037253-5	chr11	34036998	34037492	FALSE	TRUE	TRUE	Intergenic	Intergenic	-35985	NM_005898	4076	Hs.471818	NM_005898	ENSG00000135387	CAPRIN1	GPIAP1|GPIP137|GRIP137|M11S1|RNG105|p137GPI	cell cycle associated protein 1	protein-coding	1.835	19.1267	16.185	2.60333	1.55	0.5
Merged-chr11-34243773-4	chr11	34243531	34244035	FALSE	FALSE	TRUE	intron (NM_145804, intron 1 of 16)	MER4B|LTR|ERV1	116672	NM_001144030	55226	Hs.577281	NM_024662	ENSG00000135372	NAT10	ALP|Kre33|NET43	N-acetyltransferase 10	protein-coding	3.345	16.75	16.59	2.87	2.33	2.51
Merged-chr11-34260339-4	chr11	34260139	34260521	FALSE	FALSE	TRUE	intron (NM_145804, intron 1 of 16)	AluSc8|SINE|Alu	119225	NM_145804	25841	Hs.23361	NM_145804	ENSG00000166016	ABTB2	ABTB2A|BTBD22	ankyrin repeat and BTB domain containing 2	protein-coding	1.835	13.1967	13.395	2.74667	1.355	4.01
Merged-chr11-34330973-3	chr11	34330838	34331120	FALSE	TRUE	FALSE	intron (NM_145804, intron 1 of 16)	Arthur1|DNA|hAT-Tip100	48576	NM_145804	25841	Hs.23361	NM_145804	ENSG00000166016	ABTB2	ABTB2A|BTBD22	ankyrin repeat and BTB domain containing 2	protein-coding	2.79	15.2167	4.645	2.61	2.13	3.51
Merged-chr11-34338146-4	chr11	34337806	34338508	FALSE	FALSE	TRUE	intron (NM_145804, intron 1 of 16)	intron (NM_145804, intron 1 of 16)	41398	NM_145804	25841	Hs.23361	NM_145804	ENSG00000166016	ABTB2	ABTB2A|BTBD22	ankyrin repeat and BTB domain containing 2	protein-coding	5.015	23.0867	15.23	4.64	5.23	2.51
Merged-chr11-34361191-4	chr11	34360847	34361492	FALSE	TRUE	FALSE	intron (NM_145804, intron 1 of 16)	intron (NM_145804, intron 1 of 16)	18386	NM_145804	25841	Hs.23361	NM_145804	ENSG00000166016	ABTB2	ABTB2A|BTBD22	ankyrin repeat and BTB domain containing 2	protein-coding	7.07	45.1233	20.38	5.99667	6.59	7.52
Merged-chr11-34366915-4	chr11	34366611	34367114	TRUE	FALSE	FALSE	intron (NM_145804, intron 1 of 16)	L2a|LINE|L2	12693	NM_145804	25841	Hs.23361	NM_145804	ENSG00000166016	ABTB2	ABTB2A|BTBD22	ankyrin repeat and BTB domain containing 2	protein-coding	8.275	26.8633	16.64	6.15333	2.91	5.51
Merged-chr11-34393387-6	chr11	34393058	34393848	TRUE	TRUE	TRUE	Intergenic	AluSx|SINE|Alu	-13898	NM_145804	25841	Hs.23361	NM_145804	ENSG00000166016	ABTB2	ABTB2A|BTBD22	ankyrin repeat and BTB domain containing 2	protein-coding	14.275	133.753	70.54	12.1767	5.04	9.02
Merged-chr11-34402453-4	chr11	34402244	34402645	FALSE	TRUE	FALSE	Intergenic	Intergenic	-22889	NM_145804	25841	Hs.23361	NM_145804	ENSG00000166016	ABTB2	ABTB2A|BTBD22	ankyrin repeat and BTB domain containing 2	protein-coding	1.945	15.99	5.915	2.34667	2.325	1.5
Merged-chr11-34448854-6	chr11	34448439	34449203	TRUE	TRUE	TRUE	Intergenic	MamRep564|Unknown|Unknown	-11651	NM_001752	847	Hs.502302	NM_001752	ENSG00000121691	CAT	-	catalase	protein-coding	21.72	151.013	45.335	8.77667	7.755	7.52
Merged-chr11-34523191-4	chr11	34523032	34523381	FALSE	TRUE	FALSE	intron (NM_198381, intron 2 of 6)	intron (NM_198381, intron 2 of 6)	10140	NM_001243081	2001	Hs.11713	NM_001422	ENSG00000135374	ELF5	ESE2	E74 like ETS transcription factor 5	protein-coding	3.38	25.95	12.965	3.97667	2.715	3.01
Merged-chr11-34616350-5	chr11	34616093	34616660	FALSE	TRUE	TRUE	Intergenic	Intergenic	-26212	NM_012153	26298	Hs.653859	NM_012153	ENSG00000135373	EHF	ESE3|ESE3B|ESEJ	ETS homologous factor	protein-coding	2.5	35.9433	24.365	3.14333	3.685	2.51
Merged-chr11-34676550-5	chr11	34676142	34676914	FALSE	TRUE	TRUE	intron (NM_001206616, intron 6 of 8)	intron (NM_001206616, intron 6 of 8)	22517	NM_001206616	26298	Hs.653859	NM_012153	ENSG00000135373	EHF	ESE3|ESE3B|ESEJ	ETS homologous factor	protein-coding	10.18	63.3367	27.765	9.05	6.98	7.52
Merged-chr11-34701872-5	chr11	34701662	34702069	FALSE	TRUE	TRUE	Intergenic	Intergenic	47854	NM_001206616	26298	Hs.653859	NM_012153	ENSG00000135373	EHF	ESE3|ESE3B|ESEJ	ETS homologous factor	protein-coding	1.65	16.6433	9.86	2.05667	2.52	1.5
Merged-chr11-34707041-5	chr11	34706758	34707242	FALSE	TRUE	TRUE	Intergenic	Intergenic	52989	NM_001206616	26298	Hs.653859	NM_012153	ENSG00000135373	EHF	ESE3|ESE3B|ESEJ	ETS homologous factor	protein-coding	1.98	38.12	22.485	6.29	1.935	5.01
Merged-chr11-35212435-3	chr11	35212285	35212614	FALSE	TRUE	FALSE	intron (NM_001202556, intron 5 of 7)	intron (NM_001202556, intron 5 of 7)	27952	NR_145794	109623487		NR_145794		SNORD164	-	small nucleolar RNA, C/D box 164	snoRNA	2.235	16.83	5.17	3.14	2.135	0.5
Merged-chr11-35214045-5	chr11	35213856	35214212	FALSE	TRUE	TRUE	intron (NM_001202556, intron 5 of 7)	intron (NM_001202556, intron 5 of 7)	29537	NR_145794	109623487		NR_145794		SNORD164	-	small nucleolar RNA, C/D box 164	snoRNA	3.805	19.41	9.705	2.87333	2.71	0.5
Merged-chr11-35249691-4	chr11	35249391	35250044	FALSE	FALSE	TRUE	intron (NM_001001392, intron 3 of 3)	intron (NM_001001392, intron 3 of 3)	65220	NR_145794	109623487		NR_145794		SNORD164	-	small nucleolar RNA, C/D box 164	snoRNA	2.35	22.1067	10.385	3.15333	3.295	2
Merged-chr11-35325695-5	chr11	35325403	35326107	FALSE	TRUE	TRUE	intron (NM_001195728, intron 6 of 11)	intron (NM_001195728, intron 6 of 11)	115350	NM_004171	6506	Hs.502338	NM_004171	ENSG00000110436	SLC1A2	EAAT2|EIEE41|GLT-1|HBGT	solute carrier family 1 member 2	protein-coding	4.83	62.6367	23.275	5.74333	5.235	6.01
Merged-chr11-35359043-3	chr11	35358871	35359350	FALSE	TRUE	FALSE	intron (NM_001195728, intron 1 of 11)	intron (NM_001195728, intron 1 of 11)	81995	NM_004171	6506	Hs.502338	NM_004171	ENSG00000110436	SLC1A2	EAAT2|EIEE41|GLT-1|HBGT	solute carrier family 1 member 2	protein-coding	3.11	17.3633	8.23	5.91333	3.49	6.52
Merged-chr11-35381843-4	chr11	35381683	35382013	FALSE	TRUE	FALSE	intron (NM_001195728, intron 1 of 11)	intron (NM_001195728, intron 1 of 11)	59257	NM_004171	6506	Hs.502338	NM_004171	ENSG00000110436	SLC1A2	EAAT2|EIEE41|GLT-1|HBGT	solute carrier family 1 member 2	protein-coding	1.87	25.8333	8.885	4.10667	2.52	4.01
Merged-chr11-35601392-5	chr11	35600946	35601735	FALSE	TRUE	TRUE	Intergenic	Intergenic	-38395	NM_014344	24147	Hs.39384	NM_014344	ENSG00000179431	FJX1	-	four jointed box 1	protein-coding	4.365	51.4367	22.87	4.93333	4.075	5.01
Merged-chr11-35772098-5	chr11	35771935	35772320	FALSE	TRUE	TRUE	intron (NM_017583, intron 4 of 4)	MER103C|DNA|hAT-Charlie	87827	NM_017583	54765	Hs.192103	NM_017583	ENSG00000166326	TRIM44	AN3|DIPB|HSA249128|MC7	tripartite motif containing 44	protein-coding	6.525	19.2833	15.28	3.46	1.745	2.51
Merged-chr11-35949494-6	chr11	35949200	35949754	TRUE	TRUE	TRUE	Intergenic	Intergenic	-16054	NM_174902	143458	Hs.745134	NM_174902	ENSG00000179241	LDLRAD3	LRAD3	low density lipoprotein receptor class A domain containing 3	protein-coding	7.835	55.8667	14.64	3.31667	1.745	2
Merged-chr11-38230721-5	chr11	38230497	38230994	FALSE	TRUE	TRUE	Intergenic	Intergenic	270594	NR_135110	105376633	Hs.135690	NR_135110	ENSG00000254516	LOC105376633	-	uncharacterized LOC105376633	ncRNA	3.15	16.5967	15.64	0.55	1.745	2
Merged-chr11-38367107-3	chr11	38366877	38367300	FALSE	TRUE	FALSE	Intergenic	MIR3|SINE|MIR	300818	NR_120555	103312105	Hs.641711	NR_120554	ENSG00000255175	LOC103312105	-	uncharacterized LOC103312105	ncRNA	2.56	14.5067	6.53	1.80333	2.71	2.51
Merged-chr11-42367650-2	chr11	42367388	42367834	FALSE	FALSE	TRUE	Intergenic	Looper|DNA|PiggyBac	-92371	NR_038309	100507205	Hs.99310	NR_038309		LOC100507205	-	uncharacterized LOC100507205	ncRNA	2.455	4.20333	11.675	2.05667	1.55	1.5
Merged-chr11-43890840-4	chr11	43890662	43891045	FALSE	TRUE	FALSE	Intergenic	MLT1H|LTR|ERVL-MaLR	-11504	NM_139178	221120	Hs.720708	NM_139178	ENSG00000166199	ALKBH3	ABH3|DEPC-1|DEPC1|PCA1|hABH3	alkB homolog 3, alpha-ketoglutaratedependent dioxygenase	protein-coding	2.975	18.11	8.23	2.87333	1.745	1.5
Merged-chr11-43942530-5	chr11	43942047	43942901	FALSE	TRUE	TRUE	promoter-TSS (NR_038907)	promoter-TSS (NR_038907)	20	NR_038907	100507300	Hs.664588	NR_038907	ENSG00000244926	ALKBH3-AS1	-	ALKBH3 antisense RNA 1	ncRNA	8.89	94.63	49.345	9.18333	3.88	6.01
Merged-chr11-44005813-4	chr11	44005616	44006038	FALSE	FALSE	TRUE	Intergenic	Intergenic	41721	NM_001145033	387763	Hs.530443	NM_001145033	ENSG00000187479	C11orf96	AG2	chromosome 11 open reading frame 96	protein-coding	2.42	9.64	12.17	1.50333	1.745	0.5
Merged-chr11-44323664-4	chr11	44323385	44323956	FALSE	FALSE	TRUE	intron (NM_021926, intron 1 of 3)	intron (NM_021926, intron 1 of 3)	8046	NM_021926	60529	Hs.436055	NM_021926	ENSG00000052850	ALX4	CRS5|FND2	ALX homeobox 4	protein-coding	1.87	19.2633	15.115	2.46667	1.555	2.51
Merged-chr11-44355134-5	chr11	44354860	44355612	FALSE	TRUE	TRUE	Intergenic	Intergenic	-23520	NM_021926	60529	Hs.436055	NM_021926	ENSG00000052850	ALX4	CRS5|FND2	ALX homeobox 4	protein-coding	5.68	44.8633	18.38	6.02	3.685	12.03
Merged-chr11-45084707-4	chr11	45084559	45084873	FALSE	FALSE	TRUE	Intergenic	Tigger3|DNA|TcMar-Tigger	-30848	NM_001359633	56981	Hs.178715	NM_001256695	ENSG00000019485	PRDM11	PFM8	PR/SET domain 11	protein-coding	1.395	7.53	7.91	1.09333	0.78	1
Merged-chr11-45128827-3	chr11	45128700	45128994	FALSE	TRUE	FALSE	intron (NM_001359633, intron 2 of 7)	MIRc|SINE|MIR	13283	NM_001359633	56981	Hs.178715	NM_001256695	ENSG00000019485	PRDM11	PFM8	PR/SET domain 11	protein-coding	2.67	10.5	2.765	0.96	1.36	1
Merged-chr11-45479285-4	chr11	45479121	45479430	FALSE	TRUE	FALSE	Intergenic	Intergenic	86327	NR_122071	399886	Hs.559970	NR_122071	ENSG00000255267	LOC399886	-	uncharacterized LOC399886	ncRNA	0.655	10.8233	5.51	0.676667	0.585	0.5
Merged-chr11-45507139-5	chr11	45506668	45507427	FALSE	TRUE	TRUE	Intergenic	Intergenic	114099	NR_122071	399886	Hs.559970	NR_122071	ENSG00000255267	LOC399886	-	uncharacterized LOC399886	ncRNA	3.11	35.13	17.135	3.82	3.1	3.51
Merged-chr11-45758399-3	chr11	45758103	45758901	FALSE	TRUE	FALSE	Intergenic	MIRb|SINE|MIR	14644	NR_047569	100507384	Hs.259426	NR_047569	ENSG00000254519	LOC100507384	-	uncharacterized LOC100507384	ncRNA	4.105	28.43	9.675	4.23333	2.905	2.51
Merged-chr11-46141017-4	chr11	46140665	46141388	FALSE	FALSE	TRUE	intron (NM_001352028, intron 1 of 18)	intron (NM_001352028, intron 1 of 18)	1344	NM_001352029	51317	Hs.502458	NM_016621	ENSG00000135365	PHF21A	BHC80|BM-006	PHD finger protein 21A	protein-coding	5.83	22.0633	18.135	5.74667	6.01	6.01
Merged-chr11-46264854-6	chr11	46264443	46265201	TRUE	TRUE	TRUE	Intergenic	Intergenic	-34367	NM_052854	90993	Hs.405961	NM_052854	ENSG00000157613	CREB3L1	OASIS	cAMP responsive element binding protein 3 like 1	protein-coding	26.665	88.8733	59.7	8.32333	7.755	7.52
Merged-chr11-46575894-6	chr11	46575538	46576152	TRUE	TRUE	TRUE	intron (NM_001267782, intron 1 of 19)	intron (NM_001267782, intron 1 of 19)	37069	NM_017749	55626	Hs.654644	NM_017749	ENSG00000110497	AMBRA1	DCAF3|WDR94	autophagy and beclin 1 regulator 1	protein-coding	9.775	49.7	20.49	7.3	5.625	4.01
Merged-chr11-47211038-5	chr11	47210874	47211201	FALSE	TRUE	TRUE	Intergenic	Intergenic	-3027	NM_001184974	29763	Hs.334639	NM_016223	ENSG00000165912	PACSIN3	SDPIII	protein kinase C and casein kinase substrate in neurons 3	protein-coding	4.39	28.3	14.89	4.38667	3.295	2.51
Merged-chr11-47242156-5	chr11	47241935	47242430	FALSE	TRUE	TRUE	intron (NM_001300734, intron 3 of 5)	intron (NM_001300734, intron 3 of 5)	5689	NM_001300734	1643	Hs.700338	NM_000107	ENSG00000134574	DDB2	DDBB|UV-DDB2|XPE	damage specific DNA binding protein 2	protein-coding	2.825	35.34	21.145	4.25	1.94	3.01
Merged-chr11-47517004-4	chr11	47516784	47517186	FALSE	TRUE	FALSE	promoter-TSS (NM_198700)	promoter-TSS (NM_198700)	-912	NM_198700	10658	Hs.595333	NM_006560	ENSG00000149187	CELF1	BRUNOL2|CUG-BP|CUGBP|CUGBP1|EDEN-BP|NAB50|NAPOR|hNab50	CUGBP Elav-like family member 1	protein-coding	2.975	17.9767	7.615	1.64667	1.55	1
Merged-chr11-47572385-4	chr11	47572167	47572617	FALSE	FALSE	TRUE	intron (NM_006560, intron 1 of 13)	intron (NM_006560, intron 1 of 13)	2400	NM_006560	10658	Hs.595333	NM_006560	ENSG00000149187	CELF1	BRUNOL2|CUG-BP|CUGBP|CUGBP1|EDEN-BP|NAB50|NAPOR|hNab50	CUGBP Elav-like family member 1	protein-coding	2.015	13.34	10.61	3.12	3.295	3.01
Merged-chr11-47685051-3	chr11	47684772	47685292	FALSE	TRUE	FALSE	intron (NM_024783, intron 17 of 18)	MIRb|SINE|MIR	-20826	NM_001317231	23788	Hs.269944	NM_014342	ENSG00000109919	MTCH2	HSPC032|MIMP|SLC25A50	mitochondrial carrier 2	protein-coding	1.245	14.2	7.865	2.88667	2.905	3.51
Merged-chr11-47745828-5	chr11	47745667	47746012	FALSE	TRUE	TRUE	intron (NM_015308, intron 13 of 16)	AluJo|SINE|Alu	-8911	NM_024783	79841	Hs.147377	NM_024783	ENSG00000165923	AGBL2	CCP2	ATP/GTP binding protein like 2	protein-coding	6.075	34.4067	13.69	6.04333	6.205	4.01
Merged-chr11-47929930-3	chr11	47929604	47930099	FALSE	TRUE	FALSE	Intergenic	MIRb|SINE|MIR	-59755	NM_001318399	23279	Hs.643526	NM_015231	ENSG00000030066	NUP160	-	nucleoporin 160	protein-coding	2.975	16.42	6.915	2.73667	1.94	2.51
Merged-chr11-48012147-5	chr11	48011929	48012374	FALSE	TRUE	TRUE	intron (NM_001098503, intron 1 of 8)	AluSz|SINE|Alu	10041	NM_002843	5795	Hs.318547	NM_002843	ENSG00000149177	PTPRJ	CD148|DEP1|HPTPeta|R-PTP-ETA|SCC1	protein tyrosine phosphatase, receptor type J	protein-coding	4.105	27.6433	17.205	5.08	3.105	2
Merged-chr11-48020506-4	chr11	48020332	48020696	FALSE	TRUE	FALSE	intron (NM_001098503, intron 1 of 8)	intron (NM_001098503, intron 1 of 8)	18404	NM_002843	5795	Hs.318547	NM_002843	ENSG00000149177	PTPRJ	CD148|DEP1|HPTPeta|R-PTP-ETA|SCC1	protein tyrosine phosphatase, receptor type J	protein-coding	1.21	21.59	11.175	3.45333	3.295	1
Merged-chr11-48096165-4	chr11	48096004	48096338	FALSE	TRUE	FALSE	intron (NM_001098503, intron 1 of 8)	intron (NM_001098503, intron 1 of 8)	-22163	NR_036119	100423000		NR_036119	ENSG00000263693	MIR3161	-	microRNA 3161	ncRNA	1.835	12.92	7.23	1.09333	0.585	1.5
Merged-chr11-48367213-4	chr11	48367044	48367517	FALSE	TRUE	FALSE	exon (NM_001005513, exon 2 of 3)	exon (NM_001005513, exon 2 of 3)	6719	NM_001005513	403257	Hs.554533	NM_001005513	ENSG00000260811	OR4C45	-	olfactory receptor family 4 subfamily C member 45 (gene/pseudogene)	protein-coding	2.64	19.5567	7.5	1.76667	1.36	3.01
Merged-chr11-49255283-5	chr11	49254928	49255533	FALSE	TRUE	TRUE	Intergenic	Intergenic	-25008	NM_001193471	2346	Hs.551896	NM_004476	ENSG00000086205	FOLH1	FGCP|FOLH|GCP2|GCPII|NAALAD1|NAALAdase|PSM|PSMA|mGCP	folate hydrolase 1	protein-coding	3.515	23.1467	11.855	2.46333	2.325	0.5
Merged-chr11-57092707-6	chr11	57092471	57093087	FALSE	TRUE	TRUE	promoter-TSS (NM_033396)	promoter-TSS (NM_033396)	-366	NM_033396	85456	Hs.530730	NM_033396	ENSG00000149115	TNKS1BP1	TAB182	tankyrase 1 binding protein 1	protein-coding	7.24	38.7967	27.83	6.70667	4.265	4.51
Merged-chr11-57202337-5	chr11	57202138	57202523	FALSE	TRUE	TRUE	Intergenic	MLT2F|LTR|ERVL	-7277	NM_017611	29015	Hs.99962	NM_014096	ENSG00000134802	SLC43A3	EEG1|FOAP-13|PRO1659|SEEEG-1	solute carrier family 43 member 3	protein-coding	5.605	55.59	19.47	4.41667	3.875	3.51
Merged-chr11-57261263-6	chr11	57260900	57261727	TRUE	TRUE	TRUE	intron (NM_003627, intron 8 of 14)	MIRc|SINE|MIR	21045	NM_001198810	8501	Hs.591952	NM_003627	ENSG00000149150	SLC43A1	LAT3|PB39|POV1|R00504	solute carrier family 43 member 1	protein-coding	32.335	149.843	104.47	5.79333	5.235	5.51
Merged-chr11-57320138-5	chr11	57319917	57320321	FALSE	TRUE	TRUE	intron (NM_004223, intron 3 of 3)	intron (NM_004223, intron 3 of 3)	10005	NM_001105565	219537	Hs.68756	NM_001105565	ENSG00000214872	SMTNL1	CHASM	smoothelin like 1	protein-coding	7.205	49.93	25.48	4.65333	4.265	3.01
Merged-chr11-57479013-4	chr11	57478843	57479250	FALSE	FALSE	TRUE	promoter-TSS (NR_037645)	promoter-TSS (NR_037645)	749	NM_001317078	219541	Hs.43619	NM_153450	ENSG00000156603	MED19	DT2P1G7|LCMR1|MED19AS	mediator complex subunit 19	protein-coding	3.01	16.51	14.805	4.12333	4.07	3.01
Merged-chr11-57566648-4	chr11	57566277	57566938	FALSE	TRUE	FALSE	intron (NM_001085459, intron 6 of 19)	intron (NM_001085459, intron 6 of 19)	37373	NM_001085467	1500	Hs.166011	NM_001331	ENSG00000198561	CTNND1	BCDS2|CAS|CTNND|P120CAS|P120CTN|p120|p120(CAS)|p120(CTN)	catenin delta 1	protein-coding	6.305	31.72	14.71	5.31333	5.815	6.01
Merged-chr11-57918936-5	chr11	57918738	57919143	FALSE	TRUE	TRUE	intron (NM_001005212, intron 2 of 2)	intron (NM_001005212, intron 2 of 2)	-32024	NM_001005211	219954	Hs.632122	NM_001005211	ENSG00000172377	OR9I1	OR11-228	olfactory receptor family 9 subfamily I member 1	protein-coding	3.805	16.55	13.415	1.92667	1.745	4.01
Merged-chr11-58329536-6	chr11	58329192	58330295	TRUE	TRUE	TRUE	intron (NM_001307951, intron 2 of 7)	intron (NM_001307951, intron 2 of 7)	13647	NM_004811	9404	Hs.125474	NM_004811	ENSG00000110031	LPXN	LDPL	leupaxin	protein-coding	11.965	87.01	35.855	9.06333	8.145	8.52
Merged-chr11-58374890-5	chr11	58374321	58375122	FALSE	TRUE	TRUE	intron (NM_001197051, intron 2 of 10)	intron (NM_001197051, intron 2 of 10)	-15425	NM_000614	1270	Hs.524920	NM_000614	ENSG00000242689	CNTF	HCNTF	ciliary neurotrophic factor	protein-coding	6.665	21.8967	21.215	6.17	5.04	6.52
Merged-chr11-58394741-4	chr11	58394475	58394927	FALSE	FALSE	TRUE	Intergenic	Intergenic	4555	NM_000614	1270	Hs.524920	NM_000614	ENSG00000242689	CNTF	HCNTF	ciliary neurotrophic factor	protein-coding	2.67	14.1367	13.055	2.60333	1.55	1
Merged-chr11-58426451-3	chr11	58426170	58426641	FALSE	TRUE	FALSE	Intergenic	Intergenic	36259	NM_000614	1270	Hs.524920	NM_000614	ENSG00000242689	CNTF	HCNTF	ciliary neurotrophic factor	protein-coding	1.795	13.2933	6.03	1.91333	2.71	2.51
Merged-chr11-58694139-4	chr11	58693756	58694397	FALSE	TRUE	FALSE	intron (NM_001354699, intron 2 of 7)	HERVK22-int|LTR|ERVK	-1026	NM_001220494	92292	Hs.38085	NM_080661	ENSG00000166840	GLYATL1	GATF-C|GNAT	glycine-N-acyltransferase like 1	protein-coding	3.01	23.44	14.145	4.39333	3.875	3.01
Merged-chr11-58713377-3	chr11	58713199	58713549	FALSE	TRUE	FALSE	intron (NM_080661, intron 2 of 6)	intron (NM_080661, intron 2 of 6)	2652	NM_080661	92292	Hs.38085	NM_080661	ENSG00000166840	GLYATL1	GATF-C|GNAT	glycine-N-acyltransferase like 1	protein-coding	5.72	19.3167	7.435	3.40667	3.295	4.01
Merged-chr11-59425700-4	chr11	59425515	59425902	FALSE	FALSE	TRUE	intron (NM_152716, intron 4 of 18)	L1ME1|LINE|L1	10803	NM_152716	219988	Hs.591960	NM_152716	ENSG00000166889	PATL1	Pat1b|hPat1b	PAT1 homolog 1, processing body mRNA decay factor	protein-coding	2.525	11.91	10.585	0.96	0.775	2.51
Merged-chr11-60253540-3	chr11	60253364	60253698	FALSE	TRUE	FALSE	Intergenic	Intergenic	-6720	NM_001164470	54860	Hs.272789	NM_017716	ENSG00000071203	MS4A12	Ms4a10	membrane spanning 4-domains A12	protein-coding	1.43	19.5133	8.455	3.86	4.46	4.51
Merged-chr11-61146321-3	chr11	61146161	61146473	FALSE	TRUE	FALSE	Intergenic	L1MEg1|LINE|L1	-13515	NM_001173991	51259	Hs.26745	NM_016499	ENSG00000187049	TMEM216	HSPC244	transmembrane protein 216	protein-coding	2.535	16.2133	7.75	2.19333	2.91	3.51
Merged-chr11-61524683-4	chr11	61524475	61524894	FALSE	FALSE	TRUE	non-coding (NR_026882, exon 2 of 4)	non-coding (NR_026882, exon 2 of 4)	452	NR_026882	26070	Hs.564254	NR_026882	ENSG00000124915	DKFZP434K028	-	uncharacterized LOC26070	ncRNA	4.66	18.4767	18.29	3.82667	2.905	4.51
Merged-chr11-61717357-5	chr11	61717085	61717727	FALSE	TRUE	TRUE	promoter-TSS (NM_001300786)	promoter-TSS (NM_001300786)	50	NM_001300786	7439	Hs.524910	NM_004183	ENSG00000167995	BEST1	ARB|BEST|BMD|RP50|TU15B|VMD2	bestrophin 1	protein-coding	3.595	47.5667	27.29	5.08	2.715	3.51
Merged-chr11-61726659-3	chr11	61726506	61726819	FALSE	TRUE	FALSE	intron (NR_134580, intron 7 of 10)	intron (NR_134580, intron 7 of 10)	8470	NM_002032	2495	Hs.524910	NM_002032	ENSG00000167996	FTH1	FHC|FTH|FTHL6|HFE5|PIG15|PLIF	ferritin heavy chain 1	protein-coding	1.545	17.72	6.955	2.06	1.36	3.01
Merged-chr11-61740356-5	chr11	61740039	61740704	FALSE	TRUE	TRUE	Intergenic	Intergenic	-5239	NM_002032	2495	Hs.524910	NM_002032	ENSG00000167996	FTH1	FHC|FTH|FTHL6|HFE5|PIG15|PLIF	ferritin heavy chain 1	protein-coding	8.795	36.0133	48.46	6.83	5.815	5.01
Merged-chr11-61746739-4	chr11	61746532	61746937	FALSE	FALSE	TRUE	Intergenic	Intergenic	-11602	NM_002032	2495	Hs.524910	NM_002032	ENSG00000167996	FTH1	FHC|FTH|FTHL6|HFE5|PIG15|PLIF	ferritin heavy chain 1	protein-coding	3.01	10.3867	10.88	1.77667	1.36	3.01
Merged-chr11-61793198-5	chr11	61792693	61793564	FALSE	TRUE	TRUE	Intergenic	Intergenic	-57996	NM_002032	2495	Hs.524910	NM_002032	ENSG00000167996	FTH1	FHC|FTH|FTHL6|HFE5|PIG15|PLIF	ferritin heavy chain 1	protein-coding	5.385	47.5167	28.99	7.50667	6.59	11.53
Merged-chr11-61822023-5	chr11	61821630	61822358	FALSE	TRUE	TRUE	Intergenic	HERVK3-int|LTR|ERVK	-69451	NM_001040694	3619	Hs.142179	NM_020238	ENSG00000149503	INCENP	-	inner centromere protein	protein-coding	4.91	61.07	37.49	4.51333	4.655	6.01
Merged-chr11-62041535-5	chr11	62041235	62041862	FALSE	TRUE	TRUE	TTS (NM_002411)	TTS (NM_002411)	3921	NM_002411	4250	Hs.46452	NM_002411	ENSG00000110484	SCGB2A2	MGB1|UGB2	secretoglobin family 2A member 2	protein-coding	8.14	36.7533	18.135	6.28333	4.655	4.01
Merged-chr11-62193113-3	chr11	62192899	62193350	FALSE	TRUE	FALSE	Intergenic	Intergenic	6617	NM_003357	7356	Hs.523732	NM_003357	ENSG00000149021	SCGB1A1	CC10|CC16|CCPBP|CCSP|UGB|UP-1|UP1	secretoglobin family 1A member 1	protein-coding	3.16	22.0133	5.53	3.14	2.905	1.5
Merged-chr11-62195454-4	chr11	62195185	62195632	FALSE	FALSE	TRUE	Intergenic	Mam_R4|LINE|Dong-R4	8901	NM_003357	7356	Hs.523732	NM_003357	ENSG00000149021	SCGB1A1	CC10|CC16|CCPBP|CCSP|UGB|UP-1|UP1	secretoglobin family 1A member 1	protein-coding	2.055	17.5867	10.745	3.57333	1.165	3.51
Merged-chr11-62408558-5	chr11	62408274	62408857	FALSE	TRUE	TRUE	promoter-TSS (NM_001329224)	promoter-TSS (NM_001329224)	-875	NM_001329224	23193	Hs.595071	NM_014610	ENSG00000089597	GANAB	G2AN|GIIA|GLUII|PKD3	glucosidase II alpha subunit	protein-coding	5.015	32.95	15.525	3.29667	3.1	2.51
Merged-chr11-62649274-6	chr11	62648982	62649744	TRUE	TRUE	TRUE	non-coding (NR_037193, exon 1 of 9)	non-coding (NR_037193, exon 1 of 9)	192	NR_037193	6520	Hs.502769	NM_002394	ENSG00000168003	SLC3A2	4F2|4F2HC|4T2HC|CD98|CD98HC|MDU1|NACAE	solute carrier family 3 member 2	protein-coding	14.02	100.183	51.135	5.90667	6.395	10.02
Merged-chr11-63008591-5	chr11	63008258	63008847	FALSE	TRUE	TRUE	Intergenic	Intergenic	-11428	NM_199352	387601	Hs.332119	NM_199352	ENSG00000196600	SLC22A25	HIMTP|UST6	solute carrier family 22 member 25	protein-coding	10.515	60.2933	27.15	5.47667	5.04	5.51
Merged-chr11-63017872-4	chr11	63017638	63018181	FALSE	TRUE	FALSE	Intergenic	HERVL74-int|LTR|ERVL	-20785	NM_199352	387601	Hs.332119	NM_199352	ENSG00000196600	SLC22A25	HIMTP|UST6	solute carrier family 22 member 25	protein-coding	8.945	43.0833	15.145	6.32333	4.265	6.52
Merged-chr11-63019065-5	chr11	63018689	63019467	FALSE	TRUE	TRUE	Intergenic	HERVL74-int|LTR|ERVL	-21954	NM_199352	387601	Hs.332119	NM_199352	ENSG00000196600	SLC22A25	HIMTP|UST6	solute carrier family 22 member 25	protein-coding	7.435	45.8233	27.22	5.77667	4.07	8.02
Merged-chr11-63259262-5	chr11	63259085	63259422	FALSE	TRUE	TRUE	promoter-TSS (NM_001146729)	promoter-TSS (NM_001146729)	-573	NM_001146729	117245	Hs.410316	NM_054108	ENSG00000168004	HRASLS5	HRLP5|HRSL5|RLP1|iNAT	HRAS like suppressor family member 5	protein-coding	1.97	13.9633	8.025	0.966667	1.555	1
Merged-chr11-63342422-4	chr11	63342157	63342690	FALSE	TRUE	FALSE	exon (NM_001128203, exon 5 of 5)	exon (NM_001128203, exon 5 of 5)	-11568	NM_017878	54979	Hs.272805	NM_017878	ENSG00000133328	HRASLS2	PLA1/2-2	HRAS like suppressor 2	protein-coding	4.33	21.01	14.165	3.99	4.65	6.52
Merged-chr11-63440679-5	chr11	63440371	63441098	FALSE	TRUE	TRUE	Intergenic	Intergenic	-1288	NM_001290048	25923	Hs.356719	NM_015459	ENSG00000184743	ATL3	HSN1F	atlastin GTPase 3	protein-coding	4.3	30.17	14.165	3.81667	2.905	6.01
Merged-chr11-63456922-5	chr11	63456680	63457192	FALSE	TRUE	TRUE	intron (NM_006054, intron 1 of 6)	intron (NM_006054, intron 1 of 6)	8014	NM_001265589	10313	Hs.743229	NM_006054	ENSG00000133318	RTN3	ASYIP|HAP|NSPL2|NSPLII|RTN3-A1	reticulon 3	protein-coding	4	52.6833	38.69	5.05667	2.13	4.51
Merged-chr11-63858819-5	chr11	63858414	63859174	FALSE	TRUE	TRUE	intron (NM_014067, intron 3 of 10)	MamRep564|Unknown|Unknown	-12568	NM_013280	23769	Hs.584876	NM_013280	ENSG00000126500	FLRT1	SPG68	fibronectin leucine rich transmembrane protein 1	protein-coding	5.315	39.77	20.625	2.73333	2.52	2.51
Merged-chr11-64334202-5	chr11	64334007	64334447	FALSE	TRUE	TRUE	intron (NM_001307985, intron 6 of 7)	intron (NM_001307985, intron 6 of 7)	11154	NM_001307985	55867	Hs.220844	NM_018484	ENSG00000168065	SLC22A11	OAT4|hOAT4	solute carrier family 22 member 11	protein-coding	5.635	40.24	27.79	4.42	5.43	5.51
Merged-chr11-64653553-5	chr11	64653187	64653892	FALSE	TRUE	TRUE	Intergenic	L1MC4|LINE|L1	5179	NR_029578	406967		NR_029578	ENSG00000283926	MIR192	MIRN192|miR-192|miRNA192	microRNA 192	ncRNA	6.605	47.04	22.915	8.21333	4.845	5.51
Merged-chr11-65193925-5	chr11	65193543	65194294	FALSE	TRUE	TRUE	TTS (NR_028272)	TTS (NR_028272)	3649	NR_028272	283131	Hs.523789	NR_002802	ENSG00000245532	NEAT1	LINC00084|NCRNA00084|TncRNA|VINC	nuclear paraspeckle assembly transcript 1 (non-protein coding)	ncRNA	7.33	48.89	42.885	6.86667	6.59	8.02
Merged-chr11-65239749-4	chr11	65239576	65239977	FALSE	TRUE	FALSE	Intergenic	Intergenic	-25433	NR_144567	378938	Hs.621695	NR_002819	ENSG00000251562	MALAT1	HCN|LINC00047|NCRNA00047|NEAT2|PRO2853	metastasis associated lung adenocarcinoma transcript 1 (non-protein coding)	ncRNA	3.985	22.39	9.065	3.73	2.715	5.01
Merged-chr11-65240629-4	chr11	65240253	65240860	FALSE	FALSE	TRUE	Intergenic	AluSx3|SINE|Alu	-24653	NR_144567	378938	Hs.621695	NR_002819	ENSG00000251562	MALAT1	HCN|LINC00047|NCRNA00047|NEAT2|PRO2853	metastasis associated lung adenocarcinoma transcript 1 (non-protein coding)	ncRNA	2.49	16.1133	15.075	3.84667	2.715	3.01
Merged-chr11-65242612-3	chr11	65242440	65242862	FALSE	TRUE	FALSE	Intergenic	LTR37B|LTR|ERV1	-22558	NR_144567	378938	Hs.621695	NR_002819	ENSG00000251562	MALAT1	HCN|LINC00047|NCRNA00047|NEAT2|PRO2853	metastasis associated lung adenocarcinoma transcript 1 (non-protein coding)	ncRNA	1.28	14.5367	7.75	1.8	3.1	2.51
Merged-chr11-65255200-5	chr11	65255022	65255397	FALSE	TRUE	TRUE	Intergenic	Intergenic	-10000	NR_144567	378938	Hs.621695	NR_002819	ENSG00000251562	MALAT1	HCN|LINC00047|NCRNA00047|NEAT2|PRO2853	metastasis associated lung adenocarcinoma transcript 1 (non-protein coding)	ncRNA	6.69	30.9833	26.925	4.52333	5.425	3.51
Merged-chr11-65266105-5	chr11	65265689	65266451	FALSE	TRUE	TRUE	TTS (NR_145459)	TTS (NR_145459)	861	NR_002819	378938	Hs.621695	NR_002819	ENSG00000251562	MALAT1	HCN|LINC00047|NCRNA00047|NEAT2|PRO2853	metastasis associated lung adenocarcinoma transcript 1 (non-protein coding)	ncRNA	12.355	48.8733	39.73	6.99333	7.175	5.01
Merged-chr11-65267015-5	chr11	65266787	65267172	FALSE	TRUE	TRUE	non-coding (NR_145459, exon 1 of 1)	non-coding (NR_145459, exon 1 of 1)	1770	NR_002819	378938	Hs.621695	NR_002819	ENSG00000251562	MALAT1	HCN|LINC00047|NCRNA00047|NEAT2|PRO2853	metastasis associated lung adenocarcinoma transcript 1 (non-protein coding)	ncRNA	2.965	15.5833	13.69	3.28333	3.295	4.01
Merged-chr11-65331247-5	chr11	65330936	65331620	FALSE	TRUE	TRUE	Intergenic	MIR|SINE|MIR	-5579	NM_021070	4054	Hs.289019	NM_021070	ENSG00000168056	LTBP3	DASS|GPHYSD3|LTBP-3|LTBP2|STHAG6|pp6425	latent transforming growth factor beta binding protein 3	protein-coding	3.445	34.5733	19.06	5.47667	1.555	6.01
Merged-chr11-65628732-5	chr11	65628391	65629057	FALSE	TRUE	TRUE	intron (NM_025128, intron 2 of 15)	intron (NM_025128, intron 2 of 15)	852	NM_025128	80198	Hs.288798	NM_025128	ENSG00000172732	MUS81	SLX3	MUS81 structure-specific endonuclease subunit	protein-coding	5.165	24.0833	19.74	3.27	4.845	6.52
Merged-chr11-65823554-4	chr11	65823335	65823810	FALSE	FALSE	TRUE	intron (NM_006842, intron 5 of 21)	intron (NM_006842, intron 5 of 21)	2957	NR_145738	109616986		NR_145738		SNORD13F	-	small nucleolar RNA, C/D box 13F	snoRNA	2.275	18.2233	14.395	2.85	2.52	2.51
Merged-chr11-65887035-4	chr11	65886616	65887775	FALSE	FALSE	TRUE	intron (NM_018026, intron 1 of 23)	intron (NM_018026, intron 1 of 23)	49371	NM_018026	55690	Hs.644326	NM_018026	ENSG00000175115	PACS1	MRD17|SHMS	phosphofurin acidic cluster sorting protein 1	protein-coding	8.91	55.84	31.735	11.4733	9.11	7.52
Merged-chr11-65904483-3	chr11	65904258	65904743	FALSE	TRUE	FALSE	intron (NM_018026, intron 1 of 23)	L1M5|LINE|L1	66676	NM_018026	55690	Hs.644326	NM_018026	ENSG00000175115	PACS1	MRD17|SHMS	phosphofurin acidic cluster sorting protein 1	protein-coding	1.795	14.8567	7.8	3.87	3.685	2.51
Merged-chr11-65977168-4	chr11	65977002	65977351	FALSE	TRUE	FALSE	intron (NM_018026, intron 2 of 23)	AluSx1|SINE|Alu	-47589	NM_001134775	64837	Hs.280792	NM_022822	ENSG00000174996	KLC2	-	kinesin light chain 2	protein-coding	5.485	26.5867	8.275	4.40333	1.745	3.51
Merged-chr11-66085935-5	chr11	66085609	66086270	FALSE	TRUE	TRUE	Intergenic	MIRc|SINE|MIR	-1424	NM_020404	57124	Hs.195727	NM_020404	ENSG00000174807	CD248	CD164L1|TEM1	CD248 molecule	protein-coding	5.2	35.2367	18.745	3.97	5.04	4.01
Merged-chr11-66225526-4	chr11	66225380	66225807	FALSE	FALSE	TRUE	Intergenic	AluJb|SINE|Alu	-8205	NM_001243135	246330	Hs.656875	NM_145065	ENSG00000174516	PELI3	-	pellino E3 ubiquitin protein ligase family member 3	protein-coding	1.21	7.92333	8.77	2.33	1.16	2
Merged-chr11-66375152-5	chr11	66374875	66375401	FALSE	TRUE	TRUE	Intergenic	AluJb|SINE|Alu	-8915	NM_001198846	100526737	Hs.523822	NM_001198845	ENSG00000248643	RBM14-RBM4	COAZ	RBM14-RBM4 readthrough	protein-coding	1.18	23.7533	12.375	3.67333	5.04	4.01
Merged-chr11-66738285-5	chr11	66737968	66738602	FALSE	TRUE	TRUE	Intergenic	Intergenic	-4463	NM_001136485	254439	Hs.232604	NM_001136485	ENSG00000173237	C11orf86	-	chromosome 11 open reading frame 86	protein-coding	8.31	45.0667	20.33	8.35667	6.2	8.02
Merged-chr11-66841631-4	chr11	66841488	66841743	FALSE	TRUE	FALSE	Intergenic	Intergenic	17326	NM_001300886	29984	Hs.15114	NM_014578	ENSG00000173156	RHOD	ARHD|RHOHP1|RHOM|Rho	ras homolog family member D	protein-coding	1.43	7.75	6.955	1.09667	0.39	0.5
Merged-chr11-67349362-3	chr11	67348801	67349771	FALSE	TRUE	FALSE	Intergenic	MER11C|LTR|ERVK	-1780	NM_000852	2950	Hs.523836	NM_000852	ENSG00000084207	GSTP1	DFN7|FAEES3|GST3|GSTP|HEL-S-22|PI	glutathione S-transferase pi 1	protein-coding	5.57	24.91	11.29	6.73	5.43	6.52
Merged-chr11-67968296-4	chr11	67968124	67968504	FALSE	FALSE	TRUE	intron (NM_001300909, intron 1 of 8)	intron (NM_001300909, intron 1 of 8)	12470	NM_016028	51111	Hs.632120	NM_016028	ENSG00000110066	KMT5B	CGI-85|CGI85|MRD51|SUV420H1	lysine methyltransferase 5B	protein-coding	2.235	8.92333	15.005	1.51667	2.325	1.5
Merged-chr11-68034948-5	chr11	68034713	68035151	FALSE	TRUE	TRUE	intron (NM_001300913, intron 2 of 4)	intron (NM_001300913, intron 2 of 4)	4537	NM_001300913	53838	Hs.303025	NM_022338	ENSG00000171067	C11orf24	DM4E3	chromosome 11 open reading frame 24	protein-coding	2.235	25.5167	12.785	2.46	1.555	2
Merged-chr11-69432477-5	chr11	69432260	69432726	FALSE	TRUE	TRUE	Intergenic	Intergenic	-23380	NM_053056	595	Hs.523852	NM_053056	ENSG00000110092	CCND1	BCL1|D11S287E|PRAD1|U21B31	cyclin D1	protein-coding	1.545	21.1567	9.905	1.92333	1.555	2.51
Merged-chr11-69506438-5	chr11	69506091	69506768	FALSE	TRUE	TRUE	Intergenic	MER65C|LTR|ERV1	12677	NM_005117	9965	Hs.249200	NM_005117	ENSG00000162344	FGF19	-	fibroblast growth factor 19	protein-coding	5.535	99.7933	52.38	4.08667	2.715	6.52
Merged-chr11-69975279-3	chr11	69974997	69975499	FALSE	TRUE	FALSE	intron (NR_030691, intron 10 of 24)	intron (NR_030691, intron 10 of 24)	43732	NR_030691	55107	Hs.503074	NM_018043	ENSG00000131620	ANO1	DOG1|ORAOV2|TAOS2|TMEM16A	anoctamin 1	protein-coding	1.835	16.66	5.325	2.34	2.52	4.01
Merged-chr11-70105316-4	chr11	70105050	70105535	FALSE	TRUE	FALSE	Intergenic	Intergenic	-11514	NR_045286	8500	Hs.530749	NM_003626	ENSG00000131626	PPFIA1	LIP.1|LIP1|LIPRIN	PTPRF interacting protein alpha 1	protein-coding	3.125	16.52	9.975	2.57667	2.52	2.51
Merged-chr11-70262375-4	chr11	70262193	70262585	FALSE	FALSE	TRUE	intron (NM_138565, intron 7 of 16)	intron (NM_138565, intron 7 of 16)	17777	NM_138565	2017	Hs.596164	NM_005231	ENSG00000085733	CTTN	EMS1	cortactin	protein-coding	1.095	7.12	10.585	0.816667	0.775	1
Merged-chr11-70781252-5	chr11	70780808	70781680	FALSE	TRUE	TRUE	intron (NM_012309, intron 7 of 22)	Tigger7|DNA|TcMar-Tigger	-62771	NR_037437	100500844		NR_037437	ENSG00000263744	MIR3664	mir-3664	microRNA 3664	ncRNA	4.725	53.1933	29.465	4.40333	4.265	3.01
Merged-chr11-71658735-6	chr11	71658342	71659222	TRUE	TRUE	TRUE	intron (NM_001300926, intron 1 of 6)	L2|LINE|L2	19014	NR_024147	55298	Hs.368554	NM_018320	ENSG00000137522	RNF121	-	ring finger protein 121	protein-coding	17.19	94.8033	68.815	9.32	10.275	6.01
Merged-chr11-71910550-5	chr11	71910299	71910867	FALSE	TRUE	TRUE	Intergenic	Intergenic	7410	NM_016729	2348	Hs.73769	NM_000802	ENSG00000110195	FOLR1	FBP|FOLR	folate receptor 1	protein-coding	4.39	30.8233	22.37	3.29333	2.135	1.5
Merged-chr11-71984348-4	chr11	71984175	71984585	FALSE	TRUE	FALSE	Intergenic	L1MB7|LINE|L1	-29160	NM_005169	401	Hs.731115	NM_005169	ENSG00000165462	PHOX2A	ARIX|CFEOM2|FEOM2|NCAM2|PMX2A	paired like homeobox 2a	protein-coding	3.595	18.07	11.335	2.3	0.585	3.51
Merged-chr11-72145732-5	chr11	72145570	72145930	FALSE	TRUE	TRUE	promoter-TSS (NM_001258392)	promoter-TSS (NM_001258392)	-22	NM_001258392	81570	Hs.523877	NM_030813	ENSG00000162129	CLPB	ANKCLB|HSP78|MEGCANN|MGCA7|SKD3	ClpB homolog, mitochondrial AAA ATPase chaperonin	protein-coding	4.725	20.66	14.415	2.75667	1.935	3.51
Merged-chr11-72189982-4	chr11	72189814	72190245	FALSE	FALSE	TRUE	Intergenic	Intergenic	-44301	NM_001258392	81570	Hs.523877	NM_030813	ENSG00000162129	CLPB	ANKCLB|HSP78|MEGCANN|MGCA7|SKD3	ClpB homolog, mitochondrial AAA ATPase chaperonin	protein-coding	0.74	11.86	8.995	1.9	2.905	1.5
Merged-chr11-72489308-4	chr11	72489040	72489535	FALSE	TRUE	FALSE	intron (NM_006645, intron 2 of 6)	MIRb|SINE|MIR	-5288	NR_039841	100616410		NR_039841	ENSG00000265064	MIR4692	-	microRNA 4692	ncRNA	4.88	26.27	10.81	4.81	3.685	5.01
Merged-chr11-72552047-4	chr11	72551811	72552215	FALSE	TRUE	FALSE	intron (NM_014824, intron 18 of 19)	intron (NM_014824, intron 18 of 19)	26562	NM_001318766	89849	Hs.653186	NM_033388	ENSG00000168010	ATG16L2	ATG16B|WDR80	autophagy related 16 like 2	protein-coding	2.015	12.4667	8.07	1.51333	1.745	2.51
Merged-chr11-72673207-5	chr11	72672689	72673558	FALSE	TRUE	TRUE	intron (NM_014824, intron 8 of 19)	intron (NM_014824, intron 8 of 19)	82158	NR_039664	NA								5.385	36.7167	34.02	4.95333	3.68	8.52
Merged-chr11-72741356-4	chr11	72741239	72741505	FALSE	FALSE	TRUE	intron (NM_014824, intron 3 of 19)	intron (NM_014824, intron 3 of 19)	111771	NM_014824	9873	Hs.744959	NM_014824	ENSG00000137478	FCHSD2	NWK|SH3MD3	FCH and double SH3 domains 2	protein-coding	1.025	5.63	11.675	1.62	2.13	1
Merged-chr11-72850947-4	chr11	72850717	72851180	FALSE	TRUE	FALSE	intron (NM_014824, intron 2 of 19)	intron (NM_014824, intron 2 of 19)	2195	NM_014824	9873	Hs.744959	NM_014824	ENSG00000137478	FCHSD2	NWK|SH3MD3	FCH and double SH3 domains 2	protein-coding	3.33	28.7733	14.825	5.62333	4.845	5.01
Merged-chr11-72904898-3	chr11	72904740	72905101	FALSE	TRUE	FALSE	Intergenic	Intergenic	-24423	NM_176072	5029	Hs.339	NM_002564	ENSG00000175591	P2RY2	HP2U|P2RU1|P2U|P2U1|P2UR|P2Y2|P2Y2R	purinergic receptor P2Y2	protein-coding	0.96	17.39	5.645	1.51333	0.585	1.5
Merged-chr11-72909842-3	chr11	72909621	72910168	FALSE	TRUE	FALSE	Intergenic	L1MC3|LINE|L1	-19449	NM_176072	5029	Hs.339	NM_002564	ENSG00000175591	P2RY2	HP2U|P2RU1|P2U|P2U1|P2UR|P2Y2|P2Y2R	purinergic receptor P2Y2	protein-coding	3.33	22.06	8.59	4.38333	3.49	2
Merged-chr11-73451512-4	chr11	73451280	73451755	FALSE	FALSE	TRUE	intron (NM_001243718, intron 1 of 4)	intron (NM_001243718, intron 1 of 4)	19621	NM_001243719	5870	Hs.503222	NM_002869	ENSG00000175582	RAB6A	RAB6	RAB6A, member RAS oncogene family	protein-coding	2.93	13.0667	16.275	3.58	3.88	1.5
Merged-chr11-73468762-5	chr11	73468500	73469017	FALSE	TRUE	TRUE	intron (NM_001243718, intron 1 of 4)	intron (NM_001243718, intron 1 of 4)	2380	NM_001243719	5870	Hs.503222	NM_002869	ENSG00000175582	RAB6A	RAB6	RAB6A, member RAS oncogene family	protein-coding	4.185	30.9767	14.69	3.71	3.49	4.01
Merged-chr11-73495525-6	chr11	73495167	73495789	TRUE	TRUE	TRUE	Intergenic	AluYc|SINE|Alu	-3439	NR_134660	51642	Hs.503239	NM_016055	ENSG00000175581	MRPL48	CGI-118|HSPC290|L48MT|MRP-L48	mitochondrial ribosomal protein L48	protein-coding	12.345	61.0933	38.51	7.92333	5.235	5.51
Merged-chr11-73618572-5	chr11	73618360	73618839	FALSE	TRUE	TRUE	intron (NM_025155, intron 6 of 11)	L1MDa|LINE|L1	30585	NM_001267803	80227	Hs.525017	NM_025155	ENSG00000175575	PAAF1	PAAF|Rpn14|WDR71	proteasomal ATPase associated factor 1	protein-coding	2.015	34.3033	19.04	3.70667	2.715	2
Merged-chr11-73730495-3	chr11	73730336	73730650	FALSE	TRUE	FALSE	intron (NM_001286577, intron 32 of 32)	intron (NM_001286577, intron 32 of 32)	-10211	NM_022803	7352	Hs.101337	NM_003356	ENSG00000175564	UCP3	SLC25A9	uncoupling protein 3	protein-coding	4.29	12.8667	4.83	2.45667	1.745	4.51
Merged-chr11-74190625-4	chr11	74190365	74190905	FALSE	FALSE	TRUE	Intergenic	AluJb|SINE|Alu	-12035	NM_005472	10008	Hs.523899	NM_005472	ENSG00000175538	KCNE3	HOKPP|HYPP|MiRP2	potassium voltage-gated channel subfamily E regulatory subunit 3	protein-coding	4.66	20.69	20.175	4.36667	1.94	5.51
Merged-chr11-74322631-5	chr11	74322340	74322913	FALSE	TRUE	TRUE	intron (NM_006591, intron 4 of 11)	intron (NM_006591, intron 4 of 11)	18976	NR_046410	10714	Hs.82502	NM_006591	ENSG00000077514	POLD3	P66|P68|PPP1R128	DNA polymerase delta 3, accessory subunit	protein-coding	3.71	24.3267	17.59	5.19333	3.1	4.01
Merged-chr11-74466582-4	chr11	74466398	74466781	FALSE	TRUE	FALSE	intron (NM_001098638, intron 1 of 5)	L2c|LINE|L2	6676	NM_001098638	254225	Hs.370145	NM_001098638	ENSG00000166439	RNF169	-	ring finger protein 169	protein-coding	2.235	10.9667	10.745	1.93	2.325	0.5
Merged-chr11-74975083-4	chr11	74974780	74975328	FALSE	TRUE	FALSE	3' UTR (NM_020251, exon 15 of 15)	3' UTR (NM_020251, exon 15 of 15)	23104	NM_001195528	100507050	Hs.577323	NM_001195528	ENSG00000261594	TPBGL	-	trophoblast glycoprotein like	protein-coding	2.605	17.81	12.9	3.17333	1.165	3.01
Merged-chr11-75265774-5	chr11	75265484	75266071	FALSE	TRUE	TRUE	Intergenic	Intergenic	-7324	NM_001207014	871	Hs.596449	NM_001235	ENSG00000149257	SERPINH1	AsTP3|CBP1|CBP2|HSP47|OI10|PIG14|PPROM|RA-A47|SERPINH2|gp46	serpin family H member 1	protein-coding	2.605	36.3567	27.11	2.32333	1.355	2
Merged-chr11-75474101-6	chr11	75473846	75474440	TRUE	TRUE	TRUE	intron (NR_046090, intron 2 of 3)	intron (NR_046090, intron 2 of 3)	5549	NR_046090	283214	Hs.591972	NR_046090	ENSG00000247867	LOC283214	-	uncharacterized LOC283214	ncRNA	12.63	79.84	35.765	6.45333	4.265	3.01
Merged-chr11-76483729-3	chr11	76483504	76483934	FALSE	TRUE	FALSE	Intergenic	Intergenic	-9638	NM_001258210	25987	Hs.8361	NM_015516	ENSG00000182704	TSKU	E2IG4|LRRC54|TSK	tsukushi, small leucine rich proteoglycan	protein-coding	2.855	20.3667	8.455	3.55333	1.94	2.51
Merged-chr11-76503224-5	chr11	76503012	76503443	FALSE	TRUE	TRUE	5' UTR (NM_001318477, exon 1 of 2)	5' UTR (NM_001318477, exon 1 of 2)	431	NM_001318477	25987	Hs.8361	NM_015516	ENSG00000182704	TSKU	E2IG4|LRRC54|TSK	tsukushi, small leucine rich proteoglycan	protein-coding	2.67	24.8633	21.33	3.58	2.91	3.01
Merged-chr11-76772529-6	chr11	76772161	76772963	TRUE	TRUE	TRUE	Intergenic	AluSx|SINE|Alu	-5430	NM_004055	726	Hs.248153	NM_004055	ENSG00000149260	CAPN5	ADNIV|HTRA3|VRNI|nCL-3	calpain 5	protein-coding	16.66	78.0867	36.99	6.74667	5.04	4.01
Merged-chr11-77313585-3	chr11	77313276	77313837	FALSE	TRUE	FALSE	intron (NM_173039, intron 1 of 2)	Tigger12c|DNA|TcMar-Tigger	12876	NM_173039	282679	Hs.503345	NM_173039	ENSG00000178301	AQP11	AQPX1	aquaporin 11	protein-coding	3.11	25.8	9.045	4.93	3.295	4.01
Merged-chr11-77443199-4	chr11	77442796	77443492	FALSE	TRUE	FALSE	intron (NM_016578, intron 4 of 15)	THE1B-int|LTR|ERVL-MaLR	88736	NM_016578	51773	Hs.420229	NM_016578	ENSG00000048649	RSF1	HBXAP|RSF-1|XAP8|p325	remodeling and spacing factor 1	protein-coding	6.925	26.3467	15.185	6.18667	6.59	5.51
[truncated: 8,349 more rows]

## Sheet: (B) TRIB3 peak <2kb TSS genes
Nearest.PromoterID	Entrez.ID	Nearest.Unigene	Nearest.Refseq	Nearest.Ensembl	Gene.Name	Gene.Alias	Gene.Description
[truncated: 775 more rows]
