# Supplementary figures and images for: Pharmacological or TRIB3-Mediated Suppression of ATF4 Transcriptional Activity Promotes Hepatoma Cell Resistance to Proteasome Inhibitor Bortezomib
Source: MDPI journal article supplement (doi:10.3390/cancers13102341), 2021-05-12

**A**

**Proteasome Complex  
(GO:0000502)**

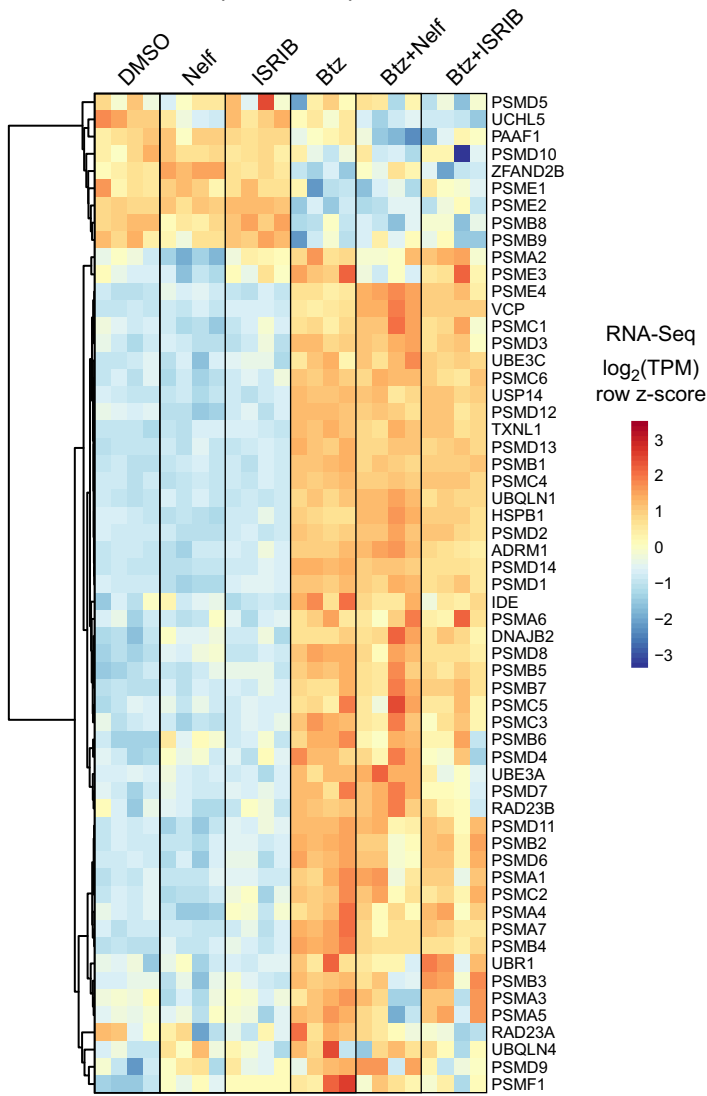**B**

**Gene set activity  
(Proteasome Complex GO:0000502)**

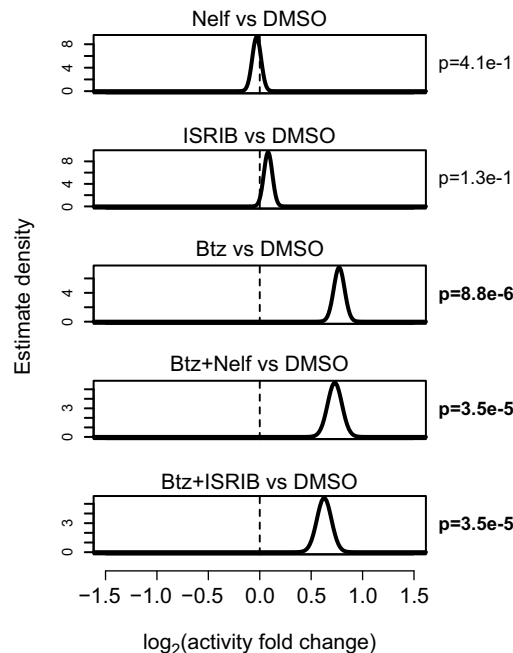

Supplement: s1 [file s1]

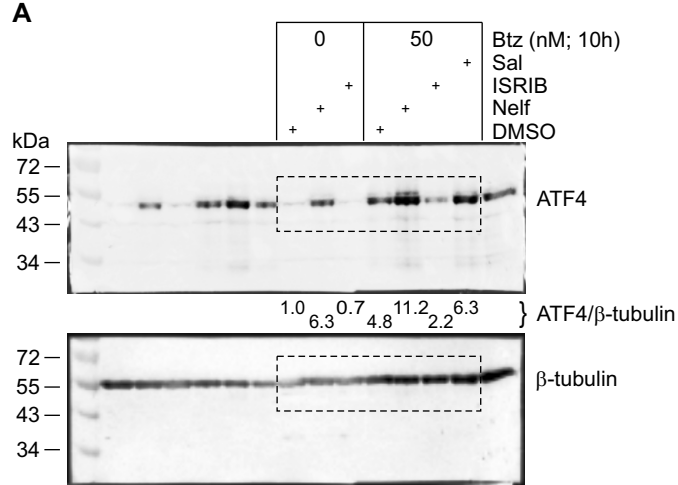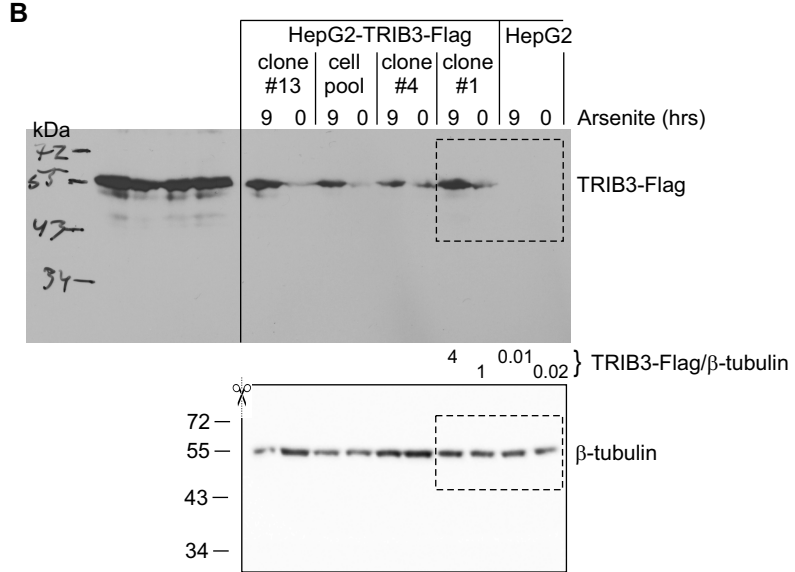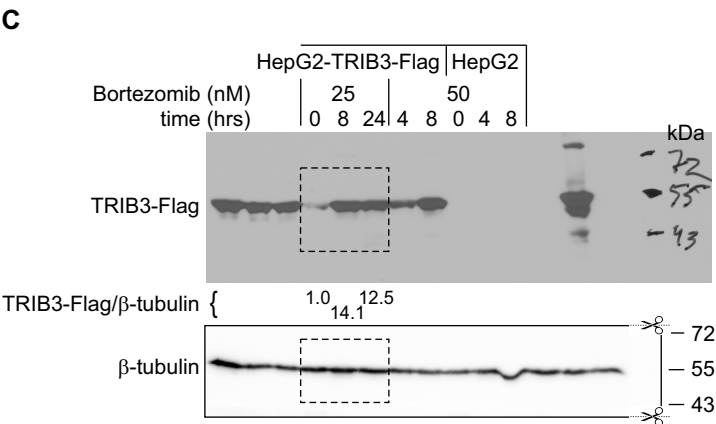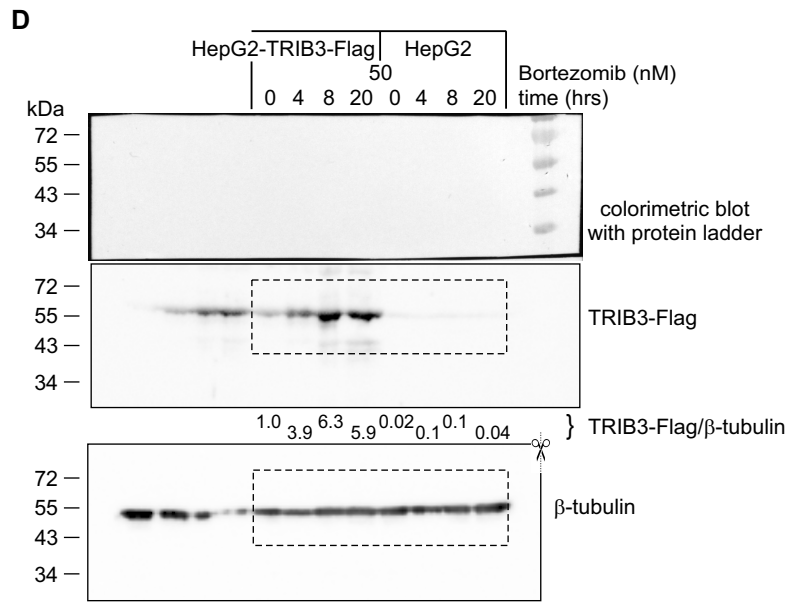

Supplement: s1 [file s1]
